# Supplementary material for: Investigation on spatiotemporal evolution and influencing factors of urban innovation space: a case study of Guangzhou
Source: Research Square preprint supplement (doi:10.21203/rs.3.rs-8356472/v1), 2026-01-16
Supplement: Supplementary file 1 [file MGWR_Processed data.xlsx]

## Sheet: Sheet1
FID	JWDZBX	JWDZBY	TYZBX	TYZBY	YBL	SR	PP	UR	RI	IP	ISH	DOED	LC	VC	CAF	SAC	BS	MS	SEAC	LE	BH	FC
0	113.280411949751	23.0848468951679	733596.782456831	2554735.70695326	4	0.367123	0.295379	0.48608	0.864237	0.208903	81.9446	13.9161	41	104	209	26	5	27	0.0316601	0.244408	0.016186	0.211856
4	113.553724876401	23.0896892273999	761596.78245683	2555735.70695326	2	0.898844	0.129709	3.61516	1.69176	0.832677	41.2498	36.1953	0	4	2	0	0	0	0.154524	1.35622	0.629745	1.30114
5	113.215087195325	23.2663481402228	726596.78245683	2574735.70695326	6	0.602118	0.436133	0.490637	2.7248	0.140232	75.7477	6.80836	1	5	31	4	1	0	0.353173	3.18616	0.376424	0.214586
6	113.231779118684	23.0945705028896	728596.78245683	2555735.70695326	7	0.243429	0.372273	0.396963	0.471231	0.585472	70.6313	10.8175	24	87	198	15	3	23	0.0732876	0.535746	0.133779	0.179336
11	113.242136140992	23.1305377027627	729596.782456829	2559735.70695326	19	0.409362	0.327819	1.3965	0.075971	0.0527655	70.6313	10.8175	51	101	189	10	9	26	0.0131094	0.494059	0.187369	0.182667
12	113.2798032305	23.0487421574502	733596.782456831	2550735.70695326	3	0.534018	0.661621	3.72236	1.64434	0.360527	60.97	9.63692	1	11	58	9	0	11	0.255175	1.36772	0.242921	0.289553
13	113.50595666334	23.1446187557912	756596.782456831	2561735.70695326	1	0.47175	1.64433	5.48805	0.957057	0.479172	41.2498	36.1953	1	20	19	1	0	2	0.059018	3.06636	0.336387	0.885878
14	113.331221204522	23.2014698203863	738596.782456831	2567735.70695326	14	0.214709	0.178034	0.724144	0.695085	0.011674	75.7477	6.80836	12	28	95	6	3	6	0.112937	0.644154	0.118723	0.0514269
15	113.298697597506	23.0123551527423	735596.782456831	2546735.70695326	8	0.479219	0.51113	0.559395	1.37556	0.0972017	60.97	9.63692	9	16	105	8	0	5	0.282717	1.1591	0.279026	0.446153
16	113.293552413143	23.2832771359824	734596.782456831	2576735.70695326	1	0.206417	0.162729	1.31059	1.57145	0.6399	75.7477	6.80836	3	6	46	14	1	0	0.625116	0.90509	0.254442	0.653922
17	113.288642122088	22.9944440926621	734596.782456831	2544735.70695326	1	0.282091	1.21766	2.17396	0.72156	0.464051	60.97	9.63692	1	5	3	0	0	0	0.288498	0.812073	0.458647	1.25098
18	113.317890683238	22.9940186349985	737596.782456831	2544735.70695326	3	0.460528	0.731684	2.65871	2.09274	0.872577	60.97	9.63692	0	2	0	0	0	3	0.628905	0.764683	0.541769	0.924873
20	113.263782753654	23.2566249232063	731596.782456829	2573735.70695326	5	0.0945487	0.174735	1.91587	1.56242	0.401813	75.7477	6.80836	1	10	20	2	0	0	0.209849	1.73661	0.643688	0.401253
24	113.425936729395	23.0375389824396	748596.782456829	2549735.70695326	8	0.299964	0.392917	0.570918	1.89585	0.587593	60.97	9.63692	1	1	62	1	1	0	0.346611	1.43648	0.366069	0.64938
26	113.458150253002	23.1995368360771	751596.78245683	2567735.70695326	3	0.250785	2.39745	3.01335	0.975843	0.225056	41.2498	36.1953	0	0	1	0	0	0	0.073096	1.82748	1.19261	1.91235
27	113.524460765639	23.0901600594347	758596.782456831	2555735.70695326	3	0.488437	0.376861	2.78916	1.13667	0.257988	41.2498	36.1953	2	10	35	3	0	1	0.46343	0.934523	0.519595	0.528247
29	113.516052750501	23.162512256549	757596.782456831	2563735.70695326	96	0.159073	0.38612	5.00757	0.391432	0.305253	41.2498	36.1953	0	5	5	0	0	1	0.285576	1.80153	0.851157	0.161672
31	113.322550437905	23.2647943693254	737596.782456831	2574735.70695326	7	0.613801	0.69601	2.0138	0.778222	0.421665	75.7477	6.80836	4	28	95	10	0	6	0.347551	1.3403	0.110319	0.449311
32	113.194956201726	23.2305167458087	724596.78245683	2570735.70695326	4	0.0529083	1.57524	2.7199	4.20045	0.413368	75.7477	6.80836	5	14	59	5	0	5	0.425646	0.691207	0.155929	0.34854
33	113.263325656771	23.2295466630981	731596.782456829	2570735.70695326	3	0.581984	0.847542	0.858564	1.29335	0.311867	75.7477	6.80836	3	18	21	2	1	1	0.236592	0.486637	0.328191	0.80032
34	113.270655711809	23.0849875285014	732596.78245683	2554735.70695326	15	0.522929	0.622799	0.548853	0.519669	0.218779	81.9446	13.9161	25	81	98	13	0	17	0.0828342	0.0855133	0.0355084	0.151009
35	113.544310367571	23.1078955477183	760596.782456829	2557735.70695326	6	0.361659	1.13307	4.91783	0.372765	0.489975	41.2498	36.1953	17	56	156	18	2	24	0.10987	1.32843	0.165988	0.11275
36	113.39973053675	23.2094669410819	745596.78245683	2568735.70695326	2	0.567872	1.49705	1.6881	2.55347	0.928926	92.7617	27.9773	0	0	0	0	0	0	1.14042	1.82317	1.28954	1.36076
37	113.261352836536	23.1122063615708	731596.782456829	2557735.70695326	3	0.0934938	0.446465	0.613618	0.085938	0.777255	96.5466	35.4904	22	79	125	36	3	8	0.0479965	0.391672	0.0592455	0.0405218
39	113.273398385753	23.247457718012	732596.78245683	2572735.70695326	2	0.280267	0.484218	1.30427	0.903321	0.0795851	75.7477	6.80836	4	28	165	24	0	12	0.166653	1.61355	0.157664	0.178284
42	113.369323850604	23.1467330320923	742596.78245683	2561735.70695326	21	0.769266	0.701717	0.622699	0.38417	0.588141	92.7617	27.9773	5	11	9	4	0	0	0.50194	1.74395	0.405262	0.257522
44	113.467085671724	23.1542597646846	752596.782456831	2562735.70695326	107	0.834616	1.11416	2.09862	0.794799	0.55077	41.2498	36.1953	0	3	0	0	0	0	0.240564	0.927316	0.844645	1.03882
49	113.270807432658	23.0940137459969	732596.78245683	2555735.70695326	7	0.200878	0.489418	0.635629	0.10671	0.664865	81.9446	13.9161	64	136	374	37	3	39	0.221573	0.365453	0.10091	0.0563901
52	113.21478880162	23.2482953976575	726596.78245683	2572735.70695326	1	0.304572	1.5158	2.44436	4.1164	0.382871	75.7477	6.80836	0	3	19	3	0	0	0.317198	1.19676	0.175653	0.880938
53	113.271567182465	23.1391446645346	732596.78245683	2560735.70695326	34	0.11966	0.332667	0.350757	0.218053	0.932965	96.5466	35.4904	40	59	71	10	7	10	0.211279	0.418778	0.148207	0.289445
58	113.214639716912	23.2392690094647	726596.78245683	2571735.70695326	2	0.220855	0.801798	2.67171	4.16905	0.191099	75.7477	6.80836	1	7	9	0	0	0	0.324183	0.269318	0.748776	0.574581
60	113.417314118128	23.1008653775663	747596.78245683	2556735.70695326	2	0.97025	1.19749	2.07057	0.858153	0.131287	81.9446	13.9161	1	16	20	2	0	5	0.264045	0.39575	0.139213	0.100267
62	113.456667611963	23.1183125716247	751596.78245683	2558735.70695326	4	0.902801	1.19127	1.96029	1.22383	0.591912	41.2498	36.1953	0	15	1	1	0	0	0.61863	1.31989	0.412314	0.70857
64	113.436989686071	23.1095903159964	749596.782456829	2557735.70695326	4	0.231261	0.717963	1.54894	0.0537616	0.133558	41.2498	36.1953	9	18	38	5	0	0	0.153813	1.06887	0.448585	0.0915886
71	113.27370465943	23.2655097352876	732596.78245683	2574735.70695326	9	0.137572	0.319247	2.15553	2.21557	0.122293	75.7477	6.80836	2	6	101	10	0	5	0.211363	0.858543	0.289081	0.810314
72	113.535402876514	23.1531747055041	759596.782456829	2562735.70695326	3	0.120428	1.16154	6.18722	1.59105	0.615037	41.2498	36.1953	1	4	7	1	0	0	0.573909	4.02187	0.70345	0.564118
73	113.398442997316	23.1372645954308	745596.78245683	2560735.70695326	11	1.30485	0.623717	1.44319	1.46343	0.788388	92.7617	27.9773	4	14	7	0	0	0	0.174546	0.848731	0.546685	0.686729
74	113.339573324274	23.1200935235826	739596.782456831	2558735.70695326	15	0.0133225	0.0797451	1.02489	0.539979	0.834417	92.7617	27.9773	23	79	77	10	2	5	0.249229	0.62521	0.285792	0.268008
75	113.244396268422	23.2659316699245	729596.782456829	2574735.70695326	4	0.159009	1.4148	0.412391	1.61983	0.370028	75.7477	6.80836	0	7	31	5	0	1	0.151425	3.71128	0.181698	1.10783
79	113.241386541386	23.0854058173371	729596.782456829	2554735.70695326	8	0.225499	0.0457029	0.705705	0.927149	0.232519	70.6313	10.8175	16	21	59	4	1	4	0.295381	0.504619	0.255724	0.705235
80	113.288489945658	22.9854178740832	734596.782456831	2543735.70695326	1	0.728327	0.64376	3.15876	1.50666	0.862329	60.97	9.63692	3	1	0	0	0	0	0.657081	0.91348	0.608915	1.02405
84	113.377335357532	23.0473052319819	743596.78245683	2550735.70695326	1	0.267324	0.397853	0.273488	0.424847	0.709567	60.97	9.63692	3	11	124	6	2	1	0.0672809	1.41743	0.106121	0.559267
87	113.388683794349	23.1374128356733	744596.78245683	2560735.70695326	22	0.712413	0.703151	1.68618	0.518937	0.162045	92.7617	27.9773	5	16	33	1	0	0	0.238637	0.701318	0.208967	0.397554
88	113.428371075637	23.1729167405206	748596.782456829	2564735.70695326	46	0.879308	1.03256	0.781372	0.261488	0.610761	92.7617	27.9773	1	5	5	0	0	0	0.161528	0.895092	0.584836	0.732948
90	113.487105631858	23.1810268869839	754596.782456831	2565735.70695326	9	0.334219	0.248302	2.49481	1.2011	0.667854	41.2498	36.1953	4	18	7	7	0	0	0.377313	0.830252	0.482954	0.40063
91	113.408847853507	23.1732167573116	746596.78245683	2564735.70695326	109	0.582929	0.492512	0.969739	0.696002	0.258334	92.7617	27.9773	2	32	8	0	1	1	0.276667	1.18423	0.604355	0.231314
92	113.368847980726	23.1196564215056	742596.78245683	2558735.70695326	1	0.531464	0.699605	0.95723	0.463204	0.407407	92.7617	27.9773	35	100	150	12	1	21	0.164694	0.614059	0.0360651	0.172939
94	113.234476104748	23.2570448547261	728596.78245683	2573735.70695326	1	0.996512	1.71851	1.3512	2.46609	0.295021	75.7477	6.80836	0	3	18	2	0	1	0.170924	2.80138	0.745244	0.823698
95	113.300539348738	23.1206678876225	735596.782456831	2558735.70695326	1	0.0803697	0.303335	0.742416	0.0948463	0.855214	96.5466	35.4904	43	51	44	2	16	4	0.327817	0.525845	0.199313	0.154645
96	113.556121966885	23.2160287231541	761596.78245683	2569735.70695326	3	0.593223	1.06109	1.46	1.15322	0.537282	41.2498	36.1953	3	3	3	1	0	1	0.0218662	4.75117	0.454242	0.480556
99	113.380842064677	23.2458652610942	743596.78245683	2572735.70695326	1	1.49084	2.05769	1.8013	3.09441	1.23614	75.7477	6.80836	0	0	1	0	0	0	1.07921	6.01633	1.77824	2.73532
100	113.298850652095	23.0213812759377	735596.782456831	2547735.70695326	14	0.523718	0.508362	1.03018	0.851138	0.635732	60.97	9.63692	2	10	7	0	0	0	0.480962	1.31792	0.521891	0.527797
102	113.464555568967	23.0369372055731	752557.045417619	2549735.21020804	1	0.874665	0.976926	2.86274	1.54897	0.630869	60.97	9.63692	0	2	0	0	1	0	0.344315	5.05366	0.682893	0.709781
104	113.544991613034	23.1439929592005	760596.782456829	2561735.70695326	6	1.29453	0.665738	6.81845	0.219177	0.358257	41.2498	36.1953	2	4	6	2	1	1	0.145425	4.41532	1.56476	1.56203
108	113.264529693813	23.3017396200197	731595.129774317	2578733.96269545	5	0.125879	0.533246	3.35573	0.767209	0.960049	75.7477	6.80836	3	6	17	0	1	0	0.233696	2.53689	0.340428	0.644785
109	113.244547549039	23.2749578441133	729596.782456829	2575735.70695326	4	0.6831	0.93019	0.249305	0.694579	0.431912	75.7477	6.80836	0	1	6	0	0	0	0.013966	3.98	0.279896	0.555773
110	113.282859104526	23.229264041777	733596.782456831	2570735.70695326	12	0.0998161	0.320503	1.49972	0.326372	0.20507	75.7477	6.80836	12	56	252	13	1	19	0.137353	0.26966	0.137518	0.624863
114	113.370277744317	23.2008859464288	742596.78245683	2567735.70695326	1	0.106893	0.118401	0.314565	0.185011	0.529845	92.7617	27.9773	7	31	260	12	1	6	0.0653429	1.13547	0.0759451	0.159775
116	113.263935272096	23.2656509872835	731596.782456829	2574735.70695326	7	0.569755	0.672361	1.66907	2.4505	0.535677	75.7477	6.80836	1	1	1	0	0	0	0.507648	1.75573	0.792769	0.880538
121	113.212560367883	23.1128983931996	726596.78245683	2557735.70695326	2	0.363052	0.558794	0.557857	0.115288	0.211886	70.6313	10.8175	27	60	47	5	0	8	0.272828	0.392503	0.0239407	0.101407
125	113.272328843625	23.1842753011731	732596.78245683	2565735.70695326	10	0.06326	0.016466	2.03974	1.20159	0.657387	75.7477	6.80836	2	27	94	14	1	11	0.220709	0.293015	0.39688	0.476194
126	113.299156992712	23.0394334885676	735596.782456831	2549735.70695326	12	0.447869	0.639135	2.9254	0.491425	0.519882	60.97	9.63692	24	44	92	4	0	5	0.388714	0.338804	0.267441	0.366658
127	113.358616641299	23.0927258214377	741596.78245683	2555735.70695326	2	0.219541	0.69843	0.300997	0.158903	0.309971	81.9446	13.9161	3	17	88	6	0	8	0.166998	0.694374	0.182136	0.581773
128	113.387565991333	23.0742347350223	744596.78245683	2553735.70695326	5	0.31831	0.353494	0.615085	0.6424	0.918456	81.9446	13.9161	0	3	0	0	0	0	0.460985	1.32688	0.111606	1.38734
130	113.427882736793	23.1458413941003	748596.782456829	2561735.70695326	4	0.782547	1.04937	0.984847	1.29609	0.793123	92.7617	27.9773	3	12	8	2	1	3	0.214675	2.13344	0.592441	0.346749
132	113.447893970606	23.1726143071267	750596.782456829	2564735.70695326	139	0.142931	0.219013	1.4146	0.484276	0.482162	41.2498	36.1953	0	17	13	3	0	1	0.099343	0.721792	0.326096	0.483946
134	113.565540848616	23.1978213887774	762596.78245683	2567735.70695326	21	0.403155	0.411367	0.791559	1.11337	0.431932	41.2498	36.1953	1	22	27	3	2	4	0.0719245	6.94382	0.395175	0.39805
135	113.309680202399	23.0844213842697	736596.782456831	2554735.70695326	1	0.375478	0.265355	0.882805	0.747167	0.391335	81.9446	13.9161	13	65	193	21	1	15	0.100425	0.603469	0.172733	0.192051
136	113.32021177785	23.1294077748043	737596.782456831	2559735.70695326	63	0.562308	0.262451	1.04047	0.0583673	0.599	92.7617	27.9773	24	123	325	26	3	31	0.130887	0.131936	0.084205	0.114799
139	113.54123520207	23.0634631393832	760367.32712574	2552808.13209638	2	1.98886	0.730698	1.09895	0.961622	0.268639	41.2498	36.1953	0	3	0	0	0	0	0.741011	1.65099	0.925607	0.758042
140	113.396521369632	23.0289597117144	745596.78245683	2548735.70695326	1	0.622166	1.24453	0.451968	0.832782	1.06087	60.97	9.63692	0	1	0	0	0	0	0.698108	1.52865	0.874794	0.766544
141	113.438623600362	23.1998408730303	749596.782456829	2567735.70695326	3	0.932809	0.931428	3.7309	1.63829	1.05523	41.2498	36.1953	0	0	1	0	0	0	0.943054	1.33038	0.440463	1.22106
146	113.243188749929	23.1937218698115	729596.782456829	2566735.70695326	5	0.405951	0.745651	1.37059	1.27947	0.704404	75.7477	6.80836	0	14	21	3	0	0	0.211938	0.229856	0.365794	0.593969
147	113.195547438709	23.2666227510922	724596.78245683	2574735.70695326	1	0.443639	0.467536	1.39371	4.34463	1.42702	75.7477	6.80836	0	0	1	0	0	0	0.401141	3.86697	1.22128	1.76913
148	113.20221283507	23.0769284591793	725596.78245683	2553735.70695326	8	0.307287	0.231398	1.67874	1.22154	0.489543	70.6313	10.8175	3	9	36	4	2	2	0.200017	1.5697	0.169197	0.508975
149	113.322978643358	23.2907863618227	737594.449566637	2577615.45444078	1	0.70638	1.44975	2.26844	0.847045	0.699407	75.7477	6.80836	0	0	0	0	0	0	0.476038	1.45936	0.537718	0.609509
153	113.436826745752	23.1005651975068	749596.782456829	2556735.70695326	3	0.383463	0.273593	0.552797	1.01714	0.337883	41.2498	36.1953	7	23	23	5	1	0	0.142233	0.415306	0.351335	0.289492
154	113.280259655028	23.0758207276225	733596.782456831	2553735.70695326	5	0.56689	0.782547	1.31435	0.181296	0.0573102	81.9446	13.9161	25	56	85	7	2	8	0.153137	0.628796	0.190036	0.126771
156	113.290168111047	23.0847056600052	734596.782456831	2554735.70695326	5	0.280037	0.857807	0.67849	0.882128	0.593187	81.9446	13.9161	28	53	150	17	3	9	0.298123	0.629231	0.13968	0.359332
157	113.337700392306	23.0117837824686	739596.782456831	2546735.70695326	5	0.659877	1.04478	4.04722	0.35038	0.364622	60.97	9.63692	6	46	91	16	0	10	0.25491	0.927003	0.073397	0.221536
159	113.233724495888	23.2119134564	728596.78245683	2568735.70695326	2	0.452454	0.179742	1.67944	1.87696	0.0671357	75.7477	6.80836	5	48	107	11	0	12	0.152931	0.158446	0.145689	0.1812
162	113.388843801836	23.1464382331587	744596.78245683	2561735.70695326	9	1.27712	1.29879	1.92358	1.03292	0.560198	92.7617	27.9773	0	1	0	0	0	0	0.746604	1.69929	0.898979	1.12859
163	113.252650613331	23.1755298746201	730596.782456829	2564735.70695326	1	0.182147	0.250727	0.735755	0.366474	0.430292	75.7477	6.80836	31	109	318	18	0	24	0.10169	0.988828	0.0940662	0.312796
168	113.262110089655	23.1573374723524	731596.782456829	2562735.70695326	4	0.0857142	0.170337	0.279917	0.255385	0.535897	96.5466	35.4904	20	97	141	12	9	7	0.137157	0.439173	0.145813	0.0486314
169	113.299463642064	23.0574856561585	735596.782456831	2551735.70695326	4	0.508773	0.541722	3.15704	0.307134	0.393633	81.9446	13.9161	0	19	7	0	2	0	0.203945	0.706198	0.161558	0.345791
170	113.318353500682	23.0210966659896	737596.782456831	2547735.70695326	7	0.250098	0.470583	2.691	1.08955	0.356576	60.97	9.63692	41	72	374	20	1	27	0.235518	0.510478	0.0654449	0.512322
171	113.320678102114	23.1564852977263	737596.782456831	2562735.70695326	9	0.273061	0.205406	0.646402	0.316935	0.498209	92.7617	27.9773	9	52	62	3	5	7	0.253659	0.321274	0.227985	0.333867
172	113.546016051073	23.1981387308969	760596.782456829	2567735.70695326	1	0.759382	1.91668	1.66688	1.61636	0.510913	41.2498	36.1953	1	4	4	0	0	0	0.254168	5.30292	0.574677	1.36861
175	113.438296160757	23.1817908530381	749596.782456829	2565735.70695326	30	1.17561	1.11683	2.18998	0.420267	0.172966	41.2498	36.1953	0	17	9	2	1	1	0.17168	0.791806	0.576188	0.789185
179	113.437642267059	23.1456906758724	749596.782456829	2561735.70695326	9	1.12745	1.20144	0.510427	0.660372	0.217307	92.7617	27.9773	5	12	64	4	0	3	0.130111	2.20035	0.272058	0.495363
180	113.566058152034	23.224893706148	762596.78245683	2570735.70695326	2	0.790052	0.563084	2.40212	2.20121	0.207126	41.2498	36.1953	0	3	1	0	0	0	0.199287	4.84312	1.2936	0.690995
183	113.221280258807	23.0495754764392	727596.78245683	2550735.70695326	1	0.292611	0.904714	2.40846	1.12691	0.682258	70.6313	10.8175	4	8	75	8	0	4	0.121065	1.97931	0.338043	0.187143
185	113.48727257892	23.190051571301	754596.782456831	2566735.70695326	64	0.454163	0.808736	1.54854	0.671159	1.1398	41.2498	36.1953	3	16	29	0	1	4	0.188948	0.910143	0.393284	0.414002
186	113.3321622443	23.2556238442144	738596.782456831	2573735.70695326	1	0.520877	0.437359	2.39261	0.903364	0.532334	75.7477	6.80836	0	2	9	1	0	0	0.916145	1.46086	0.739439	1.41172
187	113.271871617407	23.1571969530434	732596.78245683	2562735.70695326	1	0.232355	0.475321	0.266942	0.201308	0.0604198	96.5466	35.4904	16	79	59	5	4	10	0.0803772	0.303517	0.0898694	0.0803542
189	113.525305172085	23.135282591801	758596.782456831	2560735.70695326	11	0.288579	1.49469	6.10491	1.02932	0.468412	41.2498	36.1953	5	16	53	5	0	1	0.0186736	4.68839	0.212478	0.374728
190	113.445766214642	23.0552887692942	750596.782456829	2551735.70695326	2	0.488266	0.342007	1.76623	2.15289	0.311875	60.97	9.63692	0	0	3	2	0	0	1.47844	2.85614	0.975294	0.596322
191	113.398603657005	23.1462899285127	745596.78245683	2561735.70695326	3	0.842806	0.765953	1.19873	1.47888	0.797247	92.7617	27.9773	0	2	0	0	0	0	0.564641	0.835429	0.703743	0.562606
192	113.329503308784	23.1021863827344	738596.782456831	2556735.70695326	26	0.496072	0.447553	0.483311	0.601205	0.527423	81.9446	13.9161	10	33	32	6	8	5	0.0666314	0.519818	0.027659	0.0501931
193	113.204871845576	23.2394064399571	725596.78245683	2571735.70695326	2	0.256629	1.76259	2.9044	4.57703	0.0780221	75.7477	6.80836	1	4	3	0	0	0	0.742666	1.21386	0.142305	0.568672
195	113.514370022921	23.0722665715051	757596.782456831	2553735.70695326	4	0.228433	0.309859	1.77118	1.75396	0.523052	41.2498	36.1953	0	2	6	0	1	0	0.298131	1.22474	0.420363	0.84788
196	113.545674228808	23.1800901864419	760596.782456829	2565735.70695326	13	1.62814	1.92511	3.05768	1.75779	0.854049	41.2498	36.1953	0	0	0	0	0	0	0.961717	4.5384	1.61318	0.843995
197	113.233274434633	23.1848344820945	728596.78245683	2565735.70695326	2	0.385899	0.570317	1.19381	0.288579	0.136434	75.7477	6.80836	3	33	100	12	0	5	0.170857	0.649788	0.0848544	0.243727
200	113.319126419209	23.0662264922236	737596.782456831	2552735.70695326	2	0.368134	0.433994	0.924269	0.420074	0.281575	81.9446	13.9161	5	31	124	15	0	5	0.296449	1.22655	0.117381	0.446476
202	113.282705580745	23.2202380548615	733596.782456831	2569735.70695326	9	0.552842	0.859795	1.31537	0.963728	0.304933	75.7477	6.80836	8	30	85	4	1	4	0.33954	0.425599	0.209661	0.256999
204	113.26271726311	23.1934421580437	731596.782456829	2566735.70695326	3	0.108658	0.325858	0.839968	0.238272	0.428674	75.7477	6.80836	30	97	429	37	1	39	0.15084	0.153608	0.0561934	0.0441515
207	113.389645045864	23.1915650498527	744596.78245683	2566735.70695326	1	0.267017	0.259879	0.418277	0.531799	0.0364469	92.7617	27.9773	2	18	101	10	1	6	0.152231	0.606749	0.0561761	0.239806
208	113.477510197332	23.1902056399756	753596.782456831	2566735.70695326	5	0.547716	0.687323	2.15983	0.331095	0.980992	41.2498	36.1953	7	8	25	5	0	9	0.394398	0.396407	0.331802	0.471805
211	113.545005552531	23.1619204906443	760563.502530476	2563721.70519376	12	0.0661218	2.18638	4.91467	1.57741	0.844109	41.2498	36.1953	0	0	0	0	0	0	1.10199	4.54349	1.59053	1.38845
212	113.370596347796	23.2189368268518	742596.78245683	2569735.70695326	10	0.14859	1.90925	0.897878	1.83817	0.439451	92.7617	27.9773	0	3	6	3	0	1	0.221632	3.08921	0.472095	0.898437
213	113.232376343426	23.1306762294913	728596.78245683	2559735.70695326	8	0.0405636	0.231063	0.860571	0.248714	0.352973	70.6313	10.8175	18	65	110	9	4	5	0.241754	0.485391	0.278784	0.270636
215	113.349646181917	23.1379997646014	740596.78245683	2560735.70695326	21	0.16019	0.231947	0.0321042	0.0333539	0.540558	92.7617	27.9773	9	68	32	1	4	0	0.228784	0.497128	0.199294	0.296694
216	113.428208214265	23.1638916364643	748596.782456829	2563735.70695326	18	0.435116	0.48485	0.819388	0.892196	0.287763	41.2498	36.1953	0	25	34	2	0	0	0.2184	0.255453	0.148501	0.115099
217	113.213449727783	23.1670574985548	726596.78245683	2563735.70695326	1	0.325815	0.519878	1.07874	1.12716	0.91889	75.7477	6.80836	9	11	8	3	1	0	0.116281	0.90565	0.237819	0.443829
220	113.312998884274	23.2917279417932	736571.668624216	2577703.40648112	6	0.554909	0.817471	1.24497	0.856496	0.488779	75.7477	6.80836	0	8	12	1	0	0	0.482199	1.26041	0.393079	0.306915
222	113.263173443881	23.2205205537819	731596.782456829	2569735.70695326	6	0.390547	0.403462	0.66284	0.927894	0.204267	75.7477	6.80836	6	29	121	13	2	4	0.0229555	0.82849	0.21136	0.244627
226	113.280869293878	23.1119253302171	733596.782456831	2557735.70695326	60	0.227351	0.238852	0.37126	0.339285	0.598654	96.5466	35.4904	32	72	96	7	7	15	0.173634	0.717223	0.274457	0.259124
227	113.349961057903	23.1560510582169	740596.78245683	2562735.70695326	34	0.0547465	0.459106	0.0424226	0.167754	0.740482	92.7617	27.9773	7	32	27	5	11	3	0.408083	0.387368	0.419615	0.441883
228	113.553449033305	23.1259269109115	761498.252827014	2559749.54488886	12	0.468519	1.22259	6.1129	0.290934	0.181948	41.2498	36.1953	0	3	3	0	0	0	0.341663	2.30648	0.489863	0.833859
229	113.553333515675	23.1165439989241	761504.618617041	2558709.91749717	14	0.112531	1.14878	6.04932	1.32361	0.258901	41.2498	36.1953	6	18	74	7	1	3	0.163624	1.7292	0.228326	0.165743
230	113.232825050681	23.1577554064258	728596.78245683	2562735.70695326	2	0.156087	0.261942	1.36117	0.742298	0.205188	75.7477	6.80836	29	79	157	17	2	13	0.171969	0.282483	0.064547	0.123855
231	113.312937317893	23.2739644011724	736596.782456831	2575735.70695326	4	1.18437	0.779562	1.80773	1.1229	0.707004	75.7477	6.80836	1	6	24	0	0	0	0.437585	1.10313	0.690602	0.869632
236	113.329347606865	23.0931605477448	738596.782456831	2555735.70695326	27	0.11701	1.24896	0.657618	0.246402	0.363458	81.9446	13.9161	47	101	155	12	1	14	0.193994	0.562398	0.162592	0.19806
238	113.4966997595	23.1718476520869	755596.782456831	2564735.70695326	1	0.627562	0.112905	3.43269	0.502607	0.786368	41.2498	36.1953	4	26	80	4	2	12	0.156703	0.39842	0.23071	0.215766
240	113.291087397603	23.1388620596834	734596.782456831	2560735.70695326	28	0.0734646	0.416578	0.585207	0.524732	0.505517	96.5466	35.4904	38	141	132	14	5	12	0.245495	0.544231	0.186424	0.223741
241	113.280564321118	23.0938730514512	733596.782456831	2555735.70695326	18	0.151513	0.313812	0.0526744	0.134015	0.62897	81.9446	13.9161	26	111	94	11	4	8	0.167515	0.139875	0.186301	0.17516
242	113.317582526921	22.9759665580445	737596.782456831	2542735.70695326	3	0.0950808	0.17928	1.64156	2.10247	0.781177	60.97	9.63692	13	49	224	16	5	28	0.22789	1.09773	0.0147734	0.151589
243	113.357515282122	23.0295459835776	741596.78245683	2548735.70695326	1	0.816552	0.701283	1.52218	2.01603	0.936526	60.97	9.63692	3	10	0	0	0	0	0.695883	1.71994	0.501749	0.716438
245	113.308909752391	23.0392913596722	736596.782456831	2549735.70695326	1	0.176198	0.742468	3.26314	0.656547	0.816205	60.97	9.63692	10	38	73	11	2	6	0.070145	1.11613	0.172601	0.0463545
246	113.299617082573	23.0665117230552	735596.782456831	2552735.70695326	14	0.472193	0.738239	2.55163	1.30048	0.315474	81.9446	13.9161	23	91	186	12	0	15	0.202164	0.207786	0.0526376	0.0826941
247	113.378287890271	23.1014585126084	743596.78245683	2556735.70695326	33	0.162948	0.197622	1.0362	0.343581	1.11621	81.9446	13.9161	4	32	24	5	0	6	0.198858	0.67941	0.0960119	0.0800147
248	113.328880970831	23.0660829749556	738596.782456831	2552735.70695326	1	0.210354	0.465526	0.540525	1.30688	0.587109	81.9446	13.9161	0	3	0	0	0	0	0.529144	1.51208	0.737316	1.2521
250	113.318507928714	23.0301226537879	737596.782456831	2548735.70695326	1	0.59935	1.03247	3.16067	0.798849	0.262643	60.97	9.63692	17	45	49	6	1	14	0.120724	0.895287	0.227397	0.213609
251	113.535063215321	23.1351259091337	759596.782456829	2560735.70695326	19	1.288	0.752638	6.90151	0.645244	0.145098	41.2498	36.1953	3	17	25	2	0	4	0.349338	4.39599	0.25697	0.382185
252	113.298238896337	22.9852767156781	735596.782456831	2543735.70695326	2	0.708426	1.07026	3.17299	1.53225	0.837228	60.97	9.63692	0	0	0	0	0	0	0.525727	0.530376	0.879716	0.925827
253	113.329191983249	23.0841347014494	738596.782456831	2554735.70695326	11	0.362509	1.06084	0.455347	0.82674	0.263315	81.9446	13.9161	29	85	164	15	0	19	0.0165229	0.96571	0.218354	0.209269
254	113.263477946014	23.2385727611099	731596.782456829	2571735.70695326	1	0.727477	0.984951	1.01075	0.862774	0.602116	75.7477	6.80836	2	11	22	2	0	0	0.283509	1.33688	0.274566	0.408421
256	113.273551484216	23.2564837323113	732596.78245683	2573735.70695326	1	0.216067	0.231464	1.55361	1.66192	0.159452	75.7477	6.80836	4	33	125	10	2	12	0.116705	0.818726	0.0380397	0.0590117
258	113.338479405972	23.0569130390465	739596.782456831	2551735.70695326	2	0.193082	0.415337	1.92833	2.36405	0.494759	81.9446	13.9161	1	4	8	0	0	0	0.656216	1.97626	0.490649	1.07518
260	113.456503287524	23.109287596176	751596.78245683	2557735.70695326	3	0.541321	0.405284	1.08457	0.252751	1.02647	41.2498	36.1953	20	61	55	8	9	3	0.22707	0.352244	0.325506	0.143252
261	113.367266923493	23.0294003157173	742596.78245683	2548735.70695326	2	0.934322	0.897098	0.96634	1.24575	0.0673864	60.97	9.63692	0	0	10	4	1	1	0.32179	1.41011	0.922554	1.39249
262	113.273967195722	23.300607744893	732562.629280104	2578623.72638021	2	0.461295	0.709755	2.86944	0.800972	0.756784	75.7477	6.80836	0	0	2	0	1	0	0.749559	2.16428	1.27407	1.16752
263	113.36837282798	23.0925797087724	742596.78245683	2555735.70695326	1	0.499407	0.325719	0.51129	0.590459	0.586317	81.9446	13.9161	3	49	46	5	4	8	0.518132	0.616995	0.339126	0.384209
265	113.476016558575	23.1089824673314	753596.782456831	2557735.70695326	5	0.176434	0.460254	0.549132	0.761245	0.177752	41.2498	36.1953	4	6	18	0	1	0	0.204274	0.892177	0.217624	0.671114
266	113.337544824925	23.0027578972956	739596.782456831	2545735.70695326	24	0.556491	0.500902	3.07062	1.02346	0.81821	60.97	9.63692	0	11	0	0	0	0	0.485962	0.591478	0.436243	0.508315
268	113.533877086506	23.0719547597083	759596.782456829	2553735.70695326	5	1.07619	0.758052	0.814687	0.323045	0.214348	41.2498	36.1953	1	6	1	0	1	0	0.474257	0.843999	0.777152	0.509497
270	113.495696425095	23.1176996386639	755596.782456831	2558735.70695326	1	1.15137	1.75902	2.55124	2.58795	0.957668	41.2498	36.1953	0	2	0	0	0	0	1.08022	2.4757	1.59151	1.76758
271	113.339260383041	23.1020420131421	739596.782456831	2556735.70695326	8	0.507411	0.58272	0.58202	0.18329	0.57026	81.9446	13.9161	9	58	25	4	3	1	0.13597	0.408065	0.316037	0.298715
272	113.33231935966	23.2646494750728	738596.782456831	2574735.70695326	3	0.396483	0.304143	2.49177	0.0785408	0.0872249	75.7477	6.80836	2	17	97	13	0	5	0.269961	1.6423	0.12467	0.672048
273	113.376543775475	23.0021771865626	743596.78245683	2545735.70695326	11	1.06597	0.435439	1.64927	0.554218	0.732996	60.97	9.63692	2	16	9	1	4	1	0.398188	1.82319	0.132613	0.336446
275	113.330751745819	23.174392655201	738596.782456831	2564735.70695326	11	0.492649	1.01509	0.773911	1.1979	0.252304	92.7617	27.9773	17	46	80	2	0	7	0.0913331	0.333192	0.231891	0.220273
279	113.232226924615	23.1216498146932	728596.78245683	2558735.70695326	2	0.0772949	0.0915351	0.556524	0.328318	0.794676	70.6313	10.8175	16	63	76	5	11	13	0.234194	0.426948	0.0942905	0.401994
280	113.289556793082	23.0486011681039	734596.782456831	2550735.70695326	3	1.49394	1.00255	3.90079	1.04441	0.257464	81.9446	13.9161	3	7	38	6	1	1	0.250856	1.12099	0.380018	0.466571
281	113.332476553767	23.2736750945558	738596.782456831	2575735.70695326	16	0.787314	0.695657	2.66725	1.0239	0.0471356	75.7477	6.80836	1	11	36	6	0	0	0.103488	1.00915	0.242878	0.572849
284	113.350276250373	23.1741023064411	740596.78245683	2564735.70695326	30	0.353326	0.0540705	1.00727	0.425874	0.148395	92.7617	27.9773	7	66	215	11	3	7	0.355749	0.421154	0.00669852	0.137894
286	113.292779969582	23.2381477360668	734596.782456831	2571735.70695326	13	0.941129	0.408528	1.24939	1.08473	0.534486	75.7477	6.80836	3	19	51	7	0	2	0.273389	0.344083	0.26668	0.545143
288	113.447401715279	23.1455393543002	750596.782456829	2561735.70695326	4	1.05522	1.09533	0.961645	0.322003	0.121934	92.7617	27.9773	0	6	1	0	1	0	0.141306	1.37824	0.897579	0.500296
290	113.369641495911	23.1647840490196	742596.78245683	2563735.70695326	9	0.995305	1.13198	0.152034	0.822164	0.654727	92.7617	27.9773	0	1	3	0	1	0	0.527661	2.23041	0.786445	0.633754
291	113.234626652739	23.2660711005313	728596.78245683	2574735.70695326	1	0.276531	1.12232	1.24705	1.49133	0.224886	75.7477	6.80836	0	0	1	0	1	0	0.178537	3.63509	0.762173	0.863128
292	113.33832344626	23.0478872103148	739596.782456831	2550735.70695326	1	0.497262	0.380047	2.77612	2.67457	0.586812	81.9446	13.9161	3	16	2	1	0	0	0.390405	1.19714	0.804513	1.26068
294	113.486771989053	23.1629774839213	754596.782456831	2563735.70695326	19	0.814314	0.862145	2.77769	0.792213	0.802009	41.2498	36.1953	2	7	55	4	0	0	0.042452	1.44975	0.165402	0.990597
295	113.544140270125	23.0988711660884	760596.782456829	2556735.70695326	9	0.313418	0.500867	3.96807	0.636317	0.232471	41.2498	36.1953	5	22	32	9	0	4	0.208729	0.360819	0.0923537	0.272086
297	113.378446925452	23.1104840196742	743596.78245683	2557735.70695326	21	0.764156	0.223882	1.07185	1.06894	1.13179	81.9446	13.9161	1	1	3	1	0	0	0.571713	0.956104	0.485221	0.539559
299	113.349174460935	23.1109227391335	740596.78245683	2557735.70695326	15	0.803578	0.501366	1.0034	0.846115	0.531535	81.9446	13.9161	3	10	3	0	0	0	0.0238377	0.730476	0.516455	0.542938
300	113.242586805965	23.1576166990626	729596.782456829	2562735.70695326	3	0.332903	0.305733	1.10776	0.602624	0.53275	70.6313	10.8175	13	16	8	2	1	2	0.35273	0.702688	0.3915	0.63323
301	113.2033916496	23.1491413441718	725596.78245683	2561735.70695326	2	0.419145	0.833128	1.93717	0.734991	0.773955	75.7477	6.80836	18	36	131	9	2	5	0.169131	0.876524	0.152419	0.0782634
303	113.581460112751	23.2182280824116	764186.802083117	2570025.23598449	1	1.67084	2.17739	2.37918	2.64224	0.137858	41.2498	36.1953	0	1	0	0	0	0	0.804815	6.56773	1.12943	1.88138
308	113.416991084504	23.0828148452941	747596.78245683	2554735.70695326	4	0.112651	1.10033	1.23804	0.776536	0.571449	81.9446	13.9161	0	0	0	0	1	0	0.194746	1.45519	0.671379	0.821809
309	113.225006927854	23.2752362185394	727596.78245683	2575735.70695326	12	0.643542	1.00291	0.762942	1.37937	0.16026	75.7477	6.80836	15	16	61	7	0	2	0.231903	4.25074	0.378173	0.374584
310	113.213301314874	23.1580310090741	726596.78245683	2562735.70695326	7	0.196533	0.176244	0.607414	0.498044	0.692692	75.7477	6.80836	6	31	93	13	0	4	0.184568	0.545806	0.30278	0.22845
311	113.341300133114	23.2193760204824	739596.782456831	2569735.70695326	1	0.705912	1.07566	1.53258	1.13024	1.11133	75.7477	6.80836	5	2	2	0	0	0	0.359377	2.84216	1.21697	0.645084
312	113.377018485419	23.0292540477735	743596.78245683	2548735.70695326	1	0.755536	0.926158	0.943582	0.971513	0.931509	60.97	9.63692	0	0	2	0	0	0	0.966025	1.68233	0.929554	1.00068
313	113.467251062221	23.1632846167157	752596.782456831	2563735.70695326	39	0.877327	0.330902	1.17202	0.37086	0.805429	41.2498	36.1953	2	16	123	5	2	16	0.26891	0.10423	0.276953	0.104798
314	113.457820197919	23.1814870796483	751596.78245683	2565735.70695326	15	0.846656	1.01939	1.06839	0.899254	1.04895	41.2498	36.1953	1	3	1	0	0	0	0.510164	0.621469	0.639829	0.593071
315	113.358301571185	23.0746744957884	741596.78245683	2553735.70695326	1	0.558395	0.812128	1.31968	1.40452	0.502873	81.9446	13.9161	1	6	13	0	0	1	0.652229	1.19409	0.560528	0.656605
317	113.27248140547	23.1933013946329	732596.78245683	2566735.70695326	1	0.416664	0.468426	1.1278	0.590477	0.232814	75.7477	6.80836	10	72	173	8	4	10	0.028962	0.437244	0.0145819	0.0346427
318	113.347607189318	23.0206652517147	740596.78245683	2547735.70695326	4	0.352324	0.724455	2.93165	1.39672	0.502893	60.97	9.63692	8	5	23	2	0	0	0.0777338	1.7475	0.37584	0.0746535
319	113.534384916233	23.0990281783938	759596.782456829	2556735.70695326	3	0.549453	0.499677	3.73928	1.05623	0.431981	41.2498	36.1953	1	9	17	2	0	1	0.33946	0.814726	0.527424	0.70774
322	113.24183607496	23.1124849823133	729596.782456829	2557735.70695326	3	0.167288	0.150072	0.41932	0.671752	0.555294	70.6313	10.8175	47	82	290	16	7	24	0.107394	0.223142	0.0521308	0.172523
324	113.269444690554	23.0127773836939	732596.78245683	2546735.70695326	5	0.949564	0.995969	2.45816	2.97764	0.784115	60.97	9.63692	0	2	0	0	0	0	0.376736	0.323027	0.996532	1.32576
325	113.204723491523	23.2303799809931	725596.78245683	2570735.70695326	1	1.02003	0.89747	2.02494	3.65953	0.0938209	75.7477	6.80836	2	7	8	0	0	0	0.249946	0.621977	0.139357	0.692763
329	113.338947756418	23.0839904574311	739596.782456831	2554735.70695326	3	0.415181	0.690871	0.121993	0.0777374	0.411507	81.9446	13.9161	7	36	152	13	3	12	0.131377	0.28657	0.167813	0.686627
330	113.428860150592	23.1999919841427	748596.782456829	2567735.70695326	2	0.208199	0.917108	2.84933	1.13561	1.18009	41.2498	36.1953	3	14	39	7	0	3	0.135066	1.31414	0.379955	0.424745
332	113.35972188536	23.1559051041115	741596.78245683	2562735.70695326	1	0.415837	0.549889	0.297772	0.276948	0.588157	92.7617	27.9773	2	20	20	1	0	0	0.433815	0.857168	0.342485	0.490884
333	113.254469759985	23.2838438480642	730596.782456829	2576735.70695326	2	0.469856	0.565327	1.17971	1.38012	0.474161	75.7477	6.80836	0	2	0	0	0	0	0.619502	3.68261	1.31023	1.33564
335	113.283473969989	23.2653678762003	733596.782456831	2574735.70695326	2	0.899474	1.02253	1.24986	1.5108	0.0606223	75.7477	6.80836	0	7	44	5	0	1	0.0529569	0.62578	0.132615	0.997579
336	113.37908386626	23.1465859343586	743596.78245683	2561735.70695326	19	0.491527	0.299384	1.53055	0.339302	0.165735	92.7617	27.9773	6	24	8	0	1	0	0.242043	2.00661	1.02361	0.502126
337	113.409333005788	23.2002923915365	746596.78245683	2567735.70695326	16	0.849267	1.12147	1.58644	1.50674	1.07976	92.7617	27.9773	0	0	0	0	0	0	0.962026	1.02924	0.879824	0.928545
338	113.446746527934	23.1094392572245	750596.782456829	2557735.70695326	18	0.164331	0.0177415	0.887552	0.992961	0.851285	41.2498	36.1953	13	24	98	8	4	5	0.285523	0.636933	0.303907	0.3858
339	113.388204254091	23.1103365749905	744596.78245683	2557735.70695326	14	0.286519	0.805836	1.79274	1.15958	0.680222	81.9446	13.9161	2	3	1	0	0	0	0.208493	0.593675	0.764044	0.736847
340	113.476513687976	23.1360569612962	753596.782456831	2560735.70695326	2	0.477328	0.938277	3.45319	2.23176	0.542686	41.2498	36.1953	0	2	0	0	0	0	0.212797	2.12476	1.26635	1.19554
341	113.254621850051	23.2928699390366	730596.782456829	2577735.70695326	2	1.22924	0.823799	1.98677	0.636962	0.566759	75.7477	6.80836	0	2	16	2	1	0	0.10726	3.94471	0.623572	0.568396
342	113.322393979178	23.2557686757912	737596.782456831	2573735.70695326	6	0.480944	0.565747	1.51385	0.175847	0.153564	75.7477	6.80836	10	17	84	8	0	2	0.157472	0.599005	0.184676	0.416103
343	113.234325632195	23.2480185976293	728596.78245683	2572735.70695326	4	0.712811	1.18815	2.02395	2.12551	0.446324	75.7477	6.80836	1	1	12	1	0	1	0.391534	2.11699	0.210213	0.98905
344	113.23554913852	23.3109789314911	728614.413396725	2579711.24808361	2	2.02559	0.136911	3.63043	2.12862	0.631564	75.7477	6.80836	0	1	5	1	0	0	0.131738	4.70122	0.904826	0.104184
345	113.359089841154	23.1198027249249	741596.78245683	2558735.70695326	12	0.381161	0.777037	0.154734	0.21885	0.449585	92.7617	27.9773	42	111	237	12	8	13	0.0968245	0.583502	0.0467931	0.268666
346	113.553500936788	23.1345690506959	761486.799009004	2560706.99783681	12	1.28235	0.680645	6.32926	0.679838	0.487816	41.2498	36.1953	7	3	0	0	0	0	0.246083	3.06528	0.895928	0.820203
347	113.476679564402	23.1450817697228	753596.782456831	2561735.70695326	3	0.912608	0.808394	3.40673	1.45073	0.735103	41.2498	36.1953	0	0	0	0	0	0	0.788046	1.70698	1.39017	1.32183
349	113.292934303476	23.2471736387283	734596.782456831	2572735.70695326	8	0.584212	0.803132	0.56729	0.612952	0.118205	75.7477	6.80836	0	14	58	9	1	2	0.180222	1.10211	0.230393	0.510326
351	113.418771795027	23.1820922088591	747596.78245683	2565735.70695326	94	1.3182	0.64954	1.47563	0.390034	0.215551	92.7617	27.9773	1	21	2	0	1	0	0.311804	1.22525	0.807052	0.863648
352	113.407557682249	23.1010145644918	746596.78245683	2556735.70695326	38	0.662643	0.781429	1.76681	0.421821	0.8602	81.9446	13.9161	0	3	0	0	0	0	0.712919	0.895243	0.726197	0.71996
353	113.224257847641	23.230104632858	727596.78245683	2570735.70695326	4	0.140058	0.724077	1.87228	3.29982	0.415273	75.7477	6.80836	1	10	12	2	0	0	0.24783	0.876923	0.459742	0.571121
355	113.366794156573	23.0023232632144	742596.78245683	2545735.70695326	10	0.743727	1.18698	2.64556	0.810024	0.563673	60.97	9.63692	2	1	1	0	0	0	0.754596	1.4635	0.506864	0.770516
356	113.3194361318	23.0842783437354	737596.782456831	2554735.70695326	5	0.232991	0.897168	1.05258	0.157682	0.258824	81.9446	13.9161	22	92	162	24	3	9	0.145507	0.638689	0.10471	0.252493
358	113.293766309218	23.2996346525209	734589.972490054	2578547.89731665	2	0.788187	0.469859	0.973126	2.51089	0.523785	75.7477	6.80836	0	3	0	0	0	0	0.553893	1.35516	0.618006	0.774062
359	113.309217699702	23.0573434033401	736596.782456831	2551735.70695326	18	0.320133	0.458294	2.32482	0.997151	0.454498	81.9446	13.9161	1	27	37	4	0	1	0.230672	0.967354	0.693503	0.509485
360	113.565368587084	23.188797259871	762596.78245683	2566735.70695326	12	0.307171	0.544561	1.70647	0.132684	0.178711	41.2498	36.1953	5	10	132	10	0	4	0.28352	6.72432	0.194353	0.306183
363	113.281021895317	23.1209514526923	733596.782456831	2558735.70695326	20	0.307804	0.1197	0.62169	0.357479	0.453366	96.5466	35.4904	71	161	145	8	14	25	0.152298	0.410534	0.0839063	0.116917
364	113.242887626824	23.1756693069707	729596.782456829	2564735.70695326	3	0.338958	0.22997	1.22324	0.88976	0.0771729	75.7477	6.80836	19	32	120	7	0	5	0.283728	0.667553	0.250175	0.511401
367	113.290474231768	23.1027578383503	734596.782456831	2556735.70695326	16	0.425905	0.376873	0.329615	0.338525	0.448181	96.5466	35.4904	48	137	68	14	0	11	0.105832	0.192501	0.237737	0.14604
369	113.320833699781	23.1655111160584	737596.782456831	2563735.70695326	3	0.322598	0.723823	0.391287	0.456191	0.329685	92.7617	27.9773	30	78	192	6	2	8	0.345853	0.625682	0.194776	0.163971
370	113.279955295425	23.05776835876	733596.782456831	2551735.70695326	4	0.71634	1.17498	2.79987	1.4249	0.381784	70.6313	10.8175	0	3	4	0	0	0	0.871369	0.488556	0.694125	0.848586
373	113.407396775332	23.0919892391606	746596.78245683	2555735.70695326	1	0.447186	0.469464	1.18697	0.727262	0.221594	81.9446	13.9161	0	11	9	0	2	1	0.272678	1.59874	0.387287	0.439821
374	113.551988331058	23.1435330156469	761314.439739488	2561697.29439942	1	1.799	1.25402	6.73131	0.716663	0.848775	41.2498	36.1953	1	1	0	0	0	0	0.526436	4.01224	1.1894	1.43666
376	113.419096618958	23.2001424903183	747596.78245683	2567735.70695326	25	0.874576	0.425574	2.07791	0.941732	1.22875	92.7617	27.9773	1	2	10	1	0	0	0.438195	1.33228	0.644994	0.575257
377	113.300385444368	23.1116418884049	735596.782456831	2557735.70695326	1	0.552253	0.465046	0.286423	0.746103	0.995351	96.5466	35.4904	6	38	9	2	6	1	0.0955103	0.478237	0.442066	0.242479
378	113.523786767728	23.0540618269727	758596.782456831	2551735.70695326	1	1.40655	0.267948	0.661029	0.46267	0.243049	41.2498	36.1953	5	32	40	3	0	1	0.251916	0.244596	0.187118	0.217576
381	113.300847389672	23.1387198521762	735596.782456831	2560735.70695326	35	0.284905	0.391726	0.445187	0.077913	0.311748	96.5466	35.4904	19	65	47	1	10	2	0.262886	0.288563	0.199487	0.175362
382	113.467582092466	23.1813342864166	752596.782456831	2565735.70695326	29	0.937484	0.515824	1.14562	1.06573	1.32762	41.2498	36.1953	0	0	1	0	1	0	0.649586	1.10733	0.686487	1.09755
384	113.506124579971	23.153643351672	756596.782456831	2562735.70695326	33	0.704985	0.786868	5.0088	0.0479339	0.203706	41.2498	36.1953	1	34	20	1	1	0	0.0727943	2.08988	0.109794	0.128895
385	113.341457589014	23.2284016339003	739596.782456831	2570735.70695326	3	0.764972	1.08186	0.870437	0.259648	0.464039	75.7477	6.80836	4	10	9	2	0	1	0.379562	3.42623	0.32838	0.323605
386	113.300231617366	23.1026158778983	735596.782456831	2556735.70695326	38	0.0798637	0.0826217	0.0529255	0.0855835	0.136947	96.5466	35.4904	14	56	42	6	4	1	0.211031	0.873161	0.134413	0.0669334
387	113.293243203445	23.265225410041	734596.782456831	2574735.70695326	1	0.297936	0.0592932	0.691365	0.727867	0.309067	75.7477	6.80836	7	37	143	8	0	16	0.149051	1.43042	0.0314285	0.0730546
388	113.386127869486	22.9934983835182	744595.203539173	2544790.35382378	4	0.798623	0.956468	0.998526	1.03375	0.223232	60.97	9.63692	0	2	6	0	0	0	0.344383	2.50019	0.933501	1.03725
390	113.243038150585	23.1846955940263	729596.782456829	2565735.70695326	15	0.650218	0.587661	1.01267	0.720028	0.0680802	75.7477	6.80836	6	31	41	3	0	1	0.278485	0.393009	0.483231	0.110742
391	113.397000689222	23.0560360859501	745596.78245683	2551735.70695326	2	0.248329	0.662738	0.225957	0.950265	0.803662	60.97	9.63692	0	17	37	1	0	1	0.151222	1.02716	0.366059	0.87679
392	113.283627879056	23.2743938064782	733596.782456831	2575735.70695326	8	0.121086	0.902748	1.08719	1.59002	0.348092	75.7477	6.80836	0	1	1	0	0	0	0.498436	1.56792	0.942932	1.34196
393	113.466589998442	23.1271851399133	752596.782456831	2559735.70695326	7	0.605051	0.792259	2.52697	2.38165	0.634925	41.2498	36.1953	0	8	0	0	0	0	0.491744	1.22877	0.743875	1.06766
396	113.464788691745	23.0459975591049	752564.036000071	2550739.24493905	4	1.1163	1.21185	2.88407	1.9115	1.20263	60.97	9.63692	2	7	5	0	0	0	0.125329	4.49674	0.00237112	0.0800412
398	113.565713196601	23.2068455061282	762596.78245683	2568735.70695326	2	0.928029	0.62023	0.584044	0.664463	0.273428	41.2498	36.1953	0	6	0	0	0	0	0.2579	6.16167	0.892439	0.991189
399	113.282398764125	23.2021860470842	733596.782456831	2567735.70695326	4	0.396613	0.415921	0.599119	0.674992	0.490945	75.7477	6.80836	3	12	47	1	1	3	0.0553134	0.387529	0.451777	0.282861
401	113.251594493614	23.112345973278	730596.782456829	2557735.70695326	4	0.0278077	0.290779	0.580409	0.239188	0.22875	70.6313	10.8175	50	42	199	26	8	13	0.0986285	0.40464	0.0993847	0.151477
403	113.48560687545	23.0998042120985	754596.782456831	2556735.70695326	2	0.992398	0.77502	0.666589	1.72293	0.438981	41.2498	36.1953	4	9	34	1	0	0	0.369725	0.239638	0.377456	0.882748
404	113.342246053711	23.2735295303827	739596.782456831	2575735.70695326	7	1.01819	0.85668	1.76964	1.48313	0.349101	75.7477	6.80836	0	1	5	0	0	0	0.29145	1.97089	0.772074	1.16414
406	113.409171207186	23.1912671915395	746596.78245683	2566735.70695326	4	0.649766	0.155439	0.66833	0.507411	0.151348	92.7617	27.9773	2	10	38	3	1	0	0.136409	0.0871499	0.0208861	0.0271617
407	113.300693330498	23.1296938755475	735596.782456831	2559735.70695326	9	0.0750806	0.383523	0.323693	0.263816	0.259127	96.5466	35.4904	41	123	89	10	12	3	0.204105	0.418941	0.0853434	0.0737301
409	113.386769967574	23.0291071797658	744596.78245683	2548735.70695326	2	0.381213	1.43537	0.972531	1.52833	1.36388	60.97	9.63692	3	3	0	0	0	0	0.462671	1.28421	0.582543	0.576012
415	113.269898251877	23.0398562722845	732596.78245683	2549735.70695326	2	0.918705	0.700466	3.77989	1.32344	0.337622	60.97	9.63692	1	4	28	5	0	0	0.0868146	0.966631	0.666169	0.870647
419	113.244245063591	23.2569054844327	729596.782456829	2573735.70695326	7	0.800449	0.781245	0.663842	1.69355	0.0922076	75.7477	6.80836	2	5	28	1	1	0	0.138367	3.51552	0.634705	0.611024
420	113.388523867245	23.1283874268144	744596.78245683	2559735.70695326	16	0.148611	0.433549	0.983248	0.918866	0.181208	92.7617	27.9773	28	65	320	14	1	22	0.294141	0.280183	0.0256997	0.148573
421	113.376860169032	23.0202284386859	743596.78245683	2547735.70695326	10	0.240976	0.507994	1.93072	0.846179	0.150306	60.97	9.63692	0	2	15	2	0	2	0.822092	1.08572	0.159125	0.776462
424	113.308448412694	23.0122132096716	736596.782456831	2546735.70695326	7	0.0684147	0.0799241	1.55017	1.09461	0.193806	60.97	9.63692	4	30	83	13	0	5	0.219063	1.49041	0.152311	0.384374
429	113.418447297042	23.1640418817308	747596.78245683	2563735.70695326	2	0.469733	1.00957	0.196976	0.471737	0.163542	92.7617	27.9773	10	39	58	7	1	7	0.207095	1.23069	0.0762162	0.373879
430	113.252348485732	23.1574773876985	730596.782456829	2562735.70695326	2	0.137792	0.294564	0.118344	0.354629	0.610898	96.5466	35.4904	24	122	192	25	2	14	0.264775	0.344241	0.077959	0.0494581
431	113.515884096949	23.153487739715	757596.782456831	2562735.70695326	16	1.09859	0.69204	5.90778	0.408695	0.473777	41.2498	36.1953	0	0	2	0	1	0	0.425353	2.52997	0.705884	0.599211
432	113.282092255273	23.1841339940694	733596.782456831	2565735.70695326	9	0.1079	0.425532	1.61989	1.33936	1.21119	75.7477	6.80836	5	8	2	1	5	1	0.231074	0.522518	0.446567	1.15269
433	113.448058220573	23.181639268529	750596.782456829	2565735.70695326	26	0.247259	0.932609	1.72351	0.114906	0.433842	41.2498	36.1953	2	18	20	5	2	0	0.17867	0.311511	0.48801	0.665906
436	113.397640909054	23.0921377593661	745596.78245683	2555735.70695326	1	0.093949	0.130167	0.380101	1.18505	0.204288	81.9446	13.9161	15	30	67	5	6	9	0.233126	1.35122	0.035603	0.18921
437	113.298544620031	23.0033290182981	735596.782456831	2545735.70695326	1	0.414017	0.399268	1.25083	0.697927	0.519111	60.97	9.63692	1	3	6	0	0	0	0.472748	1.42633	0.657516	0.69666
438	113.211821281446	23.0677654968708	726596.78245683	2552735.70695326	1	0.549674	0.942621	0.665187	1.03926	0.744976	70.6313	10.8175	2	31	48	6	0	0	0.118667	0.164157	0.149178	0.478736
439	113.308755895012	23.0302653209349	736596.782456831	2548735.70695326	6	0.781796	0.404925	2.42894	0.169834	0.122427	60.97	9.63692	19	36	62	3	0	13	0.260191	1.50257	0.0833377	0.0718049
442	113.337389335941	22.9937320008453	739596.782456831	2544735.70695326	3	0.493344	0.805374	2.116	1.50605	1.12101	60.97	9.63692	15	28	98	3	3	12	0.383228	0.658465	0.147169	0.285079
444	113.310297959526	23.1205252008209	736596.782456831	2558735.70695326	2	0.54415	0.283731	1.08051	0.195816	0.191757	96.5466	35.4904	64	133	201	7	9	23	0.197971	0.211016	0.0638663	0.0639423
445	113.26914269706	22.9947247351689	732596.78245683	2544735.70695326	1	0.541752	0.516918	3.24744	1.49771	0.499061	60.97	9.63692	2	27	25	2	0	0	0.0526446	0.528602	0.103618	0.689487
446	113.224856961597	23.2662099239704	727596.78245683	2574735.70695326	7	0.130497	1.30149	1.04863	1.95558	0.402455	75.7477	6.80836	2	7	25	2	0	1	0.371527	3.2715	0.38511	0.542494
447	113.466095071953	23.1001104122033	752596.782456831	2556735.70695326	4	0.0358131	0.567758	0.873262	0.679557	1.09784	41.2498	36.1953	20	39	38	1	1	2	0.0323843	0.475324	0.189537	0.181192
448	113.312003207809	23.2198097633294	736596.782456831	2569735.70695326	1	0.293077	0.949935	1.72367	1.79617	0.543169	75.7477	6.80836	9	13	4	2	1	1	0.386704	0.548714	0.174903	0.530378
451	113.435850823358	23.0464142472819	749596.782456829	2550735.70695326	1	0.587865	1.15618	0.556403	1.8002	0.335276	60.97	9.63692	1	5	13	3	0	0	0.120501	2.85037	0.455517	1.20383
453	113.203539335008	23.1581679043217	725596.78245683	2562735.70695326	2	0.358293	0.234792	1.60311	0.399485	0.319514	75.7477	6.80836	15	26	83	3	1	3	0.253275	0.28085	0.322765	0.374643
454	113.338011762351	23.0298355189682	739596.782456831	2548735.70695326	5	0.838702	0.685239	3.26863	1.12179	0.776804	60.97	9.63692	6	17	8	3	0	2	0.324618	0.403622	0.318864	0.286037
455	113.308294787709	23.0031871371529	736596.782456831	2545735.70695326	4	0.261425	0.771451	1.91173	1.54399	0.641804	60.97	9.63692	5	18	4	1	0	4	0.214374	1.8233	0.229067	0.628374
456	113.340357055012	23.1652221014323	739596.782456831	2563735.70695326	10	0.300461	0.780997	0.0236315	0.161933	0.585689	92.7617	27.9773	3	35	18	2	1	3	0.397478	0.645699	0.433993	0.646823
461	113.221724990639	23.0766551362238	727596.78245683	2553735.70695326	6	0.316388	0.412948	0.773908	1.47876	0.397176	70.6313	10.8175	6	11	21	3	3	2	0.237174	1.09085	0.471501	0.225183
462	113.396042773853	23.0018832354408	745596.78245683	2545735.70695326	3	0.589207	0.514032	0.402876	1.44596	0.153546	60.97	9.63692	6	23	89	8	0	6	0.12297	1.80428	0.161692	0.214007
463	113.339729912929	23.1291192618171	739596.782456831	2559735.70695326	8	0.111705	0.766123	0.638778	0.418547	0.284319	92.7617	27.9773	27	167	508	17	4	23	0.270847	0.287249	0.119747	0.211203
465	113.350433965348	23.1831279135222	740596.78245683	2565735.70695326	22	0.839038	0.950401	0.249521	0.302146	0.54323	92.7617	27.9773	1	24	21	1	0	0	0.309407	0.493114	0.0517222	0.147936
470	113.320522582586	23.1474594680708	737596.782456831	2561735.70695326	18	0.586727	0.312646	0.457053	0.508369	0.794758	92.7617	27.9773	11	53	86	7	5	10	0.25847	0.521181	0.142085	0.23315
471	113.261958486778	23.1483112727322	731596.782456829	2561735.70695326	15	0.134425	0.104824	0.347123	0.318167	0.206873	96.5466	35.4904	21	86	45	12	6	7	0.228404	0.456508	0.0344634	0.0339836
474	113.417637476826	23.1189158643027	747596.78245683	2558735.70695326	4	0.239675	0.762164	1.93469	0.766295	0.357279	92.7617	27.9773	9	84	199	19	4	20	0.0702612	0.402597	0.036621	0.00278515
476	113.457161081128	23.145387429404	751596.78245683	2561735.70695326	7	0.423812	0.767421	1.89446	0.247163	0.115861	41.2498	36.1953	0	21	38	3	0	0	0.0882945	0.487466	0.10107	0.114226
478	113.437805617355	23.1547157373022	749596.782456829	2562735.70695326	1	1.04941	0.335486	0.927994	0.359289	0.203689	92.7617	27.9773	3	13	12	1	1	0	0.110173	1.27069	0.146593	0.868669
482	113.302392244236	23.2289789963667	735596.782456831	2570735.70695326	15	0.165867	0.602266	1.03749	1.46336	0.422987	75.7477	6.80836	51	65	181	12	0	19	0.12138	0.914009	0.0974734	0.152599
483	113.358774295269	23.1017514672686	741596.78245683	2556735.70695326	10	0.422769	0.373049	0.900891	1.08776	0.820189	81.9446	13.9161	0	5	8	1	8	1	0.313415	0.331328	0.398083	0.472492
484	113.378924510998	23.1375604727317	743596.78245683	2560735.70695326	38	0.709898	0.249298	1.01623	0.2865	0.283657	92.7617	27.9773	12	36	58	1	2	6	0.196672	1.27701	0.430375	0.54635
486	113.211673687181	23.0587388839902	726596.78245683	2551735.70695326	1	0.337072	0.710147	1.47526	0.28838	0.483647	70.6313	10.8175	5	8	11	4	0	1	0.49493	0.797486	0.434213	0.375876
487	113.25219753571	23.1484511273347	730596.782456829	2561735.70695326	1	0.134089	0.422669	0.954506	0.49816	0.5752	70.6313	10.8175	18	94	125	19	3	5	0.10451	0.101044	0.0804089	0.0990208
489	113.312625635661	23.2559129006365	736596.782456831	2573735.70695326	9	0.198367	0.653041	0.656357	0.366924	0.294556	75.7477	6.80836	30	17	225	9	0	6	0.411349	0.68012	0.204328	0.527631
490	113.261504134952	23.121232606256	731596.782456829	2558735.70695326	5	0.18345	0.234608	0.299209	0.20236	0.422547	96.5466	35.4904	88	88	166	13	8	12	0.158398	0.46907	0.118864	0.133312
491	113.427720120645	23.1368162558001	748596.782456829	2560735.70695326	41	0.498236	0.411234	1.24249	1.67269	0.111431	92.7617	27.9773	1	7	10	0	0	0	0.389124	2.18227	0.556307	0.699894
496	113.405782922879	23.0017442111863	746595.819907735	2545736.67173134	1	1.17853	1.05961	0.782479	1.72388	0.431966	60.97	9.63692	0	2	0	1	0	0	0.525966	2.41288	0.721112	0.722487
498	113.308602115121	23.0212392709334	736596.782456831	2547735.70695326	3	0.233241	0.616149	1.77521	0.17448	0.245849	60.97	9.63692	18	60	169	12	5	13	0.331023	1.40093	0.0755882	0.0955129
500	113.192523434276	23.0769967556559	724603.738742529	2553728.33770097	8	0.953546	1.03438	2.62355	0.963393	0.69924	70.6313	10.8175	4	3	44	6	0	2	0.10471	1.19528	0.117884	0.60966
501	113.436013272507	23.0554394341207	749596.782456829	2551735.70695326	1	0.289196	1.00637	1.51479	2.09916	1.23589	60.97	9.63692	0	0	0	0	0	0	1.09453	2.37961	1.26132	1.50548
502	113.348860375335	23.092871332168	740596.78245683	2555735.70695326	1	0.834777	1.01808	0.606152	0.536575	0.505325	81.9446	13.9161	1	12	3	0	1	0	0.691254	0.398761	0.45917	0.594487
503	113.535572835113	23.1621990864263	759596.782456829	2563735.70695326	4	0.413603	2.13739	5.29115	0.930929	0.813422	41.2498	36.1953	3	3	9	1	0	4	0.601806	3.60835	0.760475	0.623847
504	113.241986070263	23.1215113481605	729596.782456829	2558735.70695326	5	0.366545	0.373613	0.935804	0.205019	0.419153	70.6313	10.8175	51	91	169	21	13	14	0.159446	0.291259	0.0590113	0.261746
505	113.222319011767	23.1127611922928	727596.78245683	2557735.70695326	6	0.540626	0.54252	1.31101	1.05767	0.758176	70.6313	10.8175	2	8	4	0	7	2	0.762903	0.935727	0.542677	0.655383
507	113.327640048613	22.9938756174801	738596.782456831	2544735.70695326	6	0.167096	0.219571	2.18883	1.7027	0.977904	60.97	9.63692	2	20	21	4	1	19	0.160289	0.189219	0.257392	0.552064
508	113.310143403725	23.111499263625	736596.782456831	2557735.70695326	1	0.506884	0.296131	0.717732	0.709126	0.271294	96.5466	35.4904	14	53	22	3	7	3	0.362429	0.627377	0.209741	0.243726
510	113.389164058057	23.1644889939939	744596.78245683	2563735.70695326	7	0.674114	0.679651	1.75604	1.32394	0.449122	92.7617	27.9773	2	7	19	2	0	1	0.4283	1.39775	0.406195	0.745297
511	113.467913455214	23.1993839102776	752596.782456831	2567735.70695326	1	0.929204	2.0013	2.66563	1.64488	0.785651	41.2498	36.1953	0	1	0	0	0	0	0.423504	0.912232	1.55616	1.70868
513	113.262261768704	23.1663636606972	731596.782456829	2563735.70695326	5	0.196501	0.3431	0.495372	0.401908	0.316046	75.7477	6.80836	18	126	140	24	4	10	0.0391615	0.316105	0.273551	0.203048
519	113.446910201299	23.1184642986223	750596.782456829	2558735.70695326	3	0.770461	1.0139	1.85855	0.466828	0.235525	41.2498	36.1953	0	8	0	0	0	0	0.285454	1.63673	0.692338	0.522938
520	113.214937961083	23.257321774578	726596.78245683	2573735.70695326	5	0.35381	1.37927	1.45247	3.36841	0.0774171	75.7477	6.80836	1	3	36	1	0	3	0.454307	2.18905	0.308992	1.06218
522	113.455355327901	23.0461124484393	751596.78245683	2550735.70695326	7	0.35166	0.327194	1.94172	1.25672	0.668066	60.97	9.63692	2	5	55	4	2	2	0.297993	4.10787	0.206012	0.202975
523	113.312158697754	23.2288355646765	736596.782456831	2570735.70695326	11	0.90972	1.27576	1.86815	2.16843	0.797904	75.7477	6.80836	2	0	1	0	0	0	0.832194	1.09529	0.558012	1.03454
525	113.291240881777	23.147888086796	734596.782456831	2561735.70695326	23	0.190573	0.317374	0.198985	0.834012	0.314154	96.5466	35.4904	15	38	40	0	2	6	0.274181	0.695846	0.276364	0.36393
527	113.183327803293	23.0756160728605	723663.697816531	2553561.30603013	1	0.849525	1.9227	3.51792	0.408754	0.868515	70.6313	10.8175	0	2	0	0	0	0	0.592553	1.37432	0.586008	0.852388
528	113.272786758956	23.2113535476557	732596.78245683	2568735.70695326	13	0.359498	0.613007	0.365591	0.631326	0.0904935	75.7477	6.80836	15	34	161	18	2	7	0.0386262	0.643929	0.14915	0.222477
529	113.260446642481	23.0580486571865	731596.782456829	2551735.70695326	5	0.993362	0.449763	2.61981	1.78629	0.334809	70.6313	10.8175	2	3	26	5	1	0	0.15438	0.359538	0.204475	0.492522
530	113.546187090889	23.2071629858198	760596.782456829	2568735.70695326	5	0.470554	1.97209	1.57893	1.34704	0.485221	41.2498	36.1953	1	7	15	2	0	1	0.170093	5.06774	0.495198	0.961967
532	113.301001526282	23.1477458175051	735596.782456831	2561735.70695326	61	0.414802	0.579285	0.132099	0.535365	0.117389	96.5466	35.4904	15	60	39	2	1	0	0.181099	0.597679	0.108223	0.21187
537	113.44822255301	23.1906642184885	750596.782456829	2566735.70695326	29	0.218496	1.22375	2.43719	0.479371	0.671683	41.2498	36.1953	3	22	24	1	0	2	0.189252	1.07817	0.290564	0.498205
538	113.331377847891	23.2104955194201	738596.782456831	2568735.70695326	17	0.632493	0.340573	1.4471	0.956146	0.29327	75.7477	6.80836	11	30	44	6	1	5	0.394932	1.50344	0.19546	0.18496
539	113.283012705317	23.2382900173723	733596.782456831	2571735.70695326	1	0.475735	0.490856	1.18148	0.673631	0.159234	75.7477	6.80836	14	52	423	17	0	23	0.0944784	0.60436	0.0913121	0.0849279
541	113.347294680972	23.0026136186006	740596.78245683	2545735.70695326	2	0.918145	1.49881	2.98546	0.599728	0.904911	60.97	9.63692	9	52	143	16	0	19	0.178671	0.168515	0.245517	0.121132
543	113.309834525185	23.0934473553457	736596.782456831	2555735.70695326	5	0.332569	1.26533	0.297261	0.101005	0.224313	81.9446	13.9161	20	55	209	16	8	10	0.135853	0.177977	0.162729	0.226346
544	113.215236504368	23.2753744945881	726596.78245683	2575735.70695326	3	0.770573	0.457029	0.229577	2.34582	0.450313	75.7477	6.80836	3	7	49	3	0	5	0.271969	4.18465	0.186764	0.488136
545	113.389805536155	23.2005903790192	744596.78245683	2567735.70695326	6	1.04618	0.753157	0.313716	1.17114	0.43135	92.7617	27.9773	4	16	68	2	1	0	0.268457	1.00094	0.272706	0.512198
547	113.329659089028	23.1112122064145	738596.782456831	2557735.70695326	6	0.336736	0.456235	1.37764	0.99904	0.951418	81.9446	13.9161	6	26	44	3	1	10	0.269458	0.56763	0.136438	0.303764
548	113.347138544895	22.9935877851137	740596.78245683	2544735.70695326	3	0.165545	0.776793	1.99041	0.616483	0.44449	60.97	9.63692	10	40	159	10	2	8	0.423312	0.96749	0.0885346	0.379795
551	113.428697043776	23.1909669143636	748596.782456829	2566735.70695326	6	0.0634654	0.7857	2.45938	0.661689	0.609013	41.2498	36.1953	3	18	24	0	0	1	0.235728	0.48406	0.355805	0.440063
553	113.302547156484	23.2380048484959	735596.782456831	2571735.70695326	4	0.574194	0.77173	1.4096	1.42845	0.345778	75.7477	6.80836	14	29	36	8	0	4	0.320965	1.34028	0.0318231	0.778383
556	113.361466566008	23.2551857092925	741596.78245683	2573735.70695326	1	0.258955	0.48922	0.420883	3.22767	0.419843	75.7477	6.80836	1	14	55	9	0	5	0.538134	4.41135	0.0997644	0.549524
557	113.357986818016	23.0566231248472	741596.78245683	2551735.70695326	5	0.214624	0.2498	1.6851	1.28731	0.473456	81.9446	13.9161	0	16	28	5	4	5	0.229734	2.18192	0.0442813	0.476353
560	113.347450895772	23.0116394408022	740596.78245683	2546735.70695326	7	0.249575	1.54234	3.67272	0.47456	0.258565	60.97	9.63692	9	65	276	13	2	16	0.0829535	0.748478	0.196803	0.360326
562	113.211618334885	23.049793876331	726606.092704961	2550744.88946581	3	1.00768	0.961335	2.42006	0.792088	0.473271	70.6313	10.8175	0	7	25	2	0	0	0.356549	1.78283	0.795133	0.557282
569	113.293397769566	23.2742512786849	734596.782456831	2575735.70695326	3	0.597403	0.435375	0.312761	0.706836	0.17918	75.7477	6.80836	4	16	33	5	2	3	0.161691	1.70687	0.257991	0.412399
570	113.330908153509	23.1834183882731	738596.782456831	2565735.70695326	2	0.330141	0.0644673	0.247988	0.616778	0.178425	75.7477	6.80836	17	93	201	8	4	5	0.221851	0.536647	0.144381	0.112258
572	113.45699650874	23.1363624882424	751596.78245683	2560735.70695326	1	0.311149	0.622554	1.90393	1.08715	0.649496	41.2498	36.1953	2	14	32	7	0	0	0.0743006	0.42753	0.277446	0.412598
576	113.339886580306	23.1381449887231	739596.782456831	2560735.70695326	97	0.603685	0.252711	0.175742	0.191166	0.173719	92.7617	27.9773	52	207	247	30	8	28	0.136193	0.319085	0.0660841	0.172127
577	113.262413523948	23.1753898377632	731596.782456829	2564735.70695326	10	0.775246	0.683618	1.08567	0.399635	0.799499	75.7477	6.80836	21	94	102	6	0	6	0.137211	0.521806	0.228174	0.114805
580	113.555950186821	23.2070045484366	761596.78245683	2568735.70695326	9	0.719629	1.06626	0.645803	0.357789	0.666847	41.2498	36.1953	6	4	49	8	0	3	0.240782	5.55194	0.0742617	0.623762
581	113.232675406437	23.1487290253613	728596.78245683	2561735.70695326	1	0.444062	0.443451	1.68511	0.812699	0.458462	70.6313	10.8175	3	21	93	7	4	3	0.133823	0.838157	0.109042	0.106767
585	113.309988925619	23.102473315132	736596.782456831	2556735.70695326	3	0.369668	0.749955	0.365459	0.37189	0.147224	96.5466	35.4904	49	131	103	16	2	9	0.0812225	0.761156	0.0980384	0.010445
586	113.348703450982	23.0838456117002	740596.78245683	2554735.70695326	6	0.448775	0.212497	0.488452	0.396556	0.166524	81.9446	13.9161	5	26	16	6	1	3	0.243123	0.621442	0.0905881	0.56473
588	113.555778492907	23.1979803621687	761596.78245683	2567735.70695326	2	0.358956	0.959922	0.838165	0.962343	0.362343	41.2498	36.1953	11	21	91	8	0	3	0.110842	6.17036	0.364107	0.488416
589	113.290780660559	23.1208099715861	734596.782456831	2558735.70695326	6	0.122024	0.083956	0.394358	0.160963	1.23644	96.5466	35.4904	68	143	118	11	17	21	0.0379135	0.489595	0.197799	0.122789
590	113.222765312405	23.1398406164853	727596.78245683	2560735.70695326	3	0.802991	0.064003	0.595993	0.318524	0.11957	70.6313	10.8175	8	18	40	3	0	2	0.0747295	0.613835	0.32148	0.588345
591	113.405952251496	23.0107607998932	746596.78245683	2546735.70695326	4	1.03203	1.05209	0.288451	1.61582	0.524644	60.97	9.63692	0	2	1	0	1	0	0.36618	1.87405	0.673724	0.491142
598	113.485773069382	23.108828999577	754596.782456831	2557735.70695326	1	0.386078	1.16444	1.14399	1.6831	0.311437	41.2498	36.1953	1	5	6	0	0	0	0.395276	1.21847	0.862438	1.61665
599	113.388044567994	23.101311132033	744596.78245683	2556735.70695326	18	0.33527	0.729915	1.61021	0.656755	0.491371	81.9446	13.9161	3	27	86	8	0	6	0.357423	0.406625	0.360077	0.349119
605	113.272023949616	23.1662230803747	732596.78245683	2563735.70695326	4	0.186541	0.270765	0.576628	0.340647	0.210173	75.7477	6.80836	38	125	156	5	1	13	0.131549	0.352054	0.313301	0.302274
608	113.289099111932	23.0215226809832	734596.782456831	2547735.70695326	28	1.00572	1.02958	0.985469	0.931054	0.682098	60.97	9.63692	1	0	0	0	0	0	0.852901	0.96397	0.772608	0.731514
611	113.202216098478	23.0826312677947	725587.595109105	2554367.3429491	6	0.930214	0.233653	2.01134	1.80246	1.01923	70.6313	10.8175	0	1	2	0	0	0	0.213817	2.08201	0.367665	0.992588
613	113.290015166156	23.0756795539258	734596.782456831	2553735.70695326	6	0.278476	0.793978	1.64589	0.151352	0.00561642	81.9446	13.9161	7	84	234	19	1	29	0.204608	0.644335	0.219899	0.330707
615	113.302082652721	23.2109272581029	735596.782456831	2568735.70695326	2	0.229061	0.510908	1.19669	0.808995	0.379115	75.7477	6.80836	17	23	40	6	0	2	0.581292	1.06928	0.270941	0.706033
616	113.235229599511	23.3021759707658	728596.78245683	2578735.70695326	2	1.12075	0.266957	2.6622	1.68798	0.459186	75.7477	6.80836	2	6	33	4	0	1	0.404151	5.01212	0.339888	0.266296
618	113.504950933728	23.0904709395624	756596.782456831	2555735.70695326	4	0.10404	0.656219	2.84579	3.13604	0.582633	41.2498	36.1953	0	2	1	0	0	0	0.539737	0.659503	0.773559	0.239639
619	113.355717539511	22.986177967738	741489.717959454	2543929.06975557	7	0.168857	0.841071	1.62939	0.587485	0.624293	60.97	9.63692	0	8	5	2	0	0	0.433476	2.09322	0.668329	0.497081
622	113.330126899949	23.138289609561	738596.782456831	2560735.70695326	32	0.292346	0.117689	0.39684	0.148024	0.15053	92.7617	27.9773	27	105	149	16	4	18	0.343097	0.34288	0.290706	0.076417
623	113.409009489767	23.1822419801299	746596.78245683	2565735.70695326	2	1.03952	0.498311	0.613635	0.494626	0.322836	92.7617	27.9773	0	7	3	0	1	0	0.1167	0.951352	0.981916	0.132356
624	113.225156969263	23.2842625018177	727596.78245683	2576735.70695326	2	0.751151	1.27629	1.08619	1.40504	0.544757	75.7477	6.80836	0	8	28	1	0	1	0.285649	5.23784	0.661252	0.792947
627	113.466920364278	23.1452349012046	752596.782456831	2561735.70695326	2	0.200727	0.655939	2.87284	0.820037	0.454827	41.2498	36.1953	0	3	1	0	0	0	0.787349	0.758754	0.643878	0.779062
628	113.245052416115	23.3109516242168	729586.639204181	2579723.27371554	6	1.92099	0.867382	3.68684	1.64025	0.69129	75.7477	6.80836	0	2	0	0	0	0	1.0269	3.75254	1.5554	0.991407
629	113.271263053339	23.121092330922	732596.78245683	2558735.70695326	18	0.0220962	0.368768	0.678788	0.187017	0.680669	96.5466	35.4904	79	148	382	35	33	46	0.129295	0.221143	0.0301365	0.132488
630	113.466259964513	23.1091353328714	752596.782456831	2557735.70695326	19	0.392401	0.17207	0.798067	0.571094	0.912215	41.2498	36.1953	7	27	37	7	0	12	0.139357	0.604008	0.262462	0.535942
633	113.310916960139	23.1566288365616	736596.782456831	2562735.70695326	8	0.241741	0.516935	0.968055	0.352925	0.390356	96.5466	35.4904	18	35	81	6	1	3	0.286441	0.521542	0.0956333	0.38721
636	113.330439165952	23.156341155044	738596.782456831	2562735.70695326	40	0.480435	0.330543	0.180012	0.454659	0.690141	92.7617	27.9773	29	74	100	8	1	4	0.148589	0.492424	0.158255	0.190426
637	113.351698538043	23.2553323609452	740596.78245683	2573735.70695326	1	0.59877	0.513611	0.43639	2.2949	0.252993	75.7477	6.80836	4	13	66	6	0	8	0.476161	3.41829	0.404402	0.391211
638	113.251443922474	23.1033196566315	730596.782456829	2556735.70695326	16	0.124622	0.601694	0.827512	0.353911	0.245618	70.6313	10.8175	36	52	57	1	6	5	0.102326	0.155379	0.0928712	0.172641
639	113.369006524306	23.1286819697223	742596.78245683	2559735.70695326	32	0.128057	0.230949	0.270871	0.61588	0.349909	92.7617	27.9773	20	63	121	3	2	6	0.255094	0.721602	0.251587	0.361238
640	113.310762093328	23.1476029445902	736596.782456831	2561735.70695326	29	0.242243	0.391161	0.388856	0.209697	0.248734	96.5466	35.4904	35	115	122	7	13	20	0.234284	0.370804	0.130484	0.112377
641	113.281939116202	23.175107950607	733596.782456831	2564735.70695326	3	0.413328	0.630363	1.6739	0.693007	1.20419	75.7477	6.80836	0	1	0	0	0	0	0.54152	0.634088	0.992785	0.668339
642	113.242286287171	23.1395640461162	729596.782456829	2560735.70695326	6	0.130952	0.323715	1.48794	0.615672	0.523342	70.6313	10.8175	31	74	92	8	1	11	0.170052	0.0734611	0.183623	0.086003
644	113.416507143161	23.0557389615714	747596.78245683	2551735.70695326	2	0.131405	1.40564	0.228109	0.163818	0.908057	60.97	9.63692	0	4	12	1	1	0	0.217141	1.65165	0.261264	1.16379
650	113.224108256808	23.2210782818889	727596.78245683	2569735.70695326	4	0.487133	0.646991	1.0818	2.30905	0.452617	75.7477	6.80836	5	10	54	8	0	1	0.352322	0.397221	0.217283	0.722905
654	113.328259884602	23.0299793864592	738596.782456831	2548735.70695326	3	0.567989	0.953926	4.00998	0.474025	0.434049	60.97	9.63692	7	14	18	7	1	5	0.181629	1.03656	0.365615	0.344566
655	113.396361757314	23.0199342309558	745596.78245683	2547735.70695326	8	0.207766	0.276432	1.45197	0.937253	0.543831	60.97	9.63692	3	4	9	2	0	0	0.459691	0.828428	0.846117	0.377273
656	113.251745140485	23.1213722786752	730596.782456829	2558735.70695326	4	0.148062	0.386083	0.133974	0.212515	0.439268	70.6313	10.8175	51	121	282	19	7	19	0.0534727	0.542571	0.0150172	0.0996632
657	113.202065816516	23.0679017981351	725596.78245683	2552735.70695326	1	0.542679	0.490775	1.59753	0.571235	0.372188	70.6313	10.8175	3	23	2	0	0	0	0.0406663	0.996858	0.56202	0.634909
662	113.243641001693	23.2208006295085	729596.782456829	2569735.70695326	2	0.195633	0.578057	1.64606	2.22426	0.575441	75.7477	6.80836	0	17	75	16	0	1	0.431577	1.56947	0.395776	0.89668
664	113.379881844248	23.1917130718852	743596.78245683	2566735.70695326	2	0.669729	0.210103	0.293451	0.278435	0.17154	92.7617	27.9773	0	13	9	0	0	1	0.184933	0.202044	0.403846	0.580338
665	113.361784627849	23.2732364119413	741596.763509447	2575735.68797894	1	0.500017	2.02205	1.07995	1.92836	0.65454	75.7477	6.80836	1	0	2	0	0	0	0.634178	3.12212	0.499917	0.890481
666	113.328570271344	23.0480312032824	738596.782456831	2550735.70695326	6	0.788003	0.569812	2.50379	1.95168	1.10262	81.9446	13.9161	0	1	0	0	0	0	0.805952	1.19049	0.855699	1.00136
668	113.408040888745	23.1280904722173	746596.78245683	2559735.70695326	19	0.592693	0.45807	1.19319	0.834198	0.282396	92.7617	27.9773	11	86	198	14	2	9	0.257928	0.463742	0.178148	0.184532
670	113.535913008439	23.1802478137258	759596.782456829	2565735.70695326	4	0.718453	0.944846	3.66406	1.18508	0.717943	41.2498	36.1953	0	0	0	0	0	0	0.933427	3.56507	2.45809	0.675193
671	113.506628836127	23.1807170703979	756596.782456831	2565735.70695326	48	0.561422	0.814185	2.77315	0.823334	0.713844	41.2498	36.1953	4	3	44	2	0	1	0.389903	0.968514	0.355359	0.530322
672	113.340514037516	23.1742477829869	739596.782456831	2564735.70695326	3	0.376545	0.480349	0.266148	0.587281	0.0238863	92.7617	27.9773	8	75	207	9	1	11	0.12601	0.445806	0.0556296	0.0983947
673	113.535233003259	23.144150313072	759596.782456829	2561735.70695326	19	0.796713	0.360429	7.11106	1.04675	0.312665	41.2498	36.1953	0	1	3	0	0	0	0.218084	4.61852	0.658395	0.812187
674	113.495362652027	23.0996502091376	755596.782456831	2556735.70695326	2	0.0696066	0.293413	1.66657	2.68735	1.24071	41.2498	36.1953	0	1	0	0	0	0	0.921657	1.12899	1.25224	1.2537
677	113.496867276047	23.1808722808245	755596.782456831	2565735.70695326	3	0.657274	0.404814	2.44074	0.429828	0.957868	41.2498	36.1953	2	4	12	1	3	1	0.222866	0.932158	0.372655	0.49847
679	113.576705434103	23.2313076540122	763674.266257331	2571465.55319534	1	0.942431	1.80856	3.44969	2.69801	1.12282	41.2498	36.1953	0	0	0	0	0	0	1.07109	5.15406	2.50937	1.92636
681	113.359563755195	23.1468795263398	741596.78245683	2561735.70695326	14	0.543788	0.546458	0.37072	0.062297	0.229152	92.7617	27.9773	14	18	12	1	2	0	0.136381	0.974339	0.168259	0.565233
682	113.337856038107	23.0208096563607	739596.782456831	2547735.70695326	2	0.238589	0.14779	3.73869	0.740811	0.508034	60.97	9.63692	7	32	42	3	0	2	0.215184	1.40189	0.192466	0.57711
683	113.370118562432	23.1918604891414	742596.78245683	2566735.70695326	1	0.331506	0.314297	0.671443	0.451698	0.214521	92.7617	27.9773	6	35	187	11	3	13	0.203918	0.366444	0.209543	0.214929
685	113.261201614179	23.1031801056285	731596.782456829	2556735.70695326	7	0.213295	0.854858	0.483658	0.587247	0.406307	81.9446	13.9161	57	133	130	8	5	30	0.0679633	0.858931	0.0511594	0.0184357
686	113.272939550643	23.2203796072113	732596.78245683	2569735.70695326	14	0.502771	0.417063	0.353789	0.121536	0.00546977	75.7477	6.80836	11	60	132	5	2	13	0.222717	0.26745	0.188932	0.329358
688	113.427395133403	23.1187659449818	748596.782456829	2558735.70695326	6	0.109151	0.243669	2.28535	0.945965	0.212729	92.7617	27.9773	11	75	85	5	1	7	0.067376	0.718569	0.116572	0.339138
689	113.338167565061	23.0388613702875	739596.782456831	2549735.70695326	2	0.689014	0.259609	2.98625	1.79049	0.980826	60.97	9.63692	1	7	42	3	0	4	0.486992	0.209108	0.38116	0.598282
690	113.192310277601	23.0680374979435	724596.78245683	2552735.70695326	2	0.344055	0.683501	2.58103	0.442654	0.216671	70.6313	10.8175	8	17	66	4	0	0	0.176762	0.203398	0.138293	0.466534
691	113.397480733269	23.0831123580481	745596.78245683	2554735.70695326	1	0.658545	0.870451	0.657073	0.800937	0.762486	81.9446	13.9161	0	0	1	1	0	0	0.852038	1.96512	0.696486	0.927081
693	113.283166383143	23.2473159816437	733596.782456831	2572735.70695326	6	0.227226	0.761332	0.329336	0.703897	0.0743331	75.7477	6.80836	1	22	26	2	3	3	0.246467	1.19949	0.255312	0.385963
696	113.376701932392	23.011202818281	743596.78245683	2546735.70695326	1	0.486276	0.456086	2.01981	0.315749	0.30329	60.97	9.63692	5	26	49	5	0	1	0.229383	1.16559	0.188832	0.207738
700	113.282245471239	23.1931600262296	733596.782456831	2566735.70695326	3	0.391208	0.620634	0.74755	1.01287	0.832712	75.7477	6.80836	4	11	1	1	2	0	0.536916	0.568401	0.420988	0.608366
701	113.244093934526	23.2478792876416	729596.782456829	2572735.70695326	3	0.542888	0.900916	1.6466	1.14207	0.0669267	75.7477	6.80836	0	9	16	4	0	0	0.630736	2.7807	0.570811	0.452104
702	113.57582238441	23.224733920551	763596.78245683	2570735.70695326	18	1.3532	1.56245	2.77385	2.6756	0.428885	41.2498	36.1953	1	1	2	1	0	0	0.42684	5.70463	1.9551	1.43406
703	113.42755758619	23.1277911060927	748596.782456829	2559735.70695326	11	0.221349	0.0654696	1.5438	1.61168	0.124826	92.7617	27.9773	0	30	91	9	1	3	0.0512795	1.41327	0.0395861	0.37155
704	113.271415079686	23.1301185033645	732596.78245683	2559735.70695326	19	0.141247	0.155568	0.768189	0.172719	0.701241	96.5466	35.4904	71	138	159	11	13	12	0.112571	0.157824	0.0506036	0.0426895
705	113.376324879025	22.993494091144	743589.930474492	2544773.54856413	3	0.623378	0.740602	1.82276	0.313151	0.0234494	60.97	9.63692	1	6	30	2	0	0	0.155264	2.65436	0.327923	0.320572
706	113.456832019027	23.1273375356481	751596.78245683	2559735.70695326	2	0.478521	0.732485	2.37926	1.83147	0.102119	41.2498	36.1953	1	6	18	0	0	0	0.122005	0.586492	0.506946	0.6102
710	113.263021307323	23.211494433165	731596.782456829	2568735.70695326	4	0.299703	0.140489	0.554689	1.03652	0.373867	75.7477	6.80836	5	49	91	5	2	3	0.111743	0.425353	0.272426	0.464379
712	113.329814947621	23.1202380187814	738596.782456831	2558735.70695326	14	0.424214	0.442692	1.52713	0.542818	0.843753	92.7617	27.9773	19	129	201	26	4	41	0.180205	0.241767	0.0206183	0.124339
713	113.242436508821	23.1485903782174	729596.782456829	2561735.70695326	3	0.466417	0.376729	1.45747	0.134216	0.501413	70.6313	10.8175	18	61	120	12	4	8	0.0398028	0.609505	0.113276	0.0885421
714	113.515715528085	23.1444632113886	757596.782456831	2561735.70695326	10	0.626518	1.60112	6.14397	0.8915	0.32249	41.2498	36.1953	0	2	0	0	0	0	0.255917	3.39016	0.648653	1.37407
715	113.319746156201	23.1023301500709	737596.782456831	2556735.70695326	25	0.317	0.3691	0.284204	0.655126	0.419127	81.9446	13.9161	22	76	57	4	6	7	0.0593305	0.480398	0.158476	0.227328
716	113.457490474027	23.163437277414	751596.78245683	2563735.70695326	88	0.498897	0.235287	1.09665	0.279709	0.366291	41.2498	36.1953	2	9	19	6	1	2	0.128176	0.791473	0.20542	0.370481
717	113.477011567338	23.1631313522112	753596.782456831	2563735.70695326	18	1.39478	0.371334	1.88271	0.307761	0.666337	41.2498	36.1953	2	7	7	0	0	0	0.327554	1.08778	0.363922	0.260322
718	113.35735826176	23.020520247207	741596.78245683	2547735.70695326	4	0.185052	0.604204	2.28284	1.28432	0.640815	60.97	9.63692	3	3	20	2	0	2	0.310841	0.986882	0.278784	0.938522
719	113.437969049721	23.1637407873089	749596.782456829	2563735.70695326	84	0.451585	0.357904	1.37723	0.11745	0.177136	41.2498	36.1953	0	39	15	1	2	0	0.0370251	0.622719	0.275646	0.264583
720	113.351381919056	23.2372813173451	740596.78245683	2571735.70695326	1	0.0747133	0.700101	0.727377	1.52719	0.690124	75.7477	6.80836	7	5	36	7	0	0	0.181345	3.72264	0.0326795	0.873519
721	113.300077867708	23.0935898561063	735596.782456831	2555735.70695326	6	0.295681	0.40996	0.0602323	0.108013	0.527087	81.9446	13.9161	13	43	75	4	13	3	0.247262	0.636289	0.167657	0.246706
722	113.4771776939	23.1721561262655	753596.782456831	2564735.70695326	40	0.788119	0.625062	1.58556	0.353551	0.784626	41.2498	36.1953	2	10	11	2	0	2	0.205228	0.448305	0.481388	0.248613
725	113.407879738931	23.1190651810238	746596.78245683	2558735.70695326	21	0.471616	0.666277	1.25282	0.272487	0.250532	92.7617	27.9773	25	102	284	20	2	25	0.098216	1.2043	0.152901	0.0994677
726	113.380361593242	23.2187892177824	743596.78245683	2569735.70695326	3	0.145162	0.909433	0.469633	2.0511	0.528477	92.7617	27.9773	2	6	14	3	0	0	0.366324	3.06026	0.673208	0.705338
728	113.268991814462	22.985698394078	732596.78245683	2543735.70695326	3	0.866	0.221831	3.97461	0.53586	1.06603	60.97	9.63692	1	24	24	2	2	0	0.163896	0.207765	0.0255305	0.316486
729	113.279044053726	23.0036109822618	733596.782456831	2545735.70695326	16	0.533627	0.915409	1.83966	1.64119	0.518425	60.97	9.63692	0	2	1	0	0	0	0.567129	1.03016	0.368444	0.762433
731	113.426098448258	23.0465642460148	748596.782456829	2550735.70695326	4	0.606391	0.911452	0.143094	1.39628	1.00989	60.97	9.63692	0	8	1	0	0	0	0.547603	2.24355	0.19832	1.3384
735	113.408363431439	23.1461410204408	746596.78245683	2561735.70695326	1	0.417763	0.622552	0.677428	0.648271	0.24502	92.7617	27.9773	5	30	26	2	2	4	0.228437	0.232716	0.271605	0.51368
737	113.399569311411	23.2004416877769	745596.78245683	2567735.70695326	6	0.494921	1.56936	1.30611	1.66434	0.594525	92.7617	27.9773	1	2	11	2	0	0	0.725822	0.860949	0.643763	0.704171
738	113.495195891331	23.0906254771941	755596.782456831	2555735.70695326	1	0.412329	0.43739	1.94046	3.059	1.27058	41.2498	36.1953	7	2	1	0	0	0	0.598689	0.771457	0.295327	0.760389
739	113.340828239069	23.1922991120517	739596.782456831	2566735.70695326	1	0.800986	0.609531	0.474002	1.14015	0.352713	92.7617	27.9773	6	34	64	7	1	3	0.298843	1.55099	0.136328	0.0838617
742	113.31928123654	23.0752524236247	737596.782456831	2553735.70695326	1	0.151234	0.379764	0.930528	1.13597	0.0299253	81.9446	13.9161	2	34	55	8	2	5	0.278994	0.391352	0.0748385	0.299998
745	113.544650819115	23.1259442764745	760596.782456829	2559735.70695326	2	1.22571	0.741423	6.86033	1.01533	0.460852	41.2498	36.1953	0	14	12	1	0	1	0.332539	3.00486	0.368395	1.05438
747	113.298086150072	22.9762505475095	735596.782456831	2542735.70695326	1	0.486075	0.494714	3.64009	0.847053	0.361255	60.97	9.63692	1	13	12	1	0	0	0.439982	1.50443	0.350027	0.543242
749	113.466755139859	23.1362100262796	752596.782456831	2560735.70695326	2	0.632186	0.650905	2.87909	1.63133	0.248056	41.2498	36.1953	1	5	10	1	0	0	0.106106	1.16133	0.40183	0.22792
751	113.251293427044	23.0942933287393	730596.782456829	2555735.70695326	2	0.123506	0.312973	0.964511	0.165412	0.103275	70.6313	10.8175	28	65	79	7	0	14	0.0936328	0.487581	0.175103	0.21923
752	113.34004332643	23.1471707042967	739596.782456831	2561735.70695326	52	0.418845	0.415035	0.105714	0.266392	0.347603	92.7617	27.9773	38	111	74	3	9	9	0.18715	0.716815	0.322864	0.397761
754	113.357044458297	23.002468740567	741596.78245683	2545735.70695326	16	0.588583	1.66162	3.22448	0.857439	0.93744	60.97	9.63692	3	2	5	2	0	2	0.636736	0.91917	0.354216	0.511007
756	113.552715927007	23.0818835002759	761508.496894598	2554869.19935918	2	1.2745	0.841887	2.94858	1.94503	1.33061	41.2498	36.1953	0	0	1	0	0	0	0.256169	1.83184	1.39584	1.59378
763	113.25204666151	23.1394248557072	730596.782456829	2560735.70695326	22	0.196037	0.347754	0.616594	0.0450499	0.498988	70.6313	10.8175	30	63	78	7	5	3	0.0792352	0.531204	0.0786627	0.012553
764	113.320367141172	23.1384336270956	737596.782456831	2560735.70695326	28	0.320945	0.725631	0.5799	0.217504	0.86965	92.7617	27.9773	23	116	214	23	6	28	0.189191	0.495884	0.050103	0.0853405
766	113.320056492596	23.1203819112007	737596.782456831	2558735.70695326	16	0.234435	0.456608	1.76922	0.161975	0.230736	96.5466	35.4904	17	179	261	27	7	27	0.10445	0.0658003	0.129224	0.035332
767	113.573577984559	23.2070141261008	763401.77580893	2568768.62867372	2	1.22709	1.12839	1.32574	1.46786	0.419626	41.2498	36.1953	0	0	1	0	0	0	0.118317	6.69814	0.995366	1.57835
768	113.216589237482	23.3086622858145	726678.771362715	2579424.81772751	1	1.33815	1.98513	3.11361	1.06683	1.20752	75.7477	6.80836	0	0	0	0	0	0	0.316537	6.2283	1.0816	1.09896
771	113.389324306839	23.1735143573364	744596.78245683	2564735.70695326	6	0.371121	0.57262	1.99967	1.7016	0.296791	92.7617	27.9773	1	6	15	4	0	0	0.597919	1.7463	0.415011	0.873441
772	113.2711111034	23.1120661472108	732596.78245683	2557735.70695326	5	0.29122	0.224436	0.207683	0.174339	0.218855	96.5466	35.4904	30	97	124	8	10	23	0.182574	0.542533	0.12911	0.191679
775	113.205466006059	23.2755121631686	725596.78245683	2575735.70695326	1	0.234398	0.557393	0.388462	2.97812	0.518315	75.7477	6.80836	3	0	50	1	2	0	0.248222	4.34882	0.432433	0.507974
777	113.360038384061	23.1739562255832	741596.78245683	2564735.70695326	3	0.294586	0.432053	0.288035	0.167928	0.711104	92.7617	27.9773	2	16	7	0	0	0	0.151223	1.1659	0.223459	0.762921
779	113.397160623378	23.0650615213364	745596.78245683	2552735.70695326	43	0.345244	0.479962	0.0600243	0.284694	1.13772	41.2498	36.1953	5	16	97	6	3	4	0.33802	1.32616	0.34794	0.624707
780	113.377811264398	23.0743819233227	743596.78245683	2553735.70695326	15	0.156886	0.164623	1.22464	0.439888	0.378955	81.9446	13.9161	3	16	26	9	1	1	0.18096	0.777797	0.136487	0.487445
781	113.224557254449	23.2481573009742	727596.78245683	2572735.70695326	3	1.06279	1.35418	2.72666	3.1195	0.370061	75.7477	6.80836	0	6	1	3	0	0	0.202734	1.40374	0.81383	0.697898
784	113.244698905467	23.2839840069956	729596.782456829	2576735.70695326	4	0.331719	1.01662	0.785925	0.504711	0.612196	75.7477	6.80836	0	3	8	3	0	0	0.163212	4.46174	0.503049	0.472231
785	113.352015474556	23.2733833589927	740596.78245683	2575735.70695326	1	0.825132	1.71966	1.0719	1.97168	0.191711	75.7477	6.80836	2	11	17	0	0	0	0.27974	2.7516	0.323952	0.450471
786	113.52564352924	23.1533315243186	758596.782456831	2562735.70695326	8	1.0004	1.52927	6.37456	1.28312	0.220953	41.2498	36.1953	0	10	7	0	0	0	0.124637	3.20751	0.653784	0.175743
788	113.29839171965	22.9943028726088	735596.782456831	2544735.70695326	10	1.09958	1.12832	2.19459	0.646102	0.259693	60.97	9.63692	0	1	2	0	0	0	0.455121	0.443321	1.08964	1.07812
790	113.280716769153	23.1028991964688	733596.782456831	2556735.70695326	15	0.367572	0.395691	0.228322	0.29802	0.795125	81.9446	13.9161	50	137	119	9	1	24	0.0433959	0.891306	0.0617128	0.087088
792	113.242737178625	23.1666430086482	729596.782456829	2563735.70695326	3	0.305409	0.630457	1.46975	0.49752	0.104137	96.5466	35.4904	14	38	100	13	0	5	0.0878944	0.834274	0.294508	0.563527
794	113.476182185088	23.1180073100968	753596.782456831	2558735.70695326	1	0.94765	1.38195	1.47508	1.56328	0.54338	41.2498	36.1953	0	1	0	0	0	0	0.725909	1.69165	1.02063	1.45609
795	113.416184921379	23.0376883155899	747596.78245683	2549735.70695326	5	0.250405	0.540051	0.276448	1.02772	0.374112	60.97	9.63692	3	20	60	3	2	2	0.102689	0.986069	0.0886557	0.0584876
799	113.330282993729	23.1473153879664	738596.782456831	2561735.70695326	53	0.378284	0.439646	0.305926	0.203478	0.447402	92.7617	27.9773	39	138	147	9	1	17	0.300675	0.486425	0.065369	0.259695
801	113.25069220196	23.0581879047864	730596.782456829	2551735.70695326	28	0.579039	0.51563	2.42837	0.786292	0.170262	70.6313	10.8175	7	34	69	11	0	4	0.118252	0.526622	0.22184	0.166367
804	113.543010094674	23.0721154130085	760532.581211289	2553769.76734455	11	1.14287	1.17899	1.51788	0.810008	0.0893559	41.2498	36.1953	0	8	1	0	1	0	0.275867	1.75345	1.34014	0.358318
806	113.281480160139	23.1480297524437	733596.782456831	2561735.70695326	15	0.0888633	0.344582	0.286287	0.609461	0.823095	96.5466	35.4904	11	18	41	3	4	6	0.352984	0.46237	0.416996	0.600199
808	113.340985458165	23.2013247595544	739596.782456831	2567735.70695326	9	0.184548	0.563131	1.01592	1.65878	0.912911	75.7477	6.80836	1	2	0	0	1	0	0.581996	1.54502	0.80375	1.026
809	113.445603116681	23.0462636480833	750596.782456829	2550735.70695326	4	0.41584	0.526118	1.01977	1.18745	0.179132	60.97	9.63692	1	2	29	0	2	2	0.592163	3.61835	0.0915294	0.459966
814	113.26089939755	23.0851275599869	731596.782456829	2554735.70695326	1	0.349558	0.308625	0.901833	0.622632	0.23786	81.9446	13.9161	14	94	105	12	3	8	0.207631	0.294151	0.22309	0.112483
816	113.245001845845	23.3020362988262	729596.782456829	2578735.70695326	2	1.84667	1.14458	2.72301	0.983527	0.262563	75.7477	6.80836	0	5	2	0	0	0	0.646657	4.10959	0.568513	0.461483
819	113.447565717984	23.1545643500085	750596.782456829	2562735.70695326	44	1.34321	0.947526	1.69965	0.467562	0.210454	41.2498	36.1953	2	8	8	1	0	2	0.123253	1.16158	0.804744	0.513833
822	113.213098927124	23.0851627014961	726698.532846992	2554664.57557703	2	0.238146	0.77829	1.62629	1.93235	0.71963	70.6313	10.8175	0	2	11	2	1	0	0.17224	2.06871	0.692634	0.427499
824	113.562469010801	23.0980881719639	762476.591289502	2556681.82861146	8	0.411761	0.867218	4.90672	0.958301	0.470944	41.2498	36.1953	0	0	0	0	0	0	0.456625	1.57887	0.529044	1.11757
825	113.436663887355	23.0915400676164	749596.782456829	2555735.70695326	1	0.564747	0.578922	0.447246	1.37005	1.07272	41.2498	36.1953	3	3	0	0	0	0	0.545901	0.973326	0.606967	0.620781
827	113.378606040617	23.1195095153858	743596.78245683	2558735.70695326	3	0.421606	0.567947	1.4291	0.509047	0.332153	92.7617	27.9773	7	52	102	6	1	7	0.080485	0.136745	0.115589	0.100187
828	113.36916514759	23.1377075065858	742596.78245683	2560735.70695326	121	0.341958	1.09693	0.525117	0.722983	0.0631573	92.7617	27.9773	35	50	219	12	2	11	0.313581	1.08055	0.0415852	0.237175
829	113.456339045687	23.1002626093057	751596.78245683	2556735.70695326	18	0.481588	0.265161	0.714017	0.661415	0.500139	41.2498	36.1953	18	56	124	8	7	16	0.122582	0.522462	0.325902	0.00881498
831	113.418609505303	23.1730670510017	747596.78245683	2564735.70695326	46	0.332664	0.188094	0.57798	0.218812	0.196922	92.7617	27.9773	1	22	3	0	0	1	0.228083	1.50713	0.913237	0.23316
836	113.337189093007	22.984754106846	739592.100019388	2543740.95186793	7	0.285197	0.28702	1.15512	0.725973	0.650631	60.97	9.63692	0	1	1	0	0	0	0.650895	1.09455	0.477042	0.854049
838	113.340671098861	23.1832734531946	739596.782456831	2565735.70695326	16	0.586379	1.0632	0.566424	1.08825	0.412603	92.7617	27.9773	9	32	101	2	1	6	0.0877867	1.01443	0.317935	0.46547
840	113.378128935051	23.0924329941921	743596.78245683	2555735.70695326	12	0.53198	0.744621	1.03928	0.45587	0.453408	81.9446	13.9161	0	12	7	1	0	1	0.369095	0.797016	0.311149	0.391957
841	113.357201320493	23.0114944995356	741596.78245683	2546735.70695326	44	0.442392	0.750344	3.17894	0.843283	0.662633	60.97	9.63692	5	30	41	2	0	1	0.227522	0.994834	0.255937	0.438072
842	113.254774016301	23.3018960186873	730596.782456829	2578735.70695326	1	0.944422	0.697801	2.91595	0.379637	1.25547	75.7477	6.80836	0	2	7	1	0	1	0.746093	3.26438	0.603786	0.864526
845	113.486938768578	23.1720021911894	754596.782456831	2564735.70695326	1	0.575723	0.568406	2.58553	0.732773	0.0926494	41.2498	36.1953	3	13	13	3	1	4	0.0903638	0.708691	0.0573903	0.336976
846	113.408686298382	23.1641915230882	746596.78245683	2563735.70695326	7	0.478419	0.514947	0.543183	0.611064	0.456001	92.7617	27.9773	7	38	145	4	0	18	0.375887	0.527607	0.152649	0.330146
848	113.417961160792	23.1369663054739	747596.78245683	2560735.70695326	16	0.65377	1.17182	0.252964	0.770265	0.149966	92.7617	27.9773	1	12	8	0	0	2	0.438088	1.21691	0.718409	0.346217
849	113.525812835327	23.1623559733276	758596.782456831	2563735.70695326	13	0.609945	1.38573	5.55057	1.08684	0.801466	41.2498	36.1953	2	9	26	3	0	3	0.232395	2.67074	0.714783	0.642943
850	113.438459839476	23.1908158687532	749596.782456829	2566735.70695326	5	0.355099	0.239664	2.9537	1.0238	0.282882	41.2498	36.1953	3	10	23	1	0	0	0.22838	0.510282	0.317971	0.23855
852	113.312314265695	23.2378613546792	736596.782456831	2571735.70695326	4	0.449804	1.32114	1.25921	1.69711	0.37928	75.7477	6.80836	1	2	2	0	0	0	0.284636	1.46626	0.493807	1.16079
853	113.334707135803	22.9777678493571	739349.886671008	2542963.0730177	1	0.503793	0.658679	0.340602	0.334936	0.0908848	60.97	9.63692	0	1	0	0	0	0	0.645363	0.740211	0.52161	0.678955
854	113.272176358348	23.1752491964191	732596.78245683	2564735.70695326	4	0.640613	0.680908	1.35748	0.360821	0.858379	75.7477	6.80836	24	53	68	4	2	1	0.208578	0.387905	0.110938	0.215088
856	113.330595416641	23.1653669107901	738596.782456831	2563735.70695326	29	0.49404	0.98161	0.641458	0.339481	0.147265	92.7617	27.9773	9	52	95	6	1	4	0.193417	0.640747	0.0970358	0.237182
858	113.288794375262	23.0034703000075	734596.782456831	2545735.70695326	4	0.199981	0.607464	1.21427	0.768312	0.404893	60.97	9.63692	2	0	6	1	0	0	0.556298	0.994295	0.723526	0.974567
860	113.293707134198	23.2923029819298	734596.782456831	2577735.70695326	3	0.776679	1.02381	0.779481	2.53757	0.348209	75.7477	6.80836	0	1	4	0	0	0	0.380398	0.760512	0.658832	0.535032
862	113.429023339271	23.2090170424888	748596.782456829	2568735.70695326	2	0.292846	1.02996	3.49124	2.01888	2.10103	41.2498	36.1953	0	0	1	0	0	0	0.975083	2.28464	1.17183	1.08738
863	113.288946705202	23.0124964961157	734596.782456831	2546735.70695326	5	0.568674	1.03095	0.47202	1.63094	0.145822	60.97	9.63692	1	15	16	6	1	0	0.153234	0.16002	0.114576	0.310463
869	113.418934166237	23.1911173552991	747596.78245683	2566735.70695326	61	0.942772	0.904964	1.4992	0.317172	0.609874	92.7617	27.9773	4	15	22	8	1	1	0.0419862	0.798812	0.0408808	0.249303
871	113.437315812574	23.1276405187584	749596.782456829	2559735.70695326	3	0.379752	0.709791	1.52723	1.24318	0.202559	92.7617	27.9773	2	15	50	7	1	6	0.369019	2.00304	0.186286	0.559637
872	113.26165550945	23.1302588396804	731596.782456829	2559735.70695326	8	0.276815	0.306535	0.645982	0.144313	0.854205	96.5466	35.4904	35	118	108	8	3	10	0.167626	0.184048	0.0954675	0.0954802
873	113.273092418989	23.2294056554583	732596.78245683	2570735.70695326	1	0.175092	0.73553	0.975196	0.619241	0.0970998	75.7477	6.80836	8	47	259	31	1	16	0.183757	0.739869	0.0889949	0.0403988
874	113.253407260789	23.220660894554	730596.782456829	2569735.70695326	4	0.186845	0.39597	1.18019	1.84969	0.149436	75.7477	6.80836	6	26	148	10	2	15	0.121667	0.940059	0.128933	0.17476
877	113.475851015317	23.0999576131273	753596.782456831	2556735.70695326	39	0.461417	0.23596	0.308434	0.845662	0.639169	41.2498	36.1953	5	20	34	0	1	4	0.231734	0.633693	0.438555	0.540981
882	113.54380033176	23.0808223683437	760596.782456829	2554735.70695326	5	0.565167	0.418284	2.20603	1.10338	0.60897	41.2498	36.1953	0	2	0	0	0	0	0.397628	1.56348	1.43937	0.884886
883	113.408202119573	23.1371157520242	746596.78245683	2560735.70695326	12	0.887718	0.703772	0.629816	0.612204	0.653341	92.7617	27.9773	0	28	13	2	1	0	0.367159	0.373238	0.973939	0.276334
888	113.447073956961	23.1274893286033	750596.782456829	2559735.70695326	26	1.05906	1.04297	1.73109	1.20411	0.126697	92.7617	27.9773	0	1	1	0	0	0	0.62212	1.08539	1.14292	0.788067
889	113.457655294586	23.172462184255	751596.78245683	2564735.70695326	157	0.595667	0.425294	0.414796	0.466474	0.074067	41.2498	36.1953	1	27	31	0	2	0	0.194055	0.266534	0.221972	0.0347621
891	113.281327328424	23.1390036638093	733596.782456831	2560735.70695326	40	0.407939	0.220157	0.458578	0.268971	0.521405	96.5466	35.4904	45	140	115	16	11	13	0.114411	0.362132	0.102573	0.0810312
892	113.506460666339	23.171692508979	756596.782456831	2564735.70695326	4	0.411029	0.376179	3.67648	0.991743	0.458734	41.2498	36.1953	7	44	128	8	2	17	0.00587599	0.450419	0.0826814	0.269198
896	113.398282418338	23.1282392509669	745596.78245683	2559735.70695326	41	0.482426	0.720256	0.454295	1.12068	0.100946	92.7617	27.9773	24	110	131	7	1	12	0.450115	0.510037	0.0252096	0.282822
900	113.21367696031	23.1760557411136	726604.893624471	2564732.70225051	1	0.51762	0.493421	1.2107	2.07099	1.07609	75.7477	6.80836	2	12	4	3	0	0	0.352236	0.757853	0.469488	0.485666
901	113.292471533859	23.2200958967517	734596.782456831	2569735.70695326	2	0.586579	0.90508	0.379229	0.323827	0.361027	75.7477	6.80836	9	74	134	9	3	16	0.0628921	0.505268	0.140686	0.0872755
903	113.387406626244	23.0652092466517	744596.78245683	2552735.70695326	11	0.180452	0.418533	0.0488866	0.0769164	0.852046	81.9446	13.9161	3	20	50	8	2	5	0.320625	0.777677	0.392611	0.549491
904	113.262869247074	23.2024683012511	731596.782456829	2567735.70695326	2	0.58335	0.614722	0.162322	0.211583	0.197657	75.7477	6.80836	18	64	118	6	2	6	0.117071	0.141356	0.0711133	0.213558
907	113.349488862547	23.128974100781	740596.78245683	2559735.70695326	59	0.0513259	0.45402	0.0938242	0.0655515	0.363992	92.7617	27.9773	14	98	24	4	7	5	0.385286	0.368511	0.116934	0.384144
908	113.496364978632	23.1537983601685	755596.782456831	2562735.70695326	2	0.432843	1.66115	4.11304	0.120792	0.0228425	41.2498	36.1953	2	16	7	0	0	1	0.107384	2.06809	0.175974	0.458575
910	113.447729803084	23.1635893342853	750596.782456829	2563735.70695326	113	0.630482	0.401809	1.74117	0.110142	0.0970412	41.2498	36.1953	2	51	22	1	2	0	0.113265	0.194985	0.1756	0.44038
912	113.377652548918	23.065356370877	743596.78245683	2552735.70695326	59	0.332205	0.200642	0.77743	0.561966	0.595103	81.9446	13.9161	0	21	3	1	0	1	0.200706	0.153745	0.311528	0.283025
914	113.57538483251	23.2159176019161	763569.30506577	2569758.23676118	7	1.41757	1.8017	1.99042	1.97908	0.272792	41.2498	36.1953	0	2	0	0	0	0	0.395714	6.19815	1.30211	1.3097
915	113.485939346895	23.117853775608	754596.782456831	2558735.70695326	7	1.0578	1.87349	1.95972	2.1673	1.01776	41.2498	36.1953	0	1	0	0	0	0	0.980278	2.21628	1.62966	2.06963
916	113.339104030415	23.0930162409436	739596.782456831	2555735.70695326	10	0.494414	1.30821	0.335938	0.472084	0.599433	81.9446	13.9161	12	25	16	1	2	2	0.547016	0.562398	0.422045	0.496791
918	113.532526009604	23.0549212735325	759490.995813533	2551846.40297592	6	2.08679	0.671931	0.887756	0.835433	0.160337	41.2498	36.1953	1	6	0	0	0	0	0.219574	0.860371	0.781025	0.282248
921	113.34792001274	23.0387168396579	740596.78245683	2549735.70695326	2	0.910384	0.626846	1.99886	2.49792	1.01493	60.97	9.63692	1	2	1	0	0	0	0.55163	0.944031	0.725113	0.633632
922	113.574348520857	23.1882657392397	763517.459739152	2566693.07802201	4	0.693127	0.441513	2.17998	0.905352	0.112101	41.2498	36.1953	0	3	35	6	0	0	0.270943	6.95205	0.421821	0.777419
924	113.282552133952	23.2112120566293	733596.782456831	2568735.70695326	2	0.0427416	0.345086	1.08528	0.193072	0.288461	75.7477	6.80836	13	60	279	17	4	8	0.1061	0.0236893	0.0277792	0.131019
925	113.2511430073	23.0852669896051	730596.782456829	2554735.70695326	2	0.2325	0.231223	1.15407	0.400399	0.574365	70.6313	10.8175	10	53	42	3	1	10	0.24818	0.510145	0.32062	0.472757
926	113.252801790953	23.1845561011707	730596.782456829	2565735.70695326	3	0.233069	0.252221	0.265546	0.697403	0.115337	75.7477	6.80836	36	88	194	19	1	22	0.145188	0.813844	0.115201	0.32668
929	113.349331622227	23.1199484256238	740596.78245683	2558735.70695326	7	0.139581	0.624363	0.181594	0.413377	0.377849	92.7617	27.9773	14	73	77	2	1	4	0.0792829	0.358449	0.0208261	0.241161
930	113.302857214078	23.2560565187307	735596.782456831	2573735.70695326	6	0.656361	0.647432	0.411463	0.524737	0.443165	75.7477	6.80836	2	20	59	6	0	2	0.318028	1.5681	0.374266	0.531961
931	113.260597484884	23.0670749693601	731596.782456829	2552735.70695326	7	0.466467	0.888213	1.68722	1.54236	0.479025	70.6313	10.8175	5	1	8	0	0	0	0.647259	0.755902	0.539212	0.618458
932	113.358932028546	23.1107771017656	741596.78245683	2557735.70695326	4	0.222451	0.291436	0.930218	0.858248	0.0127636	81.9446	13.9161	8	26	93	6	1	0	0.333215	0.585875	0.214237	0.470824
933	113.359247733115	23.1288283367428	741596.78245683	2559735.70695326	56	0.505179	0.250678	0.728841	0.423167	0.74657	92.7617	27.9773	26	34	33	2	3	2	0.20958	0.538945	0.0491193	0.0310234
934	113.524123597107	23.0721109661383	758596.782456831	2553735.70695326	10	0.81743	0.444177	0.948888	1.01762	0.781307	41.2498	36.1953	3	8	12	3	0	0	0.115128	0.325832	0.188621	0.259136
937	113.368531132587	23.1016052910269	742596.78245683	2556735.70695326	23	0.280004	0.352611	0.505016	0.36414	1.22562	81.9446	13.9161	2	32	15	0	7	1	0.134247	0.333636	0.197557	0.306634
939	113.544821173265	23.1349686235931	760596.782456829	2560735.70695326	24	1.79463	0.948063	7.19384	0.782485	0.120182	41.2498	36.1953	0	6	0	0	0	0	0.197041	3.64172	0.718001	1.30775
942	113.58262743112	23.2252146083135	764292.556549858	2570801.33433874	5	0.897124	2.26004	2.63728	3.19819	0.696469	41.2498	36.1953	0	0	0	0	0	0	0.966692	5.88667	1.85007	2.10279
943	113.524629477151	23.0991845888726	758596.782456831	2556735.70695326	1	0.615299	1.24768	3.7708	1.54498	0.754391	41.2498	36.1953	0	7	1	0	0	0	0.698497	1.73591	0.644466	0.635486
946	113.222467703867	23.1217876782544	727596.78245683	2558735.70695326	4	0.620003	0.487723	1.3205	0.786359	0.207487	70.6313	10.8175	6	24	73	8	0	3	0.0895952	0.555257	0.244085	0.285071
947	113.533707980193	23.062930263856	759596.782456829	2552735.70695326	45	1.99754	0.2517	0.339006	0.204986	0.339708	41.2498	36.1953	12	46	31	1	3	1	0.188871	0.881439	0.274396	0.537382
949	113.30906368728	23.0483173871419	736596.782456831	2550735.70695326	1	0.799298	0.776555	3.06483	1.28154	0.717088	81.9446	13.9161	1	8	12	0	0	0	0.303541	1.1443	0.174658	0.632865
950	113.35688767515	22.9934429703049	741596.78245683	2544735.70695326	2	0.240086	1.22413	2.33367	0.701362	0.254626	60.97	9.63692	10	27	28	4	0	1	0.110761	1.51268	0.216768	0.248128
952	113.361625651123	23.2642111505492	741596.78245683	2574735.70695326	8	1.22605	1.07892	0.510881	2.91284	0.397304	75.7477	6.80836	0	10	20	3	0	0	0.433421	4.01542	0.269361	0.37634
953	113.319901285387	23.1113560362883	737596.782456831	2557735.70695326	4	0.277374	0.142224	1.24102	0.439715	0.639155	96.5466	35.4904	3	42	17	1	1	9	0.401042	0.433052	0.383181	0.359229
955	113.214341771674	23.221216199277	726596.78245683	2569735.70695326	1	0.792142	0.683166	0.683936	2.36292	0.234537	75.7477	6.80836	4	10	19	1	0	3	0.490436	0.544029	0.335085	0.466671
959	113.554065366616	23.1077370514117	761596.689779174	2557735.61516999	2	0.521464	0.653392	5.2865	0.712051	0.191516	41.2498	36.1953	8	26	154	5	1	9	0.365598	1.58038	0.177648	0.291952
960	113.331534569866	23.2195212071004	738596.782456831	2569735.70695326	4	0.27848	0.825967	2.23299	1.34258	0.918492	75.7477	6.80836	3	4	4	1	1	5	0.401618	2.47097	0.440227	0.896959
961	113.386293314677	23.0020305106314	744596.78245683	2545735.70695326	5	0.843966	0.553022	0.664235	0.446072	0.755738	60.97	9.63692	12	48	129	9	7	11	0.254271	1.55561	0.0677266	0.259822
962	113.378765235791	23.1285349997395	743596.78245683	2559735.70695326	167	0.1636	0.149934	0.779647	0.384513	0.255799	92.7617	27.9773	41	92	444	24	6	32	0.265147	0.512537	0.0411091	0.211367
966	113.536423909134	23.2073208182563	759596.782456829	2568735.70695326	2	0.476514	1.19119	2.563	2.34542	0.344538	41.2498	36.1953	1	1	12	1	0	0	0.11575	4.72939	0.294364	1.11765
968	113.565885631065	23.2158696119196	762596.78245683	2569735.70695326	5	0.464305	1.11807	1.43375	1.28196	0.504211	41.2498	36.1953	0	3	1	0	0	0	0.333344	5.45121	0.596109	0.471854
972	113.398925218611	23.164340560516	745596.78245683	2563735.70695326	7	0.935533	1.1765	0.914728	0.329822	0.0940648	92.7617	27.9773	3	16	91	4	0	1	0.2381	0.399815	0.371641	0.203625
973	113.233874666923	23.2209397586265	728596.78245683	2569735.70695326	3	0.544912	0.432478	1.96794	2.66084	0.376263	75.7477	6.80836	5	10	68	6	0	1	0.137124	1.04818	0.122191	0.575684
974	113.318971679784	23.0572005495357	737596.782456831	2551735.70695326	13	0.356692	0.32368	1.68602	0.725105	0.485009	81.9446	13.9161	4	30	69	5	5	5	0.270498	0.228442	0.143181	0.165454
976	113.573119965952	23.1975544881846	763373.430633069	2567719.85855523	7	0.233105	0.988697	1.40286	1.34799	0.348978	41.2498	36.1953	0	5	13	2	0	0	0.180232	7.43787	0.274585	0.908855
977	113.327168004093	22.97601964395	738579.762539603	2542757.14965106	11	0.377844	0.588865	0.665907	1.13117	0.131116	60.97	9.63692	2	18	48	0	0	2	0.163333	1.13243	0.176379	0.192177
979	113.331064639736	23.1924441100028	738596.782456831	2566735.70695326	5	0.249834	0.914786	0.315192	0.314591	0.694117	75.7477	6.80836	18	66	203	15	1	7	0.395595	0.672083	0.0834107	0.224389
980	113.447237794947	23.1365143471638	750596.782456829	2560735.70695326	2	0.439286	0.379178	0.980157	0.678163	0.374631	92.7617	27.9773	0	6	21	4	0	1	0.477256	1.0084	0.445891	1.17505
986	113.386452118918	23.0110560783326	744596.78245683	2546735.70695326	11	0.245766	0.569242	1.34191	1.10585	0.222145	60.97	9.63692	7	56	123	14	0	4	0.0373057	0.559509	0.0329619	0.350242
987	113.310607304304	23.1385770413072	736596.782456831	2560735.70695326	42	0.334318	0.527732	0.674338	0.0921973	0.547244	96.5466	35.4904	33	138	58	8	7	19	0.167571	0.510412	0.0605761	0.0909612
990	113.281786054005	23.1660818958462	733596.782456831	2563735.70695326	19	0.236874	0.592409	0.721794	0.789898	0.870304	75.7477	6.80836	8	15	16	0	0	1	0.429124	0.650768	0.510133	0.551984
994	113.253862161116	23.2477393710301	730596.782456829	2572735.70695326	5	0.337533	0.11701	1.56261	0.301424	0.117165	75.7477	6.80836	4	38	122	8	3	7	0.153499	2.35265	0.085564	0.299889
995	113.253558818198	23.229687064677	730596.782456829	2570735.70695326	1	0.4942	0.66822	0.231966	1.72142	0.226047	75.7477	6.80836	2	9	38	5	1	0	0.220469	0.658887	0.278368	0.695655
998	113.386611003209	23.020081634712	744596.78245683	2547735.70695326	6	0.233426	0.438356	1.76275	1.48916	0.79929	60.97	9.63692	7	18	15	7	2	1	0.272857	0.295235	0.149408	0.315207
999	113.312469911657	23.2468871333337	736596.782456831	2572735.70695326	2	0.349076	0.32429	0.373324	1.0138	0.0967352	75.7477	6.80836	21	35	128	11	0	15	0.276178	0.621024	0.342744	0.289952
1000	113.339416814319	23.111067774023	739596.782456831	2557735.70695326	2	0.388765	0.420245	1.53917	0.639847	0.388837	81.9446	13.9161	13	27	66	0	1	19	0.13842	0.875847	0.124825	0.422091
1001	113.307834377171	22.9761088520931	736596.782456831	2542735.70695326	17	0.248888	0.341648	2.64055	1.76581	0.378471	60.97	9.63692	6	42	134	10	0	17	0.171772	1.31248	0.0924042	0.155602
1002	113.551563200108	23.1520625458899	761254.335378804	2562641.41735524	12	1.16387	1.66074	5.80418	1.28998	0.517711	41.2498	36.1953	0	0	0	0	0	0	0.90696	4.89566	1.91001	2.05506
1004	113.487439609787	23.1990762441371	754596.782456831	2567735.70695326	7	0.460803	1.42894	0.756212	1.17783	2.03771	41.2498	36.1953	0	3	0	1	0	0	0.238757	1.22595	0.850243	0.586117
1005	113.408524824367	23.1551662774634	746596.78245683	2562735.70695326	9	0.417219	0.246522	0.174672	1.11026	0.229985	92.7617	27.9773	7	34	92	7	0	2	0.0372378	0.939015	0.0881899	0.423244
1006	113.546358216529	23.2161872292013	760596.782456829	2569735.70695326	10	1.35885	1.73255	2.05123	1.73679	1.03423	41.2498	36.1953	1	0	0	0	0	0	0.766882	4.17511	1.27815	0.875919
1007	113.283320138026	23.2563419345876	733596.782456831	2573735.70695326	8	0.634382	0.464269	0.906112	0.801393	0.2388	75.7477	6.80836	6	27	85	7	1	3	0.276836	0.569928	0.251798	0.0429558
1008	113.380041680348	23.2007384652432	743596.78245683	2567735.70695326	1	0.601656	0.102104	0.0719526	0.928623	0.855728	92.7617	27.9773	0	5	26	5	4	0	0.318363	1.09307	0.553967	0.842628
1009	113.505788831046	23.1355941484307	756596.782456831	2560735.70695326	4	0.235787	2.37076	4.74849	0.656061	0.278115	41.2498	36.1953	1	8	3	0	0	0	0.471976	4.05433	0.539554	0.65231
1011	113.381162780644	23.2639158995943	743596.78245683	2574735.70695326	1	2.22364	2.66742	1.95168	1.26844	2.14022	75.7477	6.80836	0	0	0	0	0	0	1.66223	5.1455	1.73503	2.32241
1012	113.563472696039	23.0895253055028	762596.105730987	2555735.05515055	1	0.981447	1.12677	4.33873	1.5897	0.759821	41.2498	36.1953	0	1	2	0	0	0	0.338625	2.27617	0.772082	1.74969
1013	113.31866243456	23.0391486303142	737596.782456831	2549735.70695326	2	0.138829	0.412091	3.58043	0.541071	0.169555	60.97	9.63692	5	54	230	8	3	8	0.189359	0.20052	0.0791251	0.113291
1016	113.534046277933	23.0809792440845	759596.782456829	2554735.70695326	7	0.276066	0.160388	1.7616	0.71635	0.966078	41.2498	36.1953	7	6	4	0	1	2	0.189653	1.09231	0.738552	0.553993
1017	113.253255779382	23.2116347131383	730596.782456829	2568735.70695326	1	0.37082	0.313052	1.12202	0.871528	0.0324008	75.7477	6.80836	7	43	144	12	2	9	0.279678	1.39542	0.156116	0.138535
1018	113.359880094975	23.1649306705272	741596.78245683	2563735.70695326	7	0.524899	0.425855	0.267276	0.229822	0.390025	92.7617	27.9773	6	19	31	3	1	5	0.322166	1.54582	0.339824	0.488693
1019	113.457985184049	23.1905119635902	751596.78245683	2566735.70695326	1	0.624663	1.91962	2.02753	0.60327	1.08266	41.2498	36.1953	0	1	0	0	0	0	0.568054	1.24142	0.714105	1.39245
1021	113.340200151324	23.1561964085343	739596.782456831	2562735.70695326	48	0.387701	0.79424	0.326242	0.255486	0.31008	92.7617	27.9773	9	31	80	1	2	4	0.26883	1.24033	0.132704	0.468976
1023	113.437478998806	23.1366656030233	749596.782456829	2560735.70695326	19	0.390475	0.622486	0.544503	1.21529	0.454459	92.7617	27.9773	0	8	22	1	0	4	0.38065	1.96239	0.463947	0.875282
1024	113.292625713051	23.2291218220734	734596.782456831	2570735.70695326	17	0.360037	0.763415	0.814111	0.502591	0.552984	75.7477	6.80836	10	26	20	4	2	2	0.216821	0.883566	0.31494	0.312374
1025	113.544480550559	23.1169199178483	760596.782456829	2558735.70695326	1	0.574866	1.48344	5.88427	1.36761	0.198522	41.2498	36.1953	2	13	20	4	3	6	0.29349	2.32363	0.375824	0.810898
1026	113.328104808453	23.0209534611255	738596.782456831	2547735.70695326	4	0.474317	0.811134	3.65125	0.110591	0.017146	60.97	9.63692	8	59	159	17	0	13	0.193964	0.747376	0.133156	0.364519
1029	113.457325736216	23.1544123591291	751596.78245683	2562735.70695326	47	1.06258	1.06708	2.05748	0.247521	0.183963	41.2498	36.1953	1	10	19	0	1	0	0.161278	0.722378	0.760307	0.501016
1030	113.221428428127	23.0586020409062	727596.78245683	2551735.70695326	1	0.767008	0.339691	1.43763	0.55146	0.129724	70.6313	10.8175	9	10	46	1	0	0	0.458588	1.18314	0.301233	0.600025
1033	113.43813256418	23.1727658258888	749596.782456829	2564735.70695326	209	0.589691	0.794644	1.69341	0.305734	0.256624	41.2498	36.1953	0	34	11	0	1	0	0.0980645	1.07745	0.658308	0.358864
1034	113.41828517022	23.1550167010501	747596.78245683	2562735.70695326	30	0.662082	0.474333	1.07232	0.497621	0.41932	92.7617	27.9773	1	4	0	0	0	0	0.495103	1.64581	0.59773	0.604259
1037	113.281174573491	23.1299775638909	733596.782456831	2559735.70695326	7	0.110869	0.319148	0.0360191	0.143638	0.466511	96.5466	35.4904	44	100	146	20	11	13	0.186452	0.454025	0.163598	0.0924308
1039	113.350118614565	23.1650766880047	740596.78245683	2563735.70695326	2	0.421658	0.626855	0.198292	0.234372	0.319585	92.7617	27.9773	9	48	123	3	1	5	0.260875	0.771971	0.159557	0.418066
1040	113.289862298213	23.0666534365801	734596.782456831	2552735.70695326	3	0.210716	0.272149	2.63772	0.860432	0.0541278	81.9446	13.9161	17	110	204	14	1	16	0.129469	0.354952	0.162864	0.219646
1041	113.299770600335	23.0755377786812	735596.782456831	2553735.70695326	10	0.728046	0.267497	1.55168	1.06371	0.177695	81.9446	13.9161	8	33	62	9	0	7	0.264321	0.671689	0.310988	0.514779
1042	113.525474308167	23.1443070638085	758596.782456831	2561735.70695326	18	1.02066	1.34782	6.79037	1.58834	0.483434	41.2498	36.1953	0	5	2	0	0	0	0.307719	3.92981	0.497555	0.734551
1045	113.303167582622	23.2741081435765	735596.782456831	2575735.70695326	18	0.580843	0.654552	0.84358	0.686347	0.311945	75.7477	6.80836	8	22	33	2	1	1	0.104931	1.57206	0.102487	0.153891
1046	113.417799278138	23.1279410905858	747596.78245683	2559735.70695326	26	0.260542	0.172446	0.950528	1.08205	0.228461	92.7617	27.9773	8	24	155	22	0	13	0.26819	1.19948	0.249945	0.600271
1047	113.359405704455	23.1378539372157	741596.78245683	2560735.70695326	38	0.551251	0.891206	0.320181	0.0629084	0.207284	92.7617	27.9773	35	87	83	4	2	6	0.0825	0.437051	0.128949	0.101516
1048	113.496532327037	23.162823011867	755596.782456831	2563735.70695326	7	0.851754	1.07907	3.72646	0.758008	0.485133	41.2498	36.1953	1	12	17	0	0	2	0.25572	1.11447	0.37313	0.410549
1049	113.231928312266	23.1035969513888	728596.78245683	2556735.70695326	24	0.356175	0.484932	0.60735	0.598321	0.342406	70.6313	10.8175	4	11	21	2	2	2	0.211843	0.592652	0.0855277	0.308551
1050	113.318817018242	23.0481745955646	737596.782456831	2550735.70695326	6	0.750479	0.706172	2.61363	1.39548	0.89438	81.9446	13.9161	0	0	0	0	0	1	0.75193	0.705574	0.27118	0.840256
1052	113.31107190476	23.1656547172177	736596.782456831	2563735.70695326	1	0.438016	0.46913	0.965344	0.565496	0.279388	92.7617	27.9773	1	6	3	1	0	1	0.637781	1.23345	0.328105	0.663013
1058	113.415702196895	23.0106122614423	747596.78245683	2546735.70695326	1	1.02159	1.03411	0.739753	2.03921	0.639335	60.97	9.63692	0	3	0	0	0	0	0.273259	1.89608	1.51815	0.64691
1063	113.398121920047	23.1192138951248	745596.78245683	2558735.70695326	2	0.0899203	0.228281	0.574419	0.342401	0.152875	92.7617	27.9773	36	62	368	40	3	22	0.348647	0.582427	0.103462	0.266365
1064	113.346880460025	22.9851669567255	740585.246710869	2543802.55384366	1	0.701824	0.170592	1.06768	0.680551	0.285601	60.97	9.63692	5	11	14	1	0	0	0.385641	1.82463	0.59954	0.366086
1066	113.310452593044	23.1295511267162	736596.782456831	2559735.70695326	10	0.25551	0.641713	0.856208	0.233997	0.239309	96.5466	35.4904	50	123	113	4	2	14	0.107857	0.138187	0.213679	0.0970735
1067	113.303316883186	23.2990998778749	735568.042447966	2578504.17598019	4	0.329279	0.333276	0.605861	1.58999	0.587603	75.7477	6.80836	2	1	11	1	1	0	0.407027	1.11516	0.277359	0.381659
1068	113.41747575683	23.1098906266283	747596.78245683	2557735.70695326	1	0.40295	0.44952	2.5284	0.90482	0.525254	92.7617	27.9773	6	64	66	9	2	8	0.0309192	0.632449	0.206559	0.270555
1069	113.350591759515	23.1921535092445	740596.78245683	2566735.70695326	2	0.977155	0.871611	0.780456	0.816202	1.00415	92.7617	27.9773	0	0	0	0	0	0	1.09168	1.4776	0.706531	0.951843
1070	113.270201007078	23.0579088085046	732596.78245683	2551735.70695326	1	1.1119	0.937022	2.52019	1.48217	0.789406	70.6313	10.8175	0	1	2	0	0	0	0.816827	0.681273	0.954599	0.857383
1073	113.417152560693	23.0918401171203	747596.78245683	2555735.70695326	2	0.827666	1.39082	1.95761	1.04927	0.640646	81.9446	13.9161	0	0	0	0	0	0	0.661898	1.37082	0.914179	0.924782
1074	113.395563709698	22.9939180880823	745562.078645155	2544852.62524116	7	0.181107	0.0317197	0.77514	0.661468	0.506032	60.97	9.63692	0	4	3	0	0	0	0.231518	2.5916	0.738529	0.999505
1076	113.51639031177	23.1805612557251	757596.782456831	2565735.70695326	3	0.139626	1.00004	3.37986	1.78073	1.4497	41.2498	36.1953	0	5	3	1	1	0	0.194068	1.70011	0.890743	0.957896
1077	113.418123124811	23.1459915089632	747596.78245683	2561735.70695326	6	0.221582	0.544692	0.505699	0.795599	0.848231	92.7617	27.9773	5	3	0	0	1	0	0.485024	1.16044	0.285834	1.18714
1080	113.222616470739	23.1308141529864	727596.78245683	2559735.70695326	6	0.717088	0.810555	0.552896	0.717047	0.421587	70.6313	10.8175	2	22	33	5	1	1	0.256956	0.658429	0.203361	0.0620654
1082	113.298231094632	22.969623198281	735623.145803403	2542001.88333392	4	1.01862	0.407518	3.66883	0.770851	0.043016	60.97	9.63692	2	8	4	0	0	4	0.348944	2.23637	0.326159	0.438153
1083	113.224707070469	23.2571836181141	727596.78245683	2573735.70695326	1	0.770943	1.84554	1.88522	2.78315	0.298592	75.7477	6.80836	0	6	43	3	0	0	0.305048	2.31011	0.338551	0.432805
1085	113.360355200745	23.1920073016011	741596.78245683	2566735.70695326	3	0.673249	1.04377	0.123141	1.11207	0.642604	92.7617	27.9773	4	18	32	2	1	5	0.588134	0.535902	0.187621	0.456358
1087	113.534893512675	23.1261014936929	759596.782456829	2559735.70695326	4	1.5753	0.466207	6.38683	0.395618	0.256092	41.2498	36.1953	1	12	16	1	0	0	0.134643	3.41909	0.345924	0.0839435
1089	113.327485284792	22.9848496470624	738596.782456831	2543735.70695326	7	0.189914	0.479477	1.26647	1.29805	0.236811	60.97	9.63692	6	10	21	1	1	1	0.268896	0.914188	0.220886	0.545975
1090	113.406593454034	23.0468624420017	746596.78245683	2550735.70695326	12	0.477002	0.847246	0.011093	0.165677	1.1529	60.97	9.63692	3	22	109	6	2	6	0.358317	0.650551	0.272905	0.296488
1091	113.370437006097	23.2099113923335	742596.78245683	2568735.70695326	1	0.554526	1.08759	0.951995	0.840568	0.562775	92.7617	27.9773	0	1	13	1	0	0	0.189671	2.10149	0.530559	0.608109
1092	113.290627407643	23.1117839106087	734596.782456831	2557735.70695326	3	0.130471	0.0932452	0.164443	0.373258	1.29678	96.5466	35.4904	7	28	12	1	4	1	0.2829	0.363391	0.0737144	0.362098
1093	113.377493913304	23.0563308070955	743596.78245683	2551735.70695326	7	0.266073	0.106794	0.0640016	0.235792	0.694542	81.9446	13.9161	0	18	6	2	2	2	0.236539	0.743693	0.378145	0.628283
1096	113.303012359469	23.2650823368291	735596.782456831	2574735.70695326	12	0.266147	0.160216	1.02958	0.300708	0.178239	75.7477	6.80836	4	28	111	16	0	10	0.175072	2.09118	0.201462	0.349492
1097	113.428534018799	23.181941833155	748596.782456829	2565735.70695326	41	0.96115	0.427487	1.59339	0.393022	0.706017	92.7617	27.9773	2	10	17	1	0	1	0.371	0.861205	0.285443	1.1327
1098	113.380201596671	23.2097638472102	743596.78245683	2568735.70695326	2	0.476112	1.09496	0.459186	1.23882	0.577903	92.7617	27.9773	2	13	113	5	1	8	0.126917	2.06882	0.243615	0.13956
1099	113.5538955385	23.0987135519778	761596.78245683	2556735.70695326	2	0.478128	1.03337	4.41689	0.827418	0.194141	41.2498	36.1953	3	14	51	7	0	1	0.173719	1.21403	0.419865	0.341889
1101	113.302702146424	23.2470306892851	735596.782456831	2572735.70695326	1	0.498853	0.55254	0.548076	0.433667	0.152086	75.7477	6.80836	0	10	50	5	0	1	0.130474	1.51651	0.194844	0.347174
1102	113.396202225395	23.0109087388633	745596.78245683	2546735.70695326	7	0.0403845	0.495541	1.19082	1.75025	0.595718	60.97	9.63692	5	16	91	12	1	8	0.0567677	1.00139	0.12886	0.554078
1104	113.271719361697	23.1481708144288	732596.78245683	2561735.70695326	6	0.0141589	0.132237	0.564172	0.275286	0.974886	96.5466	35.4904	20	30	13	1	3	2	0.258568	1.0298	0.0712557	0.342517
1105	113.273245364018	23.2384316923931	732596.78245683	2571735.70695326	3	0.107217	0.653047	1.72874	0.180176	0.042775	75.7477	6.80836	19	23	174	17	0	11	0.11092	1.48949	0.0994522	0.57476
1106	113.292317431983	23.2110699601053	734596.782456831	2568735.70695326	3	0.47863	0.0835476	0.685821	0.523999	0.226423	75.7477	6.80836	11	27	29	1	1	0	0.269728	0.873791	0.480125	0.25915
1107	113.30764832384	22.9691279404321	736589.862480273	2541962.18557018	9	0.259696	0.103905	2.7318	1.71921	0.671024	60.97	9.63692	3	14	80	4	1	9	0.215205	1.99706	0.461106	0.175932
1108	113.369800438253	23.1738095404331	742596.78245683	2564735.70695326	1	0.477359	1.40485	0.838054	0.723103	0.545038	92.7617	27.9773	0	4	3	0	0	0	0.734321	1.77505	0.972108	0.894676
1109	113.360196752643	23.1829817692757	741596.78245683	2565735.70695326	23	0.331238	1.22341	0.572286	0.50392	0.336036	92.7617	27.9773	5	31	9	0	1	2	0.113708	0.836163	0.158736	0.865824
1110	113.349803580361	23.1470254170812	740596.78245683	2561735.70695326	159	0.252932	0.340561	0.356226	0.0309725	0.287336	92.7617	27.9773	10	56	28	3	6	10	0.22197	0.625038	0.323693	0.582822
1111	113.318199150441	23.0120706669228	737596.782456831	2546735.70695326	5	0.232373	0.142454	2.54817	1.2794	0.137004	60.97	9.63692	15	35	120	9	1	10	0.229932	0.720618	0.039773	0.314466
1112	113.272634043906	23.202327476795	732596.78245683	2567735.70695326	7	0.22343	0.70693	0.178929	0.453465	0.237293	75.7477	6.80836	16	49	129	14	2	12	0.138359	0.845093	0.347515	0.201531
1113	113.215684880524	23.3024534899716	726596.78245683	2578735.70695326	1	0.780029	1.86019	2.42341	0.489062	0.999471	75.7477	6.80836	0	2	3	1	0	0	0.400513	6.89829	1.34608	0.430007
1121	113.302237409656	23.2199531329012	735596.782456831	2569735.70695326	9	0.158986	0.433209	0.746604	0.815809	0.243505	75.7477	6.80836	28	95	392	25	1	36	0.0897214	0.335873	0.0677043	0.154896
1122	113.341142756172	23.2103503956992	739596.782456831	2568735.70695326	15	1.05186	0.768648	1.94322	1.78399	1.27284	75.7477	6.80836	3	3	4	1	0	2	0.483405	2.05729	1.01624	1.13134
1130	113.234927975117	23.2841235582531	728596.78245683	2576735.70695326	2	0.859623	0.877699	0.723746	0.604342	0.143894	75.7477	6.80836	0	2	3	3	0	0	0.678881	5.31532	0.427999	0.797823
1131	113.262565355409	23.1844160035466	731596.782456829	2565735.70695326	3	0.514782	0.313698	1.05619	1.07224	0.904235	75.7477	6.80836	11	49	151	12	5	30	0.224726	0.201599	0.16971	0.162617
1132	113.349017378645	23.1018970413136	740596.78245683	2556735.70695326	10	0.626777	0.5204	0.896232	0.800262	0.281446	81.9446	13.9161	3	29	4	0	1	0	0.369434	0.556904	0.414093	0.424469
1133	113.42723276226	23.1097407724712	748596.782456829	2557735.70695326	7	0.264124	0.422955	1.84444	0.909143	0.85562	92.7617	27.9773	7	40	71	12	2	9	0.236107	1.01752	0.160899	0.341011
1135	113.329970884587	23.1292638198315	738596.782456831	2559735.70695326	71	0.105954	0.0576211	0.533436	0.743325	0.81362	92.7617	27.9773	30	127	370	28	6	54	0.199493	0.419657	0.181882	0.129831
1136	113.406433032263	23.0378370484952	746596.78245683	2549735.70695326	1	0.0925432	1.42493	0.452533	0.45484	0.813491	60.97	9.63692	3	17	15	0	7	4	0.253743	0.827314	0.197698	0.56889
1137	113.243490175461	23.2117743875563	729596.782456829	2568735.70695326	5	0.217657	0.310501	2.05187	1.5118	0.0767617	75.7477	6.80836	9	19	78	9	2	5	0.141658	1.09409	0.0322169	0.356309
1138	113.397801165429	23.1011631493207	745596.78245683	2556735.70695326	3	0.47955	0.922067	1.36279	1.2537	0.564294	81.9446	13.9161	1	1	7	0	0	0	0.709698	0.990894	0.580568	0.787447
1139	113.2141929111	23.2121897772892	726596.78245683	2568735.70695326	2	0.711749	0.607374	0.364193	1.42349	0.160322	75.7477	6.80836	2	6	12	0	0	0	0.168358	0.777384	0.430774	1.14602
1140	113.293088714756	23.2561995300542	734596.782456831	2573735.70695326	11	0.322363	0.703905	0.157464	0.118688	0.0781826	75.7477	6.80836	8	46	119	10	0	12	0.244964	1.40688	0.110093	0.329687
1141	113.49619771426	23.1447736969952	755596.782456831	2561735.70695326	9	0.614488	1.3467	4.68484	0.879089	0.644182	41.2498	36.1953	0	0	1	0	0	0	0.0652177	3.05155	0.54549	0.588735
1142	113.251895863109	23.1303985728194	730596.782456829	2559735.70695326	11	0.0876085	0.248801	0.464724	0.177971	0.389941	70.6313	10.8175	48	167	268	26	9	25	0.111311	0.596858	0.0648196	0.0811908
1144	113.312781437732	23.264938656584	736596.782456831	2574735.70695326	2	0.69047	0.676528	1.33936	0.818753	0.194387	75.7477	6.80836	1	8	66	8	0	2	0.40571	1.51831	0.365721	0.934127
1146	113.377970059768	23.083407464429	743596.78245683	2554735.70695326	4	0.773369	0.65732	1.75684	0.663792	0.274372	81.9446	13.9161	4	9	20	0	1	1	0.338083	0.26781	0.380652	1.17125
1148	113.231630000135	23.0855440431641	728596.78245683	2554735.70695326	4	0.323499	0.617709	1.29002	0.396934	0.699221	70.6313	10.8175	15	55	31	3	0	2	0.263909	0.298071	0.501508	0.315945
1150	113.205763533176	23.2935649571374	725596.78245683	2577735.70695326	2	0.582503	1.43835	1.73942	1.49861	1.20572	75.7477	6.80836	0	0	0	0	0	0	0.915198	6.29537	1.38246	0.990353
1151	113.232077580902	23.1126233886578	728596.78245683	2557735.70695326	2	0.417211	0.315983	0.533635	1.11456	0.46301	70.6313	10.8175	12	37	39	3	2	9	0.234628	0.239019	0.0344021	0.456934
1152	113.241536310544	23.0944322168979	729596.782456829	2555735.70695326	3	0.119288	0.4534	0.310518	0.0645248	0.0841297	70.6313	10.8175	14	38	98	5	2	6	0.0873121	0.692519	0.185615	0.246316
1154	113.214490706938	23.2302426100034	726596.78245683	2570735.70695326	1	1.13305	0.994044	1.67419	3.33773	0.330915	75.7477	6.80836	2	12	15	4	0	1	0.199151	0.690371	0.202276	0.228136
1156	113.261806960051	23.1392850618403	731596.782456829	2560735.70695326	9	0.123009	0.300064	0.739194	0.303707	0.441198	96.5466	35.4904	12	49	61	6	17	4	0.0539088	0.0490493	0.0543875	0.0359462
1159	113.313093276167	23.2829901343982	736596.782456831	2576735.70695326	5	0.546328	0.80224	1.73344	1.69291	0.47929	75.7477	6.80836	1	10	49	7	0	2	0.145764	1.22025	0.22921	0.679436
1160	113.270959229848	23.1030399522346	732596.78245683	2556735.70695326	13	0.103026	0.0737469	0.560217	0.413307	0.268245	81.9446	13.9161	70	148	197	22	4	27	0.104941	0.27975	0.0600161	0.0115318
1162	113.254165808317	23.2657916321689	730596.782456829	2574735.70695326	2	0.369777	0.522092	0.703816	2.0881	0.411288	75.7477	6.80836	2	7	38	1	0	3	0.0545358	2.72545	0.317936	1.31166
1165	113.446582936844	23.1004142044137	750596.782456829	2556735.70695326	1	0.474839	0.1906	0.348257	0.74012	0.383551	41.2498	36.1953	18	64	208	9	5	19	0.100688	0.265849	0.0811167	0.0871557
1166	113.319591105013	23.093304252552	737596.782456831	2555735.70695326	15	0.242507	1.17537	0.34243	0.318761	0.203656	81.9446	13.9161	19	88	306	21	6	26	0.308793	0.276574	0.11381	0.231177
1169	113.389003889731	23.1554636192668	744596.78245683	2562735.70695326	2	0.823143	1.1794	1.54658	1.179	0.231552	92.7617	27.9773	1	9	4	2	0	0	0.133115	1.62322	0.563607	0.397419
1170	113.244850337728	23.2930101585678	729596.782456829	2577735.70695326	7	1.29577	1.35212	1.77003	1.10857	0.408983	75.7477	6.80836	1	4	15	1	0	0	0.485374	4.66833	0.435084	0.568897
1172	113.290933990538	23.1298360212788	734596.782456831	2559735.70695326	25	0.24101	0.667682	0.0358245	0.0581553	0.601958	96.5466	35.4904	32	95	88	6	11	5	0.186843	0.478004	0.114635	0.137253
1177	113.241236847565	23.0763794065457	729596.782456829	2553735.70695326	7	0.287145	0.394868	0.265546	1.73107	0.257274	70.6313	10.8175	25	41	72	6	2	4	0.397236	0.379985	0.292837	0.374099
1178	113.252499511598	23.1665036367948	730596.782456829	2563735.70695326	3	0.244433	0.540652	0.471794	0.135555	0.357619	96.5466	35.4904	43	108	216	18	2	13	0.171621	0.80829	0.0388563	0.152674
1179	113.215385888234	23.2844008376704	726596.78245683	2576735.70695326	4	0.139259	0.343989	0.423414	1.69191	0.904363	75.7477	6.80836	0	1	70	2	0	0	0.539653	5.18373	0.0528442	0.927146
1180	113.426746138454	23.0826651865777	748596.782456829	2554735.70695326	1	0.211714	0.603187	0.651974	1.75291	0.38282	41.2498	36.1953	1	2	10	1	3	0	0.226833	0.782692	0.160887	0.408215
1181	113.321145129622	23.1835627187379	737596.782456831	2565735.70695326	1	0.264927	0.936975	0.35555	1.02398	0.953657	75.7477	6.80836	20	47	207	17	0	15	0.265303	0.472941	0.112267	0.17835
1182	113.536594380323	23.2163451300398	759596.782456829	2569735.70695326	2	1.06801	1.86534	2.87811	2.589	0.597959	41.2498	36.1953	0	0	0	0	0	0	0.992352	3.78014	0.964429	1.11637
1185	113.309371789681	23.0663694082632	736596.782456831	2552735.70695326	3	0.367294	0.727159	1.84835	0.803116	0.493792	81.9446	13.9161	9	40	122	12	3	7	0.0476043	1.12686	0.0773668	0.419613
1188	113.416668375762	23.0647642675159	747596.78245683	2552735.70695326	4	0.75	0.532443	0.269325	0.55757	1.20725	41.2498	36.1953	0	2	2	0	0	0	0.405991	0.82087	0.641189	0.81509
1191	113.406753956602	23.0558878241549	746596.78245683	2551735.70695326	3	0.383905	0.455546	0.168265	0.449252	0.157156	60.97	9.63692	0	17	10	0	4	0	0.0497899	1.42428	0.286174	0.961451
1196	113.467416535793	23.1723094572943	752596.782456831	2564735.70695326	37	0.153262	0.21738	0.585686	0.648223	0.851971	41.2498	36.1953	5	22	98	7	0	6	0.223723	0.121109	0.152935	0.136312
1197	113.367109255106	23.0203746428575	742596.78245683	2547735.70695326	6	0.300553	0.529977	1.95258	0.711089	0.342104	60.97	9.63692	4	24	63	9	0	0	0.356716	0.410132	0.224157	0.813533
1198	113.369959460419	23.1828350204749	742596.78245683	2565735.70695326	3	0.171096	1.1764	1.11816	0.428915	0.450675	92.7617	27.9773	0	0	1	0	1	1	0.608762	0.852389	0.44597	0.603651
1199	113.369482633369	23.1557585462381	742596.78245683	2562735.70695326	17	1.04512	0.679607	0.44578	0.172225	0.543696	92.7617	27.9773	1	7	3	1	0	0	0.494577	1.80515	0.944407	0.585137
1201	113.322706975051	23.2738200514923	737596.782456831	2575735.70695326	3	0.255266	0.31274	2.72369	1.33598	0.17478	75.7477	6.80836	9	22	101	6	1	7	0.353631	0.342989	0.117737	0.540268
1202	113.545162138447	23.1530172832929	760596.782456829	2562735.70695326	34	0.886283	1.28937	5.84857	1.21811	0.120922	41.2498	36.1953	0	5	0	0	0	0	0.266741	4.90539	1.6007	1.39942
1206	113.278892447783	22.9945847135218	733596.782456831	2544735.70695326	3	0.332799	0.840621	2.57604	1.61983	0.699383	60.97	9.63692	1	6	10	0	0	0	0.191974	0.0855555	0.292201	0.592059
1208	113.514537915187	23.0812911916348	757596.782456831	2554735.70695326	22	0.301569	0.542546	2.36148	2.24374	0.331924	41.2498	36.1953	7	24	52	9	1	2	0.153581	0.425952	0.0814743	0.247475
1209	113.437152708337	23.1186154230815	749596.782456829	2558735.70695326	7	0.375795	0.819985	2.25071	0.371808	0.187054	41.2498	36.1953	5	12	8	1	0	2	0.122135	1.69428	0.88297	0.5358
1212	113.262011202752	23.0227725291962	731817.543530883	2547830.98365895	4	1.27615	1.71163	3.37635	1.99275	1.05094	60.97	9.63692	0	0	0	0	0	0	1.1426	1.0912	2.01219	1.41949
1213	113.505453419363	23.1175448992853	756596.782456831	2558735.70695326	1	1.78338	1.94435	3.29692	1.82658	0.754023	41.2498	36.1953	0	2	0	0	0	0	1.03617	3.05717	0.989571	1.81707
1216	113.328415038892	23.0390053005127	738596.782456831	2549735.70695326	1	0.601119	0.456397	3.50105	1.46781	0.183238	60.97	9.63692	1	27	59	1	0	9	0.312034	0.744345	0.218047	0.207682
1218	113.32794981042	23.0119275245153	738596.782456831	2546735.70695326	4	0.0939714	0.990194	3.54729	0.395585	0.256447	60.97	9.63692	15	42	155	12	0	13	0.423094	0.904031	0.0626754	0.198377
1219	113.241686155061	23.1034586052245	729596.782456829	2556735.70695326	23	0.21071	0.277141	0.648502	0.361836	0.620799	70.6313	10.8175	3	32	32	0	7	2	0.432202	0.633231	0.330314	0.313293
1223	113.241087229058	23.0673529845273	729596.782456829	2552735.70695326	6	0.197162	0.614011	1.25366	1.02485	0.545979	70.6313	10.8175	17	16	40	12	0	11	0.481766	0.579839	0.167541	0.0394237
1224	113.309525957239	23.0753954019077	736596.782456831	2553735.70695326	4	0.273251	0.312814	1.83447	1.42864	0.357898	81.9446	13.9161	2	37	1	0	1	0	0.288132	0.585489	0.684037	0.339525
1225	113.506292580962	23.1626679360691	756596.782456831	2563735.70695326	112	0.619075	0.61476	4.6198	0.900515	0.408712	41.2498	36.1953	3	8	4	1	0	0	0.319319	1.1544	0.346985	0.627763
1226	113.523955140036	23.0630864022872	758596.78245683	2552735.70695326	12	0.997555	0.480121	0.405218	0.435844	0.241402	41.2498	36.1953	3	34	8	1	2	2	0.143336	0.128344	0.211648	0.203222
