# Supplementary material for: Investigation on spatiotemporal evolution and influencing factors of urban innovation space: a case study of Guangzhou
Source: Research Square preprint supplement (doi:10.21203/rs.3.rs-8356472/v1), 2026-01-16
Supplement: Supplementary file 2 [file MGWR_Raw_data.xls]

## Sheet: Sheet1
FID	JWDZBX	JWDZBY	TYZBX	TYZBY	YBL	YBL	SR	PP	UR	RI	IP	ISH	DOED	LC	VC	CAF	SAC	BS	MS	SEAC	LE	BH	FC
0	113.280411949751	23.0848468951679	733596.782456831	2554735.70695326	4	1.38629	-0.57023	-0.80157	-1.03523	-0.50431	-0.76768	0.96273	-0.43373	3.28197	2.82175	2.54305	3.97729	1.79486	3.80763	-1.05651	-0.93177	-0.96925	-0.85029
1	113.565425249772	23.1731296365036	762633.197058506	2565000.15966394	0		0.0143	0.69802	1.03838	0.11398	-0.2704	0.8542	1.33731	-0.50982	-0.62608	-0.59371	-0.60864	-0.40964	-0.49348	1.47827	2.3062	0.79844	1.5148
2	113.209265833258	23.3075303297044	725931.502472649	2579287.98602896	0		0.65955	1.86319	0.77942	-0.09645	-0.40827	-1.12898	-0.99874	-0.50982	-0.62608	-0.59371	-0.60864	-0.40964	-0.49348	0.14817	2.64815	1.62244	0.22293
3	113.1511606772	23.2946417220482	720008.607332695	2577770.93306832	0		1.20639	1.57099	3.06628	4.381	2.84985	-1.12898	-0.99874	-0.50982	-0.62608	-0.59371	-0.60864	-0.40964	-0.49348	2.00998	3.98075	5.66644	4.98435
4	113.553724876401	23.0896892273999	761596.78245683	2555735.70695326	2	0.693147	0.49086	-0.99081	1.18021	0.18693	0.09988	0.8542	1.33731	-0.50982	-0.49347	-0.56369	-0.60864	-0.40964	-0.49348	-0.75546	-0.3119	-0.09402	0.60038
5	113.215087195325	23.2663481402228	726596.78245683	2574735.70695326	6	1.79176	-0.10128	-0.64079	-1.03201	1.04985	-0.86319	-1.12898	-0.99874	-0.41734	-0.46032	-0.12845	0.09689	0.03126	-0.49348	-0.2687	0.70836	-0.45538	-0.84665
6	113.231779118684	23.0945705028896	728596.78245683	2555735.70695326	7	1.94591	-0.81707	-0.71374	-1.09833	-0.83259	-0.24394	0.36414	-0.68004	1.70976	2.25816	2.37796	2.03709	0.91306	3.17043	-0.95451	-0.76934	-0.8015	-0.8936
7	113.426584093645	23.0736399685051	748596.782456829	2553735.70695326	0		-0.56759	-0.76421	-1.12849	-0.30948	0.56411	0.8542	1.33731	-0.50982	-0.49347	-0.2335	-0.07949	0.47216	-0.33418	-0.91114	-0.86631	-0.79197	-0.70513
8	113.289709507196	23.0576273079715	734596.782456831	2551735.70695326	0		0.45274	-0.02785	1.00351	-0.41231	-0.71167	0.96273	-0.43373	-0.32486	-0.1951	-0.20349	-0.43226	0.03126	-0.17488	-0.2271	-0.67639	-0.43741	-0.05789
9	113.192534476991	23.0602725364385	724632.658429347	2551876.02632765	0		-0.27238	-0.29082	0.60428	-0.89277	-0.21583	0.36414	-0.68004	-0.50982	-0.59293	-0.59371	-0.60864	-0.40964	-0.49348	0.38219	-0.74575	0.13383	0.00888
10	113.387884962184	23.0922856777167	744596.78245683	2555735.70695326	0		-0.86268	-0.39466	-0.71519	-0.23548	-0.94962	0.96273	-0.43373	0.32252	0.26903	0.17172	-0.43226	0.03126	-0.33418	-0.75685	-0.74787	-0.83775	-0.38115
11	113.242136140992	23.1305377027627	729596.782456829	2559735.70695326	19	2.94444	-0.48594	-0.76452	-0.39064	-1.16276	-0.98485	0.36414	-0.68004	4.2068	2.72229	2.24288	1.15518	3.55846	3.64833	-1.10197	-0.79258	-0.72506	-0.88916
12	113.2798032305	23.0487421574502	733596.782456831	2550735.70695326	3	1.09861	-0.23718	-0.38322	1.25611	0.14733	-0.5568	-1.11886	-0.77389	-0.41734	-0.26141	0.27678	0.9788	-0.40964	1.25882	-0.50883	-0.30548	-0.64582	-0.74681
13	113.50595666334	23.1446187557912	756596.782456831	2561735.70695326	1	0	-0.36144	0.7393	2.50624	-0.42677	-0.39179	0.8542	1.33731	-0.41734	0.03696	-0.30855	-0.43226	-0.40964	-0.17488	-0.98948	0.64157	-0.51249	0.04735
14	113.331221204522	23.2014698203863	738596.782456831	2567735.70695326	14	2.63906	-0.87439	-0.93561	-0.86668	-0.6456	-1.042	-1.12898	-0.99874	0.59997	0.30218	0.83209	0.44965	0.91306	0.46232	-0.85736	-0.7089	-0.82298	-1.06394
15	113.298697597506	23.0123551527423	735596.782456831	2546735.70695326	8	2.07944	-0.34654	-0.55513	-0.98332	-0.07719	-0.92304	-1.11886	-0.77389	0.32252	-0.09565	0.98218	0.80242	-0.40964	0.30302	-0.44134	-0.4218	-0.59431	-0.53826
16	113.293552413143	23.2832771359824	734596.782456831	2576735.70695326	1	0	-0.89093	-0.95309	-0.45146	0.08644	-0.16824	-1.12898	-0.99874	-0.23238	-0.42717	0.09668	1.86071	0.03126	-0.49348	0.39764	-0.56342	-0.62938	-0.26156
17	113.288642122088	22.9944440926621	734596.782456831	2544735.70695326	1	0	-0.73992	0.25192	0.15981	-0.62349	-0.41282	-1.11886	-0.77389	-0.41734	-0.46032	-0.54868	-0.60864	-0.40964	-0.49348	-0.42718	-0.61528	-0.33809	0.53357
18	113.317890683238	22.9940186349985	737596.782456831	2544735.70695326	3	1.09861	-0.38383	-0.30319	0.50303	0.52188	0.15538	-1.11886	-0.77389	-0.50982	-0.55978	-0.59371	-0.60864	-0.40964	-0.01558	0.40693	-0.6417	-0.21952	0.09928
19	113.468245150663	23.2174334882689	752596.782456831	2569735.70695326	0		1.44495	3.25253	0.7975	1.44981	0.89625	0.8542	1.33731	-0.32486	-0.62608	-0.56369	-0.60864	-0.40964	-0.49348	0.14198	0.21119	2.15046	3.05091
20	113.263782753654	23.2566249232063	731596.782456829	2573735.70695326	5	1.60944	-1.11418	-0.93938	-0.02292	0.0789	-0.49938	-1.12898	-0.99874	-0.41734	-0.29456	-0.29354	-0.25588	-0.40964	-0.49348	-0.61989	-0.09982	-0.07413	-0.59806
21	113.320989375609	23.1745369230635	737596.782456831	2564735.70695326	0		-0.43993	0.43727	-1.29061	-0.57191	-0.79969	0.96955	0.68404	1.43231	0.50109	0.74204	0.62603	0.47216	0.46232	-0.85446	-1.0237	-0.9661	-0.97257
22	113.25223643556	23.0040903445991	730847.251279607	2545746.30275575	0		0.83753	-0.22422	1.70039	1.43635	1.52137	-1.11886	-0.77389	-0.50982	-0.62608	-0.59371	-0.60864	-0.40964	-0.49348	1.05119	-0.1718	0.64941	1.62122
23	113.455846815532	23.0731875802026	751596.78245683	2553735.70695326	0		0.50982	0.04394	0.72123	0.80465	2.0674	0.8542	1.33731	-0.50982	-0.62608	-0.59371	-0.60864	-0.40964	-0.49348	3.36444	-0.20142	0.60005	1.13742
24	113.425936729395	23.0375389824396	748596.782456829	2549735.70695326	8	2.07944	-0.70425	-0.69016	-0.97517	0.35742	-0.24099	-1.11886	-0.77389	-0.41734	-0.59293	0.33681	-0.43226	0.03126	-0.49348	-0.28478	-0.26715	-0.47015	-0.26761
25	113.214721716458	23.1308088895843	726788.084598753	2559722.81597368	0		1.49252	-0.18738	-0.53298	-0.24277	-0.50996	0.36414	-0.68004	-0.32486	-0.26141	-0.50366	-0.60864	0.03126	-0.01558	-0.14308	-0.75966	0.11524	-0.69967
26	113.458150253002	23.1995368360771	751596.78245683	2567735.70695326	3	1.09861	-0.8024	1.59957	0.75411	-0.41108	-0.74522	0.8542	1.33731	-0.50982	-0.62608	-0.5787	-0.60864	-0.40964	-0.49348	-0.95498	-0.04915	0.70889	1.41436
27	113.524460765639	23.0901600594347	758596.782456831	2555735.70695326	3	1.09861	-0.32814	-0.7085	0.59538	-0.27674	-0.69942	0.8542	1.33731	-0.32486	-0.29456	-0.06841	-0.07949	-0.40964	-0.33418	0.00146	-0.54701	-0.25115	-0.42893
28	113.497873945065	23.2438901303873	755579.848435659	2572718.32536712	0		4.90171	5.01981	0.63678	2.42474	6.06879	0.8542	1.33731	-0.50982	-0.62608	-0.59371	-0.60864	-0.40964	-0.49348	2.22937	0.58756	3.41938	3.57645
29	113.516052750501	23.162512256549	757596.782456831	2563735.70695326	96	4.56435	-0.98541	-0.69792	2.16605	-0.89925	-0.63368	0.8542	1.33731	-0.50982	-0.46032	-0.51866	-0.60864	-0.40964	-0.33418	-0.43434	-0.06362	0.22182	-0.91712
30	113.213152976499	23.1490045083572	726596.78245683	2561735.70695326	0		0.36072	-0.82351	-0.49745	-0.3762	0.41332	0.36414	-0.68004	-0.04741	-0.29456	-0.41361	-0.25588	-0.40964	-0.01558	-0.31169	-0.83992	-0.38418	-0.2879
31	113.322550437905	23.2647943693254	737596.782456831	2574735.70695326	7	1.94591	-0.07797	-0.34394	0.04642	-0.57616	-0.47177	-1.12898	-0.99874	-0.13989	0.30218	0.83209	1.15518	-0.40964	0.46232	-0.28248	-0.32077	-0.83497	-0.53406
32	113.194956201726	23.2305167458087	724596.78245683	2570735.70695326	4	1.38629	-1.19727	0.66038	0.54635	2.2825	-0.48331	-1.12898	-0.99874	-0.04741	-0.16195	0.29179	0.27327	-0.40964	0.30302	-0.09112	-0.68266	-0.76991	-0.66826
33	113.263325656771	23.2295466630981	731596.782456829	2570735.70695326	3	1.09861	-0.14146	-0.17085	-0.77151	-0.14586	-0.62448	-1.12898	-0.99874	-0.23238	-0.02934	-0.27853	-0.25588	0.03126	-0.33418	-0.55437	-0.79672	-0.52418	-0.0666
34	113.270655711809	23.0849875285014	732596.78245683	2554735.70695326	15	2.70805	-0.25931	-0.42757	-0.99079	-0.79213	-0.75395	0.96273	-0.43373	1.80225	2.05925	0.87712	1.68433	-0.40964	2.21462	-0.93112	-1.02036	-0.94169	-0.93132
35	113.544310367571	23.1078955477183	760596.782456829	2557735.70695326	6	1.79176	-0.58114	0.1553	2.10252	-0.91484	-0.37676	0.8542	1.33731	1.06238	1.23044	1.74761	2.56624	0.47216	3.32973	-0.86488	-0.32739	-0.75556	-0.98227
36	113.39973053675	23.2094669410819	745596.78245683	2568735.70695326	2	0.693147	-0.16962	0.57106	-0.18418	0.90674	0.23375	0.96955	0.68404	-0.50982	-0.62608	-0.59371	-0.60864	-0.40964	-0.49348	1.66032	-0.05155	0.84716	0.67977
37	113.261352836536	23.1122063615708	731596.782456829	2557735.70695326	3	1.09861	-1.11628	-0.62899	-0.94493	-1.15444	0.0228	1.03026	1.28127	1.5248	1.99294	1.28234	5.74111	0.91306	0.78092	-1.01648	-0.84967	-0.90783	-1.07846
38	113.51521032937	23.1173895574933	757596.782456831	2558735.70695326	0		0.55847	0.69072	1.55957	-0.21722	0.4886	0.8542	1.33731	-0.41734	-0.55978	-0.59371	-0.60864	-0.40964	-0.49348	-0.08168	0.94426	0.71085	0.64791
39	113.273398385753	23.247457718012	732596.78245683	2572735.70695326	2	0.693147	-0.74356	-0.58587	-0.45594	-0.47166	-0.94754	-1.12898	-0.99874	-0.13989	0.30218	1.88268	3.62453	-0.40964	1.41812	-0.72574	-0.16843	-0.76743	-0.895
40	113.368214602983	23.0835541151793	742596.78245683	2554735.70695326	0		-0.51286	-0.61253	-0.62382	-0.85178	-1.0377	0.96273	-0.43373	-0.23238	0.07011	-0.0534	0.09689	-0.40964	-0.49348	-0.73671	-0.76851	-0.77089	-0.38052
41	113.321612861003	23.2106400377407	737596.782456831	2568735.70695326	0		-0.10558	-0.0716	-0.50655	-0.55495	-0.02499	-1.12898	-0.99874	0.23004	-0.22826	-0.29354	0.27327	-0.40964	-0.33418	-0.19157	-0.22467	-0.45149	0.01646
42	113.369323850604	23.1467330320923	742596.78245683	2561735.70695326	21	3.04452	0.23228	-0.33742	-0.9385	-0.90532	-0.24023	0.96955	0.68404	-0.04741	-0.26141	-0.45863	0.09689	-0.40964	-0.49348	0.09582	-0.09572	-0.41424	-0.78947
43	113.371234514262	23.2550384509877	742596.78245683	2573735.70695326	0		0.46833	0.50376	-0.95446	1.01114	0.66139	-1.12898	-0.99874	-0.50982	-0.59293	-0.59371	-0.43226	-0.40964	-0.49348	2.3684	1.91756	-0.0032	0.83414
44	113.467085671724	23.1542597646846	752596.782456831	2562735.70695326	107	4.67283	0.36269	0.1337	0.10647	-0.56231	-0.2922	0.8542	1.33731	-0.50982	-0.52663	-0.59371	-0.60864	-0.40964	-0.49348	-0.54463	-0.55103	0.21253	0.25102
45	113.404017221296	22.9955298370655	746426.050077181	2545045.3472747	0		0.27682	-0.25169	-0.46268	-0.34756	0.10422	-1.11886	-0.77389	-0.50982	-0.62608	-0.59371	-0.60864	-0.40964	-0.49348	0.06037	0.51135	0.17355	0.24411
46	113.351065617404	23.2192302282217	740596.78245683	2569735.70695326	0		0.87441	-0.73355	-0.45316	0.1596	0.30882	0.96955	0.68404	-0.50982	-0.62608	-0.59371	-0.60864	-0.40964	-0.49348	0.84619	0.85944	0.31701	0.39778
47	113.495529496607	23.1086749296288	755596.782456831	2557735.70695326	0		-0.53526	-0.26149	-0.0231	0.99739	0.60442	0.8542	1.33731	-0.50982	-0.59293	-0.56369	-0.60864	-0.40964	-0.49348	0.36507	-0.1516	0.83041	1.71309
48	113.371300681755	23.2721381614277	742572.574849558	2575629.93743599	0		1.41563	1.56146	-0.16934	0.29221	0.71591	-1.12898	-0.99874	-0.50982	-0.62608	-0.59371	-0.60864	-0.40964	-0.49348	2.65179	1.04612	0.58679	0.98477
49	113.270807432658	23.0940137459969	732596.78245683	2555735.70695326	7	1.94591	-0.90199	-0.57993	-0.92935	-1.13708	-0.13352	0.96273	-0.43373	5.40907	3.88262	5.01944	5.91749	0.91306	5.71923	-0.59117	-0.86428	-0.84839	-1.05733
50	113.252186534938	22.9770966950643	730888.061039193	2542756.42268306	0		0.18343	-0.40704	2.76042	0.45637	0.20511	-1.11886	-0.77389	-0.50982	-0.62608	-0.59371	-0.60864	-0.40964	-0.49348	1.10463	-0.59719	0.03298	0.17625
51	113.368689516828	23.1106308619392	742596.78245683	2557735.70695326	0		-0.25549	-0.46759	-1.31978	-0.28666	0.08947	0.96273	-0.43373	0.78494	0.40164	0.95216	0.62603	2.67666	0.14372	-0.56505	-0.72668	-0.89538	-0.59223
52	113.21478880162	23.2482953976575	726596.78245683	2572735.70695326	1	0	-0.69506	0.59248	0.35126	2.21228	-0.52572	-1.12898	-0.99874	-0.50982	-0.52663	-0.30855	-0.07949	-0.40964	-0.49348	-0.35685	-0.4008	-0.74177	0.04077
53	113.271567182465	23.1391446645346	732596.78245683	2560735.70695326	34	3.52636	-1.06406	-0.75898	-1.13104	-1.04408	0.23937	1.03026	1.28127	3.18949	1.3299	0.47189	1.15518	2.67666	1.09952	-0.61639	-0.83455	-0.78092	-0.74696
54	113.158818600659	23.3020134748184	720779.899180549	2578599.07451394	0		-0.50654	1.54315	2.84903	3.44105	2.34154	-1.12898	-0.99874	-0.50982	-0.62608	-0.59371	-0.60864	-0.40964	-0.49348	0.77822	3.62707	4.17471	3.56804
55	113.507470952113	23.2258397049955	756596.782456831	2570735.70695326	0		0.87454	2.49844	0.55588	2.76931	3.83425	0.8542	1.33731	-0.50982	-0.62608	-0.59371	-0.60864	-0.40964	-0.49348	1.16994	0.27814	0.45326	1.26138
56	113.429676913109	23.2451171614675	748596.782456829	2572735.70695326	0		1.91395	1.49755	0.86938	1.60165	-0.55177	-1.12898	-0.99874	-0.50982	-0.62608	-0.59371	-0.60864	-0.40964	-0.49348	0.89096	2.42226	2.69564	0.9662
57	113.308141240142	22.9941610533812	736596.782456831	2544735.70695326	0		-0.19706	-0.04022	0.48128	0.04452	-0.96356	-1.11886	-0.77389	-0.23238	-0.39402	-0.48865	-0.60864	-0.40964	-0.33418	-0.87836	-0.42725	-0.54925	-1.00706
58	113.214639716912	23.2392690094647	726596.78245683	2571735.70695326	2	0.693147	-0.86212	-0.2231	0.51223	2.25626	-0.79245	-1.12898	-0.99874	-0.41734	-0.39402	-0.45863	-0.60864	-0.40964	-0.49348	-0.33974	-0.91788	0.07577	-0.36722
59	113.42492287021	23.0112034050567	748541.162897265	2546816.80899641	0		-0.64853	-0.73192	-0.52747	0.28913	-0.42901	-1.11886	-0.77389	-0.50982	-0.55978	-0.59371	-0.60864	-0.40964	-0.33418	0.57899	0.08387	0.36529	0.96046
60	113.417314118128	23.1008653775663	747596.78245683	2556735.70695326	2	0.693147	0.63336	0.22889	0.08661	-0.50939	-0.87564	0.96273	-0.43373	-0.41734	-0.09565	-0.29354	-0.25588	-0.40964	0.30302	-0.48709	-0.84739	-0.79375	-0.9989
61	113.485440765075	23.0907794131763	754596.782456831	2555735.70695326	0		-1.02319	-0.89	-0.53205	0.66096	-0.27033	0.8542	1.33731	-0.23238	-0.22826	-0.38359	-0.60864	-0.40964	-0.49348	-0.74486	-0.62544	-0.16389	-0.30449
62	113.456667611963	23.1183125716247	751596.78245683	2558735.70695326	4	1.38629	0.49876	0.22178	0.00853	-0.20393	-0.23498	0.8542	1.33731	-0.50982	-0.1288	-0.5787	-0.43226	-0.40964	-0.49348	0.38175	-0.33215	-0.40418	-0.18879
63	113.448386967941	23.1996891570015	750596.782456829	2567735.70695326	0		0.29709	0.59625	0.95914	-0.47067	0.6361	0.8542	1.33731	-0.50982	-0.62608	-0.59371	-0.60864	-0.40964	-0.49348	0.99078	0.00283	0.2528	0.73506
64	113.436989686071	23.1095903159964	749596.782456829	2557735.70695326	4	1.38629	-0.84136	-0.31887	-0.28271	-1.18131	-0.87248	0.8542	1.33731	0.32252	-0.02934	-0.02339	0.27327	-0.40964	-0.49348	-0.7572	-0.4721	-0.35244	-1.01045
65	113.473643268664	23.0645892805741	753436.905154043	2552814.02032705	0		3.50624	1.69899	1.41487	2.07016	0.97682	-1.11886	-0.77389	-0.50982	-0.59293	-0.59371	-0.60864	-0.40964	-0.49348	2.22868	0.70244	2.20273	1.8455
66	113.496030533897	23.1357490223508	755596.782456831	2560735.70695326	0		0.26563	0.4927	1.56155	0.15707	-0.08238	0.8542	1.33731	-0.50982	-0.62608	-0.59371	-0.60864	-0.40964	-0.49348	1.05071	1.11319	1.08787	-0.4691
67	113.400537877477	23.2545930363613	745596.78245683	2573735.70695326	0		2.77919	1.49274	1.15964	0.71996	1.56851	-1.12898	-0.99874	-0.50982	-0.62608	-0.59371	-0.60864	-0.40964	-0.49348	3.25201	2.72164	1.66255	1.35927
68	113.485110485623	23.0727318365218	754596.951873019	2553735.93759607	0		1.4995	0.672	0.79215	2.04907	1.67051	0.8542	1.33731	-0.50982	-0.62608	-0.59371	-0.60864	-0.40964	-0.49348	3.00206	-0.1188	1.50682	2.00556
69	113.341615123895	23.2374272359493	739596.78245683	2571735.70695326	0		-1.16139	-0.84285	-0.61469	-0.45276	-0.62381	-1.12898	-0.99874	0.78494	0.07011	0.83209	1.15518	-0.40964	0.14372	-0.3371	0.509	-0.78571	-0.10459
70	113.516221488766	23.1715367618869	757596.782456831	2564735.70695326	0		-0.09309	-0.2834	1.56119	-0.08783	0.75313	0.8542	1.33731	-0.41734	-0.55978	-0.5787	-0.60864	-0.40964	-0.49348	0.2684	-0.26197	0.1065	0.1458
71	113.27370465943	23.2655097352876	732596.78245683	2574735.70695326	9	2.19722	-1.02832	-0.77431	0.14677	0.62449	-0.88815	-1.12898	-0.99874	-0.32486	-0.42717	0.92214	1.15518	-0.40964	0.30302	-0.61618	-0.58937	-0.57997	-0.05329
72	113.535402876514	23.1531747055041	759596.782456829	2562735.70695326	3	1.09861	-1.06253	0.18782	3.00127	0.10282	-0.20282	0.8542	1.33731	-0.41734	-0.49347	-0.48865	-0.43226	-0.40964	-0.49348	0.27217	1.1743	0.01112	-0.38116
73	113.398442997316	23.1372645954308	745596.78245683	2560735.70695326	11	2.3979	1.30107	-0.42652	-0.35758	-0.00379	0.03828	0.96955	0.68404	-0.13989	-0.16195	-0.48865	-0.60864	-0.40964	-0.49348	-0.7064	-0.59484	-0.21251	-0.21787
74	113.339573324274	23.1200935235826	739596.782456831	2558735.70695326	15	2.70805	-1.27627	-1.04788	-0.65375	-0.77517	0.1023	0.96955	0.68404	1.61728	1.99294	0.56194	1.15518	0.47216	0.30302	-0.5234	-0.71946	-0.58466	-0.77551
75	113.244396268422	23.2659316699245	729596.782456829	2574735.70695326	4	1.38629	-0.98554	0.47711	-1.08741	0.12685	-0.54359	-1.12898	-0.99874	-0.50982	-0.39402	-0.12845	0.27327	-0.40964	-0.33418	-0.76305	1.00114	-0.73315	0.34293
76	113.406272691266	23.0288116436392	746596.78245683	2548735.70695326	0		-0.11679	-0.0447	-0.74047	-0.81612	-0.15282	-1.11886	-0.77389	-0.41734	-0.62608	-0.59371	-0.60864	-0.40964	-0.49348	0.16846	-0.56724	-0.23115	-0.84027
77	113.310607095439	23.2978865647351	736316.061299527	2578381.66696804	0		-0.36526	-0.64583	-0.62658	-0.52932	-0.62567	-1.12898	-0.99874	-0.50982	-0.62608	-0.59371	-0.60864	-0.40964	-0.49348	-0.22485	-0.30292	-0.17987	-0.48909
78	113.184592959551	23.3078711676576	723406.900246206	2579287.42526897	0		-0.1567	1.37942	1.70882	1.57412	0.21187	-1.12898	-0.99874	-0.50982	-0.62608	-0.59371	-0.60864	-0.40964	-0.49348	-0.07037	3.26134	0.40179	0.14574
79	113.241386541386	23.0854058173371	729596.782456829	2554735.70695326	8	2.07944	-0.85285	-1.08677	-0.87973	-0.45176	-0.73484	0.36414	-0.68004	0.9699	0.07011	0.29179	0.09689	0.03126	0.14372	-0.41031	-0.78669	-0.62755	-0.19323
80	113.288489945658	22.9854178740832	734596.782456831	2543735.70695326	1	0	0.15058	-0.40363	0.85707	0.03232	0.14112	-1.11886	-0.77389	-0.23238	-0.59293	-0.59371	-0.60864	-0.40964	-0.49348	0.47597	-0.55874	-0.12373	0.23136
81	113.205412097831	23.2042253496021	725711.247540794	2567839.89872681	0		-0.69942	-0.2899	-1.16512	0.07611	-0.05693	-1.12898	-0.99874	-0.50982	-0.59293	-0.59371	-0.60864	-0.40964	-0.49348	-0.63207	-0.48492	0.65463	0.25316
82	113.400698874189	23.2636175800395	745596.710517359	2574735.63472713	0		1.3465	0.50978	1.28315	0.07993	0.23254	-1.12898	-0.99874	-0.50982	-0.62608	-0.59371	-0.60864	-0.40964	-0.49348	1.20965	2.6649	0.60311	0.26942
83	113.214044125193	23.2031633440435	726596.78245683	2567735.70695326	0		0.36359	-0.91105	-0.9571	-0.65401	-0.80293	-1.12898	-0.99874	-0.50982	-0.29456	-0.36858	0.09689	-0.40964	-0.49348	-0.42812	-0.91084	-0.15021	-0.39704
84	113.377335357532	23.0473052319819	743596.78245683	2550735.70695326	1	0	-0.76939	-0.68452	-1.18575	-0.87134	-0.07134	-1.11886	-0.77389	-0.23238	-0.26141	1.26734	0.44965	0.47216	-0.33418	-0.96923	-0.27777	-0.84096	-0.38762
85	113.49753818357	23.2169706808773	755596.782456831	2569735.70695326	0		2.08259	2.37469	-0.35437	1.61899	4.40068	0.8542	1.33731	-0.41734	-0.59293	-0.56369	-0.60864	-0.40964	-0.49348	0.05002	-0.51028	1.71585	-0.38768
86	113.176594546502	23.3030012291614	722596.78245683	2578735.70695326	0		-0.21771	1.94074	1.89947	2.32509	1.57324	-1.12898	-0.99874	-0.50982	-0.62608	-0.59371	-0.60864	-0.40964	-0.49348	0.01956	3.56972	1.79619	1.42113
87	113.388683794349	23.1374128356733	744596.78245683	2560735.70695326	22	3.09104	0.11882	-0.33579	-0.18554	-0.79274	-0.83286	0.96955	0.68404	-0.04741	-0.09565	-0.09843	-0.43226	-0.40964	-0.49348	-0.54935	-0.67703	-0.69425	-0.60298
88	113.428371075637	23.1729167405206	748596.782456829	2564735.70695326	46	3.82864	0.45187	0.04049	-0.82616	-1.0078	-0.20877	0.96955	0.68404	-0.41734	-0.46032	-0.51866	-0.60864	-0.40964	-0.49348	-0.7383	-0.56899	-0.15808	-0.15632
89	113.436924576431	23.2676034017898	749296.793346602	2575239.01099728	0		0.94299	2.11248	0.19408	0.77868	1.8061	-1.12898	-0.99874	-0.50982	-0.62608	-0.59371	-0.60864	-0.40964	-0.49348	0.92246	3.53406	1.64786	1.6583
90	113.487105631858	23.1810268869839	754596.782456831	2565735.70695326	9	2.19722	-0.6359	-0.85535	0.38698	-0.22292	-0.12936	0.8542	1.33731	-0.13989	-0.02934	-0.48865	0.62603	-0.40964	-0.49348	-0.20955	-0.60514	-0.30341	-0.59889
91	113.408847853507	23.1732167573116	746596.78245683	2564735.70695326	109	4.69135	-0.13957	-0.57639	-0.69279	-0.64484	-0.69893	0.96955	0.68404	-0.32486	0.43479	-0.47364	-0.60864	0.03126	-0.33418	-0.45617	-0.40779	-0.13024	-0.82437
92	113.368847980726	23.1196564215056	742596.78245683	2558735.70695326	1	0	-0.24228	-0.33984	-0.70165	-0.8393	-0.4916	0.96955	0.68404	2.72707	2.68914	1.65755	1.50794	0.03126	2.85183	-0.73054	-0.72568	-0.94089	-0.90211
93	113.186072197391	23.2848121987694	723596.78245683	2576735.70695326	0		0.05313	1.52636	0.45875	1.89338	0.39335	-1.12898	-0.99874	-0.50982	-0.62608	-0.45863	-0.43226	0.03126	-0.49348	-0.45226	2.32671	2.6065	1.669
94	113.234476104748	23.2570448547261	728596.78245683	2573735.70695326	1	0	0.68576	0.82403	-0.42271	0.83375	-0.64791	-1.12898	-0.99874	-0.50982	-0.52663	-0.32356	-0.25588	-0.40964	-0.33418	-0.71527	0.49384	0.07073	-0.03546
95	113.300539348738	23.1206678876225	735596.782456831	2558735.70695326	1	0	-1.14247	-0.79248	-0.85374	-1.14699	0.13123	1.03026	1.28127	3.46693	1.06468	0.06666	-0.25588	6.64475	0.14372	-0.33083	-0.77486	-0.70802	-0.92648
96	113.556121966885	23.2160287231541	761596.78245683	2569735.70695326	3	1.09861	-0.11903	0.07307	-0.34568	-0.26291	-0.31096	0.8542	1.33731	-0.23238	-0.52663	-0.54868	-0.43226	-0.40964	-0.33418	-1.08051	1.58091	-0.34437	-0.49244
97	113.543970258197	23.0898467729623	760596.782456829	2555735.70695326	0		-0.97231	-0.83651	0.78048	-0.50315	-0.37907	0.8542	1.33731	-0.32486	-0.42717	-0.48865	-0.07949	-0.40964	-0.49348	-0.76903	-0.7328	-0.28902	-0.29946
98	113.274164645811	23.2925876762411	732596.78245683	2577735.70695326	0		-0.61678	-0.26854	0.57471	0.13325	-0.39051	-1.12898	-0.99874	-0.50982	-0.62608	-0.56369	-0.43226	-0.40964	-0.49348	-0.06468	0.43339	1.03988	-0.36155
99	113.380842064677	23.2458652610942	743596.78245683	2572735.70695326	1	0	1.67224	1.21147	-0.10403	1.3586	0.66103	-1.12898	-0.99874	-0.50982	-0.62608	-0.5787	-0.60864	-0.40964	-0.49348	1.51032	2.28628	1.54428	2.51036
100	113.298850652095	23.0213812759377	735596.782456831	2547735.70695326	14	2.63906	-0.25773	-0.55829	-0.65	-0.51525	-0.17404	-1.11886	-0.77389	-0.32486	-0.29456	-0.48865	-0.60864	-0.40964	-0.49348	0.04442	-0.33325	-0.24787	-0.42953
101	113.415863023997	23.0196376241766	747596.78245683	2547735.70695326	0		0.09086	-0.0599	-1.20126	-0.05277	0.14592	-1.11886	-0.77389	-0.50982	-0.62608	-0.54868	-0.07949	0.03126	-0.49348	-0.07543	-0.56813	1.35393	0.62326
102	113.464555568967	23.0369372055731	752557.045417619	2549735.21020804	1	0	0.44261	-0.02306	0.64748	0.06766	-0.1808	-1.11886	-0.77389	-0.50982	-0.55978	-0.59371	-0.60864	0.03126	-0.49348	-0.29041	1.74956	-0.01821	-0.18717
103	113.399408166953	23.1914164230641	745596.78245683	2566735.70695326	0		-0.49167	0.12754	-0.81045	-0.54072	-0.92377	0.96955	0.68404	-0.23238	0.03696	0.51692	0.62603	-0.40964	-0.33418	-0.66974	-0.88754	-0.82935	-0.77778
104	113.544991613034	23.1439929592005	760596.782456829	2561735.70695326	6	1.79176	1.28048	-0.37852	3.44818	-1.04314	-0.55996	0.8542	1.33731	-0.32486	-0.49347	-0.50366	-0.25588	0.03126	-0.33418	-0.77775	1.39366	1.23976	0.94781
105	113.505621083061	23.1265695295942	756596.782456831	2559735.70695326	0		0.46841	2.06089	1.4268	-0.23505	-0.18029	0.8542	1.33731	-0.50982	-0.62608	-0.59371	-0.60864	-0.40964	-0.49348	1.1834	1.07493	0.29905	0.10519
106	113.478009578627	23.2172798244888	753596.782456831	2569735.70695326	0		-0.3598	3.00727	0.20992	1.26858	2.2698	0.8542	1.33731	-0.50982	-0.59293	-0.56369	-0.60864	-0.40964	-0.49348	1.14135	-0.30328	3.00667	1.74935
107	113.222021851793	23.0947081866957	727596.78245683	2555735.70695326	0		-0.27546	-0.27443	-0.58244	-0.47279	-0.84034	0.36414	-0.68004	0.04507	-0.22826	-0.08342	-0.07949	-0.40964	-0.17488	-0.76792	-0.49165	-0.29871	-1.00368
108	113.264529693813	23.3017396200197	731595.129774317	2578733.96269545	5	1.60944	-1.05165	-0.52986	0.99652	-0.58536	0.27704	-1.12898	-0.99874	-0.23238	-0.42717	-0.33856	-0.60864	0.03126	-0.49348	-0.56146	0.34637	-0.50673	-0.27373
109	113.244547549039	23.2749578441133	729596.782456829	2575735.70695326	4	1.38629	0.06033	-0.07645	-1.20287	-0.64603	-0.45752	-1.12898	-0.99874	-0.50982	-0.59293	-0.50366	-0.60864	-0.40964	-0.49348	-1.09987	1.15096	-0.59307	-0.39227
110	113.282859104526	23.229264041777	733596.782456831	2570735.70695326	12	2.48491	-1.10366	-0.77287	-0.31756	-0.9536	-0.77302	-1.12898	-0.99874	0.59997	1.23044	3.18841	1.68433	0.03126	2.53322	-0.79753	-0.91769	-0.79617	-0.30026
111	113.497874142485	23.2350198119128	755596.782456831	2571735.70695326	0		3.39846	4.10397	1.00969	2.82394	5.47661	0.8542	1.33731	-0.50982	-0.62608	-0.59371	-0.60864	-0.40964	-0.49348	0.02828	0.46768	2.4533	2.26782
112	113.368056457573	23.0745285102513	742596.78245683	2553735.70695326	0		0.22347	-0.16851	-0.19933	-0.62793	-0.25671	0.96273	-0.43373	-0.50982	-0.02934	-0.47364	-0.07949	-0.40964	-0.17488	-0.27715	-0.42628	-0.52184	-0.43787
113	113.475685555288	23.0909327474882	753596.782456831	2555735.70695326	0		-0.57538	-0.60392	-0.6371	0.18415	0.28901	0.8542	1.33731	-0.32486	0.10327	0.27678	-0.43226	-0.40964	0.14372	-0.10174	-0.86503	-0.37766	-0.56341
114	113.370277744317	23.2008859464288	742596.78245683	2567735.70695326	1	0	-1.08954	-1.00373	-1.15667	-1.07168	-0.32131	0.96955	0.68404	0.13756	0.40164	3.30848	1.50794	0.03126	0.46232	-0.97398	-0.43497	-0.884	-0.91965
115	113.301310031905	23.1657977142483	735596.782456831	2563735.70695326	0		-0.95346	-0.34294	-0.09554	-0.19835	0.10053	-1.12898	-0.99874	-0.50982	-0.62608	-0.56369	-0.60864	-0.40964	0.94022	1.84233	-0.34864	0.7593	0.30554
116	113.263935272096	23.2656509872835	731596.782456829	2574735.70695326	7	1.94591	-0.16586	-0.37096	-0.19766	0.82073	-0.3132	-1.12898	-0.99874	-0.41734	-0.59293	-0.5787	-0.60864	-0.40964	-0.49348	0.10981	-0.08915	0.13853	0.04023
117	113.212460340141	23.1041276958578	726601.26441369	2556764.1200765	0		-1.22218	-0.88365	-0.32878	-0.49872	0.09444	0.36414	-0.68004	0.50749	0.13642	0.17172	0.80242	-0.40964	0.62162	-1.09306	-0.48575	-0.08482	-0.6091
118	113.301773371692	23.1928754745228	735596.782456831	2566735.70695326	0		-1.03991	-1.04253	-0.76198	0.08562	0.94804	-1.12898	-0.99874	-0.50982	-0.59293	-0.5787	-0.60864	-0.40964	-0.49348	1.26571	0.16274	-0.04997	0.73699
119	113.341772737782	23.2464528266257	739596.782456831	2572735.70695326	0		-0.53078	-0.46415	-0.0789	0.36907	-0.45283	-1.12898	-0.99874	-0.04741	-0.36086	-0.38359	-0.43226	-0.40964	-0.33418	0.61976	0.2972	-0.82842	-0.13216
120	113.166859974527	23.3030960799742	721600.757255681	2578731.27271206	0		-0.12979	2.24671	2.42854	2.86278	2.81884	-1.12898	-0.99874	-0.50982	-0.62608	-0.54868	-0.60864	-0.40964	-0.49348	-0.74932	3.60512	3.02335	2.50953
121	113.212560367883	23.1128983931996	726596.78245683	2557735.70695326	2	0.693147	-0.57836	-0.50068	-0.98441	-1.12992	-0.76354	0.36414	-0.68004	1.98721	1.36305	0.11169	0.27327	-0.40964	0.78092	-0.46557	-0.8492	-0.95819	-0.99738
122	113.545845097054	23.1891144644363	760596.782456829	2566735.70695326	0		1.7695	1.19478	0.21388	0.4644	0.2118	0.8542	1.33731	-0.50982	-0.62608	-0.59371	-0.60864	-0.40964	-0.49348	0.85714	1.63094	0.96792	0.8114
123	113.299003783823	23.0304073878807	735596.782456831	2548735.70695326	0		-0.35214	-0.27972	0.00254	-0.75968	-0.31337	-1.11886	-0.77389	2.07969	0.16957	0.06666	0.62603	0.47216	-0.49348	-0.58544	-0.72363	-0.85865	-0.56999
124	113.414406955294	23.003313392056	747477.295681338	2545925.03209166	0		1.30695	0.72888	-0.73047	0.18551	-0.64404	-1.11886	-0.77389	-0.50982	-0.62608	-0.51866	-0.60864	-0.40964	-0.49348	0.16376	0.44139	1.00335	-0.19746
125	113.272328843625	23.1842753011731	732596.78245683	2565735.70695326	10	2.30259	-1.17662	-1.12016	0.06479	-0.22251	-0.14392	-1.12898	-0.99874	-0.32486	0.26903	0.81708	1.86071	0.03126	1.25882	-0.59328	-0.90467	-0.4262	-0.49825
126	113.299156992712	23.0394334885676	735596.782456831	2549735.70695326	12	2.48491	-0.4091	-0.40891	0.69184	-0.81572	-0.33516	-1.11886	-0.77389	1.70976	0.83262	0.78707	0.09689	-0.40964	0.30302	-0.18162	-0.87914	-0.61084	-0.64413
127	113.358616641299	23.0927258214377	741596.78245683	2555735.70695326	2	0.693147	-0.86474	-0.34118	-1.16627	-1.09349	-0.62712	0.96273	-0.43373	-0.23238	-0.06249	0.72703	0.44965	-0.40964	0.78092	-0.72489	-0.6809	-0.73252	-0.35765
128	113.387565991333	23.0742347350223	744596.78245683	2553735.70695326	5	1.60944	-0.66764	-0.73519	-0.9439	-0.68961	0.21919	0.96273	-0.43373	-0.50982	-0.52663	-0.59371	-0.60864	-0.40964	-0.49348	-0.00453	-0.32825	-0.83313	0.71518
129	113.516897289466	23.2076346682031	757596.782456831	2568735.70695326	0		1.10025	0.08723	0.25155	1.92748	1.36902	0.8542	1.33731	-0.50982	-0.62608	-0.59371	-0.60864	-0.40964	-0.49348	0.24299	0.45771	1.07693	0.16243
130	113.427882736793	23.1458413941003	748596.782456829	2561735.70695326	4	1.38629	0.25878	0.0597	-0.6821	-0.14358	0.04487	0.96955	0.68404	-0.23238	-0.22826	-0.47364	-0.25588	0.03126	-0.01558	-0.60807	0.12143	-0.14723	-0.67064
131	113.555606885119	23.1889561643543	761596.78245683	2566735.70695326	0		-0.05176	0.59759	-0.15552	-0.36745	-0.9977	0.8542	1.33731	-0.50982	-0.55978	-0.42861	-0.43226	0.47216	-0.49348	-0.74031	2.1507	-0.40243	-0.19462
132	113.447893970606	23.1726143071267	750596.782456829	2564735.70695326	139	4.93447	-1.01763	-0.8888	-0.37783	-0.8217	-0.38763	0.8542	1.33731	-0.50982	-0.06249	-0.3986	-0.07949	-0.40964	-0.33418	-0.89067	-0.66561	-0.52717	-0.48793
133	113.20856317992	23.1833477368988	726068.976365388	2565532.4020424	0		-0.39566	0.41203	-0.05126	0.64825	0.29248	-1.12898	-0.99874	-0.50982	-0.62608	-0.59371	-0.60864	-0.40964	-0.49348	0.80516	-0.41222	0.78723	0.55372
134	113.565540848616	23.1978213887774	762596.78245683	2567735.70695326	21	3.04452	-0.49833	-0.66908	-0.81895	-0.2962	-0.45749	0.8542	1.33731	-0.41734	0.10327	-0.18848	-0.07949	0.47216	0.14372	-0.95785	2.8034	-0.42863	-0.60232
135	113.309680202399	23.0844213842697	736596.782456831	2554735.70695326	1	0	-0.55356	-0.83587	-0.75434	-0.6021	-0.51395	0.96273	-0.43373	0.69245	1.52881	2.30292	3.09538	0.03126	1.89602	-0.88802	-0.73158	-0.74594	-0.87666
136	113.32021177785	23.1294077748043	737596.782456831	2559735.70695326	63	4.14313	-0.18073	-0.83918	-0.64272	-1.17747	-0.22512	0.96955	0.68404	1.70976	3.45164	4.28403	3.97729	0.91306	4.44483	-0.81338	-0.99448	-0.87222	-0.97954
137	113.299310278785	23.0484595779947	735596.782456831	2550735.70695326	0		0.98075	-0.36402	1.26553	-0.6371	-0.10425	0.96273	-0.43373	0.50749	0.30218	1.35739	-0.07949	-0.40964	1.57742	-0.30348	-0.77143	-0.63149	-0.45404
138	113.25084239478	23.067214277625	730596.782456829	2552735.70695326	0		-0.34395	-0.60717	-0.28348	-0.16208	-0.00359	0.36414	-0.68004	0.32252	-0.29456	-0.0384	0.27327	-0.40964	0.14372	-0.22928	-0.77544	-0.43236	-0.35796
139	113.54123520207	23.0634631393832	760367.32712574	2552808.13209638	2	0.693147	2.66607	-0.30432	-0.60131	-0.42296	-0.6846	0.8542	1.33731	-0.50982	-0.52663	-0.59371	-0.60864	-0.40964	-0.49348	0.68163	-0.14755	0.32802	-0.1229
140	113.396521369632	23.0289597117144	745596.78245683	2548735.70695326	1	0	-0.06127	0.28262	-1.05938	-0.53058	0.41725	-1.11886	-0.77389	-0.50982	-0.59293	-0.59371	-0.60864	-0.40964	-0.49348	0.5765	-0.21576	0.25553	-0.11158
141	113.438623600362	23.1998408730303	749596.782456829	2567735.70695326	3	1.09861	0.55864	-0.07503	1.26215	0.14227	0.40941	0.8542	1.33731	-0.50982	-0.62608	-0.5787	-0.60864	-0.40964	-0.49348	1.1767	-0.3263	-0.36403	0.49373
142	113.515061205733	23.0460436630431	757717.602097992	2550832.08346341	0		2.48664	0.45387	-0.05651	-0.42669	-0.11805	0.8542	1.33731	-0.50982	-0.59293	-0.53367	-0.60864	-0.40964	-0.49348	0.33163	-0.4026	0.63927	0.83617
143	113.178991409521	23.2229020855084	722975.30753323	2569867.70442208	0		1.53987	2.24176	1.23473	2.85321	1.03016	-1.12898	-0.99874	-0.50982	-0.62608	-0.59371	-0.60864	-0.40964	-0.49348	1.17273	0.16514	1.24288	1.78098
144	113.33863544422	23.0659388564789	739596.78245683	2552735.70695326	0		-1.20586	0.14612	-0.44812	0.45104	-0.71309	0.96273	-0.43373	-0.50982	-0.46032	-0.56369	-0.60864	-0.40964	-0.49348	0.7735	-0.134	-0.04598	-0.26496
145	113.332005207665	23.2465982019843	738596.782456831	2572735.70695326	0		-0.65099	0.06614	0.25621	0.05397	0.52368	-1.12898	-0.99874	-0.50982	-0.62608	-0.56369	-0.60864	-0.40964	-0.49348	2.63281	-0.23718	0.54174	1.0736
146	113.243188749929	23.1937218698115	729596.782456829	2566735.70695326	5	1.60944	-0.49275	-0.28724	-0.40899	-0.15745	-0.07852	-1.12898	-0.99874	-0.50982	-0.16195	-0.27853	-0.07949	-0.40964	-0.49348	-0.61477	-0.93988	-0.47054	-0.34141
147	113.195547438709	23.2666227510922	724596.78245683	2574735.70695326	1	0	-0.41754	-0.60492	-0.39262	2.40293	0.92651	-1.12898	-0.99874	-0.50982	-0.62608	-0.5787	-0.60864	-0.40964	-0.49348	-0.15117	1.08794	0.74979	1.22362
148	113.20221283507	23.0769284591793	725596.78245683	2553735.70695326	8	2.07944	-0.68964	-0.87465	-0.19081	-0.20584	-0.37736	0.36414	-0.68004	-0.23238	-0.32771	-0.0534	0.09689	0.47216	-0.17488	-0.64399	-0.19288	-0.75098	-0.4546
149	113.322978643358	23.2907863618227	737594.449566637	2577615.45444078	1	0	0.10678	0.51703	0.22671	-0.51867	-0.08547	-1.12898	-0.99874	-0.50982	-0.62608	-0.59371	-0.60864	-0.40964	-0.49348	0.03236	-0.25439	-0.2253	-0.32071
150	113.56519641198	23.1797731194129	762596.78245683	2565735.70695326	0		-0.23317	-0.05481	0.52009	-0.50033	-0.81909	0.8542	1.33731	-0.50982	-0.62608	-0.56369	-0.43226	0.03126	-0.49348	0.17252	2.56117	-0.2517	0.54562
151	113.176447645953	23.2939746720039	722596.78245683	2577735.70695326	0		-0.31391	3.07938	1.44068	2.44639	1.61315	-1.12898	-0.99874	-0.50982	-0.62608	-0.59371	-0.60864	-0.40964	-0.49348	0.31672	3.09801	2.83168	2.4625
152	113.358459066612	23.0837001642764	741596.78245683	2554735.70695326	0		-1.11698	-0.67377	-1.15277	-0.78322	-0.67838	0.96273	-0.43373	-0.32486	0.20272	1.5675	0.27327	-0.40964	-0.01558	-1.01337	-0.7996	-0.93603	-0.64366
153	113.436826745752	23.1005651975068	749596.782456829	2556735.70695326	3	1.09861	-0.53762	-0.82646	-0.988	-0.37659	-0.5883	0.8542	1.33731	0.13756	0.13642	-0.24851	0.27327	0.03126	-0.49348	-0.78557	-0.83649	-0.49117	-0.74689
154	113.280259655028	23.0758207276225	733596.782456831	2553735.70695326	5	1.60944	-0.17158	-0.24509	-0.4488	-1.07478	-0.97853	0.96273	-0.43373	1.80225	1.23044	0.68201	0.62603	0.47216	0.78092	-0.75886	-0.71746	-0.72126	-0.9636
155	113.185777449023	23.2667591456719	723596.78245683	2574735.70695326	0		1.49633	0.51446	0.26495	2.91436	2.27574	-1.12898	-0.99874	-0.50982	-0.62608	-0.5787	-0.60864	-0.40964	-0.49348	2.24515	1.44734	2.0838	2.42532
156	113.290168111047	23.0847056600052	734596.782456831	2554735.70695326	5	1.60944	-0.74402	-0.15913	-0.899	-0.48936	-0.23321	0.96273	-0.43373	2.07969	1.13099	1.65755	2.38985	0.91306	0.94022	-0.40359	-0.71722	-0.79309	-0.65388
157	113.337700392306	23.0117837824686	739596.782456831	2546735.70695326	5	1.60944	0.01398	0.05445	1.48611	-0.93354	-0.55111	-1.11886	-0.77389	0.04507	0.89892	0.77206	2.21347	-0.40964	1.09952	-0.50948	-0.5512	-0.88764	-0.8374
158	113.31773656623	22.9849926021484	737596.782456831	2543735.70695326	0		-0.19494	-0.3633	0.01556	0.6136	-0.63203	-1.11886	-0.77389	-0.32486	0.50109	0.36683	0.44965	-0.40964	-0.33418	-0.54417	-0.94408	-0.51762	-0.58327
159	113.233724495888	23.2119134564	728596.78245683	2568735.70695326	2	0.693147	-0.39995	-0.93366	-0.19031	0.34164	-0.96486	-1.12898	-0.99874	-0.04741	0.96522	1.01219	1.33156	-0.40964	1.41812	-0.75936	-0.9797	-0.78452	-0.89111
160	113.331691370471	23.2285468834237	738596.782456831	2570735.70695326	0		0.19138	0.33377	-0.07481	-0.58325	0.4734	-1.12898	-0.99874	-0.23238	-0.49347	-0.56369	-0.25588	-0.40964	-0.49348	-0.28938	0.45637	-0.65348	-0.01492
161	113.397961502418	23.1101885279082	745596.78245683	2557735.70695326	0		-0.13781	-0.3749	-0.27037	-0.68514	-0.53811	0.96955	0.68404	0.50749	0.16957	0.44187	0.62603	0.47216	-0.17488	-0.49174	-0.87836	-0.72961	-0.68871
162	113.388843801836	23.1464382331587	744596.78245683	2561735.70695326	9	2.19722	1.24573	0.34459	-0.01746	-0.3634	-0.27909	0.96955	0.68404	-0.50982	-0.59293	-0.59371	-0.60864	-0.40964	-0.49348	0.69533	-0.12062	0.29003	0.37058
163	113.252650613331	23.1755298746201	730596.782456829	2564735.70695326	1	0	-0.93937	-0.85257	-0.85846	-0.9201	-0.45977	-1.12898	-0.99874	2.35714	2.98751	4.17897	2.56624	-0.40964	3.32973	-0.88492	-0.51673	-0.85815	-0.71586
164	113.342403983856	23.2825550755321	739596.782456831	2576735.70695326	0		-0.36679	0.81745	0.36023	0.289	-0.74213	-1.12898	-0.99874	-0.50982	-0.55978	-0.51866	0.09689	-0.40964	-0.49348	0.38375	-0.09931	0.01935	-0.18875
165	113.419910106081	23.2452679939703	747596.78245683	2572735.70695326	0		0.61949	1.51787	1.50184	2.35278	-0.25338	-1.12898	-0.99874	-0.50982	-0.62608	-0.5787	-0.60864	-0.40964	-0.49348	0.31114	2.32304	2.44071	0.13642
166	113.515378644321	23.126414120274	757596.782456831	2559735.70695326	0		0.35115	1.38822	1.94677	-0.84511	-0.39597	0.8542	1.33731	-0.41734	-0.46032	-0.59371	-0.60864	-0.40964	-0.49348	-0.47716	1.34592	0.32199	1.18997
167	113.400214698282	23.2365426325134	745596.78245683	2571735.70695326	0		-0.58508	1.43808	-0.00227	2.25764	1.15076	0.96955	0.68404	-0.50982	-0.62608	-0.59371	-0.60864	-0.40964	-0.49348	3.02238	1.60875	2.00951	1.15115
168	113.262110089655	23.1573374723524	731596.782456829	2562735.70695326	4	1.38629	-1.13181	-0.9444	-1.1812	-1.01289	-0.31289	1.03026	1.28127	1.33983	2.58968	1.52248	1.50794	3.55846	0.62162	-0.79801	-0.82318	-0.78434	-1.06766
169	113.299463642064	23.0574856561585	735596.782456831	2551735.70695326	4	1.38629	-0.28756	-0.52018	0.85585	-0.96967	-0.51076	0.96273	-0.43373	-0.50982	0.00381	-0.48865	-0.60864	0.47216	-0.49348	-0.63436	-0.67431	-0.76188	-0.67192
170	113.318353500682	23.0210966659896	737596.782456831	2547735.70695326	7	1.94591	-0.80377	-0.60144	0.52589	-0.3161	-0.5623	-1.11886	-0.77389	3.28197	1.76088	5.01944	2.919	0.03126	3.80763	-0.557	-0.78343	-0.89898	-0.45014
171	113.320678102114	23.1564852977263	737596.782456831	2562735.70695326	9	2.19722	-0.75794	-0.90434	-0.92172	-0.96148	-0.36531	0.96955	0.68404	0.32252	1.09783	0.33681	-0.07949	1.79486	0.62162	-0.51255	-0.88892	-0.66712	-0.6878
172	113.546016051073	23.1981387308969	760596.782456829	2567735.70695326	1	0	0.21255	1.0504	-0.19921	0.12395	-0.34764	0.8542	1.33731	-0.41734	-0.49347	-0.53367	-0.60864	-0.40964	-0.49348	-0.5113	1.88853	-0.17258	0.69023
173	113.311382027527	23.1837064445695	736596.782456831	2565735.70695326	0		-0.51501	-0.0326	-0.73362	0.28035	1.02768	-1.12898	-0.99874	-0.50982	-0.62608	-0.59371	-0.60864	-0.40964	-0.49348	-0.57461	-0.33681	-0.14502	0.32772
174	113.390609196364	23.245716853787	744596.78245683	2572735.70695326	0		1.45805	2.26063	0.2723	1.27882	1.77604	0.96955	0.68404	-0.50982	-0.62608	-0.59371	-0.60864	-0.40964	-0.49348	3.76559	2.17868	2.89408	2.67679
175	113.438296160757	23.1817908530381	749596.782456829	2565735.70695326	30	3.4012	1.04317	0.13675	0.17116	-0.87516	-0.81767	0.8542	1.33731	-0.50982	-0.06249	-0.45863	-0.25588	0.03126	-0.33418	-0.71342	-0.62658	-0.17042	-0.08142
176	113.434584163311	23.2676234869525	749057.232408415	2575237.21102825	0		1.24567	1.84623	0.35036	0.96678	1.58329	-1.12898	-0.99874	-0.50982	-0.62608	-0.59371	-0.60864	-0.40964	-0.49348	0.99003	3.62359	1.98152	1.95517
177	113.468796731767	23.2420217548637	752606.935687192	2572460.41325423	0		3.31803	4.4475	-0.36361	0.62024	2.84057	-1.12898	-0.99874	-0.50982	-0.62608	-0.59371	-0.60864	-0.40964	-0.49348	0.93915	1.17418	0.80636	1.90853
178	113.321768927988	23.219665788056	737596.782456831	2569735.70695326	0		-0.08291	0.55813	0.19136	0.23901	0.53335	-1.12898	-0.99874	-0.13989	-0.59293	-0.50366	-0.43226	-0.40964	-0.49348	0.77902	-0.20461	-0.52109	0.50653
179	113.437642267059	23.1456906758724	749596.782456829	2561735.70695326	9	2.19722	0.94707	0.2334	-1.01799	-0.6746	-0.756	0.96955	0.68404	-0.04741	-0.22826	0.36683	0.09689	-0.40964	-0.01558	-0.81528	0.15874	-0.60425	-0.47272
180	113.566058152034	23.224893706148	762596.78245683	2570735.70695326	2	0.693147	0.27376	-0.49578	0.32136	0.61249	-0.77016	0.8542	1.33731	-0.50982	-0.52663	-0.5787	-0.60864	-0.40964	-0.49348	-0.64577	1.63218	0.85295	-0.21219
181	113.386929012036	23.0381327134904	744596.78245683	2549735.70695326	0		-0.52227	-0.34567	-1.19185	-0.32394	-0.12653	-1.11886	-0.77389	-0.32486	-0.22826	0.96717	-0.07949	0.91306	-0.01558	-0.69449	-0.29337	-0.95104	0.45828
182	113.540751557637	23.2397310813416	759977.085767588	2572333.80553533	0		-0.26823	1.86062	1.81066	2.16244	3.37469	0.8542	1.33731	-0.50982	-0.62608	-0.59371	-0.60864	-0.40964	-0.49348	3.25092	-0.07672	2.40518	3.15095
183	113.221280258807	23.0495754764392	727596.78245683	2550735.70695326	1	0	-0.71893	-0.10555	0.32584	-0.28489	-0.10933	0.36414	-0.68004	-0.13989	-0.36086	0.53192	0.80242	-0.40964	0.14372	-0.83744	0.0355	-0.51013	-0.8832
184	113.505118344721	23.0994956042656	756596.782456831	2556735.70695326	0		-0.50238	-0.53732	0.50859	1.53535	0.71545	0.8542	1.33731	-0.50982	-0.49347	-0.50366	-0.60864	-0.40964	-0.33418	0.25117	-0.15811	0.55656	0.23287
185	113.48727257892	23.190051571301	754596.782456831	2566735.70695326	64	4.15888	-0.39654	-0.21518	-0.28299	-0.66559	0.52704	0.8542	1.33731	-0.23238	-0.09565	-0.15846	-0.60864	0.03126	0.14372	-0.67111	-0.5606	-0.43133	-0.58108
186	113.3321622443	23.2556238442144	738596.782456831	2573735.70695326	1	0	-0.2634	-0.63939	0.31462	-0.47162	-0.31785	-1.12898	-0.99874	-0.50982	-0.55978	-0.45863	-0.43226	-0.40964	-0.49348	1.11076	-0.25356	0.06245	0.74764
187	113.271871617407	23.1571969530434	732596.78245683	2562735.70695326	1	0	-0.83917	-0.59603	-1.19039	-1.05806	-0.9742	1.03026	1.28127	0.9699	1.99294	0.29179	0.27327	1.35396	1.09952	-0.93714	-0.89882	-0.86414	-1.02542
188	113.458645957042	23.2266113847699	751596.78245683	2570735.70695326	0		3.54632	2.82321	1.02897	1.8343	0.06143	0.8542	1.33731	-0.50982	-0.62608	-0.59371	-0.60864	-0.40964	-0.49348	0.92793	0.94307	1.07643	3.83242
189	113.525305172085	23.135282591801	758596.782456831	2560735.70695326	11	2.3979	-0.72697	0.56837	2.94299	-0.36641	-0.40675	0.8542	1.33731	-0.04741	-0.09565	0.20174	0.27327	-0.40964	-0.33418	-1.08833	1.54591	-0.68924	-0.63338
190	113.445766214642	23.0552887692942	750596.782456829	2551735.70695326	2	0.693147	-0.32848	-0.74831	-0.12887	0.57213	-0.62447	-1.11886	-0.77389	-0.50982	-0.62608	-0.54868	-0.25588	-0.40964	-0.49348	2.48856	0.52437	0.3989	-0.33827
191	113.398603657005	23.1462899285127	745596.78245683	2561735.70695326	3	1.09861	0.37903	-0.26405	-0.53067	0.00911	0.0506	0.96955	0.68404	-0.50982	-0.55978	-0.59371	-0.60864	-0.40964	-0.49348	0.24946	-0.60226	0.01153	-0.38317
192	113.329503308784	23.1021863827344	738596.782456831	2556735.70695326	26	3.2581	-0.3129	-0.62775	-1.03719	-0.72402	-0.32468	0.96273	-0.43373	0.415	0.46794	-0.11344	0.44965	3.11756	0.30302	-0.97082	-0.77822	-0.95288	-1.06558
193	113.204871845576	23.2394064399571	725596.78245683	2571735.70695326	2	0.693147	-0.79073	0.87438	0.67697	2.59706	-0.94972	-1.12898	-0.99874	-0.41734	-0.49347	-0.54868	-0.60864	-0.40964	-0.49348	0.68568	-0.39127	-0.78934	-0.37509
194	113.225307085846	23.2932887738015	727596.78245683	2577735.70695326	0		-0.45519	0.17732	-0.14763	-0.45342	-0.6077	-1.12898	-0.99874	-0.41734	-0.55978	-0.2335	-0.25588	-0.40964	-0.49348	0.0336	2.40489	0.38862	-0.333
195	113.514370022921	23.0722665715051	757596.782456831	2553735.70695326	4	1.38629	-0.847	-0.78503	-0.12536	0.2389	-0.33076	0.8542	1.33731	-0.50982	-0.55978	-0.50366	-0.60864	0.03126	-0.49348	-0.40357	-0.3852	-0.3927	-0.00326
196	113.545674228808	23.1800901864419	760596.782456829	2565735.70695326	13	2.56495	1.94623	1.06002	0.7855	0.2421	0.12961	0.8542	1.33731	-0.50982	-0.62608	-0.59371	-0.60864	-0.40964	-0.49348	1.22243	1.46228	1.30882	-0.00843
197	113.233274434633	23.1848344820945	728596.78245683	2565735.70695326	2	0.693147	-0.53276	-0.48752	-0.53415	-0.98517	-0.86848	-1.12898	-0.99874	-0.23238	0.46794	0.90713	1.50794	-0.40964	0.30302	-0.71544	-0.70576	-0.87129	-0.80784
198	113.550414142721	23.1580489982782	761125.013875009	2563302.52386619	0		-0.03163	1.206	2.28486	0.32296	-0.22169	0.8542	1.33731	-0.50982	-0.62608	-0.59371	-0.60864	-0.40964	-0.49348	1.36738	1.82914	1.95304	1.33284
199	113.467747732265	23.190359104079	752596.782456831	2566735.70695326	0		1.06106	0.21994	0.08568	-0.11528	0.77574	0.8542	1.33731	-0.50982	-0.62608	-0.59371	-0.60864	-0.40964	-0.49348	1.47182	-0.56796	0.74091	0.8158
200	113.319126419209	23.0662264922236	737596.782456831	2552735.70695326	2	0.693147	-0.56821	-0.64323	-0.72499	-0.87533	-0.66661	0.96273	-0.43373	-0.04741	0.40164	1.26734	2.03709	-0.40964	0.30302	-0.4077	-0.38419	-0.8249	-0.53783
201	113.205650465947	23.1196959505961	725877.484588313	2558477.87447276	0		-0.76536	-0.50386	-1.01565	-0.92062	0.54827	0.36414	-0.68004	-0.32486	-0.59293	-0.51866	-0.60864	-0.40964	-0.49348	-0.06647	-0.69799	-0.6074	-0.29233
202	113.282705580745	23.2202380548615	733596.782456831	2569735.70695326	9	2.19722	-0.19961	-0.15685	-0.44808	-0.4212	-0.63412	-1.12898	-0.99874	0.23004	0.36848	0.68201	0.09689	0.03126	0.14372	-0.30211	-0.83075	-0.69326	-0.79017
203	113.517405030719	23.2347079770478	757596.782456831	2571735.70695326	0		1.99219	3.03212	1.52665	3.23157	3.60778	0.8542	1.33731	-0.50982	-0.62608	-0.59371	-0.60864	-0.40964	-0.49348	1.97905	-0.03419	1.24027	2.45223
204	113.26271726311	23.1934421580437	731596.782456829	2566735.70695326	3	1.09861	-1.08602	-0.76676	-0.78467	-1.02719	-0.46202	-1.12898	-0.99874	2.26466	2.58968	5.8449	5.91749	0.03126	5.71923	-0.76448	-0.9824	-0.91218	-1.07363
205	113.398764397429	23.155315250209	745596.78245683	2562735.70695326	0		-0.97753	-0.78026	-0.98255	-0.40516	-0.84604	0.96955	0.68404	-0.13989	-0.32771	0.08167	0.44965	-0.40964	-0.49348	-0.41826	-0.56256	-0.7536	-0.30075
206	113.156903352836	23.2942447749397	720596.782456831	2577735.70695326	0		0.28319	2.00903	2.6735	4.04378	3.20335	-1.12898	-0.99874	-0.50982	-0.62608	-0.59371	-0.60864	-0.40964	-0.49348	0.63274	3.78558	4.96017	4.34331
207	113.389645045864	23.1915650498527	744596.78245683	2566735.70695326	1	0	-0.77	-0.84212	-1.08324	-0.782	-1.00754	0.96955	0.68404	-0.32486	-0.02934	0.92214	1.15518	0.03126	0.46232	-0.76108	-0.72975	-0.9122	-0.81306
208	113.477510197332	23.1902056399756	753596.782456831	2566735.70695326	5	1.60944	-0.20984	-0.35386	0.14981	-0.94965	0.30616	0.8542	1.33731	0.13756	-0.36086	-0.2185	0.27327	-0.40964	0.94022	-0.16769	-0.84703	-0.51903	-0.5041
209	113.568998853303	23.0880512842817	763165.329651623	2555581.71987682	0		0.90091	0.80355	1.95561	0.09403	0.02938	0.8542	1.33731	-0.50982	-0.62608	-0.59371	-0.60864	-0.40964	-0.49348	0.73306	0.28134	0.02671	1.49096
210	113.435688455985	23.0373890490646	749596.782456829	2549735.70695326	0		0.42384	0.02047	-1.03987	-0.04023	0.06608	-1.11886	-0.77389	-0.04741	-0.52663	-0.53367	-0.60864	0.03126	-0.49348	-0.83562	0.18256	-0.52526	-0.86021
211	113.545005552531	23.1619204906443	760563.502530476	2563721.70519376	12	2.48491	-1.1709	1.35846	2.10028	0.09142	0.11578	0.8542	1.33731	-0.50982	-0.62608	-0.59371	-0.60864	-0.40964	-0.49348	1.56614	1.46512	1.27651	0.71664
212	113.370596347796	23.2189368268518	742596.78245683	2569735.70695326	10	2.30259	-1.00633	1.04191	-0.74367	0.30924	-0.44703	0.96955	0.68404	-0.50982	-0.52663	-0.50366	-0.07949	-0.40964	-0.33418	-0.59102	0.65431	-0.31891	0.06407
213	113.232376343426	23.1306762294913	728596.78245683	2559735.70695326	8	2.07944	-1.22191	-0.87504	-0.77009	-1.01847	-0.56731	0.36414	-0.68004	1.15487	1.52881	1.05722	0.9788	1.35396	0.30302	-0.54172	-0.79741	-0.59466	-0.77201
214	113.439279466065	23.2359407756852	749596.782456829	2571735.70695326	0		0.53765	1.06442	0.83067	1.53045	0.89551	0.8542	1.33731	-0.50982	-0.62608	-0.59371	-0.60864	-0.40964	-0.49348	0.38363	1.86937	1.38855	1.91674
215	113.349646181917	23.1379997646014	740596.78245683	2560735.70695326	21	3.04452	-0.98318	-0.87403	-1.35665	-1.19836	-0.30641	0.96955	0.68404	0.32252	1.62827	-0.11344	-0.43226	1.35396	-0.49348	-0.5735	-0.79087	-0.70805	-0.7373
216	113.428208214265	23.1638916364643	748596.782456829	2563735.70695326	18	2.89037	-0.43455	-0.58514	-0.79925	-0.48095	-0.658	0.8542	1.33731	-0.50982	0.20272	-0.08342	-0.25588	-0.40964	-0.49348	-0.59894	-0.92561	-0.7805	-0.97914
217	113.213449727783	23.1670574985548	726596.78245683	2563735.70695326	1	0	-0.65267	-0.54513	-0.61562	-0.28469	0.21979	-1.12898	-0.99874	0.32252	-0.26141	-0.47364	-0.07949	0.03126	-0.49348	-0.84917	-0.56311	-0.65309	-0.54136
218	113.506757063004	23.2413687429192	756493.98669693	2572454.69733238	0		4.03796	4.24332	1.25337	3.21522	5.37987	0.8542	1.33731	-0.50982	-0.62608	-0.59371	-0.60864	-0.40964	-0.49348	0.99462	0.14933	2.52598	3.35304
219	113.235078749551	23.2931497701624	728596.78245683	2577735.70695326	0		-0.14867	-0.26131	-0.19347	0.06164	-0.09393	-1.12898	-0.99874	-0.32486	-0.59293	-0.56369	-0.60864	-0.40964	-0.49348	-0.34613	1.98703	0.12646	-0.37944
220	113.312998884274	23.2917279417932	736571.668624216	2577703.40648112	6	1.79176	-0.19549	-0.2052	-0.49792	-0.51077	-0.37842	-1.12898	-0.99874	-0.50982	-0.36086	-0.41361	-0.43226	-0.40964	-0.49348	0.04745	-0.36531	-0.43162	-0.72369
221	113.274011240205	23.2835617072561	732596.78245683	2576735.70695326	0		-0.43673	0.37504	0.33834	0.94588	0.45559	-1.12898	-0.99874	-0.50982	-0.62608	-0.56369	-0.60864	-0.40964	-0.49348	0.31897	0.39337	0.80553	0.2151
222	113.263173443881	23.2205205537819	731596.782456829	2569735.70695326	6	1.79176	-0.52349	-0.67811	-0.91008	-0.45113	-0.77413	-1.12898	-0.99874	0.04507	0.33533	1.22231	1.68433	0.47216	0.14372	-1.07784	-0.60612	-0.69084	-0.80664
223	113.254317746081	23.2748177457738	730596.782456829	2575735.70695326	0		0.14493	-0.62666	-0.73195	-0.00642	-0.32065	-1.12898	-0.99874	-0.50982	-0.62608	-0.59371	-0.60864	-0.40964	-0.49348	0.30766	0.64994	0.60229	0.76228
224	113.231034275813	23.04943809207	728596.78245683	2550735.70695326	0		0.83089	0.12203	0.58414	-0.19296	-0.41499	0.36414	-0.68004	-0.50982	-0.52663	-0.45863	-0.07949	-0.40964	-0.49348	-0.53522	-0.14414	-0.18403	-0.19278
225	113.575137220919	23.170874420371	763632.337672741	2564767.8986994	0		-1.03015	0.00547	1.38811	0.52697	0.7267	0.8542	1.33731	-0.50982	-0.59293	-0.59371	-0.60864	-0.40964	-0.49348	2.04496	1.85542	0.85633	0.6524
226	113.280869293878	23.1119253302171	733596.782456831	2557735.70695326	60	4.09434	-0.84916	-0.86614	-1.11653	-0.94281	-0.22561	1.03026	1.28127	2.44962	1.76088	0.8471	0.62603	2.67666	1.89602	-0.70863	-0.66816	-0.60083	-0.78734
227	113.349961057903	23.1560510582169	740596.78245683	2562735.70695326	34	3.52636	-1.19361	-0.61455	-1.34935	-1.08609	-0.02835	0.96955	0.68404	0.13756	0.43479	-0.18848	0.27327	4.44026	-0.01558	-0.13415	-0.85207	-0.39377	-0.54395
228	113.553449033305	23.1259269109115	761498.252827014	2559749.54488886	12	2.48491	-0.36789	0.25755	2.94864	-0.9832	-0.80517	0.8542	1.33731	-0.50982	-0.52663	-0.54868	-0.60864	-0.40964	-0.49348	-0.29691	0.21791	-0.29356	-0.02193
229	113.553333515675	23.1165439989241	761504.618617041	2558709.91749717	14	2.63906	-1.07829	0.17325	2.90363	-0.12058	-0.69815	0.8542	1.33731	0.04507	-0.02934	0.51692	0.62603	0.03126	-0.01558	-0.73316	-0.10395	-0.66664	-0.9117
230	113.232825050681	23.1577554064258	728596.78245683	2562735.70695326	2	0.693147	-0.99137	-0.83976	-0.41565	-0.60617	-0.77285	-1.12898	-0.99874	2.17218	1.99294	1.76261	2.38985	0.47216	1.57742	-0.71271	-0.91054	-0.90026	-0.96748
231	113.312937317893	23.2739644011724	736596.782456831	2575735.70695326	4	1.38629	1.06066	-0.2485	-0.09948	-0.28824	-0.07491	-1.12898	-0.99874	-0.41734	-0.42717	-0.2335	-0.60864	-0.40964	-0.49348	-0.06187	-0.453	-0.00721	0.02571
232	113.521047365723	23.0370205339524	758348.503430984	2549843.10977807	0		4.64388	0.99906	0.43653	-0.01715	0.7539	0.8542	1.33731	-0.50982	-0.62608	-0.59371	-0.60864	-0.40964	-0.49348	1.73846	-0.11687	1.13588	1.64112
233	113.396681062373	23.0379851811354	745596.78245683	2549735.70695326	0		-0.21743	-0.13578	-1.23611	-0.84352	-0.85981	-1.11886	-0.77389	-0.23238	-0.06249	-0.5787	-0.43226	-0.40964	-0.49348	-0.23138	-0.74083	0.00729	-0.5564
234	113.488610905078	23.2512239238957	754617.713241994	2573514.43672059	0		4.25015	5.32633	-0.18646	1.44456	5.71577	-1.12898	-0.99874	-0.50982	-0.62608	-0.59371	-0.60864	-0.40964	-0.49348	2.44734	1.0855	1.78809	2.81146
235	113.195843501968	23.284675686165	724596.78245683	2576735.70695326	0		-0.18013	0.87128	-0.10309	1.17341	-0.24231	-1.12898	-0.99874	-0.50982	-0.62608	-0.59371	-0.60864	-0.40964	-0.49348	-0.6281	2.0697	1.47051	0.34847
236	113.329347606865	23.0931605477448	738596.782456831	2555735.70695326	27	3.29584	-1.06935	0.28768	-0.91378	-1.0204	-0.55272	0.96273	-0.43373	3.83687	2.72229	1.7326	1.50794	0.03126	1.73672	-0.65874	-0.75448	-0.7604	-0.86866
237	113.303322883559	23.2831339389694	735596.782456831	2576735.70695326	0		-0.32019	-0.74334	-0.50945	0.07883	-0.84363	-1.12898	-0.99874	0.9699	-0.1951	1.31236	1.50794	-0.40964	0.30302	-0.91332	-0.72564	-0.86891	-0.98881
238	113.4966997595	23.1718476520869	755596.782456831	2564735.70695326	1	0	-0.05051	-1.01001	1.05101	-0.80638	0.03547	0.8542	1.33731	-0.13989	0.23588	0.60697	0.09689	0.47216	1.41812	-0.75012	-0.8459	-0.66324	-0.84508
239	113.253710451633	23.2387132235035	730596.782456829	2571735.70695326	0		-0.157	0.13241	-0.97144	-0.61978	-0.74477	-1.12898	-0.99874	-0.41734	-0.55978	-0.54868	-0.43226	-0.40964	-0.49348	-1.11716	-0.28261	-0.27863	-0.8891
240	113.291087397603	23.1388620596834	734596.782456831	2560735.70695326	28	3.3322	-1.15625	-0.66313	-0.96505	-0.7879	-0.35514	1.03026	1.28127	3.00452	4.04838	1.3874	1.86071	1.79486	1.41812	-0.53255	-0.76461	-0.72641	-0.83446
241	113.280564321118	23.0938730514512	733596.782456831	2555735.70695326	18	2.89037	-1.0005	-0.78052	-1.34209	-1.11428	-0.18344	0.96273	-0.43373	1.89473	3.05381	0.81708	1.33156	1.35396	0.78092	-0.72362	-0.99005	-0.72658	-0.89916
242	113.317582526921	22.9759665580445	737596.782456831	2542735.70695326	3	1.09861	-1.11311	-0.93419	-0.21714	0.53001	0.02825	-1.11886	-0.77389	0.69245	0.99838	2.76818	2.21347	1.79486	3.96693	-0.57569	-0.45601	-0.97126	-0.93055
243	113.357515282122	23.0295459835776	741596.78245683	2548735.70695326	1	0	0.32664	-0.33792	-0.30165	0.4578	0.24432	-1.11886	-0.77389	-0.23238	-0.29456	-0.59371	-0.60864	-0.40964	-0.49348	0.57105	-0.10911	-0.27661	-0.17831
244	113.234175235054	23.2389923292447	728596.78245683	2571735.70695326	0		-0.6342	-0.31905	0.19628	0.633	-0.68704	-1.12898	-0.99874	-0.50982	-0.52663	-0.51866	-0.43226	-0.40964	-0.49348	-0.50682	-0.09586	-0.16433	-0.29015
245	113.308909752391	23.0392913596722	736596.782456831	2549735.70695326	1	0	-0.95124	-0.29087	0.93097	-0.67779	0.07697	-1.11886	-0.77389	0.415	0.6337	0.50191	1.33156	0.47216	0.46232	-0.96221	-0.44575	-0.74613	-1.07069
246	113.299617082573	23.0665117230552	735596.782456831	2552735.70695326	14	2.63906	-0.36056	-0.29571	0.42721	-0.1399	-0.61946	0.96273	-0.43373	1.61728	2.39077	2.19786	1.50794	-0.40964	1.89602	-0.63872	-0.95219	-0.91725	-1.0223
247	113.378287890271	23.1014585126084	743596.78245683	2556735.70695326	33	3.49651	-0.97768	-0.91324	-0.64574	-0.93922	0.49423	0.96273	-0.43373	-0.13989	0.43479	-0.2335	0.27327	-0.40964	0.46232	-0.64682	-0.68924	-0.85538	-1.02587
248	113.328880970831	23.0660829749556	738596.782456831	2552735.70695326	1	0	-0.88308	-0.60722	-0.99668	-0.13456	-0.24166	0.96273	-0.43373	-0.50982	-0.52663	-0.59371	-0.60864	-0.40964	-0.49348	0.16248	-0.225	0.05943	0.53507
249	113.524300636569	23.2398853366515	758292.724668169	2572321.50279061	0		1.20326	3.51841	2.14911	3.10577	3.78406	0.8542	1.33731	-0.50982	-0.62608	-0.59371	-0.60864	-0.40964	-0.49348	1.60778	-0.47581	2.02289	2.99525
250	113.318507928714	23.0301226537879	737596.782456831	2548735.70695326	1	0	-0.1068	0.04038	0.85842	-0.55893	-0.69294	-1.11886	-0.77389	1.06238	0.86577	0.14171	0.44965	0.03126	1.73672	-0.83828	-0.56888	-0.66796	-0.84795
251	113.535063215321	23.1351259091337	759596.782456829	2560735.70695326	19	2.94444	1.26745	-0.27926	3.50699	-0.68724	-0.85643	0.8542	1.33731	-0.23238	-0.06249	-0.2185	-0.25588	-0.40964	0.14372	-0.2781	1.38289	-0.62578	-0.62345
252	113.298238896337	22.9852767156781	735596.782456831	2543735.70695326	2	0.693147	0.11087	0.08355	0.86714	0.0537	0.10621	-1.11886	-0.77389	-0.50982	-0.62608	-0.59371	-0.60864	-0.40964	-0.49348	0.15411	-0.77233	0.26256	0.10055
253	113.329191983249	23.0841347014494	738596.782456831	2554735.70695326	11	2.3979	-0.57944	0.0728	-1.05699	-0.53563	-0.69201	0.96273	-0.43373	2.17218	2.19186	1.86767	2.03709	-0.40964	2.53322	-1.0936	-0.52962	-0.68086	-0.85373
254	113.263477946014	23.2385727611099	731596.782456829	2571735.70695326	1	0	0.14888	-0.01389	-0.66376	-0.50553	-0.22079	-1.12898	-0.99874	-0.32486	-0.26141	-0.26352	-0.25588	-0.40964	-0.49348	-0.4394	-0.32268	-0.60068	-0.58851
255	113.506088369416	23.0556569415079	756779.498393147	2551881.19955673	0		1.04817	0.25986	0.07601	0.15584	0.40575	0.8542	1.33731	-0.50982	-0.62608	-0.59371	-0.60864	-0.40964	-0.49348	0.4991	0.02104	0.55264	0.41335
256	113.273551484216	23.2564837323113	732596.78245683	2573735.70695326	1	0	-0.87168	-0.87458	-0.27941	0.16201	-0.83646	-1.12898	-0.99874	-0.13989	0.46794	1.28234	1.15518	0.47216	1.41812	-0.84812	-0.61157	-0.93807	-1.05384
257	113.536253523441	23.1982964949403	759596.782456829	2567735.70695326	0		-0.51805	0.19233	0.47427	0.87026	0.09398	0.8542	1.33731	-0.50982	-0.59293	-0.59371	-0.60864	-0.40964	-0.49348	0.5551	1.43583	-0.00116	1.22081
258	113.338479405972	23.0569130390465	739596.782456831	2551735.70695326	2	0.693147	-0.91755	-0.66455	-0.0141	0.74851	-0.37011	0.96273	-0.43373	-0.41734	-0.49347	-0.47364	-0.60864	-0.40964	-0.49348	0.47385	0.0338	-0.29244	0.29945
259	113.488276022087	23.2441994359713	754596.782456831	2572735.70695326	0		4.18365	5.71415	0.0185	1.67694	4.96413	0.8542	1.33731	-0.50982	-0.62608	-0.59371	-0.60864	-0.40964	-0.49348	0.93013	0.96474	2.1395	3.28189
260	113.456503287524	23.109287596176	751596.78245683	2557735.70695326	3	1.09861	-0.22261	-0.67603	-0.61149	-1.01509	0.36941	0.8542	1.33731	1.33983	1.3962	0.23176	0.80242	3.55846	-0.01558	-0.5777	-0.87165	-0.52801	-0.94165
261	113.367266923493	23.0294003157173	742596.78245683	2548735.70695326	2	0.693147	0.56166	-0.11424	-0.6952	-0.18563	-0.96451	-1.11886	-0.77389	-0.50982	-0.62608	-0.44362	0.09689	0.03126	-0.33418	-0.3456	-0.28185	0.32366	0.72203
262	113.273967195722	23.300607744893	732562.629280104	2578623.72638021	2	0.693147	-0.3823	-0.32824	0.65223	-0.55715	-0.00567	-1.12898	-0.99874	-0.50982	-0.62608	-0.56369	-0.60864	0.03126	-0.49348	0.70257	0.13863	0.82509	0.42243
263	113.36837282798	23.0925797087724	742596.78245683	2555735.70695326	1	0	-0.30625	-0.76691	-1.01738	-0.733	-0.24276	0.96273	-0.43373	-0.23238	0.99838	0.09668	0.27327	1.35396	0.78092	0.1355	-0.72404	-0.50858	-0.62075
264	113.44609265697	23.0733389775402	750596.782456829	2553735.70695326	0		0.14616	0.04798	0.02067	0.7447	1.68506	0.8542	1.33731	-0.50982	-0.62608	-0.59371	-0.60864	-0.40964	-0.49348	2.8817	-0.54046	0.63207	1.05106
265	113.476016558575	23.1089824673314	753596.782456831	2557735.70695326	5	1.60944	-0.95077	-0.61324	-0.99059	-0.59034	-0.81101	0.8542	1.33731	-0.13989	-0.42717	-0.32356	-0.60864	0.03126	-0.49348	-0.63355	-0.57062	-0.6819	-0.23867
266	113.337544824925	23.0027578972956	739596.782456831	2545735.70695326	24	3.17805	-0.19233	-0.56681	0.79466	-0.3713	0.07976	-1.11886	-0.77389	-0.50982	-0.26141	-0.59371	-0.60864	-0.40964	-0.49348	0.05667	-0.73827	-0.37005	-0.45548
267	113.223063220208	23.1578935097692	727596.78245683	2562735.70695326	0		-0.80847	-0.45929	-1.11069	0.02505	-0.57598	-1.12898	-0.99874	0.415	0.5674	0.81708	0.44965	0.03126	0.14372	-0.96956	-0.88627	-0.89919	-1.05127
268	113.533877086506	23.0719547597083	759596.782456829	2553735.70695326	5	1.60944	0.84477	-0.27307	-0.80257	-0.95638	-0.76011	0.8542	1.33731	-0.41734	-0.42717	-0.5787	-0.60864	0.03126	-0.49348	0.02799	-0.59748	0.11625	-0.4539
269	113.366951666141	23.0113489586887	742596.78245683	2546735.70695326	0		-0.59534	-0.21159	0.66757	-0.97457	-0.91653	-1.11886	-0.77389	0.23004	0.20272	0.05165	-0.43226	0.47216	-0.17488	-0.05169	-0.80623	-0.81796	-0.86107
270	113.495696425095	23.1176996386639	755596.782456831	2558735.70695326	1	0	0.9948	0.8703	0.42693	0.93554	0.27372	0.8542	1.33731	-0.50982	-0.55978	-0.59371	-0.60864	-0.40964	-0.49348	1.5128	0.31226	1.27791	1.22155
271	113.339260383041	23.1020420131421	739596.782456831	2556735.70695326	8	2.07944	-0.29028	-0.47335	-0.96731	-1.07312	-0.2651	0.96273	-0.43373	0.32252	1.29675	-0.2185	0.09689	0.91306	-0.33418	-0.80092	-0.84053	-0.54152	-0.73461
272	113.33231935966	23.2646494750728	738596.782456831	2574735.70695326	3	1.09861	-0.51164	-0.79156	0.38482	-1.16061	-0.93692	-1.12898	-0.99874	-0.32486	-0.06249	0.86211	1.68433	-0.40964	0.30302	-0.4726	-0.1524	-0.8145	-0.23742
273	113.376543775475	23.0021771865626	743596.78245683	2545735.70695326	11	2.3979	0.82438	-0.64158	-0.21167	-0.76327	-0.03876	-1.11886	-0.77389	-0.32486	-0.09565	-0.45863	-0.43226	1.35396	-0.33418	-0.1584	-0.05154	-0.80317	-0.68436
274	113.439519632626	23.2627605290078	749571.40555589	2574707.01891399	0		-0.22818	2.58633	-0.10662	0.44249	1.29308	-1.12898	-0.99874	-0.50982	-0.62608	-0.5787	-0.60864	-0.40964	-0.49348	-0.23399	3.21188	1.11087	1.11222
275	113.330751745819	23.174392655201	738596.782456831	2564735.70695326	11	2.3979	-0.31973	0.02054	-0.83144	-0.2256	-0.70732	0.96955	0.68404	1.06238	0.89892	0.60697	-0.25588	-0.40964	0.62162	-0.9103	-0.88227	-0.66155	-0.83908
276	113.548771477983	23.0758465981378	761115.89805244	2554193.38741483	0		1.24316	0.19562	0.20368	-0.08457	-0.03132	0.8542	1.33731	-0.50982	-0.62608	-0.59371	-0.60864	-0.40964	-0.49348	0.66503	0.17275	1.91991	0.11404
277	113.465436330495	23.0640106153041	752596.782456831	2552735.70695326	0		1.98596	0.81204	1.33148	1.69123	1.86809	-1.11886	-0.77389	-0.50982	-0.62608	-0.59371	-0.60864	-0.40964	-0.49348	0.7141	0.58176	1.83127	1.08164
278	113.446419428003	23.0913891401936	750596.782456829	2555735.70695326	0		0.27396	-0.31457	-0.60083	-0.83362	0.22001	0.8542	1.33731	-0.32486	0.10327	-0.48865	-0.60864	0.03126	-0.49348	-0.00228	-0.57984	-0.33023	-0.52952
279	113.232226924615	23.1216498146932	728596.78245683	2558735.70695326	2	0.693147	-1.14861	-1.03442	-0.98536	-0.95197	0.04703	0.36414	-0.68004	0.9699	1.46251	0.54693	0.27327	4.44026	1.57742	-0.56024	-0.83	-0.85783	-0.59707
280	113.289556793082	23.0486011681039	734596.782456831	2550735.70695326	3	1.09861	1.67841	0.00621	1.38244	-0.3538	-0.70014	0.96273	-0.43373	-0.23238	-0.39402	-0.02339	0.44965	0.03126	-0.33418	-0.51941	-0.44304	-0.45025	-0.51107
281	113.332476553767	23.2736750945558	738596.782456831	2575735.70695326	16	2.77259	0.26829	-0.34435	0.50907	-0.37094	-0.99268	-1.12898	-0.99874	-0.41734	-0.26141	-0.0534	0.44965	-0.40964	-0.49348	-0.88051	-0.5054	-0.64588	-0.36953
282	113.252953044487	23.193582316443	730596.782456829	2566735.70695326	0		-0.98853	-0.78225	-0.48389	-0.5763	-1.0383	-1.12898	-0.99874	1.06238	1.03153	3.03833	4.33006	-0.40964	1.09952	-0.90822	-0.89507	-0.77964	-0.69414
283	113.465255925267	23.0549992980795	752595.124333847	2551737.19263222	0		1.28149	0.48952	0.92306	0.97981	1.44206	-1.11886	-0.77389	-0.50982	-0.62608	-0.5787	-0.60864	-0.40964	-0.49348	-0.10114	0.985	0.40758	0.21868
284	113.350276250373	23.1741023064411	740596.78245683	2564735.70695326	30	3.4012	-0.59776	-1.07721	-0.66622	-0.87048	-0.85184	0.96955	0.68404	0.13756	1.56196	2.6331	1.33156	0.91306	0.62162	-0.26239	-0.83323	-0.98278	-0.94879
285	113.488108571815	23.2351748205965	754596.782456831	2571735.70695326	0		2.27962	4.75735	0.51055	2.15721	4.20585	0.8542	1.33731	-0.50982	-0.62608	-0.59371	-0.60864	-0.40964	-0.49348	-0.50532	0.40852	3.00989	2.56394
286	113.292779969582	23.2381477360668	734596.782456831	2571735.70695326	13	2.56495	0.57524	-0.67232	-0.49479	-0.32013	-0.31485	-1.12898	-0.99874	-0.23238	0.00381	0.17172	0.62603	-0.40964	-0.17488	-0.4642	-0.8762	-0.61192	-0.40643
287	113.390126758416	23.2186410031503	744596.78245683	2569735.70695326	0		-0.31501	-1.0312	-0.77967	0.98936	-0.11313	0.96955	0.68404	-0.41734	-0.59293	-0.50366	-0.43226	-0.40964	-0.49348	-0.32033	0.527	-0.7977	0.03875
288	113.447401715279	23.1455393543002	750596.782456829	2561735.70695326	4	1.38629	0.80291	0.11219	-0.69853	-0.95725	-0.88864	0.96955	0.68404	-0.50982	-0.42717	-0.5787	-0.60864	0.03126	-0.49348	-0.78785	-0.29962	0.28804	-0.46615
289	113.590951531244	23.2350339669611	765125.387933301	2571904.32122595	0		-0.13228	1.51249	0.70153	0.6211	0.44226	0.8542	1.33731	-0.50982	-0.62608	-0.59371	-0.60864	-0.40964	-0.49348	1.66807	1.74016	2.17938	3.31803
290	113.369641495911	23.1647840490196	742596.78245683	2563735.70695326	9	2.19722	0.68336	0.15405	-1.27174	-0.53945	-0.14762	0.96955	0.68404	-0.50982	-0.59293	-0.54868	-0.60864	0.03126	-0.49348	0.15885	0.1755	0.12951	-0.28842
291	113.234626652739	23.2660711005313	728596.78245683	2574735.70695326	1	0	-0.75102	0.14302	-0.49646	0.01951	-0.74546	-1.12898	-0.99874	-0.50982	-0.62608	-0.5787	-0.60864	0.03126	-0.49348	-0.69662	0.95866	0.09488	0.01705
292	113.33832344626	23.0478872103148	739596.782456831	2550735.70695326	1	0	-0.31053	-0.70486	0.58615	1.0079	-0.24208	0.96273	-0.43373	-0.23238	-0.09565	-0.56369	-0.43226	-0.40964	-0.49348	-0.17747	-0.40059	0.15528	0.5465
293	113.291701797184	23.174966100346	734596.782456831	2564735.70695326	0		-0.46969	-0.0989	0.11713	0.17908	1.77966	-1.12898	-0.99874	-0.50982	-0.62608	-0.59371	-0.60864	-0.40964	-0.49348	2.45542	-0.21926	0.87266	1.08759
294	113.486771989053	23.1629774839213	754596.782456831	2563735.70695326	19	2.94444	0.32217	-0.15417	0.58726	-0.56447	0.05723	0.8542	1.33731	-0.32486	-0.39402	0.23176	0.09689	-0.40964	-0.49348	-1.03007	-0.25975	-0.7564	0.18681
295	113.544140270125	23.0988711660884	760596.782456829	2556735.70695326	9	2.19722	-0.6774	-0.56685	1.43007	-0.69469	-0.73491	0.8542	1.33731	-0.04741	0.10327	-0.11344	0.9788	-0.40964	0.14372	-0.62264	-0.86687	-0.8606	-0.77008
296	113.182987655063	23.0683864912931	723640.802242998	2552760.05996888	0		-0.52858	0.67183	1.11812	-0.84741	-0.48892	0.36414	-0.68004	-0.50982	-0.22826	-0.45863	0.09689	-0.40964	-0.49348	-0.61597	-0.53158	-0.63524	-0.65769
297	113.378446925452	23.1104840196742	743596.78245683	2557735.70695326	21	3.04452	0.22208	-0.88324	-0.6205	-0.33331	0.5159	0.96273	-0.43373	-0.41734	-0.59293	-0.54868	-0.43226	-0.40964	-0.49348	0.26679	-0.53498	-0.30018	-0.41387
298	113.514705891939	23.0903158003022	757596.782456831	2555735.70695326	0		0.61376	-0.32113	0.86136	0.55819	-0.07297	0.8542	1.33731	-0.50982	-0.62608	-0.59371	-0.60864	-0.40964	-0.49348	0.47088	-0.57182	0.12131	0.00374
299	113.349174460935	23.1109227391335	740596.78245683	2557735.70695326	15	2.70805	0.30075	-0.56628	-0.66896	-0.51945	-0.31896	0.96273	-0.43373	-0.23238	-0.29456	-0.54868	-0.60864	-0.40964	-0.49348	-1.07568	-0.66077	-0.25563	-0.40937
300	113.242586805965	23.1576166990626	729596.782456829	2562735.70695326	3	1.09861	-0.63852	-0.78974	-0.59507	-0.72284	-0.31727	0.36414	-0.68004	0.69245	-0.09565	-0.47364	-0.25588	0.03126	-0.17488	-0.26979	-0.67626	-0.43387	-0.28912
301	113.2033916496	23.1491413441718	725596.78245683	2561735.70695326	2	0.693147	-0.46642	-0.18732	-0.00783	-0.61227	0.01821	-1.12898	-0.99874	1.15487	0.5674	1.3724	0.9788	0.47216	0.30302	-0.71967	-0.57934	-0.77492	-1.0282
302	113.288337845949	22.9763916442744	734596.782456831	2542735.70695326	0		1.44992	-0.43189	1.55947	-0.75597	-0.23483	-1.11886	-0.77389	-0.50982	-0.62608	-0.59371	-0.60864	-0.40964	-0.49348	0.07014	-0.12478	-0.11051	0.65097
303	113.581460112751	23.2182280824116	764186.802083117	2570025.23598449	1	0	2.03144	1.34819	0.30511	0.98089	-0.8665	0.8542	1.33731	-0.50982	-0.59293	-0.59371	-0.60864	-0.40964	-0.49348	0.83797	2.59371	0.61876	1.37311
304	113.329036437912	23.0751088438518	738596.782456831	2553735.70695326	0		-0.77352	-0.3603	-0.98916	-0.09506	-0.45297	0.96273	-0.43373	-0.41734	-0.02934	-0.09843	-0.25588	0.03126	0.14372	-0.33646	-0.62456	-0.31474	-0.54528
305	113.438951368733	23.2178908472559	749596.782456829	2569735.70695326	0		0.77842	0.72841	2.09349	1.39682	1.23644	0.8542	1.33731	-0.50982	-0.62608	-0.5787	-0.60864	-0.40964	-0.49348	0.88897	0.76114	-0.16495	2.13889
306	113.453852049362	23.020299009751	751490.622268618	2547873.73717852	0		0.06687	-0.68148	0.68318	0.28886	-0.56598	-1.11886	-0.77389	-0.50982	-0.62608	-0.56369	-0.60864	-0.40964	-0.49348	0.10007	1.14125	0.95479	0.88124
307	113.260253489531	23.0399564356299	731607.952077788	2549731.49637301	0		2.06226	0.39848	1.79457	-0.94642	-0.20525	0.36414	-0.68004	-0.23238	-0.1288	-0.00838	0.09689	-0.40964	-0.01558	-0.32547	-0.95493	1.20688	-0.60494
308	113.416991084504	23.0828148452941	747596.78245683	2554735.70695326	4	1.38629	-1.07805	0.11791	-0.50283	-0.57757	-0.26344	0.96273	-0.43373	-0.50982	-0.62608	-0.59371	-0.60864	0.03126	-0.49348	-0.6569	-0.25671	-0.03463	-0.03798
309	113.225006927854	23.2752362185394	727596.78245683	2575735.70695326	12	2.48491	-0.01862	0.00662	-0.83921	-0.07401	-0.83534	-1.12898	-0.99874	0.87742	-0.09565	0.32181	0.62603	-0.40964	-0.17488	-0.56585	1.30191	-0.45288	-0.63357
310	113.213301314874	23.1580310090741	726596.78245683	2562735.70695326	7	1.94591	-0.91066	-0.93765	-0.94933	-0.8102	-0.09481	-1.12898	-0.99874	0.04507	0.40164	0.80208	1.68433	-0.40964	0.14372	-0.68184	-0.76373	-0.56043	-0.82819
311	113.341300133114	23.2193760204824	739596.782456831	2569735.70695326	1	0	0.10585	0.08972	-0.29429	-0.28211	0.48744	-1.12898	-0.99874	-0.04741	-0.55978	-0.56369	-0.60864	-0.40964	-0.49348	-0.2535	0.51657	0.74364	-0.27333
312	113.377018485419	23.0292540477735	743596.78245683	2548735.70695326	1	0	0.20488	-0.08105	-0.71131	-0.4147	0.23734	-1.11886	-0.77389	-0.50982	-0.62608	-0.56369	-0.60864	-0.40964	-0.49348	1.23298	-0.13008	0.33365	0.20023
313	113.467251062221	23.1632846167157	752596.782456831	2563735.70695326	39	3.66356	0.44792	-0.76099	-0.54958	-0.91643	0.06198	0.8542	1.33731	-0.32486	-0.09565	1.25233	0.27327	0.47216	2.05532	-0.47517	-1.00993	-0.59727	-0.99286
314	113.457820197919	23.1814870796483	751596.78245683	2565735.70695326	15	2.70805	0.38671	0.02545	-0.62295	-0.47506	0.40069	0.8542	1.33731	-0.41734	-0.52663	-0.5787	-0.60864	-0.40964	-0.49348	0.11598	-0.72155	-0.07964	-0.3426
315	113.358301571185	23.0746744957884	741596.78245683	2553735.70695326	1	0	-0.18853	-0.2113	-0.44503	-0.053	-0.35882	0.96273	-0.43373	-0.41734	-0.42717	-0.3986	-0.60864	-0.40964	-0.33418	0.46408	-0.40229	-0.19276	-0.25799
316	113.169248425853	23.3078303265211	721837.242321306	2579259.29203149	0		0.94366	1.58592	2.54378	2.414	2.29367	-1.12898	-0.99874	-0.50982	-0.62608	-0.59371	-0.60864	-0.40964	-0.49348	0.15547	3.33749	2.44272	1.93205
317	113.27248140547	23.1933013946329	732596.78245683	2566735.70695326	1	0	-0.47137	-0.6039	-0.58088	-0.73298	-0.73443	-1.12898	-0.99874	0.415	1.76088	2.00275	0.80242	1.35396	1.09952	-1.06313	-0.82426	-0.97154	-1.08629
318	113.347607189318	23.0206652517147	740596.78245683	2547735.70695326	4	1.38629	-0.59976	-0.31145	0.69627	-0.05951	-0.35879	-1.11886	-0.77389	0.23004	-0.46032	-0.24851	-0.25588	-0.40964	-0.49348	-0.94362	-0.09375	-0.45621	-1.03301
319	113.534384916233	23.0990281783938	759596.782456829	2556735.70695326	3	1.09861	-0.20638	-0.56821	1.26809	-0.34393	-0.45742	0.8542	1.33731	-0.41734	-0.32771	-0.33856	-0.25588	-0.40964	-0.33418	-0.3023	-0.6138	-0.23998	-0.18989
320	113.580490743512	23.1717083066246	764179.029252383	2564869.99047829	0		-0.25862	-0.62941	1.49556	0.72387	0.92416	0.8542	1.33731	-0.50982	-0.62608	-0.59371	-0.60864	-0.40964	-0.49348	1.0053	1.73836	0.45503	0.00892
321	113.351856966597	23.2643578656648	740596.78245683	2574735.70695326	0		1.54882	0.10632	-1.02992	0.5077	-0.36433	-1.12898	-0.99874	-0.41734	-0.49347	-0.56369	-0.60864	-0.40964	-0.49348	-0.53886	0.73847	-0.51125	-0.38504
322	113.24183607496	23.1124849823133	729596.782456829	2557735.70695326	3	1.09861	-0.96902	-0.96755	-1.0825	-0.66509	-0.28591	0.36414	-0.68004	3.83687	2.0924	3.75873	2.21347	2.67666	3.32973	-0.87094	-0.94363	-0.91797	-0.90267
323	113.546700725381	23.234235681325	760596.782456829	2571735.70695326	0		1.41681	0.88375	1.23516	1.59664	2.27436	0.8542	1.33731	-0.50982	-0.62608	-0.59371	-0.60864	-0.40964	-0.49348	3.70331	0.39973	2.32598	2.00398
324	113.269444690554	23.0127773836939	732596.78245683	2546735.70695326	5	1.60944	0.59208	-0.00131	0.36103	1.26106	0.03234	-1.11886	-0.77389	-0.50982	-0.55978	-0.59371	-0.60864	-0.40964	-0.49348	-0.21096	-0.88794	0.42919	0.63316
325	113.204723491523	23.2303799809931	725596.78245683	2570735.70695326	1	0	0.73269	-0.11382	0.0543	1.83065	-0.92775	-1.12898	-0.99874	-0.32486	-0.39402	-0.47364	-0.60864	-0.40964	-0.49348	-0.52164	-0.72126	-0.79355	-0.20984
326	113.521525559731	23.0310917013029	758408.846020985	2549187.18750915	0		5.30298	1.71503	0.89048	0.52192	1.65255	0.8542	1.33731	-0.50982	-0.62608	-0.59371	-0.60864	-0.40964	-0.49348	3.33443	0.23865	2.02729	2.49082
327	113.260748403233	23.0761012702948	731596.782456829	2553735.70695326	0		-0.44984	-0.48362	-0.73435	-0.59229	-0.70118	0.36414	-0.68004	-0.04741	-0.1951	-0.24851	-0.25588	-0.40964	-0.17488	-0.97456	-0.77527	-0.60164	-0.45852
328	113.426260248571	23.0555894982199	748596.782456829	2551735.70695326	0		0.82892	0.57433	-0.57013	-0.30485	1.37385	-1.11886	-0.77389	-0.41734	-0.62608	-0.59371	-0.60864	-0.40964	-0.49348	1.79579	0.17698	0.47502	1.45832
329	113.338947756418	23.0839904574311	739596.782456831	2554735.70695326	3	1.09861	-0.47433	-0.34981	-1.29301	-1.16129	-0.4859	0.96273	-0.43373	0.13756	0.5674	1.68757	1.68433	0.91306	1.41812	-0.81218	-0.90826	-0.75296	-0.21801
330	113.428860150592	23.1999919841427	748596.782456829	2567735.70695326	2	0.693147	-0.88738	-0.09139	0.63798	-0.27763	0.58308	0.8542	1.33731	-0.23238	-0.16195	-0.00838	0.62603	-0.40964	-0.01558	-0.80314	-0.33536	-0.45034	-0.56677
331	113.279651242128	23.0397159448929	733596.782456831	2549735.70695326	0		0.47163	-0.64472	0.90145	-0.13485	-0.15409	-1.11886	-0.77389	-0.41734	-0.46032	0.11169	1.15518	-0.40964	-0.49348	0.14889	-0.21517	-0.56578	-0.44858
332	113.35972188536	23.1559051041115	741596.78245683	2562735.70695326	1	0	-0.47302	-0.51085	-1.16856	-0.99488	-0.2402	0.96955	0.68404	-0.32486	0.03696	-0.29354	-0.43226	-0.40964	-0.49348	-0.0711	-0.59014	-0.50379	-0.47869
333	113.254469759985	23.2838438480642	730596.782456829	2576735.70695326	2	0.693147	-0.36522	-0.49322	-0.54413	-0.07338	-0.39875	-1.12898	-0.99874	-0.50982	-0.55978	-0.59371	-0.60864	-0.40964	-0.49348	0.38389	0.98515	0.87668	0.64633
334	113.289251595473	23.0305488546061	734596.782456831	2548735.70695326	0		0.89301	0.64069	-0.01391	-0.8666	-0.41189	-1.11886	-0.77389	0.32252	0.30218	0.71202	0.44965	-0.40964	0.30302	-0.62387	-0.83875	-0.77456	-0.10273
335	113.283473969989	23.2653678762003	733596.782456831	2574735.70695326	2	0.693147	0.49212	0.02903	-0.49446	0.03577	-0.97392	-1.12898	-0.99874	-0.50982	-0.39402	0.06666	0.27327	-0.40964	-0.33418	-1.00433	-0.71914	-0.80317	0.19611
336	113.37908386626	23.1465859343586	743596.78245683	2561735.70695326	19	2.94444	-0.32197	-0.797	-0.29573	-0.9428	-0.82772	0.96955	0.68404	0.04507	0.16957	-0.47364	-0.60864	0.03126	-0.49348	-0.54101	0.05072	0.46782	-0.46372
337	113.409333005788	23.2002923915365	746596.78245683	2567735.70695326	16	2.77259	0.39193	0.14205	-0.25616	0.03239	0.44354	0.96955	0.68404	-0.50982	-0.62608	-0.59371	-0.60864	-0.40964	-0.49348	1.22318	-0.4942	0.26271	0.10417
338	113.446746527934	23.1094392572245	750596.782456829	2557735.70695326	18	2.89037	-0.97492	-1.11871	-0.75098	-0.39678	0.12576	0.8542	1.33731	0.69245	0.16957	0.87712	0.80242	1.35396	0.30302	-0.43447	-0.71292	-0.55882	-0.61864
339	113.388204254091	23.1103365749905	744596.78245683	2557735.70695326	14	2.63906	-0.73108	-0.21849	-0.1101	-0.2576	-0.11216	0.96273	-0.43373	-0.32486	-0.52663	-0.5787	-0.60864	-0.40964	-0.49348	-0.62322	-0.73704	0.09755	-0.15113
340	113.476513687976	23.1360569612962	753596.782456831	2560735.70695326	2	0.693147	-0.35031	-0.06721	1.06553	0.63801	-0.30345	0.8542	1.33731	-0.50982	-0.55978	-0.59371	-0.60864	-0.40964	-0.49348	-0.61267	0.11659	0.81408	0.45974
341	113.254621850051	23.2928699390366	730596.782456829	2577735.70695326	2	0.693147	1.1502	-0.19797	0.02728	-0.69415	-0.26997	-1.12898	-0.99874	-0.50982	-0.55978	-0.35357	-0.25588	0.03126	-0.49348	-0.87127	1.13128	-0.10283	-0.37546
342	113.322393979178	23.2557686757912	737596.782456831	2573735.70695326	6	1.79176	-0.34309	-0.49274	-0.30755	-1.07933	-0.84465	-1.12898	-0.99874	0.415	-0.06249	0.667	0.80242	-0.40964	-0.17488	-0.74823	-0.73407	-0.7289	-0.57828
343	113.234325632195	23.2480185976293	728596.78245683	2572735.70695326	4	1.38629	0.11962	0.21821	0.0536	0.54926	-0.43747	-1.12898	-0.99874	-0.41734	-0.59293	-0.41361	-0.43226	-0.40964	-0.33418	-0.17471	0.11226	-0.69247	0.18475
344	113.23554913852	23.3109789314911	728614.413396725	2579711.24808361	2	0.693147	2.73937	-0.98258	1.19102	0.55185	-0.17983	-1.12898	-0.99874	-0.50982	-0.59293	-0.51866	-0.43226	-0.40964	-0.49348	-0.81129	1.55307	0.29837	-0.99368
345	113.359089841154	23.1198027249249	741596.78245683	2558735.70695326	12	2.48491	-0.54222	-0.25139	-1.26983	-1.04341	-0.43294	0.96955	0.68404	3.37445	3.05381	2.96329	1.50794	3.11756	1.57742	-0.89684	-0.74271	-0.92559	-0.77463
346	113.553500936788	23.1345690506959	761486.799009004	2560706.99783681	12	2.48491	1.25618	-0.36149	3.10183	-0.65834	-0.37976	0.8542	1.33731	0.13756	-0.52663	-0.59371	-0.60864	-0.40964	-0.49348	-0.53111	0.64097	0.28568	-0.04012
347	113.476679564402	23.1450817697228	753596.782456831	2561735.70695326	3	1.09861	0.51833	-0.21557	1.03263	-0.0144	-0.03583	0.8542	1.33731	-0.50982	-0.62608	-0.59371	-0.60864	-0.40964	-0.49348	0.79688	-0.11633	0.9907	0.62793
348	113.321300961843	23.1925885030781	737596.782456831	2566735.70695326	0		-0.49376	-0.02806	-0.82048	-0.48735	0.49304	-1.12898	-0.99874	0.87742	-0.09565	1.89769	1.15518	-0.40964	0.62162	0.37384	-0.67466	-0.69868	-0.24159
349	113.292934303476	23.2471736387283	734596.782456831	2572735.70695326	8	2.07944	-0.13701	-0.22158	-0.97773	-0.71421	-0.89383	-1.12898	-0.99874	-0.50982	-0.16195	0.27678	0.9788	0.03126	-0.17488	-0.69249	-0.45357	-0.66369	-0.4528
350	113.215217037172	23.0936627397187	726901.294761916	2555609.31885089	0		-0.97988	0.37137	-0.08687	0.09958	-0.6541	0.36414	-0.68004	-0.41734	-0.29456	-0.26352	-0.43226	-0.40964	-0.17488	-0.15243	-0.23186	0.63318	-0.76376
351	113.418771795027	23.1820922088591	747596.78245683	2565735.70695326	94	4.54329	1.32772	-0.39702	-0.33461	-0.90042	-0.75844	0.96955	0.68404	-0.41734	0.07011	-0.56369	-0.60864	0.03126	-0.49348	-0.37007	-0.38492	0.1589	0.01774
352	113.407557682249	23.1010145644918	746596.78245683	2556735.70695326	38	3.63759	0.0195	-0.24637	-0.12845	-0.87387	0.13816	0.96273	-0.43373	-0.50982	-0.52663	-0.59371	-0.60864	-0.40964	-0.49348	0.61279	-0.56891	0.04356	-0.17362
353	113.224257847641	23.230104632858	727596.78245683	2570735.70695326	4	1.38629	-1.02336	-0.31188	-0.05378	1.53018	-0.48066	-1.12898	-0.99874	-0.41734	-0.29456	-0.41361	-0.25588	-0.40964	-0.49348	-0.52683	-0.57912	-0.33653	-0.37183
354	113.206950587281	23.1728886082748	725921.425796465	2564371.45028666	0		0.57701	-0.4515	-0.00148	0.15748	0.75127	-1.12898	-0.99874	-0.50982	-0.59293	-0.59371	-0.60864	-0.40964	-0.49348	-0.96133	-1.05487	-0.34103	-0.57295
355	113.366794156573	23.0023232632144	742596.78245683	2545735.70695326	10	2.30259	0.18131	0.21688	0.49372	-0.54959	-0.27426	-1.11886	-0.77389	-0.32486	-0.59293	-0.5787	-0.60864	-0.40964	-0.49348	0.71491	-0.25209	-0.26931	-0.10629
356	113.3194361318	23.0842783437354	737596.782456831	2554735.70695326	5	1.60944	-0.8379	-0.11417	-0.63414	-1.09451	-0.69825	0.96273	-0.43373	1.5248	2.42392	1.83766	3.62453	0.91306	0.94022	-0.77755	-0.71195	-0.84297	-0.79617
357	113.539301104754	23.0576173431767	760180.324117161	2552157.10980042	0		3.89704	-0.02506	-0.58116	-0.38003	-0.36986	0.8542	1.33731	-0.50982	-0.62608	-0.59371	-0.60864	-0.40964	-0.49348	0.23275	-0.18071	0.56202	-0.2844
358	113.293766309218	23.2996346525209	734589.972490054	2578547.89731665	2	0.693147	0.27004	-0.60227	-0.6904	0.87117	-0.32974	-1.12898	-0.99874	-0.50982	-0.52663	-0.59371	-0.60864	-0.40964	-0.49348	0.22313	-0.31249	-0.11077	-0.10157
359	113.309217699702	23.0573434033401	736596.782456831	2551735.70695326	18	2.89037	-0.664	-0.61548	0.26662	-0.39328	-0.4261	0.96273	-0.43373	-0.41734	0.26903	-0.0384	0.09689	-0.40964	-0.33418	-0.56887	-0.5287	-0.00307	-0.45392
360	113.565368587084	23.188797259871	762596.78245683	2566735.70695326	12	2.48491	-0.68987	-0.51694	-0.17118	-1.11539	-0.80968	0.8542	1.33731	-0.04741	-0.29456	1.3874	1.15518	-0.40964	0.14372	-0.43938	2.68102	-0.7151	-0.72467
361	113.487100566201	23.0669376285042	754811.847317345	2553097.56371204	0		2.14713	0.99853	1.26687	1.71562	0.83744	0.8542	1.33731	-0.50982	-0.62608	-0.59371	-0.60864	-0.40964	-0.49348	2.862	0.09527	2.0925	2.50418
362	113.409590752705	23.2621504715225	746509.440833415	2574588.21821469	0		0.46005	0.3003	1.88066	0.78534	0.96535	-1.12898	-0.99874	-0.50982	-0.62608	-0.59371	-0.60864	-0.40964	-0.49348	0.19447	3.14022	0.08401	0.00336
363	113.281021895317	23.1209514526923	733596.782456831	2558735.70695326	20	2.99573	-0.68861	-1.00224	-0.93922	-0.92761	-0.42768	1.03026	1.28127	6.05645	4.71143	1.58251	0.80242	5.76296	3.48903	-0.76091	-0.83915	-0.87265	-0.97672
364	113.242887626824	23.1756693069707	729596.782456829	2564735.70695326	3	1.09861	-0.62644	-0.87629	-0.51331	-0.48299	-0.9509	-1.12898	-0.99874	1.24735	0.43479	1.2073	0.62603	-0.40964	0.30302	-0.43886	-0.69585	-0.63547	-0.45137
365	113.278589465127	22.9765321423686	733596.782456831	2542735.70695326	0		0.15115	-0.28442	1.71808	-0.45758	-0.75766	-1.11886	-0.77389	-0.50982	-0.62608	-0.5787	-0.60864	-0.40964	-0.49348	-0.93989	-0.25327	-0.00619	0.02946
366	113.323931575189	22.9707855797636	738257.021339073	2542172.14662463	0		-0.88641	-0.80294	-0.61071	0.15747	-0.58764	-1.11886	-0.77389	-0.50982	-0.59293	-0.53367	-0.60864	-0.40964	-0.49348	-0.9199	-0.31721	-0.8393	-1.0186
367	113.290474231768	23.1027578383503	734596.782456831	2556735.70695326	16	2.77259	-0.45293	-0.70848	-1.14601	-0.94344	-0.43489	1.03026	1.28127	3.92935	3.91577	0.42687	1.86071	-0.40964	1.25882	-0.87477	-0.96071	-0.65321	-0.93794
368	113.233424379765	23.1938608181304	728596.78245683	2566735.70695326	0		-0.42076	-0.91141	-1.04028	-0.31046	-0.78854	-1.12898	-0.99874	-0.23238	-0.22826	-0.29354	0.27327	-0.40964	-0.49348	-1.03032	-0.49058	-0.37742	-0.95872
369	113.320833699781	23.1655111160584	737596.782456831	2563735.70695326	3	1.09861	-0.65909	-0.31217	-1.10235	-0.84516	-0.5997	0.96955	0.68404	2.26466	1.95979	2.28791	0.44965	0.47216	0.78092	-0.28664	-0.7192	-0.71449	-0.91406
370	113.279955295425	23.05776835876	733596.782456831	2551735.70695326	4	1.38629	0.12666	0.20317	0.60297	-0.03597	-0.52724	0.36414	-0.68004	-0.50982	-0.52663	-0.53367	-0.60864	-0.40964	-0.49348	1.00105	-0.79565	-0.00218	-0.00232
371	113.185924786289	23.2757856778506	723596.78245683	2575735.70695326	0		1.87003	0.76212	0.21435	2.34315	1.44316	-1.12898	-0.99874	-0.50982	-0.62608	-0.59371	-0.60864	-0.40964	-0.49348	1.82986	1.86707	2.03624	1.85413
372	113.495611212553	23.2504560202467	755335.71412644	2573441.68254283	0		4.52658	5.7625	0.26632	2.03949	6.3813	0.8542	1.33731	-0.50982	-0.62608	-0.59371	-0.60864	-0.40964	-0.49348	3.318	0.68411	2.81607	3.74186
373	113.407396775332	23.0919892391606	746596.78245683	2555735.70695326	1	0	-0.41046	-0.60272	-0.53899	-0.61873	-0.75003	0.96273	-0.43373	-0.50982	-0.26141	-0.45863	-0.60864	0.47216	-0.33418	-0.46594	-0.17668	-0.43988	-0.54669
374	113.551988331058	23.1435330156469	761314.439739488	2561697.29439942	1	0	2.2872	0.29345	3.38649	-0.62758	0.12227	0.8542	1.33731	-0.41734	-0.59293	-0.59371	-0.60864	-0.40964	-0.49348	0.15585	1.16893	0.70432	0.78085
375	113.419259153214	23.2091676139128	747596.78245683	2568735.70695326	0		-0.02694	-0.41579	0.67115	0.3747	1.9402	0.8542	1.33731	-0.50982	-0.59293	-0.3986	-0.60864	-0.40964	-0.49348	-1.01371	0.15737	0.83917	0.40511
376	113.419096618958	23.2001424903183	747596.78245683	2567735.70695326	25	3.21888	0.44243	-0.65285	0.09181	-0.43957	0.65076	0.96955	0.68404	-0.41734	-0.55978	-0.44362	-0.43226	-0.40964	-0.49348	-0.06037	-0.32524	-0.07227	-0.36632
377	113.300385444368	23.1116418884049	735596.782456831	2557735.70695326	1	0	-0.20079	-0.60777	-1.17659	-0.60299	0.32613	1.03026	1.28127	0.04507	0.6337	-0.45863	-0.25588	2.23576	-0.33418	-0.90006	-0.8014	-0.36174	-0.8095
378	113.523786767728	23.0540618269727	758596.782456831	2551735.70695326	1	0	1.50402	-0.8329	-0.91137	-0.83974	-0.72019	0.8542	1.33731	-0.04741	0.43479	0.00663	-0.07949	-0.40964	-0.33418	-0.51682	-0.93167	-0.72542	-0.84267
379	113.370755769438	23.22796224998	742596.78245683	2570735.70695326	0		-0.10033	1.22201	-0.26879	1.14396	0.45028	0.96955	0.68404	-0.50982	-0.62608	-0.59371	-0.60864	-0.40964	-0.49348	1.70606	1.20834	1.06966	0.86164
380	113.562645954273	23.0836254102266	762522.847279674	2555079.98820194	0		1.79902	0.26303	1.38109	0.62799	0.85205	0.8542	1.33731	-0.50982	-0.62608	-0.59371	-0.60864	-0.40964	-0.49348	-0.1922	0.31939	0.94378	1.8487
381	113.300847389672	23.1387198521762	735596.782456831	2560735.70695326	35	3.55535	-0.7343	-0.69152	-1.06419	-1.16114	-0.62464	1.03026	1.28127	1.24735	1.52881	0.11169	-0.43226	3.99936	-0.17488	-0.48993	-0.90715	-0.70777	-0.89889
382	113.467582092466	23.1813342864166	752596.782456831	2565735.70695326	29	3.3673	0.56797	-0.54976	-0.56827	-0.336	0.78827	0.8542	1.33731	-0.50982	-0.62608	-0.5787	-0.60864	0.03126	-0.49348	0.45761	-0.45066	-0.01308	0.32924
383	113.487941205474	23.2261501937219	754596.782456831	2570735.70695326	0		0.57629	3.63876	0.41375	2.13564	3.7398	0.8542	1.33731	-0.50982	-0.62608	-0.59371	-0.60864	-0.40964	-0.49348	0.24256	-0.14611	3.14493	1.39463
384	113.506124579971	23.153643351672	756596.782456831	2562735.70695326	33	3.49651	0.104	-0.24016	2.16693	-1.18618	-0.77491	0.8542	1.33731	-0.41734	0.50109	-0.29354	-0.43226	0.03126	-0.49348	-0.95572	0.09715	-0.83572	-0.96077
385	113.341457589014	23.2284016339003	739596.782456831	2570735.70695326	3	1.09861	0.22371	0.0968	-0.7631	-1.00933	-0.41283	-1.12898	-0.99874	-0.13989	-0.29456	-0.45863	-0.25588	-0.40964	-0.33418	-0.20404	0.84221	-0.52391	-0.70146
386	113.300231617366	23.1026158778983	735596.782456831	2556735.70695326	38	3.63759	-1.14348	-1.0446	-1.34191	-1.15473	-0.86776	1.03026	1.28127	0.78494	1.23044	0.03665	0.44965	1.35396	-0.33418	-0.617	-0.58122	-0.8006	-1.04329
387	113.293243203445	23.265225410041	734596.782456831	2574735.70695326	1	0	-0.7083	-1.07124	-0.88989	-0.61822	-0.62837	-1.12898	-0.99874	0.13756	0.60055	1.5525	0.80242	-0.40964	2.05532	-0.76887	-0.27053	-0.94751	-1.03514
388	113.386127869486	22.9934983835182	744595.203539173	2544790.35382378	4	1.38629	0.29086	-0.04643	-0.67241	-0.36271	-0.74776	-1.11886	-0.77389	-0.50982	-0.55978	-0.50366	-0.60864	-0.40964	-0.49348	-0.29024	0.32591	0.33928	0.24894
389	113.270504067278	23.0759612997518	732596.78245683	2553735.70695326	0		-0.83853	-0.83765	-0.98016	-0.80665	-0.85343	0.96273	-0.43373	2.07969	0.89892	0.74204	0.9788	0.03126	1.09952	-0.9838	-0.98474	-0.71395	-0.9546
390	113.243038150585	23.1846955940263	729596.782456829	2565735.70695326	15	2.70805	-0.00529	-0.46771	-0.6624	-0.62477	-0.96355	-1.12898	-0.99874	0.04507	0.40164	0.02164	-0.07949	-0.40964	-0.33418	-0.45171	-0.84892	-0.30302	-0.98495
391	113.397000689222	23.0560360859501	745596.78245683	2551735.70695326	2	0.693147	-0.80729	-0.38195	-1.2194	-0.43245	0.05953	-1.11886	-0.77389	-0.50982	-0.06249	-0.0384	-0.43226	-0.40964	-0.33418	-0.76355	-0.49536	-0.47016	0.03524
392	113.283627879056	23.2743938064782	733596.782456831	2575735.70695326	8	2.07944	-1.06122	-0.10779	-0.60964	0.10195	-0.5741	-1.12898	-0.99874	-0.50982	-0.59293	-0.5787	-0.60864	-0.40964	-0.49348	0.08724	-0.19386	0.35273	0.65474
393	113.466589998442	23.1271851399133	752596.782456831	2559735.70695326	7	1.94591	-0.09543	-0.234	0.40975	0.76322	-0.17516	0.8542	1.33731	-0.50982	-0.36086	-0.59371	-0.60864	-0.40964	-0.49348	0.07084	-0.38295	0.06878	0.28943
394	113.23051614917	23.0436869310202	728553.388193711	2550097.90439751	0		0.78175	0.63261	0.96816	0.20451	0.41587	0.36414	-0.68004	-0.50982	-0.62608	-0.59371	-0.60864	-0.40964	-0.49348	-0.13899	0.04632	0.20713	0.606
395	113.458803417501	23.2425353393546	751583.020965716	2572499.93560457	0		3.25523	3.42641	-0.08245	0.36062	2.41164	-1.12898	-0.99874	-0.50982	-0.62608	-0.59371	-0.60864	-0.40964	-0.49348	2.63489	1.54712	1.2882	1.50041
396	113.464788691745	23.0459975591049	752564.036000071	2550739.24493905	4	1.38629	0.92482	0.24528	0.66258	0.37049	0.61442	-1.11886	-0.77389	-0.32486	-0.39402	-0.51866	-0.60864	-0.40964	-0.49348	-0.82699	1.43906	-0.98896	-1.02583
397	113.223361427454	23.1759463580774	727596.78245683	2564735.70695326	0		-0.10392	-0.3994	-1.21158	0.0822	-0.5643	-1.12898	-0.99874	0.04507	0.53425	1.08724	0.62603	0.47216	0.30302	-0.87732	-0.5394	-0.71851	-0.8845
398	113.565713196601	23.2068455061282	762596.78245683	2568735.70695326	2	0.693147	0.5491	-0.4305	-0.96587	-0.67118	-0.67794	0.8542	1.33731	-0.50982	-0.42717	-0.59371	-0.60864	-0.40964	-0.49348	-0.50215	2.36732	0.2807	0.1876
399	113.282398764125	23.2021860470842	733596.782456831	2567735.70695326	4	1.38629	-0.51138	-0.66388	-0.9552	-0.66239	-0.37541	-1.12898	-0.99874	-0.23238	-0.22826	0.11169	-0.43226	0.03126	-0.01558	-0.99856	-0.85198	-0.34789	-0.75573
400	113.553655906024	23.2410999434209	761295.432339629	2572508.6357262	0		-0.38942	1.09055	1.60463	1.14206	2.28542	0.8542	1.33731	-0.50982	-0.62608	-0.59371	-0.60864	-0.40964	-0.49348	4.18941	0.53979	3.31663	2.33506
401	113.251594493614	23.112345973278	730596.782456829	2557735.70695326	4	1.38629	-1.24736	-0.80683	-0.96845	-1.02642	-0.74008	0.36414	-0.68004	4.11431	0.76631	2.39297	3.97729	3.11756	1.57742	-0.89242	-0.84244	-0.85057	-0.9307
402	113.195399518305	23.2575962666582	724596.78245683	2573735.70695326	0		1.24993	0.28034	0.08353	2.91232	0.75348	-1.12898	-0.99874	-0.50982	-0.62608	-0.59371	-0.60864	-0.40964	-0.49348	1.83519	0.65887	1.62109	1.11543
403	113.48560687545	23.0998042120985	754596.782456831	2556735.70695326	2	0.693147	0.67755	-0.25369	-0.90743	0.21297	-0.44768	0.8542	1.33731	-0.13989	-0.32771	-0.08342	-0.43226	-0.40964	-0.49348	-0.22815	-0.93443	-0.45391	0.04318
404	113.342246053711	23.2735295303827	739596.782456831	2575735.70695326	7	1.94591	0.72903	-0.16041	-0.12645	0.01267	-0.57269	-1.12898	-0.99874	-0.50982	-0.59293	-0.51866	-0.60864	-0.40964	-0.49348	-0.41994	0.03081	0.10901	0.41792
405	113.19363429919	23.1492812808635	724597.191150541	2561736.12352587	0		-0.95593	0.20893	0.617	-0.03218	-0.69686	-1.12898	-0.99874	-0.41734	-0.06249	-0.2185	0.62603	0.03126	0.14372	-0.94918	-0.1649	-0.51228	-0.31989
406	113.409171207186	23.1912671915395	746596.78245683	2566735.70695326	4	1.38629	-0.00619	-0.96142	-0.9062	-0.80237	-0.84773	0.96955	0.68404	-0.32486	-0.29456	-0.02339	-0.07949	0.03126	-0.49348	-0.79985	-1.01945	-0.96254	-1.09625
407	113.300693330498	23.1296938755475	735596.782456831	2559735.70695326	9	2.19722	-1.15303	-0.70089	-1.15021	-1.00585	-0.69783	1.03026	1.28127	3.28197	3.45164	0.74204	1.15518	4.88116	-0.01558	-0.63397	-0.83446	-0.8706	-1.03424
408	113.463390671362	23.0287030669552	752452.973308202	2548821.08985693	0		-0.89456	-0.664	0.7793	0.1513	-0.89574	-1.11886	-0.77389	-0.50982	-0.52663	-0.33856	-0.07949	-0.40964	-0.17488	-0.50331	1.63152	-0.71709	-0.78323
409	113.386769967574	23.0291071797658	744596.78245683	2548735.70695326	2	0.693147	-0.54211	0.5006	-0.69082	0.05042	0.8387	-1.11886	-0.77389	-0.23238	-0.52663	-0.59371	-0.60864	-0.40964	-0.49348	-0.0004	-0.35204	-0.16135	-0.36532
410	113.526806647497	23.2342116525338	758560.204251573	2571697.44986858	0		1.30277	2.85001	1.93223	2.58372	2.84008	0.8542	1.33731	-0.50982	-0.62608	-0.59371	-0.60864	-0.40964	-0.49348	3.0647	-0.14038	1.07396	2.14449
411	113.497370330439	23.2079460981063	755596.782456831	2568735.70695326	0		2.43535	1.23273	-1.026	0.93028	3.62394	0.8542	1.33731	-0.32486	-0.49347	-0.50366	-0.60864	-0.40964	-0.49348	-0.93039	-0.63231	2.19997	-0.52263
412	113.301927973407	23.2019013719755	735596.782456831	2567735.70695326	0		-0.36281	0.09736	-0.94498	-0.47461	-0.06993	-1.12898	-0.99874	-0.50982	-0.62608	-0.59371	-0.60864	-0.40964	-0.49348	1.31131	0.06527	-0.13469	0.63789
413	113.3883640205	23.1193620065856	744596.78245683	2558735.70695326	0		-0.34701	-0.64043	-0.64008	-0.81954	-0.83412	0.96955	0.68404	0.87742	1.59512	0.71202	0.62603	0.03126	0.62162	-0.53061	-0.85445	-0.67567	-0.78745
414	113.514034491748	23.0542172968739	757596.782456831	2551735.70695326	0		0.67602	-0.22824	-0.4309	-0.45448	-0.68667	0.8542	1.33731	-0.50982	-0.55978	-0.59371	-0.60864	-0.40964	-0.49348	-0.085	-0.44171	0.00779	-0.032
415	113.269898251877	23.0398562722845	732596.78245683	2549735.70695326	2	0.693147	0.53049	-0.33885	1.29684	-0.12072	-0.58866	-1.11886	-0.77389	-0.41734	-0.49347	-0.17347	0.27327	-0.40964	-0.49348	-0.92137	-0.52911	-0.04206	0.02706
416	113.495863437517	23.1267243362391	755596.782456831	2559735.70695326	0		1.87619	1.22067	1.0057	0.38486	-0.50283	0.8542	1.33731	-0.50982	-0.55978	-0.59371	-0.60864	-0.40964	-0.49348	3.20206	0.82729	1.39043	-0.02923
417	113.397320638052	23.0740869453702	745596.78245683	2553735.70695326	0		-0.57908	-0.0868	-1.10006	-0.93486	0.86118	0.96273	-0.43373	-0.41734	-0.59293	-0.59371	-0.60864	-0.40964	-0.49348	-0.48531	-0.25962	0.18971	0.75649
418	113.379722088347	23.1826876671399	743596.78245683	2565735.70695326	0		-1.16689	-0.23675	-0.84693	-0.58193	-0.15461	0.96955	0.68404	-0.50982	-0.59293	-0.59371	-0.60864	-0.40964	-0.49348	1.13678	-0.56442	0.26913	0.20095
419	113.244245063591	23.2569054844327	729596.782456829	2573735.70695326	7	1.94591	0.29451	-0.24658	-0.90937	0.18843	-0.92999	-1.12898	-0.99874	-0.32486	-0.46032	-0.17347	-0.43226	0.03126	-0.49348	-0.79505	0.89199	-0.08695	-0.31869
420	113.388523867245	23.1283874268144	744596.78245683	2559735.70695326	16	2.77259	-1.00629	-0.64374	-0.68323	-0.45868	-0.8062	0.96955	0.68404	2.07969	1.52881	4.20898	1.86071	0.03126	3.01113	-0.41335	-0.91183	-0.95568	-0.93456
421	113.376860169032	23.0202284386859	743596.78245683	2547735.70695326	10	2.30259	-0.82197	-0.55871	-0.0124	-0.51939	-0.84918	-1.11886	-0.77389	-0.50982	-0.55978	-0.36858	-0.25588	-0.40964	-0.17488	0.8803	-0.46271	-0.76535	-0.09837
422	113.436175803457	23.0644646095773	749596.782456829	2552735.70695326	0		1.23025	0.05116	-0.21204	0.51161	1.34236	0.8542	1.33731	-0.50982	-0.59293	-0.59371	-0.60864	-0.40964	-0.49348	2.55375	-0.25163	1.20578	0.97184
423	113.428045434658	23.1548665209896	748596.782456829	2562735.70695326	0		0.65744	-0.13139	-1.32675	-0.29221	-0.38384	0.96955	0.68404	-0.32486	-0.52663	-0.50366	-0.60864	0.03126	-0.49348	-0.38669	-0.4303	0.37066	0.32245
424	113.308448412694	23.0122132096716	736596.782456831	2546735.70695326	7	1.94591	-1.16633	-1.04768	-0.28184	-0.31187	-0.78868	-1.11886	-0.77389	-0.13989	0.36848	0.65199	1.68433	-0.40964	0.30302	-0.59731	-0.23708	-0.77507	-0.62054
425	113.419852585086	23.2540971832496	747574.579660708	2573713.63280011	0		2.50248	1.58252	1.31931	1.92269	0.73431	-1.12898	-0.99874	-0.50982	-0.59293	-0.59371	-0.60864	-0.40964	-0.49348	1.28122	2.86199	1.76281	1.40431
426	113.331848249729	23.2375725483862	738596.782456831	2571735.70695326	0		0.10918	-0.28486	0.00151	-0.24407	0.30584	-1.12898	-0.99874	-0.50982	-0.62608	-0.59371	-0.60864	-0.40964	-0.49348	1.60559	0.05406	0.09251	0.324
427	113.301464400964	23.1748236456555	735596.782456831	2564735.70695326	0		-1.20774	-0.73789	-0.1708	0.19296	1.08465	-1.12898	-0.99874	-0.50982	-0.59293	-0.54868	-0.60864	-0.40964	-0.17488	2.29794	0.0027	-0.18911	1.17172
428	113.360831022407	23.2190838303382	741596.78245683	2569735.70695326	0		-0.0205	-0.06026	-0.13804	0.55572	-0.74917	0.96955	0.68404	-0.50982	-0.55978	-0.51866	-0.43226	-0.40964	-0.49348	0.01729	0.67265	-0.74717	-0.79629
429	113.418447297042	23.1640418817308	747596.78245683	2563735.70695326	2	0.693147	-0.36547	0.01423	-1.23992	-0.83217	-0.83078	0.96955	0.68404	0.415	0.66685	0.27678	0.62603	0.03126	0.62162	-0.62664	-0.38188	-0.88362	-0.63451
430	113.252348485732	23.1574773876985	730596.782456829	2562735.70695326	2	0.693147	-1.02788	-0.8025	-1.2956	-0.92999	-0.20858	1.03026	1.28127	1.70976	3.41849	2.28791	3.80091	0.47216	1.73672	-0.48531	-0.87611	-0.88113	-1.06656
431	113.515884096949	23.153487739715	757596.782456831	2562735.70695326	16	2.77259	0.88946	-0.34848	2.80342	-0.88483	-0.39929	0.8542	1.33731	-0.50982	-0.62608	-0.56369	-0.60864	0.03126	-0.49348	-0.09184	0.34251	0.01459	-0.33442
432	113.282092255273	23.1841339940694	733596.782456831	2565735.70695326	9	2.19722	-1.08753	-0.6529	-0.23247	-0.10743	0.62633	-1.12898	-0.99874	-0.04741	-0.36086	-0.56369	-0.43226	1.79486	-0.33418	-0.56788	-0.77672	-0.35532	0.40268
433	113.448058220573	23.181639268529	750596.782456829	2565735.70695326	26	3.2581	-0.80943	-0.07368	-0.15911	-1.13024	-0.45483	0.8542	1.33731	-0.32486	-0.02934	-0.29354	0.27327	0.47216	-0.49348	-0.69629	-0.89436	-0.2962	-0.2456
434	113.536083223217	23.1892721600955	759596.782456829	2566735.70695326	0		0.28681	0.19357	0.76111	0.57956	1.23435	0.8542	1.33731	-0.50982	-0.62608	-0.5787	-0.60864	-0.40964	-0.49348	2.57321	1.1257	1.15381	1.00799
435	113.468411123212	23.2264582600541	752596.782456831	2570735.70695326	0		1.67854	3.96295	0.84059	1.95756	1.09598	0.8542	1.33731	-0.50982	-0.62608	-0.59371	-0.60864	-0.40964	-0.49348	1.30032	0.46774	2.35153	3.47521
436	113.397640909054	23.0921377593661	745596.78245683	2555735.70695326	1	0	-1.11537	-0.99029	-1.11027	-0.23633	-0.7741	0.96273	-0.43373	0.87742	0.36848	0.41186	0.27327	2.23576	0.94022	-0.56286	-0.31469	-0.94155	-0.88045
437	113.298544620031	23.0033290182981	735596.782456831	2545735.70695326	1	0	-0.47665	-0.6829	-0.49378	-0.64323	-0.33624	-1.11886	-0.77389	-0.41734	-0.52663	-0.50366	-0.60864	-0.40964	-0.49348	0.0243	-0.27281	-0.05441	-0.20465
438	113.211821281446	23.0677654968708	726596.78245683	2552735.70695326	1	0	-0.20594	-0.06225	-0.90842	-0.35811	-0.0221	0.36414	-0.68004	-0.32486	0.40164	0.1267	0.44965	-0.40964	-0.49348	-0.84332	-0.97651	-0.77954	-0.49487
439	113.308755895012	23.0302653209349	736596.782456831	2548735.70695326	6	1.79176	0.25728	-0.67644	0.34034	-1.08436	-0.88796	-1.11886	-0.77389	1.24735	0.5674	0.33681	-0.07949	-0.40964	1.57742	-0.49654	-0.2303	-0.87346	-1.0368
440	113.34838983905	23.0657941368129	740596.78245683	2552735.70695326	0		-0.93921	-0.51246	0.23016	0.62617	-0.1814	0.96273	-0.43373	-0.32486	-0.02934	0.35182	-0.07949	-0.40964	0.78092	-0.52352	-0.04881	-0.98191	-0.61756
441	113.445440100823	23.0372385154854	750596.782456829	2549735.70695326	0		-0.00028	-0.72631	-0.68557	-0.86679	0.18147	-1.11886	-0.77389	-0.50982	-0.52663	-0.3986	-0.07949	-0.40964	-0.49348	0.31511	0.69499	-0.4768	-0.3714
442	113.337389335941	22.9937320008453	739596.782456831	2544735.70695326	3	1.09861	-0.31835	-0.21902	0.11878	0.03181	0.5009	-1.11886	-0.77389	0.87742	0.30218	0.87712	-0.07949	0.91306	1.41812	-0.19506	-0.70092	-0.7824	-0.75277
443	113.497706120911	23.2259952521474	755596.782456831	2570735.70695326	0		2.27478	3.28604	0.3466	2.37036	4.97828	0.8542	1.33731	-0.50982	-0.62608	-0.59371	-0.60864	-0.40964	-0.49348	-0.18985	-0.05405	1.75876	0.9375
444	113.310297959526	23.1205252008209	736596.782456831	2558735.70695326	2	0.693147	-0.21696	-0.81488	-0.61437	-1.06265	-0.79153	1.03026	1.28127	5.40907	3.78316	2.42298	0.62603	3.55846	3.17043	-0.649	-0.95039	-0.90123	-1.04727
445	113.26914269706	22.9947247351689	732596.78245683	2544735.70695326	1	0	-0.22175	-0.54851	0.91985	0.02484	-0.36412	-1.11886	-0.77389	-0.32486	0.26903	-0.2185	-0.25588	-0.40964	-0.49348	-1.00509	-0.77332	-0.84453	-0.2142
446	113.224856961597	23.2662099239704	727596.78245683	2574735.70695326	7	1.94591	-1.04244	0.34767	-0.63694	0.40731	-0.49849	-1.12898	-0.99874	-0.32486	-0.39402	-0.2185	-0.25588	-0.40964	-0.33418	-0.22373	0.75594	-0.44299	-0.40996
447	113.466095071953	23.1001104122033	752596.782456831	2556735.70695326	4	1.38629	-1.23139	-0.49044	-0.7611	-0.65857	0.46867	0.8542	1.33731	1.33983	0.66685	-0.02339	-0.43226	0.03126	-0.17488	-1.05474	-0.80303	-0.72197	-0.89112
448	113.312003207809	23.2198097633294	736596.782456831	2569735.70695326	1	0	-0.718	-0.05389	-0.159	0.27415	-0.30278	-1.12898	-0.99874	0.32252	-0.1951	-0.53367	-0.25588	0.03126	-0.33418	-0.18654	-0.76211	-0.74284	-0.42609
449	113.242654781995	23.3160453827453	729332.617970663	2580283.66938694	0		2.10638	-0.24628	1.59984	0.6524	0.59978	-1.12898	-0.99874	-0.50982	-0.62608	-0.59371	-0.60864	-0.40964	-0.49348	1.39808	1.10716	1.57174	0.19307
450	113.450050288625	23.0144998612235	751111.568190063	2547224.83386021	0		0.19717	-0.91524	0.94	-0.19433	-0.53555	-1.11886	-0.77389	-0.50982	-0.62608	-0.59371	-0.60864	-0.40964	-0.49348	-0.02948	0.95137	0.52781	0.39655
451	113.435850823358	23.0464142472819	749596.782456829	2550735.70695326	1	0	-0.12972	0.18169	-0.98544	0.27752	-0.59192	-1.11886	-0.77389	-0.41734	-0.46032	-0.3986	-0.07949	-0.40964	-0.49348	-0.83882	0.52115	-0.34255	0.47078
452	113.26424053834	23.283703081478	731596.782456829	2576735.70695326	0		-0.89148	-0.42731	0.06569	0.41154	0.53935	-1.12898	-0.99874	-0.50982	-0.62608	-0.59371	-0.60864	-0.40964	-0.49348	0.99734	0.62454	0.95022	0.13712
453	113.203539335008	23.1581679043217	725596.78245683	2562735.70695326	2	0.693147	-0.58785	-0.87078	-0.24436	-0.89252	-0.61384	-1.12898	-0.99874	0.87742	0.23588	0.65199	-0.07949	0.03126	-0.01558	-0.51348	-0.91145	-0.53192	-0.63349
454	113.338011762351	23.0298355189682	739596.782456831	2548735.70695326	5	1.60944	0.37084	-0.35625	0.93486	-0.28917	0.02217	-1.11886	-0.77389	0.04507	-0.06249	-0.47364	-0.07949	-0.40964	-0.17488	-0.33867	-0.843	-0.53749	-0.7515
455	113.308294787709	23.0031871371529	736596.782456831	2545735.70695326	4	1.38629	-0.78116	-0.25777	-0.02585	0.0635	-0.16559	-1.11886	-0.77389	-0.04741	-0.02934	-0.53367	-0.43226	-0.40964	0.14372	-0.6088	-0.05148	-0.66558	-0.29559
456	113.340357055012	23.1652221014323	739596.782456831	2563735.70695326	10	2.30259	-0.70326	-0.24686	-1.36265	-1.09096	-0.24364	0.96955	0.68404	-0.23238	0.53425	-0.32356	-0.25588	0.03126	-0.01558	-0.16014	-0.70804	-0.37326	-0.27102
457	113.477676574252	23.199230379624	753596.782456831	2567735.70695326	0		-0.11545	0.74034	-0.18648	-0.37172	1.42348	0.8542	1.33731	-0.50982	-0.59293	-0.59371	-0.60864	-0.40964	-0.49348	0.48402	-0.75036	0.29951	0.20073
458	113.211968950021	23.0767920985512	726596.78245683	2553735.70695326	0		-0.27824	-0.37666	-0.78341	0.3356	-0.66821	0.36414	-0.68004	0.13756	0.33533	0.44187	0.80242	0.03126	-0.17488	-0.58797	-0.42721	-0.67155	-1.03954
459	113.351540188871	23.2463068448374	740596.78245683	2572735.70695326	0		-0.73904	-0.90728	-0.48191	0.66431	-0.93627	-1.12898	-0.99874	0.415	0.36848	2.85823	2.38985	-0.40964	0.94022	-0.38645	0.84484	-0.70388	-0.79324
460	113.517589417834	23.2403212942815	757604.871280438	2572357.86178844	0		2.54765	3.72056	1.78345	3.54718	4.29569	0.8542	1.33731	-0.50982	-0.62608	-0.59371	-0.60864	-0.40964	-0.49348	0.6012	-0.324	2.12552	3.22896
461	113.221724990639	23.0766551362238	727596.78245683	2553735.70695326	6	1.79176	-0.67148	-0.66727	-0.83145	0.00901	-0.50583	0.36414	-0.68004	0.04507	-0.26141	-0.27853	-0.07949	0.91306	-0.17488	-0.55294	-0.45985	-0.31975	-0.83254
462	113.396042773853	23.0018832354408	745596.78245683	2545735.70695326	3	1.09861	-0.12705	-0.55181	-1.09414	-0.01838	-0.84468	-1.11886	-0.77389	0.04507	0.13642	0.74204	0.80242	-0.40964	0.46232	-0.83278	-0.06209	-0.76169	-0.84742
463	113.339729912929	23.1291192618171	739596.782456831	2559735.70695326	8	2.07944	-1.07994	-0.26385	-0.92712	-0.8766	-0.66279	0.96955	0.68404	1.98721	4.91034	7.03057	2.38985	1.35396	3.17043	-0.47043	-0.90789	-0.82152	-0.85116
464	113.195251672021	23.2485697709639	724596.78245683	2572735.70695326	0		0.14732	1.3816	0.69645	3.38457	0.01235	-1.12898	-0.99874	-0.50982	-0.62608	-0.59371	-0.60864	-0.40964	-0.49348	2.35211	0.31753	1.07455	0.41694
465	113.350433965348	23.1831279135222	740596.78245683	2565735.70695326	22	3.09104	0.37151	-0.05336	-1.20272	-0.97383	-0.30269	0.96955	0.68404	-0.41734	0.16957	-0.27853	-0.43226	-0.40964	-0.49348	-0.37594	-0.79311	-0.91856	-0.93541
466	113.515547043884	23.1354386715737	757596.782456831	2560735.70695326	0		-0.22019	1.636	2.42741	-0.95097	-0.73992	0.8542	1.33731	-0.41734	-0.42717	-0.5787	-0.25588	-0.40964	-0.33418	-0.48822	1.33184	-0.18478	0.63648
467	113.527000360502	23.225526794044	758596.782456831	2570735.70695326	0		-0.47135	1.7523	1.49907	2.07211	1.65522	0.8542	1.33731	-0.50982	-0.62608	-0.56369	-0.60864	-0.40964	-0.49348	2.07275	0.39616	-0.26873	0.8633
468	113.270049591364	23.0488825460144	732596.78245683	2550735.70695326	0		-0.1418	-0.92295	1.11058	0.15317	-1.04665	0.36414	-0.68004	-0.50982	-0.52663	-0.41361	-0.43226	-0.40964	-0.49348	-0.45787	-0.45961	0.0884	0.27182
469	113.455028081667	23.0280623036135	751596.78245683	2548735.70695326	0		-0.70932	-0.38766	0.29773	-0.33843	0.08668	-1.11886	-0.77389	-0.32486	-0.62608	-0.56369	-0.60864	-0.40964	-0.49348	-0.35678	1.15331	0.50277	0.35044
470	113.320522582586	23.1474594680708	737596.782456831	2561735.70695326	18	2.89037	-0.13199	-0.78185	-1.05578	-0.80157	0.04714	0.96955	0.68404	0.50749	1.13099	0.69702	0.62603	1.79486	1.09952	-0.50076	-0.77746	-0.78966	-0.82193
471	113.261958486778	23.1483112727322	731596.782456829	2561735.70695326	15	2.70805	-1.0346	-1.01924	-1.13362	-0.96045	-0.77051	1.03026	1.28127	1.43231	2.22501	0.08167	1.50794	2.23576	0.62162	-0.57443	-0.81352	-0.94318	-1.08717
472	113.465600891591	23.0730355816555	752596.782456831	2553735.70695326	0		1.30119	0.66413	0.94112	1.17376	2.27811	0.8542	1.33731	-0.50982	-0.62608	-0.59371	-0.60864	-0.40964	-0.49348	3.08035	0.29042	1.55763	1.61766
473	113.367740405418	23.0564772664055	742596.78245683	2551735.70695326	0		-0.66195	-0.84497	-0.8841	-0.75446	-0.49039	0.96273	-0.43373	-0.50982	-0.16195	-0.48865	-0.60864	0.47216	-0.49348	-0.68209	-0.28095	-0.65784	-0.50912
474	113.417637476826	23.1189158643027	747596.78245683	2558735.70695326	4	1.38629	-0.82456	-0.26838	-0.0096	-0.58612	-0.56132	0.96955	0.68404	0.32252	2.1587	2.39297	2.74262	1.35396	2.69253	-0.96193	-0.84358	-0.9401	-1.12872
475	113.499438856343	23.0589345162664	756091.664939083	2552232.60187475	0		1.86353	0.87937	0.52346	0.70817	1.28383	0.8542	1.33731	-0.50982	-0.62608	-0.59371	-0.60864	-0.40964	-0.49348	0.85656	0.42713	1.27483	0.97935
476	113.457161081128	23.145387429404	751596.78245683	2561735.70695326	7	1.94591	-0.45711	-0.26237	-0.03808	-1.01976	-0.89709	0.8542	1.33731	-0.50982	0.07011	-0.02339	-0.07949	-0.40964	-0.49348	-0.91774	-0.79626	-0.84816	-0.98031
477	113.505285839924	23.1085202575079	756596.782456831	2557735.70695326	0		0.62041	0.15157	0.62699	0.91769	-0.62411	0.8542	1.33731	-0.50982	-0.62608	-0.50366	-0.60864	-0.40964	-0.49348	-0.44967	0.2884	-0.59108	1.54589
478	113.437805617355	23.1547157373022	749596.782456829	2562735.70695326	1	0	0.79133	-0.75576	-0.72235	-0.9261	-0.77494	0.96955	0.68404	-0.23238	-0.1951	-0.41361	-0.43226	0.03126	-0.49348	-0.86413	-0.35958	-0.78323	0.02443
479	113.195796337101	23.213216956911	724711.746103324	2568820.89572863	0		0.74419	0.25265	-0.19348	1.16054	0.65926	-1.12898	-0.99874	-0.50982	-0.62608	-0.59371	-0.60864	-0.40964	-0.49348	1.07692	-0.20319	0.60306	1.17679
480	113.534215554501	23.090003716981	759596.782456829	2555735.70695326	0		-1.12933	-0.69411	0.56511	-1.10615	-0.47901	0.8542	1.33731	0.23004	0.5674	-0.17347	0.80242	0.91306	0.94022	-1.00164	-0.59203	-0.53736	-0.90838
481	113.429349962317	23.2270671248666	748596.782456829	2570735.70695326	0		-0.43977	-0.53544	1.78348	2.07814	2.14617	0.8542	1.33731	-0.50982	-0.52663	-0.5787	-0.60864	-0.40964	-0.33418	0.16005	1.31081	0.47627	1.11589
482	113.302392244236	23.2289789963667	735596.782456831	2570735.70695326	15	2.70805	-0.97185	-0.45102	-0.64483	-0.00385	-0.46993	-1.12898	-0.99874	4.2068	1.52881	2.12282	1.50794	-0.40964	2.53322	-0.83667	-0.55844	-0.85329	-0.9292
483	113.358774295269	23.1017514672686	741596.78245683	2556735.70695326	10	2.30259	-0.45919	-0.71285	-0.74154	-0.31759	0.08251	0.96273	-0.43373	-0.50982	-0.46032	-0.47364	-0.43226	3.11756	-0.33418	-0.36612	-0.88331	-0.42448	-0.50318
484	113.378924510998	23.1375604727317	743596.78245683	2560735.70695326	38	3.63759	0.1138	-0.85421	-0.65988	-0.9869	-0.66371	0.96955	0.68404	0.59997	0.5674	0.27678	-0.43226	0.47216	0.46232	-0.65218	-0.35606	-0.37842	-0.40482
485	113.253002400549	23.0099475244019	730915.812998093	2546396.24939752	0		0.57484	-0.34678	1.56738	1.58944	1.82218	-1.11886	-0.77389	-0.50982	-0.62608	-0.59371	-0.60864	-0.40964	-0.49348	0.97563	-0.37094	0.80535	1.79008
486	113.211673687181	23.0587388839902	726596.78245683	2551735.70695326	1	0	-0.6302	-0.32779	-0.33488	-0.98533	-0.38556	0.36414	-0.68004	-0.04741	-0.36086	-0.42861	0.09689	-0.40964	-0.33418	0.07865	-0.62341	-0.37294	-0.63185
487	113.25219753571	23.1484511273347	730596.782456829	2561735.70695326	1	0	-1.03527	-0.65617	-0.70358	-0.8101	-0.25823	0.36414	-0.68004	1.15487	2.49023	1.28234	2.74262	0.91306	0.30302	-0.87801	-1.0117	-0.87764	-1.00056
488	113.478176206132	23.2263045296977	753596.782456831	2570735.70695326	0		0.18966	4.01726	0.73112	2.10008	2.39089	0.8542	1.33731	-0.50982	-0.62608	-0.59371	-0.60864	-0.40964	-0.49348	1.81262	0.06925	3.49112	2.33666
489	113.312625635661	23.2559129006365	736596.782456831	2573735.70695326	9	2.19722	-0.907	-0.39302	-0.91467	-0.91972	-0.64856	-1.12898	-0.99874	2.26466	-0.06249	2.78319	0.9788	-0.40964	0.46232	-0.12615	-0.68885	-0.70087	-0.42975
490	113.261504134952	23.121232606256	731596.782456829	2558735.70695326	5	1.60944	-0.93677	-0.87099	-1.16754	-1.05719	-0.47054	1.03026	1.28127	7.62866	2.29131	1.89769	1.68433	3.11756	1.41812	-0.74597	-0.80651	-0.82278	-0.95489
491	113.427720120645	23.1368162558001	748596.782456829	2560735.70695326	41	3.71357	-0.30859	-0.66923	-0.49968	0.17101	-0.90325	0.96955	0.68404	-0.41734	-0.39402	-0.44362	-0.60864	-0.40964	-0.49348	-0.18061	0.14866	-0.19878	-0.20034
492	113.240788217899	23.0493001068241	729596.782456829	2550735.70695326	0		-0.34047	-0.50289	0.92291	-0.63215	-0.02987	0.36414	-0.68004	-0.41734	-0.49347	-0.47364	-0.07949	-0.40964	-0.49348	-0.26791	-0.62116	0.67058	-0.46085
493	113.516728212095	23.1986102088869	757596.782456831	2567735.70695326	0		-0.26354	0.05457	0.27493	1.21766	1.58554	0.8542	1.33731	-0.50982	-0.62608	-0.59371	-0.60864	-0.40964	-0.49348	2.14353	0.61374	1.81713	1.05735
494	113.259242634597	22.9858377556296	731596.782456829	2543735.70695326	0		-0.80769	-0.45656	1.91935	-0.11441	-0.40365	-1.11886	-0.77389	-0.41734	-0.55978	-0.24851	-0.07949	-0.40964	-0.49348	-0.50904	-0.95127	-0.97585	-0.7887
495	113.445114315318	23.0191882161436	750596.782456829	2547735.70695326	0		-0.30259	-1.10993	0.46703	-0.00582	-0.15831	-1.11886	-0.77389	-0.50982	-0.59293	-0.56369	-0.43226	-0.40964	-0.49348	0.61974	0.67848	0.82804	0.62024
496	113.405782922879	23.0017442111863	746595.819907735	2545736.67173134	1	0	1.049	0.07139	-0.82538	0.21377	-0.45744	-1.11886	-0.77389	-0.50982	-0.55978	-0.59371	-0.43226	-0.40964	-0.49348	0.1547	0.27723	0.03631	-0.17025
497	113.515042099006	23.1083649832352	757596.782456831	2557735.70695326	0		0.06881	0.56936	1.30653	0.58663	0.15887	0.8542	1.33731	-0.41734	-0.42717	-0.56369	-0.43226	-0.40964	0.14372	-0.44803	0.49319	0.04171	0.90666
498	113.308602115121	23.0212392709334	736596.782456831	2547735.70695326	3	1.09861	-0.8374	-0.43516	-0.1225	-1.08047	-0.7163	-1.11886	-0.77389	1.15487	1.36305	1.94271	1.50794	1.79486	1.57742	-0.32298	-0.28697	-0.88451	-1.00523
499	113.168083746454	23.2794045716093	721765.231926352	2576109.10730169	0		0.56316	2.84393	1.53686	3.5014	3.056	-1.12898	-0.99874	-0.50982	-0.62608	-0.59371	-0.60864	-0.40964	-0.49348	2.07295	2.67288	4.70264	4.12683
500	113.192523434276	23.0769967556559	724603.738742529	2553728.33770097	8	2.07944	0.60002	0.04257	0.47813	-0.42148	-0.08571	0.36414	-0.68004	-0.13989	-0.52663	0.06666	0.44965	-0.40964	-0.17488	-0.87752	-0.40163	-0.82418	-0.32051
501	113.436013272507	23.0554394341207	749596.782456829	2551735.70695326	1	0	-0.72574	0.01057	-0.30689	0.52724	0.66069	-1.11886	-0.77389	-0.50982	-0.62608	-0.59371	-0.60864	-0.40964	-0.49348	1.54787	0.25868	0.80691	0.87251
502	113.348860375335	23.092871332168	740596.78245683	2555735.70695326	1	0	0.36301	0.02395	-0.95022	-0.77801	-0.35541	0.96273	-0.43373	-0.41734	-0.22826	-0.54868	-0.60864	0.03126	-0.49348	0.55971	-0.84571	-0.33734	-0.34071
503	113.535572835113	23.1621990864263	759596.782456829	2563735.70695326	4	1.38629	-0.47748	1.3025	2.36683	-0.4486	0.0731	0.8542	1.33731	-0.23238	-0.52663	-0.45863	-0.43226	-0.40964	0.14372	0.34053	0.94375	0.09246	-0.30162
504	113.241986070263	23.1215113481605	729596.782456829	2558735.70695326	5	1.60944	-0.57139	-0.71221	-0.71682	-1.05496	-0.47526	0.36414	-0.68004	4.2068	2.39077	1.94271	3.09538	5.32206	1.73672	-0.7434	-0.90565	-0.90816	-0.78385
505	113.222319011767	23.1127611922928	727596.78245683	2557735.70695326	6	1.79176	-0.22399	-0.51927	-0.45117	-0.34273	-0.00374	0.36414	-0.68004	-0.32486	-0.36086	-0.53367	-0.60864	2.67666	-0.17488	0.73527	-0.54634	-0.21822	-0.25962
506	113.289404155849	23.0395750169809	734596.782456831	2549735.70695326	0		1.29824	-0.14672	0.68091	-0.97016	-0.86248	-1.11886	-0.77389	0.23004	-0.22826	0.63698	0.09689	-0.40964	-0.01558	-0.67602	-0.67511	-0.6141	-0.67902
507	113.327640048613	22.9938756174801	738596.782456831	2544735.70695326	6	1.79176	-0.9694	-0.88816	0.17034	0.19608	0.30187	-1.11886	-0.77389	-0.32486	0.03696	-0.27853	0.09689	0.03126	2.53322	-0.74133	-0.96254	-0.62517	-0.39721
508	113.310143403725	23.111499263625	736596.782456831	2557735.70695326	1	0	-0.29133	-0.80071	-0.87122	-0.63388	-0.68091	1.03026	1.28127	0.78494	1.13099	-0.26352	-0.07949	2.67666	-0.01558	-0.24602	-0.71825	-0.69315	-0.80784
509	113.399891842991	23.2184921829754	745596.78245683	2569735.70695326	0		-0.30996	0.10748	-0.23044	1.61987	-0.01271	0.96955	0.68404	-0.50982	-0.62608	-0.59371	-0.60864	-0.40964	-0.49348	2.05994	0.49898	0.40717	1.07272
510	113.389164058057	23.1644889939939	744596.78245683	2563735.70695326	7	1.94591	0.04239	-0.36263	-0.13608	-0.12031	-0.43358	0.96955	0.68404	-0.32486	-0.39402	-0.30855	-0.25588	-0.40964	-0.33418	-0.08462	-0.28874	-0.41291	-0.13987
511	113.467913455214	23.1993839102776	752596.782456831	2567735.70695326	1	0	0.55145	1.14706	0.50793	0.14777	0.03448	0.8542	1.33731	-0.50982	-0.59293	-0.59371	-0.60864	-0.40964	-0.49348	-0.09637	-0.55944	1.22749	1.14312
512	113.203931433825	23.0520833326161	725814.387230231	2550986.57153327	0		1.07364	-0.93058	0.39292	-0.36855	0.20097	0.36414	-0.68004	-0.32486	-0.55978	-0.42861	-0.07949	-0.40964	-0.49348	-0.45311	-0.07447	-0.3077	-0.79023
513	113.262261768704	23.1663636606972	731596.782456829	2563735.70695326	5	1.60944	-0.91072	-0.74706	-1.02865	-0.8905	-0.61867	-1.12898	-0.99874	1.15487	3.5511	1.50747	3.62453	1.35396	1.09952	-1.03813	-0.8918	-0.60212	-0.86202
514	113.585054188014	23.2325122943603	764526.619087032	2571614.20161083	0		-1.14534	1.89211	0.76095	0.88746	0.9747	0.8542	1.33731	-0.50982	-0.62608	-0.59371	-0.60864	-0.40964	-0.49348	2.81302	1.7957	2.33491	2.4394
515	113.187879775127	23.1501823666629	724006.31060306	2561827.06222037	0		-0.75386	0.70456	0.98822	0.39239	-0.0843	-1.12898	-0.99874	-0.50982	-0.62608	-0.59371	-0.60864	-0.40964	-0.49348	-0.38526	0.08997	0.30652	0.46699
516	113.205614732359	23.2845385657924	725596.78245683	2576735.70695326	0		-0.70311	-0.24848	-0.61069	0.55704	0.1864	-1.12898	-0.99874	-0.50982	-0.59293	-0.47364	-0.43226	-0.40964	-0.49348	-0.71287	1.89646	0.35544	-0.84048
517	113.361307560602	23.2461602566394	741596.78245683	2572735.70695326	0		0.28224	-0.97282	-0.70349	1.22302	-0.62409	-1.12898	-0.99874	-0.32486	-0.46032	0.23176	0.9788	0.03126	-0.33418	-0.50554	1.39692	-0.33081	0.21623
518	113.419747245439	23.2362429161114	747596.78245683	2571735.70695326	0		-0.60647	0.42963	1.23309	2.75228	0.28486	0.8542	1.33731	-0.50982	-0.62608	-0.59371	-0.60864	0.03126	-0.49348	-0.4268	1.77229	1.01484	-0.73022
519	113.446910201299	23.1184642986223	750596.782456829	2558735.70695326	3	1.09861	0.23466	0.01918	-0.0635	-0.83627	-0.73066	0.8542	1.33731	-0.50982	-0.36086	-0.59371	-0.60864	-0.40964	-0.49348	-0.43464	-0.1555	-0.00473	-0.436
520	113.214937961083	23.257321774578	726596.78245683	2573735.70695326	5	1.60944	-0.5968	0.43652	-0.35101	1.58747	-0.95056	-1.12898	-0.99874	-0.41734	-0.52663	-0.0534	-0.43226	-0.40964	-0.01558	-0.02089	0.15244	-0.55157	0.28214
521	113.232974770113	23.1667817762386	728596.78245683	2563735.70695326	0		-0.42985	-0.50872	-0.42163	-1.07546	-0.52123	-1.12898	-0.99874	0.69245	0.43479	0.96717	0.44965	-0.40964	0.46232	-0.39979	-0.88002	-0.61469	-0.91733
522	113.455355327901	23.0461124484393	751596.78245683	2550735.70695326	7	1.94591	-0.60109	-0.76523	-0.00462	-0.17646	-0.12907	-1.11886	-0.77389	-0.32486	-0.46032	0.23176	0.09689	0.47216	-0.17488	-0.40391	1.22225	-0.69847	-0.86211
523	113.312158697754	23.2288355646765	736596.782456831	2570735.70695326	11	2.3979	0.51256	0.31829	-0.0567	0.58511	0.05152	-1.12898	-0.99874	-0.32486	-0.62608	-0.5787	-0.60864	-0.40964	-0.49348	0.90505	-0.45737	-0.19635	0.24532
524	113.195991644868	23.2937021367965	724596.78245683	2577735.70695326	0		0.30399	1.29979	0.35851	0.80976	-0.43798	-1.12898	-0.99874	-0.50982	-0.62608	-0.59371	-0.60864	-0.40964	-0.49348	0.70487	2.58936	2.13316	1.0283
525	113.291240881777	23.147888086796	734596.782456831	2561735.70695326	23	3.13549	-0.92255	-0.77645	-1.2385	-0.52956	-0.6213	1.03026	1.28127	0.87742	0.6337	0.00663	-0.60864	0.47216	0.46232	-0.46226	-0.68008	-0.59811	-0.64776
526	113.426422130359	23.0646147390512	748596.782456829	2552735.70695326	0		0.39882	-0.48286	-0.57768	-0.26667	1.80435	0.8542	1.33731	-0.50982	-0.59293	-0.59371	-0.60864	-0.40964	-0.33418	1.20276	-0.35204	0.44067	0.25689
527	113.183327803293	23.0756160728605	723663.697816531	2553561.30603013	1	0	0.39244	1.05727	1.11136	-0.88478	0.14973	0.36414	-0.68004	-0.50982	-0.55978	-0.59371	-0.60864	-0.40964	-0.49348	0.31786	-0.30181	-0.15641	0.00275
528	113.272786758956	23.2113535476557	732596.78245683	2568735.70695326	13	2.56495	-0.58545	-0.43875	-1.12054	-0.69886	-0.93237	-1.12898	-0.99874	0.87742	0.50109	1.82265	2.56624	0.47216	0.62162	-1.03944	-0.70902	-0.77958	-0.83614
529	113.260446642481	23.0580486571865	731596.782456829	2551735.70695326	5	1.60944	0.67948	-0.62522	0.47548	0.2659	-0.59257	0.36414	-0.68004	-0.32486	-0.52663	-0.20349	0.27327	0.03126	-0.49348	-0.75581	-0.86758	-0.70066	-0.47651
530	113.546187090889	23.2071629858198	760596.782456829	2568735.70695326	5	1.60944	-0.36383	1.11369	-0.26148	-0.10101	-0.38337	0.8542	1.33731	-0.41734	-0.39402	-0.36858	-0.25588	-0.40964	-0.33418	-0.71731	1.75741	-0.28595	0.14868
531	113.203828803277	23.1670335006894	725611.564387388	2563718.09971337	0		0.08016	-1.04239	-0.09156	-0.3018	-0.21567	-1.12898	-0.99874	-0.23238	-0.26141	-0.54868	-0.07949	-0.40964	-0.49348	-0.32955	-0.86765	-0.72024	-0.26746
532	113.301001526282	23.1477458175051	735596.782456831	2561735.70695326	61	4.11087	-0.47508	-0.47727	-1.28586	-0.77902	-0.89497	1.03026	1.28127	0.87742	1.36305	-0.00838	-0.25588	0.03126	-0.49348	-0.69034	-0.73481	-0.83796	-0.85027
533	113.283781865248	23.2834197254178	733596.782456831	2576735.70695326	0		0.15981	0.03433	-0.19426	0.54536	-0.51199	-1.12898	-0.99874	-0.41734	-0.55978	-0.36858	-0.60864	-0.40964	-0.49348	-0.34223	-0.0723	-0.60267	1.07001
534	113.322237598847	23.2467429708936	737596.782456831	2572735.70695326	0		0.41455	0.11686	-0.44599	-0.3915	-0.59784	-1.12898	-0.99874	-0.50982	-0.52663	-0.56369	-0.07949	-0.40964	-0.49348	0.43816	-0.73258	-0.34834	-0.22762
535	113.514202215116	23.0632419399169	757596.782456831	2552735.70695326	0		-1.28543	-0.74919	-0.50595	-0.40566	-0.68514	0.8542	1.33731	0.32252	0.00381	-0.44362	-0.60864	-0.40964	-0.33418	-0.48842	-0.4432	-0.6719	-0.91077
536	113.224407513514	23.2391309725543	727596.78245683	2571735.70695326	0		-1.16094	-0.65564	0.60313	1.43732	-0.86431	-1.12898	-0.99874	-0.50982	-0.32771	0.24676	0.80242	0.91306	0.14372	-0.37799	-0.6377	-0.70549	-0.51975
537	113.44822255301	23.1906642184885	750596.782456829	2566735.70695326	29	3.3673	-0.86683	0.25887	0.34618	-0.82579	-0.12404	0.8542	1.33731	-0.23238	0.10327	-0.2335	-0.43226	-0.40964	-0.17488	-0.67036	-0.46692	-0.57786	-0.46894
538	113.331377847891	23.2104955194201	738596.782456831	2568735.70695326	17	2.83321	-0.04066	-0.74995	-0.35481	-0.42753	-0.65034	-1.12898	-0.99874	0.50749	0.36848	0.06666	0.44965	0.03126	0.30302	-0.16638	-0.22982	-0.71352	-0.88611
539	113.283012705317	23.2382900173723	733596.782456831	2571735.70695326	1	0	-0.35349	-0.57828	-0.54288	-0.66352	-0.83677	-1.12898	-0.99874	0.78494	1.09783	5.75485	2.38985	-0.40964	3.17043	-0.90259	-0.73109	-0.86208	-1.01932
540	113.3894846361	23.1825397092906	744596.78245683	2565735.70695326	0		-1.04435	-0.06722	-0.64127	-0.42345	0.03472	0.96955	0.68404	-0.50982	-0.62608	-0.59371	-0.60864	-0.40964	-0.49348	1.58346	-0.33378	0.10037	0.19121
541	113.347294680972	23.0026136186006	740596.78245683	2545735.70695326	2	0.693147	0.52938	0.57307	0.73437	-0.72526	0.20035	-1.11886	-0.77389	0.32252	1.09783	1.5525	2.21347	-0.40964	2.53322	-0.69629	-0.97408	-0.64211	-0.97111
542	113.176300818955	23.2849481035871	722596.78245683	2576735.70695326	0		-0.59186	2.34846	1.09275	2.65979	1.66524	-1.12898	-0.99874	-0.50982	-0.62608	-0.59371	-0.60864	-0.40964	-0.49348	0.77662	2.65014	3.85007	2.99676
543	113.309834525185	23.0934473553457	736596.782456831	2555735.70695326	5	1.60944	-0.63919	0.30637	-1.16892	-1.14185	-0.74625	0.96273	-0.43373	1.33983	1.19729	2.54305	2.21347	3.11756	1.09952	-0.80121	-0.96881	-0.76021	-0.83099
544	113.215236504368	23.2753744945881	726596.78245683	2575735.70695326	3	1.09861	0.23489	-0.61692	-1.21684	0.73329	-0.43192	-1.12898	-0.99874	-0.23238	-0.39402	0.14171	-0.07949	-0.40964	0.30302	-0.46768	1.26506	-0.72592	-0.48235
545	113.389805536155	23.2005903790192	744596.78245683	2567735.70695326	6	1.79176	0.78488	-0.27866	-1.15727	-0.24794	-0.4583	0.96955	0.68404	-0.13989	-0.09565	0.42687	-0.25588	0.03126	-0.49348	-0.47629	-0.50998	-0.60333	-0.4503
546	113.252853036229	22.9859689139313	730941.319810041	2543740.15355196	0		0.34865	-0.34248	2.27486	0.40937	0.11461	-1.11886	-0.77389	-0.50982	-0.62608	-0.59371	-0.60864	-0.40964	-0.49348	0.68047	-0.8088	-0.54018	0.08414
547	113.329659089028	23.1112122064145	738596.782456831	2557735.70695326	6	1.79176	-0.63087	-0.61783	-0.404	-0.39171	0.26503	0.96273	-0.43373	0.04507	0.23588	0.06666	-0.07949	0.03126	1.09952	-0.47383	-0.75156	-0.79771	-0.72789
548	113.347138544895	22.9935877851137	740596.78245683	2544735.70695326	3	1.09861	-0.9725	-0.25167	0.02986	-0.71126	-0.44002	-1.11886	-0.77389	0.415	0.70001	1.79263	1.15518	0.47216	0.78092	-0.09684	-0.52863	-0.86605	-0.62663
549	113.186355285634	23.3028538432665	723595.578376684	2578734.42985762	0		-0.35492	2.04546	1.35106	1.58562	0.57626	-1.12898	-0.99874	-0.50982	-0.62608	-0.5787	-0.60864	0.03126	-0.49348	-0.42453	3.31431	0.87439	0.68937
550	113.448551465392	23.2087140840643	750596.782456829	2568735.70695326	0		1.77194	1.44513	1.61433	0.31549	0.93251	0.8542	1.33731	-0.50982	-0.62608	-0.59371	-0.60864	-0.40964	-0.49348	1.84554	0.42654	0.71327	2.04278
551	113.428697043776	23.1909669143636	748596.782456829	2566735.70695326	6	1.79176	-1.17621	-0.24149	0.3619	-0.6735	-0.2112	0.8542	1.33731	-0.23238	-0.02934	-0.2335	-0.60864	-0.40964	-0.33418	-0.55648	-0.79816	-0.48479	-0.54637
552	113.456174886425	23.0912376110175	751596.78245683	2555735.70695326	0		-0.85551	-0.16481	-0.41811	-0.59847	-0.66316	0.8542	1.33731	-0.13989	-0.1288	-0.47364	-0.60864	0.03126	-0.49348	-0.12882	-0.83367	-0.01304	-0.58523
553	113.302547156484	23.2380048484959	735596.782456831	2571735.70695326	4	1.38629	-0.15701	-0.25745	-0.38136	-0.03301	-0.57731	-1.12898	-0.99874	0.78494	0.33533	-0.0534	0.80242	-0.40964	0.14372	-0.34762	-0.32078	-0.94694	-0.09581
554	113.350749632898	23.2011790936043	740596.78245683	2567735.70695326	0		0.69023	-0.17967	-0.77446	0.2776	0.37487	0.96955	0.68404	-0.50982	-0.62608	-0.59371	-0.60864	-0.40964	-0.49348	1.2829	0.00409	-0.03784	0.53326
555	113.486605293259	23.1539527651834	754596.782456831	2562735.70695326	0		-1.08122	0.06672	0.94159	-0.59461	-0.00087	0.8542	1.33731	-0.32486	-0.32771	-0.08342	-0.07949	-0.40964	-0.49348	-0.83837	0.20804	-0.7693	-0.99807
556	113.361466566008	23.2551857092925	741596.78245683	2573735.70695326	1	0	-0.78609	-0.58015	-1.08139	1.46991	-0.4743	-1.12898	-0.99874	-0.41734	-0.16195	0.23176	0.9788	-0.40964	0.30302	0.18451	1.39145	-0.85003	-0.40059
557	113.357986818016	23.0566231248472	741596.78245683	2551735.70695326	5	1.60944	-0.87456	-0.85363	-0.18631	-0.1509	-0.39973	0.96273	-0.43373	-0.50982	-0.09565	-0.17347	0.27327	1.35396	0.30302	-0.57117	0.14846	-0.92917	-0.49804
558	113.179067583167	23.2372281206526	722959.291247704	2571454.55137325	0		-0.58904	2.69344	1.78937	3.65557	0.27348	-1.12898	-0.99874	-0.50982	-0.62608	-0.59371	-0.60864	-0.40964	-0.49348	4.04582	0.30588	1.20255	1.56849
559	113.260406643418	23.0122058313036	731671.107591144	2546658.07380036	0		-0.28796	-0.51401	1.01848	1.37614	1.23374	-1.11886	-0.77389	-0.50982	-0.62608	-0.59371	-0.60864	-0.40964	-0.49348	0.23708	-0.81463	0.35077	1.16175
560	113.347450895772	23.0116394408022	740596.78245683	2546735.70695326	7	1.94591	-0.80481	0.62279	1.22096	-0.82981	-0.69861	-1.11886	-0.77389	0.32252	1.52881	3.54861	1.68433	0.47216	2.05532	-0.93083	-0.65073	-0.7116	-0.65256
561	113.526830458596	23.2165024256479	758596.782456831	2569735.70695326	0		-0.08335	0.61068	1.14195	1.71398	0.72587	0.8542	1.33731	-0.50982	-0.46032	-0.59371	-0.60864	-0.40964	-0.49348	0.01973	0.95355	-0.18392	-0.46846
562	113.211618334885	23.049793876331	726606.092704961	2550744.88946581	3	1.09861	0.70804	-0.04087	0.33405	-0.56458	-0.39999	0.36414	-0.68004	-0.50982	-0.39402	-0.2185	-0.25588	-0.40964	-0.49348	-0.26043	-0.07404	0.1419	-0.39026
563	113.361148634883	23.2371347925936	741596.78245683	2571735.70695326	0		-0.42426	-0.24347	-0.4056	0.78675	0.05446	-1.12898	-0.99874	-0.50982	-0.62608	-0.59371	-0.60864	-0.40964	-0.49348	0.43747	1.52516	0.02751	0.88693
564	113.458480639473	23.2175865466706	751596.78245683	2569735.70695326	0		3.15194	2.9008	1.42781	1.15538	-0.4002	0.8542	1.33731	-0.50982	-0.62608	-0.56369	-0.60864	-0.40964	-0.49348	-0.12718	0.64088	0.73265	3.68651
565	113.390287490434	23.2276662981075	744596.78245683	2570735.70695326	0		-0.90016	-0.02066	-0.99656	1.63191	-0.13516	0.96955	0.68404	-0.50982	-0.62608	-0.59371	-0.60864	-0.40964	-0.49348	1.78332	1.07395	0.2051	1.26535
566	113.292009460089	23.1930180528531	734596.782456831	2566735.70695326	0		-0.67968	-0.24885	-1.02941	-0.50468	0.79817	-1.12898	-0.99874	-0.50982	-0.39402	-0.56369	-0.60864	-0.40964	-0.49348	0.09988	-0.35735	-0.16807	-0.25511
567	113.221873383874	23.0856816670673	727596.78245683	2554735.70695326	0		-0.32053	-0.71813	-0.18097	-0.34576	-0.13737	0.36414	-0.68004	0.415	0.33533	-0.32356	0.27327	0.03126	0.94022	-0.57694	-0.37045	-0.63911	-0.69044
568	113.486105708014	23.126878540188	754596.782456831	2559735.70695326	0		1.45858	0.73354	0.58717	1.14111	0.8692	0.8542	1.33731	-0.50982	-0.62608	-0.59371	-0.60864	-0.40964	-0.49348	2.60827	0.63756	2.42297	0.97696
569	113.293397769566	23.2742512786849	734596.782456831	2575735.70695326	3	1.09861	-0.11069	-0.64166	-1.15795	-0.63579	-0.80902	-1.12898	-0.99874	-0.13989	-0.09565	-0.09843	0.27327	0.47216	-0.01558	-0.7379	-0.1164	-0.62432	-0.58321
570	113.330908153509	23.1834183882731	738596.782456831	2565735.70695326	2	0.693147	-0.64403	-1.06533	-1.20381	-0.71102	-0.81007	-1.12898	-0.99874	1.06238	2.45707	2.42298	0.80242	1.35396	0.30302	-0.59048	-0.76884	-0.78638	-0.98293
571	113.41602393215	23.0286629755603	747596.78245683	2548735.70695326	0		-0.99143	-1.05755	-0.57715	-0.1091	-0.52082	-1.11886	-0.77389	-0.32486	-0.55978	-0.56369	-0.60864	-0.40964	-0.49348	-0.73733	-1.04129	-0.07254	-0.09475
572	113.45699650874	23.1363624882424	751596.78245683	2560735.70695326	1	0	-0.68193	-0.42785	-0.03138	-0.31811	-0.15489	0.8542	1.33731	-0.32486	-0.16195	-0.11344	0.62603	-0.40964	-0.49348	-0.95203	-0.82967	-0.59657	-0.58295
573	113.41942176903	23.2181927260789	747596.78245683	2569735.70695326	0		-0.88945	-0.09367	1.12035	1.2033	2.56108	0.8542	1.33731	-0.50982	-0.62608	-0.59371	-0.60864	-0.40964	-0.49348	0.34144	0.68368	-0.14161	1.64035
574	113.225994865679	23.3097846299881	727639.056848894	2579563.89848656	0		2.34713	0.12634	1.03824	-0.08787	-0.3331	-1.12898	-0.99874	-0.50982	-0.62608	-0.5787	-0.60864	-0.40964	-0.49348	-0.29152	2.10223	-0.71575	0.15128
575	113.243339424881	23.2027481343227	729596.782456829	2567735.70695326	0		-0.30677	-0.79714	-0.33543	-0.16181	-0.84575	-1.12898	-0.99874	-0.13989	0.66685	0.57695	1.33156	0.03126	0.78092	-1.01366	-0.99685	-0.93558	-0.98519
576	113.339886580306	23.1381449887231	739596.782456831	2560735.70695326	97	4.57471	-0.09815	-0.85031	-1.25496	-1.06654	-0.81662	0.96955	0.68404	4.29928	6.23643	3.11337	4.68282	3.11756	3.96693	-0.80037	-0.89014	-0.89807	-0.9032
577	113.262413523948	23.1753898377632	731596.782456829	2564735.70695326	10	2.30259	0.24421	-0.3581	-0.61071	-0.8924	0.05374	-1.12898	-0.99874	1.43231	2.49023	0.93715	0.44965	-0.40964	0.46232	-0.79788	-0.77711	-0.66685	-0.97953
578	113.322863590639	23.2828457222885	737596.782456831	2576735.70695326	0		0.24965	-0.40019	0.4257	0.16184	-0.83051	-1.12898	-0.99874	-0.41734	-0.39402	-0.32356	-0.60864	-0.40964	-0.49348	-0.17592	-0.74333	-0.08196	0.0069
579	113.278717234886	22.97053234753	733620.207140732	2542071.3692769	0		1.28112	0.28193	2.16033	-0.14864	-0.25339	-1.11886	-0.77389	-0.50982	-0.62608	-0.59371	-0.60864	-0.40964	-0.49348	0.31018	0.09277	-0.75516	0.74617
580	113.555950186821	23.2070045484366	761596.78245683	2568735.70695326	9	2.19722	0.13322	0.07898	-0.92215	-0.92735	-0.13076	0.8542	1.33731	0.04507	-0.49347	0.14171	0.80242	-0.40964	-0.01558	-0.5441	2.02737	-0.88641	-0.30173
581	113.232675406437	23.1487290253613	728596.78245683	2561735.70695326	1	0	-0.41669	-0.63243	-0.1863	-0.54736	-0.42059	0.36414	-0.68004	-0.23238	0.07011	0.80208	0.62603	1.35396	-0.01558	-0.80618	-0.60073	-0.83679	-0.99024
582	113.357672381604	23.0385717086436	741596.78245683	2549735.70695326	0		-1.12379	0.1322	-0.64649	0.28126	0.19447	-1.11886	-0.77389	-0.50982	-0.55978	-0.5787	-0.60864	0.47216	-0.49348	0.93324	0.00999	0.35111	0.28783
583	113.443788832243	23.0128088198798	750472.669370425	2547026.7902829	0		1.08805	-0.2892	0.72011	-0.60589	-0.13423	-1.11886	-0.77389	-0.50982	-0.59293	-0.59371	-0.60864	-0.40964	-0.49348	-0.13177	0.77621	0.94786	-0.32904
584	113.381085940251	23.2716963887435	743574.761678613	2575597.42028961	0		2.82484	2.2332	0.41861	-0.5385	1.65794	-1.12898	-0.99874	-0.50982	-0.62608	-0.59371	-0.60864	-0.40964	-0.49348	1.87321	1.46892	1.71393	1.87969
585	113.309988925619	23.102473315132	736596.782456831	2556735.70695326	3	1.09861	-0.56515	-0.28232	-1.12063	-0.91557	-0.85347	1.03026	1.28127	4.02183	3.71686	0.95216	2.21347	0.47216	0.94022	-0.93507	-0.64367	-0.85249	-1.11852
586	113.348703450982	23.0838456117002	740596.78245683	2554735.70695326	6	1.79176	-0.40729	-0.89624	-1.03355	-0.89497	-0.82663	0.96273	-0.43373	-0.04741	0.23588	-0.35357	0.44965	0.03126	-0.01558	-0.53836	-0.72156	-0.86312	-0.38034
587	113.409981012513	23.2363930773256	746596.78245683	2571735.70695326	0		0.03775	1.13647	0.58516	2.58458	0.22205	0.96955	0.68404	-0.50982	-0.62608	-0.56369	-0.60864	-0.40964	-0.49348	0.62649	1.70655	1.51427	-0.17604
588	113.555778492907	23.1979803621687	761596.78245683	2567735.70695326	2	0.693147	-0.58653	-0.04248	-0.78595	-0.42236	-0.55428	0.8542	1.33731	0.50749	0.07011	0.77206	0.80242	-0.40964	-0.01558	-0.86249	2.37216	-0.47295	-0.48198
589	113.290780660559	23.1208099715861	734596.782456831	2558735.70695326	6	1.79176	-1.05935	-1.04307	-1.10017	-1.09177	0.66146	1.03026	1.28127	5.779	4.11469	1.17729	1.33156	7.08565	2.85183	-1.04119	-0.79507	-0.71018	-0.9689
590	113.222765312405	23.1398406164853	727596.78245683	2560735.70695326	3	1.09861	0.29958	-1.06586	-0.95741	-0.96015	-0.89193	0.36414	-0.68004	0.23004	-0.02934	0.00663	-0.07949	-0.40964	-0.17488	-0.95098	-0.7258	-0.53375	-0.34889
591	113.405952251496	23.0107607998932	746596.78245683	2546735.70695326	4	1.38629	0.75665	0.06279	-1.17516	0.1235	-0.32854	-1.11886	-0.77389	-0.50982	-0.55978	-0.5787	-0.60864	0.03126	-0.49348	-0.23683	-0.02318	-0.03129	-0.47835
592	113.371074852647	23.2460130620517	742596.78245683	2572735.70695326	0		1.01718	0.08157	-0.64427	1.68631	0.26369	-1.12898	-0.99874	-0.50982	-0.62608	-0.5787	-0.60864	-0.40964	-0.49348	0.27558	1.95101	0.35918	1.26982
593	113.204427006542	23.212327029297	725596.78245683	2568735.70695326	0		-0.37615	-0.69154	-0.62592	0.5015	-0.35814	-1.12898	-0.99874	-0.50982	-0.49347	-0.48865	-0.07949	-0.40964	-0.49348	-0.82296	-0.29792	-0.47827	0.4879
594	113.206097630051	23.113498755477	725933.674953523	2557792.1751951	0		-0.22873	-0.40108	-0.9691	-0.9466	-0.30847	0.36414	-0.68004	0.13756	0.20272	-0.35357	-0.43226	-0.40964	-0.17488	-0.76947	-0.95107	-0.53815	-0.49306
595	113.504616364272	23.0724215757877	756596.782456831	2553735.70695326	0		0.39017	-0.15238	0.44047	0.76746	-0.37869	0.8542	1.33731	-0.50982	-0.62608	-0.59371	-0.60864	-0.40964	-0.49348	1.09017	-0.28398	0.66214	0.54928
596	113.507302359892	23.216815201088	756596.782456831	2569735.70695326	0		0.14417	1.67751	-0.03146	2.10905	3.10069	0.8542	1.33731	-0.13989	-0.55978	-0.59371	-0.43226	-0.40964	-0.49348	-0.52919	-0.03398	0.36985	0.28192
597	113.379562412622	23.1736622510109	743596.78245683	2564735.70695326	0		0.05277	-0.59106	-0.32963	0.19898	-0.16173	0.96955	0.68404	-0.32486	-0.32771	-0.54868	-0.25588	-0.40964	-0.49348	0.30033	-0.0115	-0.13796	-0.19028
598	113.485773069382	23.108828999577	754596.782456831	2557735.70695326	1	0	-0.53241	0.19113	-0.56942	0.17971	-0.62508	0.8542	1.33731	-0.41734	-0.46032	-0.50366	-0.60864	-0.40964	-0.49348	-0.16554	-0.3887	0.23791	1.02056
599	113.388044567994	23.101311132033	744596.78245683	2556735.70695326	18	2.89037	-0.6338	-0.30521	-0.23933	-0.67762	-0.37482	0.96273	-0.43373	-0.23238	0.26903	0.69702	0.80242	-0.40964	0.46232	-0.25829	-0.84133	-0.4787	-0.66749
600	113.400053230161	23.2275174134538	745596.78245683	2570735.70695326	0		0.41364	0.53215	-0.32725	2.17051	-0.03258	0.96955	0.68404	-0.50982	-0.62608	-0.59371	-0.60864	-0.40964	-0.49348	3.11454	1.05317	0.86509	1.57195
601	113.250531979768	23.0491728445339	730595.727403535	2550736.9452425	0		-0.10167	-0.60081	1.00991	-0.2248	-0.32052	0.36414	-0.68004	-0.23238	-0.1951	-0.18848	-0.60864	-0.40964	-0.49348	0.34542	-0.91233	0.09537	-0.42913
602	113.525982226456	23.1713804108318	758596.782456831	2564735.70695326	0		-0.17261	0.31098	2.01487	-0.6658	0.21297	0.8542	1.33731	-0.41734	-0.62608	-0.59371	-0.60864	-0.40964	-0.49348	0.35857	0.29509	1.30531	0.78466
603	113.342281732522	23.2898515242754	739571.204001574	2577543.71612627	0		-0.27227	0.48168	0.85085	0.12016	-0.22073	-1.12898	-0.99874	-0.50982	-0.55978	-0.5787	-0.43226	-0.40964	-0.49348	0.24482	-0.52014	-0.26959	-0.0418
604	113.506797090351	23.1897416203219	756596.782456831	2566735.70695326	0		1.25077	0.0739	0.01241	0.06033	1.27269	0.8542	1.33731	-0.50982	-0.59293	-0.5787	-0.60864	-0.40964	-0.49348	1.38503	-0.00656	0.69353	0.84805
605	113.272023949616	23.1662230803747	732596.78245683	2563735.70695326	4	1.38629	-0.9306	-0.82969	-0.97112	-0.94167	-0.76592	-1.12898	-0.99874	3.00452	3.51795	1.74761	0.27327	0.03126	1.57742	-0.81175	-0.87176	-0.54542	-0.72987
606	113.284075138018	23.2997023641672	733598.346581717	2578539.72162196	0		0.2359	0.12582	-0.06885	0.15839	0.44461	-1.12898	-0.99874	-0.50982	-0.59293	-0.59371	-0.60864	-0.40964	-0.49348	0.63659	0.06635	1.21164	1.17298
607	113.478898781372	23.243984696791	753637.307362055	2572695.48824025	0		3.76046	5.63605	-0.43441	1.02751	3.95185	-1.12898	-0.99874	-0.50982	-0.62608	-0.59371	-0.60864	-0.40964	-0.49348	-0.61643	1.04268	1.07399	2.3482
608	113.289099111932	23.0215226809832	734596.782456831	2547735.70695326	28	3.3322	0.70414	0.03708	-0.68166	-0.44849	-0.10955	-1.11886	-0.77389	-0.41734	-0.62608	-0.59371	-0.60864	-0.40964	-0.49348	0.95579	-0.53059	0.10977	-0.15823
609	113.223809300171	23.2030255461467	727596.78245683	2567735.70695326	0		-0.91676	-0.74032	-0.71678	-0.83658	-0.38128	-1.12898	-0.99874	-0.04741	0.86577	0.53192	0.27327	0.03126	-0.17488	-0.90512	-0.57694	-0.73135	-0.70792
610	113.425613535923	23.0194884211939	748596.782456829	2547735.70695326	0		-0.11639	-0.4923	-0.61373	0.61872	-0.04249	-1.11886	-0.77389	-0.50982	-0.62608	-0.56369	-0.60864	-0.40964	-0.49348	-0.32931	-0.30417	0.99913	0.77006
611	113.202216098478	23.0826312677947	725587.595109105	2554367.3429491	6	1.79176	0.55346	-0.87208	0.04468	0.27941	0.35935	0.36414	-0.68004	-0.50982	-0.59293	-0.56369	-0.60864	-0.40964	-0.49348	-0.61017	0.09276	-0.46787	0.18946
612	113.57668330479	23.1649874572482	763802.240332307	2564118.54463224	0		-0.22161	0.17699	1.85952	0.8108	1.5349	0.8542	1.33731	-0.50982	-0.62608	-0.59371	-0.60864	-0.40964	-0.49348	1.09602	1.50939	0.19621	0.05079
613	113.290015166156	23.0756795539258	734596.782456831	2553735.70695326	6	1.79176	-0.74713	-0.23204	-0.21407	-1.09979	-1.05042	0.96273	-0.43373	0.13756	2.1587	2.91826	2.74262	0.03126	4.12623	-0.63274	-0.7088	-0.67866	-0.69201
614	113.445903419447	23.2607330099964	750228.552691077	2574493.43195879	0		-0.6373	3.37502	-0.59075	-0.12355	1.4237	-1.12898	-0.99874	-0.50982	-0.62608	-0.56369	-0.60864	-0.40964	-0.49348	-0.65408	2.87921	0.16962	0.21152
615	113.302082652721	23.2109272581029	735596.782456831	2568735.70695326	2	0.693147	-0.84575	-0.55538	-0.53211	-0.55045	-0.53095	-1.12898	-0.99874	1.06238	0.13642	0.00663	0.44965	-0.40964	-0.17488	0.29026	-0.47187	-0.60585	-0.19216
616	113.235229599511	23.3021759707658	728596.78245683	2578735.70695326	2	0.693147	0.9337	-0.83404	0.5055	0.18378	-0.41958	-1.12898	-0.99874	-0.32486	-0.42717	-0.09843	0.09689	-0.40964	-0.33418	-0.14379	1.7264	-0.5075	-0.77779
617	113.536764937033	23.225369430287	759596.782456829	2570735.70695326	0		0.63276	1.64604	1.07306	1.40269	1.1489	0.8542	1.33731	-0.50982	-0.62608	-0.59371	-0.60864	-0.40964	-0.49348	3.13782	0.51275	0.33534	1.26599
618	113.504950933728	23.0904709395624	756596.782456831	2555735.70695326	4	1.38629	-1.09524	-0.38939	0.63548	1.39337	-0.24789	0.8542	1.33731	-0.50982	-0.55978	-0.5787	-0.60864	-0.40964	-0.49348	0.18844	-0.70034	0.11113	-0.81329
619	113.355717539511	22.986177967738	741489.717959454	2543929.06975557	7	1.94591	-0.96589	-0.17824	-0.22575	-0.73548	-0.18995	-1.11886	-0.77389	-0.50982	-0.36086	-0.51866	-0.25588	-0.40964	-0.49348	-0.07193	0.09901	-0.03898	-0.47044
620	113.547516959652	23.2413666131264	760666.476412322	2572527.13052172	0		0.2393	1.46639	1.73649	1.57799	2.89245	0.8542	1.33731	-0.50982	-0.62608	-0.59371	-0.60864	-0.40964	-0.49348	4.4905	0.20699	3.19525	2.75538
621	113.477343903889	23.1811808888549	753596.782456831	2565735.70695326	0		-1.07028	-0.87047	-0.05795	-0.48525	-0.59375	0.8542	1.33731	-0.32486	0.86577	-0.42861	-0.60864	0.47216	-0.33418	-0.48747	-0.70002	-0.73096	-0.67045
622	113.330126899949	23.138289609561	738596.782456831	2560735.70695326	32	3.46574	-0.71946	-1.00454	-1.09842	-1.10257	-0.84887	0.96955	0.68404	1.98721	2.8549	1.64255	2.21347	1.35396	2.37392	-0.29339	-0.87687	-0.57765	-1.03066
623	113.409009489767	23.1822419801299	746596.78245683	2565735.70695326	2	0.693147	0.77158	-0.56977	-0.94492	-0.81305	-0.60922	0.96955	0.68404	-0.50982	-0.39402	-0.54868	-0.60864	0.03126	-0.49348	-0.84814	-0.53762	0.40834	-0.95616
624	113.225156969263	23.2842625018177	727596.78245683	2576735.70695326	2	0.693147	0.19613	0.31889	-0.61034	-0.05257	-0.30057	-1.12898	-0.99874	-0.50982	-0.36086	-0.17347	-0.43226	-0.40964	-0.33418	-0.43416	1.85225	-0.04908	-0.07642
625	113.360513728391	23.2010328225558	741596.78245683	2567735.70695326	0		-0.92085	-0.26484	-1.11698	-0.30885	-0.68055	0.96955	0.68404	0.23004	0.16957	0.51692	-0.07949	-0.40964	1.57742	0.07958	-0.38666	-0.77291	-0.44651
626	113.389966106998	23.2096156967863	744596.78245683	2568735.70695326	0		-0.69819	0.03669	-0.64906	0.51853	-0.12279	0.96955	0.68404	-0.41734	-0.49347	-0.33856	-0.25588	-0.40964	-0.33418	-0.08747	-0.00887	-0.55803	-0.4512
627	113.466920364278	23.1452349012046	752596.782456831	2561735.70695326	2	0.693147	-0.90229	-0.38971	0.65463	-0.54123	-0.42565	0.8542	1.33731	-0.50982	-0.52663	-0.5787	-0.60864	-0.40964	-0.49348	0.79517	-0.64501	-0.07386	-0.09491
628	113.245052416115	23.3109516242168	729586.639204181	2579723.27371554	6	1.79176	2.53063	-0.14819	1.23096	0.14391	-0.09677	-1.12898	-0.99874	-0.50982	-0.55978	-0.59371	-0.60864	-0.40964	-0.49348	1.38215	1.02414	1.2264	0.18789
629	113.271263053339	23.121092330922	732596.78245683	2558735.70695326	18	2.89037	-1.25876	-0.71774	-0.89879	-1.07	-0.11154	1.03026	1.28127	6.79631	4.28045	5.13951	5.56473	14.1401	6.83433	-0.81728	-0.94474	-0.94935	-0.95599
630	113.466259964513	23.1091353328714	752596.782456831	2557735.70695326	19	2.94444	-0.51979	-0.94242	-0.81434	-0.74918	0.21051	0.8542	1.33731	0.13756	0.26903	-0.0384	0.62603	-0.40964	1.41812	-0.79262	-0.73128	-0.61794	-0.41868
631	113.407718670107	23.1100398784474	746596.78245683	2557735.70695326	0		-0.96317	-0.89597	-0.01875	-0.71924	-0.6962	0.96955	0.68404	1.06238	0.73316	0.95216	0.62603	0.91306	0.94022	-0.82302	-0.71496	-0.94559	-0.64653
632	113.205168776919	23.257459324099	725596.78245683	2573735.70695326	0		0.70265	0.33595	-0.23098	2.21245	0.42988	-1.12898	-0.99874	-0.50982	-0.62608	-0.59371	-0.60864	-0.40964	-0.49348	1.24276	0.31942	0.23679	0.53919
633	113.310916960139	23.1566288365616	736596.782456831	2562735.70695326	8	2.07944	-0.82044	-0.54849	-0.69399	-0.93142	-0.51531	1.03026	1.28127	1.15487	0.53425	0.62197	0.44965	0.03126	-0.01558	-0.43222	-0.77726	-0.85592	-0.61676
634	113.321925073275	23.2286915270223	737596.782456831	2570735.70695326	0		0.73351	1.18919	0.44374	0.24867	1.1412	-1.12898	-0.99874	-0.23238	-0.62608	-0.59371	-0.60864	-0.40964	-0.49348	2.14399	-0.04479	0.01567	1.2284
635	113.546529428017	23.2252114610376	760596.782456829	2570735.70695326	0		1.56612	0.50396	0.61341	0.85678	1.36367	0.8542	1.33731	-0.50982	-0.62608	-0.59371	-0.60864	-0.40964	-0.49348	2.17264	0.79626	1.62841	1.01872
636	113.330439165952	23.156341155044	738596.782456831	2562735.70695326	40	3.68888	-0.34411	-0.7614	-1.25193	-0.84644	-0.09836	0.96955	0.68404	2.17218	1.82718	0.90713	0.80242	0.03126	0.14372	-0.77	-0.79349	-0.76659	-0.87883
637	113.351698538043	23.2553323609452	740596.78245683	2573735.70695326	1	0	-0.10796	-0.55229	-1.07041	0.69075	-0.70636	-1.12898	-0.99874	-0.13989	-0.1951	0.39685	0.44965	-0.40964	0.78092	0.03266	0.83778	-0.41547	-0.61143
638	113.251443922474	23.1033196566315	730596.782456829	2556735.70695326	16	2.77259	-1.05416	-0.45168	-0.79349	-0.93059	-0.71662	0.36414	-0.68004	2.81956	1.09783	0.26177	-0.43226	2.23576	0.30302	-0.88336	-0.98141	-0.85986	-0.90251
639	113.369006524306	23.1286819697223	742596.78245683	2559735.70695326	32	3.46574	-1.04731	-0.87517	-1.1876	-0.71177	-0.57157	0.96955	0.68404	1.33983	1.46251	1.22231	-0.07949	0.47216	0.46232	-0.50903	-0.66572	-0.63345	-0.65135
640	113.310762093328	23.1476029445902	736596.782456831	2561735.70695326	29	3.3673	-0.81944	-0.69216	-1.10407	-1.05106	-0.71229	1.03026	1.28127	2.72707	3.18642	1.23732	0.62603	5.32206	2.69253	-0.56002	-0.8613	-0.80621	-0.98277
641	113.281939116202	23.175107950607	733596.782456831	2564735.70695326	3	1.09861	-0.47803	-0.41893	-0.19424	-0.64734	0.61659	-1.12898	-0.99874	-0.50982	-0.59293	-0.59371	-0.60864	-0.40964	-0.49348	0.19281	-0.71451	0.42385	-0.24236
642	113.242286287171	23.1395640461162	729596.782456829	2560735.70695326	6	1.79176	-1.04153	-0.7692	-0.3259	-0.71194	-0.33035	0.36414	-0.68004	2.35714	1.82718	0.78707	0.80242	0.03126	1.25882	-0.71741	-1.02708	-0.7304	-1.01789
643	113.381002382477	23.2548905860508	743596.78245683	2573735.70695326	0		2.43504	1.48976	-0.25391	0.56381	1.8564	-1.12898	-0.99874	-0.50982	-0.62608	-0.59371	-0.60864	-0.40964	-0.49348	3.31931	2.22342	1.3694	2.12306
644	113.416507143161	23.0557389615714	747596.78245683	2551735.70695326	2	0.693147	-1.04063	0.46665	-1.21788	-1.08938	0.20472	-1.11886	-0.77389	-0.50982	-0.49347	-0.41361	-0.43226	0.03126	-0.49348	-0.60203	-0.14718	-0.61965	0.41745
645	113.465765535517	23.0820605365917	752596.782456831	2554735.70695326	0		0.3574	0.24287	0.31896	0.56178	1.03701	0.8542	1.33731	-0.50982	-0.62608	-0.59371	-0.60864	-0.40964	-0.49348	2.71407	-0.17916	1.02961	0.36315
646	113.390770170325	23.2547421145019	744596.78245683	2573735.70695326	0		3.29289	2.12141	0.45239	0.44655	1.91553	-1.12898	-0.99874	-0.50982	-0.62608	-0.59371	-0.60864	-0.40964	-0.49348	3.90911	2.58919	2.60029	2.15111
647	113.243942881203	23.2388530795548	729596.782456829	2571735.70695326	0		-1.17854	-0.95925	-0.47203	-0.12419	-0.70493	-1.12898	-0.99874	-0.32486	-0.22826	1.11725	2.21347	-0.40964	-0.01558	-0.99787	0.0721	-0.96329	-0.7846
648	113.475520178465	23.0819078704177	753596.782456831	2554735.70695326	0		0.98546	0.37356	0.05197	0.98168	1.35266	0.8542	1.33731	-0.50982	-0.62608	-0.59371	-0.60864	-0.40964	-0.49348	1.95416	-0.31235	0.97669	0.35366
649	113.409494885598	23.2093175801173	746596.78245683	2568735.70695326	0		-0.71758	0.36816	0.42034	0.69144	1.329	0.96955	0.68404	-0.50982	-0.62608	-0.59371	-0.60864	-0.40964	-0.49348	1.38157	0.06091	1.54243	1.2853
650	113.224108256808	23.2210782818889	727596.78245683	2569735.70695326	4	1.38629	-0.33074	-0.39993	-0.61345	0.70257	-0.42872	-1.12898	-0.99874	-0.04741	-0.29456	0.21675	0.80242	-0.40964	-0.33418	-0.27079	-0.84657	-0.68239	-0.16969
651	113.399247103349	23.1823911469472	745596.78245683	2565735.70695326	0		0.49716	-0.14016	-0.84222	-0.59177	-0.09722	0.96955	0.68404	-0.50982	-0.62608	-0.59371	-0.60864	-0.40964	-0.49348	1.0478	-0.39243	0.05921	-0.01556
652	113.439620001547	23.2539899823146	749598.023108741	2573735.65292148	0		0.05053	2.94335	-0.07663	0.49219	0.0561	-1.12898	-0.99874	-0.50982	-0.62608	-0.5787	-0.60864	-0.40964	-0.49348	0.0647	2.82247	1.38375	1.24616
653	113.151215268634	23.299107010414	720006.845048914	2578265.58192432	0		0.91121	1.11035	3.21116	4.11754	2.19653	-1.12898	-0.99874	-0.50982	-0.62608	-0.59371	-0.60864	-0.40964	-0.49348	2.0472	3.79976	5.37511	4.68919
654	113.328259884602	23.0299793864592	738596.782456831	2548735.70695326	3	1.09861	-0.16939	-0.04933	1.45975	-0.83026	-0.45454	-1.11886	-0.77389	0.13756	-0.16195	-0.32356	0.62603	0.03126	0.30302	-0.68904	-0.49012	-0.4708	-0.67355
655	113.396361757314	23.0199342309558	745596.78245683	2547735.70695326	8	2.07944	-0.88824	-0.82321	-0.35137	-0.44332	-0.30186	-1.11886	-0.77389	-0.23238	-0.49347	-0.45863	-0.25588	-0.40964	-0.49348	-0.0077	-0.60616	0.21463	-0.62999
656	113.251745140485	23.1213722786752	730596.782456829	2558735.70695326	4	1.38629	-1.00739	-0.69796	-1.28453	-1.0487	-0.44728	0.36414	-0.68004	4.2068	3.38534	3.63867	2.74262	2.67666	2.53322	-1.00307	-0.76554	-0.97092	-0.9997
657	113.202065816516	23.0679017981351	725596.78245683	2552735.70695326	1	0	-0.2199	-0.57838	-0.24831	-0.74906	-0.54058	0.36414	-0.68004	-0.23238	0.13642	-0.56369	-0.60864	-0.40964	-0.49348	-1.03445	-0.51225	-0.19063	-0.28688
658	113.487606724485	23.2081009054885	754596.782456831	2568735.70695326	0		1.40335	1.464	-0.77838	0.51078	3.02735	0.8542	1.33731	-0.41734	-0.59293	-0.56369	-0.60864	-0.40964	-0.49348	-0.79568	-0.90754	1.57531	0.44024
659	113.448880707951	23.2267639038244	750596.782456829	2570735.70695326	0		1.76113	1.68553	1.21202	1.93489	0.25914	0.8542	1.33731	-0.50982	-0.62608	-0.59371	-0.60864	-0.40964	-0.49348	0.43841	1.42099	0.19961	3.48113
660	113.264087866984	23.2746770400419	731596.782456829	2575735.70695326	0		0.15123	-0.13845	-0.10822	0.78244	0.57314	-1.12898	-0.99874	-0.50982	-0.62608	-0.59371	-0.60864	-0.40964	-0.49348	1.87927	0.19714	1.27615	1.22573
661	113.357829560227	23.0475974224014	741596.78245683	2550735.70695326	0		0.20096	-0.6429	-0.58859	0.1314	-0.69956	0.96273	-0.43373	-0.50982	-0.62608	-0.5787	-0.60864	-0.40964	-0.49348	-0.22325	0.19452	0.31943	0.78013
662	113.243641001693	23.2208006295085	729596.782456829	2569735.70695326	2	0.693147	-0.91245	-0.47868	-0.21395	0.63174	-0.25789	-1.12898	-0.99874	-0.50982	-0.06249	0.53192	2.21347	-0.40964	-0.33418	-0.07659	-0.193	-0.42777	0.06173
663	113.283935928591	23.2924456330153	733596.782456831	2577735.70695326	0		0.50789	0.62296	-0.13029	0.56523	-0.38283	-1.12898	-0.99874	-0.50982	-0.59293	-0.59371	-0.43226	0.03126	-0.49348	-0.73441	-0.1161	0.36542	0.89009
664	113.379881844248	23.1917130718852	743596.78245683	2566735.70695326	2	0.693147	0.03364	-0.89898	-1.17162	-0.99364	-0.81965	0.96955	0.68404	-0.50982	-0.1951	-0.45863	-0.60864	-0.40964	-0.33418	-0.68095	-0.95539	-0.41626	-0.35956
665	113.361784627849	23.2732364119413	741596.763509447	2575735.68797894	1	0	-0.30503	1.17076	-0.61476	0.38458	-0.14788	-1.12898	-0.99874	-0.41734	-0.62608	-0.56369	-0.60864	-0.40964	-0.49348	0.41985	0.67266	-0.27922	0.05348
666	113.328570271344	23.0480312032824	738596.782456831	2550735.70695326	6	1.79176	0.26967	-0.48809	0.39334	0.40405	0.47533	0.96273	-0.43373	-0.50982	-0.59293	-0.59371	-0.60864	-0.40964	-0.49348	0.84075	-0.4043	0.2283	0.20114
667	113.379243301602	23.1556113846165	743596.78245683	2562735.70695326	0		-0.38504	-0.12499	-0.53749	-0.67325	-0.18282	0.96955	0.68404	-0.41734	-0.29456	-0.3986	0.09689	-0.40964	-0.33418	0.16772	0.34768	-0.40638	-0.21409
668	113.408040888745	23.1280904722173	746596.78245683	2559735.70695326	19	2.94444	-0.12009	-0.61573	-0.53459	-0.5294	-0.66547	0.96955	0.68404	0.50749	2.22501	2.37796	1.86071	0.47216	0.94022	-0.50208	-0.80949	-0.73821	-0.88668
669	113.579673880272	23.1657983075217	764106.968798534	2564213.79663978	0		-0.11536	-0.13295	1.88317	0.63456	1.72968	0.8542	1.33731	-0.50982	-0.62608	-0.59371	-0.60864	-0.40964	-0.49348	1.02539	1.45043	0.1415	-0.15245
670	113.535913008439	23.1802478137258	759596.782456829	2565735.70695326	4	1.38629	0.13088	-0.0597	1.21483	-0.2363	-0.0597	0.8542	1.33731	-0.50982	-0.62608	-0.59371	-0.60864	-0.40964	-0.49348	1.15311	0.91962	2.51407	-0.23323
671	113.506628836127	23.1807170703979	756596.782456831	2565735.70695326	48	3.8712	-0.18249	-0.20895	0.58405	-0.53848	-0.0654	0.8542	1.33731	-0.13989	-0.52663	0.06666	-0.25588	-0.40964	-0.33418	-0.1787	-0.52806	-0.48543	-0.42617
672	113.340514037516	23.1742477829869	739596.782456831	2564735.70695326	3	1.09861	-0.55143	-0.59028	-1.19095	-0.73565	-1.02501	0.96955	0.68404	0.23004	1.86033	2.51303	0.9788	0.03126	1.25882	-0.82533	-0.81948	-0.91298	-1.00139
673	113.535233003259	23.144150313072	759596.782456829	2561735.70695326	19	2.94444	0.28705	-0.72727	3.65536	-0.35185	-0.62337	0.8542	1.33731	-0.50982	-0.59293	-0.54868	-0.60864	-0.40964	-0.49348	-0.59972	1.50696	-0.05315	-0.05079
674	113.495362652027	23.0996502091376	755596.782456831	2556735.70695326	2	0.693147	-1.16395	-0.80382	-0.19942	1.01857	0.66738	0.8542	1.33731	-0.50982	-0.59293	-0.59371	-0.60864	-0.40964	-0.49348	1.12427	-0.43859	0.79395	0.5372
675	113.18621968235	23.2938387084249	723596.78245683	2577735.70695326	0		-0.33202	2.2969	0.89819	1.62315	0.29309	-1.12898	-0.99874	-0.50982	-0.62608	-0.59371	-0.60864	-0.40964	-0.49348	-0.28903	2.81209	2.2206	1.98432
676	113.448716045387	23.2177389996732	750596.782456829	2569735.70695326	0		2.2457	1.79337	1.90805	1.13565	-0.10175	0.8542	1.33731	-0.50982	-0.62608	-0.56369	-0.60864	-0.40964	-0.49348	-0.44361	0.91753	-0.61333	3.05433
677	113.496867276047	23.1808722808245	755596.782456831	2565735.70695326	3	1.09861	0.00879	-0.67657	0.3487	-0.86718	0.274	0.8542	1.33731	-0.32486	-0.49347	-0.41361	-0.43226	0.91306	-0.33418	-0.588	-0.54833	-0.46075	-0.46859
678	113.46857717901	23.2354830203606	752596.782456831	2571735.70695326	0		2.96231	4.15426	0.1398	1.16579	1.99629	0.8542	1.33731	-0.50982	-0.62608	-0.59371	-0.60864	-0.40964	-0.49348	1.92143	0.85261	1.84022	2.83109
679	113.576705434103	23.2313076540122	763674.266257331	2571465.55319534	1	0	0.57784	0.92689	1.06305	1.02748	0.50343	0.8542	1.33731	-0.50982	-0.62608	-0.59371	-0.60864	-0.40964	-0.49348	1.49043	1.80554	2.58721	1.43302
680	113.204575211852	23.2213535107719	725596.78245683	2569735.70695326	0		-0.89514	-0.70756	-0.4387	1.11193	-0.21891	-1.12898	-0.99874	-0.32486	-0.39402	-0.00838	1.15518	-0.40964	-0.49348	-0.02321	-0.65919	-0.87781	-0.42548
681	113.359563755195	23.1468795263398	741596.78245683	2561735.70695326	14	2.63906	-0.21768	-0.51477	-1.11691	-1.17418	-0.73952	0.96955	0.68404	0.78494	-0.02934	-0.41361	-0.43226	0.47216	-0.49348	-0.79991	-0.52481	-0.75232	-0.37967
682	113.337856038107	23.0208096563607	739596.782456831	2547735.70695326	2	0.693147	-0.82673	-0.97016	1.26767	-0.60741	-0.35164	-1.11886	-0.77389	0.13756	0.43479	0.03665	-0.07949	-0.40964	-0.17488	-0.60682	-0.28643	-0.71779	-0.36386
683	113.370118562432	23.1918604891414	742596.78245683	2566735.70695326	1	0	-0.64131	-0.77996	-0.90399	-0.84891	-0.75987	0.96955	0.68404	0.04507	0.53425	2.21287	1.33156	0.91306	1.57742	-0.63443	-0.86373	-0.69343	-0.8462
684	113.455191663582	23.0370873817223	751596.78245683	2549735.70695326	0		-1.2249	-1.0918	-0.01921	-0.7289	-0.59928	-1.11886	-0.77389	-0.41734	-0.49347	-0.00838	-0.25588	0.03126	-0.17488	-0.54281	1.22852	-0.64981	-0.77175
685	113.261201614179	23.1031801056285	731596.782456829	2556735.70695326	7	1.94591	-0.87721	-0.16249	-1.03695	-0.73568	-0.49313	0.96273	-0.43373	4.76169	3.78316	1.35739	0.80242	1.79486	4.28553	-0.96756	-0.58915	-0.91936	-1.10788
686	113.272939550643	23.2203796072113	732596.78245683	2569735.70695326	14	2.63906	-0.29953	-0.66257	-1.1289	-1.1247	-1.05063	-1.12898	-0.99874	0.50749	1.36305	1.3874	0.27327	0.47216	1.57742	-0.58836	-0.91893	-0.72283	-0.6938
687	113.44592939473	23.0643138791144	750596.782456829	2552735.70695326	0		-0.52955	-1.07472	0.29769	1.32621	0.67276	-1.11886	-0.77389	-0.50982	-0.62608	-0.59371	-0.60864	-0.40964	-0.49348	3.37973	0.00657	1.8208	-0.11319
688	113.427395133403	23.1187659449818	748596.782456829	2558735.70695326	6	1.79176	-1.08504	-0.86064	0.23868	-0.43604	-0.76236	0.96955	0.68404	0.50749	1.86033	0.68201	0.27327	0.03126	0.62162	-0.969	-0.66741	-0.82605	-0.68078
689	113.338167565061	23.0388613702875	739596.782456831	2549735.70695326	2	0.693147	0.07213	-0.84243	0.73493	0.26941	0.30593	-1.11886	-0.77389	-0.41734	-0.39402	0.03665	-0.07949	-0.40964	0.14372	0.0592	-0.95145	-0.44862	-0.33566
690	113.192310277601	23.0680374979435	724596.78245683	2552735.70695326	2	0.693147	-0.61627	-0.35823	0.44803	-0.85646	-0.75688	0.36414	-0.68004	0.23004	-0.06249	0.39685	0.09689	-0.40964	-0.49348	-0.70097	-0.95464	-0.79507	-0.51112
691	113.397480733269	23.0831123580481	745596.78245683	2554735.70695326	1	0	0.01132	-0.14468	-0.91417	-0.55718	0.00226	0.96273	-0.43373	-0.50982	-0.62608	-0.5787	-0.43226	-0.40964	-0.49348	0.95368	0.02759	0.00118	0.10222
692	113.407235949333	23.0829639024576	746596.78245683	2554735.70695326	0		-0.199	0.34631	-0.45729	-1.03326	-0.68687	0.96273	-0.43373	-0.41734	-0.39402	-0.2185	-0.43226	0.47216	-0.33418	-0.43349	-0.22122	-0.29709	-0.8985
693	113.283166383143	23.2473159816437	733596.782456831	2572735.70695326	6	1.79176	-0.84941	-0.26933	-1.14621	-0.63824	-0.95485	-1.12898	-0.99874	-0.41734	0.10327	-0.20349	-0.25588	0.91306	-0.01558	-0.53017	-0.39928	-0.62814	-0.61842
694	113.460508837282	23.0227879411424	752168.523422961	2548160.89333722	0		-0.44835	-0.76425	0.86847	0.3311	0.09651	-1.11886	-0.77389	-0.50982	-0.62608	-0.59371	-0.60864	-0.40964	-0.49348	0.74448	1.48894	-0.08501	-0.04913
695	113.253104373956	23.2026085204334	730596.782456829	2567735.70695326	0		-0.53101	-0.68996	-0.64491	-0.9668	-0.67804	-1.12898	-0.99874	1.06238	1.86033	1.47745	1.50794	0.47216	1.41812	-0.83898	-0.6679	-0.59485	-0.67458
696	113.376701932392	23.011202818281	743596.78245683	2546735.70695326	1	0	-0.33245	-0.618	0.05067	-0.96247	-0.63641	-1.11886	-0.77389	-0.04741	0.23588	0.14171	0.27327	-0.40964	-0.33418	-0.57203	-0.41818	-0.72297	-0.85577
697	113.262522719502	23.307534690087	731379.768108868	2579372.6356902	0		-0.6059	0.0146	1.31192	-0.60309	1.1849	-1.12898	-0.99874	-0.50982	-0.62608	-0.59371	-0.60864	-0.40964	-0.49348	-0.49582	0.18995	0.08573	0.32284
698	113.445876538534	23.2541907312053	750238.024835684	2573768.6761226	0		-0.05877	3.32429	-0.50215	-0.01387	0.73648	-1.12898	-0.99874	-0.50982	-0.62608	-0.59371	-0.60864	-0.40964	-0.49348	0.17957	2.57684	0.62474	0.47473
699	113.50478360692	23.0814462634018	756596.782456831	2554735.70695326	0		-0.67569	-0.96055	0.83855	1.38979	-0.42531	0.8542	1.33731	0.23004	-0.32771	-0.47364	-0.25588	0.47216	-0.33418	-0.5574	-0.8148	-0.66087	0.24119
700	113.282245471239	23.1931600262296	733596.782456831	2566735.70695326	3	1.09861	-0.52217	-0.43004	-0.85011	-0.38015	0.09993	-1.12898	-0.99874	-0.13989	-0.26141	-0.5787	-0.43226	0.47216	-0.49348	0.18153	-0.75113	-0.39181	-0.32223
701	113.244093934526	23.2478792876416	729596.782456829	2572735.70695326	3	1.09861	-0.21948	-0.10988	-0.21356	-0.27223	-0.96515	-1.12898	-0.99874	-0.50982	-0.32771	-0.35357	0.09689	-0.40964	-0.49348	0.41142	0.4823	-0.17809	-0.53034
702	113.57582238441	23.224733920551	763596.78245683	2570735.70695326	18	2.89037	1.39756	0.64576	0.58454	1.00875	-0.46173	0.8542	1.33731	-0.41734	-0.59293	-0.56369	-0.43226	-0.40964	-0.49348	-0.08819	2.1125	1.79656	0.77739
703	113.42755758619	23.1277911060927	748596.782456829	2559735.70695326	11	2.3979	-0.86114	-1.06419	-0.28635	0.12004	-0.88462	0.96955	0.68404	-0.50982	0.36848	0.77206	0.9788	0.03126	-0.01558	-1.00844	-0.28009	-0.93587	-0.63761
704	113.271415079686	23.1301185033645	732596.78245683	2559735.70695326	19	2.94444	-1.02099	-0.96127	-0.83549	-1.08195	-0.08292	1.03026	1.28127	6.05645	3.94892	1.79263	1.33156	5.32206	1.41812	-0.85825	-0.98005	-0.92015	-1.07558
705	113.376324879025	22.993494091144	743589.930474492	2544773.54856413	3	1.09861	-0.05885	-0.29301	-0.08884	-0.96464	-1.02562	-1.11886	-0.77389	-0.41734	-0.42717	-0.14345	-0.25588	-0.40964	-0.49348	-0.75364	0.41187	-0.52456	-0.7055
706	113.456832019027	23.1273375356481	751596.78245683	2559735.70695326	2	0.693147	-0.34793	-0.30228	0.30517	0.30364	-0.9162	0.8542	1.33731	-0.41734	-0.42717	-0.32356	-0.60864	-0.40964	-0.49348	-0.83514	-0.74105	-0.26919	-0.31979
707	113.51771000466	23.0390629918155	758002.454633713	2550063.47151167	0		4.07365	0.91191	0.34438	-0.1106	0.60561	0.8542	1.33731	-0.50982	-0.62608	-0.59371	-0.60864	-0.40964	-0.49348	1.44215	-0.1717	1.05688	1.49292
708	113.24041591964	23.0439713484034	729567.661828245	2550144.91189026	0		-0.13657	-0.49251	1.32461	-0.13819	0.59877	0.36414	-0.68004	-0.50982	-0.59293	-0.53367	-0.60864	-0.40964	-0.49348	-0.57081	-0.44549	1.33406	0.04916
709	113.186533239311	23.2161768023066	723758.532229258	2569134.42319568	0		1.71816	1.34201	0.48584	1.98873	0.64961	-1.12898	-0.99874	-0.50982	-0.62608	-0.59371	-0.60864	-0.40964	-0.49348	-0.61031	-0.05532	0.81047	1.6651
710	113.263021307323	23.211494433165	731596.782456829	2568735.70695326	4	1.38629	-0.70477	-0.9785	-0.98666	-0.3604	-0.53825	-1.12898	-0.99874	-0.04741	0.99838	0.77206	0.27327	0.47216	-0.01558	-0.86028	-0.83089	-0.60373	-0.51399
711	113.233124564756	23.1758081347961	728596.78245683	2564735.70695326	0		-0.33789	-0.77731	-0.81852	-0.40579	-0.83112	-1.12898	-0.99874	0.415	0.50109	0.80208	0.80242	-0.40964	0.46232	-0.21344	-0.79537	-0.61762	-0.58635
712	113.329814947621	23.1202380187814	738596.782456831	2558735.70695326	14	2.63906	-0.4563	-0.6333	-0.29815	-0.77279	0.11529	0.96955	0.68404	1.24735	3.65055	2.42298	3.97729	1.35396	6.03783	-0.69253	-0.93324	-0.96293	-0.96684
713	113.242436508821	23.1485903782174	729596.782456829	2561735.70695326	3	1.09861	-0.37208	-0.70865	-0.34747	-1.11411	-0.36085	0.36414	-0.68004	1.15487	1.3962	1.2073	1.50794	1.35396	0.78092	-1.03656	-0.72822	-0.83075	-1.01451
714	113.515715528085	23.1444632113886	757596.782456831	2561735.70695326	10	2.30259	-0.05259	0.68994	2.97064	-0.48153	-0.6097	0.8542	1.33731	-0.50982	-0.55978	-0.59371	-0.60864	-0.40964	-0.49348	-0.50701	0.8221	-0.06705	0.69751
715	113.319746156201	23.1023301500709	737596.782456831	2556735.70695326	25	3.21888	-0.67026	-0.71736	-1.17816	-0.67898	-0.4753	0.96273	-0.43373	1.5248	1.89349	0.26177	0.09689	2.23576	0.62162	-0.98871	-0.8002	-0.76628	-0.82968
716	113.457490474027	23.163437277414	751596.78245683	2563735.70695326	88	4.47734	-0.30727	-0.87021	-0.60294	-0.99257	-0.54878	0.8542	1.33731	-0.32486	-0.32771	-0.30855	0.44965	0.03126	-0.17488	-0.82002	-0.62676	-0.69931	-0.63904
717	113.477011567338	23.1631313522112	753596.782456831	2563735.70695326	18	2.89037	1.48053	-0.71481	-0.0464	-0.96914	-0.13147	0.8542	1.33731	-0.32486	-0.39402	-0.48865	-0.60864	-0.40964	-0.49348	-0.33148	-0.46156	-0.47321	-0.78574
718	113.35735826176	23.020520247207	741596.78245683	2547735.70695326	4	1.38629	-0.93357	-0.44881	0.2369	-0.1534	-0.16697	-1.11886	-0.77389	-0.23238	-0.52663	-0.29354	-0.25588	-0.40964	-0.17488	-0.37243	-0.51782	-0.59466	0.11746
719	113.437969049721	23.1637407873089	749596.782456829	2563735.70695326	84	4.43082	-0.40168	-0.73015	-0.40428	-1.12811	-0.81187	0.8542	1.33731	-0.50982	0.66685	-0.36858	-0.43226	0.47216	-0.49348	-1.04337	-0.72085	-0.59914	-0.78007
720	113.351381919056	23.2372813173451	740596.78245683	2571735.70695326	1	0	-1.15376	-0.33927	-0.86439	0.04947	-0.09839	-1.12898	-0.99874	0.13756	-0.46032	-0.0534	0.62603	-0.40964	-0.49348	-0.68974	1.00747	-0.94572	0.03089
721	113.300077867708	23.0935898561063	735596.782456831	2555735.70695326	6	1.79176	-0.7128	-0.67069	-1.33674	-1.136	-0.32514	0.96273	-0.43373	0.69245	0.79946	0.53192	0.09689	5.32206	-0.01558	-0.52822	-0.71328	-0.75318	-0.80388
722	113.4771776939	23.1721561262655	753596.782456831	2564735.70695326	40	3.68888	0.2699	-0.42498	-0.25678	-0.93089	0.03305	0.8542	1.33731	-0.32486	-0.29456	-0.42861	-0.25588	-0.40964	-0.17488	-0.63122	-0.81809	-0.30565	-0.80134
723	113.185116767744	23.2216949419492	723604.335074053	2569743.4232173	0		0.75664	1.52932	0.827	2.34899	0.30132	-1.12898	-0.99874	-0.50982	-0.62608	-0.59371	-0.60864	-0.40964	-0.49348	-0.09283	-0.15404	0.43068	1.18201
724	113.316818372885	22.9698520975344	737529.106442102	2542057.21480842	0		-1.06506	-1.06392	-0.1021	0.74227	-0.86672	-1.11886	-0.77389	-0.32486	-0.02934	0.83209	0.09689	0.03126	0.62162	-0.75388	-0.0879	-0.94233	-0.95362
725	113.407879738931	23.1190651810238	746596.78245683	2558735.70695326	21	3.04452	-0.36171	-0.3779	-0.49237	-0.99861	-0.70979	0.96955	0.68404	1.80225	2.75544	3.66868	2.919	0.47216	3.48903	-0.89343	-0.3966	-0.77423	-0.99996
726	113.380361593242	23.2187892177824	743596.78245683	2569735.70695326	3	1.09861	-1.01317	-0.10015	-1.04688	0.4871	-0.32321	0.96955	0.68404	-0.32486	-0.42717	-0.38359	-0.07949	-0.40964	-0.49348	-0.23648	0.63817	-0.03202	-0.19309
727	113.254343365768	23.3095003830626	730539.605516182	2579577.30522634	0		0.87516	0.4217	1.24967	-0.21448	0.78664	-1.12898	-0.99874	-0.50982	-0.62608	-0.59371	-0.60864	-0.40964	-0.49348	1.60746	0.54602	0.71948	0.9663
728	113.268991814462	22.985698394078	732596.78245683	2543735.70695326	3	1.09861	0.42532	-0.88558	1.4347	-0.77861	0.42444	-1.11886	-0.77389	-0.41734	0.16957	-0.2335	-0.25588	0.47216	-0.49348	-0.73249	-0.9522	-0.95592	-0.71095
729	113.279044053726	23.0036109822618	733596.782456831	2545735.70695326	16	2.77259	-0.23796	-0.09333	-0.07688	0.1447	-0.33719	-1.11886	-0.77389	-0.50982	-0.55978	-0.5787	-0.60864	-0.40964	-0.49348	0.25556	-0.49368	-0.46676	-0.11705
730	113.56058233026	23.1061106142648	762267.652403096	2557567.14704558	0		-0.95058	-0.83737	2.4777	-0.29049	-0.32566	-6.40891	-0.86045	-0.41734	-0.62608	-0.44362	-0.43226	0.03126	-0.33418	-0.75589	-0.49725	-0.74501	-0.03328
731	113.426098448258	23.0465642460148	748596.782456829	2550735.70695326	4	1.38629	-0.09275	-0.09785	-1.27807	-0.05988	0.34635	-1.11886	-0.77389	-0.50982	-0.36086	-0.5787	-0.60864	-0.40964	-0.49348	0.20771	0.18282	-0.70944	0.65
732	113.299924195372	23.0845638230328	735596.782456831	2554735.70695326	0		-0.89198	-0.13735	-0.9886	-0.5226	-0.61111	0.96273	-0.43373	0.87742	0.89892	2.37796	2.03709	0.47216	0.78092	-0.22109	-0.77702	-0.81496	-0.81768
733	113.281633068659	23.1570558297905	733596.782456831	2562735.70695326	0		-0.57581	-0.38837	-1.12161	-1.07934	0.25769	1.03026	1.28127	0.04507	0.23588	-0.3986	-0.60864	-0.40964	-0.49348	-0.09852	-0.67543	-0.6621	-0.4167
734	113.348546605561	23.074819879914	740596.78245683	2553735.70695326	0		-0.06131	-0.21619	-0.42235	-0.10997	-0.91375	0.96273	-0.43373	-0.41734	0.13642	0.63698	0.27327	0.03126	0.62162	-0.54237	-0.50392	-0.7765	-0.60734
735	113.408363431439	23.1461410204408	746596.78245683	2561735.70695326	1	0	-0.46918	-0.42785	-0.89975	-0.68471	-0.71745	0.96955	0.68404	-0.04741	0.36848	-0.20349	-0.25588	0.47216	0.14372	-0.57435	-0.93829	-0.6049	-0.44833
736	113.476845524181	23.1541065666957	753596.782456831	2562735.70695326	0		0.89376	-0.32425	0.43612	-0.81195	-0.20227	0.8542	1.33731	-0.50982	-0.46032	-0.59371	-0.60864	-0.40964	-0.49348	0.34563	-0.26664	-0.07147	-0.14087
737	113.399569311411	23.2004416877769	745596.78245683	2567735.70695326	6	1.79176	-0.3152	0.65366	-0.45464	0.16403	-0.23135	0.96955	0.68404	-0.41734	-0.55978	-0.42861	-0.25588	-0.40964	-0.49348	0.64441	-0.58803	-0.07403	-0.19464
738	113.495195891331	23.0906254771941	755596.782456831	2555735.70695326	1	0	-0.48002	-0.63936	-0.00551	1.32902	0.70893	0.8542	1.33731	0.13756	-0.55978	-0.5787	-0.60864	-0.40964	-0.49348	0.33289	-0.63792	-0.57106	-0.11977
739	113.340828239069	23.1922991120517	739596.782456831	2566735.70695326	1	0	0.29558	-0.44272	-1.04378	-0.27383	-0.56767	0.96955	0.68404	0.04507	0.50109	0.36683	0.62603	0.03126	-0.01558	-0.40183	-0.20331	-0.79787	-1.02074
740	113.270352499041	23.0669350597517	732596.78245683	2552735.70695326	0		-0.35734	-0.19462	-0.29757	-0.65256	-0.75163	0.36414	-0.68004	-0.04741	0.07011	-0.36858	-0.25588	0.03126	0.14372	-0.36209	-0.57553	-0.60237	-0.56122
741	113.468079261339	23.2084087050088	752596.782456831	2568735.70695326	0		1.73909	2.20031	0.53088	0.75798	0.64277	0.8542	1.33731	-0.50982	-0.62608	-0.59371	-0.60864	-0.40964	-0.49348	0.38384	-0.12518	2.24006	2.04684
742	113.31928123654	23.0752524236247	737596.782456831	2553735.70695326	1	0	-1.00106	-0.70518	-0.72056	-0.27733	-1.01661	0.96273	-0.43373	-0.32486	0.50109	0.23176	0.80242	0.47216	0.30302	-0.45047	-0.84984	-0.88558	-0.7329
743	113.291394443083	23.1569141026131	734596.782456831	2562735.70695326	0		-1.09242	-0.85445	-0.61707	-0.5289	0.04788	1.03026	1.28127	-0.50982	-0.1288	-0.35357	-0.60864	0.03126	-0.49348	-0.35785	-0.87175	-0.36886	-0.1647
744	113.406112431018	23.0197862274373	746596.78245683	2547735.70695326	0		0.75248	-0.12417	-0.89532	-0.68105	-0.48073	-1.11886	-0.77389	-0.41734	-0.59293	-0.48865	-0.60864	-0.40964	-0.49348	-0.78803	-0.33757	1.0395	0.30301
745	113.544650819115	23.1259442764745	760596.782456829	2559735.70695326	2	0.693147	1.14314	-0.29207	3.47784	-0.3781	-0.41727	0.8542	1.33731	-0.50982	-0.16195	-0.41361	-0.43226	-0.40964	-0.33418	-0.31926	0.60728	-0.46683	0.27175
746	113.497202561491	23.1989215038379	755596.782456831	2567735.70695326	0		1.37074	0.09136	-0.98838	0.38664	2.48221	0.8542	1.33731	-0.50982	-0.62608	-0.59371	-0.60864	-0.40964	-0.49348	0.13563	-0.26097	1.25912	0.40246
747	113.298086150072	22.9762505475095	735596.782456831	2542735.70695326	1	0	-0.33285	-0.57388	1.19786	-0.51866	-0.55579	-1.11886	-0.77389	-0.41734	-0.1951	-0.41361	-0.43226	-0.40964	-0.49348	-0.05599	-0.22926	-0.49303	-0.40896
748	113.508747754605	23.0493950730158	757064.007309596	2551192.21899872	0		1.94147	0.59287	0.09249	0.0308	0.35944	0.8542	1.33731	-0.50982	-0.62608	-0.59371	-0.60864	-0.40964	-0.49348	1.506	-0.13972	1.07926	0.88186
749	113.466755139859	23.1362100262796	752596.782456831	2560735.70695326	2	0.693147	-0.04128	-0.39546	0.65906	0.13646	-0.71323	0.8542	1.33731	-0.41734	-0.46032	-0.44362	-0.43226	-0.40964	-0.49348	-0.8741	-0.42055	-0.41914	-0.82889
750	113.259122026557	22.9768452183472	731599.755362334	2542739.50570454	0		-1.17753	-0.59286	2.42729	-0.1042	-0.32253	-1.11886	-0.77389	-0.50982	-0.55978	-0.00838	0.44965	-0.40964	-0.33418	-0.34662	-0.62855	-0.75146	-0.77019
751	113.251293427044	23.0942933287393	730596.782456829	2555735.70695326	2	0.693147	-1.05639	-0.78147	-0.6965	-1.08805	-0.9146	0.36414	-0.68004	2.07969	1.52881	0.59196	0.62603	-0.40964	1.73672	-0.90466	-0.79619	-0.74256	-0.84047
752	113.34004332643	23.1471707042967	739596.782456831	2561735.70695326	52	3.95124	-0.46702	-0.66489	-1.30454	-1.0037	-0.57478	0.96955	0.68404	3.00452	3.05381	0.51692	-0.07949	3.55846	0.94022	-0.67551	-0.66839	-0.53178	-0.60271
753	113.234777276187	23.2750973350416	728596.78245683	2575735.70695326	0		-1.14824	-0.99916	-1.03105	-0.76685	0.03991	-1.12898	-0.99874	0.23004	0.43479	1.64255	1.68433	0.03126	1.89602	-1.04498	1.46124	-0.91589	-1.00053
754	113.357044458297	23.002468740567	741596.78245683	2545735.70695326	16	2.77259	-0.12829	0.75904	0.9036	-0.50999	0.24559	-1.11886	-0.77389	-0.23238	-0.55978	-0.51866	-0.25588	-0.40964	-0.17488	0.42612	-0.55557	-0.48706	-0.45189
755	113.351223728575	23.228255778472	740596.78245683	2570735.70695326	0		0.16627	0.39188	-1.13389	-0.18883	-0.31253	0.96955	0.68404	-0.50982	-0.62608	-0.5787	-0.60864	-0.40964	-0.49348	-0.01231	1.27689	0.18598	-0.39445
756	113.552715927007	23.0818835002759	761508.496894598	2554869.19935918	2	0.693147	1.24051	-0.17731	0.70825	0.3985	0.79243	0.8542	1.33731	-0.50982	-0.62608	-0.5787	-0.60864	-0.40964	-0.49348	-0.50639	-0.04672	0.9988	0.9901
757	113.417492580609	23.2597831102568	747322.529191925	2574339.44393924	0		1.21477	0.81509	1.46007	1.48555	1.47968	-1.12898	-0.99874	-0.50982	-0.62608	-0.59371	-0.60864	-0.40964	-0.49348	-0.36477	3.19545	0.82539	0.78407
758	113.347763561633	23.0296910513345	740596.78245683	2548735.70695326	0		1.05097	-0.69835	0.31102	0.50435	1.03004	-1.11886	-0.77389	-0.13989	0.00381	-0.29354	-0.43226	-0.40964	-0.49348	-0.20151	-0.44436	-0.32505	-0.65113
759	113.534554363156	23.1080526283192	759596.782456829	2557735.70695326	0		0.15144	-0.41034	1.97319	-0.27989	-0.80477	0.8542	1.33731	-0.32486	-0.36086	-0.48865	-0.60864	-0.40964	-0.49348	-0.63938	-0.20732	0.28562	0.00531
760	113.358144154994	23.0656488159774	741596.78245683	2552735.70695326	0		-0.41585	-0.82557	0.07268	-0.17642	-0.44277	0.96273	-0.43373	0.23004	-0.26141	-0.06841	0.9788	0.03126	-0.49348	-0.69033	-0.03812	-0.46903	-0.57069
761	113.524292138967	23.081135518522	758596.782456831	2554735.70695326	0		-0.9161	-0.72524	-0.08546	-0.11372	-0.23697	0.8542	1.33731	-0.13989	0.03696	0.38184	0.27327	-0.40964	0.78092	-0.78625	-0.73878	-0.80642	-0.47562
762	113.279195736109	23.0126372397726	733596.782456831	2546735.70695326	0		-0.369	0.47022	-0.34542	0.59683	-1.03256	-1.11886	-0.77389	-0.41734	-0.29456	-0.17347	-0.43226	-0.40964	-0.33418	-0.78486	-0.68296	-0.42388	-0.31563
763	113.25204666151	23.1394248557072	730596.782456829	2560735.70695326	22	3.09104	-0.91165	-0.74174	-0.94283	-1.18859	-0.36422	0.36414	-0.68004	2.26466	1.46251	0.57695	0.62603	1.79486	-0.01558	-0.93994	-0.77187	-0.88013	-1.11571
764	113.320367141172	23.1384336270956	737596.782456831	2560735.70695326	28	3.3322	-0.66238	-0.31011	-0.96881	-1.04454	0.1513	0.96955	0.68404	1.61728	3.21958	2.61809	3.44815	2.23576	3.96693	-0.67051	-0.79156	-0.92087	-1.01877
765	113.214502222048	23.1404448235806	726749.384717273	2560789.7425369	0		1.77104	-0.25775	-0.48051	-0.36486	-0.00434	0.36414	-0.68004	-0.41734	-0.62608	-0.5787	-0.60864	-0.40964	-0.49348	0.26335	-0.73013	-0.17278	-0.06194
766	113.320056492596	23.1203819112007	737596.782456831	2558735.70695326	16	2.77259	-0.83502	-0.6174	-0.12675	-1.09092	-0.73732	1.03026	1.28127	1.06238	5.30817	3.32349	4.15367	2.67666	3.80763	-0.87815	-1.03135	-0.808	-1.08537
767	113.573577984559	23.2070141261008	763401.77580893	2568768.62867372	2	0.693147	1.1459	0.14995	-0.44074	-9e-05	-0.4746	0.8542	1.33731	-0.50982	-0.62608	-0.5787	-0.60864	-0.40964	-0.49348	-0.84418	2.66642	0.42753	0.96955
768	113.216589237482	23.3086622858145	726678.771362715	2579424.81772751	1	0	1.36753	1.12859	0.8251	-0.33508	0.62123	-1.12898	-0.99874	-0.50982	-0.62608	-0.59371	-0.60864	-0.40964	-0.49348	-0.35847	2.40447	0.55053	0.33112
769	113.292163407401	23.2020440121379	734596.782456831	2567735.70695326	0		-0.45103	-0.80146	-1.25516	-0.87594	-0.42749	-1.12898	-0.99874	-0.41734	0.03696	-0.29354	-0.43226	0.91306	-0.33418	-0.1783	-0.40293	-0.68518	-0.49291
770	113.367424671325	23.0384259772644	742596.78245683	2549735.70695326	0		-1.18379	0.53974	-1.23865	-0.55339	-0.24062	-1.11886	-0.77389	-0.50982	-0.32771	-0.54868	-0.60864	0.91306	-0.33418	-0.50879	0.27568	-0.1265	-0.36463
771	113.389324306839	23.1735143573364	744596.78245683	2564735.70695326	6	1.79176	-0.56225	-0.48489	0.03642	0.19516	-0.64545	0.96955	0.68404	-0.41734	-0.42717	-0.36858	0.09689	-0.40964	-0.49348	0.33101	-0.09441	-0.40033	0.03078
772	113.2711111034	23.1120661472108	732596.78245683	2557735.70695326	5	1.60944	-0.7217	-0.88261	-1.23234	-1.08059	-0.75384	1.03026	1.28127	2.26466	2.58968	1.26734	0.80242	3.99936	3.17043	-0.68673	-0.76556	-0.80817	-0.87716
773	113.348076542663	23.0477426166812	740596.78245683	2550735.70695326	0		1.37956	-0.41923	0.06466	0.92867	-0.95742	0.96273	-0.43373	-0.50982	-0.59293	-0.59371	-0.60864	-0.40964	-0.49348	-0.71862	-0.22607	0.91722	1.01215
774	113.556293833127	23.2250528863175	761596.78245683	2570735.70695326	0		-0.08991	-0.6373	0.33251	0.55201	0.33106	0.8542	1.33731	-0.50982	-0.62608	-0.59371	-0.60864	-0.40964	-0.49348	0.30728	1.18452	0.76888	0.12157
775	113.205466006059	23.2755121631686	725596.78245683	2575735.70695326	1	0	-0.8351	-0.50228	-1.10435	1.26146	-0.33734	-1.12898	-0.99874	-0.23238	-0.62608	0.15671	-0.43226	0.47216	-0.49348	-0.52587	1.35659	-0.37548	-0.45593
776	113.201944694262	23.0588987802941	725599.389525753	2551738.36671435	0		0.1525	-0.51152	0.08377	-0.91571	-0.43761	0.36414	-0.68004	-0.23238	0.00381	-0.44362	0.09689	-0.40964	-0.49348	-0.94193	-0.40096	-0.4471	-0.40076
777	113.360038384061	23.1739562255832	741596.78245683	2564735.70695326	3	1.09861	-0.71499	-0.64545	-1.17545	-1.08595	-0.06921	0.96955	0.68404	-0.32486	-0.09565	-0.48865	-0.60864	-0.40964	-0.49348	-0.76355	-0.41801	-0.67358	-0.1164
778	113.151539111092	23.289415940946	720055.922370071	2577192.71200293	0		1.81139	2.17387	2.89635	4.61422	3.64177	-1.12898	-0.99874	-0.50982	-0.62608	-0.59371	-0.60864	-0.40964	-0.49348	2.42406	3.70294	6.02757	5.3481
779	113.397160623378	23.0650615213364	745596.78245683	2552735.70695326	43	3.7612	-0.61389	-0.59073	-1.33689	-0.98841	0.52415	0.8542	1.33731	-0.04741	-0.09565	0.86211	0.44965	0.91306	0.14372	-0.30583	-0.32865	-0.49601	-0.30047
780	113.377811264398	23.0743819233227	743596.78245683	2553735.70695326	15	2.70805	-0.98978	-0.95093	-0.51232	-0.85877	-0.53117	0.96273	-0.43373	-0.23238	-0.09565	-0.20349	0.9788	0.03126	-0.33418	-0.69068	-0.63439	-0.79764	-0.48327
781	113.224557254449	23.2481573009742	727596.78245683	2572735.70695326	3	1.09861	0.81803	0.40787	0.55113	1.37955	-0.54354	-1.12898	-0.99874	-0.50982	-0.42717	-0.5787	-0.07949	-0.40964	-0.49348	-0.63733	-0.2854	0.16857	-0.203
782	113.273857911419	23.274535726937	732596.78245683	2575735.70695326	0		-0.71124	-0.73676	0.083	0.9127	0.04489	-1.12898	-0.99874	-0.50982	-0.62608	-0.59371	-0.60864	-0.40964	-0.49348	0.56274	-0.13445	0.80283	1.18065
783	113.436501110857	23.0825149263288	749596.782456829	2554735.70695326	0		-0.78478	-0.55757	-0.56674	0.34768	-0.1661	0.8542	1.33731	-0.41734	-0.42717	-0.33856	-0.25588	-0.40964	-0.49348	-0.12957	-0.65258	-0.29942	-0.5201
784	113.244698905467	23.2839840069956	729596.782456829	2576735.70695326	4	1.38629	-0.64088	0.02228	-0.82294	-0.80463	-0.20677	-1.12898	-0.99874	-0.50982	-0.52663	-0.47364	-0.07949	-0.40964	-0.49348	-0.73417	1.41955	-0.27475	-0.50353
785	113.352015474556	23.2733833589927	740596.78245683	2575735.70695326	1	0	0.34376	0.82534	-0.62046	0.42076	-0.7916	-1.12898	-0.99874	-0.32486	-0.26141	-0.33856	-0.60864	-0.40964	-0.49348	-0.44864	0.46608	-0.53023	-0.53251
786	113.52564352924	23.1533315243186	758596.782456831	2562735.70695326	8	2.07944	0.69353	0.60787	3.1339	-0.15441	-0.75092	0.8542	1.33731	-0.50982	-0.29456	-0.48865	-0.60864	-0.40964	-0.49348	-0.82869	0.72027	-0.05973	-0.89838
787	113.20350754958	23.1439547508813	725617.341785107	2561161.42598054	0		0.61349	0.35186	0.24605	-0.15229	0.40635	-1.12898	-0.99874	-0.50982	-0.59293	-0.59371	-0.60864	-0.40964	-0.49348	-0.67921	-0.39072	-0.68861	-0.2661
788	113.29839171965	22.9943028726088	735596.782456831	2544735.70695326	10	2.30259	0.89145	0.14987	0.17442	-0.68652	-0.69704	-1.11886	-0.77389	-0.50982	-0.59293	-0.56369	-0.60864	-0.40964	-0.49348	-0.0189	-0.82087	0.56201	0.30336
789	113.234024913305	23.2299660495759	728596.78245683	2570735.70695326	0		-1.22212	-1.00577	0.15346	1.04459	-0.57302	-1.12898	-0.99874	-0.50982	-0.26141	-0.56369	-0.60864	-0.40964	0.14372	-0.44086	-0.16675	0.56182	0.43253
790	113.280716769153	23.1028991964688	733596.782456831	2556735.70695326	15	2.70805	-0.56934	-0.68699	-1.21773	-0.97728	0.04765	0.96273	-0.43373	4.11431	3.91577	1.19229	0.9788	0.03126	3.32973	-1.02776	-0.5711	-0.90431	-1.01645
791	113.55487526248	23.1734007685889	761552.125136388	2565011.18297609	0		0.24805	1.34778	1.04011	0.37433	0.6255	0.8542	1.33731	-0.50982	-0.62608	-0.59371	-0.60864	-0.40964	-0.49348	2.35512	1.94414	1.22115	0.98735
792	113.242737178625	23.1666430086482	729596.782456829	2563735.70695326	3	1.09861	-0.69339	-0.41882	-0.33878	-0.81063	-0.9134	1.03026	1.28127	0.78494	0.6337	0.90713	1.68433	-0.40964	0.30302	-0.91872	-0.6029	-0.57223	-0.38195
793	113.421219950899	23.0055295145926	748171.863320524	2546182.03728944	0		0.57638	0.06622	-0.35751	0.04704	0.22689	-1.11886	-0.77389	-0.50982	-0.62608	-0.59371	-0.60864	-0.40964	-0.49348	0.01056	0.34041	0.08142	0.4524
794	113.476182185088	23.1180073100968	753596.782456831	2558735.70695326	1	0	0.58826	0.43958	-0.335	0.07962	-0.30248	0.8542	1.33731	-0.50982	-0.59293	-0.59371	-0.60864	-0.40964	-0.49348	0.64462	-0.12488	0.46356	0.80673
795	113.416184921379	23.0376883155899	747596.78245683	2549735.70695326	5	1.60944	-0.80315	-0.52209	-1.18366	-0.36775	-0.53791	-1.11886	-0.77389	-0.23238	0.03696	0.3068	-0.07949	0.47216	-0.17488	-0.88247	-0.51827	-0.86587	-1.05454
796	113.311692461815	23.2017581266165	736596.782456831	2567735.70695326	0		-0.6091	0.2036	-0.84883	-0.06087	0.85921	-1.12898	-0.99874	-0.41734	-0.62608	-0.56369	-0.60864	-0.40964	-0.49348	0.47797	-0.19169	0.32707	0.09686
797	113.507639628896	23.2348641973895	756596.782456831	2571735.70695326	0		2.61542	3.45869	1.20445	3.48547	4.59868	0.8542	1.33731	-0.50982	-0.62608	-0.59371	-0.60864	-0.40964	-0.49348	0.72979	0.32021	1.53623	2.47415
798	113.580252062622	23.1845261401462	764129.396678999	2566289.51971861	0		0.24431	0.06602	0.66556	0.06466	-0.60925	0.8542	1.33731	-0.50982	-0.62608	-0.59371	-0.60864	-0.40964	-0.49348	-0.87957	2.45799	-0.52336	0.19079
799	113.330282993729	23.1473153879664	738596.782456831	2561735.70695326	53	3.97029	-0.54796	-0.63678	-1.16278	-1.05625	-0.43597	0.96955	0.68404	3.097	3.94892	1.61253	0.9788	0.03126	2.21462	-0.39734	-0.79684	-0.89909	-0.78658
800	113.455682903852	23.0641625476832	751596.78245683	2552735.70695326	0		0.35366	-0.04289	0.85166	1.41913	0.96628	-1.11886	-0.77389	-0.50982	-0.62608	-0.59371	-0.60864	-0.40964	-0.49348	1.29307	0.20768	1.95424	-0.0384
801	113.25069220196	23.0581879047864	730596.782456829	2551735.70695326	28	3.3322	-0.14734	-0.54998	0.33994	-0.56942	-0.82143	0.36414	-0.68004	0.13756	0.50109	0.44187	1.33156	-0.40964	0.14372	-0.84434	-0.77443	-0.67589	-0.91087
802	113.438787443439	23.2088658658658	749596.782456829	2568735.70695326	0		-0.21025	1.05159	1.62361	0.6918	1.76817	0.8542	1.33731	-0.50982	-0.62608	-0.59371	-0.60864	-0.40964	-0.49348	2.40063	0.21149	1.00559	1.18647
803	113.322081296887	23.2377172546361	737596.782456831	2571735.70695326	0		0.93422	0.78905	-0.11597	0.42499	0.7288	-1.12898	-0.99874	-0.50982	-0.62608	-0.59371	-0.60864	-0.40964	-0.49348	1.56816	-0.26005	0.8007	0.70863
804	113.543010094674	23.0721154130085	760532.581211289	2553769.76734455	11	2.3979	0.97783	0.20775	-0.30471	-0.54961	-0.93396	0.8542	1.33731	-0.50982	-0.36086	-0.5787	-0.60864	0.03126	-0.49348	-0.45813	-0.09043	0.91934	-0.65524
805	113.223212286389	23.1669199395471	727596.78245683	2563735.70695326	0		0.11067	0.03603	-0.71806	-0.2423	-0.69937	-1.12898	-0.99874	-0.41734	0.10327	-0.20349	0.09689	-0.40964	-0.49348	-0.41531	-0.37808	-0.4177	-0.77933
806	113.281480160139	23.1480297524437	733596.782456831	2561735.70695326	15	2.70805	-1.12552	-0.74537	-1.17669	-0.71713	0.08655	1.03026	1.28127	0.50749	-0.02934	0.02164	-0.07949	1.35396	0.46232	-0.26917	-0.81025	-0.3975	-0.33311
807	113.475354884822	23.0728829819197	753596.782456831	2553735.70695326	0		2.86723	1.48758	0.75349	1.73872	1.92321	0.8542	1.33731	-0.50982	-0.62608	-0.59371	-0.60864	-0.40964	-0.49348	3.95728	0.24444	2.34751	1.61251
808	113.340985458165	23.2013247595544	739596.782456831	2567735.70695326	9	2.19722	-0.93458	-0.49573	-0.66009	0.15939	0.21147	-1.12898	-0.99874	-0.41734	-0.55978	-0.59371	-0.60864	0.03126	-0.49348	0.29199	-0.20663	0.15419	0.23395
809	113.445603116681	23.0462636480833	750596.782456829	2550735.70695326	4	1.38629	-0.47301	-0.538	-0.65737	-0.23432	-0.80909	-1.11886	-0.77389	-0.41734	-0.55978	-0.15846	-0.60864	0.47216	-0.17488	0.3169	0.94933	-0.86177	-0.51986
810	113.166675536005	23.294110027515	721596.78245683	2577735.70695326	0		0.03357	2.86446	2.03939	3.27409	2.98099	-1.12898	-0.99874	-0.50982	-0.62608	-0.59371	-0.60864	-0.40964	-0.49348	-0.13766	3.4351	3.80275	3.30379
811	113.410143217394	23.2454182202048	746596.78245683	2572735.70695326	0		0.93493	1.98767	0.9979	1.88017	-0.36324	-1.12898	-0.99874	-0.50982	-0.62608	-0.59371	-0.60864	-0.40964	-0.49348	0.99071	2.24643	2.72689	0.40474
812	113.416345991708	23.0467136442614	747596.78245683	2550735.70695326	0		-0.57147	-0.12741	-0.88069	-0.56299	-0.12197	-1.11886	-0.77389	0.04507	-0.52663	-0.50366	-0.25588	-0.40964	-0.49348	-0.21688	-0.17339	-0.48587	-0.17401
813	113.1571549216	23.2883273204238	720632.281594136	2577080.68420337	0		1.31074	2.62169	2.48341	4.15879	4.04974	-1.12898	-0.99874	-0.50982	-0.62608	-0.5787	-0.60864	-0.40964	-0.49348	1.57936	3.46711	5.45841	4.84033
814	113.26089939755	23.0851275599869	731596.782456829	2554735.70695326	1	0	-0.60528	-0.78644	-0.74087	-0.70613	-0.72741	0.96273	-0.43373	0.78494	2.49023	0.98218	1.50794	0.91306	0.78092	-0.62533	-0.90404	-0.67411	-0.98263
815	113.205317354253	23.2664857492696	725596.78245683	2574735.70695326	0		-0.26417	-0.64113	-0.88324	1.78843	-0.26333	-1.12898	-0.99874	-0.23238	-0.46032	0.24676	-0.43226	0.03126	0.14372	-0.04581	0.82698	-0.25427	0.27879
816	113.245001845845	23.3020362988262	729596.782456829	2578735.70695326	2	0.693147	2.38231	0.16844	0.54855	-0.40466	-0.69305	-1.12898	-0.99874	-0.50982	-0.46032	-0.56369	-0.60864	-0.40964	-0.49348	0.45043	1.22321	-0.18137	-0.51784
817	113.362635790706	22.9885539977917	742194.963196807	2544203.66634311	0		-0.21054	-0.25062	0.27663	-0.41248	-0.27555	-1.11886	-0.77389	-0.50982	-0.62608	-0.59371	-0.60864	-0.40964	-0.49348	0.16127	0.21705	-0.33108	-0.5206
818	113.526490910339	23.1984536542774	758596.782456831	2567735.70695326	0		-0.16994	-0.59706	0.96756	1.44899	0.43313	0.8542	1.33731	-0.50982	-0.62608	-0.59371	-0.60864	-0.40964	-0.49348	2.07327	1.03412	0.60713	0.70954
819	113.447565717984	23.1545643500085	750596.782456829	2562735.70695326	44	3.78419	1.37762	-0.05664	-0.17601	-0.83566	-0.76553	0.8542	1.33731	-0.32486	-0.36086	-0.47364	-0.43226	-0.40964	-0.17488	-0.83208	-0.42042	0.15561	-0.44813
820	113.25322051965	22.9961389558045	730961.693025652	2544867.16126159	0		1.13381	0.21932	1.84235	0.83933	1.31706	-1.11886	-0.77389	-0.50982	-0.62608	-0.59371	-0.60864	-0.40964	-0.49348	2.22694	-0.27954	0.31846	0.79669
821	113.535742879079	23.1712234558348	759596.782456829	2564735.70695326	0		0.2662	0.63966	1.76398	-0.91871	-0.75073	0.8542	1.33731	-0.32486	-0.55978	-0.53367	-0.07949	-0.40964	-0.17488	-0.16027	0.85243	1.33496	-0.36896
822	113.213098927124	23.0851627014961	726698.532846992	2554664.57557703	2	0.693147	-0.82762	-0.24996	-0.22794	0.38791	-0.05735	0.36414	-0.68004	-0.50982	-0.55978	-0.42861	-0.25588	0.03126	-0.49348	-0.71205	0.08534	-0.00431	-0.5631
823	113.213758087119	23.1851037377859	726597.95182369	2565734.98182259	0		-0.14073	0.56206	-0.3107	0.30406	-0.47254	-1.12898	-0.99874	-0.50982	-0.59293	-0.59371	-0.60864	-0.40964	-0.49348	1.39463	-0.55776	0.64411	0.02459
824	113.562469010801	23.0980881719639	762476.591289502	2556681.82861146	8	2.07944	-0.48115	-0.14838	2.09465	-0.42573	-0.40323	0.8542	1.33731	-0.50982	-0.62608	-0.59371	-0.60864	-0.40964	-0.49348	-0.01521	-0.18776	-0.23767	0.35591
825	113.436663887355	23.0915400676164	749596.782456829	2555735.70695326	1	0	-0.17586	-0.47769	-1.06273	-0.08179	0.43374	0.8542	1.33731	-0.23238	-0.52663	-0.59371	-0.60864	-0.40964	-0.49348	0.20354	-0.52537	-0.12651	-0.3057
826	113.481478813838	23.2503909780154	753889.2680549	2573409.65970813	0		3.10805	5.1624	-0.65565	0.89911	4.93743	-1.12898	-0.99874	-0.50982	-0.62608	-0.59371	-0.60864	-0.40964	-0.49348	1.01189	1.3912	0.8152	2.00283
827	113.378606040617	23.1195095153858	743596.78245683	2558735.70695326	3	1.09861	-0.46151	-0.49022	-0.36756	-0.801	-0.59626	0.96955	0.68404	0.13756	1.09783	0.93715	0.44965	0.03126	0.62162	-0.93688	-0.9918	-0.82745	-0.999
828	113.36916514759	23.1377075065858	742596.78245683	2560735.70695326	121	4.79579	-0.62045	0.11402	-1.00759	-0.6223	-0.97039	0.96955	0.68404	2.72707	1.03153	2.69314	1.50794	0.47216	1.25882	-0.36572	-0.46559	-0.93302	-0.81657
829	113.456339045687	23.1002626093057	751596.78245683	2556735.70695326	18	2.89037	-0.34181	-0.83609	-0.87385	-0.67373	-0.36262	0.8542	1.33731	1.15487	1.23044	1.26734	0.80242	2.67666	2.05532	-0.83373	-0.77675	-0.52745	-1.12069
830	113.178501429622	23.2312685424169	722911.249335801	2570793.60756442	0		0.62496	2.46097	1.59756	3.32758	0.31607	-1.12898	-0.99874	-0.50982	-0.62608	-0.59371	-0.60864	-0.40964	-0.49348	2.97366	0.20457	1.28041	1.53001
831	113.418609505303	23.1730670510017	747596.78245683	2564735.70695326	46	3.82864	-0.639	-0.92412	-0.97017	-1.04344	-0.78435	0.96955	0.68404	-0.41734	0.10327	-0.54868	-0.60864	-0.40964	-0.33418	-0.57521	-0.22776	0.31037	-0.82192
832	113.303478262303	23.2921597230041	735596.782456831	2577735.70695326	0		-0.69206	-0.9015	-1.15249	0.16404	-0.44959	-1.12898	-0.99874	0.59997	0.07011	1.14727	1.68433	0.91306	-0.17488	-0.50814	-0.83933	-0.79394	-0.4454
833	113.279499330288	23.0306897210918	733596.782456831	2548735.70695326	0		-0.50197	-0.26594	0.30048	-0.04925	0.48995	-1.11886	-0.77389	-0.50982	-0.55978	-0.59371	-0.60864	-0.40964	-0.33418	0.10759	-0.29744	-0.08577	0.1784
834	113.409818888936	23.2273679230156	746596.78245683	2570735.70695326	0		1.227	0.64679	0.37275	2.20193	1.20466	0.96955	0.68404	-0.41734	-0.62608	-0.5787	-0.60864	-0.40964	-0.49348	1.96617	1.17474	0.61879	0.60355
835	113.40037624738	23.2455678401505	745596.78245683	2572735.70695326	0		1.15656	2.48033	0.54116	1.46909	0.988	0.96955	0.68404	-0.50982	-0.62608	-0.59371	-0.60864	-0.40964	-0.49348	3.13779	2.16501	2.96007	1.44884
836	113.337189093007	22.984754106846	739592.100019388	2543740.95186793	7	1.94591	-0.73372	-0.81112	-0.56154	-0.6198	-0.15331	-1.11886	-0.77389	-0.50982	-0.59293	-0.5787	-0.60864	-0.40964	-0.49348	0.46081	-0.45779	-0.31185	0.00496
837	113.269526838226	22.9712857759582	732676.346497639	2542140.21121393	0		0.26216	-0.10165	2.36262	-0.28292	0.16605	-1.11886	-0.77389	-0.50982	-0.62608	-0.59371	-0.60864	-0.40964	-0.49348	0.55863	-0.06426	-0.3325	0.224
838	113.340671098861	23.1832734531946	739596.782456831	2565735.70695326	16	2.77259	-0.13269	0.07549	-0.97835	-0.31718	-0.48437	0.96955	0.68404	0.32252	0.43479	0.92214	-0.25588	0.03126	0.46232	-0.91899	-0.50246	-0.53881	-0.51253
839	113.390931224982	23.2637673637953	744596.78245683	2574735.70695326	0		3.16137	1.39523	0.62015	-0.37971	0.76628	-1.12898	-0.99874	-0.50982	-0.62608	-0.59371	-0.60864	-0.40964	-0.49348	1.50909	2.21398	1.90655	1.4245
840	113.378128935051	23.0924329941921	743596.78245683	2555735.70695326	12	2.48491	-0.24125	-0.28842	-0.64356	-0.84542	-0.42762	0.96273	-0.43373	-0.50982	-0.22826	-0.48865	-0.43226	-0.40964	-0.33418	-0.22969	-0.62367	-0.54849	-0.61044
841	113.357201320493	23.0114944995356	741596.78245683	2546735.70695326	44	3.78419	-0.42003	-0.28188	0.87135	-0.52181	-0.13662	-1.11886	-0.77389	-0.04741	0.36848	0.02164	-0.25588	-0.40964	-0.33418	-0.57659	-0.51338	-0.62725	-0.54902
842	113.254774016301	23.3018960186873	730596.782456829	2578735.70695326	1	0	0.58182	-0.3419	0.68516	-0.9091	0.68792	-1.12898	-0.99874	-0.50982	-0.55978	-0.48865	-0.43226	-0.40964	-0.33418	0.69408	0.75198	-0.13105	0.01891
843	113.225457277627	23.3023150344873	727596.78245683	2578735.70695326	0		0.79203	-0.13938	0.47684	-0.60999	-0.28152	-1.12898	-0.99874	-0.50982	-0.62608	-0.45863	-0.25588	-0.40964	-0.49348	-0.34591	2.24703	-0.06998	-0.10999
844	113.19480857767	23.221490216355	724596.78245683	2569735.70695326	0		0.46386	0.40143	0.21369	1.67785	-0.59779	-1.12898	-0.99874	-0.50982	-0.59293	-0.54868	-0.60864	-0.40964	-0.49348	1.1246	-0.62598	-0.39773	0.46312
845	113.486938768578	23.1720021911894	754596.782456831	2564735.70695326	1	0	-0.15395	-0.4897	0.45121	-0.61412	-0.92937	0.8542	1.33731	-0.23238	-0.1951	-0.3986	-0.07949	0.03126	0.14372	-0.91267	-0.67292	-0.91047	-0.68366
846	113.408686298382	23.1641915230882	746596.78245683	2563735.70695326	7	1.94591	-0.34813	-0.55076	-0.9948	-0.71579	-0.42401	0.96955	0.68404	0.13756	0.6337	1.58251	0.09689	-0.40964	2.37392	-0.21305	-0.77388	-0.77459	-0.69275
847	113.581011283344	23.1790293778637	764217.956890924	2565681.96626576	0		0.44259	-0.16307	1.03314	0.31762	-0.0693	0.8542	1.33731	-0.50982	-0.62608	-0.59371	-0.60864	-0.40964	-0.49348	-0.36914	2.12951	-0.5845	-0.39174
848	113.417961160792	23.1369663054739	747596.78245683	2560735.70695326	16	2.77259	0.0018	0.19956	-1.20028	-0.5828	-0.84966	0.96955	0.68404	-0.41734	-0.22826	-0.47364	-0.60864	-0.40964	-0.17488	-0.06063	-0.38957	0.03245	-0.67135
849	113.525812835327	23.1623559733276	758596.782456831	2563735.70695326	13	2.56495	-0.08566	0.4439	2.55051	-0.31837	0.05647	0.8542	1.33731	-0.32486	-0.32771	-0.20349	-0.07949	-0.40964	-0.01558	-0.56465	0.421	0.02728	-0.27618
850	113.438459839476	23.1908158687532	749596.782456829	2566735.70695326	5	1.60944	-0.59423	-0.86521	0.71188	-0.37102	-0.66479	0.8542	1.33731	-0.23238	-0.29456	-0.24851	-0.43226	-0.40964	-0.49348	-0.57449	-0.78354	-0.53876	-0.81474
851	113.487773923039	23.2171255553513	754596.782456831	2569735.70695326	0		0.17801	2.53476	-0.24493	1.3158	3.65351	0.8542	1.33731	-0.50982	-0.62608	-0.5787	-0.60864	-0.40964	-0.49348	-0.94886	-0.69204	2.98061	0.49732
852	113.312314265695	23.2378613546792	736596.782456831	2571735.70695326	4	1.38629	-0.40524	0.37013	-0.48784	0.19141	-0.53072	-1.12898	-0.99874	-0.41734	-0.55978	-0.56369	-0.60864	-0.40964	-0.49348	-0.43664	-0.25055	-0.28793	0.41346
853	113.334707135803	22.9777678493571	739349.886671008	2542963.0730177	1	0	-0.2975	-0.38658	-1.13823	-0.94644	-0.93183	-1.11886	-0.77389	-0.50982	-0.59293	-0.59371	-0.60864	-0.40964	-0.49348	0.44726	-0.65534	-0.24827	-0.22823
854	113.272176358348	23.1752491964191	732596.78245683	2564735.70695326	4	1.38629	-0.02446	-0.36119	-0.41826	-0.92482	0.13563	-1.12898	-0.99874	1.70976	1.13099	0.42687	0.09689	0.47216	-0.33418	-0.62301	-0.85177	-0.83409	-0.84598
855	113.427070472737	23.1007155885645	748596.782456829	2556735.70695326	0		-0.42735	-0.7197	-0.57324	-0.07795	-0.51959	0.8542	1.33731	0.13756	-0.22826	-0.36858	-0.43226	-0.40964	-0.49348	-0.77241	-0.77892	-0.30695	-0.65996
856	113.330595416641	23.1653669107901	738596.782456831	2563735.70695326	29	3.3673	-0.31696	-0.01771	-0.92522	-0.94265	-0.85341	0.96955	0.68404	0.32252	1.09783	0.83209	0.44965	0.03126	0.14372	-0.66016	-0.7108	-0.85392	-0.81656
857	113.222914228887	23.1488670687475	727596.78245683	2561735.70695326	0		-0.20732	-0.69393	-0.55656	-0.14071	-0.62319	0.36414	-0.68004	1.24735	0.66685	0.38184	0.9788	0.03126	0.46232	-0.96179	-0.81431	-0.81829	-0.96617
858	113.288794375262	23.0034703000075	734596.782456831	2545735.70695326	4	1.38629	-0.90378	-0.44509	-0.51966	-0.58444	-0.49509	-1.11886	-0.77389	-0.32486	-0.62608	-0.50366	-0.43226	-0.40964	-0.49348	0.22902	-0.51368	0.03976	0.16546
859	113.263630311634	23.2475988478139	731596.782456829	2572735.70695326	0		-0.14875	-1.04909	-0.1265	-0.44379	-0.45227	-1.12898	-0.99874	-0.23238	0.07011	0.11169	1.68433	0.03126	-0.33418	-0.17979	0.17228	-0.46297	-1.03091
860	113.293707134198	23.2923029819298	734596.782456831	2577735.70695326	3	1.09861	0.24707	0.0305	-0.8275	0.89346	-0.57393	-1.12898	-0.99874	-0.50982	-0.59293	-0.53367	-0.60864	-0.40964	-0.49348	-0.20199	-0.64402	-0.05253	-0.41989
861	113.367898391726	23.0655028939922	742596.78245683	2552735.70695326	0		-0.74278	-0.28949	-0.41482	-0.81593	-0.32397	0.96273	-0.43373	-0.50982	-0.49347	-0.53367	-0.60864	0.03126	-0.49348	-0.33203	-0.58797	0.00387	-0.34485
862	113.429023339271	23.2090170424888	748596.782456829	2568735.70695326	2	0.693147	-0.71846	0.03751	1.09247	0.46019	1.86395	0.8542	1.33731	-0.50982	-0.62608	-0.5787	-0.60864	-0.40964	-0.49348	1.25518	0.20573	0.67925	0.3157
863	113.288946705202	23.0124964961157	734596.782456831	2546735.70695326	5	1.60944	-0.16802	0.03865	-1.04519	0.13613	-0.85542	-1.11886	-0.77389	-0.41734	-0.1288	-0.35357	0.44965	0.03126	-0.49348	-0.75862	-0.97882	-0.8289	-0.71897
864	113.215535346945	23.2934271694661	726596.78245683	2577735.70695326	0		0.16361	0.29658	-0.37159	-0.60624	-0.53912	-1.12898	-0.99874	-0.50982	-0.59293	-0.56369	-0.60864	-0.40964	-0.49348	-0.80381	2.37927	0.44948	-0.27569
865	113.377176881578	23.03827964554	743596.78245683	2549735.70695326	0		-0.41677	-0.04716	-1.30506	-1.05759	-0.33623	-1.11886	-0.77389	-0.23238	-0.42717	-0.18848	-0.43226	-0.40964	-0.17488	-0.79821	0.21465	-0.72952	-0.8075
866	113.207197889355	23.1068680817989	726057.504871461	2557059.4767741	0		-0.29754	-0.77303	-0.53541	-0.88304	-0.7374	0.36414	-0.68004	-0.50982	-0.62608	-0.5787	-0.60864	-0.40964	-0.49348	-0.07311	-0.71543	-0.45094	-0.37962
867	113.485274738232	23.0817546028142	754596.782456831	2554735.70695326	0		0.30159	0.10531	0.10916	1.3129	1.09076	0.8542	1.33731	-0.50982	-0.62608	-0.59371	-0.60864	-0.40964	-0.49348	0.83658	-0.40634	0.33812	0.74053
868	113.439115376266	23.2269158171969	749596.782456829	2570735.70695326	0		-0.18922	0.55403	1.44438	2.16161	1.40878	0.8542	1.33731	-0.50982	-0.62608	-0.59371	-0.60864	-0.40964	-0.49348	0.08251	1.31446	0.0762	2.24342
869	113.418934166237	23.1911173552991	747596.78245683	2566735.70695326	61	4.11087	0.57852	-0.10526	-0.31793	-0.96128	-0.21	0.96955	0.68404	-0.13989	-0.1288	-0.26352	0.80242	0.03126	-0.33418	-1.03121	-0.62267	-0.93402	-0.80042
870	113.350907585519	23.210204666598	740596.78245683	2568735.70695326	0		-0.64157	-0.36775	-0.23421	0.65099	0.64004	0.96955	0.68404	-0.50982	-0.62608	-0.59371	-0.60864	-0.40964	-0.49348	1.14871	0.38849	0.50585	0.63257
871	113.437315812574	23.1276405187584	749596.782456829	2559735.70695326	3	1.09861	-0.54503	-0.3282	-0.29808	-0.18777	-0.77651	0.96955	0.68404	-0.32486	-0.1288	0.15671	0.62603	0.03126	0.46232	-0.22988	0.04873	-0.72661	-0.38713
872	113.26165550945	23.1302588396804	731596.782456829	2559735.70695326	8	2.07944	-0.75045	-0.78883	-0.92202	-1.10567	0.12982	1.03026	1.28127	2.72707	3.28588	1.0272	0.80242	0.91306	1.09952	-0.72335	-0.96542	-0.85616	-1.00527
873	113.273092418989	23.2294056554583	732596.78245683	2570735.70695326	1	0	-0.95345	-0.2988	-0.68893	-0.70896	-0.92318	-1.12898	-0.99874	0.23004	0.93207	3.29347	4.8592	0.03126	2.05532	-0.68383	-0.65553	-0.86539	-1.07863
874	113.253407260789	23.220660894554	730596.782456829	2569735.70695326	4	1.38629	-0.92999	-0.68667	-0.54379	0.31886	-0.85039	-1.12898	-0.99874	0.04507	0.23588	1.62754	1.15518	0.47216	1.89602	-0.83597	-0.54392	-0.80842	-0.89969
875	113.29032113291	23.0937317548146	734596.782456831	2555735.70695326	0		-0.21298	-0.76154	-1.34238	-1.08237	-0.91142	0.96273	-0.43373	1.98721	2.8549	0.29179	0.9788	2.23576	0.14372	-0.83069	-0.95504	-0.76631	-0.9809
876	113.436338416232	23.0734897736479	749596.782456829	2553735.70695326	0		0.34306	-0.09472	-0.66506	0.48835	0.71501	0.8542	1.33731	-0.50982	-0.62608	-0.59371	-0.60864	-0.40964	-0.49348	0.78822	-0.62694	0.09731	0.09163
877	113.475851015317	23.0999576131273	753596.782456831	2556735.70695326	39	3.66356	-0.38206	-0.86944	-1.16101	-0.51982	-0.16926	0.8542	1.33731	-0.04741	0.03696	-0.08342	-0.60864	0.03126	0.14372	-0.56627	-0.71473	-0.36675	-0.41197
878	113.188043581554	23.1565628188046	724012.471125868	2562534.00048484	0		0.63195	0.49941	0.88504	0.31063	0.63262	-1.12898	-0.99874	-0.50982	-0.62608	-0.59371	-0.60864	-0.40964	-0.49348	-0.1497	-0.16044	0.3572	0.75196
879	113.565709244876	23.2304778852455	762550.128040637	2571353.690634	0		-0.11182	-0.19007	0.74757	1.10143	0.03766	0.8542	1.33731	-0.50982	-0.62608	-0.59371	-0.60864	-0.40964	-0.49348	0.8474	1.43578	1.652	0.55738
880	113.360225416751	23.2804023205454	741424.274067646	2576526.84663075	0		-0.51221	0.83996	-0.122	-0.29181	-0.88563	-1.12898	-0.99874	-0.50982	-0.39402	-0.3986	-0.25588	-0.40964	-0.17488	-0.40788	0.25159	-0.79331	-0.94653
881	113.478342917214	23.2353292234194	753596.782456831	2571735.70695326	0		2.09281	5.06801	0.18222	1.58214	3.01435	0.8542	1.33731	-0.50982	-0.62608	-0.59371	-0.60864	-0.40964	-0.49348	0.41596	0.55175	2.16769	3.26208
882	113.54380033176	23.0808223683437	760596.782456829	2554735.70695326	5	1.60944	-0.17502	-0.66118	0.18252	-0.30455	-0.21126	0.8542	1.33731	-0.50982	-0.55978	-0.59371	-0.60864	-0.40964	-0.49348	-0.15977	-0.19634	1.06089	0.04603
883	113.408202119573	23.1371157520242	746596.78245683	2560735.70695326	12	2.48491	0.46866	-0.33508	-0.93347	-0.71484	-0.14955	0.96955	0.68404	-0.50982	0.30218	-0.3986	-0.25588	0.03126	-0.49348	-0.23443	-0.85994	0.39696	-0.76442
884	113.184794050826	23.061805842374	723836.818651774	2552033.97452981	0		-0.53967	0.44431	1.08649	-0.88128	-0.33185	0.36414	-0.68004	-0.50982	-0.59293	-0.59371	-0.60864	-0.40964	-0.49348	-0.12414	-0.57072	0.15923	-0.50043
885	113.261878106243	22.9719706969436	731890.728309107	2542203.96021826	0		-0.61094	-0.40833	2.60599	-0.04207	0.46105	-1.11886	-0.77389	-0.50982	-0.62608	-0.59371	-0.60864	-0.40964	-0.49348	0.18123	-0.29069	-0.81216	-0.38694
886	113.534723895295	23.1170770667535	759596.782456829	2558735.70695326	0		0.87054	-0.15904	2.6793	-0.08547	0.12389	0.8542	1.33731	-0.50982	-0.42717	-0.53367	-0.60864	-0.40964	-0.49348	0.62271	0.30396	0.01883	-0.17799
887	113.260295876	23.0490223337774	731596.782456829	2550735.70695326	0		1.78342	-0.53307	1.1616	-0.35807	-0.64154	0.36414	-0.68004	-0.32486	-0.39402	-0.36858	-0.25588	-0.40964	-0.49348	-0.86615	-0.5522	-0.21961	-0.44254
888	113.447073956961	23.1274893286033	750596.782456829	2559735.70695326	26	3.2581	0.81058	0.05238	-0.15375	-0.2204	-0.88202	0.96955	0.68404	-0.50982	-0.59293	-0.5787	-0.60864	-0.40964	-0.49348	0.3903	-0.4629	0.63801	-0.08291
889	113.457655294586	23.172462184255	751596.78245683	2564735.70695326	157	5.05625	-0.11415	-0.65317	-1.0857	-0.83657	-0.95522	0.8542	1.33731	-0.41734	0.26903	-0.12845	-0.60864	0.47216	-0.49348	-0.65859	-0.91944	-0.6757	-1.08613
890	113.213244328216	23.1215622455274	726652.293064128	2558696.36853473	0		0.06608	-0.54852	-0.97021	-0.39196	0.22479	0.36414	-0.68004	-0.41734	-0.22826	-0.41361	0.09689	-0.40964	-0.17488	-0.73921	-0.73349	-0.09972	-0.17439
891	113.281327328424	23.1390036638093	733596.782456831	2560735.70695326	40	3.68888	-0.48878	-0.88749	-1.0547	-1.00154	-0.33305	1.03026	1.28127	3.6519	4.01523	1.13226	2.21347	4.44026	1.57742	-0.85375	-0.86614	-0.84602	-1.02451
892	113.506460666339	23.171692508979	756596.782456831	2564735.70695326	4	1.38629	-0.48261	-0.70928	1.22362	-0.3978	-0.42021	0.8542	1.33731	0.13756	0.83262	1.32737	0.80242	0.47216	2.21462	-1.11969	-0.81691	-0.87439	-0.77392
893	113.185851570664	23.2578407117422	723619.257985266	2573748.02252012	0		2.33079	0.94483	0.56995	3.54446	1.7312	-1.12898	-0.99874	-0.50982	-0.62608	-0.59371	-0.60864	-0.40964	-0.49348	3.1941	1.02785	2.68937	2.14535
894	113.301155740352	23.1567717715303	735596.782456831	2562735.70695326	0		-1.01904	-0.72467	-0.75865	-0.68202	-0.73346	1.03026	1.28127	0.415	0.53425	-0.0384	0.09689	-0.40964	-0.49348	-0.51565	-0.89302	-0.49115	-0.83971
895	113.524798273525	23.1082091068319	758596.782456831	2557735.70695326	0		-1.1496	-0.49099	1.99083	0.53151	-0.22089	0.8542	1.33731	-0.41734	-0.42717	-0.56369	-0.60864	-0.40964	-0.33418	0.19223	0.15921	-0.46551	-0.01216
896	113.398282418338	23.1282392509669	745596.78245683	2559735.70695326	41	3.71357	-0.34013	-0.31625	-1.05774	-0.2901	-0.91784	0.96955	0.68404	1.70976	3.02066	1.3724	0.62603	0.03126	1.41812	-0.03116	-0.78367	-0.95638	-0.75578
897	113.231480956596	23.0765175722157	728596.78245683	2553735.70695326	0		-0.35905	-0.55197	-0.58896	-0.05974	-0.74725	0.36414	-0.68004	0.415	1.46251	1.22231	1.15518	0.03126	0.46232	-0.66066	-0.93527	-0.76245	-0.76182
898	113.311226927215	23.1746805865549	736596.782456831	2564735.70695326	0		-0.52547	0.22101	-0.85064	-0.47439	0.23123	0.96955	0.68404	-0.41734	-0.62608	-0.5787	-0.60864	-0.40964	-0.49348	0.35131	-0.55483	0.01951	-0.10559
899	113.529324667964	23.0483766458449	759175.366877389	2551115.73617017	0		3.19556	-0.42747	-0.44593	-0.70082	-0.17549	0.8542	1.33731	-0.50982	-0.62608	-0.59371	-0.60864	-0.40964	-0.49348	0.09815	-0.72173	-0.38684	0.03645
900	113.21367696031	23.1760557411136	726604.893624471	2564732.70225051	1	0	-0.2699	-0.57535	-0.52219	0.50371	0.43843	-1.12898	-0.99874	-0.32486	-0.22826	-0.53367	-0.07949	-0.40964	-0.49348	-0.271	-0.64551	-0.32263	-0.48564
901	113.292471533859	23.2200958967517	734596.782456831	2569735.70695326	2	0.693147	-0.13229	-0.10513	-1.11089	-0.95572	-0.55611	-1.12898	-0.99874	0.32252	1.82718	1.41742	0.9788	0.91306	2.05532	-0.97999	-0.78633	-0.79165	-1.0162
902	113.288332917871	22.9703088913727	734606.78506021	2542061.96622826	0		0.52861	-0.11685	1.92359	-0.93348	-0.6977	-1.11886	-0.77389	-0.50982	-0.62608	-0.59371	-0.60864	-0.40964	-0.49348	0.32544	0.21665	-0.04967	0.0601
903	113.387406626244	23.0652092466517	744596.78245683	2552735.70695326	11	2.3979	-0.94275	-0.6609	-1.34477	-1.16197	0.12682	0.96273	-0.43373	-0.23238	0.03696	0.15671	0.80242	0.47216	0.30302	-0.34846	-0.63445	-0.43229	-0.40064
904	113.262869247074	23.2024683012511	731596.782456829	2567735.70695326	2	0.693147	-0.13873	-0.43679	-1.26446	-1.04948	-0.78333	-1.12898	-0.99874	1.15487	1.49566	1.17729	0.44965	0.47216	0.46232	-0.84723	-0.98923	-0.8909	-0.84802
905	113.360672335604	23.2100583321361	741596.78245683	2568735.70695326	0		-0.54686	0.12358	-0.75656	-0.08136	-0.73902	0.96955	0.68404	-0.32486	-0.39402	-0.32356	-0.43226	-0.40964	-0.49348	-0.8999	0.13041	0.05466	-0.64241
906	113.439443638153	23.2449657227169	749596.782456829	2572735.70695326	0		1.93138	1.93564	0.29322	0.91387	-0.28752	-1.12898	-0.99874	-0.50982	-0.62608	-0.59371	-0.60864	-0.40964	-0.49348	-0.70281	2.42512	2.33703	2.02335
907	113.349488862547	23.128974100781	740596.78245683	2559735.70695326	59	4.07754	-1.20043	-0.62036	-1.31296	-1.17146	-0.55198	0.96955	0.68404	0.78494	2.62284	-0.2335	0.09689	2.67666	0.30302	-0.19002	-0.86258	-0.82553	-0.62084
908	113.496364978632	23.1537983601685	755596.782456831	2562735.70695326	2	0.693147	-0.43908	0.7585	1.53272	-1.12532	-1.02646	0.8542	1.33731	-0.32486	-0.09565	-0.48865	-0.60864	-0.40964	-0.33418	-0.87097	0.085	-0.74131	-0.52172
909	113.177024939964	23.307969434754	722632.536652587	2579286.6439668	0		0.8733	1.31041	2.12939	1.94032	1.21	-1.12898	-0.99874	-0.50982	-0.62608	-0.59371	-0.60864	-0.40964	-0.49348	0.17986	3.33842	1.35677	0.94908
910	113.447729803084	23.1635893342853	750596.782456829	2563735.70695326	113	4.72739	-0.04468	-0.68	-0.14661	-1.13422	-0.92327	0.8542	1.33731	-0.32486	1.06468	-0.26352	-0.43226	0.47216	-0.49348	-0.85655	-0.95933	-0.74185	-0.54595
911	113.494862621489	23.072575978965	755596.782456831	2553735.70695326	0		0.36438	-0.08113	1.04666	1.45677	1.00651	0.8542	1.33731	-0.50982	-0.62608	-0.59371	-0.60864	-0.40964	-0.49348	1.98583	-0.39546	0.83828	1.68332
912	113.377652548918	23.065356370877	743596.78245683	2552735.70695326	59	4.07754	-0.63991	-0.90979	-0.82895	-0.7568	-0.23055	0.96273	-0.43373	-0.50982	0.07011	-0.54868	-0.43226	-0.40964	-0.33418	-0.6423	-0.98232	-0.54795	-0.75551
913	113.166907212254	23.285276667645	721635.121768177	2576757.69113018	0		0.00499	3.28753	1.73746	3.41385	2.9574	-1.12898	-0.99874	-0.50982	-0.62608	-0.59371	-0.60864	-0.40964	-0.49348	0.79309	3.01786	4.77222	4.25725
914	113.57538483251	23.2159176019161	763569.30506577	2569758.23676118	7	1.94591	1.52602	0.91905	0.02986	0.42694	-0.67883	0.8542	1.33731	-0.50982	-0.55978	-0.59371	-0.60864	-0.40964	-0.49348	-0.16446	2.38766	0.86509	0.61177
915	113.485939346895	23.117853775608	754596.782456831	2558735.70695326	7	1.94591	0.80807	1.00105	0.00813	0.58416	0.3573	0.8542	1.33731	-0.50982	-0.59293	-0.59371	-0.60864	-0.40964	-0.49348	1.26791	0.16762	1.33233	1.62381
916	113.339104030415	23.0930162409436	739596.782456831	2555735.70695326	10	2.30259	-0.31621	0.35535	-1.14154	-0.83188	-0.22452	0.96273	-0.43373	0.59997	0.20272	-0.35357	-0.43226	0.47216	-0.17488	0.20627	-0.75448	-0.3903	-0.47082
917	113.410305503605	23.2544433516492	746596.78245683	2573735.70695326	0		2.12009	1.27583	1.52683	1.25825	0.72942	-1.12898	-0.99874	-0.50982	-0.62608	-0.59371	-0.60864	-0.40964	-0.49348	1.61802	2.79134	1.30103	1.14411
918	113.532526009604	23.0549212735325	759490.995813533	2551846.40297592	6	1.79176	2.8615	-0.37145	-0.75084	-0.52837	-0.83523	0.8542	1.33731	-0.41734	-0.42717	-0.59371	-0.60864	-0.40964	-0.49348	-0.59606	-0.58835	0.12178	-0.75654
919	113.545410918126	23.1711413374667	760587.159334231	2564743.89833613	0		0.66616	1.46094	1.4175	-0.10631	-0.2604	0.8542	1.33731	-0.41734	-0.62608	-0.59371	-0.60864	-0.40964	-0.49348	0.0022	1.40441	2.10844	-0.1305
920	113.399086120577	23.1733658594299	745596.78245683	2564735.70695326	0		0.34593	-0.0594	-0.25869	-0.29178	-0.57355	0.96955	0.68404	-0.13989	-0.32771	0.71202	0.44965	-0.40964	-0.17488	0.06945	-0.44328	-0.90609	-0.90229
921	113.34792001274	23.0387168396579	740596.78245683	2549735.70695326	2	0.693147	0.51389	-0.42295	0.03584	0.86033	0.35336	-1.11886	-0.77389	-0.41734	-0.55978	-0.5787	-0.60864	-0.40964	-0.49348	0.21758	-0.54171	0.04202	-0.28858
922	113.574348520857	23.1882657392397	763517.459739152	2566693.07802201	4	1.38629	0.08033	-0.63465	0.16407	-0.46996	-0.90232	0.8542	1.33731	-0.50982	-0.52663	-0.06841	0.44965	-0.40964	-0.49348	-0.47019	2.80798	-0.39062	-0.09709
923	113.495029214493	23.0816007338019	755596.782456831	2554735.70695326	0		-0.89915	-0.73381	0.46054	1.84215	0.63493	0.8542	1.33731	-0.04741	-0.1951	-0.48865	-0.60864	0.47216	-0.49348	-0.30964	-0.90428	-0.47463	0.54401
924	113.282552133952	23.2112120566293	733596.782456831	2568735.70695326	2	0.693147	-1.21756	-0.74479	-0.61099	-1.06494	-0.65703	-1.12898	-0.99874	0.69245	1.36305	3.59364	2.38985	1.35396	0.78092	-0.87411	-1.05483	-0.95271	-0.95794
925	113.2511430073	23.0852669896051	730596.782456829	2554735.70695326	2	0.693147	-0.83888	-0.87485	-0.56228	-0.89176	-0.25939	0.36414	-0.68004	0.415	1.13099	0.03665	-0.07949	0.03126	1.09952	-0.52597	-0.78361	-0.53498	-0.50283
926	113.252801790953	23.1845561011707	730596.782456829	2565735.70695326	3	1.09861	-0.83775	-0.85087	-1.19137	-0.64367	-0.89782	-1.12898	-0.99874	2.81956	2.29131	2.31793	2.74262	0.03126	3.01113	-0.77833	-0.61429	-0.82801	-0.69737
927	113.342088202667	23.264503973846	739596.782456831	2574735.70695326	0		-0.06828	-0.30404	-0.32298	-0.32754	-0.29854	-1.12898	-0.99874	-0.50982	-0.62608	-0.56369	-0.60864	-0.40964	-0.49348	0.20718	0.25108	-0.08608	0.48073
928	113.23252583736	23.1397026330486	728596.78245683	2560735.70695326	0		-0.71606	-0.31971	-0.75005	-0.87265	-0.60415	0.36414	-0.68004	1.15487	0.50109	0.33681	0.09689	0.47216	0.30302	-1.02983	-0.73062	-0.83908	-0.66102
929	113.349331622227	23.1199484256238	740596.78245683	2558735.70695326	7	1.94591	-1.02431	-0.42578	-1.25081	-0.88092	-0.53271	0.96955	0.68404	0.78494	1.79403	0.56194	-0.25588	0.03126	0.14372	-0.93982	-0.86819	-0.96263	-0.81126
930	113.302857214078	23.2560565187307	735596.782456831	2573735.70695326	6	1.79176	0.00697	-0.39943	-1.08806	-0.7879	-0.44187	-1.12898	-0.99874	-0.32486	0.03696	0.29179	0.44965	-0.40964	-0.17488	-0.35482	-0.19376	-0.45846	-0.42398
931	113.260597484884	23.0670749693601	731596.782456829	2552735.70695326	7	1.94591	-0.37198	-0.12439	-0.18481	0.06214	-0.39199	0.36414	-0.68004	-0.04741	-0.59293	-0.47364	-0.60864	-0.40964	-0.49348	0.4519	-0.64659	-0.22317	-0.30879
932	113.358932028546	23.1107771017656	741596.78245683	2557735.70695326	4	1.38629	-0.85894	-0.80608	-0.72078	-0.50931	-1.04048	0.96273	-0.43373	0.23004	0.23588	0.80208	0.44965	0.03126	-0.49348	-0.31761	-0.74139	-0.68673	-0.5054
933	113.359247733115	23.1288283367428	741596.78245683	2559735.70695326	56	4.02535	-0.29473	-0.85263	-0.86335	-0.87274	-0.01988	0.96955	0.68404	1.89473	0.50109	-0.09843	-0.25588	0.91306	-0.17488	-0.62055	-0.76756	-0.92227	-1.09111
934	113.524123597107	23.0721109661383	758596.782456831	2553735.70695326	10	2.30259	0.32839	-0.6316	-0.70756	-0.37619	0.02843	0.8542	1.33731	-0.23238	-0.36086	-0.41361	-0.07949	-0.40964	-0.49348	-0.85199	-0.88637	-0.72327	-0.78732
935	113.301618847552	23.1838495657482	735596.782456831	2565735.70695326	0		-0.87802	-0.09034	-0.1239	0.64844	2.08783	-1.12898	-0.99874	-0.50982	-0.62608	-0.59371	-0.60864	-0.40964	-0.49348	1.68825	0.13716	-0.25658	1.58632
936	113.471349998147	23.0573036604929	753215.490776265	2552002.99786013	0		2.60684	1.20874	1.39935	1.48283	0.71472	-1.11886	-0.77389	-0.50982	-0.62608	-0.59371	-0.60864	-0.40964	-0.49348	1.10396	1.11074	1.02221	0.73424
937	113.368531132587	23.1016052910269	742596.78245683	2556735.70695326	23	3.13549	-0.74409	-0.7362	-1.02183	-0.92205	0.6464	0.96273	-0.43373	-0.32486	0.43479	-0.36858	-0.60864	2.67666	-0.33418	-0.80514	-0.88202	-0.71053	-0.72407
938	113.248961481046	23.0436318341202	730444.187491808	2550120.7473307	0		-0.33623	-0.6149	1.4098	-0.4668	0.48631	0.36414	-0.68004	-0.50982	-0.62608	-0.5787	-0.60864	-0.40964	-0.49348	0.56617	-0.62507	0.97142	-0.02927
939	113.544821173265	23.1349686235931	760596.782456829	2560735.70695326	24	3.17805	2.27848	-0.05603	3.71396	-0.5726	-0.89108	0.8542	1.33731	-0.50982	-0.42717	-0.59371	-0.60864	-0.40964	-0.49348	-0.65128	0.96235	0.03187	0.60918
940	113.185943504536	23.2486132003942	723644.06788599	2572726.13332298	0		0.89878	1.80746	1.06202	4.03269	0.50733	-1.12898	-0.99874	-0.50982	-0.62608	-0.59371	-0.60864	-0.40964	-0.49348	4.44857	0.51645	1.42146	1.6682
941	113.366611934863	22.9933783147103	742594.09572895	2544744.61115682	0		-0.80084	-0.76843	0.5775	-0.90852	-0.89723	-1.11886	-0.77389	-0.50982	0.07011	0.41186	0.27327	-0.40964	-0.01558	-0.96645	0.18934	-0.6586	-0.96596
942	113.58262743112	23.2252146083135	764292.556549858	2570801.33433874	5	1.60944	0.48743	1.4426	0.48785	1.44529	-0.08956	0.8542	1.33731	-0.50982	-0.62608	-0.59371	-0.60864	-0.40964	-0.49348	1.23462	2.214	1.64674	1.66798
943	113.524629477151	23.0991845888726	758596.782456831	2556735.70695326	1	0	-0.07498	0.28621	1.2904	0.06433	-0.009	0.8542	1.33731	-0.50982	-0.39402	-0.5787	-0.60864	-0.40964	-0.49348	0.57745	-0.1002	-0.07302	-0.28612
944	113.240937685843	23.0583265512856	729596.782456829	2551735.70695326	0		-0.38915	-0.5662	0.21527	-1.04769	-0.49711	0.36414	-0.68004	-0.41734	-0.39402	-0.06841	-0.43226	-0.40964	-0.49348	-0.62197	-0.79417	-0.43547	0.07495
945	113.477843034676	23.2082551077963	753596.782456831	2568735.70695326	0		1.43864	1.87048	-0.15049	0.44092	1.74503	0.8542	1.33731	-0.50982	-0.55978	-0.5787	-0.60864	-0.40964	-0.49348	-0.09517	-0.39624	1.6145	1.37003
946	113.222467703867	23.1217876782544	727596.78245683	2558735.70695326	4	1.38629	-0.06559	-0.58186	-0.44445	-0.56936	-0.76965	0.36414	-0.68004	0.04507	0.16957	0.50191	0.80242	-0.40964	-0.01558	-0.91455	-0.75846	-0.64416	-0.75278
947	113.533707980193	23.062930263856	759596.782456829	2552735.70695326	45	3.80666	2.68339	-0.85146	-1.13936	-1.05499	-0.58576	0.8542	1.33731	0.59997	0.89892	-0.12845	-0.43226	0.91306	-0.33418	-0.6713	-0.5766	-0.60092	-0.41677
948	113.332633826645	23.2827007026599	738596.782456831	2576735.70695326	0		1.01115	0.19508	0.86175	0.46322	-0.90819	-1.12898	-0.99874	-0.04741	-0.36086	-0.35357	-0.25588	-0.40964	-0.49348	0.25266	-0.46	-0.35218	-0.0432
949	113.30906368728	23.0483173871419	736596.782456831	2550735.70695326	1	0	0.29221	-0.25194	0.79056	-0.15573	-0.06088	0.96273	-0.43373	-0.41734	-0.36086	-0.41361	-0.60864	-0.40964	-0.49348	-0.39032	-0.43005	-0.74319	-0.28961
950	113.35688767515	22.9934429703049	741596.78245683	2544735.70695326	2	0.693147	-0.82374	0.25931	0.27289	-0.64036	-0.70409	-1.11886	-0.77389	0.415	0.26903	-0.17347	0.09689	-0.40964	-0.33418	-0.86269	-0.22466	-0.68312	-0.80198
951	113.223510643424	23.1849727653565	727596.78245683	2565735.70695326	0		-0.21646	-0.10373	-0.72516	-0.15385	-0.72411	-1.12898	-0.99874	-0.32486	-0.1288	-0.27853	-0.43226	0.47216	-0.33418	-0.18743	-1.01127	-0.70417	-0.86973
952	113.361625651123	23.2642111505492	741596.78245683	2574735.70695326	8	2.07944	1.14383	0.09344	-1.01767	1.20693	-0.50565	-1.12898	-0.99874	-0.50982	-0.29456	-0.29354	-0.07949	-0.40964	-0.49348	-0.07207	1.17071	-0.6081	-0.63123
953	113.319901285387	23.1113560362883	737596.782456831	2557735.70695326	4	1.38629	-0.74933	-0.97652	-0.50072	-0.85892	-0.16928	1.03026	1.28127	-0.23238	0.76631	-0.33856	-0.43226	0.03126	0.94022	-0.15141	-0.8266	-0.44574	-0.65402
954	113.458811357532	23.2356362113992	751596.78245683	2571735.70695326	0		3.98225	3.06669	0.40382	0.9991	1.37962	0.8542	1.33731	-0.50982	-0.62608	-0.59371	-0.60864	-0.40964	-0.49348	3.13765	1.25053	2.1147	2.50917
955	113.214341771674	23.221216199277	726596.78245683	2569735.70695326	1	0	0.27793	-0.35861	-0.89515	0.74757	-0.73203	-1.12898	-0.99874	-0.13989	-0.29456	-0.30855	-0.43226	-0.40964	-0.01558	0.06764	-0.76472	-0.51435	-0.51094
956	113.259999947503	22.9947582157621	731659.213780482	2544724.93243476	0		0.21291	-0.29203	1.45924	0.34645	0.4658	-1.11886	-0.77389	-0.50982	-0.59293	-0.59371	-0.60864	-0.40964	-0.49348	1.21361	-0.57887	0.0182	0.22232
957	113.446256001386	23.0823640645678	750596.782456829	2554735.70695326	0		0.28275	-0.23604	-0.13206	-0.07662	1.2171	0.8542	1.33731	-0.50982	-0.62608	-0.5787	-0.60864	-0.40964	-0.49348	2.18751	-0.91443	-0.24285	0.77091
958	113.321456872296	23.2016142760802	737596.782456831	2567735.70695326	0		-0.17163	-0.83379	-1.13643	-0.83915	-0.52838	-1.12898	-0.99874	0.87742	0.10327	0.56194	0.44965	-0.40964	-0.33418	-0.84048	-0.69704	-0.43248	-0.92581
959	113.554065366616	23.1077370514117	761596.689779174	2557735.61516999	2	0.693147	-0.26223	-0.39262	2.36354	-0.63143	-0.79187	0.8542	1.33731	0.23004	0.23588	1.71759	0.27327	0.03126	0.94022	-0.23826	-0.18692	-0.73893	-0.74362
960	113.331534569866	23.2195212071004	738596.782456831	2569735.70695326	4	1.38629	-0.74713	-0.1955	0.20161	-0.10474	0.21924	-1.12898	-0.99874	-0.23238	-0.49347	-0.53367	-0.43226	0.03126	0.30302	-0.15	0.30962	-0.36436	0.0621
961	113.386293314677	23.0020305106314	744596.78245683	2545735.70695326	5	1.60944	0.38135	-0.50727	-0.9091	-0.85361	-0.00713	-1.11886	-0.77389	0.59997	0.96522	1.34238	0.9788	2.67666	1.25882	-0.51104	-0.20073	-0.89573	-0.78641
962	113.378765235791	23.1285349997395	743596.78245683	2559735.70695326	167	5.11799	-0.97638	-0.96771	-0.82738	-0.90503	-0.70246	0.96955	0.68404	3.28197	2.42392	6.07003	3.62453	2.23576	4.60413	-0.48439	-0.78228	-0.9337	-0.85094
963	113.231183094457	23.0584645966651	728596.78245683	2551735.70695326	0		-0.66353	-0.92515	0.02904	-0.39303	-0.56499	0.36414	-0.68004	0.23004	0.26903	0.39685	1.15518	-0.40964	-0.01558	-0.67735	-0.6998	-0.69438	-0.76794
964	113.445277167043	23.0282133715042	750596.782456829	2548735.70695326	0		-0.03172	-0.17645	-0.17771	-0.40767	0.20898	-1.11886	-0.77389	-0.50982	-0.62608	-0.59371	-0.60864	-0.40964	-0.49348	1.53504	0.59582	0.31821	0.55244
965	113.525136120967	23.1262581082999	758596.782456831	2559735.70695326	0		0.8136	0.42931	2.52631	-0.74575	-0.93109	0.8542	1.33731	-0.50982	-0.55978	-0.59371	-0.60864	-0.40964	-0.49348	-0.73128	1.03914	0.50539	0.13266
966	113.536423909134	23.2073208182563	759596.782456829	2568735.70695326	2	0.693147	-0.35193	0.22168	0.43526	0.73296	-0.57904	0.8542	1.33731	-0.41734	-0.59293	-0.41361	-0.43226	-0.40964	-0.49348	-0.85047	1.56877	-0.57243	0.35601
967	113.185344135706	23.2396721732562	723597.639625531	2571734.91021054	0		-0.52006	2.25209	1.54163	3.45749	-0.11155	-1.12898	-0.99874	-0.50982	-0.62608	-0.59371	-0.60864	-0.40964	-0.49348	2.87337	0.10317	0.44518	0.94203
968	113.565885631065	23.2158696119196	762596.78245683	2569735.70695326	5	1.60944	-0.3763	0.13816	-0.36426	-0.15538	-0.35696	0.8542	1.33731	-0.50982	-0.52663	-0.5787	-0.60864	-0.40964	-0.49348	-0.31729	1.97121	-0.142	-0.50403
969	113.429186609837	23.218042089398	748596.782456829	2569735.70695326	0		-0.59942	-0.14645	1.646	1.26047	2.61397	0.8542	1.33731	-0.50982	-0.62608	-0.59371	-0.60864	-0.40964	-0.49348	1.29386	0.75675	0.60112	1.59179
970	113.387725436639	23.0832602120452	744596.78245683	2554735.70695326	0		-0.49777	-0.63066	-0.61443	-0.06478	0.31824	0.96273	-0.43373	-0.41734	-0.52663	-0.42861	-0.43226	-0.40964	-0.49348	0.38573	-0.37186	-0.27709	0.77516
971	113.523095753144	23.045417919129	758542.466687759	2550776.95231499	0		3.02053	-0.08555	-0.23801	-0.81052	-0.56478	0.8542	1.33731	-0.32486	-0.55978	-0.5787	-0.60864	-0.40964	-0.49348	-0.52801	-0.64863	-0.20991	0.37102
972	113.398925218611	23.164340560516	745596.78245683	2563735.70695326	7	1.94591	0.56408	0.20491	-0.73174	-0.95071	-0.92741	0.96955	0.68404	-0.23238	-0.09565	0.77206	0.09689	-0.40964	-0.33418	-0.55067	-0.84513	-0.4622	-0.86125
973	113.233874666923	23.2209397586265	728596.78245683	2569735.70695326	3	1.09861	-0.21544	-0.64497	0.01395	0.99642	-0.53492	-1.12898	-0.99874	-0.04741	-0.29456	0.42687	0.44965	-0.40964	-0.33418	-0.79809	-0.48364	-0.81803	-0.36576
974	113.318971679784	23.0572005495357	737596.782456831	2551735.70695326	13	2.56495	-0.59105	-0.76924	-0.18566	-0.62053	-0.38367	0.96273	-0.43373	-0.13989	0.36848	0.44187	0.27327	1.79486	0.30302	-0.47128	-0.94067	-0.78809	-0.91208
975	113.280107436927	23.0667945488186	733596.782456831	2552735.70695326	0		-1.09381	-0.88142	0.00489	-0.76478	-0.61428	0.96273	-0.43373	1.15487	1.03153	3.1584	0.62603	-0.40964	2.69253	-0.76725	-0.76101	-0.69868	-1.02041
976	113.573119965952	23.1975544881846	763373.430633069	2567719.85855523	7	1.94591	-0.83768	-0.00961	-0.38613	-0.10022	-0.57286	0.8542	1.33731	-0.50982	-0.46032	-0.3986	-0.25588	-0.40964	-0.49348	-0.69247	3.07885	-0.60065	0.07795
977	113.327168004093	22.97601964395	738579.762539603	2542757.14965106	11	2.3979	-0.54884	-0.46633	-0.90791	-0.28133	-0.87587	-1.11886	-0.77389	-0.32486	-0.02934	0.1267	-0.60864	-0.40964	-0.17488	-0.73387	-0.43667	-0.74074	-0.87649
978	113.223659934323	23.1939991613808	727596.78245683	2566735.70695326	0		-0.80362	-0.50437	-0.84005	-0.54734	-0.54723	-1.12898	-0.99874	-0.23238	0.50109	0.60697	1.68433	-0.40964	-0.49348	-0.53097	-0.67236	-0.6727	-0.38689
979	113.331064639736	23.1924441100028	738596.782456831	2566735.70695326	5	1.60944	-0.80429	-0.09404	-1.15622	-0.96344	-0.09283	-1.12898	-0.99874	1.15487	1.56196	2.453	2.03709	0.03126	0.62162	-0.16475	-0.69333	-0.87335	-0.8336
980	113.447237794947	23.1365143471638	750596.782456829	2560735.70695326	2	0.693147	-0.42622	-0.70585	-0.68542	-0.65974	-0.53718	0.96955	0.68404	-0.50982	-0.42717	-0.27853	0.09689	-0.40964	-0.33418	0.03534	-0.50582	-0.35629	0.43246
981	113.278740918257	22.9855584335562	733596.782456831	2543735.70695326	0		-0.60604	-0.22263	1.06175	-0.47782	-0.51775	-1.11886	-0.77389	-0.04741	0.43479	-0.20349	-0.60864	0.03126	-0.01558	-0.85918	-0.65923	-0.86553	-0.96102
982	113.17768456363	23.0773067326244	723082.60964259	2553739.92743531	0		0.38682	1.71682	1.53664	-0.45857	0.83362	0.36414	-0.68004	-0.50982	-0.62608	-0.59371	-0.60864	-0.40964	-0.49348	1.34991	0.00233	0.60262	0.70738
983	113.269595801494	23.0218036911206	732596.78245683	2547735.70695326	0		-0.19764	0.49459	0.46566	0.78561	0.24038	-1.11886	-0.77389	-0.50982	-0.55978	-0.5787	-0.60864	-0.40964	-0.49348	1.42341	-0.546	1.48052	1.101
984	113.195103899835	23.2395432640129	724596.78245683	2571735.70695326	0		0.72847	1.45179	1.04581	2.96712	-0.71208	-1.12898	-0.99874	-0.50982	-0.55978	-0.56369	-0.60864	-0.40964	-0.17488	1.14541	-0.21757	-0.29254	0.06436
985	113.348233151426	23.0567683824008	740596.78245683	2551735.70695326	0		0.33607	-0.60575	0.39908	0.64075	-0.21201	0.96273	-0.43373	-0.50982	-0.62608	-0.59371	-0.60864	0.03126	-0.49348	-1.07625	0.25956	0.10006	0.03553
986	113.386452118918	23.0110560783326	744596.78245683	2546735.70695326	11	2.3979	-0.81241	-0.48874	-0.42929	-0.30248	-0.74927	-1.11886	-0.77389	0.13756	1.23044	1.25233	1.86071	-0.40964	0.14372	-1.04268	-0.75609	-0.94532	-0.66599
987	113.310607304304	23.1385770413072	736596.782456831	2560735.70695326	42	3.73767	-0.6357	-0.53616	-0.90194	-1.14921	-0.29711	1.03026	1.28127	2.54211	3.94892	0.27678	0.80242	2.67666	2.53322	-0.72349	-0.78346	-0.90593	-1.01129
988	113.1984493269	23.2072003564317	724993.42037092	2568158.60868682	0		-0.18589	0.25745	-0.61016	0.72588	0.73236	-1.12898	-0.99874	-0.50982	-0.62608	-0.59371	-0.60864	-0.40964	-0.49348	0.29182	-0.08402	0.71271	1.20436
989	113.47634789488	23.1270321414196	753596.782456831	2559735.70695326	0		-0.01778	0.7445	0.36213	0.87177	0.27947	0.8542	1.33731	-0.50982	-0.62608	-0.59371	-0.60864	-0.40964	-0.49348	0.1791	0.13756	1.41571	1.00966
990	113.281786054005	23.1660818958462	733596.782456831	2563735.70695326	19	2.94444	-0.83016	-0.46228	-0.86834	-0.5664	0.15221	-1.12898	-0.99874	0.23004	-0.1288	-0.35357	-0.60864	-0.40964	-0.33418	-0.0826	-0.70521	-0.26465	-0.39732
991	113.416829689535	23.0737895620914	747596.78245683	2553735.70695326	0		-0.5372	-0.6134	-0.84187	-0.85662	1.02462	0.8542	1.33731	-0.13989	-0.22826	0.29179	-0.25588	-0.40964	0.46232	-0.9532	-0.62914	-0.55122	-1.09481
992	113.213900332986	23.1941402450621	726597.280464517	2566736.08517089	0		0.8296	-0.09516	-0.54575	-0.42893	-0.44451	-1.12898	-0.99874	-0.50982	-0.42717	-0.50366	-0.43226	-0.40964	-0.49348	0.34242	-0.90461	-0.22025	-0.53413
993	113.52615170265	23.1804048368273	758596.782456831	2565735.70695326	0		-0.93246	-0.81705	1.55326	-0.13103	1.01528	0.8542	1.33731	-0.50982	-0.46032	-0.5787	-0.60864	-0.40964	-0.49348	-0.63912	0.38823	1.52331	0.84264
994	113.253862161116	23.2477393710301	730596.782456829	2572735.70695326	5	1.60944	-0.62928	-1.00532	-0.27303	-0.97444	-0.89528	-1.12898	-0.99874	-0.13989	0.6337	1.23732	0.80242	0.91306	0.62162	-0.75797	0.24365	-0.87028	-0.73305
995	113.253558818198	23.229687064677	730596.782456829	2570735.70695326	1	0	-0.31664	-0.37569	-1.21515	0.21171	-0.74384	-1.12898	-0.99874	-0.32486	-0.32771	-0.02339	0.27327	0.03126	-0.49348	-0.59387	-0.70068	-0.59525	-0.20598
996	113.390569607159	23.2699470799495	744548.484829847	2575419.62520658	0		3.02662	1.16145	0.8322	-0.93625	0.34303	-1.12898	-0.99874	-0.50982	-0.62608	-0.59371	-0.60864	-0.40964	-0.49348	0.07933	1.96707	1.84544	1.31476
997	113.350283715412	23.2883917913682	740392.59686293	2577395.28832994	0		-0.11701	-0.12098	0.53456	-0.54149	-0.06288	-1.12898	-0.99874	-0.50982	-0.55978	-0.5787	-0.60864	-0.40964	-0.49348	-0.51292	-0.456	-0.66502	-0.63056
998	113.386611003209	23.020081634712	744596.78245683	2547735.70695326	6	1.79176	-0.83703	-0.63825	-0.13133	0.0177	0.05345	-1.11886	-0.77389	0.13756	-0.02934	-0.36858	0.62603	0.47216	-0.33418	-0.4655	-0.90343	-0.77921	-0.71265
999	113.312469911657	23.2468871333337	736596.782456831	2572735.70695326	2	0.693147	-0.60625	-0.76855	-1.11507	-0.37937	-0.92369	-1.12898	-0.99874	1.43231	0.53425	1.32737	1.33156	-0.40964	1.89602	-0.45736	-0.72179	-0.50342	-0.74628
1000	113.339416814319	23.111067774023	739596.782456831	2557735.70695326	2	0.693147	-0.52704	-0.65894	-0.28963	-0.69175	-0.51743	0.96273	-0.43373	0.69245	0.26903	0.39685	-0.60864	0.03126	2.53322	-0.79492	-0.57972	-0.81428	-0.57031
1001	113.307834377171	22.9761088520931	736596.782456831	2542735.70695326	17	2.83321	-0.80618	-0.74872	0.49016	0.24879	-0.53184	-1.11886	-0.77389	0.04507	0.76631	1.41742	1.15518	-0.40964	2.21462	-0.7132	-0.33628	-0.86053	-0.9252
1002	113.551563200108	23.1520625458899	761254.335378804	2562641.41735524	12	2.48491	1.01975	0.75804	2.73007	-0.14867	-0.33818	0.8542	1.33731	-0.50982	-0.62608	-0.59371	-0.60864	-0.40964	-0.49348	1.08825	1.66147	1.73224	1.60442
1003	113.555435363431	23.1799319549971	761596.78245683	2565735.70695326	0		0.69471	0.81145	0.53009	-0.10723	0.00184	0.8542	1.33731	-0.50982	-0.62608	-0.59371	-0.60864	-0.40964	-0.49348	1.24229	2.01027	0.25324	1.07733
1004	113.487439609787	23.1990762441371	754596.782456831	2567735.70695326	7	1.94591	-0.38329	0.49326	-0.84397	-0.24236	1.77588	0.8542	1.33731	-0.50982	-0.52663	-0.59371	-0.43226	-0.40964	-0.49348	-0.54906	-0.38453	0.22051	-0.35186
1005	113.408524824367	23.1551662774634	746596.78245683	2562735.70695326	9	2.19722	-0.47026	-0.85738	-1.25571	-0.2988	-0.73836	0.96955	0.68404	0.13756	0.50109	0.78707	0.62603	-0.40964	-0.17488	-1.04285	-0.5445	-0.86654	-0.56877
1006	113.546358216529	23.2161872292013	760596.782456829	2569735.70695326	10	2.30259	1.40884	0.84007	0.07292	0.22455	0.38021	0.8542	1.33731	-0.41734	-0.62608	-0.59371	-0.60864	-0.40964	-0.49348	0.74502	1.25974	0.83091	0.03408
1007	113.283320138026	23.2563419345876	733596.782456831	2573735.70695326	8	2.07944	-0.0369	-0.60865	-0.73784	-0.5568	-0.7261	-1.12898	-0.99874	0.04507	0.26903	0.68201	0.62603	0.03126	-0.01558	-0.45575	-0.75028	-0.63315	-1.07522
1008	113.380041680348	23.2007384652432	743596.78245683	2567735.70695326	1	0	-0.1022	-1.02234	-1.32844	-0.45053	0.13194	0.96955	0.68404	-0.50982	-0.46032	-0.20349	0.27327	1.35396	-0.49348	-0.354	-0.45861	-0.20212	-0.01025
1009	113.505788831046	23.1355941484307	756596.782456831	2560735.70695326	4	1.38629	-0.83232	1.56908	1.98262	-0.6782	-0.67142	0.8542	1.33731	-0.41734	-0.36086	-0.54868	-0.60864	-0.40964	-0.49348	0.0224	1.1924	-0.22268	-0.26371
1010	113.514873953204	23.0993403975036	757596.782456831	2556735.70695326	0		0.57684	0.43722	1.2166	0.76077	0.36253	0.8542	1.33731	-0.50982	-0.62608	-0.59371	-0.60864	-0.40964	-0.49348	-0.52734	-0.05266	0.60579	0.7489
1011	113.381162780644	23.2639158995943	743596.78245683	2574735.70695326	1	0	3.1346	1.90794	0.00244	-0.16667	1.91846	-1.12898	-0.99874	-0.50982	-0.62608	-0.59371	-0.60864	-0.40964	-0.49348	2.93891	1.80077	1.48263	1.96045
1012	113.563472696039	23.0895253055028	762596.105730987	2555735.05515055	1	0	0.6557	0.1481	1.69251	0.10168	-0.00145	0.8542	1.33731	-0.50982	-0.59293	-0.56369	-0.60864	-0.40964	-0.49348	-0.30435	0.20101	0.10902	1.19773
1013	113.31866243456	23.0391486303142	737596.782456831	2549735.70695326	2	0.693147	-1.02581	-0.66825	1.15561	-0.77425	-0.82241	-1.11886	-0.77389	-0.04741	1.16414	2.85823	0.80242	0.91306	0.78092	-0.6701	-0.95624	-0.87947	-0.98155
1014	113.390448303075	23.2366915816543	744596.78245683	2571735.70695326	0		0.14251	1.11916	-0.4119	2.11261	1.10504	0.96955	0.68404	-0.50982	-0.62608	-0.59371	-0.60864	-0.40964	-0.49348	3.67997	1.62525	1.62502	2.4817
1015	113.42690826481	23.0916903932654	748596.782456829	2555735.70695326	0		-0.21104	-0.06789	-0.60675	0.35221	0.28483	0.8542	1.33731	-0.50982	-0.59293	-0.5787	-0.60864	-0.40964	-0.49348	0.11792	-0.50982	0.16466	-0.41364
1016	113.534046277933	23.0809792440845	759596.782456829	2554735.70695326	7	1.94591	-0.75194	-0.95577	-0.13215	-0.62784	0.28542	0.8542	1.33731	0.13756	-0.42717	-0.53367	-0.60864	0.03126	-0.17488	-0.66938	-0.45904	0.06119	-0.39464
1017	113.253255779382	23.2116347131383	730596.782456829	2568735.70695326	1	0	-0.56285	-0.78138	-0.58498	-0.49822	-1.01317	-1.12898	-0.99874	0.13756	0.79946	1.5675	1.50794	0.47216	0.94022	-0.44879	-0.29004	-0.76964	-0.94793
1018	113.359880094975	23.1649306705272	741596.78245683	2563735.70695326	7	1.94591	-0.25538	-0.65253	-1.19015	-1.03425	-0.51577	0.96955	0.68404	0.04507	0.00381	-0.12845	-0.07949	0.03126	0.30302	-0.34468	-0.20619	-0.50759	-0.48161
1019	113.457985184049	23.1905119635902	751596.78245683	2566735.70695326	1	0	-0.05629	1.05375	0.05614	-0.7223	0.44756	0.8542	1.33731	-0.50982	-0.59293	-0.59371	-0.60864	-0.40964	-0.49348	0.25783	-0.3759	0.02632	0.72198
1020	113.360989788826	23.2281093171586	741596.78245683	2570735.70695326	0		0.03241	0.68935	-0.51723	0.64483	0.03055	0.96955	0.68404	-0.50982	-0.62608	-0.59371	-0.60864	-0.40964	-0.49348	2.06038	1.22224	0.64529	0.49781
1021	113.340200151324	23.1561964085343	739596.782456831	2562735.70695326	48	3.8712	-0.52917	-0.23174	-1.1484	-1.01281	-0.62696	0.96955	0.68404	0.32252	0.40164	0.60697	-0.43226	0.47216	0.14372	-0.47537	-0.37651	-0.80304	-0.50787
1022	113.497034876702	23.1898968980761	755596.782456831	2566735.70695326	0		1.57581	-1.02946	-0.3458	-0.08117	1.43623	0.8542	1.33731	-0.50982	-0.62608	-0.59371	-0.60864	-0.40964	-0.49348	-0.93987	-0.02504	0.68426	0.29955
1023	113.437478998806	23.1366656030233	749596.782456829	2560735.70695326	19	2.94444	-0.52363	-0.42793	-0.99387	-0.21107	-0.42616	0.96955	0.68404	-0.50982	-0.36086	-0.26352	-0.43226	-0.40964	0.14372	-0.20137	0.02606	-0.33053	0.03324
1024	113.292625713051	23.2291218220734	734596.782456831	2570735.70695326	17	2.83321	-0.58437	-0.26695	-0.80298	-0.8064	-0.28913	-1.12898	-0.99874	0.415	0.23588	-0.29354	0.09689	0.47216	-0.17488	-0.60281	-0.57542	-0.54308	-0.71642
1025	113.544480550559	23.1169199178483	760596.782456829	2558735.70695326	1	0	-0.15566	0.55551	2.78677	-0.08384	-0.78212	0.8542	1.33731	-0.32486	-0.1951	-0.29354	0.09689	0.91306	0.46232	-0.41495	0.22747	-0.45623	-0.05251
1026	113.328104808453	23.0209534611255	738596.782456831	2547735.70695326	4	1.38629	-0.35632	-0.21244	1.20576	-1.13384	-1.03439	-1.11886	-0.77389	0.23004	1.3299	1.79263	2.38985	-0.40964	1.57742	-0.65882	-0.65135	-0.80239	-0.64698
1027	113.338791561028	23.0749646626083	739596.782456831	2553735.70695326	0		-1.25047	-0.9624	-0.58908	-0.38248	-0.6127	0.96273	-0.43373	-0.32486	-0.1951	-0.3986	-0.43226	0.03126	-0.33418	-0.16361	-0.6784	-0.28693	-0.42972
1028	113.179777614758	23.2677615350486	722981.147320889	2574837.48666966	0		2.69724	1.20824	0.67124	3.22044	2.95351	-1.12898	-0.99874	-0.50982	-0.62608	-0.59371	-0.60864	-0.40964	-0.49348	3.73425	1.72844	2.90997	3.12802
1029	113.457325736216	23.1544123591291	751596.78245683	2562735.70695326	47	3.85015	0.81762	0.07992	0.07735	-1.01946	-0.80237	0.8542	1.33731	-0.41734	-0.29456	-0.30855	-0.60864	0.03126	-0.49348	-0.73891	-0.66529	0.09222	-0.4652
1030	113.221428428127	23.0586020409062	727596.78245683	2551735.70695326	1	0	0.22777	-0.75095	-0.36152	-0.76558	-0.87781	0.36414	-0.68004	0.32252	-0.29456	0.09668	-0.43226	-0.40964	-0.49348	-0.0104	-0.40839	-0.56264	-0.33334
1031	113.264393286188	23.292729111588	731596.782456829	2577735.70695326	0		-0.72976	-0.96298	0.45618	-0.17541	-0.18499	-1.12898	-0.99874	-0.41734	-0.59293	-0.02339	0.09689	0.47216	-0.17488	-0.18966	0.80848	-0.23585	-0.50778
1032	113.435293144807	23.012362758561	749602.370144378	2546962.87117044	0		0.86179	0.10497	0.12516	-0.43793	0.89759	-1.11886	-0.77389	-0.50982	-0.55978	-0.59371	-0.60864	-0.40964	-0.49348	0.34452	0.40053	0.62109	-0.0457
1033	113.43813256418	23.1727658258888	749596.782456829	2564735.70695326	209	5.34233	-0.12608	-0.23128	-0.18042	-0.97084	-0.70131	0.8542	1.33731	-0.50982	0.50109	-0.42861	-0.60864	0.03126	-0.49348	-0.8938	-0.46732	-0.05328	-0.65451
1034	113.41828517022	23.1550167010501	747596.78245683	2562735.70695326	30	3.4012	0.01838	-0.59716	-0.62016	-0.81055	-0.47503	0.96955	0.68404	-0.41734	-0.49347	-0.59371	-0.60864	-0.40964	-0.49348	0.07907	-0.15044	-0.13969	-0.3277
1035	113.407075204228	23.0739385543866	746596.78245683	2553735.70695326	0		-1.11617	-0.56178	-0.5703	-0.31611	0.57624	0.8542	1.33731	-0.23238	-0.55978	-0.44362	-0.60864	0.47216	-0.33418	-0.26777	-0.73302	-0.81478	-0.3948
1036	113.291548081544	23.165940107131	734596.782456831	2563735.70695326	0		-0.59166	-0.00059	-0.33242	-0.1034	1.19485	-1.12898	-0.99874	-0.50982	-0.62608	-0.59371	-0.60864	-0.40964	-0.49348	1.71102	-0.3276	0.79835	0.62831
1037	113.281174573491	23.1299775638909	733596.782456831	2559735.70695326	7	1.94591	-1.08161	-0.77442	-1.35388	-1.10624	-0.40939	1.03026	1.28127	3.55942	2.68914	1.59752	2.919	4.44026	1.57742	-0.67722	-0.8149	-0.75897	-1.00933
1038	113.332709116966	23.2903784256217	738590.790863236	2577586.27134776	0		0.26551	1.05176	0.92926	0.13114	-0.40473	-1.12898	-0.99874	-0.50982	-0.59293	-0.5787	-0.60864	-0.40964	-0.49348	0.33177	-0.16314	-0.45888	0.17295
1039	113.350118614565	23.1650766880047	740596.78245683	2563735.70695326	2	0.693147	-0.4614	-0.42294	-1.23899	-1.03045	-0.61374	0.96955	0.68404	0.32252	0.96522	1.25233	-0.07949	0.03126	0.30302	-0.49486	-0.63764	-0.76473	-0.57567
1040	113.289862298213	23.0666534365801	734596.782456831	2552735.70695326	3	1.09861	-0.88236	-0.82811	0.48816	-0.50749	-0.98295	0.96273	-0.43373	1.06238	3.02066	2.46801	1.86071	0.03126	2.05532	-0.81685	-0.87014	-0.76002	-0.83991
1041	113.299770600335	23.0755377786812	735596.782456831	2553735.70695326	10	2.30259	0.15002	-0.83342	-0.28077	-0.33769	-0.81109	0.96273	-0.43373	0.23004	0.46794	0.33681	0.9788	-0.40964	0.62162	-0.48642	-0.69355	-0.54872	-0.44687
1042	113.525474308167	23.1443070638085	758596.782456831	2561735.70695326	18	2.89037	0.73395	0.4006	3.42831	0.10055	-0.38586	0.8542	1.33731	-0.50982	-0.46032	-0.56369	-0.60864	-0.40964	-0.49348	-0.38008	1.12297	-0.28259	-0.15418
1043	113.379402817048	23.1646368235018	743596.78245683	2563735.70695326	0		-0.99928	-0.86489	-0.74369	-0.16458	-0.57514	0.96955	0.68404	0.23004	0.43479	1.50747	1.33156	0.03126	0.46232	-0.38579	0.26861	-0.93857	-0.80338
1044	113.261050467858	23.0941538384326	731596.782456829	2555735.70695326	0		-0.24578	-0.9253	-0.85869	-0.93416	-0.96969	0.96273	-0.43373	4.29928	4.54566	2.64811	2.38985	0.91306	4.12623	-0.28772	-0.80055	-0.89549	-0.83485
1045	113.303167582622	23.2741081435765	735596.782456831	2575735.70695326	18	2.89037	-0.14374	-0.3913	-0.78212	-0.6529	-0.62437	-1.12898	-0.99874	0.23004	0.10327	-0.09843	-0.25588	0.03126	-0.33418	-0.87698	-0.19156	-0.84614	-0.92748
1046	113.417799278138	23.1279410905858	747596.78245683	2559735.70695326	26	3.2581	-0.78292	-0.94199	-0.7064	-0.32237	-0.74048	0.96955	0.68404	0.23004	0.16957	1.7326	3.27176	-0.40964	1.57742	-0.47694	-0.39929	-0.6358	-0.33301
1047	113.359405704455	23.1378539372157	741596.78245683	2560735.70695326	38	3.63759	-0.20279	-0.12098	-1.15269	-1.17367	-0.76994	0.96955	0.68404	2.72707	2.25816	0.65199	0.09689	0.47216	0.46232	-0.93194	-0.82437	-0.8084	-0.99723
1048	113.496532327037	23.162823011867	755596.782456831	2563735.70695326	7	1.94591	0.39689	0.09362	1.25901	-0.59304	-0.38349	0.8542	1.33731	-0.41734	-0.22826	-0.33856	-0.60864	-0.40964	-0.17488	-0.50749	-0.44668	-0.46008	-0.58568
1049	113.231928312266	23.1035969513888	728596.78245683	2556735.70695326	24	3.17805	-0.59208	-0.58505	-0.94937	-0.72643	-0.582	0.36414	-0.68004	-0.13989	-0.26141	-0.27853	-0.25588	0.47216	-0.17488	-0.61501	-0.73761	-0.87033	-0.72151
1050	113.318817018242	23.0481745955646	737596.782456831	2550735.70695326	6	1.79176	0.19479	-0.33233	0.47111	-0.06055	0.1857	0.96273	-0.43373	-0.50982	-0.62608	-0.59371	-0.60864	-0.40964	-0.33418	0.70838	-0.67465	-0.60551	-0.01341
1051	113.25401394667	23.2567655072531	730596.782456829	2573735.70695326	0		-0.9523	-0.83256	-0.65194	-0.15173	-0.58382	-1.12898	-0.99874	-0.32486	-0.1951	0.24676	1.68433	-0.40964	0.30302	-0.29557	0.44466	-0.60237	-0.67408
1052	113.31107190476	23.1656547172177	736596.782456831	2563735.70695326	1	0	-0.42876	-0.6031	-0.69591	-0.75385	-0.66965	0.96955	0.68404	-0.41734	-0.42717	-0.54868	-0.43226	-0.40964	-0.33418	0.42868	-0.38034	-0.5243	-0.24946
1053	113.250992663219	23.0762406392324	730596.782456829	2553735.70695326	0		-0.76909	-0.44349	-0.70968	-0.24823	-0.61225	0.36414	-0.68004	-0.32486	-0.02934	-0.45863	-0.60864	-0.40964	-0.49348	-0.59415	-0.80195	-0.29506	-0.91765
1054	113.268841007933	22.976672041773	732596.78245683	2542735.70695326	0		-0.13496	-0.5338	2.01977	-0.74553	0.09702	-1.11886	-0.77389	-0.41734	-0.36086	-0.50366	-0.43226	-0.40964	-0.49348	-0.4249	-0.39917	-0.70373	-0.16477
1055	113.177655810756	23.0696740933454	723092.261471244	2552894.51885778	0		-1.21405	1.31696	1.49846	-0.57978	0.28208	0.36414	-0.68004	-0.50982	-0.62608	-0.59371	-0.60864	-0.40964	-0.49348	-0.26352	-0.2167	0.13112	0.04997
1056	113.205020274034	23.2484328876603	725596.78245683	2572735.70695326	0		-1.07067	1.35355	0.42517	2.76831	-0.72748	-1.12898	-0.99874	-0.50982	-0.59293	-0.54868	-0.43226	-0.40964	-0.49348	-0.09398	-0.12959	0.31432	-0.7556
1057	113.327794890481	23.0029015766323	738596.782456831	2545735.70695326	0		-1.06803	-0.56173	0.8571	-0.61934	-0.38252	-1.11886	-0.77389	-0.50982	0.07011	-0.20349	-0.43226	0.47216	6.83433	-0.07198	-0.54823	-0.90333	-0.00224
1058	113.415702196895	23.0106122614423	747596.78245683	2546735.70695326	1	0	0.73582	0.04226	-0.85563	0.47717	-0.16903	-1.11886	-0.77389	-0.50982	-0.52663	-0.59371	-0.60864	-0.40964	-0.49348	-0.46452	-0.01091	1.17326	-0.2709
1059	113.328725581983	23.0570570947646	738596.782456831	2551735.70695326	0		-0.12928	-0.63568	-0.31017	-0.02812	-0.34017	0.96273	-0.43373	-0.32486	-0.32771	-0.33856	-0.25588	0.03126	-0.33418	-0.45816	-0.5141	-0.0348	0.08929
1060	113.180542372802	23.2613572548696	723070.072515356	2574129.33202944	0		2.85379	1.2714	0.76674	3.58508	2.55499	-1.12898	-0.99874	-0.50982	-0.62608	-0.59371	-0.60864	-0.40964	-0.49348	3.87394	1.35403	3.08718	3.03405
1061	113.238908499089	23.3159818700505	728949.499090976	2580270.69932897	0		2.76797	-0.53738	1.57722	0.82942	0.6543	-1.12898	-0.99874	-0.50982	-0.62608	-0.59371	-0.60864	-0.40964	-0.49348	0.78202	1.32041	1.09956	-0.13566
1062	113.222170394416	23.1037346951054	727596.78245683	2556735.70695326	0		-1.1011	-0.15681	-0.51895	-0.41995	-0.41795	0.36414	-0.68004	1.61728	1.19729	0.18673	0.09689	0.03126	-0.01558	-0.91541	-0.89488	-0.63686	-0.87294
1063	113.398121920047	23.1192138951248	745596.78245683	2558735.70695326	2	0.693147	-1.12341	-0.87821	-0.97269	-0.94021	-0.84561	0.96955	0.68404	2.81956	1.42936	4.92939	6.44664	0.91306	3.01113	-0.27979	-0.74331	-0.84475	-0.77769
1064	113.346880460025	22.9851669567255	740585.246710869	2543802.55384366	1	0	0.09769	-0.94411	-0.62345	-0.65774	-0.66101	-1.11886	-0.77389	-0.04741	-0.26141	-0.38359	-0.43226	-0.40964	-0.49348	-0.18914	-0.05074	-0.13711	-0.64489
1065	113.486272152765	23.135903293313	754596.782456831	2560735.70695326	0		1.32039	-0.3639	1.23061	0.51582	-0.06117	0.8542	1.33731	-0.50982	-0.59293	-0.59371	-0.60864	-0.40964	-0.49348	0.55129	0.60157	1.54585	0.78395
1066	113.310452593044	23.1295511267162	736596.782456831	2559735.70695326	10	2.30259	-0.79296	-0.40596	-0.77318	-1.03076	-0.72539	1.03026	1.28127	4.11431	3.45164	1.10224	0.09689	0.47216	1.73672	-0.86981	-0.99099	-0.68753	-1.00315
1067	113.303316883186	23.2990998778749	735568.042447966	2578504.17598019	4	1.38629	-0.64575	-0.75828	-0.95043	0.10192	-0.24098	-1.12898	-0.99874	-0.32486	-0.59293	-0.42861	-0.43226	0.03126	-0.49348	-0.13674	-0.4463	-0.59669	-0.62415
1068	113.41747575683	23.1098906266283	747596.78245683	2557735.70695326	1	0	-0.49874	-0.6255	0.41076	-0.47041	-0.32769	0.96955	0.68404	0.04507	1.49566	0.39685	0.9788	0.47216	0.78092	-1.05833	-0.71542	-0.69769	-0.77211
1069	113.350591759515	23.1921535092445	740596.78245683	2566735.70695326	2	0.693147	0.64714	-0.14336	-0.82681	-0.54443	0.33837	0.96955	0.68404	-0.50982	-0.62608	-0.59371	-0.60864	-0.40964	-0.49348	1.54089	-0.24422	0.01551	0.1352
1070	113.270201007078	23.0579088085046	732596.78245683	2551735.70695326	1	0	0.91604	-0.06864	0.40495	0.01186	0.0397	0.36414	-0.68004	-0.50982	-0.59293	-0.56369	-0.60864	-0.40964	-0.49348	0.8674	-0.6882	0.36937	0.0094
1071	113.370915271047	23.2369876617146	742596.78245683	2571735.70695326	0		-0.40856	0.35341	3e-05	1.57952	-0.7805	-1.12898	-0.99874	-0.50982	-0.59293	-0.53367	-0.60864	-0.40964	-0.49348	-0.05916	1.76374	1.16472	2.0406
1072	113.486438681171	23.1449280349794	754596.782456831	2561735.70695326	0		0.77264	-0.58695	1.43285	-0.16974	-0.88237	0.8542	1.33731	-0.50982	-0.55978	-0.59371	-0.60864	-0.40964	-0.49348	-0.34341	0.43337	0.38183	0.06418
1073	113.417152560693	23.0918401171203	747596.78245683	2555735.70695326	2	0.693147	0.34882	0.44972	0.00663	-0.34975	-0.1672	0.96273	-0.43373	-0.50982	-0.62608	-0.59371	-0.60864	-0.40964	-0.49348	0.48777	-0.30376	0.31172	0.09916
1074	113.395563709698	22.9939180880823	745562.078645155	2544852.62524116	7	1.94591	-0.94144	-1.10274	-0.83057	-0.67368	-0.35443	-1.11886	-0.77389	-0.50982	-0.49347	-0.54868	-0.60864	-0.40964	-0.49348	-0.5668	0.37687	0.06116	0.19867
1075	113.221576672064	23.0676285941689	727596.78245683	2552735.70695326	0		-0.14329	0.21849	-0.97091	-0.81241	-0.65073	0.36414	-0.68004	-0.32486	-0.39402	-0.56369	-0.60864	-0.40964	-0.49348	0.13904	-0.58805	-0.07276	-0.38519
1076	113.51639031177	23.1805612557251	757596.782456831	2565735.70695326	3	1.09861	-1.02422	0.00334	1.01361	0.26126	0.95806	0.8542	1.33731	-0.50982	-0.46032	-0.54868	-0.43226	0.03126	-0.49348	-0.65856	-0.12016	0.27828	0.14326
1077	113.418123124811	23.1459915089632	747596.78245683	2561735.70695326	6	1.79176	-0.86067	-0.51679	-1.02134	-0.56164	0.12151	0.96955	0.68404	-0.04741	-0.52663	-0.59371	-0.60864	0.03126	-0.49348	0.05438	-0.42105	-0.5846	0.44855
1078	113.41958446643	23.227217826813	747596.78245683	2570735.70695326	0		-0.30659	-0.45208	1.07735	2.03534	1.55498	0.8542	1.33731	-0.41734	-0.62608	-0.59371	-0.60864	-0.40964	-0.49348	0.01534	1.22481	-0.40802	0.37114
1079	113.524967154789	23.1172336133089	758596.782456831	2558735.70695326	0		-0.96855	-0.21743	2.20232	-0.17565	-0.25363	0.8542	1.33731	-0.13989	-0.32771	-0.38359	-0.43226	-0.40964	-0.49348	0.23284	0.56363	-0.52233	-0.616
1080	113.222616470739	23.1308141529864	727596.78245683	2559735.70695326	6	1.79176	0.12815	-0.2131	-0.98793	-0.62726	-0.47188	0.36414	-0.68004	-0.32486	0.10327	-0.09843	0.27327	0.03126	-0.33418	-0.50446	-0.70094	-0.70225	-1.04977
1081	113.506965429036	23.1987661587475	756596.782456831	2567735.70695326	0		1.67062	0.5852	-0.39555	0.83119	2.64981	0.8542	1.33731	-0.50982	-0.62608	-0.59371	-0.60864	-0.40964	-0.49348	1.99002	0.1355	2.04417	1.14396
1082	113.298231094632	22.969623198281	735623.145803403	2542001.88333392	4	1.38629	0.72988	-0.67348	1.21821	-0.58231	-0.99841	-1.11886	-0.77389	-0.32486	-0.36086	-0.53367	-0.60864	-0.40964	0.14372	-0.27906	0.17882	-0.52708	-0.54891
1083	113.224707070469	23.2571836181141	727596.78245683	2573735.70695326	1	0	0.23562	0.96914	-0.04462	1.0986	-0.64294	-1.12898	-0.99874	-0.50982	-0.42717	0.05165	-0.07949	-0.40964	-0.49348	-0.38662	0.21993	-0.5094	-0.55604
1084	113.526321263936	23.1894292513104	758596.782456831	2566735.70695326	0		-0.43143	-0.43566	1.18723	0.63935	1.62337	0.8542	1.33731	-0.50982	-0.62608	-0.5787	-0.60864	-0.40964	-0.49348	0.99971	0.65307	1.79061	1.63772
1085	113.360355200745	23.1920073016011	741596.78245683	2566735.70695326	3	1.09861	0.04067	0.05329	-1.2922	-0.29729	-0.16448	0.96955	0.68404	-0.13989	-0.02934	-0.11344	-0.25588	0.03126	0.30302	0.30703	-0.76925	-0.7247	-0.52467
1086	113.517235698753	23.2256835522873	757596.782456831	2570735.70695326	0		0.05853	1.94166	0.96883	2.80395	2.64623	0.8542	1.33731	-0.13989	-0.62608	-0.5787	-0.60864	-0.40964	-0.49348	0.91968	0.47928	-0.16731	1.26769
1087	113.534893512675	23.1261014936929	759596.782456829	2559735.70695326	4	1.38629	1.84078	-0.60644	3.14259	-0.89575	-0.70205	0.8542	1.33731	-0.41734	-0.22826	-0.35357	-0.43226	-0.40964	-0.49348	-0.80417	0.83823	-0.49889	-1.02064
1088	113.26929365575	23.0037510650421	732596.78245683	2545735.70695326	0		-0.11762	-1.13274	0.53281	0.85356	-0.3585	-1.11886	-0.77389	-0.50982	-0.49347	-0.00838	-0.07949	0.47216	-0.49348	-0.81391	-0.49545	-0.5528	-0.57854
1089	113.327485284792	22.9848496470624	738596.782456831	2543735.70695326	7	1.94591	-0.92387	-0.59128	-0.4827	-0.14194	-0.72887	-1.11886	-0.77389	0.04507	-0.29456	-0.27853	-0.43226	0.03126	-0.33418	-0.47521	-0.55834	-0.67725	-0.40532
1090	113.406593454034	23.0468624420017	746596.78245683	2550735.70695326	12	2.48491	-0.35096	-0.17119	-1.37153	-1.08783	0.54525	-1.11886	-0.77389	-0.23238	0.10327	1.04221	0.44965	0.47216	0.46232	-0.2561	-0.70533	-0.60305	-0.73758
1091	113.370437006097	23.2099113923335	742596.78245683	2568735.70695326	1	0	-0.19626	0.10335	-0.70536	-0.52408	-0.27551	0.96955	0.68404	-0.50982	-0.59293	-0.3986	-0.43226	-0.40964	-0.49348	-0.66934	0.10362	-0.23551	-0.32257
1092	113.290627407643	23.1117839106087	734596.782456831	2557735.70695326	3	1.09861	-1.04249	-1.03246	-1.26296	-0.91443	0.74537	1.03026	1.28127	0.13756	0.30218	-0.41361	-0.43226	1.35396	-0.33418	-0.44089	-0.86543	-0.88719	-0.6502
1093	113.377493913304	23.0563308070955	743596.78245683	2551735.70695326	7	1.94591	-0.77189	-1.01699	-1.33407	-1.02926	-0.09224	0.96273	-0.43373	-0.50982	-0.02934	-0.50366	-0.25588	0.47216	-0.17488	-0.55449	-0.6534	-0.45292	-0.29571
1094	113.195985142449	23.1653781422558	724811.080815044	2563522.61514985	0		-1.01049	-0.33522	0.3804	0.0351	-0.50402	-1.12898	-0.99874	-0.50982	-0.62608	-0.59371	-0.60864	-0.40964	-0.49348	-0.10363	-0.74073	-0.06747	0.80522
1095	113.458315404801	23.2085616971051	751596.78245683	2568735.70695326	0		1.15996	2.20261	1.22649	0.34555	0.28243	0.8542	1.33731	-0.50982	-0.62608	-0.56369	-0.60864	-0.40964	-0.49348	-0.21707	0.22364	1.40371	2.48428
1096	113.303012359469	23.2650823368291	735596.782456831	2574735.70695326	12	2.48491	-0.77174	-0.95596	-0.65042	-0.97503	-0.81033	-1.12898	-0.99874	-0.13989	0.30218	1.07223	2.21347	-0.40964	1.09952	-0.70511	0.09787	-0.70496	-0.66699
1097	113.428534018799	23.181941833155	748596.782456829	2565735.70695326	41	3.71357	0.6152	-0.65067	-0.25124	-0.89792	-0.07628	0.96955	0.68404	-0.32486	-0.29456	-0.33856	-0.43226	-0.40964	-0.33418	-0.22502	-0.58788	-0.58516	0.37605
1098	113.380201596671	23.2097638472102	743596.78245683	2568735.70695326	2	0.693147	-0.35274	0.11176	-1.05427	-0.19142	-0.25447	0.96955	0.68404	-0.32486	-0.1951	1.10224	0.27327	0.03126	0.78092	-0.8231	0.0854	-0.64483	-0.94657
1099	113.5538955385	23.0987135519778	761596.78245683	2556735.70695326	2	0.693147	-0.34871	0.04142	1.74784	-0.53506	-0.78822	0.8542	1.33731	-0.23238	-0.16195	0.17172	0.62603	-0.40964	-0.33418	-0.70842	-0.39117	-0.39341	-0.67711
1100	113.517066451677	23.2166591160045	757596.782456831	2569735.70695326	0		-0.88178	0.90851	0.51422	2.51652	1.88497	0.8542	1.33731	-0.13989	-0.59293	-0.56369	-0.60864	-0.40964	-0.49348	-0.97274	0.49694	-0.32417	0.31856
1101	113.302702146424	23.2470306892851	735596.782456831	2572735.70695326	1	0	-0.30735	-0.50782	-0.99134	-0.86397	-0.84671	-1.12898	-0.99874	-0.50982	-0.29456	0.15671	0.27327	-0.40964	-0.33418	-0.81439	-0.22253	-0.7144	-0.67008
1102	113.396202225395	23.0109087388633	745596.78245683	2546735.70695326	7	1.94591	-1.22227	-0.57293	-0.53627	0.23579	-0.22969	-1.11886	-0.77389	-0.04741	-0.09565	0.77206	1.50794	0.03126	0.78092	-0.99499	-0.50973	-0.80852	-0.39453
1103	113.371394255915	23.264063828519	742596.78245683	2574735.70695326	0		1.6731	0.88501	-0.47202	0.48381	0.79033	-1.12898	-0.99874	-0.50982	-0.62608	-0.59371	-0.60864	-0.40964	-0.49348	2.20737	1.44397	0.05729	0.63816
1104	113.271719361697	23.1481708144288	732596.78245683	2561735.70695326	6	1.79176	-1.2746	-0.98792	-0.97994	-0.99627	0.29767	1.03026	1.28127	1.33983	0.36848	-0.3986	-0.43226	0.91306	-0.17488	-0.50052	-0.49388	-0.89069	-0.67628
1105	113.273245364018	23.2384316923931	732596.78245683	2571735.70695326	3	1.09861	-1.0889	-0.39302	-0.15541	-1.07572	-0.99874	-1.12898	-0.99874	1.24735	0.13642	2.01776	2.38985	-0.40964	1.25882	-0.8623	-0.23759	-0.85047	-0.36699
1106	113.292317431983	23.2110699601053	734596.782456831	2568735.70695326	3	1.09861	-0.34771	-1.04354	-0.89381	-0.78851	-0.74332	-1.12898	-0.99874	0.50749	0.26903	-0.15846	-0.43226	0.03126	-0.49348	-0.47317	-0.58087	-0.30745	-0.7873
1107	113.30764832384	22.9691279404321	736589.862480273	2541962.18557018	9	2.19722	-0.78461	-1.02029	0.55477	0.20987	-0.12495	-1.11886	-0.77389	-0.23238	-0.16195	0.60697	0.09689	0.03126	0.94022	-0.60677	0.04539	-0.33458	-0.89813
1108	113.369800438253	23.1738095404331	742596.78245683	2564735.70695326	1	0	-0.35025	0.46575	-0.78603	-0.6222	-0.30018	0.96955	0.68404	-0.50982	-0.49347	-0.54868	-0.60864	-0.40964	-0.49348	0.66523	-0.07838	0.39435	0.05906
1109	113.360196752643	23.1829817692757	741596.78245683	2565735.70695326	23	3.13549	-0.64184	0.25849	-0.9742	-0.80529	-0.59086	0.96955	0.68404	-0.04741	0.40164	-0.45863	-0.60864	0.03126	-0.17488	-0.85547	-0.60185	-0.76591	0.02064
1110	113.349803580361	23.1470254170812	740596.78245683	2561735.70695326	159	5.0689	-0.79811	-0.74996	-1.12717	-1.20035	-0.6586	0.96955	0.68404	0.415	1.23044	-0.17347	-0.07949	2.23576	1.09952	-0.59019	-0.71956	-0.5306	-0.35625
1111	113.318199150441	23.0120706669228	737596.782456831	2546735.70695326	5	1.60944	-0.83914	-0.97625	0.42476	-0.15752	-0.86769	-1.11886	-0.77389	0.87742	0.53425	1.2073	0.9788	0.03126	1.09952	-0.57068	-0.66627	-0.9356	-0.71364
1112	113.272634043906	23.202327476795	732596.78245683	2567735.70695326	7	1.94591	-0.85698	-0.33147	-1.2527	-0.84743	-0.7282	-1.12898	-0.99874	0.9699	0.99838	1.34238	1.86071	0.47216	1.41812	-0.79507	-0.59687	-0.49662	-0.86404
1113	113.215684880524	23.3024534899716	726596.78245683	2578735.70695326	1	0	0.25376	0.98587	0.33643	-0.8177	0.33186	-1.12898	-0.99874	-0.50982	-0.55978	-0.54868	-0.43226	-0.40964	-0.49348	-0.1527	2.77801	0.92781	-0.55976
1114	113.195695433256	23.2756492242623	724596.78245683	2575735.70695326	0		-0.03831	-0.05938	-0.47945	1.73464	0.97654	-1.12898	-0.99874	-0.50982	-0.62608	-0.59371	-0.60864	-0.40964	-0.49348	0.91717	1.56559	0.66437	0.67437
1115	113.516559219538	23.1895857380596	757596.782456831	2566735.70695326	0		0.22446	0.13767	0.57214	0.61628	1.85946	0.8542	1.33731	-0.50982	-0.62608	-0.59371	-0.60864	-0.40964	-0.49348	1.42005	0.24864	1.41271	1.14091
1116	113.196071604353	23.3021617928513	724590.751774196	2578672.82397263	0		0.21954	2.04382	0.81377	0.7537	0.35014	-1.12898	-0.99874	-0.50982	-0.62608	-0.5787	-0.60864	-0.40964	-0.49348	0.11328	3.08626	0.89052	0.85113
1117	113.435363966472	23.0193386185094	749596.782456829	2547735.70695326	0		0.17921	-0.00037	0.08461	0.09621	0.99811	-1.11886	-0.77389	-0.50982	-0.59293	-0.54868	-0.60864	-0.40964	-0.33418	-0.29114	0.15918	0.28652	0.7601
1118	113.367582498625	23.047451627495	742596.78245683	2550735.70695326	0		-0.57666	-0.25683	-1.1283	-0.56424	0.09451	0.96273	-0.43373	-0.50982	-0.39402	-0.48865	-0.60864	-0.40964	-0.49348	0.21736	0.11486	-0.44061	-0.03927
1119	113.435526170365	23.0283638394725	749596.782456829	2548735.70695326	0		-0.46039	0.14033	-0.34116	0.16927	-0.15718	-1.11886	-0.77389	-0.50982	-0.55978	-0.53367	-0.60864	-0.40964	-0.49348	0.33948	0.03839	-0.79421	-0.42845
1120	113.429513396732	23.236092148891	748596.782456829	2571735.70695326	0		0.32769	0.39496	1.29366	2.09283	0.76603	-1.12898	-0.99874	-0.50982	-0.62608	-0.59371	-0.60864	-0.40964	-0.49348	-0.01124	1.86619	1.42513	0.58688
1121	113.302237409656	23.2199531329012	735596.782456831	2569735.70695326	9	2.19722	-0.98559	-0.64413	-0.85078	-0.54476	-0.71956	-1.12898	-0.99874	2.07969	2.52338	5.28959	3.80091	0.03126	5.24133	-0.91424	-0.88078	-0.89576	-0.92614
1122	113.341142756172	23.2103503956992	739596.782456831	2568735.70695326	15	2.70805	0.79622	-0.26097	-0.00355	0.26398	0.71208	-1.12898	-0.99874	-0.23238	-0.52663	-0.53367	-0.43226	-0.40964	-0.17488	0.05041	0.07898	0.4573	0.37424
1123	113.231331988044	23.0674910900482	728596.78245683	2552735.70695326	0		-0.33263	-0.75784	-0.3237	-0.41798	-0.64615	0.36414	-0.68004	0.50749	0.60055	0.38184	0.27327	-0.40964	-0.17488	-0.47992	-1.00623	-0.86208	-0.43289
1124	113.318044877967	23.0030446565912	737596.782456831	2545735.70695326	0		-1.26312	-0.64059	0.59099	-0.04248	0.08956	-1.11886	-0.77389	-0.50982	-0.46032	-0.44362	-0.43226	-0.40964	0.46232	0.30761	-0.21509	-0.68641	0.31136
1125	113.449045453107	23.2357887965143	750596.782456829	2571735.70695326	0		2.13514	2.01801	0.52484	1.13553	1.47652	0.8542	1.33731	-0.50982	-0.62608	-0.59371	-0.60864	-0.40964	-0.49348	1.15653	1.70402	1.44643	2.57664
1126	113.409656846639	23.2183427572782	746596.78245683	2569735.70695326	0		0.85183	0.8129	0.43254	1.42276	1.21373	0.8542	1.33731	-0.50982	-0.62608	-0.59371	-0.60864	-0.40964	-0.49348	2.10128	0.61762	0.73336	1.81031
1127	113.2437919036	23.2298268601759	729596.782456829	2570735.70695326	0		-1.2297	-0.11647	-0.55053	0.48093	-0.45342	-1.12898	-0.99874	-0.50982	-0.49347	-0.5787	-0.60864	-0.40964	-0.49348	0.2081	-0.16362	0.38529	0.25611
1128	113.279347494956	23.0216634860505	733596.782456831	2547735.70695326	0		-0.80393	0.61634	-0.17763	0.13789	-0.24001	-1.11886	-0.77389	-0.50982	-0.39402	-0.53367	-0.25588	-0.40964	-0.33418	1.5068	-0.43257	0.42571	0.34549
1129	113.425775091958	23.028513707498	748596.782456829	2548735.70695326	0		-0.59466	-0.43631	-0.43736	0.70335	-0.48252	-1.11886	-0.77389	-0.41734	-0.52663	-0.3986	-0.60864	-0.40964	-0.49348	-0.52396	-0.51884	0.09974	-0.49203
1130	113.234927975117	23.2841235582531	728596.78245683	2576735.70695326	2	0.693147	0.41259	-0.1364	-0.86696	-0.7214	-0.8581	-1.12898	-0.99874	-0.50982	-0.55978	-0.54868	-0.07949	-0.40964	-0.49348	0.52939	1.89545	-0.38181	-0.06992
1131	113.262565355409	23.1844160035466	731596.782456829	2565735.70695326	3	1.09861	-0.27557	-0.78065	-0.63159	-0.33056	0.19941	-1.12898	-0.99874	0.50749	0.99838	1.67256	1.50794	1.79486	4.28553	-0.58344	-0.95564	-0.75025	-0.91586
1132	113.349017378645	23.1018970413136	740596.78245683	2556735.70695326	10	2.30259	-0.05207	-0.54454	-0.74484	-0.55775	-0.66679	0.96273	-0.43373	-0.23238	0.33533	-0.53367	-0.60864	0.03126	-0.49348	-0.22886	-0.75754	-0.40164	-0.56714
1133	113.42723276226	23.1097407724712	748596.782456829	2557735.70695326	7	1.94591	-0.77578	-0.65584	-0.07349	-0.4668	0.13179	0.96955	0.68404	0.13756	0.70001	0.47189	1.50794	0.47216	0.94022	-0.55555	-0.50073	-0.76282	-0.67828
1134	113.406914539992	23.0649131949511	746596.78245683	2552735.70695326	0		-0.40537	-0.56104	-1.13052	-0.61227	0.0877	0.8542	1.33731	-0.32486	-0.49347	-0.53367	-0.43226	-0.40964	-0.49348	-0.37708	-0.70878	-0.84252	0.07938
1135	113.329970884587	23.1292638198315	738596.782456831	2559735.70695326	71	4.26268	-1.09142	-1.07315	-1.0017	-0.60531	0.07338	0.96955	0.68404	2.26466	3.58425	4.95941	4.33006	2.23576	8.10873	-0.64527	-0.83406	-0.73289	-0.95952
1136	113.406433032263	23.0378370484952	746596.78245683	2549735.70695326	1	0	-1.11818	0.48868	-1.05898	-0.84628	0.0732	-1.11886	-0.77389	-0.23238	-0.06249	-0.36858	-0.60864	2.67666	0.14372	-0.51234	-0.60678	-0.71033	-0.3748
1137	113.243490175461	23.2117743875563	729596.782456829	2568735.70695326	5	1.60944	-0.8685	-0.7843	0.07337	0.03661	-0.95147	-1.12898	-0.99874	0.32252	0.00381	0.57695	0.9788	0.47216	0.30302	-0.78698	-0.45804	-0.94638	-0.65791
1138	113.397801165429	23.1011631493207	745596.78245683	2556735.70695326	3	1.09861	-0.34588	-0.08572	-0.4145	-0.17898	-0.27339	0.96273	-0.43373	-0.41734	-0.59293	-0.48865	-0.60864	-0.40964	-0.49348	0.6049	-0.51558	-0.16417	-0.08374
1139	113.2141929111	23.2121897772892	726596.78245683	2568735.70695326	2	0.693147	0.1175	-0.44519	-1.12153	-0.03715	-0.83525	-1.12898	-0.99874	-0.32486	-0.42717	-0.41361	-0.60864	-0.40964	-0.49348	-0.72156	-0.63462	-0.37785	0.3938
1140	113.293088714756	23.2561995300542	734596.782456831	2573735.70695326	11	2.3979	-0.65955	-0.33492	-1.2679	-1.12708	-0.9495	-1.12898	-0.99874	0.23004	0.89892	1.19229	1.15518	-0.40964	1.41812	-0.53385	-0.28365	-0.83529	-0.69337
1141	113.49619771426	23.1447736969952	755596.782456831	2561735.70695326	9	2.19722	-0.0766	0.39932	1.93756	-0.4919	-0.16228	0.8542	1.33731	-0.50982	-0.62608	-0.5787	-0.60864	-0.40964	-0.49348	-0.97429	0.63332	-0.21421	-0.34838
1142	113.251895863109	23.1303985728194	730596.782456829	2559735.70695326	11	2.3979	-1.12803	-0.85478	-1.05035	-1.07756	-0.51589	0.36414	-0.68004	3.92935	4.91034	3.42855	3.97729	3.55846	3.48903	-0.86134	-0.73527	-0.89987	-1.0243
1143	113.466424940001	23.1181602421093	752596.782456831	2558735.70695326	0		0.6444	0.03033	-0.2574	0.01008	-0.33087	0.8542	1.33731	-0.50982	-0.55978	-0.59371	-0.60864	-0.40964	-0.49348	0.68887	-0.20866	0.0093	0.73062
1144	113.312781437732	23.264938656584	736596.782456831	2574735.70695326	2	0.693147	0.07503	-0.3662	-0.4311	-0.5423	-0.78787	-1.12898	-0.99874	-0.41734	-0.36086	0.39685	0.80242	-0.40964	-0.17488	-0.13997	-0.22153	-0.47065	0.1116
1145	113.259543181659	23.0038905483291	731596.782456829	2545735.70695326	0		-0.30983	-0.69301	1.19336	1.08922	0.5391	-1.11886	-0.77389	-0.50982	-0.46032	-0.54868	-0.60864	-0.40964	-0.49348	-0.38144	-0.4597	-0.41939	0.63668
1146	113.377970059768	23.083407464429	743596.78245683	2554735.70695326	4	1.38629	0.24047	-0.38814	-0.13552	-0.67174	-0.67663	0.96273	-0.43373	-0.13989	-0.32771	-0.29354	-0.60864	0.03126	-0.33418	-0.30568	-0.91872	-0.44935	0.4274
1147	113.206013114605	23.3024478320644	725607.32731525	2578719.96921282	0		-0.40071	1.52631	0.46355	-0.07626	-0.59548	-1.12898	-0.99874	-0.50982	-0.62608	-0.50366	-0.60864	-0.40964	-0.49348	-0.71403	2.98094	1.69521	-0.01399
1148	113.231630000135	23.0855440431641	728596.78245683	2554735.70695326	4	1.38629	-0.65729	-0.43338	-0.46603	-0.89465	-0.08573	0.36414	-0.68004	0.87742	1.19729	-0.12845	-0.07949	-0.40964	-0.17488	-0.48743	-0.90185	-0.27695	-0.71167
1149	113.380521670084	23.2278145769563	743596.78245683	2570735.70695326	0		-0.47432	0.38357	-0.94499	1.26288	0.80831	0.96955	0.68404	-0.41734	-0.62608	-0.59371	-0.60864	-0.40964	-0.49348	2.11282	1.19328	0.73546	1.13738
1150	113.205763533176	23.2935649571374	725596.78245683	2577735.70695326	2	0.693147	-0.14042	0.50401	-0.14785	0.02559	0.61873	-1.12898	-0.99874	-0.50982	-0.62608	-0.59371	-0.60864	-0.40964	-0.49348	1.10844	2.44186	0.97971	0.18648
1151	113.232077580902	23.1126233886578	728596.78245683	2557735.70695326	2	0.693147	-0.47028	-0.77804	-1.00156	-0.29521	-0.41426	0.36414	-0.68004	0.59997	0.60055	-0.00838	-0.07949	0.47216	0.94022	-0.55918	-0.93478	-0.94326	-0.5239
1152	113.241536310544	23.0944322168979	729596.782456829	2555735.70695326	3	1.09861	-1.06481	-0.62107	-1.15953	-1.17232	-0.94122	0.36414	-0.68004	0.78494	0.6337	0.87712	0.27327	0.47216	0.46232	-0.92015	-0.68193	-0.72756	-0.80439
1153	113.194450421335	23.144138460167	724689.358912394	2561167.77255611	0		-0.40515	0.66654	0.74972	0.20319	-0.61544	-1.12898	-0.99874	-0.50982	-0.62608	-0.59371	-0.60864	-0.40964	-0.49348	-0.22794	0.01488	0.02227	-0.07137
1154	113.214490706938	23.2302426100034	726596.78245683	2570735.70695326	1	0	0.95823	-0.00351	-0.19403	1.56185	-0.59799	-1.12898	-0.99874	-0.32486	-0.22826	-0.36858	0.09689	-0.40964	-0.33418	-0.64611	-0.68313	-0.7038	-0.82861
1155	113.456010809715	23.0822126013152	751596.78245683	2554735.70695326	0		-0.96732	-0.89895	0.23155	0.02338	0.682	0.8542	1.33731	-0.50982	-0.62608	-0.53367	-0.60864	-0.40964	-0.49348	2.31914	-0.36357	-0.31504	0.74653
1156	113.261806960051	23.1392850618403	731596.782456829	2560735.70695326	9	2.19722	-1.05738	-0.79622	-0.85602	-0.97253	-0.4446	1.03026	1.28127	0.59997	0.99838	0.32181	0.44965	7.08565	0.14372	-1.002	-1.04069	-0.91476	-1.08456
1157	113.177170011006	23.2767300320889	722699.391897264	2575826.81780629	0		0.98407	1.73211	0.85244	2.91655	2.15204	-1.12898	-0.99874	-0.50982	-0.62608	-0.59371	-0.60864	-0.40964	-0.49348	2.67735	2.23197	3.31822	2.96264
1158	113.193880993663	23.1582104812177	724607.560454233	2562725.48733392	0		0.56575	-0.16098	0.45559	-0.15937	0.06584	-1.12898	-0.99874	0.32252	-0.42717	-0.50366	-0.07949	0.03126	-0.33418	-0.83051	-0.49264	-0.53221	0.36439
1159	113.313093276167	23.2829901343982	736596.782456831	2576735.70695326	5	1.60944	-0.21261	-0.2226	-0.15208	0.1879	-0.39162	-1.12898	-0.99874	-0.41734	-0.29456	0.14171	0.62603	-0.40964	-0.17488	-0.77692	-0.3877	-0.66537	-0.22758
1160	113.270959229848	23.1030399522346	732596.78245683	2556735.70695326	13	2.56495	-1.09726	-1.05473	-0.98274	-0.88098	-0.68515	0.96273	-0.43373	5.96397	4.28045	2.36295	3.27176	1.35396	3.80763	-0.87695	-0.91207	-0.90673	-1.11707
1161	113.396840835562	23.0470106392153	745596.78245683	2550735.70695326	0		-0.9154	-0.6929	-1.15309	-0.52569	0.27237	-1.11886	-0.77389	-0.32486	0.07011	-0.56369	-0.43226	-0.40964	-0.49348	-0.27315	-0.77752	-0.23902	-0.92067
1162	113.254165808317	23.2657916321689	730596.782456829	2574735.70695326	2	0.693147	-0.56494	-0.5426	-0.88107	0.518	-0.4862	-1.12898	-0.99874	-0.32486	-0.39402	-0.02339	-0.43226	-0.40964	-0.01558	-1.00046	0.4515	-0.53881	0.61438
1163	113.213118940171	23.0442309988977	726769.222244925	2550131.08248848	0		0.40942	0.52025	0.74189	-0.06875	-0.54931	0.36414	-0.68004	-0.50982	-0.59293	-0.56369	-0.60864	-0.40964	-0.49348	-0.92775	0.26667	0.5395	-0.68307
1164	113.223958740992	23.2120519196506	727596.78245683	2568735.70695326	0		-1.04594	-0.92874	-0.73235	-0.11344	-0.45699	-1.12898	-0.99874	-0.13989	0.23588	1.70258	3.80091	-0.40964	0.62162	-0.78611	-0.68938	-0.87318	-0.87114
1165	113.446582936844	23.1004142044137	750596.782456829	2556735.70695326	1	0	-0.35528	-0.92126	-1.13281	-0.60799	-0.52478	0.8542	1.33731	1.15487	1.49566	2.52804	0.9788	1.79486	2.53322	-0.88737	-0.91982	-0.87663	-1.01636
1166	113.319591105013	23.093304252552	737596.782456831	2555735.70695326	15	2.70805	-0.81891	0.20362	-1.13694	-0.95995	-0.77498	0.96273	-0.43373	1.24735	2.29131	3.99887	3.09538	2.23576	3.64833	-0.37745	-0.91384	-0.82999	-0.82456
1167	113.387247341347	23.056183746937	744596.78245683	2551735.70695326	0		-0.24044	-0.69681	-1.1119	-1.10916	-1.0187	-1.11886	-0.77389	-0.50982	-0.29456	-0.45863	-0.60864	-0.40964	-0.49348	-0.64936	-1.01689	-0.71815	-1.01961
1168	113.291855590024	23.1839920822547	734596.782456831	2565735.70695326	0		-0.8131	0.42788	-0.32159	0.29499	1.88508	-1.12898	-0.99874	-0.50982	-0.62608	-0.5787	-0.60864	0.47216	-0.49348	1.85326	-0.2729	-0.3589	1.03033
1169	113.389003889731	23.1554636192668	744596.78245683	2562735.70695326	2	0.693147	0.33979	0.20822	-0.28438	-0.24138	-0.73618	0.96955	0.68404	-0.41734	-0.32771	-0.53367	-0.25588	-0.40964	-0.49348	-0.80792	-0.16303	-0.18837	-0.60316
1170	113.244850337728	23.2930101585678	729596.782456829	2577735.70695326	7	1.94591	1.28296	0.40551	-0.12617	-0.30021	-0.48941	-1.12898	-0.99874	-0.41734	-0.49347	-0.36858	-0.43226	-0.40964	-0.49348	0.05523	1.53472	-0.3717	-0.37479
1171	113.233574400176	23.2028871429001	728596.78245683	2567735.70695326	0		-0.67082	-0.67737	-0.8664	-0.05501	-0.73794	-1.12898	-0.99874	0.32252	0.60055	0.62197	2.03709	0.03126	0.62162	-0.55254	-0.58234	-0.58842	-0.50159
1172	113.290933990538	23.1298360212788	734596.782456831	2559735.70695326	25	3.21888	-0.8219	-0.3763	-1.35402	-1.17764	-0.22101	1.03026	1.28127	2.44962	2.52338	0.72703	0.44965	4.44026	0.30302	-0.67626	-0.80153	-0.82881	-0.94964
1173	113.269746988595	23.0308299873187	732596.78245683	2548735.70695326	0		0.13971	-0.54773	0.80737	0.16555	-0.88516	-1.11886	-0.77389	-0.41734	-0.32771	-0.54868	-0.60864	-0.40964	-0.49348	-0.60741	-0.37847	0.32421	0.04771
1174	113.574957374126	23.1796136797109	763596.78245683	2565735.70695326	0		-0.63874	-0.06369	0.75896	-0.13204	-0.32069	0.8542	1.33731	-0.41734	-0.49347	-0.35357	-0.25588	-0.40964	-0.33418	0.11917	2.31882	-0.51991	0.42868
1175	113.432111036532	23.2631149559097	748812.505698882	2574733.54068148	0		1.10305	1.77666	0.42583	1.07351	1.30534	-1.12898	-0.99874	-0.50982	-0.62608	-0.5787	-0.60864	-0.40964	-0.49348	-0.26082	3.5212	2.19289	2.11846
1176	113.507133852208	23.2077906856708	756596.782456831	2568735.70695326	0		1.41954	1.15101	-0.43539	1.54494	2.75304	0.8542	1.33731	-0.32486	-0.62608	-0.59371	-0.60864	-0.40964	-0.49348	-0.33661	-0.09436	1.39324	0.21576
1177	113.241236847565	23.0763794065457	729596.782456829	2553735.70695326	7	1.94591	-0.72983	-0.68793	-1.19137	0.21977	-0.70041	0.36414	-0.68004	1.80225	0.73316	0.4869	0.44965	0.47216	0.14372	-0.16074	-0.85618	-0.57461	-0.63422
1178	113.252499511598	23.1665036367948	730596.782456829	2563735.70695326	3	1.09861	-0.81507	-0.5214	-1.04535	-1.11299	-0.56085	1.03026	1.28127	3.46693	2.95436	2.64811	2.56624	0.47216	1.57742	-0.71357	-0.61739	-0.93691	-0.9291
1179	113.215385888234	23.2844008376704	726596.78245683	2576735.70695326	4	1.38629	-1.02495	-0.74605	-1.0796	0.18706	0.19958	-1.12898	-0.99874	-0.50982	-0.59293	0.45688	-0.25588	-0.40964	-0.49348	0.18823	1.82208	-0.91696	0.10231
1180	113.426746138454	23.0826651865777	748596.782456829	2554735.70695326	1	0	-0.88036	-0.44997	-0.91778	0.23802	-0.52579	0.8542	1.33731	-0.41734	-0.55978	-0.44362	-0.43226	0.91306	-0.49348	-0.57828	-0.63166	-0.76284	-0.58878
1181	113.321145129622	23.1835627187379	737596.782456831	2565735.70695326	1	0	-0.77417	-0.06869	-1.12765	-0.37087	0.26814	-1.12898	-0.99874	1.33983	0.93207	2.51303	2.38985	-0.40964	1.89602	-0.48401	-0.80436	-0.83219	-0.89491
1182	113.536594380323	23.2163451300398	759596.782456829	2569735.70695326	2	0.693147	0.82844	0.99175	0.65836	0.93642	-0.22657	0.8542	1.33731	-0.50982	-0.62608	-0.59371	-0.60864	-0.40964	-0.49348	1.29749	1.03953	0.3834	0.3543
1183	113.429705764996	23.2522823400814	748586.44202586	2573529.45913846	0		1.83163	2.389	0.64983	1.34991	-0.29562	-1.12898	-0.99874	-0.50982	-0.62608	-0.59371	-0.60864	-0.40964	-0.49348	0.21512	2.86428	2.80887	1.70164
1184	113.311847795837	23.2107839506415	736596.782456831	2568735.70695326	0		0.24425	-0.09786	-0.38726	0.06173	0.24434	-1.12898	-0.99874	-0.41734	-0.62608	-0.59371	-0.60864	-0.40964	-0.49348	0.38479	-0.42725	-0.77326	0.4794
1185	113.309371789681	23.0663694082632	736596.782456831	2552735.70695326	3	1.09861	-0.56989	-0.30836	-0.07073	-0.55536	-0.37145	0.96273	-0.43373	0.32252	0.70001	1.23732	1.50794	0.91306	0.62162	-1.01745	-0.43977	-0.88198	-0.57361
1186	113.185188837874	23.2306529044313	723596.78245683	2570735.70695326	0		-0.04862	1.69545	1.14331	2.85707	-0.4383	-1.12898	-0.99874	-0.50982	-0.39402	-0.56369	-0.60864	-0.40964	-0.49348	2.28937	-0.17447	0.34062	0.62624
1187	113.35212961774	23.282368652003	740592.306901124	2576731.18145743	0		0.34076	0.52022	0.0439	-0.33643	-0.62687	-1.12898	-0.99874	-0.50982	-0.55978	-0.33856	-0.43226	-0.40964	-0.49348	-0.47189	-0.06986	-0.77784	-0.55559
1188	113.416668375762	23.0647642675159	747596.78245683	2552735.70695326	4	1.38629	0.19383	-0.53078	-1.1887	-0.76047	0.62086	0.8542	1.33731	-0.50982	-0.55978	-0.56369	-0.60864	-0.40964	-0.49348	-0.13928	-0.61037	-0.0777	-0.04693
1189	113.45551907465	23.0551375037609	751596.78245683	2551735.70695326	0		-0.65359	-0.64742	0.33306	0.60468	0.07775	-1.11886	-0.77389	-0.41734	-0.52663	-0.5787	-0.43226	-0.40964	-0.49348	0.751	0.6999	0.71864	-0.24432
1190	113.30798776997	22.9851349583601	736596.782456831	2543735.70695326	0		-1.03091	-0.77783	0.64305	0.49474	-0.31018	-1.11886	-0.77389	-0.32486	-0.39402	-0.06841	0.62603	-0.40964	-0.17488	-0.51402	-0.64314	-0.78949	-1.01587
1191	113.406753956602	23.0558878241549	746596.78245683	2551735.70695326	3	1.09861	-0.53674	-0.61862	-1.26025	-0.85095	-0.83966	-1.11886	-0.77389	-0.50982	-0.06249	-0.44362	-0.60864	1.35396	-0.49348	-1.01209	-0.27395	-0.58412	0.14799
1192	113.465930262296	23.0910854801088	752596.782456831	2555735.70695326	0		0.35983	-0.37302	-0.20885	0.12003	0.17372	0.8542	1.33731	-0.50982	-0.39402	-0.56369	-0.60864	-0.40964	-0.49348	0.34567	-0.57042	-0.27985	-0.46102
1193	113.569165427685	23.0843970426328	763189.523815212	2555177.20867976	0		1.45696	0.9178	1.82371	0.42946	0.59099	0.8542	1.33731	-0.50982	-0.62608	-0.59371	-0.60864	-0.40964	-0.49348	0.87718	0.5051	0.60476	1.9042
1194	113.387088136619	23.047158235882	744596.78245683	2550735.70695326	0		-0.10903	-0.95058	-1.12799	-1.09564	-0.11603	-1.11886	-0.77389	-0.50982	0.10327	-0.53367	-0.60864	0.91306	-0.49348	-1.11108	-0.46089	-0.24909	0.22941
1195	113.380681827221	23.2368399247281	743596.78245683	2571735.70695326	0		0.21438	1.34431	-0.39036	2.0679	0.07557	0.96955	0.68404	-0.50982	-0.62608	-0.59371	-0.60864	-0.40964	-0.49348	1.34809	1.74935	1.90628	2.46881
1196	113.467416535793	23.1723094572943	752596.782456831	2564735.70695326	37	3.61092	-0.99701	-0.89067	-0.96471	-0.68475	0.12672	0.8542	1.33731	-0.04741	0.10327	0.87712	0.62603	-0.40964	0.46232	-0.5859	-1.00052	-0.77418	-0.95089
1197	113.367109255106	23.0203746428575	742596.78245683	2547735.70695326	6	1.79176	-0.70308	-0.5336	0.00307	-0.63224	-0.58242	-1.11886	-0.77389	-0.13989	0.16957	0.35182	0.9788	-0.40964	-0.49348	-0.26002	-0.83937	-0.67258	-0.049
1198	113.369959460419	23.1828350204749	742596.78245683	2565735.70695326	3	1.09861	-0.96142	0.20479	-0.58771	-0.86794	-0.43142	0.96955	0.68404	-0.50982	-0.62608	-0.5787	-0.60864	0.03126	-0.33418	0.35757	-0.5928	-0.35617	-0.32851
1199	113.369482633369	23.1557585462381	742596.78245683	2562735.70695326	17	2.83321	0.78277	-0.36268	-1.06377	-1.08236	-0.30204	0.96955	0.68404	-0.41734	-0.39402	-0.54868	-0.43226	-0.40964	-0.49348	0.07778	-0.0616	0.35484	-0.35317
1200	113.448655186306	23.2439031973947	750541.664792646	2572633.8910262	0		2.26421	2.55258	-0.05681	0.47004	0.96444	-1.12898	-0.99874	-0.50982	-0.62608	-0.5787	-0.60864	-0.40964	-0.49348	1.61369	2.02299	1.85986	1.45263
1201	113.322706975051	23.2738200514923	737596.782456831	2575735.70695326	3	1.09861	-0.79345	-0.78174	0.54903	-0.11026	-0.81514	-1.12898	-0.99874	0.32252	0.10327	0.92214	0.44965	0.03126	0.62162	-0.26758	-0.87681	-0.82439	-0.41292
1202	113.545162138447	23.1530172832929	760596.782456829	2562735.70695326	34	3.52636	0.46579	0.33383	2.7615	-0.20871	-0.89005	0.8542	1.33731	-0.50982	-0.46032	-0.59371	-0.60864	-0.40964	-0.49348	-0.48049	1.6669	1.29103	0.73126
1203	113.526660641884	23.2074780457245	758596.782456831	2568735.70695326	0		0.35391	-0.52848	0.95114	1.56773	0.00298	0.8542	1.33731	-0.41734	-0.46032	-0.42861	-0.43226	0.03126	-0.33418	0.08263	1.01271	0.20827	-0.60861
1204	113.20802215501	23.1965689522504	725991.344492796	2566995.93615109	0		1.06176	-0.2579	-0.84469	-0.12792	-0.71611	-1.12898	-0.99874	-0.50982	-0.62608	-0.59371	-0.60864	-0.40964	-0.49348	-0.03174	-0.54139	0.48186	-0.83292
1205	113.341930430698	23.2554784059258	739596.782456831	2573735.70695326	0		-1.15712	-0.26366	-0.38879	-0.01134	0.03524	-1.12898	-0.99874	-0.50982	-0.62608	-0.59371	-0.60864	-0.40964	-0.49348	1.75907	0.28729	0.31004	0.44207
1206	113.278892447783	22.9945847135218	733596.782456831	2544735.70695326	3	1.09861	-0.63873	-0.17876	0.44449	0.12685	-0.08551	-1.11886	-0.77389	-0.41734	-0.42717	-0.44362	-0.60864	-0.40964	-0.49348	-0.66369	-1.02034	-0.57552	-0.34395
1207	113.260823963936	23.031175926521	731681.453869923	2548759.86686246	0		1.7214	0.35623	1.35931	-0.33321	-0.37513	-1.11886	-0.77389	-0.50982	-0.62608	-0.59371	-0.60864	-0.40964	-0.49348	0.17316	-0.63646	1.37267	-0.43164
1208	113.514537915187	23.0812911916348	757596.782456831	2554735.70695326	22	3.09104	-0.70105	-0.51924	0.29258	0.64801	-0.59658	0.8542	1.33731	0.13756	0.16957	0.18673	0.9788	0.03126	-0.17488	-0.75777	-0.83055	-0.87612	-0.80285
1209	113.437152708337	23.1186154230815	749596.782456829	2558735.70695326	7	1.94591	-0.55293	-0.20233	0.21415	-0.91564	-0.79807	0.8542	1.33731	-0.04741	-0.22826	-0.47364	-0.43226	-0.40964	-0.17488	-0.83482	-0.12341	0.2672	-0.41887
1210	113.311537205719	23.1927322912579	736596.782456831	2566735.70695326	0		-0.73412	-0.68236	-0.61699	0.32215	1.35056	-1.12898	-0.99874	-0.50982	-0.62608	-0.56369	-0.60864	-0.40964	-0.49348	1.78275	-0.18192	0.46219	0.81017
1211	113.495386751636	23.0646424187246	755665.510120624	2552857.79254254	0		2.06208	0.87491	0.84931	1.1326	1.18202	0.8542	1.33731	-0.50982	-0.62608	-0.59371	-0.60864	-0.40964	-0.49348	1.26246	0.08506	1.88659	1.35717
1212	113.262011202752	23.0227725291962	731817.543530883	2547830.98365895	4	1.38629	1.2438	0.81617	1.01113	0.43836	0.40344	-1.11886	-0.77389	-0.50982	-0.62608	-0.59371	-0.60864	-0.40964	-0.49348	1.66564	-0.45965	1.878	0.75799
1213	113.505453419363	23.1175448992853	756596.782456831	2558735.70695326	1	0	2.25603	1.082	0.95489	0.29956	-0.00951	0.8542	1.33731	-0.50982	-0.55978	-0.59371	-0.60864	-0.40964	-0.49348	1.40486	0.63645	0.41926	1.28747
1214	113.537412852126	23.2338174255062	759646.758522782	2571672.72023586	0		0.52714	1.80536	1.54348	1.9533	2.44547	0.8542	1.33731	-0.50982	-0.62608	-0.56369	-0.60864	-0.40964	-0.49348	3.90475	0.06182	1.35349	2.39914
1215	113.19453881057	23.0826467795994	724800.865095986	2554357.2208262	0		1.01384	0.02665	0.50716	0.05818	0.38246	0.36414	-0.68004	-0.50982	-0.62608	-0.5787	-0.60864	-0.40964	-0.49348	0.58676	-0.04348	-0.13561	0.14293
1216	113.328415038892	23.0390053005127	738596.782456831	2549735.70695326	1	0	-0.10327	-0.61764	1.09941	-0.00013	-0.80338	-1.11886	-0.77389	-0.41734	0.26903	0.29179	-0.43226	-0.40964	0.94022	-0.36951	-0.65304	-0.6813	-0.85585
1217	113.555723546179	23.2335488551427	761521.826283428	2571675.8569948	0		-0.29257	0.11805	0.99523	1.33798	1.21558	0.8542	1.33731	-0.50982	-0.62608	-0.59371	-0.60864	-0.40964	-0.49348	2.10707	0.84633	2.08601	1.19997
1218	113.32794981042	23.0119275245153	738596.782456831	2546735.70695326	4	1.38629	-1.11533	-0.0079	1.13215	-0.89578	-0.70156	-1.11886	-0.77389	0.87742	0.76631	1.7326	1.50794	-0.40964	1.57742	-0.09737	-0.56401	-0.90293	-0.86824
1219	113.241686155061	23.1034586052245	729596.782456829	2556735.70695326	23	3.13549	-0.88237	-0.8224	-0.92024	-0.92397	-0.19481	0.36414	-0.68004	-0.23238	0.43479	-0.11344	-0.60864	2.67666	-0.17488	-0.07506	-0.71499	-0.52115	-0.7152
1220	113.221440456005	23.0436839114693	727623.111789926	2550083.41554773	0		-0.57389	0.62016	0.7842	0.16094	-0.31163	0.36414	-0.68004	-0.41734	-0.62608	-0.5787	-0.60864	-0.40964	-0.49348	-0.06476	0.34745	0.1299	-0.29641
1221	113.399799698129	23.2690564158131	745494.712143954	2575336.57502308	0		1.14788	0.16608	1.37676	-0.24564	-0.60478	-1.12898	-0.99874	-0.50982	-0.62608	-0.59371	-0.60864	-0.40964	-0.49348	-0.25651	2.44168	0.49355	0.06136
1222	113.50444920576	23.0633968767238	756596.782456831	2552735.70695326	0		0.69774	0.30627	0.1846	0.35539	0.58252	0.8542	1.33731	-0.41734	-0.59293	-0.59371	-0.60864	-0.40964	-0.49348	-0.87849	0.11409	0.54864	0.13338
1223	113.241087229058	23.0673529845273	729596.782456829	2552735.70695326	6	1.79176	-0.9094	-0.43761	-0.49177	-0.37014	-0.29887	0.36414	-0.68004	1.06238	-0.09565	0.00663	1.50794	-0.40964	1.25882	0.04639	-0.74476	-0.75334	-1.07992
1224	113.309525957239	23.0753954019077	736596.782456831	2553735.70695326	4	1.38629	-0.75756	-0.78166	-0.08055	-0.03285	-0.56046	0.96273	-0.43373	-0.32486	0.60055	-0.5787	-0.60864	0.03126	-0.49348	-0.42807	-0.74161	-0.01658	-0.68026
1225	113.506292580962	23.1626679360691	756596.782456831	2563735.70695326	112	4.7185	-0.06744	-0.43675	1.89151	-0.474	-0.48978	0.8542	1.33731	-0.23238	-0.36086	-0.53367	-0.43226	-0.40964	-0.49348	-0.35166	-0.42442	-0.49737	-0.2964
1226	113.523955140036	23.0630864022872	758596.78245683	2552735.70695326	12	2.48491	0.68785	-0.59055	-1.09248	-0.86215	-0.72248	0.8542	1.33731	-0.23238	0.50109	-0.47364	-0.43226	0.47216	-0.17488	-0.78287	-0.99648	-0.69043	-0.86179
