# Supplementary material for: Investigation on spatiotemporal evolution and influencing factors of urban innovation space: a case study of Guangzhou
Source: Research Square preprint supplement (doi:10.21203/rs.3.rs-8356472/v1), 2026-01-16
Supplement: Supplementary file 3 [file Variable Definitions.docx]

**Variable Definitions**

| **Variable** | **Mean** | **Unit** | **Variable Interpretation** |
| --- | --- | --- | --- |
| SR | Scenic Resources | km | Distance from the center of the grid to the nearest scenic spot |
| PP | Public Park | km | Distance from the center of the grid to the nearest public park |
| UR | University Resources | km | Distance from the center of the grid to the nearest university |
| RI | Research Institutions | km | Distance from the center of the grid to the nearest scientific research institution |
| IP | Industrial Park | km | Distance from the center of the grid to the nearest scientific research institution |
| ISH | Industrial Structure Height | % | Share of tertiary production value in GDP of each administrative district in the grid |
| DOED | Degree of Economic Development | 10,000 yuan | Per capita GDP of each administrative district within the grid |
| LC | Living Convenience | piece | Number of residential communities within the grid |
| VC | Vehicle Carrying | piece | Number of parking lots in the grid |
| CAF | Catering and Food | piece | Number of catering facilities in the grid |
| SAC | Shopping and Consumption | piece | Number of supermarkets and shopping centres in the grid |
| BS | Bus Stops | piece | Number of bus stops in the grid |
| MS | Metro Station | piece | Number of metro stations within the grid |
| SEAC | Science, Education and Culture | km | Distance from the center of the grid to the nearest science, education and cultural facilities such as libraries, museums and exhibition centers |
| LE | Leisure  Entertainment | km | Distance from the centre of the grid to the nearest leisure and entertainment facilities such as cinema, theatre, KTV and bar |
| BH | Business Hotel | km | Distance from the centre of the grid to the nearest hotel |
| FC | Financial  Consulting | km | Distance from the centre of the grid to the nearest bank, investment and insurance facility |
