# Supplementary material for: Investigation on spatiotemporal evolution and influencing factors of urban innovation space: a case study of Guangzhou
Source: Research Square preprint supplement (doi:10.21203/rs.3.rs-8356472/v1), 2026-01-16
Supplement: Supplementary file 4 [file List of High-Tech Enterprises.xlsx]

## Sheet: 2008
Number	Company Name	Date of Establishment	Date of Approval	Industry Code (Category)	Industry Code (Major Category)	Industry Sector	Province	City	District	Address	Longitude	Latitude
1	广州广船国际股份有限公司	1994-10-21	2023-11-06	C	37	铁路、船舶、航空航天和其他运输设备制造业	广东省	广州市	海珠区	广州市海珠区革新路137号船舶大厦自编十五楼全层	113.261	23.0958
2	广州广日电气设备有限公司	1998-10-30	2023-10-10	C	38	电气机械和器材制造业	广东省	广州市	番禺区	广州市番禺区石楼镇国贸大道南636号之五	113.481	22.987
3	广州滚移时代网络有限公司 （曾用名：广州滚石移动网络有限公司）	2002-09-12	2021-08-18	I	64	互联网和相关服务	广东省	广州市	天河区	广州市天河区元岗路310号自编3栋C208单元（仅限办公用途）	113.347	23.1813
4	广州海鸥住宅工业股份有限公司 （曾用名：广州海鸥卫浴用品股份有限公司）	1998-01-08	2023-01-13	C	33	金属制品业	广东省	广州市	番禺区	广州市番禺区沙头街禺山西路363号	113.339	22.9415
5	瀚阳国际工程咨询有限公司 （曾用名：广州瀚阳工程咨询有限公司）	2005-11-22	2023-10-16	M	74	专业技术服务业	广东省	广州市	天河区	广州市天河区思成路23号宏太智慧谷七号楼2楼自编239A房	113.423	23.18
6	广州航新电子有限公司	1997-08-08	2021-06-01	C	40	仪器仪表制造业	广东省	广州市	黄埔区	广州市经济技术开发区科学城光宝路1号	113.426	23.1655
7	广州浩宇化工科技有限公司	2004-07-07	2021-02-05	M	73	研究和试验发展	广东省	广州市	白云区	广州市白云区太和镇广州民营科技园内广州863产业化促进中心大楼第601-602、609-610号房（仅作办公场所）	113.343	23.3025
8	广州合成材料研究院有限公司	1986-09-01	2021-09-01	C	26	化学原料和化学制品制造业	广东省	广州市	天河区	广州市天河区棠下车陂西路396号	113.387	23.1437
9	广州合立正通信息科技有限公司 （曾用名：广州合立正通信息网络集成有限公司）	1999-07-13	2021-01-21	I	65	软件和信息技术服务业	广东省	广州市	番禺区	广州市番禺区小谷围街青蓝街28号5栋602室、603室	113.394	23.0636
10	广州宏昌胶粘带厂	1992-07-02	2020-04-30	C	29	橡胶和塑料制品业	广东省	广州市	花都区	广州市花都区花山镇龙口村长布社工业路13号之一	113.267	23.4047
11	广州宏升太阳能科技有限公司	2001-10-18	2012-11-01	C	38	电气机械和器材制造业	广东省	广州市	花都区	广州市花都区新华街新华工业区瑞香路	113.176	23.4042
12	广州宏晟光电科技股份有限公司 （曾用名：广州宏晟光电科技有限公司）	2007-07-09	2020-08-25	C	40	仪器仪表制造业	广东省	广州市	从化区	广州市从化江埔街河东北路93号8栋	113.611	23.5517
13	招商华软信息有限公司 （曾用名：广州华工信息软件有限公司）	2001-10-22	2023-07-28	I	65	软件和信息技术服务业	广东省	广州市	黄埔区	广州高新技术产业开发区科学城科汇二街13号901房（仅限办公用途）	113.441	23.174
14	广州华南智信微系统有限公司	2002-06-12	2010-04-07	C	39	计算机、通信和其他电子设备制造业	广东省	广州市	白云区	广州市白云区沙太路华苑街18号大院内自编16号首层	113.337	23.1837
15	广州华炜科技有限公司	1998-05-15	2023-10-17	M	73	研究和试验发展	广东省	广州市	越秀区	广州市越秀区先烈中路69号1010房（仅限办公用途）	113.3	23.1424
16	广州华意电路有限公司	1991-05-07	2011-06-07	C	39	计算机、通信和其他电子设备制造业	广东省	广州市	增城区	广州增城市新塘太平洋工业区64号	113.582	23.1266
17	广州机床厂有限公司	1998-01-12	2023-04-13	C	34	通用设备制造业	广东省	广州市	番禺区	广州市番禺区大石街石北工业路620号办公楼	113.296	23.0203
18	广州机械科学研究院有限公司 （曾用名：广州机械科学研究院）	1994-08-15	2023-08-16	M	73	研究和试验发展	广东省	广州市	黄埔区	广州市黄埔区茅岗路828号	113.446	23.1239
19	广州吉必盛科技实业有限公司	2001-02-28	2023-03-07	C	26	化学原料和化学制品制造业	广东省	广州市	黄埔区	广州市高新技术产业开发区科学城南翔三路15号	113.455	23.1546
20	广州集泰化工股份有限公司 （曾用名：广州集泰化工有限公司）	2006-08-10	2021-11-25	C	26	化学原料和化学制品制造业	广东省	广州市	黄埔区	广州市高新技术产业开发区南翔一路62号自编六栋二楼、五楼（仅限办公用途）	113.46	23.1626
21	广州健新科技有限责任公司 （曾用名：广州健新自动化科技有限公司）	2005-04-06	2023-09-26	I	65	软件和信息技术服务业	广东省	广州市	黄埔区	广州市黄埔区联和街道光谱中路11号2栋1单元14层02-04单位	113.451	23.1663
22	广州江南科友科技股份有限公司	1991-04-04	2023-10-23	M	73	研究和试验发展	广东省	广州市	海珠区	广州高新技术产业开发区科学城科学大道162号创意大厦B3区第2层202单元	113.458	23.1699
23	中电科普天科技股份有限公司 （曾用名：广州杰赛科技股份有限公司）	1994-11-19	2023-10-30	E	49	建筑安装业	广东省	广州市	花都区	广州市花都区迎宾大道95号	113.233	23.4074
24	广州凯笙数字影像设备有限公司	2002-02-23	2017-12-13	I	65	软件和信息技术服务业	广东省	广州市	天河区	广州市天河区天河软件园软件路11号7楼711房	113.419	23.1773
25	广州科讯技术有限公司	2000-01-25	2017-04-14	M	74	专业技术服务业	广东省	广州市	天河区	广州市天河区中山大道89号B6层南3-4号	113.363	23.1409
26	广州科易光电技术有限公司	2003-02-11	2023-09-25	C	37	铁路、船舶、航空航天和其他运输设备制造业	广东省	广州市	黄埔区	广州市黄埔区科学城科珠路203号1101房	113.443	23.1702
27	广州科苑新型材料有限公司	1998-05-15	2018-11-12	C	29	橡胶和塑料制品业	广东省	广州市	花都区	广州市花都区狮岭镇旗岭大街3号第一工业园	113.229	23.4707
28	广州乐庚信息科技有限公司	2007-04-05	2023-09-19	M	74	专业技术服务业	广东省	广州市	黄埔区	广州市经济技术开发区科学城彩频路11号A栋608房	113.443	23.1679
29	广州立白企业集团有限公司	1998-02-25	2023-01-20	C	26	化学原料和化学制品制造业	广东省	广州市	荔湾区	广州市荔湾区陆居路二号	113.245	23.1074
30	广州联正达通信科技股份有限公司 （曾用名：广州联正达通信科技有限公司）	2003-10-21	2021-07-06	M	73	研究和试验发展	广东省	广州市	天河区	广州市天河区科韵北路108号3楼自编A32房	113.39	23.1661
31	广东美电贝尔科技集团股份有限公司 （曾用名：广州美电贝尔电业科技有限公司）	2004-04-19	2023-11-02	C	39	计算机、通信和其他电子设备制造业	广东省	广州市	天河区	广州市天河区思成路1号3层301号房	113.423	23.1784
32	广州敏视数码科技有限公司	2003-03-26	2021-07-01	C	39	计算机、通信和其他电子设备制造业	广东省	广州市	天河区	广州市天河区瑞华路1号6栋101	113.395	23.1263
33	广州南方测绘科技股份有限公司 （曾用名：广州南方测绘仪器有限公司）	1998-10-06	2023-06-14	M	73	研究和试验发展	广东省	广州市	天河区	广州市天河区思成路39号	113.429	23.1852
34	广州南科集成电子有限公司	2003-12-15	2020-08-10	C	38	电气机械和器材制造业	广东省	广州市	黄埔区	广州高新技术产业开发区科学城天丰路6号	113.466	23.1655
35	广州南珠电控技术有限公司	2003-04-17	2023-06-19	M	73	研究和试验发展	广东省	广州市	天河区	广州市天河区中山大道西140号1627房（仅限办公用途）（不可作厂房使用）	113.365	23.1397
36	广州白云山潘高寿药业股份有限公司 （曾用名：广州潘高寿药业股份有限公司）	1993-03-04	2023-09-14	M	73	研究和试验发展	广东省	广州市	番禺区	广州市番禺区东环街天保路11号	113.374	22.9746
37	广州擎天实业有限公司	1996-03-14	2023-03-27	M	73	研究和试验发展	广东省	广州市	花都区	广州市花都区狮岭镇裕丰路16号	113.223	23.471
38	广州诠星网络科技有限公司	2004-06-28	2022-08-09	I	65	软件和信息技术服务业	广东省	广州市	天河区	广州市天河区元岗路310号自编3栋C208之二单元（仅限办公用途）	113.347	23.1813
39	广州瑞信计算机科技有限公司	2002-10-18	2009-09-30	M	73	研究和试验发展	广东省	广州市	天河区	广州市天河区中山大道91号石牌科工贸小区B栋八层西南侧	113.377	23.1438
40	广州赛宝计量检测中心服务有限公司	2000-11-09	2023-02-03	C	40	仪器仪表制造业	广东省	广州市	增城区	广州市增城区朱村街朱村大道西78号9栋	113.69	23.2801
41	卫士通（广州）信息安全技术有限公司 （曾用名：广州三零盛安信息安全有限公司）	2005-03-15	2023-03-06	I	65	软件和信息技术服务业	广东省	广州市	天河区	广州市天河区天河直街30号A座3604-3606房（仅限办公用途）	113.326	23.141
42	广州商科信息科技有限公司	2005-01-13	2016-06-28	M	73	研究和试验发展	广东省	广州市	天河区	广州市天河区华夏路30号1205-1212房（不可作厂房用途）（仅限办公用途）	113.328	23.1318
43	广州安达精密工业股份有限公司 （曾用名：广州市安达汽车零件有限公司）	2003-05-12	2022-06-20	C	36	汽车制造业	广东省	广州市	白云区	广州市白云区太和镇（广州市民营科技园内）	113.305	23.3017
44	广州市澳大生物美容保健科技开发有限公司	1999-11-30	2018-09-30	M	73	研究和试验发展	广东省	广州市	越秀区	广州市越秀区解放北路980号地下自编16之三房	113.268	23.1445
45	广州市白云泵业集团有限公司	2001-04-13	2022-04-14	C	34	通用设备制造业	广东省	广州市	黄埔区	广州市黄埔区（中新广州知识城）九佛西路1395号	113.504	23.3875
46	广州市从化津晖电子厂 （曾用名：广州市白云区津晖电子厂）	2002-09-13	2017-03-02	C	36	汽车制造业	广东省	广州市	从化区	广东从化经济开发区福从路12号	113.511	23.453
47	广州市贝讯通信技术有限公司	2003-11-26	2021-07-12	I	65	软件和信息技术服务业	广东省	广州市	黄埔区	广州市黄埔区彩频路9号313房，314房	113.443	23.1684
48	广东波斯科技股份有限公司 （曾用名：广州市波斯塑胶颜料有限公司）	1998-10-23	2020-11-06	M	73	研究和试验发展	广东省	广州市	黄埔区	广州市萝岗区云庆路7号	113.542	23.1404
49	广东仟张信息技术有限公司 （曾用名：广州市铂亚计算机有限公司）	1999-08-20	2023-02-02	I	65	软件和信息技术服务业	广东省	广州市	番禺区	广州市番禺区番禺大道北555号番禺节能科技园内天安总部中心2号楼1201房	113.378	22.9848
50	广州市城市规划勘测设计研究院有限公司 （曾用名：广州市城市规划勘测设计研究院）	1998-04-23	2023-11-07	M	74	专业技术服务业	广东省	广州市	越秀区	广州市越秀区建设大马路10号	113.288	23.1412
51	广州市德威皮革制品有限公司	1995-01-03	2013-05-21	C	19	皮革、毛皮、羽毛及其制品和制鞋业	广东省	广州市	白云区	广州市白云区黄边北路向荣街64号（仅限作办公）	113.29	23.2309
52	广州地铁设计研究院股份有限公司 （曾用名：广州市地下铁道设计研究院）	1993-08-06	2022-07-05	M	74	专业技术服务业	广东省	广州市	越秀区	广州市越秀区环市西路204号	113.266	23.1513
53	广州市番禺华南摩托企业集团有限公司	1994-10-06	2016-07-14	C	37	铁路、船舶、航空航天和其他运输设备制造业	广东省	广州市	南沙区	广州市南沙区榄核镇民生工业区（榄核所）	113.346	22.8373
54	广东鑫泰科技集团有限公司 （曾用名：广州市番禺鑫泰科技有限公司）	2000-04-04	2022-09-23	C	39	计算机、通信和其他电子设备制造业	广东省	广州市	番禺区	广州市番禺区钟村街谢村村谢石公路狮江工业区	113.299	23.0179
55	广州市光机电技术研究院	2002-12-10	-	M	73	研究和试验发展	广东省	广州市	黄埔区	广州高新技术产业开发区科学城科研路3号	113.447	23.176
56	广州市海维饲料有限公司	2002-10-17	2021-12-02	C	13	农副食品加工业	广东省	广州市	番禺区	广州市番禺区石壁街韦涌村花园脚	113.268	22.9833
57	广州市好雨教育科技有限公司	2001-03-27	2021-10-14	M	73	研究和试验发展	广东省	广州市	黄埔区	广州高新技术产业开发区科学城科学大道162号创意大厦B2栋第4层411单元	113.457	23.1696
58	浩云科技股份有限公司 （曾用名：广州市浩云安防科技工程有限公司）	2001-03-08	2023-07-11	M	73	研究和试验发展	广东省	广州市	番禺区	广州市番禺区东环街番禺大道北555号天安总部中心22号楼101房	113.375	22.9874
59	广州市华软科技发展有限公司	1998-01-04	2023-09-21	I	65	软件和信息技术服务业	广东省	广州市	天河区	广州市天河区中山大道西89号C栋5层503房	113.363	23.1409
60	广州市健坤网络科技发展有限公司	2000-04-06	2023-02-24	I	65	软件和信息技术服务业	广东省	广州市	天河区	广州市天河区五山路省农业机械研究所办公楼A208--210室（本住所限写字楼功能）（不可作厂房使用）	113.352	23.1485
61	京华信息科技股份有限公司 （曾用名：广州市京华网络有限公司）	1993-01-03	2023-03-14	M	73	研究和试验发展	广东省	广州市	天河区	广州市天河区高普路138号京华信息大楼中座	113.416	23.1778
62	广州市灵讯通信科技有限公司	2003-05-26	2020-07-17	M	73	研究和试验发展	广东省	广州市	天河区	广州市天河区建中路64,66号西803房（仅限办公）	113.37	23.1288
63	广州市龙泰信息技术有限公司	2000-12-28	2017-02-21	M	73	研究和试验发展	广东省	广州市	天河区	广州市天河区天河科技园思成路1号北明软件大楼8楼自编802室（本住所限办公用途）	113.423	23.1789
64	广州市品高软件股份有限公司 （曾用名：广州市品高软件开发有限公司）	2003-01-01	2022-03-14	C	39	计算机、通信和其他电子设备制造业	广东省	广州市	天河区	广州市天河区软件路17号第G1栋（不可作厂房用途）	113.421	23.1784
65	广州市儒兴科技股份有限公司 （曾用名：广州市儒兴科技开发有限公司）	2000-07-03	2022-12-27	C	26	化学原料和化学制品制造业	广东省	广州市	黄埔区	广州市黄埔区瑞发路16号自编1栋	113.505	23.163
66	广州市三基网络科技有限公司	2004-11-12	2014-03-11	I	65	软件和信息技术服务业	广东省	广州市	天河区	广州市天河区天河路365号1205房	113.336	23.1397
67	广州市石磐石投资管理有限公司 （曾用名：广州市石磐石阻燃材料有限公司）	1999-08-02	2016-07-04	L	72	商务服务业	广东省	广州市	白云区	广州市白云区黄园路135号3栋1015房	113.274	23.2126
68	广东光大信息科技股份有限公司 （曾用名：广州市天河区光大科技发展有限公司）	1995-08-11	2023-03-06	I	65	软件和信息技术服务业	广东省	广州市	黄埔区	广州市萝岗区科学城彩频路7号之一402部位	113.442	23.1694
69	广州市天剑计算机系统工程有限公司	1996-12-11	2019-07-03	M	73	研究和试验发展	广东省	广州市	黄埔区	广州高新技术产业开发区彩频路9号801-3、801-4房	113.443	23.1684
70	广州天维信息技术股份有限公司 （曾用名：广州市天维数码技术有限公司）	2001-07-05	2022-07-22	I	65	软件和信息技术服务业	广东省	广州市	天河区	广州市天河区华观路1934号501房	113.412	23.1727
71	广州维力医疗器械股份有限公司 （曾用名：广州市韦士泰医疗器械有限公司）	2004-04-30	2023-08-15	C	35	专用设备制造业	广东省	广州市	番禺区	广州市番禺区化龙镇金湖工业城C区4号	113.464	23.0019
72	广州市未来之窗新材料股份有限公司	2002-06-04	2023-04-24	C	29	橡胶和塑料制品业	广东省	广州市	黄埔区	广州经济技术开发区东区骏达路118号	113.527	23.1462
73	新邮通信设备有限公司 （曾用名：广州市新邮通信设备有限公司）	2005-01-20	2017-07-24	C	39	计算机、通信和其他电子设备制造业	广东省	广州市	黄埔区	广州市高新技术产业开发区科学城彩频路3号	113.441	23.1682
74	广州市扬基信息科技有限公司	2004-09-07	2017-10-11	I	65	软件和信息技术服务业	广东省	广州市	天河区	广州市天河区龙口东路342-360号5层506-510房	113.348	23.148
75	广州医药研究总院有限公司 （曾用名：广州市医药工业研究所）	1992-09-28	2023-01-17	M	73	研究和试验发展	广东省	广州市	海珠区	广州市海珠区江南大道中134号	113.277	23.1121
76	广州优华过程技术有限公司 （曾用名：广州市优华过程技术有限公司）	2001-10-25	2023-04-26	M	74	专业技术服务业	广东省	广州市	天河区	广州市天河区体育西路189号城建大厦17G	113.327	23.145
77	广州市友迪资讯科技有限公司	2001-06-05	2021-03-19	M	74	专业技术服务业	广东省	广州市	天河区	广州市天河区车陂西路212号之一9楼9088房	113.391	23.1429
78	广州远正智能科技股份有限公司 （曾用名：广州市远正智能科技有限公司）	2004-08-01	2022-06-01	M	73	研究和试验发展	广东省	广州市	南沙区	广州市南沙区环市大道南路25号（自编3栋研发楼A2）栋4层（限办公用途）	113.531	22.8079
79	广州市云晟水处理技术有限公司 （曾用名：广州市云晟化工有限公司）	2002-06-19	2021-04-21	C	26	化学原料和化学制品制造业	广东省	广州市	黄埔区	广州市黄埔区掬泉路3号A栋205室	113.455	23.1687
80	广州市至高恒进科技有限公司	2001-07-04	2022-07-07	I	65	软件和信息技术服务业	广东省	广州市	天河区	广州市天河区天河路621号1001房之H11（仅限办公）	113.347	23.1412
81	广州市置安数码科技有限公司	2003-04-25	2023-04-17	M	73	研究和试验发展	广东省	广州市	天河区	广州市天河区天河路490号1905单元	113.342	23.1387
82	广州市中南民航空管通信网络科技有限公司	2004-09-22	2021-07-14	M	73	研究和试验发展	广东省	广州市	白云区	广州市白云区北太路1633号广州民营科技园科盛路8号配套服务大楼605-8房	113.342	23.302
83	广州视源电子科技股份有限公司 （曾用名：广州视源电子科技有限公司）	2005-12-28	2023-08-18	M	73	研究和试验发展	广东省	广州市	黄埔区	广州黄埔区云埔四路6号	113.533	23.1618
84	广州天王动物保健品有限公司	1995-07-13	2016-02-02	C	27	医药制造业	广东省	广州市	花都区	广州市花都区新华工业区	113.176	23.4042
85	广州万达信息技术有限公司	2005-04-29	2012-05-14	I	65	软件和信息技术服务业	广东省	广州市	黄埔区	广州高新技术产业开发区科学城科学大道111号科学城信息大厦主楼第7层701-6	113.445	23.172
86	广州王老吉药业股份有限公司	1992-12-05	2023-02-24	C	27	医药制造业	广东省	广州市	白云区	广州市白云区广花二路831号	113.251	23.2808
87	广州翔宇微电子有限公司	2004-09-21	2022-03-10	C	39	计算机、通信和其他电子设备制造业	广东省	广州市	海珠区	广州市海珠区广州大道南敦和路189号3号楼202房（仅限办公用）	113.326	23.0944
88	广州新展有机硅有限公司	1996-10-24	2014-11-25	C	26	化学原料和化学制品制造业	广东省	广州市	荔湾区	广州市荔湾区东沙街环翠北路（临时）25号	113.257	23.0675
89	广州逸信电子科技有限公司	2005-04-11	2017-08-28	M	73	研究和试验发展	广东省	广州市	黄埔区	广州高新技术产业开发区科学大道33号五栋3层之301、302、303、305、306、307	113.304	23.1477
90	广东因豪信息科技有限公司 （曾用名：广州因豪信息科技有限公司）	2003-02-20	2021-12-06	I	65	软件和信息技术服务业	广东省	广州市	天河区	广州市天河区天河南二路27号801房（仅限办公用途）	113.34	23.1384
91	广州银联网络支付有限公司	2001-12-13	2022-08-22	M	73	研究和试验发展	广东省	广州市	黄埔区	广州市高新技术产业开发区工业园建中路６１号	113.378	23.1292
92	广州银行电子结算中心	1998-06-17	2017-09-01	J	69	其他金融业	广东省	广州市	天河区	广州市天河区天河高新技术开发区工业园建中路55号	113.378	23.1299
93	广州优宝生物科技有限公司	2003-12-24	2019-05-22	C	14	食品制造业	广东省	广州市	黄埔区	广州高新技术产业开发区科学城香山路17号厂房A二层	113.446	23.1856
94	广州友益科技园有限公司 （曾用名：广州友益电子科技有限公司）	2002-01-09	2020-07-13	M	73	研究和试验发展	广东省	广州市	黄埔区	广州保税区保盈大道13号首层	113.537	23.0816
95	广州御银科技股份有限公司	2001-04-26	2023-07-26	C	39	计算机、通信和其他电子设备制造业	广东省	广州市	天河区	广州市天河区高唐路234号803房	113.41	23.1713
96	广州东俊瑞宝科技有限公司 （曾用名：广州裕立宝生物科技有限公司）	1999-04-13	2021-07-21	M	73	研究和试验发展	广东省	广州市	黄埔区	广州高新技术产业开发区科学城南云五路7号	113.46	23.1493
97	广州元亨计算机科技有限公司	2003-07-04	2023-08-29	I	65	软件和信息技术服务业	广东省	广州市	天河区	广州市天河区中山大道建工路19号首层	113.379	23.1282
98	广东正力通用电气有限公司 （曾用名：广州正力通用电气有限公司）	2000-11-14	2023-07-26	C	39	计算机、通信和其他电子设备制造业	广东省	广州市	番禺区	广州市番禺区大龙街市莲路沙涌村段金鳌街26号	113.432	22.9601
99	广东融海通担保有限公司 （曾用名：广州正有网络通信技术有限公司）	2004-09-02	2018-04-23	J	69	其他金融业	广东省	广州市	天河区	广州市天河区黄埔大道西100号富力盈泰广场A栋806室	113.341	23.1315
100	广州致远电子有限公司	2001-05-14	2022-12-13	C	40	仪器仪表制造业	广东省	广州市	天河区	广州市天河区软件园思成路43号第3层306房	113.429	23.1865
101	广州智光电气股份有限公司	1999-04-09	2023-05-18	M	73	研究和试验发展	广东省	广州市	黄埔区	广州市黄埔区埔南路51号	113.319	23.1246
102	广州智海信息科技有限公司	1998-06-19	2022-11-18	M	74	专业技术服务业	广东省	广州市	天河区	广州市天河区天河路518号901房（部位：自编A008单元）	113.343	23.1389
103	广州智能科技发展有限公司	1992-08-11	2021-01-14	I	65	软件和信息技术服务业	广东省	广州市	天河区	广州市天河区翰景路1号701房自编A、B、C、D、E、H、G（仅限办公）	113.353	23.1498
104	广州中大医药发展中心有限公司	2006-01-17	2016-06-08	M	73	研究和试验发展	广东省	广州市	海珠区	广州市海珠区新港西路135号大院中山大学南校区园西区705号楼中大科技园B座自编号1601房（仅作写字楼功能用）	113.297	23.0994
105	广州中大中鸣科技有限公司	1991-11-21	2023-10-19	M	73	研究和试验发展	广东省	广州市	越秀区	广州市越秀区小北路65号14层1406房（仅限办公）	113.278	23.1384
106	广州中浩控制技术有限公司	2002-06-06	2022-11-08	M	73	研究和试验发展	广东省	广州市	越秀区	广州市越秀区先烈中路100号大院15号整栋（部位：自编1-2楼全层）（不可作厂房使用）	113.306	23.1455
107	广州中环万代环境工程有限公司	2001-09-03	2022-04-18	E	49	建筑安装业	广东省	广州市	番禺区	广州市番禺区南村镇兴业大道东506号（商业楼）二楼203	113.391	23.0088
108	广州中科盛博信息技术有限公司	2002-01-28	2023-03-30	M	73	研究和试验发展	广东省	广州市	黄埔区	广州经济技术开发区科学城科珠路232号2栋505A房	113.445	23.1763
109	广州中望龙腾软件股份有限公司	1998-08-24	2023-10-27	I	65	软件和信息技术服务业	广东省	广州市	天河区	广州市天河区珠江西路15号32层自编01-08房	113.329	23.13
110	广州忠信世纪电子材料制造有限公司 （曾用名：广州忠信世纪玻纤有限公司）	2001-04-30	2021-12-27	C	39	计算机、通信和其他电子设备制造业	广东省	广州市	南沙区	广州市南沙区环市大道北3号	113.57	22.7599
111	广州珠江啤酒股份有限公司	2002-12-25	2023-06-05	C	15	酒、饮料和精制茶制造业	广东省	广州市	海珠区	广州市海珠区新港东路磨碟沙大街118号	113.34	23.112
112	广州珠源信息技术有限公司	2005-07-14	2022-03-30	M	73	研究和试验发展	广东省	广州市	天河区	广州市天河区天寿路105号801（仅限办公用途）	113.339	23.1538
113	广州市聚赛龙工程塑料股份有限公司 （曾用名：从化市聚赛龙工程塑料有限公司）	1998-01-21	2022-06-08	C	29	橡胶和塑料制品业	广东省	广州市	从化区	广州市从化鳌头镇龙潭聚宝工业区（村）	113.421	23.6584
114	海华电子企业（中国）有限公司	1984-12-05	2023-05-30	C	39	计算机、通信和其他电子设备制造业	广东省	广州市	黄埔区	广州市高新技术产业开发区科学城南翔二路23号	113.46	23.1599
115	宏昌电子材料股份有限公司	1995-09-28	2023-07-28	C	26	化学原料和化学制品制造业	广东省	广州市	黄埔区	广州市黄埔区开创大道728号3栋101房（部位：3栋212房）	113.54	23.1423
116	汇丰软件开发（广东）有限公司	2006-07-03	2023-10-11	I	65	软件和信息技术服务业	广东省	广州市	天河区	广州市天河区天河路381号太古汇办公楼2座22层	113.339	23.1402
117	广东捷科磁电系统有限公司 （曾用名：捷科门磁电系统（广东）有限公司）	1999-12-10	2023-08-09	C	38	电气机械和器材制造业	广东省	广州市	南沙区	广州市南沙区横沥镇合兴路38号	113.523	22.7536
118	越亮传奇科技股份有限公司 （曾用名：联想中望系统服务有限公司）	2002-12-12	2023-10-19	C	39	计算机、通信和其他电子设备制造业	广东省	广州市	天河区	广州市天河区天河北路898号信源大厦307-308房	113.352	23.1468
119	美晨集团股份有限公司	1993-08-24	2023-07-18	L	72	商务服务业	广东省	广州市	越秀区	广州市越秀区水荫路17号之二1楼	113.315	23.1421
120	分众传媒信息技术股份有限公司 （曾用名：七喜控股股份有限公司）	1997-08-26	2023-04-24	I	65	软件和信息技术服务业	广东省	广州市	黄埔区	广州市黄埔区腾飞一街2号605房（部位：6411）	113.487	23.1875
121	水利部珠江水利委员会技术咨询（广州）有限公司 （曾用名：水利部珠江水利委员会技术咨询中心）	1995-06-08	2022-06-02	N	76	水利管理业	广东省	广州市	天河区	广州市天河区天寿路80号14层	113.339	23.1501
122	佳都科技集团股份有限公司 （曾用名：新太科技股份有限公司）	2001-09-30	2023-09-22	M	73	研究和试验发展	广东省	广州市	番禺区	广州市番禺区东环街迎宾路832号番禺节能科技园内番山创业中心1号楼2区306房	113.37	22.9845
123	中科院广州电子技术有限公司	2001-12-30	2023-08-25	C	40	仪器仪表制造业	广东省	广州市	越秀区	广州市越秀区先烈中路100号大院23号	113.306	23.1455
124	广州达安基因股份有限公司 （曾用名：中山大学达安基因股份有限公司）	1988-08-17	2022-07-22	M	73	研究和试验发展	广东省	广州市	黄埔区	广州市高新技术产业开发区香山路19号	113.448	23.186
125	广东奥迪动漫玩具有限公司	2007-03-08	2022-05-31	C	24	文教、工美、体育和娱乐用品制造业	广东省	广州市	黄埔区	广州市黄埔区知文二街1号（自编A08）405室	113.487	23.1875
126	广东省南方环保生物科技有限公司	1987-12-15	2023-02-27	N	77	生态保护和环境治理业	广东省	广州市	黄埔区	广州市黄埔区黄埔大道东844号501房（自编号1）	113.476	23.1017
127	广东华讯工程有限公司	1999-02-05	2021-05-11	I	65	软件和信息技术服务业	广东省	广州市	天河区	广东省广州市天河区花城大道20号701房	113.324	23.1245
128	广州市希力电子科技有限公司	2006-04-12	2019-12-18	M	73	研究和试验发展	广东省	广州市	天河区	广州市天河区高普路1033号6层601室（仅限办公用途）	113.418	23.178
129	广州星业科技股份有限公司 （曾用名：广州市星业科技发展有限公司）	1997-03-18	2023-07-07	M	73	研究和试验发展	广东省	广州市	黄埔区	广州市经济技术开发区永和经济区沧海二路7号自编一栋至八栋	113.57	23.1865
130	广州秀珀化工涂料有限公司 （曾用名：广州秀珀化工股份有限公司）	1984-03-06	2021-08-12	C	26	化学原料和化学制品制造业	广东省	广州市	番禺区	广州市番禺区钟村镇谢石公路72号秀珀工业园	113.293	23.0011
131	广州易达建信科技开发有限公司	2001-11-05	2023-06-13	I	65	软件和信息技术服务业	广东省	广州市	天河区	广州市天河区天河北路892号13楼（仅限办公）	113.351	23.1471
132	迪爱生（广州）油墨有限公司	1994-05-20	2020-05-21	C	26	化学原料和化学制品制造业	广东省	广州市	黄埔区	广州经济技术开发区永和新庄二路77号	113.565	23.1985
133	广东用友软件有限公司	1994-05-06	2023-05-26	I	65	软件和信息技术服务业	广东省	广州市	越秀区	广东省广州市越秀区先烈中路83号505自编之一	113.306	23.1479
134	广东碧德生物科技有限公司	2002-10-25	2023-03-15	C	27	医药制造业	广东省	广州市	黄埔区	广州市萝岗区神舟路790号A-2三楼	113.451	23.1899
135	超讯通信股份有限公司 （曾用名：广东超讯通信技术有限公司）	1998-08-28	2023-09-08	C	39	计算机、通信和其他电子设备制造业	广东省	广州市	天河区	广州市天河区高普路1025号4楼401室	113.419	23.1788
136	广东德生科技股份有限公司 （曾用名：广东德生科技有限公司）	1999-08-13	2023-07-26	C	39	计算机、通信和其他电子设备制造业	广东省	广州市	天河区	广东省广州市天河区软件路15号第二层201室、三、四层	113.42	23.1773
137	广东迪美生物技术有限公司	2002-12-11	2022-03-25	C	27	医药制造业	广东省	广州市	黄埔区	广州市黄埔区瑞和路39号F1栋501房	113.511	23.158
138	广东高科力新材料有限公司	1999-12-23	2020-10-13	F	51	批发业	广东省	广州市	天河区	广东省广州市天河区东郊工业园建工路8号首层103室	113.379	23.1299
139	冠昊生物科技股份有限公司 （曾用名：广东冠昊生物科技股份有限公司）	1999-10-22	2019-07-04	C	27	医药制造业	广东省	广州市	黄埔区	广东省广州市黄埔区玉岩路12号	113.539	23.1762
140	广铝集团有限公司 （曾用名：广东广铝集团有限公司）	2002-11-08	2018-12-13	C	35	专用设备制造业	广东省	广州市	白云区	广州市白云区江高镇青云路55号	113.221	23.2743
141	广东广洋高科技股份有限公司	1995-03-21	2019-09-01	M	73	研究和试验发展	广东省	广州市	黄埔区	广州市经济技术开发区永和经济管理区新安自编号2号	113.569	23.2011
142	广东国光电子有限公司	2002-09-23	2021-03-03	C	38	电气机械和器材制造业	广东省	广州市	花都区	广州市花都区新雅街镜湖大道8号	113.256	23.3798
143	广东海大集团股份有限公司	2004-01-08	2021-08-25	M	73	研究和试验发展	广东省	广州市	番禺区	广东省广州市番禺区南村镇万博四路42号2座701	113.358	23.0167
144	广东恒联食品机械有限公司	2003-09-12	2022-06-28	C	34	通用设备制造业	广东省	广州市	番禺区	广州市番禺区石楼镇砺江路95号	113.494	22.9884
145	广东华南水电高新技术开发有限公司	1993-04-26	2022-11-29	M	73	研究和试验发展	广东省	广州市	天河区	广州市天河区天寿路105号901、902、903、904、905、1001、1002、1003、1004、1005、1006房	113.339	23.1538
146	广东环凯微生物科技有限公司	1993-09-06	2021-06-11	M	73	研究和试验发展	广东省	广州市	黄埔区	广州市萝岗区广州开发区科学城神舟路788号	113.451	23.1898
147	广东环天电子技术发展有限公司	1996-11-28	2023-03-16	F	51	批发业	广东省	广州市	荔湾区	广东省广州市荔湾区沙面大街64号201房	113.249	23.1133
148	广东寰球广业工程有限公司	1994-07-29	2023-07-10	M	74	专业技术服务业	广东省	广州市	天河区	广州市天河区黄埔大道中199号	113.355	23.131
149	广东汇香源生物科技股份有限公司	2002-12-05	2023-09-01	C	26	化学原料和化学制品制造业	广东省	广州市	黄埔区	广州市黄埔区埔北路6号自编二栋	113.543	23.1369
150	广东金腾电子有限公司	1995-10-25	2023-04-14	E	48	土木工程建筑业	广东省	广州市	天河区	广东省广州市天河区黄埔大道西路53号703、704房	113.369	23.1304
151	广东九博科技股份有限公司 （曾用名：广东九博电子科技有限公司）	2001-02-05	2020-07-21	C	39	计算机、通信和其他电子设备制造业	广东省	广州市	天河区	广东省广州市天河区思成路23号229室	113.423	23.18
152	广东骏丰频谱股份有限公司 （曾用名：广东骏丰频谱实业有限公司）	1995-04-24	2023-11-03	C	35	专用设备制造业	广东省	广州市	黄埔区	广东省广州市黄埔区骏丰路38号自编2栋	113.56	23.099
153	凯通科技股份有限公司 （曾用名：广东凯通软件开发有限公司）	2000-04-26	2023-09-01	I	65	软件和信息技术服务业	广东省	广州市	黄埔区	广东省广州市萝岗区开发区科汇三街12号1001房、1101房	113.443	23.1742
154	广东兰贝斯科技有限公司 （曾用名：广东兰贝斯信息科技有限公司）	1996-12-16	2021-09-17	M	73	研究和试验发展	广东省	广州市	天河区	广州市天河区林和中路156号6楼（部位：自编02、03单元）（不可作厂房使用）	113.333	23.1529
155	广东蓝图信息技术有限公司	2000-12-05	2023-08-17	I	65	软件和信息技术服务业	广东省	广州市	天河区	广州市天河区建中路62号4楼406号（仅限办公）	113.378	23.1291
156	广东明威专用汽车有限公司	1996-03-12	2021-10-21	C	36	汽车制造业	广东省	广州市	番禺区	广州市番禺区屏都路17号	113.299	22.965
157	广东铭鸿数据处理有限公司	1999-11-30	2022-03-18	I	65	软件和信息技术服务业	广东省	广州市	越秀区	广东省广州市越秀区五羊新城寺右新马路174号5楼B	113.319	23.1246
158	广东南方海岸科技服务有限公司	2001-07-09	2023-10-30	I	65	软件和信息技术服务业	广东省	广州市	黄埔区	广东省广州市萝岗区高新技术产业开发区科学城海云路88号办研大楼A-253号房	113.319	23.1246
159	广东南航电子商务有限公司 （曾用名：广东南航易网通电子商务有限公司）	2003-04-17	2023-07-03	I	64	互联网和相关服务	广东省	广州市	天河区	广州市天河区高普路1039号201-20室	113.418	23.177
160	广东启明教育发展有限公司	2007-03-01	2023-02-01	M	73	研究和试验发展	广东省	广州市	黄埔区	广州市萝岗区广州科学城天丰路3号自编402房	113.468	23.1661
161	广东省长讯实业有限公司	1993-01-14	2022-05-18	I	63	电信、广播电视和卫星传输服务	广东省	广州市	天河区	广州市天河区翰景路1号201房自编B2（仅限办公）	113.353	23.1498
162	中通服建设有限公司 （曾用名：广东省电信工程有限公司）	1986-12-05	2022-03-02	E	49	建筑安装业	广东省	广州市	越秀区	广州市越秀区原道路17号（道路货物运输代理仅限非首层办公用房经营）	113.299	23.1438
163	广东省电信规划设计院有限公司	1992-04-13	2023-04-11	I	63	电信、广播电视和卫星传输服务	广东省	广州市	天河区	广州市天河区中山大道华景路1号11-19层	113.364	23.1409
164	广州番禺电缆集团有限公司 （曾用名：广东省广州番禺电缆厂有限公司）	2000-04-11	2023-10-25	C	38	电气机械和器材制造业	广东省	广州市	番禺区	广州市番禺区南村镇	113.387	23.0095
165	广州东塑石油钻采专用设备有限公司 （曾用名：广东省广州石油机械厂）	1982-06-11	2023-02-17	C	35	专用设备制造业	广东省	广州市	番禺区	广州市番禺区沙湾镇大巷涌路107号	113.346	22.9047
166	广东省机械研究所	1992-07-04	1993-05-06	M	73	研究和试验发展	广东省	广州市	天河区	广州市天河区石牌	113.346	23.1452
167	广东省金稻种业有限公司	2001-09-13	2023-08-02	G	59	装卸搬运和仓储业	广东省	广州市	黄埔区	广东省广州市开发区永和经济区摇田河大街79号309室	113.569	23.2008
168	广东省前沿动物保健有限公司 （曾用名：广东省农科集团前沿动物保健有限公司）	1997-04-22	2023-09-08	M	73	研究和试验发展	广东省	广州市	白云区	广州市白云区钟落潭省农科院白云基地内	113.444	23.3931
169	广东省石油化工研究院	1992-04-08	2020-01-08	M	73	研究和试验发展	广东省	广州市	天河区	广州市天河区棠下车陂西路318号	113.39	23.1431
170	广东省信息工程有限公司	1987-08-01	2022-12-21	E	50	建筑装饰、装修和其他建筑业	广东省	广州市	黄埔区	广东省广州市黄埔区科学大道50号自编A3栋1401房	113.438	23.1708
171	数安时代科技股份有限公司 （曾用名：广东数字证书认证中心有限公司）	2013-04-02	2021-06-09	M	73	研究和试验发展	广东省	广州市	越秀区	广州市越秀区越华路112号3001房号（自编01.02）单元	113.274	23.1361
172	广东水电二局股份有限公司	2001-12-27	2023-08-09	E	48	土木工程建筑业	广东省	广州市	增城区	广东省广州市增城区新塘镇广深大道西1号1幢水电广场A-1商务中心20层	113.607	23.1281
173	广东塑料交易所有限公司	2004-03-23	2019-05-16	L	72	商务服务业	广东省	广州市	荔湾区	广东省广州市荔湾区东沙大道广州圆路1号广州圆大厦7楼	113.264	23.0569
174	广东太平洋互联网信息服务有限公司	2002-11-27	2022-08-11	I	64	互联网和相关服务	广东省	广州市	天河区	广州市天河区高普路115号1栋301房	113.421	23.1825
175	广东天辰生物技术有限公司	1996-01-23	2023-03-28	M	73	研究和试验发展	广东省	广州市	黄埔区	广州市萝岗区广州科学城神舟路788号A-2办公楼一楼101室	113.451	23.1898
176	广东天普生化医药股份有限公司	1993-03-25	2023-03-15	C	27	医药制造业	广东省	广州市	天河区	广州市天河区天河高唐科技产业园高普路８９号	113.418	23.1901
177	广东同益空气能科技股份有限公司 （曾用名：广东同益电器有限公司）	1999-06-09	2021-05-19	M	75	科技推广和应用服务业	广东省	广州市	荔湾区	广州市荔湾区桥中中路159号二十层2001-2010房（仅限办公）	113.224	23.1351
178	广东拓奇电力技术发展有限公司	1994-09-28	2022-09-15	M	74	专业技术服务业	广东省	广州市	黄埔区	广州市黄埔区科学城科汇发展中心科汇三街6号六楼（仅限办公）	113.443	23.1735
179	威创集团股份有限公司 （曾用名：广东威创视讯科技股份有限公司）	2002-08-23	2023-09-21	C	39	计算机、通信和其他电子设备制造业	广东省	广州市	黄埔区	广州高新技术产业开发区科珠路233号	113.444	23.1758
180	广东新大禹环境科技股份有限公司 （曾用名：广东新大禹环境工程有限公司）	1997-05-13	2021-11-25	N	77	生态保护和环境治理业	广东省	广州市	黄埔区	广东省广州市开发区科学城科汇二街17号101房	113.441	23.1745
181	广东鑫程电子科技有限公司	2005-11-22	2016-12-06	M	74	专业技术服务业	广东省	广州市	黄埔区	广州市高新技术产业开发区科学大道111号主楼201自编之7房	113.304	23.1477
182	广东旭普空间信息技术产业发展有限公司	2002-04-01	2022-06-20	I	65	软件和信息技术服务业	广东省	广州市	天河区	广州市天河区高普路38号4栋105房（仅限办公）	113.417	23.1914
183	广东迅通计算机有限公司	1996-08-19	2019-09-01	M	73	研究和试验发展	广东省	广州市	越秀区	广州市越秀区先烈中路80号12层	113.302	23.1426
184	广东易美图影像科技股份有限公司 （曾用名：广东易美图数码影像科技有限公司）	2000-08-15	2021-07-28	M	75	科技推广和应用服务业	广东省	广州市	黄埔区	广州市黄埔区科学城天泰一路2号5栋306室	113.469	23.1668
185	广东永顺生物制药股份有限公司 （曾用名：广东永顺生物制药有限公司）	2002-12-24	2023-05-23	C	27	医药制造业	广东省	广州市	黄埔区	广东省广州市黄埔区田园西路35号	113.551	23.2008
186	广东宇天科技有限公司 （曾用名：广东宇天信通通信科技有限公司）	2006-01-27	2022-05-18	I	65	软件和信息技术服务业	广东省	广州市	天河区	广州市天河区中山大道西6、8号第16-17层自编1606号	113.373	23.1403
187	广东粤微食用菌技术有限公司	1998-11-16	2022-01-12	C	14	食品制造业	广东省	广州市	黄埔区	广州市黄埔区（广州高新技术产业开发区）神舟路792号	113.451	23.1898
188	广东智慧电子信息产业股份有限公司	1999-04-15	2020-08-07	C	39	计算机、通信和其他电子设备制造业	广东省	广州市	黄埔区	广州市黄埔区中新广州知识城凤凰一路78号	113.559	23.3285
189	广东中大讯通软件科技有限公司	2001-08-29	2019-09-01	M	73	研究和试验发展	广东省	广州市	黄埔区	广东省广州市萝岗区伴河路96号自编一栋第4层	113.518	23.1595
190	广东中实通信技术有限公司	2001-05-21	2011-01-18	M	75	科技推广和应用服务业	广东省	广州市	天河区	广州市天河区五山路1号华晟大厦17楼	113.349	23.1423
191	广东中玉科技有限公司	2004-06-14	2013-07-05	I	65	软件和信息技术服务业	广东省	广州市	番禺区	广州市番禺区钟村镇屏山二村（2号办公楼）二楼	113.353	22.9636
192	广州亨龙智能装备股份有限公司 （曾用名：广州（从化）亨龙机电制造实业有限公司）	1997-04-17	2023-01-05	C	34	通用设备制造业	广东省	广州市	从化区	广州市从化区太平镇新一路63号	113.306	23.0213
193	广州爱奇实业有限公司	2002-07-10	2020-03-13	C	24	文教、工美、体育和娱乐用品制造业	广东省	广州市	增城区	广州市增城区中新镇新新路2号	113.623	23.2762
194	广州五所环境仪器有限公司 （曾用名：广州爱斯佩克环境仪器有限公司）	1995-11-06	2022-05-16	C	40	仪器仪表制造业	广东省	广州市	增城区	广州市增城朱村街朱村大道西76号	113.687	23.2862
195	奥格科技股份有限公司 （曾用名：广州奥格智能科技有限公司）	2002-07-15	2022-08-05	M	74	专业技术服务业	广东省	广州市	天河区	广州市天河区高普路1029、1031号201室（仅限办公）	113.419	23.1784
196	广州白云电器设备股份有限公司	1989-07-05	2023-04-11	C	38	电气机械和器材制造业	广东省	广州市	白云区	广州市白云区神山镇大岭南路18号	113.209	23.3414
197	广州白云山和记黄埔中药有限公司	2005-04-12	2022-06-09	C	27	医药制造业	广东省	广州市	白云区	广州市白云区沙太北路389号	113.344	23.2021
198	广州白云山明兴制药有限公司	1962-12-27	2020-07-06	C	27	医药制造业	广东省	广州市	海珠区	广州市海珠区工业大道北48号	113.261	23.1021
199	广州白云山天心制药股份有限公司	1993-01-28	2020-07-14	C	27	医药制造业	广东省	广州市	海珠区	广州市海珠区滨江东路808号	113.316	23.108
200	广州邦讯信息系统有限公司	2003-09-17	2023-08-23	M	73	研究和试验发展	广东省	广州市	天河区	广州市天河区天河软件园高普路1029、31号4层	113.419	23.1783
201	北明软件有限公司 （曾用名：广州北大明天资源科技发展有限公司）	1998-03-31	2023-09-07	I	65	软件和信息技术服务业	广东省	广州市	天河区	广州市天河区思成路1号北明软件大楼7、8层	113.423	23.1789
202	广州北羊信息技术有限公司	1998-04-16	2022-03-24	G	53	铁路运输业	广东省	广州市	越秀区	广州市越秀区白云路2号首层	113.288	23.1229
203	广州彼岸思精光电系统有限公司	2003-11-19	2022-11-03	M	73	研究和试验发展	广东省	广州市	越秀区	广州市越秀区寺右新马路111-115号2523室（不可作厂房使用）	113.32	23.1265
204	博创智能装备股份有限公司 （曾用名：广州博创机械有限公司）	2002-12-26	2023-03-30	C	35	专用设备制造业	广东省	广州市	增城区	广州市增城区新塘镇新祥路9号	113.638	23.173
205	广州博冠信息科技有限公司	2003-12-08	2023-11-09	C	35	软件和信息技术服务业	广东省	广州市	天河区	广州市天河区科韵路16号自编第5栋801、901（仅限办公用途，不可作厂房）	113.378	23.1314
206	广州长川科技有限公司	2003-12-16	2018-05-22	C	35	研究和试验发展	广东省	广州市	黄埔区	广州市高新技术产业开发区科学城香山路3号三层	113.444	23.1789
207	广州晨新自控设备有限公司	2002-10-09	2016-08-03	C	35	专用设备制造业	广东省	广州市	黄埔区	广州高新技术产业开发区科学城开源大道11号B4栋一至二层	113.502	23.1594
208	广州城市信息研究所有限公司	1999-03-08	2022-02-24	M	73	研究和试验发展	广东省	广州市	天河区	广州市天河区建中路64、66号东三层	113.377	23.1287
209	广州城网信息发展有限公司	2000-03-20	2016-07-11	I	65	软件和信息技术服务业	广东省	广州市	越秀区	广州市越秀区越华路185号南塔第六层自编602房	113.278	23.1377
210	从兴技术有限公司 （曾用名：广州从兴电子开发有限公司）	1999-09-20	2022-07-25	I	65	软件和信息技术服务业	广东省	广州市	越秀区	广州市越秀区寺右新马路174号14楼自编A	113.319	23.1246
211	广州达元食品安全技术有限公司	2005-03-09	2022-07-28	M	73	研究和试验发展	广东省	广州市	黄埔区	广州高新技术产业开发区科学城开源大道11号A1栋第六层602房	113.502	23.1594
212	广州迪克医疗器械有限公司	2004-03-03	2022-10-26	C	35	专用设备制造业	广东省	广州市	黄埔区	广州经济技术开发区科学城广州国际企业孵化器A区A601	113.454	23.1685
213	广州电子口岸管理有限公司	2005-02-08	2023-09-21	I	65	软件和信息技术服务业	广东省	广州市	黄埔区	广州市黄埔区黄埔大道东983号501-532房	113.476	23.1017
214	广州东芝白云电器设备有限公司	2002-02-26	2023-02-27	C	38	电气机械和器材制造业	广东省	广州市	白云区	广州市白云区江高镇神山工业区大岭南路18号	113.209	23.3414
215	广州东芝白云菱机电力电子有限公司	2004-02-12	2023-05-31	C	38	电气机械和器材制造业	广东省	广州市	白云区	广州市白云区江高镇神山管理区大岭南路18号	113.209	23.3414
216	广州飞达音响有限公司 （曾用名：广州飞达音响专业器材有限公司）	1994-06-22	2023-09-28	C	39	计算机、通信和其他电子设备制造业	广东省	广州市	花都区	广州市花都区炭步飞达工业园	113.125	23.3609
217	广州菲奈特信息科技有限公司	2007-07-24	2013-06-06	C	39	计算机、通信和其他电子设备制造业	广东省	广州市	天河区	广州市天河区中山大道西建中路44号2楼	113.38	23.1342
218	广州丰江电池新技术股份有限公司 （曾用名：广州丰江电池新技术有限公司）	2006-09-25	2022-06-30	C	38	电气机械和器材制造业	广东省	广州市	南沙区	广州市南沙区东涌镇细沥村（厂房二)(厂房三）	113.459	22.8401
219	广州丰江微电子有限公司	2000-09-30	2023-08-31	C	39	计算机、通信和其他电子设备制造业	广东省	广州市	南沙区	广州市南沙区东涌镇太石工业区万泰路50号	113.41	22.8948
220	广州富通光科技术有限公司	1998-12-22	2022-11-04	M	73	研究和试验发展	广东省	广州市	黄埔区	广州高新技术产业开发区科学城揽月路80号广州科技创新基地E区第二层201、203-205单元	113.459	23.1654
221	广州关键光电子技术有限公司	2000-04-17	2023-09-12	C	39	计算机、通信和其他电子设备制造业	广东省	广州市	黄埔区	广州经济技术开发区沙湾二街13、15号第一层	113.537	23.0719
222	广电运通集团股份有限公司 （曾用名：广州广电运通金融电子股份有限公司）	1999-07-08	2023-11-03	J	69	其他金融业	广东省	广州市	黄埔区	广州市高新技术产业开发区科学城科林路9、11号	113.442	23.166
223	广州广哈通信股份有限公司 （曾用名：广州广哈通信有限公司）	1995-04-08	2023-07-06	C	39	计算机、通信和其他电子设备制造业	广东省	广州市	黄埔区	广州市高新技术产业开发区科学城南云一路16号	113.45	23.1569
224	广州广日电梯工业有限公司	1982-06-23	2023-10-27	C	43	金属制品、机械和设备修理业	广东省	广州市	番禺区	广州市番禺区石楼镇国贸大道南636号	113.481	22.987
225	广州广有通信设备有限公司	2002-12-30	2023-01-11	C	39	计算机、通信和其他电子设备制造业	广东省	广州市	海珠区	广州市海珠区敦和路173号	113.324	23.0948
226	广州国联通信有限公司	1998-09-23	2020-05-27	M	73	研究和试验发展	广东省	广州市	黄埔区	广州高新技术产业开发区科学城彩频路7号之一401	113.442	23.166
227	广州海格通信集团股份有限公司	2000-07-20	2022-12-20	M	73	研究和试验发展	广东省	广州市	黄埔区	广州市高新技术产业开发区科学城海云路88号	113.454	23.1494
228	广东天海花边有限公司 （曾用名：广州海日花边有限公司）	2003-02-28	2021-02-02	C	17	纺织业	广东省	广州市	黄埔区	广州经济技术开发区联广路213号	113.535	23.1264
229	广州航天海特系统工程有限公司 （曾用名：广州海特天高信息系统工程有限公司）	1997-05-13	2021-12-27	E	48	土木工程建筑业	广东省	广州市	天河区	广州市天河区天慧路3号广州互联网产业园B501	113.423	23.1827
230	广州海维空间信息系统技术有限公司	2002-07-03	2014-05-19	I	65	软件和信息技术服务业	广东省	广州市	天河区	广州市天河区龙口东路342-360号天诚广场裙楼3层301-302号	113.347	23.148
231	广州航新航空科技股份有限公司 （曾用名：广州航卫计算机科技有限公司）	2005-11-23	2023-06-29	C	37	铁路、船舶、航空航天和其他运输设备制造业	广东省	广州市	黄埔区	广州市经济技术开发区科学城光宝路1号	113.426	23.1655
232	广州皓竹软件有限公司	2006-10-24	2022-10-27	I	65	软件和信息技术服务业	广东省	广州市	天河区	广州市天河区天河北路559号2302自编B15（仅限办公）	113.342	23.1475
233	广州合诚三先生物科技有限公司	2001-09-23	2022-11-29	M	73	研究和试验发展	广东省	广州市	黄埔区	广州市萝岗区云埔工业区云诚路8号之一	113.535	23.1538
234	广州合诚实业有限公司	2003-08-11	2022-07-01	C	14	食品制造业	广东省	广州市	黄埔区	广州市萝岗区云埔工业区云诚路8号	113.552	23.1482
235	广州合晟科技有限公司	2017-10-12	2020-08-10	M	75	科技推广和应用服务业	广东省	广州市	番禺区	广州市番禺区沙头街大平村禺山西路260-302号双号二楼A277-2	113.344	22.9431
236	广州赫尔普复合材料科技有限公司	2003-07-22	2017-12-18	C	21	家具制造业	广东省	广州市	黄埔区	广州经济技术开发区永和经济区永顺大道西6号	113.553	23.2065
237	广州赫尔普化工有限公司	2002-03-18	2023-02-01	C	26	化学原料和化学制品制造业	广东省	广州市	黄埔区	广州市黄埔区石化路１７０号	113.476	23.1107
238	广州恒宇智能系统科技有限公司	2005-05-10	2023-02-13	M	73	研究和试验发展	广东省	广州市	白云区	广州市白云区太和镇永兴东路一横街8号之一	113.267	23.306
239	广州红帆科技有限公司 （曾用名：广州红帆电脑科技有限公司）	1998-01-24	2023-01-18	I	65	软件和信息技术服务业	广东省	广州市	天河区	广州市天河区水荫路115号311房、312房、313房（仅限办公）	113.318	23.1496
240	广州宏仁电子工业有限公司	1996-03-20	2023-10-08	C	39	计算机、通信和其他电子设备制造业	广东省	广州市	黄埔区	广州市黄埔区开创大道728号3栋202房号	113.54	23.1423
241	广州华工百川科技有限公司 （曾用名：广州华工百川科技股份有限公司）	2000-12-18	2021-10-15	I	65	软件和信息技术服务业	广东省	广州市	黄埔区	广州市萝岗区玉岩路华立街3号	113.54	23.1753
242	广州华工环源绿色包装技术股份有限公司 （曾用名：广州华工环源绿色包装技术有限公司）	2000-09-07	2022-12-06	M	74	专业技术服务业	广东省	广州市	天河区	广州高新技术产业开发区科学城科汇四街1号1101-2房	113.444	23.1734
243	广州华工信元通信技术有限公司	2001-03-07	2023-04-06	I	65	软件和信息技术服务业	广东省	广州市	天河区	广州市天河区华南理工大学26号楼附楼	113.352	23.1561
244	广州华南资讯科技有限公司	2000-06-08	2023-04-24	I	65	软件和信息技术服务业	广东省	广州市	天河区	广州市天河区中山大道西高新工业区建中路12号	113.379	23.1326
245	广州华研精密机械股份有限公司 （曾用名：广州华研精密机械有限公司）	2002-05-13	2022-10-13	C	35	专用设备制造业	广东省	广州市	增城区	广州市增城区宁西街创立路6号	113.627	23.1831
246	广东华银医药科技有限公司 （曾用名：广州华银医药科技有限公司）	2004-11-12	2020-11-06	M	73	研究和试验发展	广东省	广州市	黄埔区	广州高新技术产业开发区科学城揽月路80号广州科技创新基地C区第三层	113.457	23.1657
247	广州化工研究设计院	1993-01-13	2021-09-29	C	26	化学原料和化学制品制造业	广东省	广州市	白云区	广州市白云区石井石潭路潭村桥东	113.239	23.1932
248	广州黄金高德教育科技有限责任公司 （曾用名：广州黄金高德教育研究有限公司）	2004-04-23	2021-09-27	M	73	研究和试验发展	广东省	广州市	天河区	广州市天河区龙口西路1号A梯1108房	113.343	23.14
249	广州汇智通信技术有限公司	1999-06-30	2023-01-17	M	75	科技推广和应用服务业	广东省	广州市	天河区	广州市天河区中山大道西109号大院自编1号楼14楼（仅限办公用途）	113.373	23.1403
250	广州慧谷化学有限公司	1999-10-11	2022-07-05	C	26	化学原料和化学制品制造业	广东省	广州市	黄埔区	广州经济技术开发区新业路62号	113.291	23.0706
251	广州新拓科技投资有限公司 （曾用名：广州慧扬科技投资有限公司）	2005-01-10	2019-10-17	I	65	软件和信息技术服务业	广东省	广州市	海珠区	广州市海珠区梅园南路探梅桥街1号自编27（仅限办公用途）	113.285	23.1126
252	广州健迅科技有限公司	2000-08-15	2021-01-18	M	73	研究和试验发展	广东省	广州市	越秀区	广州市越秀区东风西路191号自然层十四层1610-11自编1612-18部位	113.261	23.1394
253	广州交信投科技股份有限公司 （曾用名：广州交通信息化建设投资营运有限公司）	2003-08-08	2023-08-08	I	65	软件和信息技术服务业	广东省	广州市	黄埔区	广州市黄埔区科汇三街12号501房	113.443	23.1742
254	广州捷宝电子科技股份有限公司 （曾用名：广州捷宝电子科技发展有限公司）	2006-06-08	2023-09-22	M	73	研究和试验发展	广东省	广州市	天河区	广州市经济技术开发区骏业路257号第三栋306号	113.524	23.1413
255	广东图腾征信有限公司 （曾用名：广州金电图腾软件有限公司）	1997-02-26	2023-03-09	I	65	软件和信息技术服务业	广东省	广州市	天河区	广州市天河区建中路55，57号六楼	113.379	23.1327
256	广州金关节能科技发展有限公司	2003-10-27	2023-10-27	M	73	研究和试验发展	广东省	广州市	海珠区	广州市海珠区江南大道南1158号804房（仅限办公）	113.339	23.0922
257	广州良源贸易发展有限公司 （曾用名：广州金南磁塑有限公司）	1991-01-14	2019-11-30	F	51	批发业	广东省	广州市	增城区	广州市增城区增江街纬五路4号5栋3楼309房	113.855	23.2798
258	广州金诺电子科技有限公司	2004-09-21	2015-12-07	C	39	计算机、通信和其他电子设备制造业	广东省	广州市	白云区	广州市白云区九佛镇九佛西路623号自编之一	113.492	23.4149
259	广州金鹏科技信息系统有限公司	2003-04-02	2021-06-23	I	63	电信、广播电视和卫星传输服务	广东省	广州市	黄埔区	广州高新技术产业开发区神舟路9号二楼南面	113.438	23.1753
260	广州多益网络股份有限公司 （曾用名：广州金山多益网络科技有限公司）	2006-07-14	2021-09-28	M	73	研究和试验发展	广东省	广州市	黄埔区	广州市萝岗区伴河路90号自编一栋301房	113.518	23.1588
261	广州金升阳科技有限公司	1998-07-10	2022-06-22	M	73	研究和试验发展	广东省	广州市	黄埔区	广州市黄埔区南云四路8号	113.458	23.1519
262	广州金拓电子有限公司	1995-09-08	2021-02-02	C	39	计算机、通信和其他电子设备制造业	广东省	广州市	天河区	广州市天河区建中路55-57号6楼	113.378	23.1299
263	广州金域医学检验中心有限公司	2003-04-28	2023-07-24	M	74	专业技术服务业	广东省	广州市	黄埔区	广州市黄埔区国际生物岛螺旋三路10号	113.378	23.0651
264	广州白云山敬修堂药业股份有限公司 （曾用名：广州敬修堂（药业）股份有限公司）	1992-12-01	2022-11-04	M	73	研究和试验发展	广东省	广州市	荔湾区	广州市荔湾区人民南路179号	113.259	23.1201
265	广州聚能纳米生物科技股份有限公司 （曾用名：广州聚能生物科技有限公司）	2005-02-28	2023-09-15	M	73	研究和试验发展	广东省	广州市	黄埔区	广州市高新技术产业开发区科学城起云路8号自编四栋一楼102	113.435	23.1738
266	广州凯恒科塑有限公司	2001-04-04	2020-04-14	C	38	电气机械和器材制造业	广东省	广州市	黄埔区	广州市萝岗区广汕路长安148号凯恒科技园	113.459	23.1974
267	广州康臣药业有限公司	1997-12-29	2022-12-05	C	27	医药制造业	广东省	广州市	黄埔区	广州萝岗区经济技术开发区东区东鹏大道７１号	113.53	23.136
268	广州康瑞德生物技术股份有限公司	2000-08-18	2023-10-16	M	73	研究和试验发展	广东省	广州市	黄埔区	广州市高新技术产业开发区科学城崖鹰石路8号	113.426	23.6574
269	广州康盛生物科技股份有限公司 （曾用名：广州康盛生物科技有限公司）	2001-04-05	2022-07-21	M	73	研究和试验发展	广东省	广州市	黄埔区	广州高新技术产业开发区科学城神舟街8号	113.452	23.1916
270	广州科凌新技术有限公司	1999-03-30	2015-01-06	M	75	科技推广和应用服务业	广东省	广州市	天河区	广州市天河区中国科学院广州能源研究所五山所区内	113.358	23.1588
271	广州拓尔思大数据有限公司 （曾用名：广州科韵信息股份有限公司）	2001-12-20	2022-06-01	I	64	互联网和相关服务	广东省	广州市	天河区	广州市天河区科韵路天河软件园科韵园区建中路51-53号第2层（仅限办公）	113.381	23.1288
272	广州蓝科科技股份有限公司	2000-11-09	2017-08-28	M	74	专业技术服务业	广东省	广州市	越秀区	广州市越秀区文德北路69号东方文德九层902单元	113.279	23.129
273	广州合协软件技术有限公司 （曾用名：广州朗新合协软件技术有限公司）	2006-09-11	2021-05-31	I	65	软件和信息技术服务业	广东省	广州市	黄埔区	广州市黄埔区起云路8号4栋501房	113.435	23.1738
274	广州雷迅防雷技术有限公司	2003-04-14	2012-08-14	M	73	研究和试验发展	广东省	广州市	天河区	广州市天河区中山大道西215号自编A209房	113.373	23.1403
275	亚钾国际投资（广州）股份有限公司 （曾用名：广州冷机股份有限公司）	1998-10-27	2023-04-10	M	74	专业技术服务业	广东省	广州市	南沙区	广州市南沙区万顷沙镇红安路3号	113.574	22.6577
276	广州立达尔生物科技股份有限公司 （曾用名：广州立达尔生物科技有限公司）	2001-06-07	2022-01-06	C	13	农副食品加工业	广东省	广州市	天河区	广州市高新技术产业开发区科学城科学大道182号C2区第三层302单元	113.461	23.172
277	广州励丰文化科技股份有限公司 （曾用名：广州励丰声光科技有限公司）	1997-07-30	2023-07-03	R	88	文化艺术业	广东省	广州市	黄埔区	广州市高新技术产业开发区科学城科学大道8号自编一至六栋	113.426	23.1708
278	广州励进新技术有限公司	2001-01-22	2017-12-05	I	65	软件和信息技术服务业	广东省	广州市	花都区	广州市花都区新华工业区大布路40号	113.173	23.42
279	联奕科技股份有限公司 （曾用名：广州联奕信息科技有限公司）	2004-07-05	2022-07-18	I	65	软件和信息技术服务业	广东省	广州市	天河区	广州市天河区科韵路16号自编1栋501	113.378	23.1314
280	广东亮美集照明科技有限公司 （曾用名：广州亮而丽灯饰有限公司）	2001-08-14	2018-05-28	C	38	电气机械和器材制造业	广东省	广州市	花都区	广州市花都区花东镇先科一路3号（可作厂房使用）	113.37	23.4505
281	融捷股份有限公司 （曾用名：广州路翔股份有限公司）	1998-08-21	2022-12-01	M	73	研究和试验发展	广东省	广州市	天河区	广州市天河区珠江西路5号4504房、4505房（仅限办公用途）	113.329	23.1238
282	广州绿色盈康生物工程有限公司	1993-08-04	2023-10-10	M	75	科技推广和应用服务业	广东省	广州市	海珠区	广州市海珠区新港西路135号大院中大蒲园区628栋中大科技园A座自编1108B房（仅限办公用途）	113.298	23.0991
283	广州洛图终端技术有限公司	2000-07-03	2021-01-04	C	39	计算机、通信和其他电子设备制造业	广东省	广州市	番禺区	广州市番禺区南村镇江南工业二区二横路1号之一4栋401室	113.372	23.0014
284	广州麦普实业有限公司	2003-05-16	2023-03-22	C	39	计算机、通信和其他电子设备制造业	广东省	广州市	黄埔区	广州市萝岗区天泰一路2号自编六栋三、四层	113.469	23.1668
285	广州美络信息科技有限公司	2003-04-30	2022-05-10	I	65	软件和信息技术服务业	广东省	广州市	越秀区	广州市越秀区环市东路498号22B房	113.315	23.1403
286	广州明动软件股份有限公司 （曾用名：广州明动软件有限公司）	2004-12-23	2023-03-22	I	65	软件和信息技术服务业	广东省	广州市	天河区	广州市天河区白沙水路89号1-2层	113.357	23.1839
287	广东铭太信息科技有限公司 （曾用名：广州铭太信息科技有限公司）	2006-09-28	2022-09-15	I	65	软件和信息技术服务业	广东省	广州市	天河区	广州市天河区元岗路310号自编6栋E601、E602、E603单元（仅限办公）	113.347	23.1813
288	广州摩讯计算机科技有限公司	2002-09-05	2022-01-12	M	74	专业技术服务业	广东省	广州市	越秀区	广州市越秀区中山一路57号903-904房（仅限办公用途）	113.315	23.1336
289	广州南方电力集团科技发展有限公司	1999-08-30	2023-05-26	E	49	建筑安装业	广东省	广州市	海珠区	广州市海珠区江南大道穗花南街一号	113.283	23.1019
290	广州南天电脑系统有限公司	1992-01-20	2023-01-12	C	39	计算机、通信和其他电子设备制造业	广东省	广州市	天河区	广州市天河区建工路１号南天大厦五楼	113.38	23.13
291	广州普什精密模具有限公司	2003-06-05	2010-05-13	C	34	通用设备制造业	广东省	广州市	天河区	广州市天河区天河北890号国际科贸大厦12楼	113.351	23.1471
292	广州白云山奇星药业有限公司 （曾用名：广州奇星药业有限公司）	1993-12-31	2023-06-13	C	27	医药制造业	广东省	广州市	海珠区	广州市海珠区新港中路赤岗北路33号	113.334	23.1051
293	广州日宝钢材制品有限公司	1994-02-25	2023-08-28	C	32	有色金属冶炼和压延加工业	广东省	广州市	番禺区	广州市番禺区钟村万宝基地万宝中二街8号	113.31	22.9983
294	日立楼宇技术（广州）有限公司 （曾用名：广州日滨科技发展有限公司）	2000-12-15	2023-05-25	M	75	科技推广和应用服务业	广东省	广州市	黄埔区	广州高新技术产业开发区科学城南翔三路2号	113.447	23.1543
295	广州软动智软计算机科技有限公司	2002-05-10	2010-09-21	M	75	科技推广和应用服务业	广东省	广州市	越秀区	广州市越秀区先烈中路102号北塔25层08、10、12、14、16房	113.307	23.1472
296	广州锐得森特种陶瓷科技有限公司	2004-07-02	2019-09-18	M	73	研究和试验发展	广东省	广州市	白云区	广州市白云区北太路1633号广州民营科技园科盛路8号配套服务大楼623-7房	113.342	23.302
297	广州瑞达通信技术有限公司	1995-03-06	2013-03-25	C	39	计算机、通信和其他电子设备制造业	广东省	广州市	天河区	广州天河区华利路19号2楼自编206房	113.323	23.1239
298	广州飒特红外股份有限公司 （曾用名：广州飒特电力红外技术有限公司）	1998-06-26	2022-09-09	C	39	计算机、通信和其他电子设备制造业	广东省	广州市	黄埔区	广州经济技术开发区港前工业区东江大道10号	113.529	23.0538
299	广州赛唯热工设备有限公司	1999-09-23	2021-11-25	C	34	通用设备制造业	广东省	广州市	番禺区	广州市番禺区石楼镇创启路63号创启13号楼（仅限办公用途）	113.465	22.9826
300	广州赛意信息科技股份有限公司 （曾用名：广州赛意信息科技有限公司）	2005-01-10	2023-11-08	M	73	研究和试验发展	广东省	广州市	天河区	广州市天河区珠江东路12号1601（部位：自编03-05单元）	113.334	23.1254
301	广州三瑞医疗器械有限公司	1992-12-11	2020-08-24	C	18	纺织服装、服饰业	广东省	广州市	天河区	广州市天河区高科路38号5楼	113.416	23.1931
302	广州三业科技有限公司	1999-06-01	2022-05-25	M	73	研究和试验发展	广东省	广州市	越秀区	广州市越秀区先烈中路83号501自编之十二（仅限办公使用）（不可作厂房使用）	113.306	23.1479
303	广州石竹计算机软件有限公司	2002-08-26	2022-10-31	I	65	软件和信息技术服务业	广东省	广州市	天河区	广州市天河区天河北路559号2303自编C25房（仅限办公）	113.342	23.1475
304	广州市埃特斯通讯设备有限公司	2001-06-26	2023-03-02	C	39	计算机、通信和其他电子设备制造业	广东省	广州市	黄埔区	广州高新技术产业开发区科学城开源大道11号B2栋第三层	113.442	23.166
305	广东安居宝数码科技股份有限公司 （曾用名：广州市安居宝数码科技有限公司）	2004-12-29	2023-06-02	M	74	专业技术服务业	广东省	广州市	黄埔区	广州高新技术产业开发区科学城起云路6号自编一栋	113.434	23.173
306	广州市安普华德创新科技有限公司	2000-05-15	2020-11-16	M	73	研究和试验发展	广东省	广州市	天河区	广州市天河区黄埔大道中路259号二楼207房	113.379	23.1267
307	广州市安泰化学有限公司	1989-01-18	2019-10-15	C	26	化学原料和化学制品制造业	广东省	广州市	天河区	广州市天河区东郊工业园建工路８号海旺工业大厦首层	113.379	23.1299
308	广州市奥杰信息技术有限公司	1999-09-09	2016-07-26	I	65	软件和信息技术服务业	广东省	广州市	天河区	广州市天河区龙口东路34号1401房自编1409单元	113.348	23.1432
309	广州澳视互动传媒有限公司 （曾用名：广州市澳视光电子技术有限公司）	1998-10-22	2017-01-03	M	73	研究和试验发展	广东省	广州市	黄埔区	广州经济技术开发区科学城光谱西路3号厂房二楼西边南部	113.425	23.1648
310	广州白云科技股份有限公司 （曾用名：广州市白云化工实业有限公司）	2000-02-02	2023-08-18	C	26	化学原料和化学制品制造业	广东省	广州市	白云区	广州市白云区广州民营科技园云安路1号	113.34	23.3076
311	广东白云清洁股份有限公司 （曾用名：广州市白云清洁用品有限公司）	1999-05-17	2022-07-01	C	38	电气机械和器材制造业	广东省	广州市	白云区	广州市白云区神山大道西363号	113.2	23.339
312	广州市邦普电脑技术开发有限公司	2000-08-21	2022-06-24	C	39	计算机、通信和其他电子设备制造业	广东省	广州市	黄埔区	广州高新技术产业开发区南翔三路11号自编8栋	113.452	23.1547
313	广州市昊志机电股份有限公司 （曾用名：广州市大族高精电机有限公司）	2006-12-14	2023-09-07	C	34	通用设备制造业	广东省	广州市	黄埔区	广州市黄埔区禾丰路68号	113.572	23.2156
314	广州市道明化学有限公司	1990-04-06	2021-10-12	C	26	化学原料和化学制品制造业	广东省	广州市	天河区	广州市天河区建中路62号五楼（本住所仅限办公功能）（不可作厂房使用）	113.378	23.1291
315	广州市电信设计有限公司	1986-07-24	2011-09-13	I	63	电信、广播电视和卫星传输服务	广东省	广州市	天河区	广州市天河区陶育路78号	113.351	23.1345
316	广州市东门子电业制造有限公司	2001-07-13	2009-09-14	C	39	计算机、通信和其他电子设备制造业	广东省	广州市	荔湾区	广州市荔湾区花溪路9号电子（数码）基地A1幢、B幢	113.246	23.0844
317	广州市东洋科技有限公司	1999-11-01	2016-12-28	M	73	研究和试验发展	广东省	广州市	黄埔区	广州高新技术产业开发区广州科学城科学大道182号C1区第八层801	113.304	23.1477
318	广州市动景计算机科技有限公司	2005-03-10	2023-07-07	M	73	研究和试验发展	广东省	广州市	天河区	广州市天河区高普路38号303房305房306房307房308房（仅限办公）	113.417	23.1914
319	广州市动意信息技术有限公司	2004-06-21	2022-06-15	I	65	软件和信息技术服务业	广东省	广州市	越秀区	广州市越秀区华乐路青菜东街35号501-511房之503自编G03室	113.294	23.1391
320	广东奥迪威传感科技股份有限公司 （曾用名：广州市番禺奥迪威电子有限公司）	1999-06-23	2023-05-16	M	73	研究和试验发展	广东省	广州市	番禺区	广州市番禺区沙头街银平路3街4号	113.357	22.9617
321	广州市大川饲料有限公司 （曾用名：广州市番禺区大川饲料有限公司）	2000-01-07	2023-03-03	C	13	农副食品加工业	广东省	广州市	南沙区	广州市南沙区东涌镇西樵村	113.396	22.8908
322	广州市番禺区珠江灯光音响实业有限公司	1993-12-30	2019-12-25	C	39	计算机、通信和其他电子设备制造业	广东省	广州市	番禺区	广州市番禺区大石街河村迎宾路段179号	113.342	23.0174
323	方欣科技有限公司 （曾用名：广州市方欣科技有限公司）	1998-07-17	2023-10-17	I	65	软件和信息技术服务业	广东省	广州市	黄埔区	广州市黄埔区科学大道82-88号（双号）（C3）栋901房	113.436	23.1689
324	广州市丰华生物股份有限公司 （曾用名：广州市丰华生物工程有限公司）	1999-01-08	2022-11-30	M	73	研究和试验发展	广东省	广州市	黄埔区	广州经济技术开发区银谊街6号	113.522	23.0651
325	广州市高科通信技术股份有限公司	1995-09-22	2022-11-09	M	73	研究和试验发展	广东省	广州市	天河区	广州市天河区高普路168号	113.416	23.1753
326	广州高澜节能技术股份有限公司 （曾用名：广州市高澜水技术有限公司）	2001-06-29	2023-06-16	M	73	研究和试验发展	广东省	广州市	黄埔区	广州市高新技术产业开发区科学城南云五路3号	113.459	23.1481
327	广州市高士实业有限公司	1999-06-15	2022-07-13	C	26	化学原料和化学制品制造业	广东省	广州市	白云区	广州市白云区广花三路360号1栋、2栋、3栋、C栋、F栋、G栋	113.248	23.3009
328	广州市光时代科技有限公司	1999-04-28	2016-06-12	C	39	计算机、通信和其他电子设备制造业	广东省	广州市	天河区	广州市天河区五山路246、248、250号金山大厦101自编102部位	113.353	23.1497
329	高新兴国迈科技有限公司 （曾用名：广州市国迈科技有限公司）	2005-08-18	2023-09-08	I	64	互联网和相关服务	广东省	广州市	黄埔区	广州市黄埔区开创大道2819号2号楼701	113.464	23.181
330	广州市汉粤净化科技有限公司	2003-12-16	2020-07-22	M	73	研究和试验发展	广东省	广州市	番禺区	广州市番禺区东环街蔡边一工业开发区	113.393	22.9764
331	合诚技术股份有限公司 （曾用名：广州市合诚化学有限公司）	1996-04-17	2022-06-24	C	26	化学原料和化学制品制造业	广东省	广州市	天河区	广州市天河区珠江西路17号广晟国际大厦603-604	113.33	23.1308
332	广州市恒力检测股份有限公司 （曾用名：广州市恒力安全检测技术有限公司）	2006-01-18	2023-09-01	M	73	研究和试验发展	广东省	广州市	黄埔区	广州市黄埔区西成中街10号F栋101房	113.516	23.0834
333	广州市红日燃具有限公司	1981-04-20	2021-04-22	C	38	电气机械和器材制造业	广东省	广州市	白云区	广州市白云区江高镇神山大道东650号	113.225	23.3345
334	鸿利智汇集团股份有限公司 （曾用名：广州市鸿利光电子有限公司）	2004-05-31	2021-12-03	M	73	研究和试验发展	广东省	广州市	花都区	广州市花都区花东镇先科一路1号	113.367	23.4511
335	广州市花都联华包装材料有限公司	2001-06-27	2023-08-16	C	23	印刷和记录媒介复制业	广东省	广州市	花都区	广州市花都区狮岭镇旗岭圩旗岭大街79号	113.232	23.4723
336	广州市花都全球自动变速箱有限公司	2000-03-31	2023-06-27	C	36	汽车制造业	广东省	广州市	花都区	广州市花都区107国道铁道桥西侧A幢	113.277	23.2243
337	广州罡网防务科技有限公司 （曾用名：广州市华标信息技术有限公司）	2003-10-29	2023-07-13	M	75	科技推广和应用服务业	广东省	广州市	越秀区	广州市越秀区白云路38号901房自编902房	113.291	23.125
338	广州市华德工业有限公司	1997-09-03	2022-04-19	C	36	汽车制造业	广东省	广州市	黄埔区	广州高新技术产业开发区科学城南翔三路9号	113.451	23.1552
339	广州市华南橡胶轮胎有限公司	1988-12-03	2023-07-14	C	29	橡胶和塑料制品业	广东省	广州市	番禺区	广州市番禺区大石街石北工业路620号办公楼	113.296	23.0203
340	广州市环境保护工程设计院有限公司	1990-09-26	2023-05-15	E	48	土木工程建筑业	广东省	广州市	越秀区	广州市越秀区迴龙路增沙街20号2，3楼	113.275	23.1223
341	金医慧通科技有限公司 （曾用名：广州市慧通计算机有限公司）	1997-04-10	2022-07-14	F	52	零售业	广东省	广州市	天河区	广州市天河区兴国路21号20楼01-10房	113.336	23.1213
342	广州市暨华医疗器械有限公司	2000-05-10	2023-10-17	C	35	专用设备制造业	广东省	广州市	天河区	广州市天河区新塘田头岗工业区二大道一横路2号A栋二楼东	113.421	23.1739
343	广州市今健医疗器械有限公司	1997-06-03	2017-12-01	C	35	专用设备制造业	广东省	广州市	黄埔区	广州高新技术产业开发区科学城开源大道11号A6栋第二、四层	113.502	23.1594
344	金税信息技术服务股份有限公司 （曾用名：广州市金税信息系统集成有限公司）	2003-08-04	2021-05-11	I	65	软件和信息技术服务业	广东省	广州市	天河区	广州市天河区明旭街1号524房	113.369	23.1304
345	广州市金禧信息技术服务有限公司	2000-06-22	2022-08-18	I	65	软件和信息技术服务业	广东省	广州市	天河区	广州市天河区东莞庄一横路133号自编7号楼601室（仅限办公）	113.346	23.1576
346	广东精一信息技术有限公司 （曾用名：广州市精一规划勘测科技有限公司）	2002-03-05	2023-10-31	I	65	软件和信息技术服务业	广东省	广州市	天河区	广州市天河区天河科技园高新技术产业开发区首期工业园建工路9号5楼北区502、504、506、508、510、512、516、518号	113.379	23.1294
347	广州久邦数码科技有限公司	2003-06-04	2022-05-24	I	65	软件和信息技术服务业	广东省	广州市	越秀区	广州市越秀区中山三路33号A塔1701房（自编）“中华国际中心”A塔17楼1703-1、1704-1706、1708、1707单元	113.289	23.1317
348	广州市炬元互联网科技有限公司 （曾用名：广州市炬元通讯技术有限公司）	2003-03-31	2021-12-30	I	65	软件和信息技术服务业	广东省	广州市	黄埔区	广州市黄埔区科学大道111号主楼404-1房	113.445	23.1721
349	广州市聚晖电子科技有限公司	2004-04-22	2013-11-27	C	39	计算机、通信和其他电子设备制造业	广东省	广州市	黄埔区	广州市萝岗区玉树工业园敬业四街D栋301房	113.44	23.1627
350	广州市科教电脑网络有限公司	1995-03-14	2020-03-26	I	65	软件和信息技术服务业	广东省	广州市	天河区	广州市天河区天河北路898号3308室	113.352	23.1471
351	广州市科利亚农业机械有限公司	2003-02-10	2016-08-18	C	34	通用设备制造业	广东省	广州市	增城区	广州市增城区永宁街新和北路34号（增城经济技术开发区核心区内）	113.64	23.1774
352	广州鹿山新材料股份有限公司 （曾用名：广州市鹿山化工材料有限公司）	1998-11-12	2023-10-12	M	73	研究和试验发展	广东省	广州市	黄埔区	广州市黄埔区云埔工业区埔北路22号自编1栋、自编2栋、自编3栋、自编4栋	113.545	23.1377
353	广州市路由通讯技术有限公司	2000-04-12	2020-07-03	M	73	研究和试验发展	广东省	广州市	越秀区	广州市越秀区寺右新马路八号之一	113.312	23.1258
354	广东芬尼克兹节能设备有限公司 （曾用名：广州市密西雷电子有限公司）	2002-04-16	2021-12-29	M	73	研究和试验发展	广东省	广州市	南沙区	广州市南沙区大岗镇天元路3号（自编1栋）	113.397	22.8048
355	广州市敏嘉制造技术有限公司	2001-04-11	2018-03-06	C	34	通用设备制造业	广东省	广州市	南沙区	广州市南沙区东涌镇大稳村稳发路35号	113.44	22.8985
356	广州市诺信数字测控设备有限公司	2002-08-05	2016-03-11	C	35	专用设备制造业	广东省	广州市	黄埔区	广州市萝岗区云骏路17号	113.545	23.1568
357	广州鹏辉能源科技股份有限公司 （曾用名：广州市鹏辉电池有限公司）	2001-01-18	2023-10-30	C	38	电气机械和器材制造业	广东省	广州市	番禺区	广州市番禺区沙湾镇市良路（西村段）912号	113.39	22.9438
358	广州普金计算机科技股份有限公司 （曾用名：广州市普金计算机科技有限公司）	2000-11-21	2023-03-02	M	73	研究和试验发展	广东省	广州市	天河区	广州市天河区金穗路3号2801房自编A房	113.324	23.1306
359	广州市容川饲料有限公司	2003-02-18	2023-09-05	A	04	渔业	广东省	广州市	南沙区	广州市南沙区东涌镇西樵村西樵大桥西侧综合楼	113.396	22.8908
360	广州市锐丰音响科技股份有限公司 （曾用名：广州市锐丰建业灯光音响器材有限公司）	2001-04-23	2021-07-23	M	73	研究和试验发展	广东省	广州市	番禺区	广州市番禺区石楼镇市莲路石楼路段10号	113.491	22.9767
361	广东瑞联科技有限公司 （曾用名：广州市瑞联技术开发有限公司）	2001-02-19	2022-06-14	I	65	软件和信息技术服务业	广东省	广州市	天河区	广州市天河区五山路371号之一主楼2701-2705、2716单元（仅限办公用途）	113.353	23.1527
362	广州市三地信息技术有限公司	1998-05-04	2023-11-01	M	73	研究和试验发展	广东省	广州市	天河区	广州市天河区华夏路30号3407房（仅限办公）	113.328	23.1318
363	广州市三孚化工有限公司	1997-06-05	2014-08-11	C	26	化学原料和化学制品制造业	广东省	广州市	黄埔区	广州高新技术产业开发区科学大道111号主楼1202房	113.304	23.1477
364	广州市设计院	2004-10-13	-	M	74	专业技术服务业	广东省	广州市	黄埔区	广州市体育东路体育东横街3号	113.336	23.135
365	广州市晟龙电子科技有限公司	1999-05-26	2022-04-24	C	39	计算机、通信和其他电子设备制造业	广东省	广州市	荔湾区	广州市荔湾区东沙工业区荷景南路21号	113.254	23.0609
366	广州市食品工业研究所有限公司	1988-07-09	2021-11-17	C	14	食品制造业	广东省	广州市	黄埔区	广州高新技术产业开发区科学城尖塔山路11号	113.253	23.2851
367	广州市市政工程设计研究总院有限公司 （曾用名：广州市市政工程设计研究院）	1980-10-22	2023-07-11	E	48	土木工程建筑业	广东省	广州市	越秀区	广州市越秀区环市东路348号东座	113.29	23.1432
368	广州市天海花边有限公司	1990-09-25	2023-04-27	C	17	纺织业	广东省	广州市	天河区	广州市天河区黄埔大道中660号之一518房	113.357	23.1303
369	广州市天河弱电电子系统工程有限公司	1997-06-10	2020-09-29	E	49	建筑安装业	广东省	广州市	天河区	广州市天河区高普路1027号5层	113.419	23.1789
370	广州市通联技术发展有限公司	2001-03-21	2023-01-19	F	51	批发业	广东省	广州市	越秀区	广州市越秀区水荫路117号星光映景16层全层（01至10室）L3000号	113.318	23.149
371	广州市万宝冰箱有限公司	1999-03-26	2011-08-25	C	38	电气机械和器材制造业	广东省	广州市	海珠区	广州市海珠区江燕路268号万宝大厦十楼自编1007室	113.282	23.0827
372	广州市万世德智能装备科技有限公司 （曾用名：广州市万世德包装机械有限公司）	2003-05-15	2018-02-26	C	34	通用设备制造业	广东省	广州市	花都区	广州市花都区新华镇华兴工业区	113.242	23.3528
373	广州市微生物研究所	2013-12-13	-	M	73	研究和试验发展	广东省	广州市	黄埔区	广州市萝岗区尖塔山路1号	113.445	23.1745
374	广州市香雪制药股份有限公司	1986-04-30	2023-07-14	C	27	医药制造业	广东省	广州市	黄埔区	广州市黄埔区广州开发区科学城金峰园路2号（自编第一、二、三、四、五、六、七、八栋）	113.457	23.185
375	广州市新之地环保产业股份有限公司 （曾用名：广州市新之地环保产业有限公司）	1999-08-03	2023-10-30	N	77	生态保护和环境治理业	广东省	广州市	荔湾区	广州市荔湾区花地大道中83号16楼（部位：1601-1614室）	113.241	23.0995
376	广东信佰工程监理有限公司 （曾用名：广州市信佰信息技术咨询有限公司）	2002-12-31	2022-09-06	M	74	专业技术服务业	广东省	广州市	天河区	广州市天河区海安路13号之一2403室（仅限办公）	113.347	23.1306
377	广东轩辕网络科技股份有限公司 （曾用名：广州市轩辕网络科技有限公司）	1998-03-02	2023-02-13	I	65	软件和信息技术服务业	广东省	广州市	天河区	广州市天河区高普路1033号第8层	113.418	23.178
378	广州市捷妙贸易有限公司 （曾用名：广州市玄武资讯科技有限公司）	2000-06-22	2017-12-12	F	51	批发业	广东省	广州市	天河区	广州市天河区中山大道中130号4A35房	113.375	23.1361
379	宜通世纪科技股份有限公司 （曾用名：广州市宜通世纪科技有限公司）	2001-10-09	2022-09-29	E	49	建筑安装业	广东省	广州市	天河区	广州市天河区科韵路16号自编1栋1201	113.378	23.1314
380	广州市怡文环境科技股份有限公司 （曾用名：广州市怡文科技有限公司）	1995-10-10	2020-12-17	M	75	科技推广和应用服务业	广东省	广州市	黄埔区	广州市经济技术开发区南云三路12号（可作厂房使用）	113.454	23.1558
381	广州市易和信息技术有限公司 （曾用名：广州市易和网络技术有限公司）	2004-03-17	2020-12-16	M	73	研究和试验发展	广东省	广州市	天河区	广州市天河区天河路490号3517室（仅限办公）	113.342	23.1387
382	广州市易杰数码科技有限公司	2002-06-20	2023-04-25	I	63	电信、广播电视和卫星传输服务	广东省	广州市	天河区	广州市天河区中山大道路89号A栋10层南12-24房（不可作厂房使用）（该场所仅限办公用途）	113.369	23.1304
383	广州市永大光通信技术发展有限公司	2003-11-18	2021-05-31	M	73	研究和试验发展	广东省	广州市	番禺区	广州市番禺区番禺大道北555号番禺节能科技园天安科技创新大厦405-408单元	113.373	22.9848
384	广州市圆方计算机软件工程有限公司	1999-01-12	2017-06-27	I	65	软件和信息技术服务业	广东省	广州市	天河区	广州市天河区花城大道路85号3701房全层（仅作办公功能使用）	113.328	23.1261
385	广州市粤首实业有限公司	1998-09-25	2022-09-30	M	74	专业技术服务业	广东省	广州市	黄埔区	广州市黄埔区青年路190号	113.539	23.0702
386	广州市知微科技有限公司	2000-07-13	2021-03-12	I	65	软件和信息技术服务业	广东省	广州市	天河区	广州市天河区思成路23号宏太智慧谷七号楼2楼自编215房（仅限办公）	113.423	23.18
387	广州市志趣信息技术有限公司	2005-03-22	2022-01-29	M	73	研究和试验发展	广东省	广州市	海珠区	广州市海珠区海洲路38号404室（部位：自编B）（仅限办公）	113.349	23.1107
388	广州市智益信息技术有限公司	2001-06-07	2022-03-24	M	73	研究和试验发展	广东省	广州市	越秀区	广州市越秀区寺右新马路174号14楼自编D	113.319	23.1246
389	广州市中海达测绘仪器有限公司	1999-12-28	2023-10-31	I	65	软件和信息技术服务业	广东省	广州市	番禺区	广州市番禺区东环街番禺大道北555号天安总部中心13号楼202房	113.38	22.987
390	广州市中智软件开发有限公司	2001-09-17	2021-11-10	I	65	软件和信息技术服务业	广东省	广州市	天河区	广州市天河区天河北路906号1404房（仅限办公）	113.351	23.1464
391	广州市卓嘉计算机有限公司	2000-09-27	2021-09-29	M	73	研究和试验发展	广东省	广州市	天河区	广州市天河区中山大道西112、114号223房	113.361	23.1402
392	广州市尊网商通资讯科技有限公司	2000-08-22	2022-06-23	M	73	研究和试验发展	广东省	广州市	黄埔区	广州市黄埔区科学大道286号1001-9房（仅限办公）	113.465	23.174
393	广州视聆通网络科技有限公司	2003-10-24	2020-05-09	I	65	软件和信息技术服务业	广东省	广州市	黄埔区	广州市萝岗区科汇四街2号1206房	113.444	23.1725
394	广州数控设备有限公司	1991-04-08	2020-04-24	M	73	研究和试验发展	广东省	广州市	黄埔区	广州市萝岗区观达路22号	113.549	23.1597
395	广州数园网络有限公司	2000-04-25	2021-06-11	I	64	互联网和相关服务	广东省	广州市	天河区	广州市天河区五山路381号华南理工大学科技实业总厂（仅限办公用途）	113.352	23.1561
396	广州双桥股份有限公司	1999-08-28	2023-08-11	G	55	水上运输业	广东省	广州市	海珠区	广州市海珠区工业大道南箕路346号	113.279	23.0723
397	广州水泵厂有限公司 （曾用名：广州水泵厂）	1976-03-10	2020-05-08	C	34	通用设备制造业	广东省	广州市	越秀区	广州市越秀区东风东路733（1）号自编一楼13自编之四十三（仅限办公）	113.285	23.1126
398	广州太平洋电脑信息咨询有限公司	1997-11-07	2022-05-18	I	65	软件和信息技术服务业	广东省	广州市	天河区	广州市天河区高普路115号	113.421	23.1825
399	广州泰邦食品科技有限公司 （曾用名：广州泰邦食品添加剂有限公司）	2001-01-15	2014-05-21	M	73	研究和试验发展	广东省	广州市	黄埔区	广州市萝岗区永和经济开发区斗塘路18号	113.576	23.2116
400	广州天赐高新材料股份有限公司	2000-06-06	2023-05-31	C	26	化学原料和化学制品制造业	广东省	广州市	黄埔区	广州市黄埔区云埔工业区东诚片康达路8号	113.547	23.1305
401	广州天至环保科技有限公司	2004-07-19	2015-12-17	C	26	化学原料和化学制品制造业	广东省	广州市	海珠区	广州市海珠区广州大道南敦和路189号海珠科技产业基地敦和园区一号楼204、206号	113.326	23.0941
402	广州通易科技有限公司	2001-03-27	2023-02-02	M	73	研究和试验发展	广东省	广州市	天河区	广州市天河区翰景路1号1401房自编A、B、C、D1、H1部位	113.353	23.1498
403	广州图创计算机软件开发有限公司	2003-01-29	2023-06-13	I	65	软件和信息技术服务业	广东省	广州市	天河区	广州市天河区高新技术产业开发区首期工业园建工路9号2楼南区205、207、209号	113.379	23.1294
404	广州万孚生物技术股份有限公司 （曾用名：广州万孚生物技术有限公司）	1992-11-13	2023-03-09	M	73	研究和试验发展	广东省	广州市	黄埔区	广州市黄埔区科学城荔枝山路8号	113.445	23.185
405	广州网易互动娱乐有限公司	2002-10-15	2013-02-01	M	73	研究和试验发展	广东省	广州市	天河区	广州市天河区建中路59号801房	113.378	23.1297
406	广州微点焊设备有限公司	1996-07-11	2022-05-17	C	35	专用设备制造业	广东省	广州市	荔湾区	广州市荔湾区东沙荷景南路43号	113.252	23.0614
407	广州维德科技有限公司	1999-06-23	2021-11-30	M	73	研究和试验发展	广东省	广州市	天河区	广州市天河区东莞庄路161号自编13栋	113.344	23.163
408	广州卫富科技开发有限公司	1998-05-25	2021-03-17	M	73	研究和试验发展	广东省	广州市	从化区	广东从化经济开发区宝泰路12号（厂房）	113.515	23.4582
409	广州协商计算机有限公司	2006-06-02	2016-07-20	I	65	软件和信息技术服务业	广东省	广州市	天河区	广州市天河区龙口东路34号1401房自编1409单元	113.348	23.1432
410	广州协商科技有限公司	2001-07-27	2016-07-20	M	73	研究和试验发展	广东省	广州市	天河区	广州市天河区龙口东路34号1401房自编1409单元	113.348	23.1432
411	广州新岸数码科技有限公司	2005-01-10	2021-04-01	M	73	研究和试验发展	广东省	广州市	天河区	广州市天河区天河路208号粤海天河城大厦第39层02、03单元	113.33	23.1383
412	广州新晨信息系统工程有限公司	2000-10-24	2023-07-05	I	65	软件和信息技术服务业	广东省	广州市	天河区	广州市天河区元岗横路16号3栋2单元509、511单元	113.351	23.1779
413	广州新科佳都科技有限公司	2004-01-07	2023-08-08	M	75	科技推广和应用服务业	广东省	广州市	天河区	广州市天河区新岑四路2号佳都智慧大厦709房	113.412	23.1711
414	广州新莱福新材料股份有限公司 （曾用名：广州新莱福磁电有限公司）	1998-05-08	2023-09-22	C	26	化学原料和化学制品制造业	广东省	广州市	黄埔区	广州经济技术开发区永和经济区沧海四路4号	113.569	23.1839
415	广州新龙浩工业设备有限公司	2003-06-11	2023-01-13	C	34	通用设备制造业	广东省	广州市	番禺区	广州市番禺区新造镇智港大街15号1201室	113.424	23.0419
416	广东利通科技投资有限公司 （曾用名：广州新软计算机技术有限公司）	2000-11-28	2023-01-17	M	73	研究和试验发展	广东省	广州市	黄埔区	广州市萝岗区科学城科汇三街5号601房（仅限办公用途）	113.442	23.1745
417	广州鑫源恒业电力线路器材股份有限公司 （曾用名：广州鑫源恒业电力线路器材有限公司）	2001-09-18	2023-02-06	C	38	电气机械和器材制造业	广东省	广州市	增城区	广州市增城新塘镇永和陂头村石虎山（土名）	113.619	23.1841
418	广州兴华玻璃工业有限公司	1994-10-24	2022-08-10	C	30	非金属矿物制品业	广东省	广州市	白云区	广州市白云区槎头广海路后岗西街6号自编1栋首层	113.23	23.1928
419	广州白云山星群（药业）股份有限公司 （曾用名：广州星群（药业）股份有限公司）	1993-06-18	2023-04-04	M	73	研究和试验发展	广东省	广州市	海珠区	广州市海珠区南洲路162号	113.304	23.0694
420	阳普医疗科技股份有限公司 （曾用名：广州阳普医疗科技股份有限公司）	2000-04-05	2023-06-09	M	73	研究和试验发展	广东省	广州市	黄埔区	广州市黄埔区科学城开源大道102号620房	113.523	23.166
421	广州毅昌科技股份有限公司	1997-09-12	2023-07-17	C	38	电气机械和器材制造业	广东省	广州市	黄埔区	广州市高新技术产业开发区科学城科丰路29号	113.462	23.1523
422	广州市殷雷信息技术有限公司	2002-06-17	2021-08-31	I	65	软件和信息技术服务业	广东省	广州市	天河区	广州市天河区王园路15号（部位：228）	113.415	23.1287
423	广州盈皓照明科技有限公司 （曾用名：广州盈皓照明贸易有限公司）	2001-11-02	2021-06-29	F	51	批发业	广东省	广州市	荔湾区	广州市荔湾区鹤盛路198号C幢三层东侧	113.253	23.0792
424	广州优利康沛科技有限公司	1999-06-04	2017-07-21	C	35	专用设备制造业	广东省	广州市	天河区	广州市天河区大灵山路61号第26栋C1305房	113.426	23.1399
425	广州优唛装饰科技有限公司	2000-03-09	2012-05-04	C	21	家具制造业	广东省	广州市	天河区	广州市天河区黄埔大道东８号天成居１－３层	113.397	23.1213
426	广州宇阳电力科技有限公司	2001-08-30	2023-05-09	M	73	研究和试验发展	广东省	广州市	越秀区	广州市越秀区环市东路500号1808房（不可作厂房使用）	113.315	23.1407
427	广州御新软件有限公司	2006-01-12	2017-03-30	M	73	研究和试验发展	广东省	广州市	天河区	广州市天河区高唐路234号902房（仅限办公用途）	113.41	23.1713
428	广州中远海运船舶电子科技有限公司 （曾用名：广州远洋通信导航有限公司）	1993-08-10	2022-12-28	M	73	研究和试验发展	广东省	广州市	天河区	广州市天河区天河北路423-427号724（仅限办公用途）	113.337	23.1488
429	广州粤建三和软件股份有限公司 （曾用名：广州粤建三和软件有限公司）	1999-05-21	2023-04-03	N	76	水利管理业	广东省	广州市	天河区	广州市天河区五山路246、248、250号301-1房	113.353	23.1495
430	广州粤能电力科技开发有限公司	1993-02-22	2023-05-11	M	73	研究和试验发展	广东省	广州市	越秀区	广州市越秀区先烈中路83号凯城华庭五楼502室（不可作厂房使用）	113.306	23.1481
431	广州粤腾通信科技有限公司	2003-12-02	2019-01-31	M	73	研究和试验发展	广东省	广州市	天河区	广州市天河区五山路244号301房（仅限办公用途，不可作厂房使用）	113.353	23.1493
432	广州真意通信息技术有限公司	2004-09-12	2021-04-22	M	73	研究和试验发展	广东省	广州市	天河区	广州市天河区天源路1202号H栋18号440房	113.376	23.1987
433	广州智光电气技术有限公司 （曾用名：广州智光电机有限公司）	2002-02-05	2023-07-12	M	73	研究和试验发展	广东省	广州市	黄埔区	广州市黄埔区埔南路51号自编1栋、自编2栋、自编3栋、自编4栋、自编5栋	113.553	23.1353
434	广州智特奇生物科技股份有限公司 （曾用名：广州智特奇生物科技有限公司）	1998-10-12	2023-01-05	M	73	研究和试验发展	广东省	广州市	黄埔区	广州市黄埔区中新广州知识城凤凰三横路78号	113.507	23.398
435	广州中长康达信息技术有限公司	1998-12-03	2017-06-07	I	65	软件和信息技术服务业	广东省	广州市	天河区	广州市天河区思成路19号601房（仅限办公用途）	113.424	23.1798
436	广州中大电讯科技有限公司	2001-05-29	2021-12-06	I	65	软件和信息技术服务业	广东省	广州市	番禺区	广州市番禺区小谷围街中二横路22号A204-1	113.401	23.067
437	广州中软信息技术有限公司	1996-11-27	2023-08-25	I	65	软件和信息技术服务业	广东省	广州市	天河区	广州市天河区科韵路16号广州信息港C2栋8层	113.379	23.1313
438	广州白云山中一药业有限公司 （曾用名：广州中一药业有限公司）	1959-09-24	2023-06-09	M	73	研究和试验发展	广东省	广州市	黄埔区	广州市黄埔区云埔一路32号	113.55	23.1516
439	广州珠江电信设备制造有限公司	1996-03-12	2019-02-26	M	73	研究和试验发展	广东省	广州市	白云区	广州市白云区太和镇大沥村广州民营科技园管理中心壹号	113.341	23.3015
440	广州珠江钢琴集团股份有限公司 （曾用名：广州珠江钢琴集团有限公司）	1987-10-10	2023-05-19	C	24	文教、工美、体育和娱乐用品制造业	广东省	广州市	增城区	广州市增城区永宁街香山大道38号1号楼、厂房（自编号3号楼）	113.63	23.1797
441	广州珠江钢铁有限责任公司	1993-05-25	2021-12-09	C	31	黑色金属冶炼和压延加工业	广东省	广州市	黄埔区	广州经济技术开发区西基路9号	113.514	23.0685
442	安捷利（番禺）电子实业有限公司	1994-04-08	2020-12-10	C	39	计算机、通信和其他电子设备制造业	广东省	广州市	南沙区	广州市南沙区望江二街4号1201（A2)房	113.536	22.8082
443	广州安凯微电子股份有限公司 （曾用名：安凯（广州）软件技术有限公司）	2001-04-10	2023-10-30	I	65	软件和信息技术服务业	广东省	广州市	黄埔区	广州市黄埔区博文路107号	113.487	23.1875
444	广州珐玛珈智能设备股份有限公司 （曾用名：珐玛珈（广州）包装设备有限公司）	2002-10-15	2023-01-16	C	34	通用设备制造业	广东省	广州市	黄埔区	广州经济技术开发区永和经济区黄旗山路16号	113.548	23.2119
445	番禺得意精密电子工业有限公司	1993-01-28	2021-01-13	C	39	计算机、通信和其他电子设备制造业	广东省	广州市	南沙区	广州南沙经济技术开发区板头管理区金岭路通用２号厂房	113.555	22.795
446	番禺珠江钢管有限公司	1993-06-07	2022-05-09	C	31	黑色金属冶炼和压延加工业	广东省	广州市	番禺区	广州市番禺区石基镇清河路	113.392	22.9409
447	高威电信（广州）有限公司	2002-08-22	2023-02-28	M	73	研究和试验发展	广东省	广州市	越秀区	广州市越秀区中山四路395号南侧3楼自编309室（仅限办公）	113.276	23.1312
448	国光电器股份有限公司	1995-12-08	2023-02-06	C	39	计算机、通信和其他电子设备制造业	广东省	广州市	花都区	广州市花都区新雅街镜湖大道8号	113.256	23.3798
449	金发科技股份有限公司	1993-05-26	2023-05-30	C	29	橡胶和塑料制品业	广东省	广州市	黄埔区	广州市高新技术产业开发区科学城科丰路33号	113.466	23.1572
450	金鹏电子信息机器有限公司	1995-09-13	2021-05-24	I	65	软件和信息技术服务业	广东省	广州市	黄埔区	广州市高新技术产业开发区神舟路9号	113.438	23.1753
451	京信通信技术（广州）有限公司	2002-05-23	2023-10-07	I	63	电信、广播电视和卫星传输服务	广东省	广州市	黄埔区	广州经济技术开发区金碧路6号	113.526	23.057
452	中信环境技术（广州）有限公司 （曾用名：诺卫环境安全工程技术（广州）有限公司）	2003-09-25	2023-07-28	N	77	生态保护和环境治理业	广东省	广州市	南沙区	广州市南沙区小虎南二路26号自编二栋101（仅限办公用途）	113.549	22.8408
453	日立电梯（中国）有限公司	1995-10-04	2023-06-06	C	34	通用设备制造业	广东省	广州市	天河区	广州市天河区天河北路233号中信广场办公大楼62层（仅限办公）（不可作厂房）	113.329	23.1445
454	斯凯文软件技术（广东）有限公司	1994-03-01	2022-01-12	I	65	软件和信息技术服务业	广东省	广州市	天河区	广州市天河区马场路16号之一1110室，1111室（仅限办公）	113.35	23.1238
455	松下．万宝（广州）压缩机有限公司 （曾用名：松下·万宝（广州）压缩机有限公司）	1993-06-10	2023-10-24	C	34	通用设备制造业	广东省	广州市	番禺区	广州市番禺区钟村万宝基地万宝北街36号	113.31	23.0006
456	速达软件技术（广州）有限公司	1999-03-01	2022-03-07	I	65	软件和信息技术服务业	广东省	广州市	黄埔区	广州市黄埔区蓝玉四街9号5号厂房东601房	113.533	23.0642
457	天讯瑞达通信技术有限公司	1997-03-05	2022-07-05	I	65	软件和信息技术服务业	广东省	广州市	天河区	广州市天河区华利路19号三楼	113.323	23.1239
458	托肯恒山科技（广州）有限公司	1998-10-26	2023-04-04	C	39	计算机、通信和其他电子设备制造业	广东省	广州市	黄埔区	广州高新技术产业开发区广州科学城南翔一路66号	113.462	23.1626
459	万宝冷机集团广州电器有限公司	1974-04-01	2023-09-28	O	81	机动车、电子产品和日用产品修理业	广东省	广州市	花都区	广州市花都区花山镇两龙圩	113.272	23.4567
460	广州易宝信息技术有限公司 （曾用名：易宝电脑系统（广州）有限公司）	2000-09-15	2020-11-04	C	39	计算机、通信和其他电子设备制造业	广东省	广州市	天河区	广州市天河区新岑四路2号五层501-502单元（仅限办公用途）	113.412	23.1711
461	志圣科技（广州）有限公司	1994-04-09	2022-07-05	C	39	计算机、通信和其他电子设备制造业	广东省	广州市	花都区	广州市花都区狮岭镇第二工业区利和路６号	113.152	23.468
462	中科院广州化灌工程有限公司	1993-08-19	2022-08-18	E	48	土木工程建筑业	广东省	广州市	天河区	广州市天河区兴科路368号实验楼壹楼133-136房	113.368	23.1796
463	中科院广州化学有限公司	2001-12-21	2023-09-07	C	26	化学原料和化学制品制造业	广东省	广州市	天河区	广州市天河区兴科路368号（仅限办公）（不可作厂房使用）	113.368	23.1796
464	中交四航工程研究院有限公司	1988-07-04	2022-06-13	E	48	土木工程建筑业	广东省	广州市	白云区	广州市白云区北太路1633号广州民营科技园科盛路8号配套服务大楼5层A505-398房	113.342	23.302
465	广州中山眼科验光配镜有限责任公司 （曾用名：中山大学附属眼科医院验光配镜中心）	1985-12-01	2022-08-31	O	82	其他服务业	广东省	广州市	越秀区	广州市越秀区先烈南路54号	113.3	23.1401
466	中水珠江规划勘测设计有限公司	1994-12-26	2023-02-10	M	74	专业技术服务业	广东省	广州市	天河区	广州市天河区天寿路105号9-19层	113.339	23.1538
467	中铁大桥局集团第三工程有限公司	1989-07-06	2023-03-03	E	48	土木工程建筑业	广东省	广州市	花都区	广州市花都区建设路34号	113.214	23.3863
468	广东省电力设计研究院	1993-07-28	2000-05-10	D	44	电力、热力生产和供应业	广东省	广州市	越秀区	广州市东风东路８４６号	113.315	23.1377
469	广东昂扬技术开发有限公司	1996-07-18	2019-10-23	M	73	研究和试验发展	广东省	广州市	黄埔区	广州市黄埔区开源大道188号自编七栋302房	113.518	23.1611
470	广东百迅信息科技有限公司	2004-03-15	2023-08-30	I	65	软件和信息技术服务业	广东省	广州市	南沙区	广州市南沙区南沙街进港大道577号2902房	113.588	22.8042
471	广东宝桑园健康食品研究发展中心	2003-06-05	2023-07-18	M	73	研究和试验发展	广东省	广州市	天河区	广州市天河区东莞庄一横路133号	113.346	23.1576
472	广东东方思维科技有限公司	2000-08-14	2023-10-30	I	65	软件和信息技术服务业	广东省	广州市	越秀区	广州市越秀区白云路83、85号17层	113.29	23.1255
473	广东东硕科技有限公司	2002-10-28	2022-03-21	M	75	科技推广和应用服务业	广东省	广州市	白云区	广州市白云区北太路1633号广州民营科技园科兴路2号绿地汇创广场1栋26层2621房	113.336	23.3081
474	广东百克电子有限公司 （曾用名：广东东松三雄电器有限公司）	2002-01-16	2021-11-09	F	51	批发业	广东省	广州市	番禺区	广州市番禺区石壁街屏山二村屏都路11号305	113.302	22.9675
475	广东飞达交通工程有限公司	1993-12-10	2021-10-14	I	65	软件和信息技术服务业	广东省	广州市	黄埔区	广东省广州市黄埔区科学大道50号A3栋20层	113.438	23.1708
476	广东高新兴通信股份有限公司	2011-11-09	2017-04-26	M	73	研究和试验发展	广东省	广州市	黄埔区	广州高新技术产业开发区科学城开创大道2819号A706房	113.442	23.166
477	广东公诚通信建设监理有限公司	2000-03-01	2023-07-24	M	74	专业技术服务业	广东省	广州市	天河区	广州市天河区中山大道西89号A栋9层908-911房（仅限办公）	113.363	23.1409
478	广东光泰激光科技有限公司	2003-09-11	2023-05-23	C	39	计算机、通信和其他电子设备制造业	广东省	广州市	黄埔区	广东省广州市黄埔区广州开发区南翔一路62号自编六栋一楼东南部101房	113.46	23.1626
479	广东和新科技有限公司	2000-07-28	2022-09-26	C	39	计算机、通信和其他电子设备制造业	广东省	广州市	天河区	广州市天河区华观路1933号1004房、1005房、1006房	113.409	23.1752
480	广东华际友天信息科技有限公司	2002-04-15	2023-04-21	I	65	软件和信息技术服务业	广东省	广州市	天河区	广州市天河区高普路136号第四层411、412房（仅限办公）	113.417	23.178
481	广东华悦世泽科技有限公司 （曾用名：广东九城科技有限公司）	2005-09-26	2019-09-01	I	65	软件和信息技术服务业	广东省	广州市	天河区	广东省广州市天河区汇彩路38号之一401房	113.424	23.1186
482	蓝鸽集团有限公司 （曾用名：广东蓝鸽科技有限公司）	2003-07-10	2017-03-13	I	65	软件和信息技术服务业	广东省	广州市	白云区	广州市白云区广州民营科技园B-02号	113.305	23.3017
483	广东南方数码科技股份有限公司 （曾用名：广东南方数码科技有限公司）	2003-01-03	2023-09-28	M	74	专业技术服务业	广东省	广州市	天河区	广州市天河区科韵路24、26号四楼	113.381	23.1295
484	广东南方通信建设有限公司	1993-10-09	2023-02-20	I	65	软件和信息技术服务业	广东省	广州市	天河区	广州市天河区中山大道华景路1号南方通信大厦24—25楼	113.364	23.1409
485	广东南方通信全球通智能卡系统有限公司	2004-11-22	2015-11-19	C	39	计算机、通信和其他电子设备制造业	广东省	广州市	白云区	广州市白云区江高镇鹤云路3号	113.219	23.2732
486	广东南方信息安全产业基地有限公司	2004-03-19	2022-08-24	I	65	软件和信息技术服务业	广东省	广州市	黄埔区	广州市黄埔区彩频路9号1201-1房	113.443	23.1684
487	广东启明科技发展有限公司	2004-01-02	2023-02-03	I	65	软件和信息技术服务业	广东省	广州市	黄埔区	广州市黄埔区科学城天丰路3号401房	113.468	23.1661
488	广东青鸟信息系统有限公司	2005-04-12	2019-09-01	I	65	软件和信息技术服务业	广东省	广州市	越秀区	广东省广州市越秀区农林下路81号之一28B房	113.304	23.1367
489	广东省电子技术研究所	1993-01-06	2018-08-20	M	73	研究和试验发展	广东省	广州市	天河区	广州市天河区中山大道西６１－６５号	113.355	23.142
490	广东省公路勘察规划设计院有限公司	1993-09-28	2022-01-07	M	74	专业技术服务业	广东省	广州市	白云区	广东省广州市白云区黄边北路146号	113.29	23.2292
491	广东省农科集团良种苗木中心	1999-06-18	2017-09-22	A	02	林业	广东省	广州市	天河区	广州市天河区金颖路金颖西二街16，18号省农科院旱粮实验室二层	113.364	23.1547
492	广东省水利电力勘测设计研究院有限公司 （曾用名：广东省水利电力勘测设计研究院）	1995-11-07	2020-10-22	N	76	水利管理业	广东省	广州市	荔湾区	广州市荔湾区荔湾路陈家祠道４８号	113.251	23.1329
493	和包网络科技（广东）有限公司 （曾用名：广东时代网络电子有限公司）	2003-01-16	2023-07-06	I	64	互联网和相关服务	广东省	广州市	天河区	广东省广州市天河区体育西路111-115单号8楼C2	113.327	23.1419
494	广东数据通信网络有限公司	2000-09-06	2003-07-25	I	65	软件和信息技术服务业	广东省	广州市	越秀区	广州市东山区中山一路49号金羊一街6号三楼	113.316	23.1343
495	广东拓思软件科学园有限公司	2002-06-27	2021-11-10	I	65	软件和信息技术服务业	广东省	广州市	黄埔区	广州市萝岗区广州经济技术开发区科学城彩频路11号	113.443	23.1679
496	广东微奥科技有限公司	1998-07-01	2019-09-01	I	65	软件和信息技术服务业	广东省	广州市	天河区	广州市天河区科新路旧猪场一社工业区3号311房	113.388	23.1257
497	广东先朗照明有限公司	1995-11-13	2022-07-20	C	38	电气机械和器材制造业	广东省	广州市	白云区	广东省广州市白云区江高镇鹤云路11号	113.221	23.2731
498	广东新南都饲料科技有限公司	2006-02-21	2023-11-06	C	13	农副食品加工业	广东省	广州市	天河区	广州市天河区五山镇大丰一街1号广东省农业科学院畜牧研究所A区1号	113.372	23.1617
499	广东新粤交通投资有限公司	1998-05-29	2023-10-31	M	73	研究和试验发展	广东省	广州市	白云区	广州市白云区机场路1731、1733、1735号二楼	113.269	23.2058
500	广东新支点技术服务有限公司	2004-02-27	2023-06-02	I	65	软件和信息技术服务业	广东省	广州市	黄埔区	广州市黄埔区伴河路190号自编A栋10层1001	113.515	23.1657
501	广东怡创通信有限公司	2004-07-15	2006-05-22	M	73	研究和试验发展	广东省	广州市	天河区	广州市天河区建工路12号第三层04号	113.378	23.1288
502	广东亿迅科技有限公司	2001-11-20	2023-08-24	M	74	专业技术服务业	广东省	广州市	天河区	广州市天河区花城大道777号	113.358	23.1238
503	广东盈嘉科技工程发展有限公司	2000-03-28	2023-10-30	E	48	土木工程建筑业	广东省	广州市	越秀区	广东省广州市越秀区水荫路2号西座507自编A01-1	113.316	23.141
504	广东智威畜牧水产有限公司	2003-07-10	2020-02-27	M	73	研究和试验发展	广东省	广州市	天河区	广州市天河区五山广东省农科院畜牧研究所自编1号	113.372	23.1617
505	广东中大讯通信息有限公司	2005-01-24	2021-07-12	M	73	研究和试验发展	广东省	广州市	番禺区	广州市番禺区小谷围街青蓝街22号A204	113.392	23.0624
506	广东中科药物研究有限公司	2005-12-20	2020-08-24	M	73	研究和试验发展	广东省	广州市	黄埔区	广州市萝岗区高新技术产业开发区科学城掬泉路3号A区1105房	113.455	23.1687
507	广州爱联科技有限公司	1994-04-28	2021-12-16	I	65	软件和信息技术服务业	广东省	广州市	天河区	广州市天河区黄埔大道西路118号1401-1405房（仅限办公功能）（不可作厂房使用）	113.369	23.1304
508	广州安必平医药科技股份有限公司 （曾用名：广州安必平医药科技有限公司）	2005-07-06	2023-09-19	M	73	研究和试验发展	广东省	广州市	黄埔区	广州市黄埔区科信街2号	113.43	23.1779
509	广州八通电子实业有限公司	1993-08-25	2021-09-24	C	40	仪器仪表制造业	广东省	广州市	番禺区	广州市番禺区大龙茶东村东兴路1号四座101	113.422	22.9661
510	广州白云蓝天电子科技有限公司	1998-08-30	2020-03-31	M	73	研究和试验发展	广东省	广州市	黄埔区	广州市高新技术产业开发区科学城神舟路885号生产中心二D栋	113.452	23.1906
511	广州百花香料股份有限公司	1993-10-12	2021-04-15	C	26	化学原料和化学制品制造业	广东省	广州市	荔湾区	广州市荔湾区东漖北路560号（南楼）911室	113.235	23.0955
512	广州宝力特液压技术有限公司 （曾用名：广州宝力特液压密封有限公司）	2000-01-24	2023-07-19	C	34	通用设备制造业	广东省	广州市	黄埔区	广州市经济技术开发区永和经济区田园路97号	113.563	23.1932
513	广州保赐利化工有限公司	2000-08-30	2022-05-10	C	26	化学原料和化学制品制造业	广东省	广州市	从化区	广东从化经济开发区太源路11号	113.502	23.4491
514	广州贝龙环保产业科技股份有限公司 （曾用名：广州贝龙环保热力设备股份有限公司）	1995-10-24	2023-09-27	M	73	研究和试验发展	广东省	广州市	黄埔区	广州市经济技术开发区禾丰路63号	113.574	23.2161
515	广州博济新药临床研究中心有限公司 （曾用名：广州博济新药临床研究中心）	2003-10-10	2019-06-10	M	73	研究和试验发展	广东省	广州市	增城区	广州市增城区永宁街创立路3号（增城经济技术开发区核心区内）	113.628	23.1837
516	博济医药科技股份有限公司 （曾用名：广州博济医药生物技术有限公司）	2002-09-29	2023-06-06	M	73	研究和试验发展	广东省	广州市	黄埔区	广州黄埔区科学城南翔一路62号（二、三、四、五）栋	113.46	23.1626
517	广州白云山陈李济药厂有限公司 （曾用名：广州陈李济药厂）	1959-09-24	2022-10-20	C	27	医药制造业	广东省	广州市	海珠区	广州市海珠区广州大道南１６８８号	113.332	23.2055
518	呈和科技股份有限公司 （曾用名：广州呈和科技有限公司）	2002-01-31	2023-10-09	C	26	化学原料和化学制品制造业	广东省	广州市	白云区	广州市白云区北太路1633号广州民营科技园科强路2号	113.341	23.3015
519	广州诚毅科技开发有限公司	2000-03-06	2022-08-11	C	39	计算机、通信和其他电子设备制造业	广东省	广州市	越秀区	广州市越秀区寺右新马路174号14楼自编B房（仅限办公用途）	113.319	23.1246
520	广州创想云科技有限公司 （曾用名：广州创想科技股份有限公司）	1997-05-20	2023-03-06	M	73	研究和试验发展	广东省	广州市	天河区	广州市天河区中山大道西89号4层421房	113.363	23.1409
521	广州达安临床检验中心有限公司	2006-02-28	2022-11-11	M	73	研究和试验发展	广东省	广州市	黄埔区	广州市高新技术产业开发区荔枝山路6号	113.444	23.1852
522	广州达意隆包装机械股份有限公司	1998-12-18	2023-06-12	C	35	专用设备制造业	广东省	广州市	黄埔区	广州市黄埔区云埔一路23号	113.55	23.1516
523	广州大凌实业有限公司	1992-09-22	2023-05-05	C	39	计算机、通信和其他电子设备制造业	广东省	广州市	黄埔区	广州市黄埔区黄陂龙朱路1号之一1栋315房	113.441	23.1969
524	广州德旺灯具制造有限公司 （曾用名：广州德旺塑料制品有限公司）	2005-12-14	2017-08-22	C	38	电气机械和器材制造业	广东省	广州市	从化区	广州市从化明珠工业园工业南路12号	113.308	23.0116
525	广州迪森热能技术股份有限公司	1996-07-16	2023-09-04	D	44	电力、热力生产和供应业	广东省	广州市	黄埔区	广州市经济技术开发区东区东众路42号	113.511	23.1454
526	广州电器科学研究院	1992-02-13	2023-03-17	M	73	研究和试验发展	广东省	广州市	海珠区	广州市海珠区新港西路204号	113.316	23.1011
527	广州鼎坚资讯科技有限公司	2003-08-26	2023-08-15	I	65	软件和信息技术服务业	广东省	广州市	天河区	广州市天河区东圃车陂路黄洲工业区内自编8号1楼东	113.395	23.127
528	广州番禺巨大汽车音响设备有限公司	1999-02-04	2020-06-02	C	39	计算机、通信和其他电子设备制造业	广东省	广州市	番禺区	广州市番禺区大石街石北工业路684号11栋328号	113.292	23.0203
529	广州奥特信息科技股份有限公司 （曾用名：广州复旦奥特科技股份有限公司）	1993-02-17	2022-08-10	I	65	软件和信息技术服务业	广东省	广州市	黄埔区	广州市黄埔区科学大道52号201,202,203,204	113.437	23.1705

## Sheet: 2009-2011
Number	Company Name	Date of Establishment	Date of Approval	Industry Code (Category)	Industry Code (Major Category)	Industry Sector	Province	City	District	Address	Longitude	Latitude
1	光宝智能汽车（广州）有限公司 （曾用名：建兴光电科技（广州）有限公司）	2000-08-28	2021-04-16	C	39	计算机、通信和其他电子设备制造业	广东省	广州市	黄埔区	广州高新技术产业开发区科学城光宝路8号	113.426	23.168
2	骏升科技（中国）有限公司	1992-08-15	2022-03-24	C	39	计算机、通信和其他电子设备制造业	广东省	广州市	番禺区	广州市番禺区钟村镇市广路钟二路段45号	113.358	22.9681
3	松下万宝（广州）电熨斗有限公司	1992-12-08	2023-05-31	C	38	电气机械和器材制造业	广东省	广州市	番禺区	广州市番禺区钟村街万宝基地万宝北街33号	113.312	22.9996
4	光宝电子（广州）有限公司 （曾用名：旭丽电子（广州）有限公司）	2000-09-01	2010-02-08	C	39	计算机、通信和其他电子设备制造业	广东省	广州市	黄埔区	广州高新技术产业开发区科学城	113.442	23.166
5	依利安达（广州）电子有限公司	1993-12-30	2023-01-09	C	39	计算机、通信和其他电子设备制造业	广东省	广州市	黄埔区	广州经济技术开发区临江路3号	113.534	23.0737
6	中国轻工业广州工程有限公司 （曾用名：中国轻工业广州设计工程有限公司）	2003-01-02	2023-10-11	E	48	土木工程建筑业	广东省	广州市	番禺区	广州市番禺区石楼镇创启路63号创新科技园A9号楼	113.466	22.9833
7	中交第四航务工程勘察设计院有限公司	1993-08-25	2023-08-14	E	50	建筑装饰、装修和其他建筑业	广东省	广州市	海珠区	广州市海珠区前进路161号	113.288	23.1062
8	SEW-传动设备 （广州）有限公司	2003-01-09	2023-09-27	C	38	电气机械和器材制造业	广东省	广州市	黄埔区	广州经济技术开发区东区骏达路9号	113.534	23.1458
9	安迅（广州）科技有限公司	1998-08-12	2023-07-05	C	39	计算机、通信和其他电子设备制造业	广东省	广州市	越秀区	广州市越秀区中山三路33号A塔1410房A塔1411室A塔1401室A塔1402房A塔1403室A塔1408室A塔1409房自编1446房号（不可作厂房使用）	113.289	23.1317
10	澳华达香精（广州）有限公司 （曾用名：澳华达香料科技（广州）有限公司）	2007-11-30	2022-08-23	C	26	化学原料和化学制品制造业	广东省	广州市	黄埔区	广州市萝岗区云埔工业区云埔一路22号	113.547	23.1514
11	贝格工业涂料（广州）有限公司	2003-12-30	2023-08-21	M	73	研究和试验发展	广东省	广州市	黄埔区	广州经济技术开发区永和经济区新庄五路1号	113.565	23.1933
12	长兴（广州）电子材料有限公司	2001-03-26	2022-08-11	C	39	计算机、通信和其他电子设备制造业	广东省	广州市	黄埔区	广州经济技术开发区东区东鹏大道69号	113.531	23.1339
13	电讯盈科信息技术（广州）有限公司	2001-05-28	2023-09-27	I	65	软件和信息技术服务业	广东省	广州市	黄埔区	广州经济技术开发区志诚大道融汇大厦14楼1408、1409室	113.532	23.067
14	广东贝加科技发展有限公司	2004-07-21	2019-06-24	M	75	科技推广和应用服务业	广东省	广州市	荔湾区	广州市荔湾区龙溪中路48号1611房（仅限办公）	113.215	23.0809
15	广东倍思控制技术有限公司	2002-01-18	2022-10-27	M	73	研究和试验发展	广东省	广州市	越秀区	广州市越秀区先烈中路81号之三16-17层（部位：自编17DEF）	113.304	23.1469
16	广东创明遮阳科技有限公司	2006-05-15	2023-04-07	M	73	研究和试验发展	广东省	广州市	黄埔区	广州市萝岗区科学城科学大道科汇发展中心科汇二街4号401室（仅限办公）	113.442	23.1732
17	广东道路信息发展有限公司	2005-10-25	2022-03-07	C	39	计算机、通信和其他电子设备制造业	广东省	广州市	越秀区	广东省广州市越秀区寺右新马路21号2114房	113.315	23.126
18	广东德士嘉通讯系统有限公司	2005-06-10	2021-03-19	I	65	软件和信息技术服务业	广东省	广州市	番禺区	广州市番禺区东环街迎宾路730号广州市番禺节能科技园内天安科技创新大厦516房	113.373	22.9848
19	广东地球村计算机系统有限公司	1999-10-20	2022-05-26	I	65	软件和信息技术服务业	广东省	广州市	天河区	广州市天河区高新技术产业开发区首期工业园建中路62号第二层203室	113.378	23.1291
20	广东电研锅炉压力容器检验中心有限公司	2003-05-20	2022-05-24	M	74	专业技术服务业	广东省	广州市	越秀区	广东省广州市越秀区先烈中路83号502自编之三房	113.306	23.1479
21	广东飞讯信息技术有限公司	2003-09-25	2022-01-19	I	65	软件和信息技术服务业	广东省	广州市	越秀区	广州市越秀区北京路3号20层（一址多照）	113.277	23.1218
22	广东国笔科技股份有限公司	1998-06-19	2018-05-02	M	73	研究和试验发展	广东省	广州市	番禺区	广州市番禺区小谷围街外环西路100号广东工业大学理学馆422房	113.406	23.0413
23	广东哈工科技发展有限公司 （曾用名：广东哈工大首创科技发展有限公司）	2002-12-30	2022-03-29	M	73	研究和试验发展	广东省	广州市	天河区	广州市天河区珠江新城临江大道西33号碧海湾B座506	113.326	23.1204
24	广东好普多肽生物科技有限公司	2007-11-13	2019-06-21	M	73	研究和试验发展	广东省	广州市	黄埔区	广州高新技术产业开发区观虹路12号1007房	113.464	23.1739
25	广东好太太科技发展有限公司	2005-01-05	2008-01-04	C	39	计算机、通信和其他电子设备制造业	广东省	广州市	天河区	广州市天河区东圃镇黄村十社福园中路4号	113.42	23.1325
26	恒峰信息技术有限公司 （曾用名：广东恒峰信息技术有限公司）	2003-01-14	2023-01-17	M	73	研究和试验发展	广东省	广州市	黄埔区	广州市黄埔区中新广州知识城亿创街1号406房之133	113.555	23.3308
27	广东宏大民爆集团有限公司 （曾用名：广东宏大增化民爆有限责任公司）	2007-12-11	2023-02-17	C	26	化学原料和化学制品制造业	广东省	广州市	增城区	广州市增城增江街联益村光大路28号	113.873	23.3304
28	广东华南理工大学造纸工程研究中心有限公司 （曾用名：广东华南理工大学造纸与污染控制国家工程研究中心）	1996-10-24	2022-07-20	C	35	专用设备制造业	广东省	广州市	天河区	广州市天河区五山华南理工大学造纸工程楼２０１、３０５房	113.353	23.1563
29	广东慧通信息技术有限公司	2004-10-22	2023-04-11	I	64	互联网和相关服务	广东省	广州市	越秀区	广州市越秀区下塘西路37号803室	113.28	23.1505
30	广东精创机械制造有限公司	2006-11-16	2022-02-18	C	34	通用设备制造业	广东省	广州市	番禺区	广州市番禺区石楼镇砺江路11号	113.495	22.9823
31	广东蓝通科技发展有限公司	2002-02-27	2020-12-01	M	73	研究和试验发展	广东省	广州市	番禺区	广州市番禺区大石街振华路7号501房	113.543	23.6026
32	广东力特工程机械有限公司	1994-12-17	2022-09-14	E	49	建筑安装业	广东省	广州市	黄埔区	广州市黄埔区红荔路4号	113.504	23.0928
33	广东履安实业有限公司	2001-04-30	2022-06-14	C	35	专用设备制造业	广东省	广州市	天河区	广州市天河区金颖路1号一楼（不可作厂房使用）（仅限办公）	113.354	23.152
34	广东前线科技有限公司	2004-12-28	2023-02-16	M	75	科技推广和应用服务业	广东省	广州市	越秀区	广州市越秀区中山一路57号13楼1303A房	113.315	23.1336
35	广东瑞普科技股份有限公司 （曾用名：广东瑞普信息科技有限公司）	2004-08-30	2023-06-19	I	65	软件和信息技术服务业	广东省	广州市	天河区	广州市天河区天河路228号之一810房	113.332	23.1378
36	广东帅广医药有限公司	2005-01-25	2021-05-31	C	27	医药制造业	广东省	广州市	天河区	广东省广州市天河区珠江新城海安路13号财富世纪广场A1栋2203室	113.347	23.1305
37	广东旺大生物科技有限公司	2011-01-28	2022-10-20	C	13	农副食品加工业	广东省	广州市	黄埔区	广州市黄埔区新龙镇大坦翠湖街2号	113.359	23.1326
38	广东未来屋数码科技有限公司	1998-11-26	2022-09-19	M	73	研究和试验发展	广东省	广州市	荔湾区	广州市荔湾区鹤洞路98号大院自编26号首层	113.285	23.1126
39	广东兴亿海洋生物工程股份有限公司 （曾用名：广东兴亿海洋生物工程有限公司）	2006-01-12	2020-07-31	M	73	研究和试验发展	广东省	广州市	黄埔区	广州市黄埔区光谱中路11号自编（2）栋2单元1004房	113.451	23.1655
40	一品红药业股份有限公司 （曾用名：广东一品红药业有限公司）	2002-02-04	2023-08-17	C	27	医药制造业	广东省	广州市	黄埔区	广州市黄埔区广州国际生物岛寰宇一路27号云润大厦17层	113.386	23.0759
41	广东粤禽育种有限公司	2002-09-20	2018-01-26	A	03	畜牧业	广东省	广州市	黄埔区	广州市萝岗区九龙镇佛塱村佛秋路旁	113.539	23.3744
42	广东中科琪林园林股份有限公司	2001-08-07	2023-07-28	N	78	公共设施管理业	广东省	广州市	天河区	广州市天河区沙河龙洞华南植物园内	113.374	23.1879
43	广东中望软件技术服务有限公司	2006-07-06	2023-02-03	I	65	软件和信息技术服务业	广东省	广州市	黄埔区	广东省广州市黄埔区科汇四街2号1103房	113.444	23.1725
44	广州安费诺电子通信有限公司	1993-03-08	2015-03-30	C	39	计算机、通信和其他电子设备制造业	广东省	广州市	黄埔区	广州市萝岗区科学城尖塔山路5号	113.253	23.2851
45	广州奥飞文化传播有限公司	2004-10-25	2020-11-16	R	86	新闻和出版业	广东省	广州市	越秀区	广州市越秀区太和岗路20号403号房	113.303	23.1486
46	广州倍绣生物技术有限公司	1995-03-15	2020-07-15	C	27	医药制造业	广东省	广州市	黄埔区	广州市高新技术产业开发区科学城瑞泰路5号	113.515	23.1582
47	广州城建开发设计院有限公司	1987-01-04	2023-08-31	E	47	房屋建筑业	广东省	广州市	天河区	广州市天河区天河北路天河北街9号首层	113.326	23.1457
48	广州创尔生物技术股份有限公司 （曾用名：广州创尔生物技术有限公司）	2002-08-20	2023-10-10	C	27	医药制造业	广东省	广州市	黄埔区	广州高新技术产业开发区香山路17号A栋4层1号	113.446	23.1856
49	广州创特技术有限公司	2000-05-16	2023-01-30	M	74	专业技术服务业	广东省	广州市	越秀区	广州市越秀区东风中路515号2307-2310室（仅限办公）	113.283	23.138
50	广州创赢智能科技有限公司	2005-01-07	2017-07-05	M	73	研究和试验发展	广东省	广州市	黄埔区	广州高新技术产业开发区科学城科学大道182号创新大厦C3区第五层501单元	113.462	23.172
51	广州达伯文信息科技有限公司	2005-08-31	2018-03-21	I	65	软件和信息技术服务业	广东省	广州市	黄埔区	广州经济技术开发区科学城彩频路11号A312	113.443	23.1679
52	广州德能热源设备有限公司	2005-08-11	2020-05-26	C	34	通用设备制造业	广东省	广州市	花都区	广州市花都区天贵路88号A座科技大楼711室；广州市番禺区钟村街钟屏岔道南侧1号厂房之一(一照多址）	113.23	23.4013
53	广州迪森家居环境技术有限公司 （曾用名：广州迪森家用锅炉制造有限公司）	2000-11-15	2022-12-15	D	44	电力、热力生产和供应业	广东省	广州市	黄埔区	广州经济技术开发区东区沧联二路5号	113.559	23.122
54	广州东昇机械有限公司	2002-05-31	2022-04-28	C	36	汽车制造业	广东省	广州市	花都区	广州市花都区新华街花港大道69号	113.159	23.3701
55	广州东芝白云自动化系统有限公司	2004-03-08	2022-08-15	C	38	电气机械和器材制造业	广东省	广州市	白云区	广州市白云区神山镇工业区大岭南路18号	113.209	23.3414
56	广州番禺速能冷暖设备有限公司	1988-08-04	2018-07-18	C	34	通用设备制造业	广东省	广州市	南沙区	广州市南沙区榄核镇人民村人绿路39号	113.358	22.8599
57	广州花海药业股份有限公司 （曾用名：广州固志医药科技有限公司）	2002-04-08	2019-01-30	C	27	医药制造业	广东省	广州市	黄埔区	广州市经济技术开发区科学城揽月路80号广州科技创新基地C区第六层	113.457	23.1657
58	广州广高高压电器有限公司	2000-11-07	2021-03-23	C	38	电气机械和器材制造业	广东省	广州市	黄埔区	广州市黄埔区云埔工业区云埔一路15号	113.545	23.1518
59	广州恒威厨房设备有限公司	1993-04-22	2015-05-08	C	38	电气机械和器材制造业	广东省	广州市	白云区	广州市白云区人和镇矮岗村第三工业区自编5号	113.28	23.368
60	广州恒星制冷设备集团有限公司 （曾用名：广州恒星冷冻机械制造有限公司）	1992-01-30	2019-03-18	C	34	通用设备制造业	广东省	广州市	黄埔区	广州经济技术开发区东区北片果园四路一号	113.521	23.1498
61	广州鸿蒙信息科技有限公司	2007-06-22	2022-10-26	I	65	软件和信息技术服务业	广东省	广州市	越秀区	广州市越秀区麓苑路51号403B16房	113.292	23.1479
62	广州华峰生物科技有限公司	2006-01-20	2023-03-01	M	73	研究和试验发展	广东省	广州市	黄埔区	广州市黄埔区开源大道188号十六栋501、601房	113.518	23.1611
63	柏科德包装（广州）有限公司 （曾用名：广州华根包装产品有限公司）	2004-01-15	2022-08-19	C	29	橡胶和塑料制品业	广东省	广州市	黄埔区	广州经济技术开发区东区东雅路13号	113.506	23.1485
64	广州汇安科技有限公司	1998-08-11	2022-09-23	I	65	软件和信息技术服务业	广东省	广州市	黄埔区	广州市黄埔区云埔街宏光路10号A座203室	113.551	23.1162
65	广州汇豪计算机科技开发有限公司	2006-11-24	2020-03-30	M	73	研究和试验发展	广东省	广州市	黄埔区	广州市黄埔区敏兴街11号305房	113.487	23.1875
66	广州霍斯通电气股份有限公司 （曾用名：广州霍斯通电气有限公司）	2001-12-30	2023-03-15	C	38	电气机械和器材制造业	广东省	广州市	黄埔区	广州经济技术开发区宝聚街8号2-5层	113.524	23.0665
67	广州嘉泰软件有限公司	2002-04-11	2019-08-29	M	73	研究和试验发展	广东省	广州市	天河区	广州市天河区中山大道89号14层1433-1436（仅限办公）	113.363	23.1409
68	广州万正药业有限公司 （曾用名：广州健心药业有限公司）	2004-04-01	2016-11-22	C	27	医药制造业	广东省	广州市	黄埔区	广州高新技术产业开发区广州科学城芳草甸路2号	113.449	23.1876
69	广州建通测绘地理信息技术股份有限公司 （曾用名：广州建通测绘技术开发有限公司）	1996-03-01	2023-04-24	I	65	软件和信息技术服务业	广东省	广州市	增城区	广州市增城区宁西街创立路5号	113.625	23.183
70	广州今泰科技股份有限公司 （曾用名：广州今泰科技有限公司）	2002-04-30	2023-07-05	C	35	专用设备制造业	广东省	广州市	天河区	广州市经济技术开发区骏功路22号之一（1）栋201自编1号	113.525	23.1371
71	广东精点数据科技股份有限公司 （曾用名：广州精点计算机科技有限公司）	2004-04-26	2023-10-23	I	65	软件和信息技术服务业	广东省	广州市	天河区	广州市天河区东莞庄路110号2栋401室	113.344	23.1604
72	广州经纶数码科技有限公司	2004-03-09	2016-08-02	I	65	软件和信息技术服务业	广东省	广州市	越秀区	广州市越秀区寺右新马路108号17B	113.315	23.1251
73	广州军软科技有限公司	1997-04-21	2019-04-04	M	73	研究和试验发展	广东省	广州市	天河区	广州市天河区广园东路2193号3001-3002房	113.324	23.1601
74	广州科莱瑞迪医疗器材股份有限公司 （曾用名：广州科莱瑞迪医疗器材有限公司）	2000-12-18	2023-09-28	M	73	研究和试验发展	广东省	广州市	番禺区	广州市经济技术开发区沙湾三街14号一至六楼	113.537	23.0725
75	广州科盛隆纸箱包装机械有限公司	1998-08-18	2023-03-22	C	22	造纸和纸制品业	广东省	广州市	番禺区	广州市番禺区石壁街石壁一村谢石公路77号	113.294	23.0006
76	南方电网数字电网科技（广东）有限公司 （曾用名：广州科腾信息技术有限公司）	2007-08-06	2023-06-29	D	44	电力、热力生产和供应业	广东省	广州市	黄埔区	广州市黄埔区光谱中路11号2栋3单元14层全层	113.451	23.1655
77	广州丽盈塑料有限公司	2006-01-05	2022-04-19	C	26	化学原料和化学制品制造业	广东省	广州市	增城区	广州市增城市增江街东区高科技工业基地	113.856	23.2755
78	广州力富科技有限公司 （曾用名：广州力富视频科技有限公司）	2004-05-31	2023-10-27	M	73	研究和试验发展	广东省	广州市	黄埔区	广州市黄埔区科学大道182号C3栋902房（仅限办公）	113.461	23.172
79	马瑞利汽车电子（广州）有限公司 （曾用名：广州马瑞利汽车仪表有限公司）	1995-10-30	2023-04-04	M	73	研究和试验发展	广东省	广州市	花都区	广州市花都区永利路2号整幢	113.247	23.3649
80	广州美能材料科技有限公司	2005-06-22	2021-09-30	M	73	研究和试验发展	广东省	广州市	南沙区	广州市南沙区小虎南二路26号自编二栋103（仅限办公）	113.549	22.8408
81	广州美仕数控设备制造有限公司	2003-09-10	2016-01-11	C	35	专用设备制造业	广东省	广州市	天河区	广州市天河区新塘街沐陂军营63房	113.404	23.1593
82	秘理普（广州）植物技术开发股份有限公司 （曾用名：广州秘理普植物技术开发有限公司）	2007-07-19	2018-11-16	M	73	研究和试验发展	广东省	广州市	黄埔区	广州高新技术产业开发区科学城科学大道182号C2区第4层404单元	113.442	23.166
83	广州名美科技有限公司 （曾用名：广州明美电子有限公司）	2004-11-26	2022-06-10	M	73	研究和试验发展	广东省	广州市	黄埔区	广州高新技术产业开发区科学城南云三路39号	113.453	23.1622
84	广州摩恩水暖器材有限公司	1995-06-15	2020-08-28	C	33	金属制品业	广东省	广州市	天河区	广州市天河区沙河上元岗	113.351	23.1816
85	广州南鸥卫浴用品有限公司	2002-01-11	2015-04-17	F	51	批发业	广东省	广州市	番禺区	广州市番禺区沙头街禺山西路联邦工业城内	113.34	22.9411
86	广东七洲科技股份有限公司 （曾用名：广州七洲信息科技有限公司）	2007-12-07	2020-05-18	M	73	研究和试验发展	广东省	广州市	天河区	广州市天河区软件路15号601室	113.42	23.1773
87	广州启生信息技术有限公司	2006-04-11	2021-11-12	I	65	软件和信息技术服务业	广东省	广州市	天河区	广州市天河区珠江东路13号1101室（仅限办公）	113.333	23.1266
88	广州塞维拉电梯轨道系统有限公司	1993-01-26	2023-08-02	C	33	金属制品业	广东省	广州市	番禺区	广州市番禺区石楼镇国贸大道南636号之二	113.481	22.987
89	广州三晶电气股份有限公司 （曾用名：广州三晶电气有限公司）	2005-09-19	2022-06-06	C	38	电气机械和器材制造业	广东省	广州市	黄埔区	广州高新技术产业开发区科学城荔枝山路9号	113.445	23.185
90	广州桑瑞通信设备有限公司	2002-06-27	2022-11-04	C	39	计算机、通信和其他电子设备制造业	广东省	广州市	黄埔区	广州高新技术产业开发区科学城开源大道182号	113.517	23.1627
91	广东中旗新材料股份有限公司 （曾用名：广州色丽装饰材料科技有限公司）	2010-07-22	2021-12-10	C	30	非金属矿物制品业	广东省	广州市	白云区	广州市白云区云城西路724号521房	113.271	23.1787
92	广州鼎捷软件有限公司 （曾用名：广州神州数码管理系统有限公司）	2003-03-25	2023-02-09	I	65	软件和信息技术服务业	广东省	广州市	黄埔区	广州市黄埔区映日路119号1701房	113.463	23.1778
93	广州市诚润电脑科技有限公司	2002-06-17	2015-07-14	I	65	软件和信息技术服务业	广东省	广州市	天河区	广州市天河区中山大道89号16层北7-8号房（本住所限写字楼功能）	113.363	23.1409
94	广州市鼎安交通科技股份有限公司 （曾用名：广州市鼎安交通科技有限公司）	2000-06-21	2022-05-05	M	73	研究和试验发展	广东省	广州市	白云区	广州市白云区北太路1633号广州民营科技园云安路7号自编1栋3楼	113.341	23.3015
95	广州市番科计算机有限公司	2004-08-05	2017-06-05	I	65	软件和信息技术服务业	广东省	广州市	番禺区	广州市番禺区桥南街汇景大道350号南区二座7梯201房	113.385	22.9268
96	广州市番禺区好友实业有限公司	1995-10-19	2019-07-10	C	29	橡胶和塑料制品业	广东省	广州市	番禺区	广州市番禺区钟村街工业开发区A区	113.324	22.9743
97	广州凡拓数字创意科技股份有限公司 （曾用名：广州市凡拓数码科技有限公司）	2002-09-24	2023-06-26	M	73	研究和试验发展	广东省	广州市	天河区	广州市天河区龙怡路117号2701、2703、2704、2705、2706、2707	113.352	23.1497
98	广州市高奈特网络科技有限公司	2006-09-12	2022-07-06	C	39	计算机、通信和其他电子设备制造业	广东省	广州市	荔湾区	广州市荔湾区花地大道中64号2508室（仅限办公）	113.241	23.1024
99	广州好迪集团有限公司 （曾用名：广州市好迪化妆品有限公司）	1992-08-10	2020-03-26	C	26	化学原料和化学制品制造业	广东省	广州市	白云区	广州市白云区广花三路386号	113.247	23.3033
100	广州市恒威建亿贸易有限公司	2002-09-05	2023-06-02	F	51	批发业	广东省	广州市	白云区	广州市白云区人和镇鹤龙七路423号418房（空港白云）	113.292	23.3484
101	广州市宏峰物流有限公司	2000-06-28	2022-01-26	G	58	多式联运和运输代理业	广东省	广州市	南沙区	广州市南沙区东涌镇鱼富街11号之三	113.456	22.8531
102	广州市华冠精冲零件有限公司	2000-09-21	2020-12-03	C	34	通用设备制造业	广东省	广州市	增城区	广州市增城区永宁街新建北路39号（增城经济技术开发区核心区内）	113.646	23.1818
103	广州市汇源通信建设监理有限公司	2001-03-13	2023-03-27	M	74	专业技术服务业	广东省	广州市	海珠区	广州市海珠区前进路塘边新街14号1栋首层、二层自编1	113.285	23.1126
104	广州市火马电子科技有限公司	2007-05-17	2022-04-19	M	74	专业技术服务业	广东省	广州市	番禺区	广州市番禺区大石街朝阳东路160号6楼608室	113.323	23.0325
105	广州市嘉特斯机电制造有限公司	1998-07-20	2018-06-29	C	34	通用设备制造业	广东省	广州市	花都区	广州市花都区狮岭镇山前大道南	113.223	23.4891
106	广州市捷信通科技发展有限公司	1998-08-17	2022-10-17	M	75	科技推广和应用服务业	广东省	广州市	越秀区	广州市越秀区先烈中路100-67号4楼自编405房	113.307	23.1475
107	广州市科锋高智能工程有限公司	2002-03-21	2016-12-29	M	73	研究和试验发展	广东省	广州市	天河区	广州市天河区龙口中路173号30楼3001-02、3101-02房（本住所仅限写字楼功能）	113.344	23.1393
108	广州市立本电器有限公司	2003-07-26	2014-12-18	C	38	电气机械和器材制造业	广东省	广州市	花都区	广州市花都区新华街莲塘村三东大道北	113.254	23.399
109	广州市力融计算机技术有限公司	2004-01-02	2023-07-11	I	65	软件和信息技术服务业	广东省	广州市	天河区	广州市天河区大观中路95号2栋503房（仅限办公）	113.413	23.1574
110	广州市领域软件科技有限公司 （曾用名：广州市联拓科技有限公司）	2000-12-25	2017-02-27	I	65	软件和信息技术服务业	广东省	广州市	越秀区	广州市越秀区先烈中路100号大院15号之一2楼201房（仅限办公用途）	113.306	23.1455
111	灵智自控（广州）股份有限公司 （曾用名：广州市灵智自动化系统控制有限公司）	1997-03-10	2023-01-03	I	65	软件和信息技术服务业	广东省	广州市	天河区	广州市天河区高普路1023号401室	113.42	23.179
112	广州市美柯船舶电气设备有限公司	2007-07-17	2021-12-20	C	37	铁路、船舶、航空航天和其他运输设备制造业	广东省	广州市	南沙区	广州市南沙区榄核镇广珠路132号厂房及综合楼	113.394	22.8603
113	广州市欧克地理信息技术有限公司	2002-05-08	2023-07-06	M	73	研究和试验发展	广东省	广州市	黄埔区	广州市黄埔区科学大道162号创意大厦B3栋502房	113.458	23.1699
114	广州市庆瑞电子科技有限公司	2002-01-09	2018-12-05	M	73	研究和试验发展	广东省	广州市	黄埔区	广州高新技术产业开发区光谱西路3号研发厂房二楼北侧	113.425	23.1645
115	广州市赛普电子科技有限公司	2006-07-07	2020-10-29	C	39	计算机、通信和其他电子设备制造业	广东省	广州市	黄埔区	广州市黄埔区科学大道48号2707房（仅限办公）	113.436	23.1706
116	广州市三环永新科技有限公司	2001-08-31	2020-11-16	M	73	研究和试验发展	广东省	广州市	天河区	广州市天河区建中路51-53号佳都新太大厦1号楼615室	113.379	23.1305
117	尚阳科技股份有限公司 （曾用名：广州市尚阳电子科技有限公司）	2003-08-26	2022-12-16	I	65	软件和信息技术服务业	广东省	广州市	天河区	广州市天河区华观路1933号万科云广场A栋610房（仅限办公用途）	113.411	23.1734
118	广州市天球实业有限公司	2001-04-03	2018-12-28	L	71	租赁业	广东省	广州市	白云区	广州市白云区三元里大道路合益街26-30号九楼	113.256	23.1814
119	广州市拓维信息有限公司	2000-02-23	2019-06-10	I	65	软件和信息技术服务业	广东省	广州市	天河区	广州市天河区沙太南路85号五楼521-A04	113.333	23.1758
120	广州市味研生物工程科技有限公司	2000-07-26	2022-09-22	M	73	研究和试验发展	广东省	广州市	黄埔区	广州高新技术产业开发区科学城揽月路3号广州国际企业孵化器G区G208房	113.454	23.1685
121	广州市文搏实业有限公司	2002-01-04	2016-09-29	C	33	金属制品业	广东省	广州市	白云区	广州市白云区神山镇工业园区振中路3号	113.279	23.1643
122	广东希普生物科技股份有限公司 （曾用名：广州市希普生物饲料有限公司）	1998-06-23	2021-05-28	C	26	化学原料和化学制品制造业	广东省	广州市	从化区	广州市从化区鳌头镇广韶路153号C3厂房	113.426	23.6609
123	广州市新泛联数码科技有限公司	2004-11-18	2017-08-28	M	73	研究和试验发展	广东省	广州市	番禺区	广州市番禺区南村镇里仁洞村冼庄金光大道北一街6号201	113.356	22.9965
124	广州市新豪精密科技有限公司 （曾用名：广州市新豪精密五金制品有限公司）	2002-06-19	2021-11-22	M	73	研究和试验发展	广东省	广州市	增城区	广州市增城区仙村镇岳湖村上围朱仙路8号	113.715	23.2216
125	广东盈智通科技有限公司 （曾用名：广州市新康博思信息技术有限公司）	2006-10-25	2023-07-26	I	65	软件和信息技术服务业	广东省	广州市	天河区	广州市天河区天河直街30号3501房（仅限办公）	113.326	23.141
126	广州市忆科计算机系统有限公司	2001-05-21	2017-03-02	I	65	软件和信息技术服务业	广东省	广州市	天河区	广州市天河区科韵路16号自编1栋301-A2房	113.378	23.1314
127	广州市住邦建材发展有限公司	2006-08-31	2023-02-28	C	33	金属制品业	广东省	广州市	花都区	广州市花都区花东镇高信二路4号（机场高新科技产业园内）	113.375	23.4524
128	广州市鑫路交通科技有限公司	2004-03-07	2022-12-29	M	73	研究和试验发展	广东省	广州市	黄埔区	广州市黄埔区科学大道162号创意大厦B1栋308房	113.456	23.1695
129	广州松下空调器有限公司	1993-06-07	2023-10-24	C	38	电气机械和器材制造业	广东省	广州市	番禺区	广州市番禺区钟村万宝基地万宝北街28号	113.311	23.0012
130	广州天网安防科技有限公司	2005-03-02	2023-08-11	M	73	研究和试验发展	广东省	广州市	天河区	广州市天河区棠东村广棠西路13号一栋202（仅限办公）	113.392	23.1443
131	广州天夏科技有限公司	2000-05-24	2019-12-25	M	73	研究和试验发展	广东省	广州市	天河区	广州市天河区科韵路16号广州信息港A栋7楼C3单元	113.38	23.1323
132	广州天逸电子有限公司	1999-06-28	2020-11-10	C	39	计算机、通信和其他电子设备制造业	广东省	广州市	番禺区	广州市番禺区大石街鸿盛三路1号2栋701室	113.301	23.0153
133	广州威固环保设备有限公司	2001-12-23	2023-01-13	C	35	专用设备制造业	广东省	广州市	番禺区	广州市番禺区沙头街汀根村大板工业区一街22号2号厂房101房、202房	113.334	22.9449
134	广州新华时代数据系统有限公司	1999-05-07	2019-04-22	M	73	研究和试验发展	广东省	广州市	天河区	广州市天河区天河东路67号丰兴广场A座第24楼01室（仅限办公）（不可作厂房使用）	113.34	23.1381
135	广州洋基信息科技有限公司	2006-07-17	2022-02-08	I	64	互联网和相关服务	广东省	广州市	天河区	广州市天河区白沙水路69号五楼501室（仅限办公）（不可作厂房使用）	113.356	23.1831
136	广州翼锋信息科技有限公司	2003-06-26	2023-10-09	I	65	软件和信息技术服务业	广东省	广州市	天河区	广州市天河区黄埔大道西120号2801房（部位：自编C房）（仅限办公）（不可作厂房使用）	113.346	23.1316
137	广州银汉科技有限公司	2001-11-15	2023-04-14	I	64	互联网和相关服务	广东省	广州市	天河区	广州市天河区黄埔大道中666号701房（仅限办公）	113.357	23.1304
138	广州永大不锈钢有限公司	1994-07-04	2022-08-19	C	33	金属制品业	广东省	广州市	花都区	广州市花都区花山镇小布村	113.27	23.4183
139	广州永康包装材料有限公司	2006-08-11	2021-05-07	C	22	造纸和纸制品业	广东省	广州市	黄埔区	广州市黄埔区沧联一路5号101房自编106（仅限办公）	113.553	23.1242
140	广州永通音像制作有限公司	1991-12-28	2021-06-03	C	23	印刷和记录媒介复制业	广东省	广州市	番禺区	广州市番禺区沙湾镇福涌村工业区沙渡公路	113.345	22.924
141	广州云金地数码科技有限公司	2003-03-20	2016-09-27	M	73	研究和试验发展	广东省	广州市	天河区	广州市天河区高唐新建区高普路1035号2层东01（本住所限写字楼功能）	113.418	23.1784
142	广州造纸股份有限公司	1993-09-29	2023-05-31	C	22	造纸和纸制品业	广东省	广州市	南沙区	广州市南沙区珠江街新广一路29号	113.517	22.7403
143	广州中大百迅信息技术有限公司	2004-06-28	2022-07-05	M	73	研究和试验发展	广东省	广州市	越秀区	广州市越秀区先烈中路80号汇华商贸大厦5层501单元自编F016号	113.302	23.1426
144	广州瀚信通信科技股份有限公司 （曾用名：广州瀚信通信科技有限公司）	2006-12-14	2023-10-26	I	65	软件和信息技术服务业	广东省	广州市	天河区	广州市天河区元岗横路37号4203-1、4204、4205、4208、4209、4304--4309	113.346	23.1818
145	广州熵能创新材料股份有限公司 （曾用名：广州熵能聚合物技术有限公司）	2003-12-30	2023-01-12	M	73	研究和试验发展	广东省	广州市	番禺区	广州市番禺区东环街番禺大道北555号番禺节能科技园内天安科技交流中心901	113.374	22.9862
146	广州钜讯网络科技有限公司	2006-06-09	2015-01-19	M	74	专业技术服务业	广东省	广州市	天河区	广州市天河区思成路1号2层207号	113.423	23.1784
147	京信通信系统（广州）有限公司	1997-01-03	2018-12-04	I	63	电信、广播电视和卫星传输服务	广东省	广州市	黄埔区	广州经济技术开发区金碧路6号。	113.526	23.057
148	加达利汽车电子（广州）有限公司 （曾用名：鸟取三洋电机（广州）有限公司）	1995-12-19	2023-07-04	C	39	计算机、通信和其他电子设备制造业	广东省	广州市	黄埔区	广州市黄埔区兴达路3号	113.545	23.1305
149	施耐德（广州）母线有限公司	1995-11-24	2022-11-17	C	38	电气机械和器材制造业	广东省	广州市	黄埔区	广州经济技术开发区东区骏业路85号	113.533	23.1413
150	松下万宝美健生活电器（广州）有限公司 （曾用名：松下电工·万宝电器（广州）有限公司）	1993-12-29	2023-05-29	C	38	电气机械和器材制造业	广东省	广州市	番禺区	广州市番禺区钟村万宝基地万宝北街33号	113.312	22.9996
151	天祥（广州）技术服务有限公司	1999-10-18	2023-09-01	M	75	科技推广和应用服务业	广东省	广州市	南沙区	广州市南沙区黄阁镇新海新一路3号-1	113.521	22.8586
152	扬子江药业集团广州海瑞药业有限公司	2004-04-19	2021-08-18	C	27	医药制造业	广东省	广州市	黄埔区	广州高新技术产业开发区广州科学城香山路31号	113.455	23.1878
153	广州华工环源绿色包装技术股份有限公司 （曾用名：广州华工环源绿色包装技术有限公司）	2000-09-07	2022-12-06	M	74	专业技术服务业	广东省	广州市	天河区	广州高新技术产业开发区科学城科汇四街1号1101-2房	113.444	23.1734
154	广州市设计院	2004-10-13	-	M	74	专业技术服务业	广东省	广州市	天河区	广州市体育东路体育东横街3号	113.336	23.135
155	广州日宝钢材制品有限公司	1994-02-25	2023-08-28	C	32	有色金属冶炼和压延加工业	广东省	广州市	番禺区	广州市番禺区钟村万宝基地万宝中二街8号	113.31	22.9983
156	广州卫富科技开发有限公司	1998-05-25	2021-03-17	M	73	研究和试验发展	广东省	广州市	从化区	广东从化经济开发区宝泰路12号（厂房）	113.515	23.4582
157	广州粤能电力科技开发有限公司	1993-02-22	2023-05-11	M	73	研究和试验发展	广东省	广州市	越秀区	广州市越秀区先烈中路83号凯城华庭五楼502室（不可作厂房使用）	113.306	23.1481
158	中科院广州化灌工程有限公司	1993-08-19	2022-08-18	E	48	土木工程建筑业	广东省	广州市	天河区	广州市天河区兴科路368号实验楼壹楼133-136房	113.368	23.1796
159	ＬＧ化学（广州）工程塑料有限公司 （曾用名：LG化学（广州）工程塑料有限公司）	2002-07-23	2023-05-16	C	29	橡胶和塑料制品业	广东省	广州市	黄埔区	广州经济技术开发区东区业成一路1号	113.271	23.1353
160	阿波罗（中国）有限公司	2003-09-27	2022-11-08	C	26	化学原料和化学制品制造业	广东省	广州市	黄埔区	广州市黄埔区科学大道18号A栋803房	113.43	23.1706
161	爱立信移动数据应用技术研究开发（广州）有限公司	2004-12-22	2023-09-11	M	73	研究和试验发展	广东省	广州市	天河区	广州市天河区天河软件园建中路44-46号六楼	113.378	23.1306
162	奥普镀膜技术（广州）有限公司	2003-01-06	2022-08-02	C	39	计算机、通信和其他电子设备制造业	广东省	广州市	黄埔区	广州经济技术开发区蓝玉四街九号5号厂房1楼	113.533	23.0642
163	霸王（广州）有限公司	2005-04-13	2023-07-05	M	73	研究和试验发展	广东省	广州市	南沙区	广州市南沙区丰泽东路106号（自编1号楼）13层1301房自编X1301-A767号（仅限办公用途）（JM）	113.538	22.7953
164	宝供物流企业集团有限公司	1999-09-27	2023-04-07	G	58	多式联运和运输代理业	广东省	广州市	天河区	广州市天河区龙口东路宝供大厦	113.347	23.1504
165	北方光电科技有限公司 （曾用名：北方光电科技股份有限公司）	2000-09-04	2018-09-19	C	39	计算机、通信和其他电子设备制造业	广东省	广州市	黄埔区	广东省广州市萝岗区广州开发区沙湾二街13、15号602B房	113.537	23.0719
166	广州广信感光材料有限公司 （曾用名：长兴（广州）精细涂料有限公司）	2003-07-11	2020-09-16	C	26	化学原料和化学制品制造业	广东省	广州市	黄埔区	广州经济技术开发区东区骏达路182号	113.525	23.1462
167	丰铁塑机（广州）有限公司	2002-10-30	2022-09-05	C	35	专用设备制造业	广东省	广州市	花都区	广州市花都区新雅街华兴工业区	113.242	23.3528
168	高露洁棕榄（中国）有限公司	1995-11-24	2023-02-13	C	26	化学原料和化学制品制造业	广东省	广州市	黄埔区	广州经济技术开发区青年路338号	113.542	23.0707
169	广东奥迪安监控技术股份有限公司 （曾用名：广东奥迪安监控技术有限公司）	2003-04-15	2020-08-07	M	74	专业技术服务业	广东省	广州市	黄埔区	广州市萝岗区广州开发区科学城起云路6号自编一栋四层404-406、408-415房	113.434	23.173
170	广东大华仁盛科技集团有限公司 （曾用名：广东大华仁盛科技有限公司）	2003-05-07	2016-01-22	F	51	批发业	广东省	广州市	白云区	广州市白云区太和镇广州民营科技园科盛路1号	113.34	23.3044
171	广东丹利科技有限公司	2004-08-04	2020-11-02	M	73	研究和试验发展	广东省	广州市	天河区	广州市天河区龙口东路342-360号天诚广场312室	113.347	23.148
172	广东东软软件有限公司	2001-08-08	2012-12-24	M	75	科技推广和应用服务业	广东省	广州市	天河区	广州市天河区天河北路890号国际科贸中心13楼	113.351	23.1471
173	广东高奇环保技术有限公司	1999-06-28	2017-03-03	E	50	建筑装饰、装修和其他建筑业	广东省	广州市	天河区	广东省广州市天河区华强路1号902A-3房号	113.323	23.1327
174	广东共享信息技术有限公司	2003-08-06	2019-09-01	M	73	研究和试验发展	广东省	广州市	天河区	广东省广州市天河区龙口西路100号六楼	113.343	23.1432
175	广东广凌信息科技股份有限公司 （曾用名：广东广凌计算机科技股份有限公司）	1998-04-15	2022-06-07	I	65	软件和信息技术服务业	广东省	广州市	天河区	广州市天河区五山路248号2702房自编01、02	113.353	23.1497
176	广东汉佳信息技术有限公司	2000-06-30	2020-10-15	I	65	软件和信息技术服务业	广东省	广州市	天河区	广州市天河区灵山东路3号201室（部位：3、4、7）	113.431	23.1343
177	广东金泽润技术有限公司 （曾用名：广东互维科技有限公司）	2001-06-22	2021-03-23	M	73	研究和试验发展	广东省	广州市	黄埔区	广州市黄埔区科学大道162号B2栋1003房	113.457	23.17
178	广东华仝九方科技有限公司 （曾用名：广东华工九方科技有限公司）	2001-01-18	2022-06-15	I	65	软件和信息技术服务业	广东省	广州市	荔湾区	广州市荔湾区光复北路508号2027房	113.259	23.1287
179	广东建科建筑工程技术开发有限公司	2000-01-26	2023-06-28	E	47	房屋建筑业	广东省	广州市	天河区	广州市天河区先烈东路131号广东工业大学科技园C栋601室	113.314	23.1547
180	广东金冠科技发展有限公司	2000-05-12	2021-11-12	C	39	计算机、通信和其他电子设备制造业	广东省	广州市	黄埔区	广州市黄埔区南岗云埔工业区骏丰路111号	113.561	23.1005
181	广东久其软件有限公司	2001-11-26	2019-09-01	I	65	软件和信息技术服务业	广东省	广州市	天河区	广州市天河区员村二横路1号1006室	113.368	23.1286
182	广东励康信息技术有限公司	2002-01-08	2023-11-03	I	65	软件和信息技术服务业	广东省	广州市	天河区	广州市天河区中山大道中439号1026室1027室	113.385	23.1327
183	广东凌云创展通信技术有限公司	2003-03-24	2021-09-02	I	63	电信、广播电视和卫星传输服务	广东省	广州市	越秀区	广州市越秀区寺右新马路北二街26号之一二层210室之一	113.32	23.1268
184	保利长大工程有限公司 （曾用名：广东省长大公路工程有限公司）	1986-12-05	2021-11-05	E	48	土木工程建筑业	广东省	广州市	天河区	广州市天河区广州大道中942号	113.335	23.2072
185	广东省电子商务认证有限公司	2000-08-17	2022-08-23	C	39	计算机、通信和其他电子设备制造业	广东省	广州市	越秀区	广州市越秀区建设五马路1号德安大厦三楼	113.291	23.1398
186	广东省基础工程集团有限公司 （曾用名：广东省基础工程公司）	1980-12-29	2022-03-22	E	48	土木工程建筑业	广东省	广州市	天河区	广州市天河区天河路９９号天涯楼１９－２０层	113.325	23.1401
187	广东省建筑设计研究院	2002-01-09	-	M	74	专业技术服务业	广东省	广州市	越秀区	广州市流花路97号	113.259	23.1456
188	广东省食品工业研究所	2017-03-13	-	M	73	研究和试验发展	广东省	广州市	海珠区	广州市海珠区新港东路146号	113.348	23.103
189	广东省造纸研究所	1996-07-23	2022-03-04	C	26	化学原料和化学制品制造业	广东省	广州市	海珠区	广州市新港西路154号	113.308	23.0982
190	广东网域科技有限公司	2002-07-23	2023-09-04	I	64	互联网和相关服务	广东省	广州市	天河区	广州市天河区中山大道建工路15号首层	113.379	23.1287
191	广东兴邦产业信息传播有限公司	2005-01-17	2015-03-26	I	65	软件和信息技术服务业	广东省	广州市	天河区	广州市天河区金穗路6-20号星汇国际大厦703、705房	113.323	23.1295
192	广东盈信信息投资有限公司	2000-01-26	2022-12-06	J	69	其他金融业	广东省	广州市	黄埔区	广东省广州市黄埔区高新技术产业开发区科学大道121号606房	113.447	23.1717
193	广东友元国土信息工程有限公司	2004-06-10	2022-04-19	N	79	土地管理业	广东省	广州市	天河区	广州市天河区能源路4号1001室1002室（仅限办公）	113.353	23.1706
194	广东真内控科技有限公司 （曾用名：广东中融兴信息工程有限公司）	2000-06-16	2020-12-22	M	73	研究和试验发展	广东省	广州市	天河区	广州市天河区景邮路12号1520房自编之一	113.373	23.1403
195	广东珠荣工程设计有限公司	1993-08-25	2023-11-01	E	48	土木工程建筑业	广东省	广州市	天河区	广州市天河区天寿路105号天寿大厦6-7楼	113.339	23.1536
196	广东灏瀚科技有限公司	2004-05-18	2023-01-09	I	65	软件和信息技术服务业	广东省	广州市	白云区	广州市白云区京溪路201号315房	113.338	23.1872
197	广州埃信电信设备有限公司	2002-07-23	2022-10-11	C	39	计算机、通信和其他电子设备制造业	广东省	广州市	天河区	广州市天河区高普路83号A栋206房（仅限办公）（不可作厂房使用）	113.418	23.1928
198	广州艾诺网络科技有限公司	2006-03-17	2020-01-10	I	65	软件和信息技术服务业	广东省	广州市	天河区	广州市天河区五山路285号301房（仅限办公）	113.35	23.1499
199	爱立信信息技术服务（中国）有限公司 （曾用名：广州爱立信通信服务有限公司）	2005-12-29	2023-07-20	I	65	软件和信息技术服务业	广东省	广州市	天河区	广州市天河区科韵路16号自编1栋1701-3房	113.378	23.1314
200	广州安华电子有限责任公司	1994-07-30	2018-03-26	C	39	计算机、通信和其他电子设备制造业	广东省	广州市	荔湾区	广州市荔湾区白鹤洞坑口罗冲岗3号	113.242	23.0821
201	广州安健实业发展有限公司	1999-01-05	2020-11-30	M	73	研究和试验发展	广东省	广州市	海珠区	广州市海珠区新港东路1000号2110房（仅限办公）	113.373	23.1031
202	广州安易医疗软件有限公司	2005-02-06	2012-06-18	M	73	研究和试验发展	广东省	广州市	越秀区	广州市越秀区先烈中路80号汇华商贸大厦11J	113.302	23.1426
203	广州白云山光华制药股份有限公司	1993-01-30	2022-05-12	C	27	医药制造业	广东省	广州市	海珠区	广州市海珠区南石路一号	113.268	23.0813
204	广州白云山制药股份有限公司	1992-12-22	2015-01-23	C	27	医药制造业	广东省	广州市	白云区	广州市白云区同和街云祥路88号	113.329	23.2091
205	广州白云液压机械厂有限公司	2003-01-30	2022-06-21	C	35	专用设备制造业	广东省	广州市	白云区	广州市白云区蚌湖镇杨屋岗路自编2号	113.279	23.1643
206	广州标点医药信息股份有限公司 （曾用名：广州标点医药信息有限公司）	2005-07-01	2022-11-17	I	65	软件和信息技术服务业	广东省	广州市	越秀区	广州市越秀区东风东路745号1503、1504房（仅限办公用途）	113.311	23.1382
207	广州博商软件技术有限公司	2006-04-12	2016-12-22	I	65	软件和信息技术服务业	广东省	广州市	越秀区	广州市越秀区先烈中路80号首层A206房	113.302	23.1427
208	广州彩熠灯光股份有限公司 （曾用名：广州彩熠灯光有限公司）	2007-05-16	2023-06-02	C	38	电气机械和器材制造业	广东省	广州市	白云区	广州市白云区广州民营科技园科泰一路46号	113.305	23.3017
209	广州科泰智慧有限公司 （曾用名：广州创维平面显示科技有限公司）	2007-11-30	2022-08-24	C	39	计算机、通信和其他电子设备制造业	广东省	广州市	黄埔区	广州经济技术开发区科学城开达路99号	113.488	23.1792
210	广州大洋元亨化工有限公司	1999-01-08	2022-03-18	C	26	化学原料和化学制品制造业	广东省	广州市	增城区	广州市增城中新镇大田工业区（中福南路51号）	113.631	23.3002
211	广州德易计算机科技有限公司	2002-10-30	2020-08-27	M	73	研究和试验发展	广东省	广州市	越秀区	广州市越秀区东风东路733（1）号自编一楼13自编之二十五房号	113.285	23.1126
212	广州德银电子科技有限公司	2005-08-15	2023-05-12	M	73	研究和试验发展	广东省	广州市	越秀区	广州市越秀区东风中路363号1202房	113.276	23.138
213	广州迪宝乐电子有限公司	1998-08-26	2021-09-06	C	39	计算机、通信和其他电子设备制造业	广东省	广州市	黄埔区	广州市黄埔区大沙街道文加路莲塘段2号（门口田厂房）（自主申报）	113.469	23.1451
214	广州顶力电子有限公司	2004-10-08	2012-10-08	C	39	计算机、通信和其他电子设备制造业	广东省	广州市	黄埔区	广州市黄埔区荔联街沧联二路五社工业区3号厂房	113.559	23.122
215	高勋绿色智能装备（广州）有限公司 （曾用名：广州番禺高勋染整设备制造有限公司）	1997-12-15	2022-10-12	C	38	电气机械和器材制造业	广东省	广州市	番禺区	广州市番禺区东环街东艺路139号3栋501号房屋之一至四	113.349	22.985
216	广州飞歌汽车音响有限公司	2007-10-12	2023-06-07	C	39	计算机、通信和其他电子设备制造业	广东省	广州市	黄埔区	广州高新技术产业开发区南翔三路11号二、三栋	113.452	23.1547
217	广州飞机维修工程有限公司	1989-10-28	2023-04-06	G	56	航空运输业	广东省	广州市	花都区	广州花都区白云国际机场北区横十路	113.312	23.4028
218	广州风神汽车有限公司	2001-12-04	2022-01-06	C	36	汽车制造业	广东省	广州市	花都区	广州市花都区新华镇风神大道8号	113.175	23.3863
219	风神物流有限公司 （曾用名：广州风神物流有限公司）	2002-09-03	2023-07-26	G	59	装卸搬运和仓储业	广东省	广州市	花都区	广州市花都区九塘路八号	113.174	23.3963
220	广州烽火通信科技有限公司	2007-01-16	2020-07-29	M	73	研究和试验发展	广东省	广州市	越秀区	广州市越秀区先烈中路83号506自编之三房（仅限办公使用）	113.306	23.1479
221	广州高勤计算机科技有限公司	2003-08-09	2017-05-02	M	73	研究和试验发展	广东省	广州市	天河区	广州市天河区天河北路892号709房（本住所限写字楼功能）	113.351	23.1471
222	广州戈兰迪新材料股份有限公司 （曾用名：广州戈兰迪高分子材料有限公司）	2000-11-24	2023-05-23	C	26	化学原料和化学制品制造业	广东省	广州市	花都区	广州市花都区新华工业区新都大道旁	113.209	23.4079
223	广州耕海科技开发有限公司	2000-09-14	2016-12-19	M	73	研究和试验发展	广东省	广州市	越秀区	广州市越秀区中山三路33号B塔4811B	113.289	23.1317
224	广州广牧丰生物技术有限公司	2002-11-13	2021-07-15	M	73	研究和试验发展	广东省	广州市	黄埔区	广州市黄埔区敏兴街5号403房（仅限办公）	113.487	23.1875
225	广州广日物流有限公司	1998-10-30	2023-10-11	G	58	多式联运和运输代理业	广东省	广州市	番禺区	广州市番禺区大石街石北工业区（大维村、诜村“二号围”、官坑村“岗脚”）	113.302	23.0187
226	广州广一泵业有限公司	2004-12-10	2021-02-23	C	34	通用设备制造业	广东省	广州市	海珠区	广州市海珠区新滘南路北山村桥头大街228号之三3005房（仅限办公）	113.377	23.0907
227	广州广重企业集团有限公司	1967-04-20	2020-11-10	C	35	专用设备制造业	广东省	广州市	海珠区	广州市海珠区工业大道122号	113.261	23.0895
228	广州宏图电子科技有限公司	2004-08-27	2022-04-15	M	73	研究和试验发展	广东省	广州市	番禺区	广州市番禺区大石街石北路644号巨大创意产业园15栋101	113.294	23.0207
229	广州宏镓电子材料科技有限公司	2004-06-11	2018-09-04	C	39	计算机、通信和其他电子设备制造业	广东省	广州市	黄埔区	广州市萝岗区云埔一路一号	113.536	23.1523
230	广州华成电器股份有限公司	1993-12-21	2015-10-21	C	38	电气机械和器材制造业	广东省	广州市	白云区	广州市白云区北太路1633号广州民营科技园科华路13号	113.341	23.3015
231	广州华鸿网络科技有限公司	2005-07-25	2020-08-31	M	73	研究和试验发展	广东省	广州市	黄埔区	广州市黄埔区神舟路9号1栋220-239号创想1号众创空间办公卡位A94号（仅限办公）	113.438	23.1754
232	广州华凌空调设备有限公司	1993-05-10	2023-02-23	C	38	电气机械和器材制造业	广东省	广州市	南沙区	广州市南沙区美德一路6号	113.542	22.7258
233	广州化学试剂厂	1965-04-12	2023-04-19	C	26	化学原料和化学制品制造业	广东省	广州市	海珠区	广州市海珠区工业大道南882号	113.277	23.0897
234	广州惠禾电子有限责任公司	2006-06-27	2022-05-27	C	39	计算机、通信和其他电子设备制造业	广东省	广州市	天河区	广州市天河区东莞庄路110号37栋（201）（仅限办公）	113.344	23.1604
235	广州江河幕墙系统工程有限公司	2007-06-18	2023-03-13	E	50	建筑装饰、装修和其他建筑业	广东省	广州市	增城区	广州市增城新塘镇创新大道25号	113.639	23.1674
236	广州金凯新材料有限公司	2006-01-10	2021-11-26	C	33	金属制品业	广东省	广州市	黄埔区	广州高新技术产业开发区科学城科丰路31号华南新材料创新园G1栋1005号	113.466	23.1551
237	广州金蟾软件研发中心有限公司	2001-07-23	2016-10-21	M	73	研究和试验发展	广东省	广州市	黄埔区	广州市萝岗区伴河路96号自编一栋6层608-8至608-11	113.518	23.1595
238	广州精益汽车空调有限公司	2000-03-06	2015-12-07	C	36	汽车制造业	广东省	广州市	花都区	广州市花都区花山镇平山民营工业园7号	113.276	23.4385
239	广州骏发电气有限公司	2005-12-31	2020-01-07	C	38	电气机械和器材制造业	广东省	广州市	番禺区	广州市番禺区桥南街金睿三街28号（金睿三街28号商业二栋）101房	113.382	22.9196
240	广州骏丰医疗器械有限公司	2000-08-28	2019-01-17	C	35	专用设备制造业	广东省	广州市	黄埔区	广州市黄埔区骏丰路38号（自主申报）	113.56	23.099
241	广州蓝奇电子实业有限公司	2001-09-19	2023-02-14	C	40	仪器仪表制造业	广东省	广州市	番禺区	广州市番禺区化龙镇金阳一路200号1栋201房	113.464	22.9996
242	广州蓝图地理信息技术有限公司	2004-08-02	2023-08-31	I	65	软件和信息技术服务业	广东省	广州市	天河区	广州市天河区长福路219号H3房	113.355	23.172
243	广州朗昇网络科技有限公司	1996-11-29	2022-03-30	M	73	研究和试验发展	广东省	广州市	越秀区	广州市越秀区寺右新马路174号10层自编A房	113.319	23.1246
244	广州朗晴电动车有限公司	2000-01-25	2020-12-24	C	37	铁路、船舶、航空航天和其他运输设备制造业	广东省	广州市	南沙区	广州市南沙区东涌镇太石村	113.407	22.8873
245	联欣科技投资（广州）有限公司 （曾用名：广州联欣自动识别技术有限公司）	2002-04-05	2021-12-22	M	73	研究和试验发展	广东省	广州市	黄埔区	广州高新技术产业开发区科学大道绿地智慧广场C2栋902	113.437	23.1699
246	广州林叶机电科技有限公司	2001-12-21	2020-08-24	C	37	铁路、船舶、航空航天和其他运输设备制造业	广东省	广州市	从化区	广州市从化区城郊街大夫田村华林路55号	113.552	23.573
247	广州岭南电缆股份有限公司 （曾用名：广州岭南电缆有限公司）	1995-12-19	2023-09-01	C	38	电气机械和器材制造业	广东省	广州市	南沙区	广州市南沙区榄核镇人绿路163号自编一栋、自编二栋、自编四栋、自编五栋、自编六栋、自编七栋、自编八栋、自编九栋	113.352	22.8593
248	广州中滔绿由环保科技有限公司 （曾用名：广州绿由工业弃置废物回收处理有限公司）	2000-11-29	2021-12-16	M	73	研究和试验发展	广东省	广州市	南沙区	广州市南沙区横沥镇合兴路56号（横沥所）	113.508	22.7528
249	广东达元绿洲食品安全科技股份有限公司 （曾用名：广州绿洲生化科技有限公司）	2006-04-26	2023-10-12	M	73	研究和试验发展	广东省	广州市	黄埔区	广州市高新技术产业开发区科学城开源大道11号A2栋第三层	113.502	23.1594
250	广州麦德医像科技有限公司	2003-09-04	2023-07-31	I	65	软件和信息技术服务业	广东省	广州市	天河区	广州市天河区天河北路906号1502、1503房	113.351	23.1464
251	广州麦芽有限公司	1987-05-20	2020-11-06	C	13	农副食品加工业	广东省	广州市	黄埔区	广州经济技术开发区创业路2号	113.525	23.0628
252	广州迈络信息科技股份有限公司 （曾用名：广州迈络信息科技有限公司）	2006-07-03	2022-03-15	M	73	研究和试验发展	广东省	广州市	天河区	广州市天河区天河北路233号中信广场办公楼6406A房	113.331	23.1481
253	广州敏惠汽车零部件有限公司	2001-02-21	2023-10-31	C	36	汽车制造业	广东省	广州市	黄埔区	广州经济技术开发区永和经济区永顺大道西4号	113.554	23.206
254	广州敏瑞汽车零部件有限公司	2004-03-15	2022-04-28	C	36	汽车制造业	广东省	广州市	黄埔区	广州经济技术开发区永和区永顺大道西9号	113.55	23.2065
255	广州南天佳信信息工程有限公司	2005-08-25	2017-04-18	M	73	研究和试验发展	广东省	广州市	番禺区	广州市番禺区大石街石北路644号巨大创意产业园15栋121	113.294	23.0207
256	广州普瑞电力控制系统设备有限公司	2000-03-29	2023-08-21	M	74	专业技术服务业	广东省	广州市	黄埔区	广州高新技术产业开发区科学城南云三路39号B栋三楼301房	113.453	23.1622
257	广州全通数码科技有限公司	2000-08-09	2022-08-24	M	73	研究和试验发展	广东省	广州市	海珠区	广州市海珠区敦和路189号大院第3栋自编601-605	113.326	23.0944
258	广州荣迅信息科技有限公司	2005-04-29	2016-06-30	M	73	研究和试验发展	广东省	广州市	海珠区	广州市海珠区工业大道北67号1号楼自编606A室（仅限办公用途）	113.285	23.1126
259	安婕妤化妆品科技股份有限公司 （曾用名：广州瑞商丰银生物科技有限公司）	2002-08-22	2023-03-22	C	26	化学原料和化学制品制造业	广东省	广州市	花都区	广州市花都区新华街花港大道23号	113.154	23.364
260	广州赛宝腾睿信息科技有限公司	2006-08-14	2022-05-09	M	73	研究和试验发展	广东省	广州市	天河区	广州市天河区东莞庄路110号科研综合楼601-612房	113.344	23.1604
261	广州赛能冷藏科技有限公司	2004-09-27	2016-11-11	M	73	研究和试验发展	广东省	广州市	黄埔区	广州市高新技术产业开发区科学城科研路16号D2栋自编105房	113.449	23.1765
262	广州尚恩科技股份有限公司 （曾用名：广州尚恩科技有限公司）	2003-06-04	2023-10-17	I	65	软件和信息技术服务业	广东省	广州市	天河区	广州市天河区黄埔大道路159号8E房	113.331	23.1336
263	广州市博仕奥生化技术研究有限公司	2001-08-06	2022-10-13	M	73	研究和试验发展	广东省	广州市	黄埔区	广州市黄埔区永安大道118号1号厂房601房	113.58	23.2215
264	广州市长胜焊接设备实业有限公司	1996-09-23	2018-06-28	C	38	电气机械和器材制造业	广东省	广州市	白云区	广州市白云区长钟西路207号101房	113.416	23.3975
265	广州市诚一水产科技有限公司	2002-11-06	2021-12-24	M	73	研究和试验发展	广东省	广州市	番禺区	广州市番禺区桥南街陈涌村陈涌东三巷6号101	113.379	22.9245
266	广州市诚毅科技软件开发有限公司	1999-03-15	2022-12-13	I	65	软件和信息技术服务业	广东省	广州市	海珠区	广州市海珠区广州大道南368号26楼	113.336	23.2143
267	广东道一信息技术股份有限公司 （曾用名：广州市道一信息技术有限公司）	2004-03-08	2022-07-12	I	65	软件和信息技术服务业	广东省	广州市	天河区	广州市天河区员村一横路7号大院1号自编之首层南部、4、8层单元	113.362	23.1259
268	广州市德邦物流服务有限公司	2000-08-08	2023-08-07	G	58	多式联运和运输代理业	广东省	广州市	白云区	广州市白云区白云大道北自编586号之五	113.305	23.2445
269	广州虎辉通用照明有限公司 （曾用名：广州市电筒工业公司）	1968-05-02	2023-08-01	C	38	电气机械和器材制造业	广东省	广州市	荔湾区	广州市荔湾区西华路134号	113.252	23.1379
270	广州市二轻研究所股份有限公司 （曾用名：广州市二轻工业科学技术研究所）	1990-11-03	2023-05-09	M	75	科技推广和应用服务业	广东省	广州市	黄埔区	广州高新技术产业开发区科学城科研路6号	113.447	23.1752
271	广州市番禺大龙玻璃厂有限公司	1989-01-28	2018-09-06	C	30	非金属矿物制品业	广东省	广州市	番禺区	广州市番禺区大龙街大龙村新村大街北八巷4号101	113.436	22.9655
272	广州市科腾智能装备股份有限公司 （曾用名：广州市番禺科腾工业有限公司）	1998-11-12	2020-03-30	C	39	计算机、通信和其他电子设备制造业	广东省	广州市	番禺区	广州市番禺区石基镇雁洲村雁洲路	113.428	22.9315
273	广州市联合科技发展有限公司 （曾用名：广州市番禺联合科技发展有限公司）	1999-08-04	2021-06-30	M	75	科技推广和应用服务业	广东省	广州市	番禺区	广州市番禺区石楼镇南环路83号	113.493	22.9603
274	广州市番禺灵山造船厂有限公司	1998-06-30	2016-01-15	C	37	铁路、船舶、航空航天和其他运输设备制造业	广东省	广州市	南沙区	广州市南沙区大岗镇灵山第二工业开发区	113.43	22.8114
275	广东方纬科技有限公司 （曾用名：广州市方纬交通科技有限公司）	2003-02-11	2023-08-30	M	73	研究和试验发展	广东省	广州市	海珠区	广州市海珠区新港西路135号大院中大蒲园区628栋中大科技园楼A座自编号411B房（仅限办公用途使用）	113.298	23.0992
276	广东广纺检测技术股份有限公司 （曾用名：广州市纺织工业研究所）	1987-03-02	2023-03-24	M	74	专业技术服务业	广东省	广州市	黄埔区	广州市黄埔区科研路16号	113.449	23.1765
277	广州市风之帆光电科技有限公司	2004-11-08	2014-06-06	M	73	研究和试验发展	广东省	广州市	番禺区	广州市番禺区大龙街茶东村东兴路西三横路3号3座	113.418	22.9663
278	广州市高安电气电子工程有限公司	1998-09-21	2022-11-04	E	49	建筑安装业	广东省	广州市	南沙区	广州市南沙区芦湾东街57号101房401房	113.595	22.7949
279	广州市海林电子科技发展有限公司	2000-03-22	2023-10-23	C	39	计算机、通信和其他电子设备制造业	广东省	广州市	越秀区	广州市越秀区寺右新马路北一街三巷5号北侧首层（仅限办公）	113.315	23.1258
280	浩蓝环保股份有限公司 （曾用名：广州市浩蓝环保工程有限公司）	2000-10-09	2022-05-11	N	77	生态保护和环境治理业	广东省	广州市	黄埔区	广州市黄埔区（中新知识城）凤凰四路99号A栋619房	113.503	23.3921
281	广州市河东电子有限公司	1999-01-19	2017-04-10	C	39	计算机、通信和其他电子设备制造业	广东省	广州市	天河区	广州市天河区建中路22.24号首层	113.38	23.1336
282	广州市花都区莱合精密厂	1996-03-22	2014-05-21	C	41	其他制造业	广东省	广州市	花都区	广州市花都区新华街望亭路	113.192	23.3759
283	广州市华南农大生物药品有限公司	2004-12-08	2023-07-31	C	27	医药制造业	广东省	广州市	增城区	广州市增城增江街东区高科技工业基地	113.856	23.2755
284	广州市广智机电工业研究所有限公司 （曾用名：广州市机电工业研究所）	1981-07-27	2021-12-14	M	75	科技推广和应用服务业	广东省	广州市	黄埔区	广州市黄埔区科研路11号	113.448	23.1769
285	广州市建筑材料工业研究所有限公司	2003-10-31	2023-07-14	M	74	专业技术服务业	广东省	广州市	黄埔区	广州高新技术产业开发区科学城科研路2号	113.446	23.176
286	广州瑞立科密汽车电子股份有限公司 （曾用名：广州市科密汽车制动技术开发有限公司）	2001-12-29	2023-10-20	C	36	汽车制造业	广东省	广州市	黄埔区	广州经济技术开发区科学城南翔支路1号	113.458	23.1613
287	广州市科思通技术有限公司	1997-05-20	2013-04-25	M	73	研究和试验发展	广东省	广州市	天河区	广州市天河区广汕二路高科路46号701之02房	113.416	23.1904
288	广州市浪奇实业股份有限公司	1978-06-20	2023-08-07	C	26	化学原料和化学制品制造业	广东省	广州市	天河区	广州市天河区锦明街87-93号201室	113.375	23.1297
289	广州市利域科技信息咨询有限公司 （曾用名：广州市利域计算机有限公司）	2003-08-25	2021-11-17	M	75	科技推广和应用服务业	广东省	广州市	荔湾区	广州市荔湾区芳村大道东146号自编6栋309室（仅限办公）	113.227	23.1104
290	广州市美益香料有限公司	1998-11-04	2019-06-05	C	26	化学原料和化学制品制造业	广东省	广州市	黄埔区	广州经济技术开发区东区宏明路10号	113.553	23.1209
291	索菲亚家居股份有限公司 （曾用名：广州市宁基装饰实业股份有限公司）	2003-07-15	2023-07-13	C	21	家具制造业	广东省	广州市	增城区	广州市增城区永宁街郭村仙宁路2号	113.671	23.2202
292	广州市欧思卡电器制造有限公司	2005-12-09	2019-04-26	C	39	计算机、通信和其他电子设备制造业	广东省	广州市	南沙区	广州市南沙区市南公路1380号	113.429	22.8991
293	广州市瑞立德信息系统有限公司	2000-02-01	2023-08-04	I	65	软件和信息技术服务业	广东省	广州市	天河区	广州市天河区柯木塱杨梅岭街3号1栋601房（仅限办公）	113.419	23.19
294	广州大洋教育科技股份有限公司 （曾用名：广州市三星大洋计算机科技有限公司）	1998-04-24	2023-04-11	I	65	软件和信息技术服务业	广东省	广州市	天河区	广州市天河区天河北路908号2507房	113.351	23.1462
295	广州市广百物流有限公司 （曾用名：广州市商业储运公司）	1983-08-24	2023-02-17	G	58	多式联运和运输代理业	广东省	广州市	越秀区	广州市越秀区大沙头路33号401房	113.294	23.1195
296	广州市申迪计算机系统有限公司	1998-10-09	2022-12-06	I	65	软件和信息技术服务业	广东省	广州市	越秀区	广州市越秀区中山一路金羊一街2号1楼（不可作厂房使用）	113.316	23.1343
297	广州市圣大电子有限公司	2002-06-27	2016-09-12	C	39	计算机、通信和其他电子设备制造业	广东省	广州市	白云区	广州市白云区石井庆丰三区七号	113.233	23.2204
298	广州市泰禾创信计算机信息技术有限公司	2004-08-10	2021-12-28	I	65	软件和信息技术服务业	广东省	广州市	海珠区	广州市海珠区礼岗路10号之一4楼F07号（仅限办公）	113.284	23.0926
299	广州市天河区金棠表面工程技术有限公司	1992-08-04	2022-07-11	C	33	金属制品业	广东省	广州市	天河区	广州市天河区岑村樟木山工业区1号厂房	113.395	23.1616
300	广州市通信建设有限公司	1998-06-30	2011-09-13	I	63	电信、广播电视和卫星传输服务	广东省	广州市	越秀区	广州市越秀区越华路28号1号楼	113.277	23.1358
301	广州市拓璞电器发展有限公司	2000-12-28	2023-07-12	C	39	计算机、通信和其他电子设备制造业	广东省	广州市	花都区	广州市花都区花东镇北兴大道19号	113.333	23.443
302	广州市微高软件科技有限公司	2006-01-17	2022-10-24	M	73	研究和试验发展	广东省	广州市	天河区	广州市天河区软件路11号503室B区33号（仅限办公）	113.419	23.1773
303	广州市伟时信息系统技术有限公司	2001-11-30	2023-03-30	I	65	软件和信息技术服务业	广东省	广州市	海珠区	广州市海珠区新港西路135号大院园西区705号中大科技园B座自编号1903,1904室（仅限办公）	113.297	23.0994
304	广州新科利保防雷技术股份有限公司 （曾用名：广州市新科利保防雷技术有限公司）	1999-06-29	2022-10-28	M	73	研究和试验发展	广东省	广州市	天河区	广州市天河区中山大道西89号14层1439房	113.363	23.1409
305	广州市新中天科贸实业有限公司	2000-02-02	2020-12-07	F	51	批发业	广东省	广州市	越秀区	广州市越秀区小北路65号4ABC房	113.278	23.1384
306	广州市雅江光电设备有限公司	2003-09-29	2017-06-20	C	38	电气机械和器材制造业	广东省	广州市	花都区	广州市花都区花山镇华辉路18号	113.295	23.469
307	广州市易诚计算机科技有限公司	2003-05-23	2017-05-18	M	73	研究和试验发展	广东省	广州市	黄埔区	广州高新技术产业开发区科学城彩频路七号401I室	113.441	23.1694
308	易票联支付有限公司 （曾用名：广州市易票联电子商务有限公司）	1999-03-22	2020-04-03	J	69	其他金融业	广东省	广州市	海珠区	广州市海珠区广州大道南368号11楼A	113.336	23.2143
309	广州市溢信科技股份有限公司 （曾用名：广州市溢信科技有限公司）	2001-07-12	2022-03-10	I	65	软件和信息技术服务业	广东省	广州市	黄埔区	广州市高新技术产业开发区科学城科学大道182号创新大厦C3区401室	113.462	23.172
310	广州市银光电子工业有限公司	1984-08-16	2010-11-08	C	39	计算机、通信和其他电子设备制造业	广东省	广州市	天河区	广州市天河区东圃棠东村广棠路棠东七社工业区8号一幢	113.393	23.1348
311	广州市尤特新材料有限公司	2003-06-26	2022-04-25	C	32	有色金属冶炼和压延加工业	广东省	广州市	花都区	广州市花都区花山镇华侨科技工业园华辉路4号	113.292	23.4588
312	广州市宇联机电有限公司	1994-03-28	2023-01-04	D	44	电力、热力生产和供应业	广东省	广州市	海珠区	广州市海珠区福场路5号611房自编2（仅作办公功能使用）	113.268	23.112
313	广州市蕴力信息科技有限公司	2006-10-19	2017-02-21	I	65	软件和信息技术服务业	广东省	广州市	天河区	广州市天河区车陂祠堂大街2号全部（部位：316房）	113.406	23.1274
314	广东睿盟计算机科技有限公司 （曾用名：广州市睿盟计算机科技有限公司）	2002-09-14	2023-03-16	M	73	研究和试验发展	广东省	广州市	天河区	广州市天河区思成路35号1单元801-59室	113.428	23.1836
315	广州视声电子科技有限公司	2004-11-05	2020-07-02	C	39	计算机、通信和其他电子设备制造业	广东省	广州市	黄埔区	广州经济技术开发区蓝玉四街9号6号北702-704房	113.533	23.0642
316	广州泰成生化科技有限公司	2003-11-05	2023-10-07	M	73	研究和试验发展	广东省	广州市	番禺区	广州市番禺区石壁街石壁一村谢石公路76号之一16栋203	113.279	23.0069
317	广州唐隆饲料有限公司	2002-11-13	2020-04-16	C	13	农副食品加工业	广东省	广州市	番禺区	广州市番禺区新造镇白贤堂后岗厂房内	113.419	23.036
318	广州腾浩电子科技有限公司	2007-10-10	2017-09-06	I	65	软件和信息技术服务业	广东省	广州市	番禺区	广州市番禺区东环街番禺大道北555号天安总部中心16号楼601房	113.377	22.9859
319	广州天科生物科技有限公司	2005-07-05	2023-05-10	C	26	化学原料和化学制品制造业	广东省	广州市	花都区	广州市花都区花东镇湾弓塘居委会老虎头1号	113.309	23.419
320	广州天迈互动媒体科技有限公司	2007-05-31	2016-04-12	M	75	科技推广和应用服务业	广东省	广州市	越秀区	广州市越秀区华侨新村团结路6号	113.3	23.1448
321	广州天越电子科技有限公司	2004-03-08	2023-02-15	C	39	计算机、通信和其他电子设备制造业	广东省	广州市	黄埔区	广州高新技术产业开发区香山路3号401	113.444	23.1789
322	广州铜材厂有限公司	1979-12-07	2023-01-10	C	32	有色金属冶炼和压延加工业	广东省	广州市	从化区	广州市从化广东从化经济开发区高技术产业园龙洞路5号	113.512	23.4485
323	广州玩酷软件有限公司	2007-09-21	2017-11-07	I	65	软件和信息技术服务业	广东省	广州市	天河区	广州市天河区天河工业园建中路59号柏朗奴大厦602之B	113.378	23.1294
324	广州网文三维数字技术有限公司	2007-04-09	2020-08-17	M	73	研究和试验发展	广东省	广州市	天河区	广州市天河区高普路1023号1楼101室自编02房（仅限办公）	113.42	23.179
325	广州网游数码科技有限公司	2021-05-24	2022-07-14	I	64	互联网和相关服务	广东省	广州市	南沙区	广州市南沙区中景三街6号267房A09	113.547	22.8048
326	广州文冲船厂有限责任公司	1981-08-22	2021-12-15	C	37	铁路、船舶、航空航天和其他运输设备制造业	广东省	广州市	南沙区	广州市南沙区鸡抱沙北路10号（自编2号）（自编二十一栋）	113.648	22.7071
327	广州西目信息科技有限公司	2004-07-14	2017-05-02	I	65	软件和信息技术服务业	广东省	广州市	越秀区	广州市越秀区先烈中路102号北自编2202、2204、2206房	113.307	23.1473
328	广州欣智通讯技术有限公司	2002-07-22	2016-01-28	M	73	研究和试验发展	广东省	广州市	越秀区	广州市越秀区明月一路20号1607房（仅限办公用途）	113.319	23.1211
329	广州新绿环阻燃装饰材料有限公司	1999-11-03	2014-04-16	C	20	木材加工和木、竹、藤、棕、草制品业	广东省	广州市	番禺区	广州市番禺区大石街河村油咀坑	113.313	23.0535
330	广州阳光耐特电子有限公司	2000-10-01	2022-11-16	C	39	计算机、通信和其他电子设备制造业	广东省	广州市	越秀区	广州市越秀区环市东路418号21楼自编2101、2102房（仅限办公）	113.301	23.1407
331	广州依万达电子科技有限公司	2002-02-08	2020-09-07	M	74	专业技术服务业	广东省	广州市	越秀区	广州市越秀区寺右新马路168号5楼西南面B	113.32	23.1253
332	广州移讯网络科技有限公司	2004-11-04	2020-05-07	I	65	软件和信息技术服务业	广东省	广州市	天河区	广州市天河区林和东路121号三楼自编302（不可作厂房使用）	113.335	23.1494
333	广州宜诚数字医疗系统有限公司	2006-03-15	2021-01-26	M	73	研究和试验发展	广东省	广州市	黄埔区	广州高新技术产业开发区彩频路9号902C、902D	113.443	23.1684
334	广州易茂科技发展有限公司	2000-08-08	2018-06-13	M	73	研究和试验发展	广东省	广州市	天河区	广州市天河区黄埔大道西76号富力盈隆广场2901单元	113.333	23.1324
335	广州亿程交通信息有限公司	2003-11-06	2022-02-11	M	73	研究和试验发展	广东省	广州市	番禺区	广州市番禺区石碁镇亚运大道1003号3号楼604、605、606号	113.453	22.9457
336	广州银晃通讯设备有限公司	1998-10-30	2023-05-15	C	39	计算机、通信和其他电子设备制造业	广东省	广州市	天河区	广州市天河区天河路228号广晟大厦13层05房自编之一（自然层12层05房自编之一，本住所限写字楼功能）	113.332	23.1378
337	广州凯唯贸易股份有限公司 （曾用名：广州英格发电机有限公司）	2006-07-12	2018-12-26	F	51	批发业	广东省	广州市	花都区	广州市花都区雅瑶镇雅源南路1号	113.234	23.3548
338	广州永联钢结构有限公司	1994-11-28	2023-06-02	C	33	金属制品业	广东省	广州市	荔湾区	广州市荔湾区玉兰路3号612房	113.251	23.0613
339	广州永日电梯有限公司	1993-05-18	2021-10-20	C	34	通用设备制造业	广东省	广州市	花都区	广州市花都区花都沿江大道24号	113.13	23.3566
340	广州远程教育中心有限公司	2002-11-29	2022-11-30	P	83	教育	广东省	广州市	越秀区	广州市越秀区麓景西路41号广州市广播电视大学校区6号楼6－7层	113.282	23.152
341	广州粤鑫激光科技有限公司	2001-03-22	2023-10-26	M	74	专业技术服务业	广东省	广州市	天河区	广州市天河区五山路广州有色金属研究院内	113.369	23.1777
342	广州天源信息科技股份有限公司 （曾用名：广州正道软件有限公司）	2001-11-16	2021-05-26	M	73	研究和试验发展	广东省	广州市	天河区	广州市天河区高普路1023号201室、202室	113.42	23.179
343	广州智讯通信系统有限公司	1996-03-26	2020-12-07	C	39	计算机、通信和其他电子设备制造业	广东省	广州市	海珠区	广州市海珠区赤岗西路265号1号楼自编110室	113.33	23.0953
344	广州中车轨道交通装备股份有限公司	1978-05-15	2020-06-29	C	37	铁路、船舶、航空航天和其他运输设备制造业	广东省	广州市	海珠区	广州市海珠区南边路38号自编2号	113.269	23.0845
345	中船黄埔文冲船舶有限公司 （曾用名：广州中船黄埔造船有限公司）	1981-06-01	2022-09-23	C	37	铁路、船舶、航空航天和其他运输设备制造业	广东省	广州市	黄埔区	广州市黄埔区长洲街	113.427	23.0827
346	广州中船文冲船坞有限公司 （曾用名：广州中船远航船坞有限公司）	2005-11-24	2020-03-24	C	37	铁路、船舶、航空航天和其他运输设备制造业	广东省	广州市	南沙区	广州市南沙区启航路10号自编1号自编4栋（办公楼）（仅限办公）	113.67	22.6824
347	广州中大凯旋电子科技有限公司	2007-04-28	2022-01-24	M	73	研究和试验发展	广东省	广州市	番禺区	广州市番禺区小谷围街青蓝街26号202	113.393	23.0628
348	广州中海达卫星导航技术股份有限公司	2006-06-21	2023-07-26	C	40	仪器仪表制造业	广东省	广州市	番禺区	广州市番禺区东环街番禺大道北555号天安总部中心13号厂房101	113.38	22.987
349	广州中宇冷气科技发展有限公司	1997-01-16	2023-04-21	M	73	研究和试验发展	广东省	广州市	从化区	广州市从化鳌头镇棋杆岭南村古塘自然村“三夫田”地段	113.533	23.5749
350	中石化广州工程有限公司 （曾用名：广州中元石油化工工程有限公司）	1998-06-16	2023-07-11	M	74	专业技术服务业	广东省	广州市	天河区	广州市天河区体育西路191号A塔3301房（仅限办公用途）	113.327	23.1464
351	广州中运计算机软件有限公司	2002-05-20	2019-12-09	I	65	软件和信息技术服务业	广东省	广州市	荔湾区	广州市荔湾区花地大道中51号第五层8528房（仅限办公用途）	113.242	23.1012
352	广州华宇信息技术有限公司 （曾用名：广州紫光华宇信息技术有限公司）	2007-09-11	2023-03-30	M	73	研究和试验发展	广东省	广州市	海珠区	广州市海珠区阅江中路688号保利国际广场北塔15层	113.379	23.1094
353	广州紫江包装有限公司	2001-01-12	2019-08-19	C	29	橡胶和塑料制品业	广东省	广州市	黄埔区	广州市黄埔区耀南路36号	113.563	23.0948
354	广州荷力胜蜂窝材料股份有限公司 （曾用名：荷力胜（广州）蜂窝制品有限公司）	1995-09-14	2022-01-26	C	26	化学原料和化学制品制造业	广东省	广州市	黄埔区	广州经济技术开发区永和经济区新业路7号。	113.572	23.1933
355	华南理工大学建筑设计研究院	1984-10-01	2023-07-04	M	74	专业技术服务业	广东省	广州市	天河区	广州市天河区华南理工大学设计院楼内	113.355	23.1612
356	华南农业大学实验兽药厂	1987-07-01	2019-10-12	C	27	医药制造业	广东省	广州市	天河区	广州市天河区五山华南农大校内9号楼旁	113.361	23.164
357	建衡（广州）科技有限公司	2001-09-24	2021-02-26	C	39	计算机、通信和其他电子设备制造业	广东省	广州市	天河区	广州市天河区天河路621号1001房之C11房	113.347	23.1412
358	建滔（广州）电子材料制造有限公司 （曾用名：建滔（番禺南沙）石化有限公司）	2000-01-18	2022-04-24	C	26	化学原料和化学制品制造业	广东省	广州市	南沙区	广州市南沙区南沙街环市大道北9号（办公楼）（仅限办公）	113.591	22.7699
359	建盈（中国）安防设备有限公司（曾用名：建盈（广州番禺）塑料五金实业有限公司）	1990-05-21	2021-10-13	C	33	金属制品业	广东省	广州市	番禺区	广州市番禺区石楼镇砺江路188号	113.498	22.9904
360	广州奥鑫通讯设备有限公司	2002-08-29	2020-08-20	C	39	计算机、通信和其他电子设备制造业	广东省	广州市	从化区	广州市从化江埔街河东北路93号（净化车间）	113.611	23.5517
361	广州市时代新科技有限公司（曾用名：广州市时代财富科技有限公司）	2000-04-17	2023-04-12	M	73	研究和试验发展	广东省	广州市	天河区	广州市天河区黄埔大道中660号之一1622室（部位：A室）	113.357	23.1303
362	威莱（广州）日用品有限公司	2004-12-17	2023-05-18	C	26	化学原料和化学制品制造业	广东省	广州市	从化区	广州市从化区明珠工业区伟业路8号	113.548	23.6026
363	广州柏道计算机科技有限公司	2003-02-22	2017-07-05	M	73	研究和试验发展	广东省	广州市	天河区	广州市天河区建中路64，66号西606之一房（仅限办公用途）	113.371	23.1288
364	广州咏顺包装材料有限公司	2003-10-17	2016-12-28	C	22	造纸和纸制品业	广东省	广州市	花都区	广州市花都区新华镇经济技术开发区永福大道西	113.227	23.4112
365	广州瑞通激光科技有限公司	2007-07-05	2020-10-13	M	74	专业技术服务业	广东省	广州市	荔湾区	广州市荔湾区花地大道南路中南街海南工商贸易区B栋厂房北梯2-3楼	113.228	23.0579
366	广州市东信达计算机技术开发有限公司	1998-04-01	2023-08-21	I	65	软件和信息技术服务业	广东省	广州市	荔湾区	广州市荔湾区周门北路40号202-6房（仅限办公）	113.248	23.1371
367	广州代代星电子科技有限公司	2002-09-27	2019-10-31	M	73	研究和试验发展	广东省	广州市	番禺区	广州市番禺区沙湾镇沙坑村第二工业区内	113.364	22.9018
368	广州飒特红外科技有限公司	2008-07-30	2022-11-01	M	73	研究和试验发展	广东省	广州市	黄埔区	广州经济技术开发区东江大道10、12号生产大楼一、二楼	113.529	23.0538
369	广东爵仕泳池水疗设备有限公司	1999-10-20	2020-03-19	C	35	专用设备制造业	广东省	广州市	白云区	广东省广州市白云区太和镇谢家庄永和路1号	113.368	23.3111
370	广州市冠今电子科技有限公司	2008-09-24	2022-01-07	L	72	商务服务业	广东省	广州市	海珠区	广州市海珠区栖玥街2号、3号2216房自编01房（仅限办公）	113.285	23.1126
371	广州市聚英电器实业有限公司	2003-09-24	2022-09-21	C	38	电气机械和器材制造业	广东省	广州市	南沙区	广州市南沙区聚银街9号	113.531	22.8079
372	广东久量股份有限公司（曾用名：广东久量光电科技有限公司）	2002-11-18	2020-01-17	C	38	电气机械和器材制造业	广东省	广州市	白云区	广州市白云区广州民营科技园科园路12号	113.344	23.3056
373	广州新华时代电子科技有限公司	2008-03-26	2021-09-29	M	74	专业技术服务业	广东省	广州市	黄埔区	广州市黄埔区大沙地东256-258号自编811房	113.46	23.1119
374	广州联合冷热设备有限公司	1996-07-25	2016-03-02	C	34	通用设备制造业	广东省	广州市	黄埔区	广州经济技术开发区东区北片果园四路1号	113.521	23.1498
375	广州市华南畜牧设备有限公司	2008-01-23	2023-09-27	C	34	通用设备制造业	广东省	广州市	白云区	广州市白云区钟落潭镇广从九路789号	113.464	23.4092
376	广东昕恒智能制造科技有限公司（曾用名：中博制动系统（广州）有限公司）	1995-11-27	2021-08-30	M	75	科技推广和应用服务业	广东省	广州市	黄埔区	广州经济技术开发区永和经济区禾丰一街10号	113.575	23.226
377	广州华工邦元信息技术有限公司	2002-05-17	2021-09-18	M	73	研究和试验发展	广东省	广州市	天河区	广州市天河区五山路381号华南理工大学后勤综合楼3层B区	113.349	23.1537
378	广州亿动网络科技有限公司	2017-11-20	2023-02-27	M	75	科技推广和应用服务业	广东省	广州市	南沙区	广州市南沙区海滨路181号1402房C03	113.538	22.8019
379	广州同汇盛南站产业发展有限公司（曾用名：广东中钰科技有限公司）	2000-09-19	2023-08-24	M	73	研究和试验发展	广东省	广州市	番禺区	广州市番禺区石壁街兴宏一街3号	113.305	22.9678
380	广州欧科信息技术股份有限公司（曾用名：广州市欧科地理信息技术服务有限公司）	2002-10-16	2023-02-10	I	65	软件和信息技术服务业	广东省	广州市	黄埔区	广州市黄埔区科学大道162号创意大厦B3栋502房	113.458	23.1699
381	广州市雄兵汽车电器有限公司	2003-01-02	2023-10-30	C	36	汽车制造业	广东省	广州市	增城区	广州市增城区永宁街新和北路36号	113.639	23.1782
382	广州市浩洋电子股份有限公司（曾用名：广州市浩洋电子有限公司）	2005-03-17	2023-06-02	C	39	计算机、通信和其他电子设备制造业	广东省	广州市	番禺区	广州市番禺区石碁镇海涌路109号（厂房）	113.457	22.9583
383	广州莱泰制药有限公司	1992-07-09	2022-06-02	M	73	研究和试验发展	广东省	广州市	白云区	广州市白云区广从五路103号801室	113.374	23.3549
384	广州市路迅智能科技有限公司	2007-02-13	2019-07-16	M	73	研究和试验发展	广东省	广州市	天河区	广州市天河区龙口东路342-360号318房	113.348	23.148
385	广州仕瀚环保科技有限公司	2006-01-12	2017-12-28	C	35	专用设备制造业	广东省	广州市	黄埔区	广州市黄埔区天鹿南路224号	113.428	23.2107
386	广州市普东医疗设备股份有限公司（曾用名：广州市普东光电科技有限公司）	2004-09-12	2022-06-17	M	73	研究和试验发展	广东省	广州市	黄埔区	广州市黄埔区科学大道182号创新大厦C2栋603房	113.462	23.1723
387	广州巨元生化有限公司	2003-02-19	2021-09-06	M	73	研究和试验发展	广东省	广州市	黄埔区	广州市黄埔区崖鹰石路10号五楼	113.444	23.1835
388	广州市安途电器有限公司	2004-11-02	2022-04-22	C	38	电气机械和器材制造业	广东省	广州市	黄埔区	广州市黄埔区南湾西成中街33、35号（门口坦厂房）	113.515	23.0823
389	广州市聚星源科技有限公司	1999-03-19	2021-12-07	M	73	研究和试验发展	广东省	广州市	黄埔区	广州高新技术产业开发区科学城科汇四街1号601房	113.444	23.1734
390	广东赛百威信息科技有限公司	2007-11-08	2023-03-24	M	73	研究和试验发展	广东省	广州市	黄埔区	广州市黄埔区科学城科珠路203号1301、1302、1303房	113.443	23.1702
391	广州市嘉诚国际物流股份有限公司（曾用名：广州市嘉诚国际物流有限公司）	2000-10-24	2023-04-11	G	58	多式联运和运输代理业	广东省	广州市	番禺区	广州市番禺区南村镇万博二路79号2202室	113.356	23.0131
392	广州暨大美塑生物科技有限公司	2006-11-13	2021-05-27	M	73	研究和试验发展	广东省	广州市	黄埔区	广州国际生物岛螺旋四路7号标准产业单元二期第3栋第7层702单元	113.376	23.0666
393	广州市灵狐系统工程有限公司	1995-03-02	2022-08-29	I	65	软件和信息技术服务业	广东省	广州市	天河区	广州市天河区高唐路261号1001（仅限办公）	113.409	23.173
394	广州先旗电子科技有限公司	1999-12-01	2019-12-18	M	73	研究和试验发展	广东省	广州市	黄埔区	广州市黄埔区（广州高新技术产业开发区）科学城科学大道33号自编五栋701之701.703.705.707.702.706.708房（仅限办公）	113.432	23.1725
395	广州一道注塑机械股份有限公司（曾用名：广州一道注塑机械有限公司）	2005-11-07	2023-03-17	C	35	专用设备制造业	广东省	广州市	黄埔区	广州市高新技术产业开发区神舟路19号自编1栋三楼	113.439	23.1795
396	广州林达照明工业有限公司	2006-03-27	2013-07-18	C	38	电气机械和器材制造业	广东省	广州市	白云区	广州市白云区人和镇人江路段大巷村第二经济合作社工业园1号厂房	113.294	23.3305
397	广州市德山通信设备有限公司	2002-02-01	2021-10-09	F	51	批发业	广东省	广州市	黄埔区	广州市经济技术开发区科学城彩频路11号B-701单元	113.443	23.1679
398	康亦健（集团）有限公司（曾用名：广州市康亦健医疗设备有限公司）	2002-12-05	2023-10-10	C	35	专用设备制造业	广东省	广州市	南沙区	广州市南沙区榄核镇蔡新路282号（厂房D栋、厂房H栋、自编1栋办公楼）	113.337	22.8375
399	广州希胜科技有限公司	2003-04-17	2023-03-29	I	65	软件和信息技术服务业	广东省	广州市	天河区	广州市天河区华观路1963号1栋411房（仅限办公，不可作厂房使用）	113.419	23.1735
400	广州明珞装备股份有限公司（曾用名：广州明珞汽车装备有限公司）	2008-06-06	2022-06-16	C	35	专用设备制造业	广东省	广州市	黄埔区	广州市黄埔区开源大道11号C3栋101室、201室	113.502	23.1594
401	广州国保科技有限公司	1999-09-13	2020-09-24	M	73	研究和试验发展	广东省	广州市	天河区	广州市天河区柯木塱南路5号101-201房	113.411	23.1967
402	广上科技（广州）股份有限公司（曾用名：广上科技（广州）有限公司）	1998-04-23	2023-09-15	C	39	计算机、通信和其他电子设备制造业	广东省	广州市	黄埔区	广州保税区保盈南路19号。	113.538	23.0795
403	广州市图之灵计算机技术有限公司	1999-06-01	2023-03-31	I	65	软件和信息技术服务业	广东省	广州市	海珠区	广州市海珠区南洲路365号二层216号铺自编216房（仅限办公）	113.31	23.0708
404	广州飞卓科汇信息科技有限公司	2000-08-29	2023-10-26	I	65	软件和信息技术服务业	广东省	广州市	越秀区	广州市越秀区德政北路538号4楼南向403房	113.281	23.1381
405	广州多浦乐电子科技股份有限公司（曾用名：广州多浦乐电子科技有限公司）	2008-01-10	2023-10-13	C	40	仪器仪表制造业	广东省	广州市	黄埔区	广州经济技术开发区开创大道1501号2栋一楼	113.528	23.1642
406	广州华穗信息科技股份有限公司（曾用名：广州华穗信息科技有限公司）	2004-08-16	2022-05-07	I	65	软件和信息技术服务业	广东省	广州市	天河区	广州市天河区棠下荷光三横路7号403房	113.374	23.1261
407	广州翼风信息科技股份有限公司（曾用名：广州翼风通信技术有限公司）	2004-04-01	2022-06-21	M	73	研究和试验发展	广东省	广州市	天河区	广州市天河区华夏路49号之一2407房	113.327	23.1321
408	广州海瑞克隧道机械有限公司	2003-07-21	2023-06-25	C	43	金属制品、机械和设备修理业	广东省	广州市	南沙区	广州市南沙区黄阁工业园广盾路3号	113.537	22.8354
409	广东瑞克斯智能科技有限公司（曾用名：广州市瑞翔机电有限公司）	2003-07-22	2019-01-29	C	33	金属制品业	广东省	广州市	南沙区	广州市南沙区细沥村工业一路6号	113.57	22.7551
410	广州网家信息技术有限公司	2006-11-13	2019-12-20	I	65	软件和信息技术服务业	广东省	广州市	越秀区	广州市越秀区先烈中路102号北自编1602、04、06房（仅限办公使用）	113.307	23.1473
411	广州市极动焊接机械有限公司	2004-03-29	2019-02-20	C	34	通用设备制造业	广东省	广州市	花都区	广州市花都区秀全街花港大道73号	113.163	23.3752
412	广州掌动智能科技有限公司（曾用名：广州掌动通信有限公司）	2006-10-31	2022-10-10	M	73	研究和试验发展	广东省	广州市	天河区	广州市天河区中山大道西6、8号第14层自编02-05、06B房（不可作厂房）	113.373	23.1403
413	广州市宁志电力科技有限公司	2006-05-23	2021-10-19	M	73	研究和试验发展	广东省	广州市	番禺区	广州市番禺区番禺大道北555号天安节能科技园创新大厦821号	113.373	22.9848
414	广州粤昆源生物科技发展有限公司	2006-12-01	2022-09-27	M	75	科技推广和应用服务业	广东省	广州市	海珠区	广州市海珠区新港西路105号自编36栋2楼204房(仅作写字楼功能用，不可作厂房使用)	113.3	23.0986
415	广州市红鹏直升机遥感科技有限公司	2002-11-22	2023-10-19	G	56	航空运输业	广东省	广州市	黄埔区	广州高新技术产业开发区科学城开源大道11号B7栋第六层	113.502	23.1594
416	广州豪进摩托车股份有限公司	2001-04-26	2020-03-18	C	37	铁路、船舶、航空航天和其他运输设备制造业	广东省	广州市	增城区	广州市增城新塘镇荔新公路上邵工业区[土名：增城市新塘镇上邵村第四社企岗（厂房A2）]	113.644	23.1626
417	奥特朗电器（广州）有限公司	2006-05-17	2016-11-14	C	38	电气机械和器材制造业	广东省	广州市	黄埔区	广州高新技术产业开发区科学城南翔一路68号厂房三	113.449	23.1767
418	波达通信设备（广州）有限公司	2004-01-02	2021-12-08	C	39	计算机、通信和其他电子设备制造业	广东省	广州市	黄埔区	广州市黄埔区滨河路9号1501室1601室2301室	113.528	23.073
419	东方电气（广州）重型机器有限公司	2003-09-02	2023-07-26	C	34	通用设备制造业	广东省	广州市	南沙区	广州市南沙区黄阁镇连溪大道313号	113.539	22.8331
420	敦扬（广州）汽车电子有限公司	2006-07-10	2021-04-16	C	36	汽车制造业	广东省	广州市	黄埔区	广州高新技术产业开发区科学城光宝科技园光谱西路25号B栋1、3、4楼	113.433	23.1657
421	广东标美硅氟新材料有限公司	1993-07-19	2017-09-05	C	26	化学原料和化学制品制造业	广东省	广州市	增城区	广州市增城新塘镇永和山江南路15号	113.599	23.1817
422	广东创宇信息工程有限公司	2000-04-11	2021-09-27	E	49	建筑安装业	广东省	广州市	天河区	广州市天河区中山大道西89号914房（仅限办公）	113.363	23.1409
423	广东电信建设开发有限公司	1994-08-05	2011-09-13	M	74	专业技术服务业	广东省	广州市	越秀区	广州市越秀区建设五马路1号德安大厦2楼	113.291	23.1398
424	广东广兴牧业机械设备有限公司（曾用名：广东广兴牧业机械设备公司）	1994-04-06	2021-07-06	C	35	专用设备制造业	广东省	广州市	天河区	广东省广州市天河区石牌五山路261号大院自编31号楼	113.373	23.1403
425	广东宏大控股集团股份有限公司（曾用名：广东宏大爆破股份有限公司）	1988-05-14	2023-04-21	J	69	其他金融业	广东省	广州市	天河区	广州市天河区珠江新城华夏路49号之二津滨腾越大厦北塔21层	113.327	23.132
426	广东连欣科技有限公司（曾用名：广东连连科技有限公司）	2005-09-07	2022-01-27	M	73	研究和试验发展	广东省	广州市	越秀区	广州市越秀区沿江中路298号B栋712房	113.285	23.1212
427	广东三向教学仪器制造有限公司	1999-08-03	2019-09-01	C	40	仪器仪表制造业	广东省	广州市	白云区	广州市白云区人和镇东华村西二工业区	113.303	23.3514
428	广东先强药业有限公司	2002-09-23	2023-01-17	C	27	医药制造业	广东省	广州市	从化区	广州市从化经济开发区工业大道6号	113.503	23.4512
429	广东中鑫华科技有限公司	2004-10-22	2020-06-18	I	65	软件和信息技术服务业	广东省	广州市	天河区	广州市天河区龙口东路342-360号天诚广场第三层305A房	113.347	23.148
430	广州柏胜体育发展有限公司（曾用名：广州柏胜健体设施发展有限公司）	2000-03-22	2020-02-25	M	73	研究和试验发展	广东省	广州市	黄埔区	广州市黄埔区彩频路9号702-1房	113.443	23.1684
431	广州博纳信息技术有限公司	2008-08-29	2021-06-23	I	65	软件和信息技术服务业	广东省	广州市	越秀区	广州市越秀区东风东路745号1802、1803房（仅限办公用途）	113.311	23.1382
432	广州畅阳电子科技有限公司	2008-07-07	2020-06-04	C	39	计算机、通信和其他电子设备制造业	广东省	广州市	黄埔区	广州高新技术产业开发区光谱西路3号研发厂房503房	113.425	23.1645
433	广州大华科盛科技有限公司（曾用名：广州大华德盛科技有限公司）	2006-10-30	2021-08-24	M	74	专业技术服务业	广东省	广州市	白云区	广州市白云区科盛路1、3、5号自编4栋1701房（仅限办公功能用）	113.342	23.3086
434	广东戴卡旭汽车零部件有限公司（曾用名：广州戴卡旭铝铸件有限公司）	2003-06-26	2023-05-11	C	36	汽车制造业	广东省	清远市	英德市	广东省英德市英红镇广清经济特别合作区广德（英德）产业园中南产业片区西横六路8号	113.411	24.3058
435	广州德达泰尔通信有限公司	2001-10-18	2022-07-27	M	73	研究和试验发展	广东省	广州市	海珠区	广州市海珠区新港东路海诚西街7号501房	113.363	23.1044
436	广州都盛机电有限公司	2002-04-15	2021-08-31	C	39	计算机、通信和其他电子设备制造业	广东省	广州市	黄埔区	广州市黄埔区宏明路271号A402房	113.546	23.117
437	广州多益尚计算机技术有限公司	2002-02-05	2019-12-13	M	73	研究和试验发展	广东省	广州市	天河区	广州市天河区华景路71号302室之B40房	113.365	23.1446
438	广州菲音信息科技有限公司	2004-04-12	2023-03-09	I	65	软件和信息技术服务业	广东省	广州市	天河区	广州市天河区高普路1021号5楼6406号	113.419	23.1792
439	广州枫叶管业有限公司	2004-12-23	2019-06-05	C	29	橡胶和塑料制品业	广东省	广州市	花都区	广州市花都区花都大道中213号	113.421	23.4335
440	广州高大科技发展股份有限公司（曾用名：广州高大科技发展有限公司）	1998-07-01	2021-06-18	C	38	电气机械和器材制造业	广东省	广州市	黄埔区	广州高新技术产业开发区科学城南云二路8号研发大楼三楼	113.451	23.1571
441	广电计量检测集团股份有限公司（曾用名：广州广电计量测试技术有限公司）	2002-05-24	2023-02-24	M	74	专业技术服务业	广东省	广州市	番禺区	广州市番禺区石碁镇岐山路8号150	113.446	22.9577
442	广州白云山汉方现代药业有限公司（曾用名：广州汉方现代中药研究开发有限公司）	1998-09-24	2023-10-31	C	27	医药制造业	广东省	广州市	从化区	广州市从化温泉大道8号	113.628	23.5971
443	广州瀚诚电子产品有限公司	2008-03-20	2016-06-28	M	73	研究和试验发展	广东省	广州市	海珠区	广州市海珠区新港西路231号欣海楼1栋2A5(仅作写字楼功能用）	113.318	23.1019
444	广州和创塑化有限公司	2005-01-25	2022-12-07	C	29	橡胶和塑料制品业	广东省	广州市	南沙区	广州南沙区西部工业区广意路旁	113.557	22.776
445	广州恒汇网络通信有限公司	2005-04-01	2019-09-06	I	63	电信、广播电视和卫星传输服务	广东省	广州市	越秀区	广州市越秀区中山三路33号10楼B座（10楼B部分）自编F46	113.289	23.1317
446	广州鸿琪光学仪器科技有限公司	2005-05-08	2023-03-14	M	73	研究和试验发展	广东省	广州市	黄埔区	广州高新技术产业开发区科学城开源大道11号A6栋第三层	113.442	23.166
447	广州鸿森材料有限公司	2002-09-28	2016-09-26	C	26	化学原料和化学制品制造业	广东省	广州市	黄埔区	广州保税区保江路200号	113.549	23.0727
448	广州华德汽车弹簧有限公司	1993-12-27	2023-10-27	C	36	汽车制造业	广东省	广州市	增城区	广州市增城区永宁街创业大道158号	113.666	23.1955
449	广州华多网络科技有限公司	2005-04-11	2022-04-08	M	73	研究和试验发展	广东省	广州市	番禺区	广州市番禺区南村镇万博二路79号万博商务区万达商业广场北区B-1栋24层（仅限办公用途）	113.356	23.0127
450	广东阳普智慧医疗信息科技有限公司（曾用名：广州惠侨计算机科技有限公司）	2000-04-05	2023-06-09	M	73	研究和试验发展	广东省	广州市	黄埔区	广州市黄埔区科学城开源大道102号620房	113.523	23.166
451	建峰索具有限公司（曾用名：广州建峰特纺五金制造有限公司）	2004-01-19	2023-08-24	C	17	纺织业	广东省	广州市	黄埔区	广州经济技术开发区永和区贤堂路18号	113.538	23.2137
452	广州金抡电器有限公司	2005-03-21	2022-12-08	C	38	电气机械和器材制造业	广东省	广州市	花都区	广州市花都区花东镇启东路4号101（可作厂房使用）	113.366	23.442
453	广州精一钢业有限公司	2003-06-16	2023-10-07	C	31	黑色金属冶炼和压延加工业	广东省	广州市	天河区	广州市天河区五山路广东省钢铁研究所内	113.363	23.1657
454	广州凯恒特种电线电缆有限公司	1997-08-21	2021-09-07	M	73	研究和试验发展	广东省	广州市	黄埔区	广州市经济技术开发区广汕路长安148号凯恒科技园	113.459	23.1974
455	广州科化新材料技术有限公司（曾用名：广州科化防水防腐补强有限公司）	2004-12-24	2018-09-04	M	73	研究和试验发展	广东省	广州市	天河区	广州市天河区荔苑路18号AB栋A栋F3007	113.418	23.1329
456	广州朗圣药业有限公司	2003-08-05	2023-08-31	C	27	医药制造业	广东省	广州市	黄埔区	广州高新技术产业开发区科学城金峰园路3号	113.455	23.186
457	广州立邦涂料有限公司	2001-12-27	2023-05-25	C	26	化学原料和化学制品制造业	广东省	广州市	黄埔区	广州经济技术开发区风华二路1号	113.517	23.145
458	广州名龙电脑设备有限公司	2004-08-24	2013-02-01	C	39	计算机、通信和其他电子设备制造业	广东省	广州市	白云区	广州市白云区人和镇东华工业区华业路5号	113.294	23.3411
459	广州龙沙制药有限公司（曾用名：广州南沙龙沙有限公司）	2003-04-16	2023-06-16	C	26	化学原料和化学制品制造业	广东省	广州市	南沙区	广州市南沙区庆盛大道1号C1栋127号	113.531	22.8079
460	广州白云山生物制品股份有限公司（曾用名：广州诺诚生物制品股份有限公司）	2006-04-20	2023-10-20	C	27	医药制造业	广东省	广州市	黄埔区	广州市经济技术开发区连云路406号	113.512	23.146
461	广州诺金制药有限公司	2003-07-03	2023-04-21	C	27	医药制造业	广东省	广州市	黄埔区	广州经济技术开发区永和经济区田园西路37号	113.551	23.2019
462	广州赛宝联睿信息科技有限公司	2003-11-25	2023-08-03	M	74	专业技术服务业	广东省	广州市	天河区	广州市天河区天慧路46号A栋二、三楼（仅限办公）	113.429	23.1885
463	广州市百圣牛实业有限公司	2000-02-24	2023-08-04	C	40	仪器仪表制造业	广东省	广州市	白云区	广州市白云区江高镇江石东路17号A栋	113.227	23.2895
464	广州市贝佳软件开发有限公司	2000-04-11	2023-03-28	I	65	软件和信息技术服务业	广东省	广州市	黄埔区	广州高新技术产业开发区科学城科珠路201号G422、424、426	113.443	23.1698
465	广州市彩讯计算机科技有限公司	2002-11-25	2022-06-10	I	65	软件和信息技术服务业	广东省	广州市	天河区	广州市天河区棠东毓南路15号G408室	113.394	23.133
466	广州市阿斯特姆电子有限公司（曾用名：广州市第吉尔电子有限公司）	2002-07-16	2017-09-19	C	39	计算机、通信和其他电子设备制造业	广东省	广州市	荔湾区	广州市荔湾区花湾路613号坑口沙涌工业区C幢D座首层之一	113.246	23.0892
467	广州市盾建建设有限公司（曾用名：广州市盾建地下工程有限公司）	1999-10-06	2023-06-29	E	48	土木工程建筑业	广东省	广州市	番禺区	广州市番禺区南村镇汇智三路25号1301房	113.352	23.0119
468	广州市番禺明珠电器有限责任公司	1997-11-07	2013-05-28	C	38	电气机械和器材制造业	广东省	广州市	番禺区	广州市番禺区市桥东环路１１８号	113.39	22.9438
469	广州市佛达信号设备有限公司	2007-09-11	2023-03-21	C	36	汽车制造业	广东省	广州市	花都区	广州市花都区汽车城东风大道西	113.137	23.3636
470	广州市佳境水处理技术工程有限公司	1999-12-13	2023-07-28	E	49	建筑安装业	广东省	广州市	黄埔区	广州市黄埔区东源路18号601室	113.506	23.132
471	广州佳时达软件股份有限公司（曾用名：广州市佳时达软件有限公司）	2002-11-07	2023-10-20	M	73	研究和试验发展	广东省	广州市	天河区	广州市天河区华穗路406号之二1305房	113.326	23.1329
472	广州市晶华精密光学股份有限公司（曾用名：广州市晶华光学电子有限公司）	1997-02-05	2023-09-22	C	39	计算机、通信和其他电子设备制造业	广东省	广州市	黄埔区	广州市黄埔区云埔工业区东诚片康达路12号	113.547	23.1316
473	广州麦科凌电力装备有限公司（曾用名：广州市迈克林电力有限公司）	2003-10-30	2023-07-07	C	38	电气机械和器材制造业	广东省	广州市	从化区	广州从化区太平镇平中路339号	113.508	23.4292
474	广州普邦园林股份有限公司（曾用名：广州市普邦园林配套工程有限公司）	1995-07-19	2022-07-28	M	73	研究和试验发展	广东省	广州市	越秀区	广州市越秀区寺右新马路南二街一巷14－20号首层	113.315	23.1258
475	广州市锐博生物科技有限公司	2004-07-07	2023-03-16	M	73	研究和试验发展	广东省	广州市	黄埔区	广州市黄埔区隧达街7号	113.545	23.1788
476	广州市三川田文化科技股份有限公司（曾用名：广州市三川田数码科技有限公司）	2004-04-12	2021-02-05	I	65	软件和信息技术服务业	广东省	广州市	黄埔区	广州市黄埔区科学城科汇四街5号301-B号	113.443	23.1736
477	广州美景文旅发展有限公司（曾用名：广州市双诚信息技术有限公司）	2003-12-29	2023-05-26	N	78	公共设施管理业	广东省	广州市	天河区	广州市天河区黄埔大道西638号1706房（仅限办公用途）	113.357	23.1303
478	广州市泰富信通科技有限公司	2003-03-04	2023-03-16	I	65	软件和信息技术服务业	广东省	广州市	天河区	广州市天河区林和西路167号2941房、2942房	113.329	23.1569
479	广州市万鸿计算机科技有限公司	2005-09-19	2018-12-29	I	65	软件和信息技术服务业	广东省	广州市	天河区	广州市天河区天河北路892号14楼自编1409房（仅限办公用途）	113.351	23.1471
480	广州万企智能科技有限公司（曾用名：广州市万企网络信息有限公司）	2004-08-20	2023-04-21	M	73	研究和试验发展	广东省	广州市	增城区	广州市增城区荔湖街增城大道441号3楼305房	113.788	23.2869
481	广州市型腔模具制造有限公司	2004-03-31	2023-06-07	C	35	专用设备制造业	广东省	广州市	花都区	广州市花都区沿江大道19号1楼105室	113.143	23.3547
482	广州市御航信息技术有限公司	2007-03-29	2020-06-10	I	65	软件和信息技术服务业	广东省	广州市	天河区	广州市天河区五山路246、248、250号2402-04室、2402-05室、2402-10室（仅限办公）	113.353	23.1495
483	广州天赐有机硅科技有限公司	2002-07-01	2022-03-09	C	26	化学原料和化学制品制造业	广东省	广州市	黄埔区	广州市黄埔区云埔工业区东诚片	113.487	23.1875
484	广州唯品会信息科技有限公司	2008-08-22	2023-11-03	I	65	软件和信息技术服务业	广东省	广州市	荔湾区	广州市荔湾区芳村花海街20号自编1-5号楼（仅作写字楼功能使用）	113.237	23.1061
485	广州唯思软件股份有限公司	2004-09-02	2023-06-29	M	73	研究和试验发展	广东省	广州市	黄埔区	广州市黄埔区富康西街10号534房	113.441	23.1623
486	广州维动网络科技有限公司	2007-01-22	2023-03-09	M	73	研究和试验发展	广东省	广州市	天河区	广州市天河区高普路1021号5楼6400号	113.419	23.1792
487	广州欣纬智慧安全科技有限公司（曾用名：广州欣纬软件技术有限公司）	2004-04-26	2023-09-18	M	73	研究和试验发展	广东省	广州市	海珠区	广州市海珠区新港西路135号大院园西区705号楼中大科技园B座自编号912,913,914,915室（仅限办公）	113.297	23.0994
488	广州兴森快捷电路科技有限公司	2006-09-07	2022-09-21	C	39	计算机、通信和其他电子设备制造业	广东省	广州市	黄埔区	广州高新技术产业开发区科学城光谱中路33号	113.47	23.163
489	广州怡禄电讯科技有限公司	2002-01-26	2023-05-25	I	65	软件和信息技术服务业	广东省	广州市	天河区	广州市天河区黄村大道2号后座601房	113.414	23.1301
490	广州优创电子有限公司	2005-03-22	2023-06-01	C	39	计算机、通信和其他电子设备制造业	广东省	广州市	番禺区	广州市番禺区大龙街长沙路15号	113.434	22.9549
491	广州游国信息技术有限公司	2021-03-04	2022-07-22	I	65	软件和信息技术服务业	广东省	广州市	南沙区	广州市南沙区丰泽东路106号（自编1号楼）X1301-E012342	113.538	22.7953
492	广州市元建建材有限公司（曾用名：广州元建特种材料科技开发有限公司）	2004-10-08	2020-07-17	F	51	批发业	广东省	广州市	增城区	广州市增城增江街西山村霞余（即增城东区高科技工业基地）	113.851	23.2928
493	广州粤有研矿物资源科技有限公司	2008-06-11	2020-12-23	M	75	科技推广和应用服务业	广东省	广州市	天河区	广州市天河区长兴路363号广州有色金属研究院内第6宗地自编7号	113.369	23.1736
494	广东越维信息科技有限公司（曾用名：广州越维信息科技有限公司）	2004-07-15	2023-05-31	I	65	软件和信息技术服务业	广东省	广州市	天河区	广州市天河区东圃车陂路黄洲工业区大院内自编8号第7层713房	113.395	23.127
495	广州中爆安全网科技有限公司	2003-12-03	2023-03-16	M	74	专业技术服务业	广东省	广州市	天河区	广州市天河区上元岗中成路300号528房（本住所限写字楼功能）	113.349	23.1924
496	瑞仪（广州）光电子器件有限公司	2007-08-08	2020-05-14	C	39	计算机、通信和其他电子设备制造业	广东省	广州市	黄埔区	广州市高新技术产业开发区科学城新瑞路11号	113.493	23.1635
497	广州易宝爱普讯电信科技有限公司	1997-02-24	2023-04-10	M	73	研究和试验发展	广东省	广州市	番禺区	广州市番禺区市桥街捷进二路11号112	113.365	22.9556
498	广州北斗导航技术有限公司（曾用名：广州北斗大三通导航科技有限公司）	2005-12-19	2019-10-24	M	73	研究和试验发展	广东省	广州市	黄埔区	广州市萝岗区科学大道中科汇二街4号101房	113.457	23.1713
499	广州女娲肥业有限公司	2004-03-08	2015-10-28	F	51	批发业	广东省	广州市	番禺区	广州市番禺区小谷围街外环东路280号广东药学院院系一号楼509室	113.418	23.062
500	广州好莱客创意家居股份有限公司（曾用名：广州好莱客家具有限公司）	2007-04-09	2023-10-31	C	21	家具制造业	广东省	广州市	黄埔区	广州经济技术开发区东区连云路8号	113.538	23.1325
501	广州商景网络科技有限公司	1999-10-21	2023-11-08	M	74	专业技术服务业	广东省	广州市	天河区	广州市天河区中山大道路89号7层北10A-11号	113.369	23.1304
502	广州双鱼体育用品集团有限公司	1998-02-26	2023-11-01	R	89	体育	广东省	广州市	海珠区	广州市海珠区燕子岗路18号之二	113.284	23.0831
503	广州广日专用汽车有限公司	2004-12-06	2023-08-02	C	36	汽车制造业	广东省	广州市	黄埔区	广州市黄埔区东鹏大道59号	113.533	23.1289
504	广东省福美材料科学技术有限公司（曾用名：广州福美软瓷有限公司）	2008-01-03	2022-06-09	M	73	研究和试验发展	广东省	广州市	黄埔区	广州市黄埔区科学城南云二路62号A栋202房	113.453	23.1523
505	广州市前锋水上运动器材用品有限公司	1990-11-09	2022-02-16	C	24	文教、工美、体育和娱乐用品制造业	广东省	广州市	海珠区	广州市海珠区石岗路侯王庙街9-15号首层	113.283	23.0747
506	东科延锋（广州）座椅系统有限公司（曾用名：广州东风江森座椅有限公司）	2005-01-06	2023-05-08	C	36	汽车制造业	广东省	广州市	花都区	广州市花都区秀全街金钟大道1号	113.17	23.4418
507	广州市赛乐通信科技有限公司	2001-09-06	2017-08-16	M	73	研究和试验发展	广东省	广州市	黄埔区	广州经济技术开发区开发大道225号、锦绣路46号第九层	113.796	23.2644
508	广州汉源新材料股份有限公司（曾用名：广州瀚源电子科技有限公司）	2004-11-26	2023-07-12	C	26	化学原料和化学制品制造业	广东省	广州市	黄埔区	广州高新技术产业开发区科学城南云二路58号	113.453	23.1528
509	广州极盛信息科技开发有限公司	2006-05-13	2023-09-08	M	73	研究和试验发展	广东省	广州市	海珠区	广州市海珠区石岗路27号604房（仅限办公）	113.28	23.072
510	广州市广石物流有限公司	1992-10-29	2022-03-28	G	58	多式联运和运输代理业	广东省	广州市	黄埔区	广州市黄埔区石化路239号(石化厂内)	113.477	23.1138
511	广州银禾网络通信有限公司	2004-04-30	2020-08-10	M	73	研究和试验发展	广东省	广州市	天河区	广州市天河区五山路246、248、250号2202自编02、03房（仅限办公）（不可作厂房使用）	113.353	23.1495
512	广州酷狗计算机科技有限公司	2006-02-20	2023-03-20	I	65	软件和信息技术服务业	广东省	广州市	天河区	广州市天河区黄埔大道中315号自编1-17	113.373	23.1403
513	广东国地规划科技股份有限公司（曾用名：广东国地规划科技有限公司）	2005-06-03	2021-07-20	I	65	软件和信息技术服务业	广东省	广州市	天河区	广东省广州市天河区长福路219号H1房	113.355	23.172
514	广州信邦智能装备股份有限公司（曾用名：广州信邦汽车装备制造有限公司）	2005-07-18	2022-08-05	C	34	通用设备制造业	广东省	广州市	花都区	广州市花都区汽车城车城大道北侧	113.146	23.3712
515	依利安达（广州）显示器有限公司	1995-11-23	2022-03-15	C	39	计算机、通信和其他电子设备制造业	广东省	广州市	黄埔区	广州经济技术开发区东区宏明路4号	113.556	23.1228
516	广东暨大基因药物工程研究中心有限公司	2006-08-02	2023-03-29	M	75	科技推广和应用服务业	广东省	广州市	黄埔区	广州市经济技术开发区科学城开源大道206号	113.524	23.1666
517	广州友智电气技术有限公司	2006-10-31	2021-04-15	M	73	研究和试验发展	广东省	广州市	海珠区	广州市海珠区新港西路3号十五层（部位：自编1501）（仅限办公）	113.29	23.1023
518	广州佳都技术有限公司（曾用名：广州新太技术有限公司）	2006-10-31	2023-11-06	I	65	软件和信息技术服务业	广东省	广州市	黄埔区	广州市黄埔区开泰大道30号之一1705房	113.48	23.1688
519	广州金微软件技术有限公司	2006-10-25	2016-09-29	M	73	研究和试验发展	广东省	广州市	黄埔区	广州高新技术产业开发区神舟路9号306室	113.438	23.1753
520	广州弘亚数控机械股份有限公司（曾用名：广州弘亚机械有限公司）	2006-11-17	2023-06-15	C	34	通用设备制造业	广东省	广州市	黄埔区	广州市黄埔区云埔工业区云开路3号	113.537	23.1602
521	广东德洛斯照明工业有限公司	2005-02-23	2022-08-11	C	38	电气机械和器材制造业	广东省	广州市	天河区	广州市天河区建中路64－66号东205	113.379	23.1287
522	广州信禾检测设备有限公司（曾用名：广州信禾电子设备有限公司）	2003-07-04	2022-09-26	C	39	计算机、通信和其他电子设备制造业	广东省	广州市	番禺区	广州市番禺区大石街石中三路9号3栋102	113.285	23.0154
523	丽华（广州）香精香料股份有限公司（曾用名：丽华（广州）香精有限公司）	2004-09-30	2023-08-07	C	26	化学原料和化学制品制造业	广东省	广州市	白云区	广州市白云区北太路1633号广州民营科技园科兴路19号	113.341	23.3015
524	广东斯泰克电子科技有限公司	2008-12-05	2023-10-18	C	39	计算机、通信和其他电子设备制造业	广东省	广州市	南沙区	广州市南沙区东涌镇骏马大道19号斯泰克科创中心4#智能厂房12层1201	113.445	22.8471
525	广州能迪能源科技股份有限公司（曾用名：广州市能迪自动化设备有限公司）	2002-10-28	2023-08-18	M	73	研究和试验发展	广东省	广州市	海珠区	广州市海珠区南洲路92号东南门主厂房自编3号楼自编110房	113.33	23.0628
526	广州亿盛电气科技有限公司	2005-03-07	2020-12-11	C	38	电气机械和器材制造业	广东省	广州市	南沙区	广州市南沙区大岗镇牛角岭东街22号（自编1号）	113.41	22.8205
527	广州短讯神州网络技术有限公司	2006-04-12	2019-12-12	I	65	软件和信息技术服务业	广东省	广州市	海珠区	广州市海珠区琶洲大道东8号603房自编09房-901（仅限办公）	113.378	23.106
528	金刚幕墙集团有限公司珠海分公司（曾用名：广东金刚幕墙工程有限公司）	2013-03-29	2022-01-11	E	47	房屋建筑业	广东省	珠海市	斗门区	珠海市斗门区城南华丰一区38号301-302室	113.361	22.1514
529	广州市天河诺亚生物工程有限公司	1997-06-27	2021-12-21	M	73	研究和试验发展	广东省	广州市	天河区	广州高新技术产业开发区南云四路1号	113.456	23.1513
530	广东华隧建设集团股份有限公司（曾用名：广东华隧建设股份有限公司）	2008-06-05	2022-01-27	E	47	房屋建筑业	广东省	广州市	花都区	广东省广州市花都区新华街迎宾大道95号交通局大楼13楼1308室	113.233	23.4075
531	广州市万和整形材料有限公司	1996-01-17	2020-11-12	C	27	医药制造业	广东省	广州市	天河区	广州市天河区燕岭路89号224房（不可作厂房）	113.334	23.1663
532	广州市今明科技有限公司	2000-06-06	2022-08-16	I	65	软件和信息技术服务业	广东省	广州市	天河区	广州市天河区大观中路492号广东岭南职业技术学院岭南科技中心二楼B-1室（该场所仅限办公用途）	113.423	23.1743
533	明纬（广州）电子有限公司（曾用名：广州铭纬电子产品有限公司）	2002-01-18	2023-06-16	C	39	计算机、通信和其他电子设备制造业	广东省	广州市	花都区	广州市花都区金谷南路11号	113.366	23.4481
534	广州标际包装设备有限公司	2002-07-26	2022-03-08	C	40	仪器仪表制造业	广东省	广州市	黄埔区	广州经济技术开发区锦秀路明华三街1号振兴工业大厦303房	113.53	23.0646
535	广州市创通联业科技有限公司	1999-07-07	2023-07-05	M	73	研究和试验发展	广东省	广州市	天河区	广州市天河区天河路518号2205房（仅限办公）	113.343	23.1389
536	意力（广州）电子科技有限公司	2005-12-28	2021-06-17	C	39	计算机、通信和其他电子设备制造业	广东省	广州市	黄埔区	广州市黄埔区南翔三路25号	113.46	23.1513
537	世纪龙信息网络有限责任公司	1999-12-09	2019-09-01	I	64	互联网和相关服务	广东省	广州市	天河区	广州市天河区龙口中路211号华天国际广场东苑1、2层	113.349	23.1459
538	广州市高一筹电器制造有限公司（曾用名：广州番禺五羊电缆制造有限公司）	2000-05-28	2018-10-11	C	38	电气机械和器材制造业	广东省	广州市	番禺区	广州市番禺区石壁街屏山二村中兴工业区	113.277	23.0079
539	广州帝隆科技股份有限公司（曾用名：广州帝隆计算机科技有限公司）	2006-03-01	2020-10-21	I	65	软件和信息技术服务业	广东省	广州市	越秀区	广州市越秀区东风中路515号201房（部位：自编号：201单元）	113.278	23.1381
540	广州文石信息科技有限公司	2008-12-16	2022-10-19	I	65	软件和信息技术服务业	广东省	广州市	南沙区	广州市南沙区市鱼路202号4栋101室	113.414	22.9002
541	广州兰格电气设备有限公司	2005-04-18	2020-09-02	C	38	电气机械和器材制造业	广东省	广州市	番禺区	广州市番禺区沙湾镇福涌村福龙路民营工业区四街5号之一	113.339	22.9267
542	广东曦达工程咨询有限公司（曾用名：广州曦达电力技术咨询有限公司）	2005-11-10	2023-02-22	M	74	专业技术服务业	广东省	广州市	天河区	广州市天河区体育西路191号B塔4008、4009单元（仅限办公）	113.327	23.1464
543	广州宏信塑胶工业有限公司	1995-09-28	2022-11-10	C	30	非金属矿物制品业	广东省	广州市	黄埔区	广州市黄埔区开创大道728号3栋205房间	113.54	23.1423
544	广州锐嘉工业股份有限公司（曾用名：广州市锐嘉包装设备有限公司）	2006-09-06	2022-08-16	C	35	专用设备制造业	广东省	广州市	黄埔区	广州市黄埔区埔南路63号之中3号厂房一层、二层	113.557	23.1354
545	广州三雅摩托车有限公司	1999-05-19	2020-07-16	C	37	铁路、船舶、航空航天和其他运输设备制造业	广东省	广州市	从化区	广州市从化城郊街新开埔顶	113.569	23.5645
546	广州普得环保设备有限公司	2006-11-09	2017-01-05	C	35	专用设备制造业	广东省	广州市	越秀区	广州市越秀区寺右新马路111-115号1419房（不可作厂房使用）	113.32	23.1265
547	海瑞克（广州）隧道设备有限公司	2002-09-09	2023-06-13	C	35	专用设备制造业	广东省	广州市	黄埔区	广州保税区保盈大道41号	113.55	23.0799
548	广州市欣瑞电子有限公司	2003-01-23	2017-08-24	C	39	计算机、通信和其他电子设备制造业	广东省	广州市	海珠区	广州市海珠区新港东路1166号1302、1303单元（仅限办公用途）	113.385	23.1022
549	广州尧先机械有限公司	2004-06-28	2016-09-07	C	35	专用设备制造业	广东省	广州市	花都区	广州市花都区花山镇华侨科技工业园	113.287	23.4641
550	广州视睿电子科技有限公司	2008-07-11	2022-12-16	M	73	研究和试验发展	广东省	广州市	黄埔区	广州市经济技术开发区科学城科珠路192号	113.445	23.1561
551	广州万户网络技术有限公司	2002-06-14	2022-10-25	I	65	软件和信息技术服务业	广东省	广州市	天河区	广州市天河区瑞华路1号4栋201房（部位:-21）	113.395	23.1263
552	广州威谱通信设备有限公司（曾用名：广州市华谱电子科技有限公司）	2004-03-31	2023-06-25	C	39	计算机、通信和其他电子设备制造业	广东省	广州市	天河区	广州市天河区珠村东横五路1号226室	113.432	23.128
553	广东启明软件开发有限公司	2008-11-04	2019-09-01	G	58	多式联运和运输代理业	广东省	广州市	黄埔区	广东省广州市科学城天丰路3号301房	113.468	23.1661
554	广州捷通计算机科技有限公司	2007-11-27	2022-03-17	M	73	研究和试验发展	广东省	广州市	天河区	广州市天河区金颖路1号金颖大厦1101自编之二房（仅限办公用途）	113.354	23.152
555	广州科力新能源股份有限公司（曾用名：广州科力新能源有限公司）	2006-05-24	2023-06-21	M	74	专业技术服务业	广东省	广州市	海珠区	广州经济技术开发区瑞发路15号自编四栋第7层	113.506	23.1627
556	广州市集智信息科技有限公司	2000-04-25	2022-08-09	I	65	软件和信息技术服务业	广东省	广州市	黄埔区	广州市黄埔区大沙地西6号1号楼305房（仅限办公）	113.443	23.1062
557	广州市海珥玛植物油脂有限公司	2007-11-27	2022-07-29	C	26	化学原料和化学制品制造业	广东省	广州市	白云区	广州市白云区石井街鸦岗村新场自编1号	113.202	23.2365
558	广东粤安信息技术有限公司	2004-02-16	2023-10-19	E	49	建筑安装业	广东省	广州市	天河区	广东省广州市天河区珠江西路15号第28层自编2804房	113.329	23.13
559	广东亚迪照明科技有限公司（曾用名：广东亚一照明科技有限公司）	2008-11-12	2023-03-30	C	39	计算机、通信和其他电子设备制造业	广东省	广州市	黄埔区	广州市黄埔区科丰路31号G1栋526房（仅限办公）	113.466	23.1551
560	广州钧钛电子科技有限公司	2004-11-26	2023-01-04	M	73	研究和试验发展	广东省	广州市	天河区	广州市天河区中山大道西89号4层440房（仅限办公）	113.363	23.1409
561	广州市迪士普音响科技有限公司	2001-12-10	2021-10-13	C	39	计算机、通信和其他电子设备制造业	广东省	广州市	白云区	广州市白云区江高镇夏荷路1号	113.218	23.2703
562	广州优锐生物科技有限公司	2007-01-18	2023-05-09	C	14	食品制造业	广东省	广州市	黄埔区	广州市黄埔区香山路17号C栋东座1201房	113.446	23.1856
563	广州高力电缆附件有限公司	1999-02-26	2020-12-31	C	38	电气机械和器材制造业	广东省	广州市	黄埔区	广州高新技术产业开发区东区建业三路6号自编第二栋二层202A	113.537	23.1379
564	广州广兴牧业设备集团有限公司（曾用名：广州广兴牧业设备有限公司）	2000-12-12	2021-12-02	C	35	专用设备制造业	广东省	广州市	白云区	广州市白云区太和镇沙亭广兴路2号	113.554	22.785
565	广州市镭迪机电制造技术有限公司	2005-09-13	2022-04-26	M	75	科技推广和应用服务业	广东省	广州市	番禺区	广州市番禺区洛浦街西一村工业路61号恒盛工业园27号102	113.277	23.055
566	广州柴油机厂股份有限公司	1978-05-22	2022-06-20	C	34	通用设备制造业	广东省	广州市	荔湾区	广州市荔湾区芳村大道东73号	113.223	23.1126
567	广东海王医药集团有限公司（曾用名：广东龙康医药有限公司）	2002-07-23	2023-01-20	C	27	医药制造业	广东省	广州市	天河区	广东省广州市天河区华利路19号二楼自编H01单元	113.323	23.1239
568	广州保瓦电子科技有限公司	2004-10-25	2022-01-19	M	73	研究和试验发展	广东省	广州市	南沙区	广州市南沙区东涌镇市鱼路237号B-302	113.426	22.8867
569	广州莱德联康生物科技有限公司（曾用名：广州华灿医药科技有限公司）	2007-10-26	2020-11-16	M	73	研究和试验发展	广东省	广州市	黄埔区	广州市黄埔区科学大道72-78号（双数）801房	113.436	23.1694
570	广州永新包装有限公司	2004-12-10	2021-06-28	C	29	橡胶和塑料制品业	广东省	广州市	从化区	广东从化经济开发区高湖路8号	113.518	23.4542
571	广东中科天元新能源科技有限公司	2006-09-02	2023-04-24	M	73	研究和试验发展	广东省	广州市	黄埔区	广州市高新技术产业开发区科学城揽月路80号广州科技创新基地综合服务楼第二层210单元	113.458	23.1658
572	广州市白云区超宝清洁用品公司	1994-06-23	2022-01-20	C	41	其他制造业	广东省	广州市	白云区	广州市白云区江高镇神山振华北路23号	113.198	23.3409
573	广州市邦富软件有限公司	2007-12-17	2021-08-13	M	73	研究和试验发展	广东省	广州市	天河区	广州市天河区天河软件园高唐新建区广州互联网产业园1号楼第五层A501至A510房	113.423	23.1824
574	广东法拉达汽车散热器有限公司	2008-03-13	2023-03-24	C	36	汽车制造业	广东省	广州市	番禺区	广州市番禺区沙头街南双玉村工业二路2号	113.308	22.9449
575	广东广风隆电子科技有限公司	2000-03-24	2019-09-01	I	65	软件和信息技术服务业	广东省	广州市	海珠区	广州市广州大道南敦和路189号海珠区科技园一号楼五楼	113.326	23.0941
576	广州立中锦山合金有限公司	2003-11-24	2023-03-27	C	32	有色金属冶炼和压延加工业	广东省	广州市	增城区	广州市增城仙村镇仙宁路498号车间办公D-5、铝液熔化主厂房A-8、主材库房A-10	113.711	23.1783
577	广州市中奕通讯设备有限公司	2004-02-17	2013-04-08	C	39	计算机、通信和其他电子设备制造业	广东省	广州市	天河区	广州市天河区翰景路1号金星大厦13层B部位	113.354	23.1498
578	广州环亚化妆品科技股份有限公司（曾用名：广州环亚化妆品科技有限公司）	2006-02-16	2021-11-02	C	26	化学原料和化学制品制造业	广东省	广州市	黄埔区	广州高新技术产业开发区广州科学城科林路15号	113.457	23.1472
579	广州金川环保设备有限公司	1998-05-05	2021-10-09	C	35	专用设备制造业	广东省	广州市	天河区	广州市天河区天河北路906号1306房（仅限办公用途）（不可作厂房）	113.351	23.1464
580	广州南联实业有限公司	1996-04-04	2017-11-06	C	35	专用设备制造业	广东省	广州市	白云区	广州市白云区民营科技园科园路8号自编1、2栋	113.343	23.3042
581	广州市金仪自动化有限公司	1992-11-02	2019-09-24	C	40	仪器仪表制造业	广东省	广州市	荔湾区	广州市荔湾区广钢集团有限公司内	113.257	23.0847
582	长视科技股份有限公司（曾用名：广州长视电子有限公司）	2006-04-29	2022-07-01	M	73	研究和试验发展	广东省	广州市	黄埔区	广州市黄埔区东明三路18号自编2栋	113.515	23.1542
583	广州市盛洲地基基础工程有限公司	2004-06-10	2022-03-16	M	74	专业技术服务业	广东省	广州市	番禺区	广州市番禺区桥南街蚬涌村蚬涌文明大街19号101室、201室、301室、401室，21号101室、201室、301室、401室	113.393	22.9201
584	广州赛思达机械设备有限公司	2004-10-08	2018-04-26	C	34	通用设备制造业	广东省	广州市	从化区	广州市从化区温泉镇石海工业区工业南路1号	113.657	23.5837
585	广州丽晶软件科技股份有限公司（曾用名：广州丽晶新未来电脑有限公司）	1995-02-23	2022-01-19	I	65	软件和信息技术服务业	广东省	广州市	天河区	广州市天河区科韵路12号之一2702-1	113.379	23.1322
586	广州九恒条码股份有限公司（曾用名：广州九恒条码有限公司）	2002-09-30	2023-03-31	C	23	印刷和记录媒介复制业	广东省	广州市	番禺区	广州市番禺区石楼镇莲花山保税加工区灵兴工业区7-8号（主厂房）	113.508	22.9704
587	广州威能机电有限公司	2005-03-08	2023-06-28	C	38	电气机械和器材制造业	广东省	广州市	番禺区	广州市番禺区沙头街丽骏路23号102	113.355	22.9382
588	广州市天马电讯科技有限公司	1994-12-03	2022-06-22	M	73	研究和试验发展	广东省	广州市	黄埔区	广州市萝岗区玉树工业园敬业四街J栋302房	113.44	23.1627
589	广州华生网络科技股份有限公司（曾用名：广州华生网络科技有限公司）	2007-11-26	2023-03-02	I	65	软件和信息技术服务业	广东省	广州市	黄埔区	广州市黄埔区（广州高新技术产业开发区）科学城科珠路203号708（仅限办公）	113.443	23.1702
590	广州回天新材料有限公司（曾用名：广州市回天精细化工有限公司）	2004-04-22	2023-09-28	C	26	化学原料和化学制品制造业	广东省	广州市	花都区	广州市花都区新华街岐北路6号	113.158	23.3724
591	广州优西商务咨询服务有限公司（曾用名：广州娱众信息技术有限公司）	2006-03-03	2019-12-19	L	72	商务服务业	广东省	广州市	天河区	广州市天河区体育东路140-148号323号商铺	113.336	23.1448
592	广州同道科技有限公司	2006-03-01	2017-10-18	M	73	研究和试验发展	广东省	广州市	天河区	广州市天河区天河北路892号1403房	113.351	23.1471
593	广州市新邦物流服务有限公司	2003-05-27	2019-09-23	G	58	多式联运和运输代理业	广东省	广州市	白云区	广州市白云区太和镇广从一路83号整栋	113.329	23.2651
594	广州市元善计算机科技有限公司	2008-02-01	2021-05-06	M	73	研究和试验发展	广东省	广州市	天河区	广州市天河区大观中路95号1栋307房（仅限办公）	113.413	23.1574
595	广州祈信金属制品有限公司	2002-11-01	2022-09-21	C	33	金属制品业	广东省	广州市	南沙区	广州市南沙区东涌镇鱼窝头大道88号	113.458	22.8523
596	广州市华标科技发展有限公司	2007-12-03	2023-11-07	M	73	研究和试验发展	广东省	广州市	天河区	广州市天河区高普路97号五层（仅限办公，不可做厂房使用）	113.418	23.1856
597	广州洁特生物过滤股份有限公司（曾用名：广州洁特生物过滤制品有限公司）	2001-04-11	2022-11-28	M	73	研究和试验发展	广东省	广州市	黄埔区	广州经济技术开发区永和经济区斗塘路1号	113.566	23.212
598	纽宝力精化（广州）有限公司	2001-04-30	2020-10-26	C	26	化学原料和化学制品制造业	广东省	广州市	南沙区	广州市南沙区环市大道北7号	113.57	22.7601
599	广州开能电气技术有限公司（曾用名：广州开能电气实业有限公司）	2006-07-20	2022-03-02	C	38	电气机械和器材制造业	广东省	广州市	黄埔区	广州市黄埔区科学城南翔一路68号3栋102房、202房和302房	113.449	23.1767
600	广州精通教育科技有限公司	2007-07-13	2021-03-22	M	73	研究和试验发展	广东省	广州市	天河区	广州市天河区长源路21号有园·长湴大学堂创新园自编A2栋（仅限办公）	113.353	23.1736
601	广州热点软件科技股份有限公司（曾用名：广州热点软件有限公司）	2007-09-20	2017-09-30	M	73	研究和试验发展	广东省	广州市	天河区	广州市天河区天河北路689号25F2房（不可作厂房）	113.348	23.1474
602	广东联汛教育科技有限公司（曾用名：广州联汛数码科技有限公司）	2004-01-13	2021-06-03	M	73	研究和试验发展	广东省	广州市	天河区	广州市天河区建中路18、20号4楼401	113.377	23.1319
603	广州市银三环机械有限公司	1997-06-09	2022-11-25	C	34	通用设备制造业	广东省	广州市	花都区	广州市花都区新华镇港口工业区东风大道西	113.153	23.3627
604	广州市番禺财益机械工业有限公司	1993-11-17	2014-08-20	C	23	印刷和记录媒介复制业	广东省	广州市	番禺区	广州市番禺区桥南街陈涌村第二工业区	113.364	22.9018
605	广州科密股份有限公司（曾用名：增城市新特电器有限公司）	1999-06-11	2015-09-11	C	34	通用设备制造业	广东省	广州市	增城区	广州市增城朱村街朱村村依罗氹（土名）	113.702	23.2818
606	爱司凯科技股份有限公司（曾用名：广州市爱司凯机械设备有限公司）	2006-12-18	2023-10-19	M	75	科技推广和应用服务业	广东省	广州市	黄埔区	广州市黄埔区工业园红卫路15号	113.505	23.3954
607	中经汇通有限责任公司	2008-05-26	2021-01-11	J	69	其他金融业	广东省	广州市	黄埔区	广州市黄埔区大沙东6号1310房	113.464	23.1119
608	贝恩医疗设备（广州）有限公司	2003-06-13	2020-06-02	C	26	化学原料和化学制品制造业	广东省	广州市	黄埔区	广州经济技术开发区东区骏成路10号	113.52	23.1475
609	广州保得威尔电子科技股份有限公司（曾用名：广州保得威尔电子科技有限公司）	2006-05-25	2022-08-05	M	73	研究和试验发展	广东省	广州市	黄埔区	广州市黄埔区开源大道11号C2栋201室	113.502	23.1594
610	广州市新兴电缆实业有限公司	2003-12-30	2019-11-25	C	38	电气机械和器材制造业	广东省	广州市	增城区	广州市增城新塘镇创新大道27号	113.641	23.1687
611	广东日昭新技术应用有限公司	2001-04-05	2023-06-06	M	73	研究和试验发展	广东省	广州市	白云区	广州市白云区石门街滘心旧庄大街2号A1栋509-510室	113.226	23.2343
612	广州市凯捷电源实业有限公司	2002-04-09	2022-01-26	C	38	电气机械和器材制造业	广东省	广州市	花都区	广州市花都区秀全街瑞香路28号	113.171	23.4121
613	广州华大生物科技有限公司	2008-02-28	2021-12-15	M	75	科技推广和应用服务业	广东省	广州市	黄埔区	广州高新技术产业开发区伴河路84号（仅限办公）	113.519	23.158
614	广州佳和立创科技发展有限公司	2001-05-30	2022-11-16	M	73	研究和试验发展	广东省	广州市	天河区	广州市天河区棠安路288号1027房	113.383	23.142
615	广州益方田园环保股份有限公司（曾用名：广州益方田园环保科技开发有限公司）	2001-07-24	2016-08-31	M	74	专业技术服务业	广东省	广州市	黄埔区	广州市萝岗区科学大道科汇发展中心科汇一街11号201房	113.442	23.1732
616	益善生物技术股份有限公司（曾用名：广州益善生物技术有限公司）	2006-11-28	2021-01-14	M	73	研究和试验发展	广东省	广州市	黄埔区	广州市黄埔区广州国际生物岛螺旋三路29号	113.376	23.0674
617	广州因孚网络科技有限公司	2007-11-01	2021-12-06	M	73	研究和试验发展	广东省	广州市	天河区	广州市天河区天河北路663号大院自编8栋3楼自编336号	113.373	23.1403
618	广州盈正信息技术有限公司	2004-04-08	2023-05-20	I	64	互联网和相关服务	广东省	广州市	天河区	广州市天河区花城大道770号1125房	113.355	23.1222
619	广州友田机电设备有限公司	2004-02-09	2020-07-13	C	35	专用设备制造业	广东省	广州市	黄埔区	广州高新技术产业开发区科学城南翔三路11号	113.452	23.1547
620	广州粤亮信息科技有限公司	2009-09-21	2016-09-27	M	73	研究和试验发展	广东省	广州市	天河区	广州市天河区天河北路898号309房	113.352	23.1471
621	广州长嘉电子有限公司	2006-05-17	2021-06-30	C	39	计算机、通信和其他电子设备制造业	广东省	广州市	南沙区	广州市南沙区东涌镇洲兴街139号	113.487	22.8091
622	广州兆威电子科技股份有限公司（曾用名：广州兆威电子科技开发有限公司）	2002-03-23	2017-06-30	M	73	研究和试验发展	广东省	广州市	荔湾区	广州市荔湾区海龙路19号3楼	113.215	23.053
623	广州至拓网络科技有限公司	2006-12-01	2021-11-30	I	65	软件和信息技术服务业	广东省	广州市	天河区	广州市天河区体育东路122号之二1306室（仅限办公）	113.336	23.1423
624	广州智择物业管理有限责任公司（曾用名：广州智择电子科技有限公司）	2003-08-05	2023-07-31	C	39	计算机、通信和其他电子设备制造业	广东省	广州市	增城区	广州增城市新塘镇南安村桥头山（土名）	113.576	23.1229
625	广州中科诺泰技术有限公司	2007-06-25	2023-07-21	I	65	软件和信息技术服务业	广东省	广州市	天河区	广州市天河区天河北路898号3201室（部位：自编3206-3211单元）（仅限办公）	113.352	23.1471
626	广州众恒光电科技股份有限公司（曾用名：广州众恒光电科技有限公司）	2008-03-31	2021-02-26	M	75	科技推广和应用服务业	广东省	广州市	白云区	广州市白云区集贤路集安街3号609房	113.307	23.2347
627	广州美普森包装有限公司（曾用名：国际纸业舒尔物德包装（广州）有限公司）	1996-03-28	2022-04-18	C	22	造纸和纸制品业	广东省	广州市	黄埔区	广州经济技术开发区东区宏远路1号	113.556	23.1259
628	皇家空调设备工程（广东）有限公司	1995-01-11	2023-09-05	C	38	电气机械和器材制造业	广东省	广州市	白云区	广州市白云区北太路1633号广州民营科技园科兴路1号	113.341	23.3015
629	捷荣航材（广州）有限公司	2003-12-03	2022-08-17	C	37	铁路、船舶、航空航天和其他运输设备制造业	广东省	广州市	花都区	广州市花都区花山镇华辉路7号	113.292	23.4619
630	金鹏源康（广州）精密电路有限公司	2005-05-20	2023-09-01	C	39	计算机、通信和其他电子设备制造业	广东省	广州市	黄埔区	广州高新技术产业开发区神舟路9号一楼首层北面	113.438	23.1753
631	赛沃纳如（广州）乳胶制品科技有限公司（曾用名：赛沃纳如（广州）鞋材有限公司）	1997-12-30	2023-02-16	C	19	皮革、毛皮、羽毛及其制品和制鞋业	广东省	广州市	黄埔区	广州市黄埔区花轮一路2号，永和金融大楼8楼801-803（仅限办公）	113.569	23.2012
632	实达科技（广州）医疗系统有限公司	1998-10-06	2015-12-28	M	73	研究和试验发展	广东省	广州市	天河区	广州市天河区粤垦路623号燕都商务大厦1302房	113.333	23.164
633	四维尔丸井（广州）汽车零部件有限公司	2004-09-06	2023-03-17	C	36	汽车制造业	广东省	广州市	黄埔区	广州经济技术开发区东区骏功路15号	113.534	23.1367
634	增城华栋调味品有限公司	1995-06-30	2023-05-19	C	14	食品制造业	广东省	广州市	增城区	广州增城市石滩镇麻车村斜岭	113.782	23.1992
635	中天启明石油技术有限公司	2009-12-07	2022-01-10	M	73	研究和试验发展	广东省	广州市	黄埔区	广州市萝岗区瑞和路73号	113.51	23.1622
636	纵横天地电子商旅服务有限公司	2004-07-29	2019-09-01	G	56	航空运输业	广东省	广州市	越秀区	广州市越秀区先烈南路23号104-105房	113.297	23.1396
637	广东晟世投资置业有限公司（曾用名：广东晟世有色金属仓储物流有限公司）	1984-04-20	2023-10-27	K	70	房地产业	广东省	广州市	荔湾区	广州市荔湾区黄沙大道131号自编4号2层206-208房（仅限办公用途）	113.237	23.1227
638	广州市娇兰化妆品有限公司	1999-05-28	2022-03-24	C	26	化学原料和化学制品制造业	广东省	广州市	白云区	广州市白云区广从八路785号	113.433	23.3908
639	广州威信信息科技发展有限公司	2008-06-23	2020-06-18	M	73	研究和试验发展	广东省	广州市	黄埔区	广州高新技术产业开发区神舟路9号三楼南面309室	113.438	23.1753
640	广州飞瑞敖电子科技股份有限公司（曾用名：广州飞瑞敖电子科技有限公司）	2006-08-12	2021-02-04	M	73	研究和试验发展	广东省	广州市	番禺区	广州市番禺区东环街番禺大道北555号番禺节能科技园内天安科技创业中心503	113.371	22.9852
641	广州慧能建设科技股份有限公司（曾用名：广州睿慧新电子系统有限公司）	2003-06-05	2019-08-20	M	73	研究和试验发展	广东省	广州市	越秀区	广州市高新技术产业开发区科学城掬泉路3号广州国际企业孵化器E区E301、E302、E303、E304号房	113.454	23.1685
642	广州市一杰医药科技有限公司	1999-11-09	2021-05-18	M	73	研究和试验发展	广东省	广州市	黄埔区	广州高新技术产业开发区科学城开源大道11号C1栋三层	113.442	23.166
643	广州市润杰医疗器械有限公司	2003-04-18	2023-05-15	I	65	软件和信息技术服务业	广东省	广州市	黄埔区	广州市黄埔区开泰大道28号1101房、1102房、1103房、1104房、1105房、1106房、1107房	113.476	23.1687
644	广东蓝岛生物技术有限公司	2003-01-16	2023-11-09	M	73	研究和试验发展	广东省	广州市	黄埔区	广州市黄埔区九龙镇红卫广华路33号101房	113.591	23.2832
645	广州森纳士仪器有限公司	1995-01-03	2018-11-28	C	40	仪器仪表制造业	广东省	广州市	天河区	广州市天河区广汕二路600号之二首层102	113.42	23.1965
646	广州晨扬通信技术有限公司	2006-09-27	2022-09-02	I	64	互联网和相关服务	广东省	广州市	黄埔区	广州市黄埔区光谱中路11号2栋2单元1001房	113.451	23.1655
647	广州华英信息技术有限公司	2006-04-12	2016-04-06	I	65	软件和信息技术服务业	广东省	广州市	天河区	广州市天河区燕岭路93号808房	113.335	23.1666
648	天意有福科技股份有限公司（曾用名：广州市有福数码科技有限公司）	2007-08-27	2022-03-03	C	23	印刷和记录媒介复制业	广东省	广州市	白云区	广州市白云区广从五路410号	113.378	23.3576
649	广州恒发集团有限公司（曾用名：广州市恒发水产有限公司）	1998-04-06	2012-10-31	D	44	电力、热力生产和供应业	广东省	广州市	南沙区	广州市南沙区万顷沙镇新港大道一号之八301房	113.646	22.6157
650	优拓电子（广州）有限公司	2003-08-20	2018-12-05	C	38	电气机械和器材制造业	广东省	广州市	番禺区	广州市番禺区大石街会江村石南路53号A栋501	113.301	23.0159
651	广州运维数字科技有限公司（曾用名：广州运维电力科技有限公司）	2003-11-25	2023-09-18	M	73	研究和试验发展	广东省	广州市	黄埔区	广州高新技术产业开发区科学城彩频路7号之一801、803房	113.442	23.166
652	广州芯德通信科技股份有限公司（曾用名：广州市芯德电子技术有限公司）	2007-04-09	2021-11-24	C	39	计算机、通信和其他电子设备制造业	广东省	广州市	黄埔区	广州高新技术产业开发区科学城科学大道162号B2栋601	113.442	23.166
653	广东丸美生物技术股份有限公司（曾用名：广州佳禾化妆品制造有限公司）	2002-04-02	2023-04-13	M	73	研究和试验发展	广东省	广州市	黄埔区	广州高新技术产业开发区科学城伴河路92号2号楼	113.518	23.16
654	广东中大环保科技投资有限公司	2008-05-20	2023-01-12	L	72	商务服务业	广东省	广州市	越秀区	广州市越秀区广州大道中289号南方传媒大厦B座2214房（仅限办公用途）	113.321	23.1283
655	广州迪森热能设备有限公司	2002-11-13	2022-11-07	C	34	通用设备制造业	广东省	广州市	黄埔区	广州经济技术开发区沧联二路3号	113.558	23.1244
656	广州西维尔计算机系统有限公司	1999-07-12	2016-07-21	M	73	研究和试验发展	广东省	广州市	天河区	广州市天河区天河软件园高普路1023号587室	113.42	23.179
657	广东星辉天拓互动娱乐有限公司（曾用名：广东天拓资讯科技有限公司）	2000-07-10	2022-03-31	R	90	娱乐业	广东省	广州市	天河区	广州市天河区黄埔大道西122号之二2101室、2102室、2103室、2104室、2105室、2201室、2202室、2203室、2204室、2205室、2301室、2302室、2303室、2304室、2305室、2401室、2402室、2403室、2404室、2405室（仅限办公）
658	广州暨嘉智能设备有限公司（曾用名：广州市暨嘉信息科技有限公司）	1999-01-25	2023-05-08	C	39	计算机、通信和其他电子设备制造业	广东省	广州市	天河区	广州市天河区华观路1933号之一512房	113.409	23.1744
659	广州盛发商务咨询有限公司（曾用名：广州悠乐无线科技有限公司）	2009-03-29	2020-01-02	L	72	商务服务业	广东省	广州市	天河区	广州市天河区建中路64、66号东704-1房（本住所限办公用途）	113.377	23.1287
660	广州东海敏孚汽车部件有限公司	2006-03-27	2023-10-25	C	36	汽车制造业	广东省	广州市	黄埔区	广州经济技术开发区春分路41号	113.582	23.2065
661	广州捷能电力科技有限公司	2007-12-28	2019-09-04	M	73	研究和试验发展	广东省	广州市	黄埔区	广州高新技术产业开发区科学城光谱西路69号TCL文化产业园一期一楼103室	113.443	23.1657
662	广州晶绘实业有限公司	2006-07-10	2023-07-28	C	39	计算机、通信和其他电子设备制造业	广东省	广州市	增城区	广州市增城区新塘镇久裕村林山咀（土名）	113.654	23.1287
663	广州科方生物技术股份有限公司（曾用名：广州科方生物技术有限公司）	2004-09-22	2023-07-10	M	73	研究和试验发展	广东省	广州市	天河区	广州高新技术产业开发区科学城开源大道11号C4栋五层、六层	113.442	23.166
664	广州博善生物科技股份有限公司（曾用名：广州市博善生物饲料有限公司）	2007-03-07	2018-01-02	M	73	研究和试验发展	广东省	广州市	黄埔区	广州市萝岗区广州科学城广州国际企业孵化楼（D区）D503房	113.271	23.1353
665	国鸿科技股份有限公司（曾用名：广东国鸿资讯科技有限公司）	1997-11-07	2022-06-10	I	65	软件和信息技术服务业	广东省	广州市	天河区	广州市天河区天河路490号壬丰大厦A座19楼1903室	113.342	23.1385
666	广州市森锐科技股份有限公司（曾用名：广州市森锐电子科技有限公司）	2008-01-21	2023-06-20	C	39	计算机、通信和其他电子设备制造业	广东省	广州市	天河区	广州市高新技术产业开发区科学城科学大道182号C2区503	113.461	23.172
667	广州市恒吉电子科技有限公司	2003-06-04	2019-10-16	M	73	研究和试验发展	广东省	广州市	黄埔区	广州市黄埔区开源大道188号自编七栋202房	113.518	23.1611
668	广东浪潮创新计算机科技服务有限公司	2004-05-24	2023-07-10	M	73	研究和试验发展	广东省	广州市	番禺区	广州市番禺区钟村街市广路钟三路段13号之一	113.332	22.9811
669	广州市汉和信息技术有限公司	2003-06-19	2015-11-25	I	65	软件和信息技术服务业	广东省	广州市	天河区	广州市天河区中山大道建工路13、15号708房	113.379	23.1288
670	广东晶科电子股份有限公司（曾用名：晶科电子（广州）有限公司）	2006-08-30	2022-06-14	C	39	计算机、通信和其他电子设备制造业	广东省	广州市	南沙区	广州市南沙区环市大道南33号	113.571	22.7588
671	广州光亚网络科技有限公司	2008-09-03	2019-04-26	M	73	研究和试验发展	广东省	广州市	天河区	广州市天河区天慧路18号（仅限办公）	113.428	23.1866
672	广州嘉崎智能科技有限公司	2009-02-23	2022-08-11	M	73	研究和试验发展	广东省	广州市	黄埔区	广州市黄埔区光谱东路238号A栋517室	113.494	23.1589
673	广州市花都丰圣树脂有限公司	1996-03-28	2016-03-11	C	26	化学原料和化学制品制造业	广东省	广州市	花都区	广州市花都区赤坭镇工业区	113.091	23.3905
674	广州凯因科技有限公司	2003-10-17	2023-07-07	I	65	软件和信息技术服务业	广东省	广州市	天河区	广州市天河区车陂东闸口大街3号315室	113.405	23.1243
675	广州睿博电子科技有限公司	2009-10-16	2018-08-08	C	39	计算机、通信和其他电子设备制造业	广东省	广州市	黄埔区	广州市黄埔区青年路329号301室之26	113.54	23.0711
676	广州南海机器厂有限公司	1981-06-20	2021-03-01	C	39	计算机、通信和其他电子设备制造业	广东省	广州市	天河区	广州市天河区沙河东莞庄	113.343	23.1627
677	广州华创化工材料科技开发有限公司	2007-05-08	2022-03-31	M	73	研究和试验发展	广东省	广州市	增城区	广州市增城永宁街新耀北路52号（厂房A1）	113.625	23.1805
678	广州市凯米瑞化肥有限公司	2007-04-11	2022-11-15	C	26	化学原料和化学制品制造业	广东省	广州市	南沙区	广州市南沙区东涌镇大稳村稳发路999号	113.447	22.883
679	广州蓝钥匙海洋生物工程有限公司	1994-04-14	2023-06-02	M	75	科技推广和应用服务业	广东省	广州市	海珠区	广州市海珠区新港中路艺影街11号1710房（仅作写字楼功能用）	113.318	23.1019
680	爱华特（广州）通讯有限公司	1993-05-12	2023-05-10	C	39	计算机、通信和其他电子设备制造业	广东省	广州市	黄埔区	广州市黄埔区宏明路4号2栋1302房2栋1301房2栋1304房2栋1303房2栋1306房2栋1305房2栋1308房2栋1307房	113.556	23.1228
681	达尔嘉（广州）标识设备有限公司	2004-06-03	2022-09-21	C	34	通用设备制造业	广东省	广州市	黄埔区	广州经济技术开发区锦绣路19号	113.53	23.0653
682	德高（广州）建材有限公司	2006-05-11	2022-07-28	C	26	化学原料和化学制品制造业	广东省	广州市	从化区	广州市从化区兴园南路23号1栋、2栋	113.552	23.593
683	中达安股份有限公司（曾用名：广东达安工程项目管理有限公司）	2000-08-08	2023-10-31	M	74	专业技术服务业	广东省	广州市	白云区	广州市白云区沙太南路668号之二901-903房	113.341	23.1839
684	广东华拿东方能源有限公司	2005-05-18	2021-03-26	C	38	电气机械和器材制造业	广东省	广州市	黄埔区	广州市萝岗区广州开发区科学城彩频路7号之一101单元	113.442	23.166
685	广东建安自动化系统工程有限公司	1997-12-31	2021-12-15	M	73	研究和试验发展	广东省	广州市	天河区	广州市天河区黄埔大道中翠湖街2-5号负一层商场10号铺A09	113.359	23.1326
686	广东科利亚现代农业装备有限公司	2009-12-22	2023-04-24	C	35	专用设备制造业	广东省	广州市	增城区	广州市增城新塘镇新和北路34号	113.641	23.1771
687	拉多美科技集团股份有限公司（曾用名：广东拉多美化肥有限公司）	2003-12-19	2023-03-09	C	26	化学原料和化学制品制造业	广东省	广州市	南沙区	广州市南沙区东涌镇三沙港路28号	113.501	22.8968
688	广东南方碱业股份有限公司	1989-05-15	2023-08-24	C	26	化学原料和化学制品制造业	广东省	广州市	黄埔区	广州市黄埔区南岗西路４８８号	113.575	23.0975
689	广东诺博尔电子科技有限公司	2007-05-17	2019-09-01	C	39	计算机、通信和其他电子设备制造业	广东省	广州市	荔湾区	广州市荔湾区大坦沙岛桥中中路186号一层自编9-28号	113.285	23.1126
690	广东欧派家居集团有限公司	1994-07-01	2023-10-13	C	21	家具制造业	广东省	广州市	白云区	广州市白云区广花三路366号	113.25	23.3056
691	广东荣晖信息工程有限公司	2000-09-19	2020-10-19	M	74	专业技术服务业	广东省	广州市	天河区	广州市天河区林和中路172号5楼506房	113.332	23.154
692	广东省城乡规划设计研究院	2001-05-21	-	M	74	专业技术服务业	广东省	广州市	越秀区	广州市东风中路335号	113.276	23.1376
693	广东省通信产业服务有限公司	2006-09-08	2021-08-02	I	63	电信、广播电视和卫星传输服务	广东省	广州市	天河区	广州市天河区华景路1号南方通信大厦27层E房	113.364	23.1409
694	广东索弗健康科技集团有限公司（曾用名：广东索弗电子实业有限公司）	2004-10-25	2023-11-08	M	73	研究和试验发展	广东省	广州市	花都区	广州市花都区迎宾大道92号201室	113.213	23.4061
695	广东信源物流设备有限公司	1986-11-10	2023-06-08	C	34	通用设备制造业	广东省	广州市	天河区	广州市天河区元岗路399号	113.349	23.1834
696	广东亚太天能投资有限公司（曾用名：广东亚太天能信息识别技术有限公司）	2003-08-26	2020-03-24	L	72	商务服务业	广东省	广州市	天河区	广州市天河区天河北路233号5505房	113.331	23.1474
697	广东意维高玻璃技术有限公司	1999-05-24	2015-03-09	C	35	专用设备制造业	广东省	广州市	花都区	广州市花都区新华街广塘村北一经济社	113.219	23.4101
698	广州安特激光技术有限公司	2003-02-11	2019-08-21	C	39	计算机、通信和其他电子设备制造业	广东省	广州市	黄埔区	广州经济技术开发区科学城彩频路11号F201	113.443	23.1679
699	广州奥迪通用照明有限公司	1999-11-19	2018-03-26	C	38	电气机械和器材制造业	广东省	广州市	白云区	广州市白云区江高镇	113.241	23.2967
700	广州奥翼电子科技股份有限公司（曾用名：广州奥翼电子科技有限公司）	2008-07-03	2023-08-22	C	39	计算机、通信和其他电子设备制造业	广东省	广州市	南沙区	广州市南沙区珠江街珠江大道430号之三第十层、第十一层	113.542	22.7333
701	广州澳捷科技有限公司	2003-03-28	2023-03-21	C	39	计算机、通信和其他电子设备制造业	广东省	广州市	从化区	广州市从化区明珠工业园明珠大道南30号1栋901室	113.545	23.5715
702	广州百田信息科技有限公司	2009-06-02	2023-10-16	I	65	软件和信息技术服务业	广东省	广州市	天河区	广州市天河区高普路1023号5233室（仅限办公用途）	113.42	23.179
703	广州超前计算机科技有限公司	2008-02-01	2020-06-23	I	65	软件和信息技术服务业	广东省	广州市	天河区	广州市天河区华强路9号907房（仅限办公）	113.327	23.1319
704	广州达博生物制品有限公司	2001-05-28	2023-02-13	M	73	研究和试验发展	广东省	广州市	黄埔区	广州市黄埔区开源大道11号B1栋801室	113.502	23.1594
705	广州大学城华电新能源有限公司	2008-02-25	2023-08-18	D	44	电力、热力生产和供应业	广东省	广州市	番禺区	广州市番禺区南村镇兴南大道258号	113.394	23.0161
706	广州德昊电力科技有限公司（曾用名：广州德昊电子科技有限公司）	2008-09-28	2021-12-16	M	73	研究和试验发展	广东省	广州市	黄埔区	广州市黄埔区科学大道162号B1栋406房	113.457	23.17
707	广州电装有限公司	2003-05-12	2023-02-20	C	36	汽车制造业	广东省	广州市	增城区	广州市增城永宁街创强路171号	113.665	23.19
708	广州顶津食品有限公司	1995-11-23	2022-07-19	C	15	酒、饮料和精制茶制造业	广东省	广州市	黄埔区	广州经济技术开发区东区沧联一路2号	113.553	23.1241
709	广州鼎甲计算机科技有限公司	2009-02-26	2023-02-21	M	73	研究和试验发展	广东省	广州市	黄埔区	广州高新技术产业开发区科学大道243号901房	113.304	23.1477
710	广州栋方生物科技股份有限公司（曾用名：广州栋方日化有限公司）	2003-09-03	2021-03-23	C	26	化学原料和化学制品制造业	广东省	广州市	花都区	广州市花都区新雅街镜湖大道68号	113.254	23.3857
711	广州番禺旭东阪田电子有限公司	1994-08-12	2021-04-23	C	39	计算机、通信和其他电子设备制造业	广东省	广州市	番禺区	广州市番禺区大龙街罗家村	113.393	22.9467
712	高金技术产业集团有限公司（曾用名：广州高金技术产业集团有限公司）	2005-07-05	2023-08-04	M	73	研究和试验发展	广东省	广州市	黄埔区	广州市高新技术产业开发区科学城科丰路31号自编一栋1016号房	113.466	23.1551
713	广州高清视信科技股份有限公司（曾用名：广州高清视信数码科技股份有限公司）	2007-10-18	2023-03-07	M	73	研究和试验发展	广东省	广州市	番禺区	广州市番禺区小谷围街大学城外环西路318号3栋332-7室	113.379	23.0584
714	广州广富装卸箱机械有限公司	2004-08-19	2019-10-09	C	34	通用设备制造业	广东省	广州市	番禺区	广州市番禺区石楼镇华实路二巷3号103之二	113.494	22.9749
715	广州广日电梯工程有限公司	1983-03-31	2020-12-17	E	49	建筑安装业	广东省	广州市	天河区	广州市天河区天河路238号华龙大厦601－606房	113.339	23.1384
716	广州广日智能停车设备有限公司	2007-02-05	2023-03-23	C	34	通用设备制造业	广东省	广州市	番禺区	广州市番禺区石楼镇国贸大道南636号之一	113.481	22.987
717	广州国灵空调有限公司	2003-07-25	2023-03-13	C	34	通用设备制造业	广东省	广州市	花都区	广州市花都区花东镇华侨经济开发试验区	113.414	23.4389
718	广州浩胜食品机械有限公司	1998-09-25	2021-05-10	C	15	酒、饮料和精制茶制造业	广东省	广州市	花都区	广州市花都区狮岭镇山前大道中65号	113.228	23.4913
719	广州禾信仪器股份有限公司（曾用名：广州禾信分析仪器有限公司）	2004-06-24	2023-06-09	C	40	仪器仪表制造业	广东省	广州市	黄埔区	广州市黄埔区新瑞路16号	113.479	23.1668
720	广州衡纬科技有限公司	2002-06-28	2022-06-07	M	73	研究和试验发展	广东省	广州市	越秀区	广州市越秀区寺右新马路108号丰伟大厦7C、D室	113.315	23.1255
721	广州华韩电子有限公司	2003-08-18	2015-02-05	C	39	计算机、通信和其他电子设备制造业	广东省	广州市	花都区	广州市花都区炭歩镇沿北路12号之二301（可作厂房使用）	113.227	23.4112
722	广州华南信息技术有限公司	2006-07-28	2023-09-22	C	39	计算机、通信和其他电子设备制造业	广东省	广州市	白云区	广州市白云区沙太路华苑街18号大院内自编19号2层	113.336	23.1856
723	广州华玺医疗科技有限公司	2005-09-07	2017-10-11	M	73	研究和试验发展	广东省	广州市	黄埔区	广州高新技术产业开发区科学城开源大道11号A8栋六层	113.442	23.166
724	广州房博士网络股份有限公司（曾用名：广州华讯通信技术有限公司）	2003-12-30	2021-10-25	I	64	互联网和相关服务	广东省	广州市	黄埔区	广州市黄埔区黄埔大道东856号1502-1504房	113.476	23.1017
725	广州辉远电子技术有限公司	2004-10-28	2018-07-31	M	73	研究和试验发展	广东省	广州市	黄埔区	广州高新技术产业开发区科学城彩频路7号501室	113.441	23.1694
726	广州汇达信息科技有限公司	2017-07-07	2018-11-15	I	65	软件和信息技术服务业	广东省	广州市	海珠区	广州市海珠区新港西路135号大院中大蒲园区628栋中大科技园A座自编1305房（仅限办公用途）	113.298	23.0991
727	广州基业长青新材料股份有限公司（曾用名：广州基业长青化工有限公司）	2008-12-11	2023-04-27	C	26	化学原料和化学制品制造业	广东省	广州市	从化区	广州市从化区太平镇新兴路439号7栋101室	113.352	23.0012
728	广州捷游信息科技有限公司	2006-08-21	2022-08-04	M	75	科技推广和应用服务业	广东省	广州市	海珠区	广州市海珠区桥头大街248号之十七309室（仅限办公）	113.382	23.0947
729	广州精标信息科技有限公司	2020-07-14	2020-07-14	I	65	软件和信息技术服务业	广东省	广州市	南沙区	广州市南沙区丰泽东路106号（自编1号楼）X1301-G019400	113.538	22.7953
730	广州隽康生物科技有限公司	2004-05-19	2022-01-17	M	73	研究和试验发展	广东省	广州市	黄埔区	广州市黄埔区南云五路11号D栋404单元	113.462	23.1517
731	广州凯盛电子科技有限公司	2006-08-15	2015-12-24	M	73	研究和试验发展	广东省	广州市	黄埔区	广州市黄埔区埔南路沧联工业园区C、D栋	113.562	23.1265
732	广州康和药业有限公司	2001-08-09	2020-06-24	C	27	医药制造业	广东省	广州市	番禺区	广州市番禺区石楼镇莲花西路113号	113.502	22.9837
733	广东康利达物联科技有限公司（曾用名：广州康利达信息技术有限公司）	2001-12-06	2022-11-14	C	39	计算机、通信和其他电子设备制造业	广东省	广州市	天河区	广州市天河区思成路17号101房（仅限办公用途）	113.424	23.1797
734	广州柯兰特热能科技有限公司	2006-04-05	2019-08-06	M	73	研究和试验发展	广东省	广州市	番禺区	广州市番禺区南村镇新基大道东6号B区二层	113.374	23.0333
735	广州科城环保科技有限公司	2007-09-18	2020-05-13	M	73	研究和试验发展	广东省	广州市	黄埔区	广州高新技术产业开发区光谱东路3号	113.475	23.162
736	广州科佳环保设备有限公司	2008-12-24	2020-10-30	C	35	专用设备制造业	广东省	广州市	番禺区	广州市番禺区化龙镇山门村环村公路3号102	113.456	23.0007
737	广州宽度信息技术有限公司	2008-12-30	2016-08-22	M	73	研究和试验发展	广东省	广州市	黄埔区	广州高新技术产业开发区科学城科学大道162号B2区第5层502单元	113.442	23.166
738	广州蓝梵信息科技股份有限公司（曾用名：广州蓝梵信息科技有限公司）	2007-08-22	2023-09-13	I	65	软件和信息技术服务业	广东省	广州市	天河区	广州市天河区高普路138号西座四楼405单元	113.417	23.1773
739	广州蓝月亮实业有限公司	2001-01-09	2021-01-29	M	73	研究和试验发展	广东省	广州市	黄埔区	广州市黄埔区云埔工业区埔南路36号	113.554	23.1341
740	广州力方信息科技有限公司	2004-02-25	2021-08-31	M	73	研究和试验发展	广东省	广州市	天河区	广州市天河区珠吉路59号之二四楼B4762	113.433	23.1349
741	广州历康信息科技股份有限公司（曾用名：广州历康信息科技有限公司）	2003-09-24	2023-07-06	I	65	软件和信息技术服务业	广东省	广州市	天河区	广州市高新技术产业开发区科学城南云一路2号自编二栋203（仅限办公用途）	113.449	23.1551
742	耀有光科技集团有限公司（曾用名：广州良业照明工程有限公司）	2008-08-04	2023-01-16	L	71	租赁业	广东省	广州市	海珠区	广州市海珠区琶洲蟠龙新街3号1611房（仅限办公）	113.39	23.1058
743	广州领步电气技术有限公司	2009-06-16	2016-01-05	M	73	研究和试验发展	广东省	广州市	天河区	广州市天河区龙怡路117号1204-1206房（本住所仅限办公功能）	113.352	23.1497
744	广州南部工程塑料有限公司	2003-10-29	2022-12-27	C	29	橡胶和塑料制品业	广东省	广州市	黄埔区	广州市黄埔区开创大道108号201房之233房（仅限办公）	113.551	23.1125
745	广东澎湃科技有限公司（曾用名：广州澎湃通信科技有限公司）	2007-06-21	2021-12-28	M	73	研究和试验发展	广东省	广州市	海珠区	广州市海珠区广州大道南448号513室（部位：自编之一）（仅限办公）	113.276	23.101
746	广州普星药业有限公司	2006-02-17	2021-04-13	M	73	研究和试验发展	广东省	广州市	黄埔区	广州经济技术开发区开发大道蓝玉四街9号四号厂房第四层A区	113.533	23.0638
747	广州瑞姆节能设备有限公司	2005-05-17	2023-11-07	M	73	研究和试验发展	广东省	广州市	白云区	广州市白云区钟落潭镇竹料大道58栋后座1号之三	113.37	23.3712
748	广州睿捷网络科技有限公司	2003-11-11	2022-08-25	M	73	研究和试验发展	广东省	广州市	越秀区	广州市越秀区中山三路33号B塔3805房（仅限办公用途）	113.289	23.1317
749	广州赛福节能科技发展有限公司	2007-07-17	2011-03-31	M	73	研究和试验发展	广东省	广州市	黄埔区	广州高新技术产业开发区科学城科学大道182号C2区附楼第2层205、206单元	113.442	23.166
750	广州三川控制系统工程设备有限公司	1993-07-22	2023-10-18	E	48	土木工程建筑业	广东省	广州市	黄埔区	广州市黄埔区南云五路11号光正科技产业园A栋401	113.462	23.1517
751	广州三孚新材料科技股份有限公司（曾用名：广州三孚新材料科技有限公司）	2009-04-13	2023-08-14	C	35	专用设备制造业	广东省	广州市	增城区	广州市中新广州知识城凤凰三横路57号	113.506	23.3944
752	广东阿尔创通信技术股份有限公司（曾用名：广州市阿尔创通信技术有限公司）	2004-12-14	2023-05-19	M	73	研究和试验发展	广东省	广州市	天河区	广州市天河区建工路8号五楼501-505房	113.379	23.1299
753	广州市傲派自动化科技有限公司（曾用名：广州市傲派自动化设备有限公司）	2007-07-25	2023-09-15	M	73	研究和试验发展	广东省	广州市	番禺区	广州市番禺区石壁街汉溪大道西283号创越大厦东塔2201房	113.284	22.9953
754	广州市奥吉斯新材料有限公司	2004-02-03	2014-01-20	C	29	橡胶和塑料制品业	广东省	广州市	白云区	广州市白云区神山雄郭路138号	113.201	23.3423
755	广州市澳锝林电子有限公司	2008-04-02	2021-12-14	C	39	计算机、通信和其他电子设备制造业	广东省	广州市	花都区	广州市花都区花山镇商业大道241-1号（仅限办公用途）（不可作厂房使用）	113.264	23.404
756	广州市澳键丰泽生物科技股份有限公司（曾用名：广州市澳键丰泽生物科技有限公司）	2000-09-04	2023-10-11	M	73	研究和试验发展	广东省	广州市	黄埔区	广州经济技术开发区东区宏明路139号	113.553	23.1204
757	广州市邦尔福鞋材有限公司	2006-05-24	2016-11-07	C	19	皮革、毛皮、羽毛及其制品和制鞋业	广东省	广州市	白云区	广州市白云区太和镇南村蓝穗大道6号	113.303	23.2989
758	广东博兴新材料科技股份有限公司（曾用名：广州市博兴化工科技有限公司）	2007-02-02	2023-10-25	M	73	研究和试验发展	广东省	广州市	海珠区	广州市海珠区新港东路海诚东街8号801房（仅限办公用途）	113.363	23.1044
759	广州市电力工程设计院有限公司	1999-04-12	2023-05-24	M	74	专业技术服务业	广东省	广州市	海珠区	广州市海珠区琶洲大道188号2101房、2201房（仅限办公）	113.356	23.1064
760	广州市倍尔康医疗器械有限公司（曾用名：广州市番禺金鑫宝电子有限公司）	2000-01-11	2022-12-12	C	35	专用设备制造业	广东省	广州市	南沙区	广州市南沙区大岗镇环镇西路38号（生产大楼1）	113.411	22.8081
761	广东粤新海洋工程装备股份有限公司（曾用名：广州市番禺粤新造船有限公司）	2000-09-04	2023-08-03	C	35	专用设备制造业	广东省	广州市	南沙区	广州市南沙区大岗镇潭洲马前村	113.389	22.7864
762	广州市格宁电气有限公司	2002-05-10	2023-10-18	C	38	电气机械和器材制造业	广东省	广州市	天河区	广州市天河区广汕二路602号之一首层自编107房	113.421	23.1967
763	广东达志化学科技有限公司（曾用名：广州市海科顺表面处理有限公司）	2002-07-09	2019-12-10	C	26	化学原料和化学制品制造业	广东省	广州市	黄埔区	广州市黄埔区永和经济区田园东路2号105	113.579	23.1862
764	广州市浩图信息科技有限公司	2007-08-23	2021-04-16	M	73	研究和试验发展	广东省	广州市	黄埔区	广州高新技术产业开发区科学城科珠路232号2栋自编401房	113.445	23.1763
765	广州市和兴隆食品科技股份有限公司（曾用名：广州市和兴隆食品科技有限公司）	2008-12-22	2018-06-28	M	73	研究和试验发展	广东省	广州市	白云区	广州市白云区人和镇广花三路338号	113.248	23.2994
766	广州市恒盛建设集团有限公司（曾用名：广州市恒盛建设工程有限公司）	2000-03-31	2023-08-04	E	47	房屋建筑业	广东省	广州市	白云区	广州市白云区科创路17号15层	113.346	23.3062
767	广州市宏通机器制造有限公司	2005-04-08	2020-05-18	C	33	金属制品业	广东省	广州市	荔湾区	广州市荔湾区葵蓬路169号之一	113.221	23.0926
768	广州市华瑞保环保科技有限公司	2005-11-15	2020-03-02	M	73	研究和试验发展	广东省	广州市	天河区	广州市天河区海安路13号之二2705房（仅限办公）（不可作厂房使用）	113.347	23.1304
769	广州市环境卫生机械设备厂	1987-09-05	2023-07-31	C	35	专用设备制造业	广东省	广州市	白云区	广州市白云区广花三路466号	113.245	23.3101
770	广州东湾医疗设备有限公司（曾用名：广州市惠润医疗设备有限公司）	2002-04-29	2021-02-02	C	35	专用设备制造业	广东省	广州市	白云区	广州市白云区广州民营科技园北太路1627号敏捷科创中心1号楼3层320号	113.34	23.3018
771	广州市嘉鸿信息技术有限公司	2004-04-13	2016-05-19	I	65	软件和信息技术服务业	广东省	广州市	海珠区	广州市海珠区工业大道997号嘉鸿花园嘉洋阁6楼11房（仅作办公用途）	113.298	23.0727
772	广州市建筑机械施工有限公司	1960-01-01	2023-08-28	E	47	房屋建筑业	广东省	广州市	黄埔区	广州市黄埔区黄埔东路1080号（自编1栋）26楼	113.475	23.1013
773	广州市建筑科学研究院集团有限公司（曾用名：广州市建筑科学研究院有限公司）	2008-09-18	2023-05-22	M	73	研究和试验发展	广东省	广州市	白云区	广州市白云区白云大道北833号	113.303	23.2313
774	广州市捷众智能科技有限公司（曾用名：广州市捷众科贸有限公司）	1999-12-16	2020-05-15	C	39	计算机、通信和其他电子设备制造业	广东省	广州市	黄埔区	广州高新技术产业开发区玉树工业园敬业三街7号D栋403房	113.439	23.1614
775	广州市锦路电气设备有限公司	2004-03-02	2022-11-08	C	39	计算机、通信和其他电子设备制造业	广东省	广州市	天河区	广州市天河区中山大道路89号C211房（本住所限写字楼功能）（不可作厂房使用）	113.323	23.1288
776	广州市京龙工程机械有限公司	1996-12-04	2021-05-13	E	49	建筑安装业	广东省	广州市	花都区	广州市花都区花都大道东598号之三301	113.338	23.4413
777	广东九安智能科技股份有限公司（曾用名：广州市九安光电技术股份有限公司）	2007-01-15	2023-08-11	C	39	计算机、通信和其他电子设备制造业	广东省	广州市	番禺区	广州市番禺区大石街山西村西侧（2号厂房）2栋一层、二层	113.311	23.0249
778	广州市凯昌电子有限公司	2003-08-07	2023-07-21	C	39	计算机、通信和其他电子设备制造业	广东省	广州市	番禺区	广州市番禺区石基镇文边工业区	113.418	22.9845
779	广州市凯诺生物科技有限公司	2003-03-30	2015-12-22	M	73	研究和试验发展	广东省	广州市	黄埔区	广州市经济技术开发区广州国际企业孵化器A区A610、A611之一房	113.454	23.1685
780	广州市科密办公科技有限公司（曾用名：广州市科密化学有限公司）	2005-01-19	2015-09-01	C	26	化学原料和化学制品制造业	广东省	广州市	增城区	广州市增城朱村街丫布路口	113.818	23.2666
781	广州市科密科技发展有限公司	2001-08-15	2014-11-28	I	65	软件和信息技术服务业	广东省	广州市	黄埔区	广州高新技术产业开发区科汇三街10号401房	113.443	23.1743
782	广州市乐得瑞科技有限公司	2000-10-16	2022-12-07	C	39	计算机、通信和其他电子设备制造业	广东省	广州市	天河区	广州市天河区建业路华翠街54-58号202之203房（不可作厂房使用）	113.375	23.1312
783	广州市立秋电子科技有限公司	2003-12-29	2020-10-10	I	64	互联网和相关服务	广东省	广州市	天河区	广州市天河区华观路1934号（自编A2栋）715房	113.412	23.1727
784	广州市亮智信息科技有限公司	2008-05-08	2014-06-26	I	64	互联网和相关服务	广东省	广州市	番禺区	广州市番禺区小谷围街中二横路22号B611-B612	113.401	23.067
785	广州市灵通新技术有限公司	1994-06-09	2023-02-17	M	75	科技推广和应用服务业	广东省	广州市	越秀区	广州市越秀区先烈中路100号大院23栋之一自编111房	113.306	23.1455
786	广州明森科技股份有限公司（曾用名：广州市明森机电设备有限公司）	2004-04-12	2023-05-26	C	35	专用设备制造业	广东省	广州市	天河区	广州市天河区广汕一路500号1-5栋	113.388	23.1971
787	广州市铭成橡塑科技有限公司	2007-05-25	2023-07-07	C	29	橡胶和塑料制品业	广东省	广州市	花都区	广州市花都区狮岭镇新庄工业区	113.15	23.4576
788	广州市铭汉科技股份有限公司（曾用名：广州市铭汉电子科技有限公司）	1999-03-18	2023-07-14	M	73	研究和试验发展	广东省	广州市	天河区	广州市天河区珠江新城华穗路174号星辰大厦东塔1705房（本住所仅限写字楼功能）	113.326	23.1239
789	广州市南方科能信息产业有限公司	1997-10-29	2023-09-13	M	73	研究和试验发展	广东省	广州市	天河区	广州市天河区五山路246、248、250号1501自编08-10室	113.353	23.1495
790	广州市千城计算机科技有限公司	2005-08-01	2022-10-28	M	73	研究和试验发展	广东省	广州市	海珠区	广州市海珠区建基路66号2501自编2503-2504室	113.294	23.1057
791	广州市千钧网络科技有限公司	2004-10-28	2022-12-19	I	64	互联网和相关服务	广东省	广州市	天河区	广州市天河区华夏路10号富力中心20楼02单元	113.328	23.1233
792	广州市水晶球信息技术有限公司	2015-11-03	2021-08-13	M	73	研究和试验发展	广东省	广州市	天河区	广州市天河区育新街18号3单元409-03（仅限办公）	113.393	23.176
793	广州市思普达电子科技有限公司	2004-09-13	2014-08-06	I	65	软件和信息技术服务业	广东省	广州市	番禺区	广州市番禺区石楼镇官桥村创启路63号创新科技园创新一号楼B座B4-2	113.466	22.9832
794	广州市四月天信息科技有限公司	2005-07-26	2023-05-19	I	65	软件和信息技术服务业	广东省	广州市	天河区	广州市天河区科韵路16号自编1栋801之18房	113.378	23.1314
795	广州市穗凌电器有限公司	2003-08-21	2022-05-07	C	38	电气机械和器材制造业	广东省	广州市	白云区	广州市白云区钟落潭镇广陈路929号102铺	113.428	23.3668
796	广州市索爱数码科技有限公司	2005-06-02	2018-04-19	C	39	计算机、通信和其他电子设备制造业	广东省	广州市	花都区	广州市花都区新华街马溪村车城大道3号B幢	113.145	23.3712
797	广州市泰基工程技术有限公司	2001-03-22	2016-08-19	E	50	建筑装饰、装修和其他建筑业	广东省	广州市	天河区	广州市天河区天河路377号5层503、504房（仅限办公用途）	113.337	23.1399
798	广州市天赐三和环保工程有限公司	2001-10-05	2021-08-24	N	77	生态保护和环境治理业	广东省	广州市	越秀区	广州市越秀区寺右新马路115号五羊新城广场18楼（不可作厂房使用）	113.32	23.1263
799	广州市天奕信息技术股份有限公司（曾用名：广州市天奕信息科技有限公司）	2004-09-02	2022-01-27	I	65	软件和信息技术服务业	广东省	广州市	番禺区	广州市番禺区东环街番禺大道北555号天安总部中心15号楼801、802	113.376	22.9871
800	广州市微尔数码科技有限公司	2003-08-04	2015-11-04	C	39	计算机、通信和其他电子设备制造业	广东省	广州市	番禺区	广州市番禺区大石街植村中心岗（土名）1栋3楼、4楼之1	113.33	23.0204
801	广州信联智通实业股份有限公司（曾用名：广州市信联智通实业有限公司）	2001-02-15	2023-07-24	C	40	仪器仪表制造业	广东省	广州市	黄埔区	广州市黄埔区云埔工业区东诚片东鸣路1号	113.551	23.1375
802	广州市兴世机械制造有限公司	1999-10-27	2021-08-12	C	35	专用设备制造业	广东省	广州市	番禺区	广州市番禺区钟村街钟汉路11号	113.333	22.9875
803	广州市旭龙条码设备有限公司	2016-11-10	2023-07-20	F	51	批发业	广东省	广州市	黄埔区	广州市黄埔区新业路76号C栋501房	113.574	23.2099
804	广州市旭昇电子有限公司	2003-03-07	2019-11-25	C	39	计算机、通信和其他电子设备制造业	广东省	广州市	番禺区	广州市番禺区石楼镇潮田工业区华山路11号	113.484	22.9649
805	广州市夜太阳舞台灯光音响设备有限公司	2004-08-05	2020-12-22	C	38	电气机械和器材制造业	广东省	广州市	花都区	广州市花都区港口工业区大明街1号之一	113.153	23.3627
806	广州市易纬电子有限公司	2003-08-01	2023-10-17	C	39	计算机、通信和其他电子设备制造业	广东省	广州市	黄埔区	广州高新技术产业开发区科学城科汇四街1号401房	113.444	23.1734
807	广州市毅航互联通信股份有限公司（曾用名：广州市毅航通信技术有限公司）	2006-04-24	2020-07-24	M	73	研究和试验发展	广东省	广州市	天河区	广州市天河区中山大道路89号16层北13-17房（仅限办公用途，不可作厂房使用）	113.369	23.1304
808	广州市宇宝数码科技制品有限公司	2003-08-11	2019-09-19	C	39	计算机、通信和其他电子设备制造业	广东省	广州市	白云区	广州市白云区江高镇凤翔南路58号	113.222	23.2612
809	广州市元镁计算机科技有限公司	2007-11-25	2022-03-09	M	73	研究和试验发展	广东省	广州市	越秀区	广州市越秀区环市西路202号之三第三层306铺	113.266	23.1515
810	章和技术（广州）有限公司（曾用名：广州市章和电气设备有限公司）	2000-05-18	2022-04-29	I	65	软件和信息技术服务业	广东省	广州市	天河区	广州市天河区高普路1025号701室（仅限办公）	113.419	23.1788
811	广州市至润油脂食品工业有限公司	2003-06-09	2022-12-26	C	13	农副食品加工业	广东省	广州市	番禺区	广州市番禺区新造镇白贤堂临江工业区	113.419	23.036
812	广州广电穗通科技有限公司（曾用名：广州穗通金融服务有限公司）	2008-12-30	2023-10-18	I	65	软件和信息技术服务业	广东省	广州市	天河区	广州市天河区高唐路232号（自编穗通大楼）	113.411	23.1705
813	广州太普软件科技有限公司	2005-08-25	2023-01-09	I	65	软件和信息技术服务业	广东省	广州市	天河区	广州市天河区高普路1023号1楼101室自编23号（仅限办公）	113.42	23.179
814	广州泰阳能源科技有限公司	2006-09-29	2023-07-26	M	73	研究和试验发展	广东省	广州市	黄埔区	广州市黄埔区开泰大道28号801房	113.476	23.1687
815	广州天诚伟业通信科技有限公司	2009-06-11	2021-10-18	I	65	软件和信息技术服务业	广东省	广州市	黄埔区	广州市黄埔区蓝玉四街9号2号厂房南407房	113.533	23.0642
816	广州铁路科开制造有限公司（曾用名：广州铁路经济技术开发总公司广州电务工厂）	1981-11-19	2023-06-02	C	37	铁路、船舶、航空航天和其他运输设备制造业	广东省	广州市	荔湾区	广州市荔湾区石围塘北街67号	113.234	23.113
817	广州同辰计算机科技有限公司	2003-03-17	2022-05-12	I	65	软件和信息技术服务业	广东省	广州市	天河区	广州市天河区天府路239-257号320自编01	113.373	23.1403
818	广州万迅电脑软件有限公司	1998-10-12	2023-07-17	I	65	软件和信息技术服务业	广东省	广州市	越秀区	广州市越秀区越华路112号1401房（部位：自编03A1、03A2、03A3）	113.274	23.1361
819	广州威尔宝酒店设备有限公司	2001-07-25	2023-03-27	C	33	金属制品业	广东省	广州市	番禺区	广州市番禺区沙头街汀根村工业二区八号	113.371	23.0024
820	广州薇美姿个人护理用品有限公司	2006-03-27	2016-12-27	C	41	其他制造业	广东省	广州市	天河区	广州市天河区建中路64、66号西701	113.377	23.1287
821	广州伟度计算机科技有限公司	2004-07-19	2023-05-18	I	65	软件和信息技术服务业	广东省	广州市	黄埔区	广州市黄埔区科学大道48号612-616房	113.436	23.1706
822	广州玺明机械科技有限公司（曾用名：广州玺明机械有限公司）	2000-01-12	2023-03-27	C	35	专用设备制造业	广东省	广州市	白云区	广州市白云区良田镇良沙路陈洞段1038号	113.458	23.3338
823	广州像素数据技术股份有限公司（曾用名：广州像素数据技术开发有限公司）	1998-08-07	2023-09-22	M	73	研究和试验发展	广东省	广州市	海珠区	广州市海珠区海联路25号二楼208房（不可作厂房使用）（仅限办公用途）	113.293	23.1083
824	广州鑫南数控科技有限公司	2007-09-26	2019-11-05	C	38	电气机械和器材制造业	广东省	广州市	南沙区	广州市南沙区南沙街大涌路62号（临时经营场所）	113.558	22.7702
825	广州星辉电子制造有限公司	1990-11-21	2018-12-28	C	38	电气机械和器材制造业	广东省	广州市	番禺区	广州市番禺区石基镇工业区	113.39	22.9438
826	广州依利安达微通科技有限公司	1999-08-23	2023-01-09	C	39	计算机、通信和其他电子设备制造业	广东省	广州市	黄埔区	广州经济技术开发区临江路3号3楼	113.534	23.0737
827	广州亿阳信息技术有限公司	2007-04-09	2022-10-11	M	73	研究和试验发展	广东省	广州市	天河区	广州市天河区黄村路4号（部位：3101）	113.414	23.1301
828	广州易而达科技股份有限公司（曾用名：广州易迩达电子有限公司）	2007-12-20	2022-06-28	C	39	计算机、通信和其他电子设备制造业	广东省	广州市	南沙区	广州市南沙区黄阁镇吉盛路2号（厂房A）	113.521	22.8371
829	广东易积网络股份有限公司（曾用名：广州易积网络科技有限公司）	2008-04-25	2022-05-07	I	64	互联网和相关服务	广东省	广州市	天河区	广州市天河区建工路4号佳都科技大厦2号楼一楼自编A228	113.379	23.1307

## Sheet: 2012-2014
Number	Company Name	Date of Establishment	Date of Approval	Industry Code (Category)	Industry Code (Major Category)	Industry Sector	Province	City	District	Address	Longitude	Latitude
1	广州市胜特建筑科技开发有限公司	1998-09-18	2018-08-13	E	50	建筑装饰、装修和其他建筑业	广东省	广州市	白云区	广州市白云区石井镇横沙村金沙洲路西就街11号	113.214	23.1609
2	广州市盛通建设工程质量检测有限公司	2006-04-12	2023-12-07	M	74	专业技术服务业	广东省	广州市	越秀区	广州市越秀区天河路34号4楼	113.32	23.1397
3	广州市万世德智能装备科技有限公司（曾用名：广州市万世德包装机械有限公司）	2003-05-15	2018-02-26	C	34	通用设备制造业	广东省	广州市	花都区	广州市花都区新华镇华兴工业区	113.242	23.3528
4	广州市唯康通信技术有限公司	2002-12-24	2023-12-12	C	39	计算机、通信和其他电子设备制造业	广东省	广州市	天河区	广州市天河区科新路9号D栋201-1室(仅限办公)	113.388	23.1278
5	广州市芯科电子科技有限公司	2006-01-13	2022-07-13	C	39	计算机、通信和其他电子设备制造业	广东省	广州市	花都区	广州市花都区花东镇京塘村马岭庄11号103（可作厂房使用）	113.432	23.4116
6	广州市新欧机械有限公司	2006-08-11	2021-10-20	C	34	通用设备制造业	广东省	广州市	黄埔区	广州市萝岗区云庆路11号D栋厂房	113.541	23.1408
7	广州市信征汽车零件有限公司	2001-04-03	2023-09-28	C	36	汽车制造业	广东省	广州市	黄埔区	广州市黄埔区新业路46号自编22栋101、201房	113.573	23.1955
8	广州市旭峰电子产品有限公司	2006-06-27	2023-05-09	C	39	计算机、通信和其他电子设备制造业	广东省	广州市	番禺区	广州市番禺区大龙街茶东村庚辉大街一号之一	113.422	22.9612
9	广州市旭升环保工程有限公司	2009-10-23	2022-12-20	E	50	建筑装饰、装修和其他建筑业	广东省	广州市	番禺区	广州市番禺区桥南街草河工业区北十一排1号首层101	113.408	22.9194
10	广州市玄武无线科技股份有限公司（曾用名：广州市玄武无线科技有限公司）	2010-11-02	2023-10-16	M	73	研究和试验发展	广东省	广州市	天河区	广州市天河区高普路1021号501室6383号	113.419	23.1792
11	广州市亿福迪医疗科技有限公司（曾用名：广州市亿福迪医疗器械有限公司）	2005-02-23	2021-09-24	C	27	医药制造业	广东省	广州市	黄埔区	广州市黄埔区科学城玉树工业园敬业三街2号J栋602房	113.44	23.1594
12	广州市银科电子有限公司	2006-11-14	2023-10-07	M	73	研究和试验发展	广东省	广州市	黄埔区	广州市黄埔区科珠路232号3栋201房自编201-1	113.445	23.1763
13	广州市优伟家居用品有限公司	2004-12-20	2021-12-09	C	17	纺织业	广东省	广州市	花都区	广州市花都区北兴镇北兴工业园	113.428	23.431
14	广州市远能物流自动化设备科技有限公司	2008-07-17	2018-09-03	C	35	专用设备制造业	广东省	广州市	花都区	广州市花都区新华街毕村北路14号之1B区	113.183	23.4085
15	广东中设智控科技股份有限公司（曾用名：广州市正泰商业数据有限公司）	1999-09-07	2023-08-03	I	64	互联网和相关服务	广东省	广州市	黄埔区	广州市黄埔区伴河路136号1403房	113.516	23.1619
16	广州市中崎商业机器股份有限公司（曾用名：广州市中崎商业机器有限公司）	2003-05-12	2023-03-30	C	39	计算机、通信和其他电子设备制造业	广东省	广州市	黄埔区	广州市萝岗区云骏路17号自编五栋	113.545	23.1568
17	广州中新汽车零部件有限公司（曾用名：广州市中新塑料有限公司）	2002-02-04	2022-08-17	C	36	汽车制造业	广东省	广州市	增城区	广州市增城中新镇中福北路３号	113.639	23.3011
18	广州珠江建设发展有限公司（曾用名：广州市住宅建设发展有限公司）	1957-11-18	2024-03-12	E	47	房屋建筑业	广东省	广州市	越秀区	广州市越秀区环市东路476号之一10-17层	113.312	23.1403
19	广州首易信息技术有限公司	2001-07-06	2021-10-12	M	73	研究和试验发展	广东省	广州市	番禺区	广州市番禺区南村镇汉溪大道东387号1424-1426房	113.356	23.0127
20	广州水泵厂有限公司（曾用名：广州水泵厂）	1976-03-10	2020-05-08	C	34	通用设备制造业	广东省	广州市	越秀区	广州市越秀区东风东路733（1）号自编一楼13自编之四十三（仅限办公）	113.285	23.1126
21	广州舜松新能源科技有限公司	2009-02-25	2022-06-14	M	74	专业技术服务业	广东省	广州市	荔湾区	广州市荔湾区桥中街桥中中路213－217号自编J1幢	113.225	23.1392
22	广州思唯奇计算机科技有限公司	2005-09-08	2022-12-06	M	73	研究和试验发展	广东省	广州市	黄埔区	广州市黄埔区科丰路266号201房	113.474	23.1669
23	广州天赋人财光电科技有限公司	2006-09-25	2023-08-03	M	73	研究和试验发展	广东省	广州市	天河区	广州市天河区高普路95号B栋201、401房	113.423	23.1896
24	广州兰石技术开发有限公司（曾用名：广州天河兰石技术开发有限公司）	1993-10-09	2023-10-27	M	73	研究和试验发展	广东省	广州市	黄埔区	广州市黄埔区黄埔大道东974号503房	113.476	23.1017
25	广州通泽机械有限公司	2007-09-26	2022-08-31	C	39	计算机、通信和其他电子设备制造业	广东省	广州市	花都区	广州市花都区赤坭镇培正大道18号	113.102	23.4018
26	广州广电五舟科技股份有限公司（曾用名：广州五舟信息科技有限公司）	2008-07-16	2023-09-28	M	73	研究和试验发展	广东省	广州市	黄埔区	广州市黄埔区开源大道11号C2栋401室	113.502	23.1594
27	广州中滔环保技术发展集团有限公司（曾用名：广州新滔水质净化有限公司）	2003-09-28	2023-10-18	N	77	生态保护和环境治理业	广东省	广州市	增城区	广州增城市新塘镇西洲村南蛇湾	113.588	23.1071
28	广州新粤交通技术有限公司	2008-09-27	2024-01-10	M	73	研究和试验发展	广东省	广州市	黄埔区	广州市萝岗区科学大道中99号科汇三街5号101-1及201-1（仅作办公用途）	113.442	23.1745
29	广州鑫肽生物蛋白股份有限公司	2006-07-05	2018-04-13	M	73	研究和试验发展	广东省	广州市	白云区	广州市白云区钟落潭镇广龙路12号	113.404	23.3824
30	迅天软件有限公司（曾用名：广州迅天软件有限公司）	2004-01-09	2020-01-09	I	65	软件和信息技术服务业	广东省	广州市	天河区	广州市天河区思成路1号4层410号房	113.423	23.1784
31	广州雅纯化妆品制造有限公司	2004-12-29	2020-07-29	C	26	化学原料和化学制品制造业	广东省	广州市	白云区	广州市白云区人和秀水白米工业园2号	113.308	23.3224
32	广州研创生物技术发展有限公司	2006-04-07	2022-09-26	M	73	研究和试验发展	广东省	广州市	黄埔区	广州市黄埔区揽月路3号F栋F310、305房	113.453	23.1675
33	广州要玩娱乐网络技术股份有限公司（曾用名：广州要玩娱乐网络技术有限公司）	2009-12-01	2024-04-07	M	73	研究和试验发展	广东省	广州市	天河区	广州市天河区中山大道西89号A栋5层517-518号	113.363	23.1413
34	广州亦云信息技术股份有限公司（曾用名：广州亦云信息技术有限公司）	2009-07-13	2023-06-02	I	65	软件和信息技术服务业	广东省	广州市	海珠区	广州市海珠区新港西路135号大院园西区705号楼705-713房	113.298	23.0991
35	广州茵绿环境科技发展有限公司	1994-06-21	2017-05-18	M	74	专业技术服务业	广东省	广州市	越秀区	广州市越秀区东华西路92号丽华大厦2003房（仅限办公使用）*	113.286	23.1284
36	广州优亿信息科技有限公司	2008-08-16	2020-09-20	I	65	软件和信息技术服务业	广东省	广州市	天河区	广州市天河区五山路246、248、250号1802自编03、04、05部位	113.353	23.1495
37	广州驭风旭铝铸件有限公司	2007-02-12	2023-08-09	C	36	汽车制造业	广东省	广州市	增城区	广州市增城区仙宁路498号	113.711	23.1783
38	广州粤研智能装备股份有限公司（曾用名：广州粤研液压机电有限公司）	1995-06-20	2016-04-26	C	34	通用设备制造业	广东省	广州市	番禺区	广州市番禺区南村镇官堂村华南新城路2号厂房	113.357	23.0268
39	广州云图信息科技有限公司	2010-10-19	2021-04-29	M	73	研究和试验发展	广东省	广州市	天河区	广州市天河区大岗北新建路9号B1栋305房（仅限办公）	113.403	23.1369
40	广州正虹环境科技有限公司（曾用名：广州正虹科技发展有限公司）	2000-07-25	2021-07-19	M	75	科技推广和应用服务业	广东省	广州市	黄埔区	广州市黄埔区科学大道182号C3栋1001房（仅限办公）	113.461	23.172
41	广州致仪计算机软件科技有限公司	2008-11-10	2020-04-26	F	52	零售业	广东省	广州市	黄埔区	广州市黄埔区彩频路11号315房（仅限办公）	113.443	23.1679
42	广州中奥嘉信息技术有限公司	2006-03-06	2022-07-27	I	65	软件和信息技术服务业	广东省	广州市	天河区	广州市天河区龙口西路100号2楼全层（部位：自编12单元）	113.343	23.1432
43	广州中科建禹环保有限公司（曾用名：广州中科建禹水处理技术有限公司）	2001-08-02	2021-11-04	N	76	水利管理业	广东省	广州市	黄埔区	广州高新技术产业开发区科学城科研路18号	113.449	23.1769
44	广东中网电力有限公司（曾用名：广州中网电力工程设计有限公司）	2009-08-27	2024-03-28	D	44	电力、热力生产和供应业	广东省	广州市	天河区	广州市天河区花城大道18号1901房之自编号19F03B单元	113.324	23.1249
45	广州卓炎软件技术有限公司	2005-02-01	2024-01-08	I	65	软件和信息技术服务业	广东省	广州市	黄埔区	广州市黄埔区科学城科珠路203号1107房	113.443	23.1702
46	明珠电气股份有限公司（曾用名：明珠电气有限公司）	2009-04-29	2022-11-09	C	38	电气机械和器材制造业	广东省	广州市	番禺区	广州市番禺区东环街东环路118号	113.385	22.9578
47	南方电网科学研究院有限责任公司	2010-11-05	2022-08-18	M	73	研究和试验发展	广东省	广州市	黄埔区	广东省广州市萝岗区科学城科翔路11号J1栋3、4、5楼及J3栋3楼	113.447	23.1784
48	日立电梯电机（广州）有限公司	2004-12-29	2023-11-02	C	38	电气机械和器材制造业	广东省	广州市	黄埔区	广州高新技术产业开发区科学城科林路1号	113.447	23.1492
49	赛业（广州）生物科技有限公司	2006-02-16	2022-08-03	M	73	研究和试验发展	广东省	广州市	黄埔区	广州市黄埔区神舟路288号D栋201房	113.441	23.1836
50	威凯检测技术有限公司	2010-08-30	2022-06-23	M	74	专业技术服务业	广东省	广州市	黄埔区	广州市萝岗区天泰一路3号	113.469	23.1676
51	广州易达包装设备有限公司（曾用名：易达（广州）包装设备有限公司）	2006-11-08	2022-06-24	C	39	计算机、通信和其他电子设备制造业	广东省	广州市	黄埔区	广州市经济技术开发区永和经济区黄旗山路16号3楼	113.548	23.2119
52	卓高泰（广州）材料科技有限公司（曾用名：卓高泰（广州）包装有限公司）	2006-07-04	2021-11-19	C	29	橡胶和塑料制品业	广东省	广州市	黄埔区	广州经济技术开发区永和经济区禾丰四街9号	113.587	23.2211
53	安维思电子科技（广州）有限公司	2005-06-06	2019-09-04	M	73	研究和试验发展	广东省	广州市	黄埔区	广州高新技术产业开发区揽月路8号自编一栋416房	113.452	23.1681
54	广东创能科技股份有限公司（曾用名：广东创能科技有限公司）	2000-01-12	2024-03-22	I	64	互联网和相关服务	广东省	广州市	天河区	广东省广州市天河区软件路15号5楼501室	113.42	23.1773
55	广东第吉尔电子科技有限公司	2023-03-03	2023-12-22	M	73	研究和试验发展	广东省	广州市	黄埔区	广州高新技术产业开发区科学城揽月路80号科技创新基地D区第三层305单元	113.453	23.1689
56	广东广新信息产业股份有限公司（曾用名：广东广新信息技术产业发展有限公司）	2010-06-25	2022-10-10	C	39	计算机、通信和其他电子设备制造业	广东省	广州市	海珠区	广州市海珠区新港东路1000号保利世界贸易中心写字楼东塔15层	113.373	23.1033
57	广东广信通信服务有限公司	2000-12-27	2023-11-14	I	65	软件和信息技术服务业	广东省	广州市	天河区	广州市越秀区东湖路永胜东街27号首层	113.295	23.1253
58	广东华之源信息工程有限公司	2003-09-26	2023-11-10	C	39	计算机、通信和其他电子设备制造业	广东省	广州市	黄埔区	广州市黄埔区开泰大道30号之一1701房	113.48	23.1688
59	广东汇安恒达管理顾问有限公司	2009-03-20	2021-12-21	L	72	商务服务业	广东省	广州市	天河区	广州市天河区华夏路28号1408房（仅限办公）	113.329	23.1309
60	广东佳博电子科技有限公司	2005-01-28	2019-03-08	M	75	科技推广和应用服务业	广东省	广州市	黄埔区	广州经济技术开发区东区骏业路132号	113.533	23.1424
61	广东建筑消防设施检测中心有限公司	1999-08-26	2024-02-29	M	74	专业技术服务业	广东省	广州市	天河区	广东省广州市天河区天河路天河体育中心内街配电房二层	113.332	23.1432
62	广东隆赋药业有限公司	2009-12-22	2014-05-27	C	27	医药制造业	广东省	广州市	白云区	广州市白云区嘉禾鹤边细鹏岭路200号	113.278	23.2361
63	广东能达公路养护股份有限公司（曾用名：广东能达高等级公路维护有限公司）	1999-08-16	2021-12-28	E	48	土木工程建筑业	广东省	广州市	越秀区	广东省广州市越秀区东风中路389号2001房	113.277	23.1378
64	广东纽恩泰新能源科技发展有限公司	2008-12-01	-	C	34	通用设备制造业	广东省	广州市	增城区	广州市增城新塘镇创优路125号（增城经济技术开发区核心区内）	113.636	23.1939
65	广东省装饰有限公司	1988-08-05	2023-08-10	E	50	建筑装饰、装修和其他建筑业	广东省	广州市	海珠区	广东省广州市海珠区石榴岗路10号生物工程大厦6楼	113.338	23.0984
66	广东先朗照明有限公司	1995-11-13	2024-03-14	C	38	电气机械和器材制造业	广东省	广州市	白云区	广东省广州市白云区江高镇鹤云路11号	113.221	23.2731
67	广东粤铁科技有限公司（曾用名：广东粤铁电子科技有限公司）	2006-04-03	2023-02-13	I	65	软件和信息技术服务业	广东省	广州市	黄埔区	广州市黄埔区科汇二街15号401房（仅限办公）	113.441	23.1738
68	广州爱保农生物科技有限公司（曾用名：广州爱保农饲料有限公司）	2008-09-16	2024-03-13	M	73	研究和试验发展	广东省	广州市	白云区	广州市白云区北太路1633号广州民营科技园科盛路8号配套服务大楼5层A505-24房	113.342	23.302
69	广州佰能信息科技有限公司	2008-12-03	2018-08-08	I	65	软件和信息技术服务业	广东省	广州市	番禺区	广州市番禺区南村镇兴南大道483号二层A1	113.373	23.0221
70	广州宝兴生物科技有限公司	2002-08-28	2021-06-03	M	73	研究和试验发展	广东省	广州市	黄埔区	广州市黄埔区科学大道97号434房	113.441	23.1725
71	广州贝龙环保产业科技股份有限公司（曾用名：广州贝龙环保热力设备股份有限公司）	1995-10-24	2023-09-27	M	73	研究和试验发展	广东省	广州市	黄埔区	广州市经济技术开发区禾丰路63号	113.574	23.2161
72	广州布谷信息科技有限公司	2009-11-26	2023-04-04	M	73	研究和试验发展	广东省	广州市	海珠区	广州市天河区五山路246、248、250号金山大厦802自编02-03	113.353	23.1497
73	广州达元食品安全技术有限公司	2005-03-09	2022-07-28	M	73	研究和试验发展	广东省	广州市	黄埔区	广州高新技术产业开发区科学城开源大道11号A1栋第六层602房	113.502	23.1594
74	广州大华仁盛铝合金管业有限公司	2009-09-08	2014-06-16	C	36	汽车制造业	广东省	广州市	白云区	广州市白云区北太路1633号民营科技园东门外自编1号	113.341	23.3015
75	广州东润数据股份有限公司	2003-09-10	2014-01-23	L	72	商务服务业	广东省	广州市	越秀区	广州市越秀区环市东路472号19楼自编E、F房	113.311	23.1403
76	广州歌华网络科技发展有限公司	2006-11-13	2024-03-13	I	65	软件和信息技术服务业	广东省	广州市	天河区	广州市天河区黄埔大道西平云路163号广电平云广场AB塔自编之B塔1302单元	113.358	23.1246
77	广州观景文化科技有限公司（曾用名：广州观景信息技术有限公司）	2010-08-20	2023-04-12	M	73	研究和试验发展	广东省	广州市	荔湾区	广州市荔湾区芳村大道东200号74栋（部位：6101房）	113.25	23.1018
78	广州桦普信息技术有限公司	2005-04-27	2018-04-11	I	65	软件和信息技术服务业	广东省	广州市	天河区	广州市天河区珠江新城华明路13号2603房	113.323	23.1287
79	广州汇隽电力工程设计有限公司	2006-12-05	2023-12-13	E	48	土木工程建筑业	广东省	广州市	番禺区	广州市番禺区市桥街东兴路168号综合楼	113.389	22.9347
80	广州惠威电声科技股份有限公司（曾用名：广州惠威电器有限公司）	1997-06-24	2022-08-02	C	39	计算机、通信和其他电子设备制造业	广东省	广州市	南沙区	广州市南沙区东涌镇三沙公路13号	113.484	22.8869
81	广州莱迪光电股份有限公司	2010-02-08	2022-09-29	C	38	电气机械和器材制造业	广东省	广州市	黄埔区	广州市高新技术产业开发区科学城开源大道188号	113.518	23.1632
82	广州雷盎人工智能技术有限公司（曾用名：广州亮维智能科技有限公司）	2006-09-28	2022-12-27	M	73	研究和试验发展	广东省	广州市	番禺区	广州市番禺区东环街龙美莲花路2号2栋104铺	113.369	22.9658
83	广州凌威信息科技有限公司	2010-04-08	2021-03-31	M	73	研究和试验发展	广东省	广州市	天河区	广州市天河区荷光路154号2F	113.38	23.1416
84	广州龙之杰科技集团有限公司（曾用名：广州龙之杰科技有限公司）	2000-01-26	2024-04-08	M	73	研究和试验发展	广东省	广州市	黄埔区	广州市黄埔区开源大道11号A3A4连廊405室	113.502	23.1594
85	广州茂腾信息科技有限公司	2009-07-03	2021-04-20	M	74	专业技术服务业	广东省	广州市	天河区	广州市天河区翰景路1号金星大厦5楼G409（仅限办公）	113.354	23.1498
86	广州能之原科技股份有限公司（曾用名：广州能之原节能技术有限公司）	2008-05-14	2019-12-12	M	75	科技推广和应用服务业	广东省	广州市	天河区	广州市高新技术产业开发区科学城开源大道11号C3栋第四层	113.504	23.1626
87	广东派勒智能纳米科技股份有限公司（曾用名：广州派勒机械设备有限公司）	2007-09-18	2023-06-01	M	74	专业技术服务业	广东省	广州市	番禺区	广州市番禺区钟村街创源路一号	113.308	22.97
88	广州三乐信息科技有限公司	2006-09-06	2021-12-02	M	73	研究和试验发展	广东省	广州市	天河区	广州市天河区建中路59号柏朗奴大厦602之A	113.378	23.1296
89	广州施耐电子科技有限公司	2003-04-29	2016-04-25	M	74	专业技术服务业	广东省	广州市	番禺区	广州市番禺区沙头街汀根村大板工业区一街22号6号厂房五楼	113.334	22.9449
90	广州世安信息技术股份有限公司（曾用名：广州世安信息技术有限公司）	2004-02-18	2023-12-28	I	65	软件和信息技术服务业	广东省	广州市	天河区	广州市天河区天河东路155、157、159号整栋部位：901（仅限办公用途）	113.339	23.1427
91	广州世荣电子股份有限公司（曾用名：广州世荣电子有限公司）	2009-12-15	2017-12-18	C	39	计算机、通信和其他电子设备制造业	广东省	广州市	黄埔区	广州市经济技术开发区科学城科珠路232号2栋一层101房	113.445	23.1768
92	广州市白云联佳精细化工厂	1997-12-24	2024-03-11	C	26	化学原料和化学制品制造业	广东省	广州市	白云区	广州市白云区永兴瑚琏一路7号	113.345	23.2742
93	广州市百臣信息科技有限公司	2010-08-23	2019-12-07	M	73	研究和试验发展	广东省	广州市	天河区	广州市天河区华庭路4号701B	113.336	23.1505
94	广州市城建开发集团名特网络发展有限公司	2000-07-27	2023-01-04	E	49	建筑安装业	广东省	广州市	天河区	广州市天河区体育东路114号2401单元	113.335	23.1419
95	广东寰宇电子科技股份有限公司（曾用名：广州市寰宇电子科技有限公司）	2006-09-29	2022-05-29	C	39	计算机、通信和其他电子设备制造业	广东省	广州市	南沙区	广州市南沙区东涌镇马发街16号自编1栋（厂房）自编号202	113.447	22.8522
96	广东嘉铭智能科技有限公司（曾用名：广州市佳铭工业器材有限公司）	2000-08-08	2019-05-15	M	73	研究和试验发展	广东省	广州市	越秀区	广州市越秀区明月一路20号2403室（仅限办公）	113.319	23.1211
97	广州市精源电子设备有限公司	2006-04-19	2017-06-06	M	73	研究和试验发展	广东省	广州市	黄埔区	广州高新技术产业开发区科学城开源大道188号B栋第六层	113.518	23.1611
98	广州市九佛电器有限公司	1986-08-21	2023-02-27	C	38	电气机械和器材制造业	广东省	广州市	白云区	广州市白云区广华路137号	113.496	23.4149
99	广州市凯闻食品发展有限公司	2005-06-15	2023-06-26	C	14	食品制造业	广东省	广州市	增城区	广州市增城荔城街金徽路19号	113.783	23.2926
100	广州市鲁班建筑工程技术有限公司	2009-01-08	2021-10-27	E	50	建筑装饰、装修和其他建筑业	广东省	广州市	天河区	广州市天河区华观路1933号408房（仅限办公用途）	113.409	23.1752
101	广州市启泰模具工业有限公司	2001-08-01	2016-03-18	C	34	通用设备制造业	广东省	广州市	从化区	广州市从化明珠工业园丽峰路7号	113.553	23.5917
102	广州市特耐得车轴有限公司	2007-05-22	2023-09-01	C	36	汽车制造业	广东省	广州市	增城区	广州市增城区石滩镇仙塘村猪头代督（土名）	113.816	23.1955
103	广州市天海花边有限公司	1990-09-25	2023-04-27	C	17	纺织业	广东省	广州市	天河区	广州市天河区黄埔大道中660号之一518房	113.357	23.1303
104	广州天维信息技术股份有限公司（曾用名：广州市天维数码技术有限公司）	2001-07-05	2022-07-22	I	65	软件和信息技术服务业	广东省	广州市	天河区	广州市天河区华观路1934号501房	113.412	23.1727
105	广州市添鑫光电有限公司	2004-10-25	2021-08-18	C	38	电气机械和器材制造业	广东省	广州市	花都区	广州市花都区花东镇秀塘村金谷南路15号之一	113.369	23.4459
106	广州威万事家居股份有限公司（曾用名：广州市威万事五金有限公司）	2005-07-11	2023-01-04	C	35	专用设备制造业	广东省	广州市	南沙区	广州市南沙区榄核镇榄张路70号A101、C101	113.339	22.8451
107	广州市为人软件科技有限公司	2004-04-01	2023-03-17	I	65	软件和信息技术服务业	广东省	广州市	天河区	广州市天河区花城大道665号2903房（仅限办公）	113.349	23.1241
108	广州市新栋力超声电子设备有限公司	1999-01-26	2023-03-10	C	35	专用设备制造业	广东省	广州市	从化区	广州市从化鳌头镇鹿田村石马头（土名）	113.519	23.6348
109	广州市新之地环保产业股份有限公司（曾用名：广州市新之地环保产业有限公司）	1999-08-03	2023-12-26	N	77	生态保护和环境治理业	广东省	广州市	荔湾区	广州市荔湾区花地大道中83号16楼（部位：1601-1614室）	113.241	23.0995
110	广州市原子高科同位素医药有限公司	2000-01-24	2024-03-04	C	27	医药制造业	广东省	广州市	黄埔区	广州市萝岗区科学城崖鹰石路10号自编A座三楼	113.426	23.6574
111	广州数控信息科技有限公司	2006-09-13	2016-12-19	I	65	软件和信息技术服务业	广东省	广州市	黄埔区	广州市萝岗区观达路22号自编二栋	113.549	23.1597
112	广州万容信息技术有限公司	2002-07-24	2022-05-27	M	73	研究和试验发展	广东省	广州市	天河区	广州市天河区广汕二路13号2FZ64房	113.408	23.1999
113	广州文讯信息科技有限公司	2001-07-20	2021-04-15	I	65	软件和信息技术服务业	广东省	广州市	越秀区	广州市越秀区白云路111号1412房	113.292	23.1265
114	广州新视界光电科技有限公司	2010-08-06	2023-06-29	C	40	仪器仪表制造业	广东省	广州市	黄埔区	广州市黄埔区开源大道11号A1栋201室	113.504	23.1626
115	广州鑫广源电力设计有限公司	2004-05-26	2023-03-31	M	74	专业技术服务业	广东省	广州市	越秀区	广州市越秀区梅东路21号	113.313	23.135
116	广州市一呼百应网络技术股份有限公司（曾用名：广州一呼百应网络技术有限公司）	2007-11-21	2020-06-12	M	73	研究和试验发展	广东省	广州市	黄埔区	广州市黄埔区光谱中路11号2栋1单元1201房	113.451	23.1664
117	广州盈可视电子科技有限公司	2007-11-07	2022-07-22	C	39	计算机、通信和其他电子设备制造业	广东省	广州市	黄埔区	广州高新技术产业开发区科学城科学大道162号创意大厦B2栋第2层201单元	113.457	23.1696
118	广州致控节能科技有限公司	2001-12-17	2020-01-16	M	75	科技推广和应用服务业	广东省	广州市	番禺区	广州市番禺区东环街番禺大道北537号番禺节能科技园内番山创业中心1号楼1区403	113.37	22.9845
119	汉威广园（广州）机械设备有限公司	2007-05-16	2020-05-12	C	35	专用设备制造业	广东省	广州市	黄埔区	广州高新技术产业开发区科学城新瑞路8号	113.488	23.1649
120	广州华芳烟用香精有限公司（曾用名：华芳烟用香料有限公司）	1992-10-16	2023-11-15	C	26	化学原料和化学制品制造业	广东省	广州市	黄埔区	广州市黄埔区云埔工业区云埔一路22号	113.547	23.1514
121	水利部珠江水利委员会技术咨询（广州）有限公司（曾用名：水利部珠江水利委员会技术咨询中心）	1995-06-08	2023-11-27	N	76	水利管理业	广东省	广州市	天河区	广州市天河区天寿路80号14层	113.339	23.1501
122	中国电器科学研究院股份有限公司（曾用名：中国电器科学研究院有限公司）	2002-09-06	2023-09-15	M	73	研究和试验发展	广东省	广州市	海珠区	广州市海珠区新港西路204号第1栋	113.316	23.1011
123	安捷利（番禺）电子实业有限公司	1994-04-08	2024-03-18	C	39	计算机、通信和其他电子设备制造业	广东省	广州市	南沙区	广州市南沙区环市大道南63号	113.573	22.7586
124	星星精密科技（广州）有限公司（曾用名：贝尔罗斯（广州）电子部件有限公司）	2005-05-20	2022-09-21	M	73	研究和试验发展	广东省	广州市	黄埔区	广州市黄埔区云埔街荔联东联街37号723房	113.55	23.1188
125	奇华顿香精香料（广州）有限公司（曾用名：德乐满香精香料（广州）有限公司）	2003-08-27	2023-10-13	M	73	研究和试验发展	广东省	广州市	黄埔区	广州经济技术开发区东区宏景路66号	113.534	23.1308
126	广东本致数码科技有限公司	-	-	M	73	研究和试验发展	广东省	广州市	黄埔区	广州市黄埔区科学大道162号B2栋1003房	113.457	23.17
127	广东车联网信息科技服务有限公司	2010-11-16	2020-12-29	I	65	软件和信息技术服务业	广东省	广州市	天河区	广州市天河区冼村路11号之二35层自编04A单元（仅限办公用途）	113.334	23.1275
128	广东丰德科技有限公司	1995-10-06	2023-11-13	C	39	计算机、通信和其他电子设备制造业	广东省	广州市	天河区	广州市天河区天河北路898号3020室	113.352	23.1471
129	广东广联电子科技有限公司	2009-02-23	2020-12-23	M	73	研究和试验发展	广东省	广州市	番禺区	广州市番禺区小谷围街外环东路232号13栋B335-B336	113.405	23.0513
130	广东浩和建筑股份有限公司	2000-11-15	2023-05-24	E	47	房屋建筑业	广东省	广州市	黄埔区	广东省广州市黄埔区芳草甸路2号香山路21号自编10栋（部位：一楼、三楼）	113.449	23.1875
131	广东江大和风香精香料有限公司	2007-06-28	2007-09-29	C	26	化学原料和化学制品制造业	广东省	广州市	天河区	广州市天河区体育西路189号71-08房	113.327	23.1447
132	广东科邦饲料科技有限公司	2004-12-31	2021-03-17	C	13	农副食品加工业	广东省	广州市	花都区	广州市花都区花东镇花都大道东88号	113.318	23.4424
133	广东联合通用电梯有限公司	2007-08-28	2015-12-02	C	34	通用设备制造业	广东省	广州市	从化区	广州市从化太平镇广从北路298号	113.555	23.5084
134	广东清华文通科技有限公司	2003-06-26	2022-12-13	I	65	软件和信息技术服务业	广东省	广州市	天河区	广东省广州市天河区天河科技园高普路83号A栋410	113.418	23.1928
135	广东清华中邦热能科技有限公司	2007-03-29	2019-09-01	C	38	电气机械和器材制造业	广东省	广州市	黄埔区	广东省广州市高新技术产业开发区科学城科研路12号312房	113.448	23.1759
136	日海通信服务有限公司（曾用名：广东日海通信工程有限公司）	2002-12-18	2022-12-16	I	63	电信、广播电视和卫星传输服务	广东省	广州市	白云区	广州市高新技术产业开发区科学城科学大道162号创意大厦B1栋附楼第3层301、302单元	113.456	23.1695
137	广东赛杰自动化与信息技术转移中心有限公司	2003-08-13	2022-06-08	I	65	软件和信息技术服务业	广东省	广州市	越秀区	广州市越秀区先烈中路100号大院15号之一二楼	113.306	23.1455
138	广东悦源环保工程有限公司（曾用名：广东森洋环境保护工程设备有限公司）	1998-01-16	2023-10-24	N	77	生态保护和环境治理业	广东省	广州市	天河区	广东省广州市天河区东圃二马路67号22、23、24房部位23-403房	113.408	23.1181
139	广东省冶金建筑设计研究院有限公司（曾用名：广东省冶金建筑设计研究院）	1994-09-02	2024-03-28	M	74	专业技术服务业	广东省	广州市	越秀区	广东省广州市越秀区中山二路３５号	113.297	23.1309
140	广东幸美化妆品股份有限公司	2010-06-12	2023-06-06	M	73	研究和试验发展	广东省	广州市	越秀区	广州市越秀区执信南路64号A329房	113.3	23.1331
141	广东网金控股股份有限公司（曾用名：广东优迈信息通信技术有限公司）	2009-09-15	2021-09-17	L	72	商务服务业	广东省	广州市	天河区	广州市天河区科林路18号6栋301-722房	113.451	23.1478
142	广东粤电信息科技有限公司	2009-11-11	2022-05-17	M	73	研究和试验发展	广东省	广州市	天河区	广州市天河区天河东路4,6号601房自编南塔8层	113.341	23.1355
143	广东中审软件技术有限公司	2003-01-03	2022-12-07	I	65	软件和信息技术服务业	广东省	广州市	天河区	广东省广州市天河区黄埔大道中路146-150号第三层6号	113.361	23.1296
144	广铝集团有限公司	2002-11-08	2018-12-13	C	35	专用设备制造业	广东省	广州市	白云区	广州市白云区江高镇青云路55号	113.221	23.2743
145	广州昂宝电子有限公司	2010-04-01	2024-02-04	C	39	计算机、通信和其他电子设备制造业	广东省	广州市	黄埔区	广州市高新技术产业开发区科学城科学大道162号B2区第12层1201、1202、1203、1204单元	113.442	23.166
146	广州柏诚智能科技有限公司	2000-08-29	2024-04-03	C	40	仪器仪表制造业	广东省	广州市	黄埔区	广州市黄埔区科学大道101号611房（仅限办公）	113.443	23.1717
147	广州保均塑料科技有限公司	2008-11-13	2021-03-22	C	29	橡胶和塑料制品业	广东省	广州市	花都区	广州市花都区平步大道西15号102铺、103铺	113.211	23.4347
148	广州贝特新材料有限公司	2000-03-14	2023-11-13	C	38	电气机械和器材制造业	广东省	广州市	花都区	广州市花都区新华工业区大布路36号	113.173	23.4192
149	广东博芳环保科技集团股份有限公司（曾用名：广州博芳环保科技有限公司）	2006-04-04	2024-01-24	N	77	生态保护和环境治理业	广东省	广州市	番禺区	广州市番禺区东环街迎宾路730号番禺节能科技园内天安科技产业大厦2座909房	113.375	22.9867
150	广州常富机械工业有限公司	2006-04-04	2023-09-27	C	36	汽车制造业	广东省	广州市	黄埔区	广州经济技术开发区永和经济区永盛路20号	113.585	23.2252
151	广州畅途软件有限公司	2008-11-07	2021-03-26	I	65	软件和信息技术服务业	广东省	广州市	天河区	广州市天河区天河北路721号三楼自编01-129房（仅限办公）	113.352	23.1476
152	广州诚恒化工有限公司	2009-11-06	2019-09-11	C	26	化学原料和化学制品制造业	广东省	广州市	南沙区	广州市南沙区黄阁镇小虎南三路10号	113.552	22.8441
153	广州创天电子科技有限公司	2003-12-02	2023-09-14	C	39	计算机、通信和其他电子设备制造业	广东省	广州市	黄埔区	广州市黄埔区来安一街8号之二	113.549	23.2104
154	广州大华德盛热管理科技股份有限公司（曾用名：广州大华德盛热管理科技有限公司）	2010-12-21	2017-09-14	M	74	专业技术服务业	广东省	广州市	白云区	广州市白云区科盛路1、3、5号自编4栋1701房	113.342	23.3086
155	广州大运摩托车有限公司	2008-02-13	2024-03-29	C	37	铁路、船舶、航空航天和其他运输设备制造业	广东省	广州市	花都区	广州市花都区新华街永发大道12号	113.197	23.4219
156	广州导新模具注塑有限公司	1993-12-27	2024-02-27	C	35	专用设备制造业	广东省	广州市	番禺区	广州市番禺区大石街会江石北工业大道会江段10号106、107	113.292	23.0199
157	广州德渊精细化工有限公司	2007-07-10	2021-12-14	C	26	化学原料和化学制品制造业	广东省	广州市	黄埔区	广州经济技术开发区永和经济区沧海二路6号	113.57	23.1871
158	广州电力设计院有限公司	2002-02-24	2023-03-08	M	74	专业技术服务业	广东省	广州市	越秀区	广州市越秀区梅花路1号202房	113.315	23.1349
159	广州方达舞台设备有限公司	2000-07-04	2023-04-10	C	38	电气机械和器材制造业	广东省	广州市	荔湾区	广州市荔湾区中山八路95号四楼415-8	113.24	23.131
160	广州飞禧特生物科技有限公司（曾用名：广州飞禧特水产科技有限公司）	2006-03-01	2023-09-18	M	75	科技推广和应用服务业	广东省	广州市	天河区	广州市天河区五山大丰一街1号广东省农业科学院畜牧研究所A区1号3楼	113.372	23.1617
161	广州福耀玻璃有限公司	2006-06-08	2021-06-08	C	36	汽车制造业	广东省	广州市	增城区	广州市增城市新塘镇荔新公路段	113.808	23.2623
162	广州高天电力科技有限公司	2006-07-19	2018-01-19	M	73	研究和试验发展	广东省	广州市	天河区	广州市天河区天河北路689号8楼B1房	113.349	23.1476
163	广州冠众电子科技股份有限公司（曾用名：广州冠众电子科技有限公司）	2008-08-11	2022-01-28	M	73	研究和试验发展	广东省	广州市	黄埔区	广州经济技术开发区科学城科珠路203号F1001房	113.442	23.1704
164	广州硅芯电子科技有限公司	2005-06-06	2023-03-27	C	39	计算机、通信和其他电子设备制造业	广东省	广州市	荔湾区	广州市荔湾区周门北路40号304房	113.248	23.1371
165	海闻科技有限公司（曾用名：广州海闻软件技术有限公司）	2008-12-29	2023-12-12	I	65	软件和信息技术服务业	广东省	广州市	天河区	广州市天河区体育东路122号之二2404房（仅限办公）	113.336	23.1423
166	广东海因特生物技术集团有限公司（曾用名：广州海因特生物技术有限公司）	2007-02-06	2018-03-15	M	73	研究和试验发展	广东省	广州市	黄埔区	广州高新技术产业开发区新桂二路56号	113.493	23.1572
167	广州合成材料研究院有限公司	1986-09-01	2021-09-01	C	26	化学原料和化学制品制造业	广东省	广州市	天河区	广州市天河区棠下车陂西路396号	113.387	23.1437
168	广州鸿根信息科技有限公司	2009-04-21	2022-05-26	L	72	商务服务业	广东省	广州市	天河区	广州市天河区天源路804号17栋103房（仅限办公）	113.36	23.1832
169	广州花语精细化工有限公司	2007-06-13	2018-06-13	C	26	化学原料和化学制品制造业	广东省	广州市	黄埔区	广州中新广州知识城凤凰三路12号	113.503	23.3992
170	广州华工弈高科技有限公司	2001-04-25	2023-05-31	M	73	研究和试验发展	广东省	广州市	天河区	广州市天河区长福路207号1-4层2层02房	113.353	23.172
171	广州华浩能源环保集团股份有限公司（曾用名：广州华浩能源环保集团有限公司）	1999-06-18	2022-10-17	M	74	专业技术服务业	广东省	广州市	越秀区	广州市越秀区解放南路123号金汇大厦401房	113.269	23.1232
172	广州华汇生物实业有限公司	2007-11-02	2022-11-01	C	14	食品制造业	广东省	广州市	南沙区	广州市南沙区横沥镇繁泰街18号	113.493	22.7378
173	广州华腾教育科技股份有限公司（曾用名：广州华腾信息科技有限公司）	2009-01-06	2022-09-26	M	73	研究和试验发展	广东省	广州市	越秀区	广州市越秀区先烈中路75号、77号自编1栋A508房	113.3	23.1434
174	广州华迅网络科技有限公司	2011-05-26	2022-06-21	I	64	互联网和相关服务	广东省	广州市	海珠区	广州市海珠区金纺路2号广州国际轻纺城F7010号铺	113.303	23.0945
175	广州华苑园林股份有限公司（曾用名：广州华苑园艺有限公司）	1995-09-15	2024-02-08	N	78	公共设施管理业	广东省	广州市	越秀区	广州市越秀区中山一路34号自编3号	113.315	23.135
176	广州欢网科技有限责任公司	2009-11-26	2024-03-06	M	73	研究和试验发展	广东省	广州市	番禺区	广州市番禺区小谷围街中二横路22号A513-A514	113.401	23.067
177	广东嘉德乐科技股份有限公司（曾用名：广州嘉德乐生化科技有限公司）	2005-12-15	2023-04-27	C	26	化学原料和化学制品制造业	广东省	广州市	黄埔区	广州经济技术开发区永和区华峰路6号	113.572	23.2177
178	广东先导嘉能智能科技有限公司（曾用名：广州嘉能自动化设备有限公司）	1992-04-30	2023-09-26	C	40	仪器仪表制造业	广东省	广州市	白云区	广州市白云区钟落潭镇良田环村西路15号1栋101室	113.39	23.3588
179	广州建设工程质量安全检测中心有限公司	2000-01-25	2022-09-05	M	73	研究和试验发展	广东省	广州市	白云区	广州市白云区白云大道北833号一、三、四层	113.303	23.2313
180	广州建筑股份有限公司	2010-06-03	2022-08-29	E	47	房屋建筑业	广东省	广州市	越秀区	广州市越秀区广卫路4号6楼	113.274	23.1338
181	广州金田瑞麟环境科技有限公司（曾用名：广州金田瑞麟净化设备制造有限公司）	2005-01-20	2023-03-15	M	73	研究和试验发展	广东省	广州市	番禺区	广州市番禺区石楼镇华山路11号（厂房）	113.484	22.9649
182	广州锦盈新型材料有限公司（曾用名：广州锦盈建材有限公司）	2006-08-15	2023-12-29	C	30	非金属矿物制品业	广东省	广州市	花都区	广州市花都区赤坭镇赤坭大道南38号（原花都陶瓷厂内）	113.098	23.3898
183	广州竞标新能源汽车部件股份有限公司（曾用名：广州竞标汽车零部件制造有限公司）	2004-06-03	2023-11-20	C	36	汽车制造业	广东省	广州市	花都区	广州市花都区花山镇两龙村龙腾路6号	113.289	23.4608
184	广州竞远安全技术股份有限公司（曾用名：广州竞远系统网络技术有限公司）	2003-12-10	2023-05-06	I	65	软件和信息技术服务业	广东省	广州市	南沙区	广州市高新技术产业开发区科学城科珠路201号G320	113.443	23.1698
185	广州聚晶能源科技股份有限公司	2010-01-14	2018-03-09	M	73	研究和试验发展	广东省	广州市	白云区	广州市白云区黄园路135号（3栋）1015房	113.274	23.2129
186	摩登大道时尚集团股份有限公司（曾用名：广州卡奴迪路服饰股份有限公司）	2002-07-18	2024-03-19	M	74	专业技术服务业	广东省	广州市	黄埔区	广州市黄埔区科学城光谱中路23号	113.463	23.1641
187	广州科宸电脑工程有限公司	1999-08-04	2021-02-08	I	65	软件和信息技术服务业	广东省	广州市	越秀区	广州市越秀区越华路112号3901房号（自编03a01、03a02、03a03）单元	113.274	23.1359
188	广州宽带主干网络有限公司	2000-06-13	2024-01-15	I	64	互联网和相关服务	广东省	广州市	黄埔区	广州市黄埔区开源大道11号B1栋201室	113.502	23.1594
189	广州蓝弧文化传播有限公司	2007-06-04	2023-08-09	R	87	广播、电视、电影和录音制作业	广东省	广州市	荔湾区	广州市荔湾区逢源路128号19层（仅限办公用途）	113.246	23.1265
190	广州蓝姆汽车设备有限公司	2003-08-12	2015-02-11	C	36	汽车制造业	广东省	广州市	花都区	广州市花都区汽车城岭东路西35呈	113.155	23.3703
191	广州朗豪自动化科技有限公司	2008-01-15	2021-03-16	M	73	研究和试验发展	广东省	广州市	越秀区	广州市越秀区寺右新马路北二街26号之一二层208房（仅限办公用途）	113.32	23.1268
192	广州朗朗电子科技有限公司	2010-03-10	2014-10-10	C	39	计算机、通信和其他电子设备制造业	广东省	广州市	天河区	广州市天河区新塘田头岗工业区二大道一横路2号自编A栋312房	113.42	23.1738
193	广州朗腾新材料有限公司（曾用名：广州朗腾聚氨酯有限公司）	2002-04-01	2023-08-03	C	26	化学原料和化学制品制造业	广东省	广州市	从化区	广州市广东从化经济开发区龙洞路6号	113.511	23.4482
194	广州联茂电子科技有限公司	2006-03-08	2021-06-28	C	39	计算机、通信和其他电子设备制造业	广东省	广州市	黄埔区	广州经济技术开发区永和经济区华峰路2号	113.573	23.2166
195	广州迈普再生医学科技股份有限公司（曾用名：广州迈普再生医学科技有限公司）	2008-09-02	2023-05-30	M	73	研究和试验发展	广东省	广州市	黄埔区	广州高新技术产业开发区科学城揽月路80号E区第三层	113.458	23.1661
196	广州门德纳米科技有限公司	2005-07-12	2021-06-07	M	73	研究和试验发展	广东省	广州市	番禺区	广州市番禺区市桥街西城路57号西城路三街西兴苑18幢18号E66	113.364	22.9373
197	广州梦龙科技有限公司（曾用名：广州梦龙动漫科技有限公司）	2009-01-24	2017-03-23	M	73	研究和试验发展	广东省	广州市	天河区	广州市天河区中山大道路140号华港商务大厦22楼2203房（仅限办公用途）	113.364	23.1377
198	广州名道信息科技有限公司	2008-12-25	2021-07-19	M	73	研究和试验发展	广东省	广州市	天河区	广州市天河区天河北路559号2302自编B95房（仅限办公）	113.341	23.1477
199	广州南广文化传播有限公司	2010-06-22	2024-01-17	R	88	文化艺术业	广东省	广州市	越秀区	广州市天河区体育西路111-115单号21楼B20房（仅限办公）	113.328	23.1416
200	广州南新制药有限公司	1993-09-17	2024-03-27	C	27	医药制造业	广东省	广州市	黄埔区	广州市萝岗区开源大道196号自编1-2栋	113.521	23.1655
201	广州能率教育科技有限公司	2009-08-19	2020-11-23	M	73	研究和试验发展	广东省	广州市	天河区	广州市天河区五山路248号金山大厦402自编404-405房	113.353	23.1497
202	广州欧凯特种陶瓷有限公司	2005-04-29	2022-03-24	C	30	非金属矿物制品业	广东省	广州市	花都区	广州市花都区红棉大道48号美国工业村第11号标准厂房	113.177	23.4165
203	广州齐达材料科技有限公司	2006-07-10	2021-05-24	M	73	研究和试验发展	广东省	广州市	黄埔区	广州市黄埔区科学城揽月路80号科技创新基地E区208-210单元、209-211单元（仅限办公）	113.459	23.1654
204	广汽乘用车有限公司（曾用名：广州汽车集团乘用车有限公司）	2008-07-21	2023-07-17	C	36	汽车制造业	广东省	广州市	番禺区	广州市番禺区金山大道东路633号	113.504	23.0475
205	广州千松科技有限公司	2005-12-13	2021-03-31	C	26	化学原料和化学制品制造业	广东省	广州市	黄埔区	广州市黄埔区贵尚路10号3005房（仅限办公）	113.487	23.1875
206	广州群志科技股份有限公司（曾用名：广州群志科技有限公司）	1998-06-12	2023-08-25	M	73	研究和试验发展	广东省	广州市	天河区	广州市天河区天河北路362号都市华庭月观轩12楼B号房	113.335	23.1469
207	广州飒美旭能源科技有限公司	2004-06-12	2020-09-11	M	73	研究和试验发展	广东省	广州市	番禺区	广州市番禺区钟村街钟屏岔道23号四楼407	113.323	22.983
208	广州赛莱拉干细胞科技股份有限公司（曾用名：广州赛莱拉生物科技有限公司）	2009-07-07	2023-09-08	M	73	研究和试验发展	广东省	广州市	黄埔区	广州国际生物岛螺旋四路一号生产区第五层502单元	113.374	23.0665
209	广州泰华多层电路股份有限公司（曾用名：广州三祥多层电路有限公司）	2006-06-07	2021-12-08	C	39	计算机、通信和其他电子设备制造业	广东省	广州市	花都区	广州市花都区花山镇两龙横街第一工业区	113.28	23.4426
210	广州善元堂健康科技股份有限公司（曾用名：广州善元堂医药科技有限公司）	2006-02-20	2023-12-11	M	75	科技推广和应用服务业	广东省	广州市	白云区	广州市白云区钟落潭镇大纲领越秀工业园街10号101厂	113.362	23.3604
211	广州上源物联网科技有限公司	2010-12-21	2022-11-23	I	65	软件和信息技术服务业	广东省	广州市	越秀区	广州市越秀区广卫路19号之二804房自编A01号	113.273	23.1333
212	广州声德电子有限公司	2006-11-14	2019-03-27	M	73	研究和试验发展	广东省	广州市	黄埔区	广州高新技术产业开发区科学城神舟路885号B栋4、5层	113.452	23.1906
213	恒天华业（广州）科技有限公司（曾用名：广州圣地信息技术有限公司）	2003-06-27	2021-09-16	M	73	研究和试验发展	广东省	广州市	越秀区	广州市越秀区先烈中路83号501自编之五（仅限办公用途）	113.306	23.1482
214	广州石竹计算机软件有限公司	2002-08-26	2022-10-31	I	65	软件和信息技术服务业	广东省	广州市	天河区	广州市天河区天河北路559号2303自编C25房（仅限办公）	113.342	23.1475
215	广州市阿尔法软件信息技术有限公司	2001-04-23	2022-12-06	I	65	软件和信息技术服务业	广东省	广州市	天河区	广州市天河区天慧路14号 C405、C406、C407房	113.428	23.1856
216	广州市安信杰科技有限公司	2000-01-12	2020-09-08	M	74	专业技术服务业	广东省	广州市	海珠区	广州市海珠区敦和路189号大院第1栋自编109C房（仅限办公用途）	113.326	23.0941
217	广州市奥威亚电子科技有限公司	2005-01-11	2024-02-29	C	39	计算机、通信和其他电子设备制造业	广东省	广州市	黄埔区	广州市萝岗区科学城科学大道科汇发展中心科汇二街15号501房	113.442	23.1732
218	广州通达汽车电气股份有限公司（曾用名：广州市白云区通达汽车灯具电器厂）	1994-01-11	2024-02-20	C	36	汽车制造业	广东省	广州市	白云区	广州市白云区云正大道1112号	113.322	23.3041
219	广州市柏特科技有限公司	2003-08-04	2022-05-26	I	65	软件和信息技术服务业	广东省	广州市	天河区	广州市天河区中山大道建工路13、15号408房（仅限办公）（不可作厂房使用）	113.379	23.1288
220	广州市宝升新科技发展有限公司	2000-07-18	2018-05-18	I	65	软件和信息技术服务业	广东省	广州市	天河区	广州市天河区金颖路1号1211房	113.354	23.1518
221	广东保伦电子股份有限公司（曾用名：广州市保伦电子有限公司）	2008-07-25	2023-12-26	C	39	计算机、通信和其他电子设备制造业	广东省	广州市	番禺区	广州市番禺区石碁镇南荔东路56号	113.478	22.9636
222	广州市倍儿悦动漫科技有限公司	2009-07-24	2022-05-09	M	73	研究和试验发展	广东省	广州市	番禺区	广州市番禺区东环街番禺大道北555号天安总部中心8号楼501房之三	113.377	22.9869
223	广州市超赢信息科技有限公司	2004-06-05	2022-07-29	M	73	研究和试验发展	广东省	广州市	天河区	广州市天河区建中路64、66号东501	113.377	23.1287
224	广州市晨威电子科技有限公司	2003-01-16	2022-11-28	C	35	专用设备制造业	广东省	广州市	番禺区	广州市番禺区洛浦街西一村工业路61号恒盛工业园2号501	113.277	23.055
225	广州市成格信息技术有限公司	2010-11-10	2024-02-21	M	73	研究和试验发展	广东省	广州市	天河区	广州市天河区中山大道西93号401室（仅限办公）	113.37	23.1424
226	广州市达瑞生物技术股份有限公司（曾用名：广州市达瑞抗体工程技术有限公司）	2003-08-11	2023-09-21	M	73	研究和试验发展	广东省	广州市	黄埔区	广州市高新技术产业开发区荔枝山路6号自编2号404	113.444	23.1852
227	广州市冠誉铝箔包装材料有限公司	2003-05-06	2018-05-18	C	33	金属制品业	广东省	广州市	黄埔区	广州经济技术开发区锦绣路碧华街12号	113.53	23.0563
228	广州爱美互动网络科技有限公司（曾用名：广州市涵浩网络科技有限公司）	2007-09-20	2023-10-08	M	73	研究和试验发展	广东省	广州市	天河区	广州市天河区高普路38号508房（仅限办公）	113.419	23.1916
229	广州市韩升电子科技有限公司	2007-09-12	2015-03-04	M	73	研究和试验发展	广东省	广州市	番禺区	广州市番禺区市桥街白云路段85至89号3、4楼	113.374	22.9585
230	广州市花都区兆星电子厂	1999-08-16	2011-05-16	C	39	计算机、通信和其他电子设备制造业	广东省	广州市	花都区	广州市花都区新华镇东镜工业区	113.237	23.3572
231	广州市家御广告制品有限公司	2007-07-09	2022-03-16	C	41	其他制造业	广东省	广州市	增城区	广州市增城区新塘镇南安广虎路23号	113.566	23.1229
232	广州市精鼎电器科技有限公司	2005-12-31	2024-03-12	C	38	电气机械和器材制造业	广东省	广州市	白云区	广州市白云区西槎路799号三楼	113.244	23.1857
233	广州市井源机电设备有限公司	2004-04-29	2022-01-19	C	35	专用设备制造业	广东省	广州市	南沙区	广州市南沙区盛良路1号101房	113.531	22.8079
234	广州市景泰科技有限公司	2004-07-07	2020-09-25	M	73	研究和试验发展	广东省	广州市	黄埔区	广州市黄埔区瑞和路39号G5座101	113.511	23.158
235	广州市景心科技股份有限公司（曾用名：广州市景心网络科技有限公司）	2005-09-19	2024-01-30	L	72	商务服务业	广东省	广州市	天河区	广州市天河区天府路309号301房自编之一（本住所限写字楼功能）	113.373	23.1403
236	广州市九重天信息科技有限公司	2007-01-31	2023-10-11	M	73	研究和试验发展	广东省	广州市	天河区	广州市天河区能源路4号803房（仅限办公）	113.353	23.1706
237	广州市君盘实业有限公司	-	-	C	38	电气机械和器材制造业	广东省	广州市	花都区	广州市花都区花东镇顺祥路15号空港微观产业园A栋A区401	113.329	23.4378
238	广东骏汇汽车科技股份有限公司（曾用名：广州市骏佳金属制品有限公司）	2005-07-11	2024-02-02	C	36	汽车制造业	广东省	广州市	番禺区	广州市番禺区石楼镇金荷二路7号自编（A座四层）	113.501	23.0338
239	广州市科城规划勘测技术有限公司	2000-04-14	2016-12-06	M	74	专业技术服务业	广东省	广州市	黄埔区	广州高新技术产业开发区科学城科学大道121号科城大厦	113.446	23.1718
240	广州市科进计算机技术有限公司	2009-06-26	2018-06-06	I	65	软件和信息技术服务业	广东省	广州市	番禺区	广州市番禺区钟村街祈福新邨福华路15号1802（自编号）单元	113.341	22.9769
241	广州市力锦电子科技有限公司	2009-08-24	2024-04-10	M	73	研究和试验发展	广东省	广州市	天河区	广州市天河区龙口东路354号507、508房	113.347	23.1488
242	广州市联诺化工科技有限公司	2003-01-29	2020-02-28	C	26	化学原料和化学制品制造业	广东省	广州市	南沙区	广州市南沙区东涌镇大同村裕丰路60号	113.398	22.8933
243	广东麦新电子科技有限公司（曾用名：广州市麦新电子有限公司）	2008-09-27	2023-01-06	C	39	计算机、通信和其他电子设备制造业	广东省	广州市	南沙区	广州市南沙区留新路3号自编2栋202房	113.508	22.856
244	广州市漫联电子科技有限公司	2004-04-24	2020-01-17	M	73	研究和试验发展	广东省	广州市	天河区	广州市天河区大观中路492号岭南科技中心附属二层小楼一楼（仅限办公用途）（不可作厂房使用）	113.423	23.1743
245	广州市名花香料有限公司	2003-06-09	2022-12-30	M	73	研究和试验发展	广东省	广州市	白云区	广州市白云区永平街白云大道北东凤东路东坑街1号	113.328	23.2545
246	广州市明美光电技术有限公司	2008-07-21	2023-05-24	M	73	研究和试验发展	广东省	广州市	天河区	广州市天河区华观路1933号（商业、办公楼自编A栋）506房（不可作厂房使用）	113.409	23.1752
247	广州市铭慧机械股份有限公司（曾用名：广州市铭慧包装机械有限公司）	2009-12-22	2022-03-24	C	35	专用设备制造业	广东省	广州市	番禺区	广州市番禺区大龙街汉基大道22号（入口门楼、厂房一、厂房二、厂房三、厂房四）	113.437	22.9532
248	广州市锐新软件技术有限公司	2000-07-19	2023-11-27	M	73	研究和试验发展	广东省	广州市	番禺区	广州市番禺区石楼镇黄山路68号3幢1701	113.495	22.9714
249	广州市赛导电气技术有限公司	2003-09-27	2016-10-20	M	75	科技推广和应用服务业	广东省	广州市	番禺区	广州市番禺区南村镇汉溪大道东（延伸段）383号3216房（仅限办公用途）	113.357	23.0125
250	广州市三好计算机科技有限公司	2003-01-29	2024-03-26	Q	84	卫生	广东省	广州市	天河区	广州市天河区天河北路906号2804、2805、2806房（仅限办公用途）	113.351	23.1464
251	广州市三项教学仪器有限公司	2004-10-20	2023-07-10	M	73	研究和试验发展	广东省	广州市	白云区	广州市白云区人和镇大巷村同兴大街5号首层（空港白云）	113.277	23.1621
252	广州网政信息科技有限公司	2011-03-18	2020-05-15	M	73	研究和试验发展	广东省	广州市	番禺区	广州市番禺区市桥街沙圩一云山大街16号B座四楼401	113.388	22.948
253	广州魅视电子科技有限公司	2014-03-11	-	C	39	计算机、通信和其他电子设备制造业	广东省	广州市	白云区	广州市白云区嘉禾街望岗工业区三路33号德汇望岗科技园B栋5楼	113.288	23.2498
254	广州市奥特创通测控技术有限公司	2006-12-13	2018-09-18	M	74	专业技术服务业	广东省	广州市	天河区	广州市天河区广汕二路602号之一首层104房	113.42	23.1965
255	金银卡（广州）生物科技股份有限公司（曾用名：金银卡（广州）生物科技有限公司）	2006-05-29	2020-07-27	M	73	研究和试验发展	广东省	广州市	黄埔区	广州经济技术开发区永和区永盛路25号	113.586	23.2248
256	广州市科马电子有限公司	2008-04-30	2022-12-05	C	39	计算机、通信和其他电子设备制造业	广东省	广州市	番禺区	广州市番禺区钟村街市广路钟三村路段36号之五	113.332	22.9811
257	广东奥迪安监控技术股份有限公司（曾用名：广东奥迪安监控技术有限公司）	2003-04-15	2023-11-13	M	74	专业技术服务业	广东省	广州市	黄埔区	广州市萝岗区广州开发区科学城起云路6号自编一栋四层404-406、408-415房	113.434	23.173
258	广州市网威信息技术有限公司	2006-03-09	2024-02-19	I	65	软件和信息技术服务业	广东省	广州市	天河区	广州市天河区天河北路890号901室（部位：自编902单元）（仅限办公）	113.351	23.1471
259	广州薪火网络科技有限公司	2008-08-09	2023-08-03	M	73	研究和试验发展	广东省	广州市	天河区	广州市天河区岑村圣堂大街14号B座三层3084（仅限办公）	113.39	23.1731
260	广州金南磁性材料有限公司	2009-04-20	2024-02-04	C	39	计算机、通信和其他电子设备制造业	广东省	广州市	增城区	广州市增城增江街经三路8号	113.858	23.2759
261	广东雅华电气有限公司	2002-10-23	2020-03-16	C	38	电气机械和器材制造业	广东省	广州市	黄埔区	广州市黄埔区南云五路11号厂房A栋102房	113.463	23.1512
262	广州澳士朗照明科技有限公司	2011-01-18	2016-11-01	M	73	研究和试验发展	广东省	广州市	番禺区	广州市番禺区南村镇江南村工业区三横路16号	113.377	22.9977
263	广州市利维灯饰有限公司	2003-11-21	2020-07-22	C	38	电气机械和器材制造业	广东省	广州市	白云区	广州市白云区钟落潭大纲领雅园新村一街100号101房	113.372	23.3526
264	广州视景医疗软件有限公司	2008-09-09	2023-10-19	I	65	软件和信息技术服务业	广东省	广州市	天河区	广州市天河区科韵路24-26号南楼第八层801-808房（仅限办公）	113.381	23.1295
265	广州拜尔冷链聚氨酯科技有限公司	1992-05-18	2019-11-05	C	29	橡胶和塑料制品业	广东省	广州市	花都区	广州市花都区狮岭镇山前大道旗新北路口	113.222	23.4839
266	广州华银电子有限公司	2010-02-02	2022-09-15	C	39	计算机、通信和其他电子设备制造业	广东省	广州市	黄埔区	广州市黄埔区荔红一路8号3栋818房	113.511	23.1736
267	广州安朗通信科技有限公司	2009-01-03	2021-04-30	I	65	软件和信息技术服务业	广东省	广州市	天河区	广州市天河区中山大道西89号办公楼（部位:C栋408-409房）（仅限办公用途）	113.363	23.1413
268	广州天绎智能科技股份有限公司（曾用名：广州天绎智能科技有限公司）	2007-04-25	2018-01-22	M	73	研究和试验发展	广东省	广州市	天河区	广州市天河区天河北路30号中810室（仅限办公用途，不可作厂房使用）	113.323	23.1463
269	东软集团（广州）有限公司	2008-09-10	2020-03-10	M	73	研究和试验发展	广东省	广州市	黄埔区	广州市高新技术产业开发区科学城揽月路8号	113.452	23.1674
270	广东新华南方智能科技有限公司（曾用名：广东新华南方软件外包有限公司）	2006-05-18	2023-05-12	I	65	软件和信息技术服务业	广东省	广州市	南沙区	广州市南沙区进港大道20号112房	113.551	22.8063
271	中交四航岩土工程有限公司	1999-02-08	2017-04-25	E	48	土木工程建筑业	广东省	广州市	海珠区	广州市海珠区前进路157号	113.287	23.1067
272	广东天沅智能制造科技有限公司（曾用名：广州天沅橡胶制品有限公司）	2010-11-22	2023-11-30	M	73	研究和试验发展	广东省	广州市	番禺区	广州市番禺区石基镇海涌路115号	113.458	22.9573
273	广州市天工远科计算机科技有限公司	2006-08-23	2023-09-13	I	65	软件和信息技术服务业	广东省	广州市	天河区	广州市天河区天河北路689号1607房（仅限办公）	113.348	23.1474
274	广州市和合医疗设备有限公司	2005-03-22	2023-08-22	C	43	金属制品、机械和设备修理业	广东省	广州市	从化区	广州市从化区鳌头镇幸福大道1号、3号、5号、7号、9号自编1号、2号	113.528	23.5804
275	广州中晶新能源工程有限公司	2010-11-17	2022-03-15	C	39	计算机、通信和其他电子设备制造业	广东省	广州市	白云区	广州市白云区三元里街云城西路722号101房-01（自主申报）	113.271	23.1792
276	广东宜采跨境电商有限公司（曾用名：广东耶萨智能科技有限公司）	2011-07-28	2021-09-30	M	73	研究和试验发展	广东省	广州市	天河区	广州市天河区黄埔大道西100号之一1003室（部位：A）（仅限办公）（不可作厂房使用）	113.342	23.1318
277	广州龙腾出行网络科技有限公司（曾用名：广州新贵通网络科技有限公司）	2005-10-17	2024-04-09	I	65	软件和信息技术服务业	广东省	广州市	天河区	广州市天河区黄埔大道西路76号1511A25房（该场所仅限办公用途）	113.369	23.1304
278	广东美亚旅游科技集团股份有限公司（曾用名：广州美亚电子商务国际旅行社有限公司）	2003-08-11	2024-02-07	G	58	多式联运和运输代理业	广东省	广州市	黄埔区	广州市黄埔区中新广州知识城腾飞一街2号525房	113.502	23.3967
279	广州民航信息技术有限公司	2008-09-28	2023-10-11	I	64	互联网和相关服务	广东省	广州市	黄埔区	广州市白云区云城西路888号绿地中心19层	113.275	23.187
280	广州宏韵医药科技股份有限公司（曾用名：广州蓝韵医药研究有限公司）	2002-08-30	2022-07-07	M	73	研究和试验发展	广东省	广州市	黄埔区	广州高新技术产业开发区科学城掬泉路3号广州国际企业孵化器B区B301号房	113.454	23.1685
281	广州市博汇新材料科技有限公司	2006-09-14	2017-02-27	C	26	化学原料和化学制品制造业	广东省	广州市	番禺区	广州市番禺区番禺大道北555号	113.357	23.0005
282	广州声华科技股份有限公司（曾用名：广州声华科技有限公司）	2000-08-21	2020-10-26	M	73	研究和试验发展	广东省	广州市	黄埔区	广州高新技术产业开发区科学城科研路3号自编A5栋501、502房	113.447	23.176
283	广东达元食品药品安全技术有限公司	2008-09-02	2015-12-30	M	73	研究和试验发展	广东省	广州市	黄埔区	广州高新技术产业开发区科学城开源大道11号A1栋六层	113.442	23.166
284	广州市天意科技股份有限公司（曾用名：广州市天意电子科技有限公司）	1996-09-05	2018-12-19	M	73	研究和试验发展	广东省	广州市	天河区	广州市天河区中山大道路建工路9号4楼A11号	113.379	23.1291
285	广州星晨互联网科技股份有限公司（曾用名：广州嘉瑶软件有限公司）	2010-07-27	2023-03-14	I	64	互联网和相关服务	广东省	广州市	天河区	广州市天河区大灵山路61号第24栋三层B-1308房	113.426	23.1398
286	广州众信实业有限公司	2007-01-17	2014-06-30	F	51	批发业	广东省	广州市	番禺区	广州市番禺区石基镇市莲路南浦村段32号	113.476	22.9679
287	广州潮徽生物科技有限公司（曾用名：广州潮徽化工科技有限公司）	2010-10-20	2024-01-09	M	75	科技推广和应用服务业	广东省	广州市	黄埔区	广州市黄埔区茅岗路848号8楼C098房（仅限办公）	113.446	23.1252
288	广州金邦有色合金有限公司	2006-10-12	2021-11-09	C	32	有色金属冶炼和压延加工业	广东省	广州市	增城区	广州增城新塘镇宁西工业园	113.678	23.2334
289	广州源典科技有限公司	2001-04-10	2022-11-02	M	75	科技推广和应用服务业	广东省	广州市	黄埔区	广州市萝岗区观虹路10号1004房	113.464	23.1734
290	广东明朗智能科技股份有限公司（曾用名：广东明朗生活用品制造厂有限公司）	2000-06-28	2023-08-02	M	73	研究和试验发展	广东省	广州市	番禺区	广州市番禺区石壁街创源路26号	113.308	22.9658
291	广州市家泰环境科技股份有限公司（曾用名：广州市家泰通风设备有限公司）	2009-06-04	2022-07-27	M	73	研究和试验发展	广东省	广州市	黄埔区	广州市黄埔区科丰路31号G1栋322号	113.466	23.1551
292	广汽丰田物流有限公司	2006-12-05	2024-03-06	G	58	多式联运和运输代理业	广东省	广州市	南沙区	广州市南沙区黄阁镇市南大道8号	113.506	22.8405
293	广州市舜世电子信息技术有限公司	2003-08-11	2022-05-09	I	65	软件和信息技术服务业	广东省	广州市	黄埔区	广州经济技术开发区光谱西路3号办公楼一楼北面	113.413	23.1589
294	广东磊蒙智能装备集团有限公司（曾用名：广州市磊蒙机械设备有限公司）	2009-05-04	2024-01-23	C	43	金属制品、机械和设备修理业	广东省	广州市	从化区	广州市从化区鳌头镇龙星村星业路152号	113.452	23.6423
295	广州天宝颂原生物科技开发有限公司	2007-05-31	2021-12-23	M	73	研究和试验发展	广东省	广州市	黄埔区	广州经济技术开发区玉树工业园敬业三街B栋403房	113.44	23.1627
296	广东华晨影视舞台专业工程有限公司	2002-03-14	2022-12-07	E	49	建筑安装业	广东省	广州市	花都区	广州市花都区狮岭镇山前旅游大道新扬18号	113.215	23.4765
297	广州保瑞医疗技术有限公司	2006-08-03	2024-02-07	M	73	研究和试验发展	广东省	广州市	白云区	广州市白云区科园路1号自编1栋4楼	113.342	23.3025
298	广州远信网络科技发展有限公司	2005-05-14	2021-09-01	M	73	研究和试验发展	广东省	广州市	天河区	广州市天河区马场路16号之二3008房	113.35	23.1248
299	广州互通气动机器工程有限公司	1995-10-06	2022-05-20	C	35	专用设备制造业	广东省	广州市	南沙区	广州市南沙区东涌镇新村街2号	113.567	22.7658
300	广州凯路仕自行车运动时尚产业股份有限公司（曾用名：广州凯路仕体育科技有限公司）	2010-04-26	2015-12-31	C	24	文教、工美、体育和娱乐用品制造业	广东省	广州市	黄埔区	广州市黄埔区埔北路2号2栋2楼	113.542	23.1366
301	广州达森灯光股份有限公司（曾用名：广州达森光电科技有限公司）	2010-11-04	2019-03-25	C	38	电气机械和器材制造业	广东省	广州市	花都区	广州市花都区花山镇华侨科技工业园育才路12号	113.224	23.4741
302	广州市一变电气设备有限公司	2005-12-31	2023-05-24	C	38	电气机械和器材制造业	广东省	广州市	番禺区	广州市番禺区石基镇前锋北路9号	113.449	22.9499
303	广州仙海网络科技有限公司	2008-06-06	2021-01-26	I	64	互联网和相关服务	广东省	广州市	天河区	广州市天河区体育西路111-115单号18楼G	113.328	23.1416
304	龙倡（广州）花边有限公司	2000-12-04	2021-08-09	C	17	纺织业	广东省	广州市	番禺区	广州市番禺区石楼镇莲花山莲花西路	113.509	22.9932
305	安婕妤化妆品科技股份有限公司	2002-08-22	2023-03-22	C	26	化学原料和化学制品制造业	广东省	广州市	花都区	广州市花都区新华街花港大道23号	113.154	23.364
306	广州翁般扎信息科技有限公司	2004-07-20	2020-02-19	M	73	研究和试验发展	广东省	广州市	天河区	广州市天河区儒林大街后园路36A座408A房（仅限办公）	113.387	23.1304
307	广州咨元信息科技有限公司	2007-11-20	2022-06-17	M	73	研究和试验发展	广东省	广州市	天河区	广州市天河区中山大道西89号C栋5层501-502房（仅限办公）	113.363	23.1409
308	贝朗（中国）卫浴有限公司（曾用名：广州贝泰卫浴用品有限公司）	2006-07-21	2021-12-02	C	30	非金属矿物制品业	广东省	广州市	番禺区	广州市番禺区沙头街禺山西路363号3号厂房办公楼四楼	113.339	22.9415
309	广东意高能源科技股份有限公司	2002-07-04	2022-11-08	M	73	研究和试验发展	广东省	广州市	番禺区	广州市番禺区东环街番禺大道北555号天安总部中心11号楼202房（不可作厂房使用）	113.375	22.9874
310	广州科凌新技术有限公司	1999-03-30	2015-01-06	M	75	科技推广和应用服务业	广东省	广州市	天河区	广州市天河区中国科学院广州能源研究所五山所区内	113.358	23.1588
311	广州瑞森生物科技股份有限公司（曾用名：广州瑞森生物科技有限公司）	2007-09-21	2021-11-04	M	73	研究和试验发展	广东省	广州市	番禺区	广州市番禺区大龙街市新路新水坑段6号2栋501	113.399	22.9816
312	广东华联软件科技有限公司	2005-06-10	2021-11-29	I	65	软件和信息技术服务业	广东省	广州市	越秀区	广东省广州市越秀区盘福路医国后街1号大院自编1号901房	113.289	23.1309
313	广东希普生物科技股份有限公司	1998-06-23	2023-12-01	C	26	化学原料和化学制品制造业	广东省	广州市	从化区	广州市从化区鳌头镇广韶路153号C3厂房	113.426	23.6609
314	广州粤能信息技术有限公司	2010-06-18	2020-07-10	I	65	软件和信息技术服务业	广东省	广州市	越秀区	广州市越秀区东风东路836号东峻广场3座33楼	113.313	23.1376
315	广州万方计算机科技有限公司	2008-05-30	2023-08-13	M	73	研究和试验发展	广东省	广州市	天河区	广州市番禺区大学城智慧谷A5座305	113.42	23.0353
316	广州汇卓科技有限公司	1994-08-23	2019-06-17	I	65	软件和信息技术服务业	广东省	广州市	越秀区	广州市越秀区寺右一马路18号1111室	113.315	23.1264
317	广州方邦电子股份有限公司（曾用名：广州方邦电子有限公司）	2010-12-15	2024-02-29	C	39	计算机、通信和其他电子设备制造业	广东省	广州市	黄埔区	广州市黄埔区东枝路28号	113.487	23.1875
318	广东乐源数字技术有限公司	2011-05-13	2019-06-27	I	65	软件和信息技术服务业	广东省	广州市	黄埔区	广州市黄埔区开源大道11号企业加速器C3栋5楼	113.503	23.1597
319	广州力麒智能科技有限公司	2001-10-24	2023-04-13	C	39	计算机、通信和其他电子设备制造业	广东省	广州市	黄埔区	广州市黄埔区尖塔山路5号1层118单元	113.448	23.1746
320	广东天海花边有限公司	2003-02-28	2021-02-02	C	17	纺织业	广东省	广州市	黄埔区	广州经济技术开发区联广路213号	113.535	23.1264
321	广州闪购软件服务有限公司	2010-10-26	2021-07-15	I	65	软件和信息技术服务业	广东省	广州市	黄埔区	广州高新技术产业开发区科学城科学大道162号创意大厦B2栋第5层502单元	113.457	23.1696
322	广州市真地信息技术有限公司	2008-05-14	2021-06-30	I	65	软件和信息技术服务业	广东省	广州市	天河区	广州市天河区五山路246、248、250号1202自编1203A部位（仅限办公）	113.353	23.1495
323	广州市德夫人电器股份有限公司	2010-08-12	2015-02-11	C	38	电气机械和器材制造业	广东省	广州市	黄埔区	广州市高新技术产业开发区科学城天泰一路2号自编四栋四楼全层	113.471	23.1674
324	广州市视鹰电子有限公司	2009-02-16	2022-04-28	F	52	零售业	广东省	广州市	天河区	广州市天河区儒林大街后园路38号106房A82（仅限办公）	113.387	23.1304
325	广东颐衡通讯技术发展股份有限公司	1997-10-17	2023-12-20	F	51	批发业	广东省	广州市	海珠区	广州市萝岗区开发区科学城科学大道33号B栋生产实验楼三层302房	113.432	23.1725
326	广州齐志生物工程设备有限公司	2008-06-11	2022-02-25	C	35	专用设备制造业	广东省	广州市	黄埔区	广州经济技术开发区隧达街11号生产车间一	113.546	23.1805
327	广州谷得网络科技有限公司	2011-03-01	2023-06-28	M	73	研究和试验发展	广东省	广州市	天河区	广州市天河区棠下荷光三横路7号之一	113.38	23.1421
328	广州市金色彩文化创意有限公司	1999-06-07	2021-06-10	L	72	商务服务业	广东省	广州市	越秀区	广州市越秀区环市东路360号珠江大厦东座5楼514P	113.291	23.1432
329	广州宇洋智能科技有限公司	2008-08-13	2019-03-28	M	73	研究和试验发展	广东省	广州市	黄埔区	广州经济技术开发区南翔支路1号自编三栋C501-B	113.456	23.1615
330	广州美维电子有限公司	2006-08-15	2023-05-10	C	39	计算机、通信和其他电子设备制造业	广东省	广州市	黄埔区	广州市高新技术产业开发区科学城新乐路一号	113.475	23.1652
331	广州诚鼎机器人有限公司（曾用名：广州诚鼎纺织机械有限公司）	2006-11-22	2023-07-21	C	35	专用设备制造业	广东省	广州市	番禺区	广州市番禺区钟村街诚鼎街8号101	113.307	22.9696
332	广州中大微电子有限公司	2010-03-10	2021-08-13	M	73	研究和试验发展	广东省	广州市	黄埔区	广州市黄埔区开源大道136号B2栋1101室、B2栋1102室	113.513	23.1606
333	广州市花都全球自动变速箱有限公司	2000-03-31	2023-06-27	C	36	汽车制造业	广东省	广州市	花都区	广州市花都区107国道铁道桥西侧A幢	113.277	23.2243
334	京信网络系统股份有限公司（曾用名：京信通信系统（中国）有限公司）	2003-09-29	2023-12-28	C	39	计算机、通信和其他电子设备制造业	广东省	广州市	黄埔区	广州经济技术开发区广州科学城神舟路10号	113.439	23.1759
335	广州汇豪计算机科技开发有限公司	2006-11-24	2020-03-30	M	73	研究和试验发展	广东省	广州市	黄埔区	广州市黄埔区敏兴街11号305房	113.487	23.1875
336	广州尚融网络科技有限公司	2008-12-10	2021-06-11	I	65	软件和信息技术服务业	广东省	广州市	黄埔区	广州高新技术产业开发区科学城科学大道182号创新大厦C3区第7层701单元	113.462	23.172
337	广州市彩蝶节能技术有限公司	2001-12-12	2017-05-26	M	73	研究和试验发展	广东省	广州市	荔湾区	广州市荔湾区荷景南路23号自编1栋A301	113.254	23.0614
338	广州一品红制药有限公司	2010-07-16	2023-08-07	C	27	医药制造业	广东省	广州市	黄埔区	广州市经济技术开发区东区东博路6号	113.508	23.1497
339	中标联检验检测认证集团有限公司（曾用名：广州中标联检验认证技术开发有限公司）	2003-12-26	2020-12-24	M	74	专业技术服务业	广东省	广州市	黄埔区	广州市黄埔区香雪八路98号F栋1201房、F栋1202房	113.503	23.1836
340	广州和仕康生物技术有限公司	2010-03-15	2021-11-16	M	73	研究和试验发展	广东省	广州市	黄埔区	广州市黄埔区起云路8号5栋402房（仅限办公）	113.435	23.1738
341	广州润芯信息技术有限公司	2008-01-21	2024-04-01	M	73	研究和试验发展	广东省	广州市	黄埔区	广州市黄埔区南翔二路23号5栋605、625、631房	113.46	23.1599
342	广州市三泰汽车内饰材料有限公司	2007-10-24	2022-08-24	C	36	汽车制造业	广东省	广州市	增城区	广州市增城区宁西街新和北路63号	113.64	23.196
343	广州市升日科技有限公司	2000-04-11	2020-08-03	I	65	软件和信息技术服务业	广东省	广州市	天河区	广州市天河区龙口西路67号1110房（仅限办公用途）	113.342	23.1421
344	广州市联冠机械有限公司	2003-06-05	2022-06-17	C	35	专用设备制造业	广东省	广州市	番禺区	广州市番禺区大龙街新桥泰安路西六横街4号	113.423	22.9569
345	广州市科城测绘技术有限公司	2011-08-11	2017-12-27	M	73	研究和试验发展	广东省	广州市	白云区	广州市白云区云城南二路167号210房	113.271	23.1784
346	广州东港安全印刷有限公司	2007-03-12	2023-10-10	M	73	研究和试验发展	广东省	广州市	黄埔区	广州市高新技术产业开发区科学城南云五路5号	113.459	23.1487
347	广州星辰热能股份有限公司（曾用名：广州星辰热能科技有限公司）	2008-02-21	2021-04-27	M	73	研究和试验发展	广东省	广州市	海珠区	广州市海珠区敦和路189号大院第1栋自编403房	113.326	23.0944
348	广东遂芯源精密智能制造有限公司（曾用名：广州遂联自动化设备有限公司）	2007-02-15	2023-05-04	C	40	仪器仪表制造业	广东省	广州市	番禺区	广州市番禺区大石街会江村石北工业大道会江段10号201	113.301	23.0159
349	广州市力侬照明技术有限公司	2001-01-16	2021-11-29	C	38	电气机械和器材制造业	广东省	广州市	白云区	广州市白云区北太路1633号广州民营科技园科颖路4号	113.341	23.3015
350	广州市炬元互联网科技有限公司（曾用名：广州市炬元通讯技术有限公司）	2003-03-31	2021-12-30	I	65	软件和信息技术服务业	广东省	广州市	黄埔区	广州市黄埔区科学大道111号主楼404-1房	113.445	23.1721
351	广州万惠金控科技股份有限公司（曾用名：广州市天锐科技股份有限公司）	2000-09-12	2020-11-05	M	73	研究和试验发展	广东省	广州市	天河区	广州市天河区珠江东路12号3401房之自编06单元	113.334	23.1253
352	广州春晓信息科技有限公司	2006-03-27	2022-03-16	I	65	软件和信息技术服务业	广东省	广州市	番禺区	广州市番禺区市桥街大北路403号一期501室	113.373	22.9441
353	广东宏大欣电子科技有限公司（曾用名：广州市宏大欣电子科技有限公司）	2007-05-24	2023-09-13	M	74	专业技术服务业	广东省	广州市	越秀区	广州市越秀区东风中路437号1905房（不可作厂房使用）	113.279	23.1375
354	广州泛美实验室系统科技股份有限公司（曾用名：广州市泛美实业有限公司）	2004-11-05	2023-07-17	M	73	研究和试验发展	广东省	广州市	黄埔区	广州市黄埔区开源大道11号B8栋第二层（部位：264室）	113.502	23.1594
355	广州丰泰美华电缆有限公司	2007-05-09	2023-09-26	C	38	电气机械和器材制造业	广东省	广州市	黄埔区	广州高新技术产业开发区科学城开达路2号	113.485	23.1609
356	广州博冠光电科技股份有限公司	2000-07-17	2023-09-25	M	73	研究和试验发展	广东省	广州市	黄埔区	广州市高新技术产业开发区科学城开源大道11号A5栋第三层A单元	113.502	23.1594
357	广州市行心信息科技有限公司	2011-01-07	2022-04-08	M	73	研究和试验发展	广东省	广州市	黄埔区	广州市黄埔区水西路32号1102、1103房	113.481	23.1874
358	广州市珠江机床厂有限公司	1998-07-30	2023-05-23	C	34	通用设备制造业	广东省	广州市	番禺区	广州市番禺区大龙街金禺西街77号207	113.39	22.9562
359	广州弥特智能科技有限公司（曾用名：广州弥特软件科技有限公司）	2006-04-07	2023-01-29	M	73	研究和试验发展	广东省	广州市	黄埔区	广州市黄埔区西成中街10号B栋601房（仅限办公）	113.516	23.0834
360	广州集睿科技信息咨询有限公司	2010-10-25	2023-11-13	M	75	科技推广和应用服务业	广东省	广州市	黄埔区	广州市黄埔区东源路29号203室	113.506	23.1318
361	广州市高衡力科技股份有限公司（曾用名：广州市高衡力节能科技股份有限公司）	2009-12-29	2023-09-20	M	75	科技推广和应用服务业	广东省	广州市	天河区	广州市天河区黄埔大道西路108号1310房自编C室、1311房自编A室	113.373	23.1403
362	广州天极电子科技股份有限公司（曾用名：广州天极电子科技有限公司）	2011-07-26	2023-12-25	C	39	计算机、通信和其他电子设备制造业	广东省	广州市	南沙区	广州市南沙区东涌镇昌利路六街6号	113.479	22.887
363	广州市韦科流体控制设备股份有限公司（曾用名：广州市韦科智能阀门有限公司）	2010-08-05	2023-12-18	C	34	通用设备制造业	广东省	广州市	天河区	广州市天河区田头岗工业区二大道一横路2号自编B栋B301	113.42	23.1738
364	超音速人工智能科技股份有限公司（曾用名：广州超音速自动化科技有限公司）	2010-07-02	2024-02-27	M	73	研究和试验发展	广东省	广州市	番禺区	广州市番禺区石基镇金山村华创动漫产业园B10栋	113.431	22.9998
365	广州市亮艺照明设备有限公司	2010-05-31	2021-11-29	C	38	电气机械和器材制造业	广东省	广州市	花都区	广州市花都区望岗路2号3栋301铺（部位：304铺）	113.204	23.3767
366	广州市丰华生物股份有限公司（曾用名：广州市丰华生物工程有限公司）	1999-01-08	2022-11-30	M	73	研究和试验发展	广东省	广州市	黄埔区	广州经济技术开发区银谊街6号	113.522	23.0651
367	广州市宏希太阳能设备有限公司	2007-12-19	2023-11-30	C	38	电气机械和器材制造业	广东省	广州市	从化区	广州市从化区明珠工业园区明珠大道中88号	113.546	23.5968
368	广州市新雳电子科技有限公司	2006-03-16	2022-01-06	M	73	研究和试验发展	广东省	广州市	增城区	广州市增城新塘镇汇纺路１号一幢１６０２房（不可作厂房使用）	113.621	23.1308
369	广州览讯科技开发有限公司	1999-12-17	2020-04-17	C	34	通用设备制造业	广东省	广州市	白云区	广州市白云区江高镇双岗村西北地段珠水路边厂房新广花路8号	113.237	23.3311
370	广州誉发纺织科技有限公司	2003-04-02	2017-06-14	M	73	研究和试验发展	广东省	广州市	番禺区	广州市番禺区南村镇坑头工业区西线路29号	113.4	22.9942
371	广东光大信息科技股份有限公司（曾用名：广州市光大软件技术有限公司）	1995-08-11	2023-03-06	I	65	软件和信息技术服务业	广东省	广州市	黄埔区	广州市萝岗区科学城彩频路7号之一402部位	113.442	23.1694
372	广州珂宁化工科技有限公司	2008-05-12	2023-11-24	M	73	研究和试验发展	广东省	广州市	天河区	广州市天河区大观中路492号广东岭南职业技术学院科技中心三楼B301-07室（仅限办公用途）	113.423	23.1743
373	欧佳智造（广东）技术有限公司（曾用名：广州欧佳机电技术有限公司）	2007-08-30	2023-03-15	C	40	仪器仪表制造业	广东省	广州市	白云区	广州市白云区鹤龙一路983号北塔16楼	113.278	23.2309
374	广州市易度软件开发有限公司	2011-02-12	2023-04-18	M	73	研究和试验发展	广东省	广州市	天河区	广州市天河区软件路11号503室E区14号（仅限办公）	113.419	23.1773
375	广州山页信息控制有限公司	2000-11-10	2020-06-30	I	65	软件和信息技术服务业	广东省	广州市	天河区	广州市天河区吉山英君路1号1栋206	113.432	23.1351
376	广州九恒新能源有限公司	2007-11-30	2020-03-02	M	73	研究和试验发展	广东省	广州市	番禺区	广州市番禺区市桥街西丽南路99号1层28号	113.361	22.9424
377	广州华银医学检验中心有限公司	2009-06-03	2022-09-22	M	74	专业技术服务业	广东省	广州市	黄埔区	广州高新技术产业开发区科学城揽月路80号广州科技创新基地A区第3层304-306、307-319单元	113.457	23.1662
378	广州泽力医药科技有限公司	2004-10-26	2023-02-06	M	73	研究和试验发展	广东省	广州市	黄埔区	广州高新技术产业开发区科学城风信路科信街6号	113.43	23.1779
379	广州大台农饲料有限公司	2006-12-25	2023-06-12	C	13	农副食品加工业	广东省	广州市	从化区	广东从化经济开发区高技术产业园高湖路5号	113.517	23.4523
380	广州柏睿光电科技有限公司	2010-12-10	2018-10-25	C	39	计算机、通信和其他电子设备制造业	广东省	广州市	南沙区	广州市南沙区东涌镇万泰路49号(8号厂房)401	113.409	22.8926
381	广州市番禺奥莱照明电器有限公司	1999-08-23	2023-08-14	C	38	电气机械和器材制造业	广东省	广州市	番禺区	广州市番禺区化龙镇金盛一路1号(办公楼厂房）	113.462	22.9999
382	长兴（广州）光电材料有限公司	2006-12-28	2024-03-28	C	39	计算机、通信和其他电子设备制造业	广东省	广州市	黄埔区	广州高新技术产业开发区科学城瑞和路8号	113.515	23.1559
383	广东新岸线科技有限公司（曾用名：广东新岸线计算机系统芯片有限公司）	2010-04-20	2022-03-02	C	39	计算机、通信和其他电子设备制造业	广东省	广州市	番禺区	广州市番禺区南村镇汇智三路25号1601-1611房，1701-1711房	113.352	23.0119
384	广东汇卡商务服务有限公司	2010-02-10	2023-09-20	L	72	商务服务业	广东省	广州市	天河区	广州市天河区科韵中路213号（怡祥盛达创新园H栋北区）409	113.382	23.1385
385	广州南方电力技术工程有限公司（曾用名：广州南方电力集团技术有限公司）	2002-05-31	2023-12-07	E	49	建筑安装业	广东省	广州市	海珠区	广州市海珠区泰沙路80号	113.292	23.0881
386	广州亚虎电力有限公司	2000-03-02	2022-06-22	D	44	电力、热力生产和供应业	广东省	广州市	天河区	广州市天河区吉山新路街自编24号2栋二单元二楼C160房	113.438	23.1327
387	广东盛瑞科技股份有限公司（曾用名：广东盛瑞土建科技发展有限公司）	2010-06-24	2024-02-08	M	73	研究和试验发展	广东省	广州市	番禺区	广州市番禺区石楼镇创启路63号（创新1号楼）C5-2单元	113.466	22.9832
388	广东海虹药通电子商务有限公司	2001-04-20	2023-09-13	I	65	软件和信息技术服务业	广东省	广州市	越秀区	广州市越秀区沿江中路298号中区2501、2512室	113.285	23.1209
389	广州力柏能源科技有限公司	2010-08-02	2022-01-21	M	73	研究和试验发展	广东省	广州市	黄埔区	广州市黄埔区光谱东路238号B栋2层	113.494	23.1589
390	广州西奥多电气设备有限公司	2002-11-20	2024-02-02	C	38	电气机械和器材制造业	广东省	广州市	黄埔区	广州中新广州知识城凤凰三横路63号	113.507	23.3951
391	广州星亚高新塑料科技股份有限公司（曾用名：广州市星亚塑料管道有限公司）	2000-01-03	2019-05-05	C	29	橡胶和塑料制品业	广东省	广州市	从化区	广州市从化区江埔街从樟一路1088号	113.672	23.5199
392	广州宁武科技股份有限公司（曾用名：广州宁武汽车技术有限公司）	2005-01-10	2020-06-11	C	35	专用设备制造业	广东省	广州市	黄埔区	广州经济技术开发区永和经济区春分路9号	113.582	23.2077
393	广州市擎天柱网络科技有限公司	2010-04-14	2024-01-23	I	64	互联网和相关服务	广东省	广州市	天河区	广州市天河区科韵路24-26号北楼第八层809房	113.381	23.1295
394	广东邦鑫数据科技股份有限公司（曾用名：广州邦鑫勘测科技有限公司）	2004-02-17	2024-03-25	I	65	软件和信息技术服务业	广东省	广州市	海珠区	广州市海珠区凤浦中路679号1405房	113.37	23.1024
395	广州杰创信息科技有限公司	2018-12-04	2021-09-15	I	65	软件和信息技术服务业	广东省	广州市	天河区	广州市天河区东圃陂东路22号296室	113.406	23.1255
396	广东一川传媒科技有限公司（曾用名：广东龙坤传媒科技有限公司）	2007-12-17	2023-03-07	M	75	科技推广和应用服务业	广东省	广州市	天河区	广州市天河区金穗路62号2402房（仅限办公）	113.33	23.1292
397	广州中臣碧阳科技集团有限公司（曾用名：广州中臣碧阳船舶科技有限公司）	2010-01-11	2020-07-15	M	73	研究和试验发展	广东省	广州市	番禺区	广州市番禺区南村镇坑头村东线路二横路3号101	113.402	22.9894
398	广州傲胜人造草股份有限公司（曾用名：广州傲胜人造草有限公司）	2000-11-29	2023-11-06	C	19	皮革、毛皮、羽毛及其制品和制鞋业	广东省	广州市	黄埔区	广州经济技术开发区东区骏达路19号	113.528	23.1459
399	广东彩惠智能科技有限公司	2008-03-31	2022-03-23	M	73	研究和试验发展	广东省	广州市	越秀区	广州市越秀区应元路34,36号3层	113.275	23.1412
400	广东富胜照明科技有限公司（曾用名：广州市富胜照明灯具科技有限公司）	2009-10-27	2023-02-20	C	38	电气机械和器材制造业	广东省	广州市	番禺区	广州市番禺区大龙街市莲路沙涌村段78号2栋101-105	113.432	22.9601
401	广州汉狮建筑材料科技有限公司	2008-04-03	2021-12-22	M	73	研究和试验发展	广东省	广州市	番禺区	广州市番禺区钟村街谢村狮岗工业区之一号	113.32	22.9661
402	广州保亮得塑料科技有限公司	2007-05-31	2023-05-17	M	73	研究和试验发展	广东省	广州市	南沙区	广州市南沙区榄核镇万安村榄北路110号B2-302房	113.352	22.8816
403	广东电研锅炉压力容器检验中心有限公司	2003-05-20	2022-05-24	M	74	专业技术服务业	广东省	广州市	越秀区	广州市黄埔区科研路11号3楼	113.448	23.1774
404	广东华路交通科技有限公司	2002-03-20	2023-12-05	M	74	专业技术服务业	广东省	广州市	白云区	广东省广州市白云区丛云路399号	113.301	23.2161
405	广州市新锘威智能科技有限公司	2010-10-12	2016-05-03	M	73	研究和试验发展	广东省	广州市	天河区	广州市天河区东站路1号东站综合楼3楼B区C063房	113.331	23.1548
406	广州西奥多冷热设备有限公司	2009-06-01	2021-10-21	C	34	通用设备制造业	广东省	广州市	黄埔区	广州中新广州知识城凤凰三横路63号三楼	113.507	23.3951
407	广州粤嵌通信科技股份有限公司	2011-11-07	2022-08-19	M	73	研究和试验发展	广东省	广州市	黄埔区	广州市黄埔区水西路30号1008房	113.481	23.1872
408	广州建软科技股份有限公司（曾用名：广州建软软件技术有限公司）	2007-04-19	2023-04-24	M	73	研究和试验发展	广东省	广州市	天河区	广州市天河区思成路23号宏太智慧谷七号楼2楼自编240A房	113.423	23.18
409	广州双友电子技术有限公司	2006-11-24	2023-09-22	M	73	研究和试验发展	广东省	广州市	天河区	广州市天河区广汕二路13号三楼D区1房	113.408	23.1996
410	广州朗晏信息技术有限公司（曾用名：广州菁英信息技术有限公司）	2010-03-08	2018-10-16	I	65	软件和信息技术服务业	广东省	广州市	天河区	广州市天河区天河软件园建中路51-53号新太科技大厦606B室	113.379	23.1305
411	广东智源信息技术有限公司	2004-10-22	2024-01-12	I	64	互联网和相关服务	广东省	广州市	越秀区	广州市越秀区下塘西路37号803室	113.28	23.1505
412	广东文穗智能装备股份有限公司（曾用名：广州市文穗塑料机械有限公司）	2003-11-06	2021-10-18	C	35	专用设备制造业	广东省	广州市	番禺区	广州市番禺区大龙街茶东东兴路36号	113.421	22.9751
413	广州市朗辰电子科技有限公司	2011-06-13	2021-12-06	M	73	研究和试验发展	广东省	广州市	黄埔区	广州高新技术产业开发区科学城掬泉路3号广州国际企业孵化器D区D204-209	113.453	23.1689
414	广东德和通信设备有限公司	1994-08-18	2016-09-01	C	39	计算机、通信和其他电子设备制造业	广东省	广州市	番禺区	广州市番禺区石基镇市莲路永善村段73号	113.467	22.9633
415	广东合赢教育科技股份有限公司（曾用名：广州合赢教学设备有限公司）	2006-11-16	2020-08-13	M	73	研究和试验发展	广东省	广州市	黄埔区	广州市黄埔区云埔工业区观达路20号园区4栋M层西侧	113.55	23.1586
416	广州亚普机电设备科技有限公司	2009-04-13	2022-12-19	M	73	研究和试验发展	广东省	广州市	白云区	广州市白云区龙归街园夏牌坊大街68号203室	113.279	23.1643
417	广州市纬志电子科技有限公司	2009-05-08	2022-02-11	C	39	计算机、通信和其他电子设备制造业	广东省	广州市	黄埔区	广州经济技术开发区西区东晖广场沿河路1号B区五层车间	113.524	23.0761
418	广东卓信环境科技股份有限公司（曾用名：广东卓信水处理设备有限公司）	1999-07-22	2023-03-23	N	77	生态保护和环境治理业	广东省	广州市	番禺区	广州市番禺区番禺大道北555号番禺节能科技园内天安科技交流中心709、710号房	113.374	22.9862
419	广州智航电子科技有限公司	2006-04-19	2018-09-30	C	39	计算机、通信和其他电子设备制造业	广东省	广州市	黄埔区	广州经济技术开发区永和经济区新业路46号自编20栋101单元、201单元、301单元	113.614	23.1259
420	广州南盾通讯设备有限公司	2006-07-14	2020-12-25	C	39	计算机、通信和其他电子设备制造业	广东省	广州市	从化区	广东从化经济开发区高技术产业园新一路13号	113.498	23.4528
421	广州市市政集团有限公司	1984-05-02	2023-07-04	E	48	土木工程建筑业	广东省	广州市	越秀区	广州市越秀区环市东路338号	113.289	23.1439
422	广东锐捷安全技术股份有限公司	2008-08-01	2020-08-05	M	73	研究和试验发展	广东省	广州市	番禺区	广州市番禺区桥南街蚬涌村工业区（7号E型厂房）	113.398	22.9203
423	广州金凯新材料有限公司	2006-01-10	2021-11-26	C	33	金属制品业	广东省	广州市	黄埔区	广州高新技术产业开发区科学城科丰路31号华南新材料创新园G1栋1005号	113.466	23.1551
424	广州海晏信息技术有限公司（曾用名：广州九游信息技术有限公司）	2010-04-09	2023-01-06	I	65	软件和信息技术服务业	广东省	广州市	天河区	广州市天河区天河软件园建中路51-53号新太科技大厦606A室	113.379	23.1305
425	快优智能技术有限公司（曾用名：广州市东岘源电子科技有限公司）	2002-11-05	2023-09-14	M	73	研究和试验发展	广东省	广州市	黄埔区	广州高新技术产业开发区科学大道112号A1栋902A	113.438	23.17
426	广州星唯信息科技有限公司	2007-03-27	2023-03-31	I	65	软件和信息技术服务业	广东省	广州市	天河区	广州市天河区思成路35号1单元801-37室	113.428	23.1836
427	广东安居宝智能控制系统有限公司	2011-11-07	2016-07-05	C	39	计算机、通信和其他电子设备制造业	广东省	广州市	黄埔区	广州高新技术开发区科学城起云路6号二栋四楼	113.434	23.1725
428	广州飞锐网络科技有限公司	2007-07-12	2022-11-02	I	65	软件和信息技术服务业	广东省	广州市	南沙区	广州市南沙区黄阁镇蕉西路134号301房A3009（仅限办公）	113.539	22.8106
429	广州腾龙健康实业股份有限公司（曾用名：广州腾龙电子塑胶科技有限公司）	2006-12-01	2022-12-12	C	39	计算机、通信和其他电子设备制造业	广东省	广州市	黄埔区	广州经济技术开发区永和经济区永盛路19号	113.584	23.2276
430	广州如加网络科技有限公司	2010-05-24	2022-09-26	M	73	研究和试验发展	广东省	广州市	天河区	广州市天河区天河北路898号16层1612-1616（仅限办公用途）	113.352	23.1471
431	广州指点网络科技有限公司	2011-07-13	2023-03-29	M	73	研究和试验发展	广东省	广州市	天河区	广州市天河区黄埔大道西120号高志大厦14层ABCDE单元（仅限办公用途）	113.347	23.1316
432	广州优百特科技有限公司（曾用名：广州市优百特饲料科技有限公司）	2007-12-21	2024-04-10	M	73	研究和试验发展	广东省	广州市	增城区	广州市增城区宁西街朱宁路22号	113.671	23.2308
433	广州市奥迪诗音响科技有限公司	2000-04-03	2020-08-12	C	39	计算机、通信和其他电子设备制造业	广东省	广州市	白云区	广州市白云区新市镇石马工业区	113.257	23.2586
434	广州柏赛罗药业有限公司	1995-11-29	2020-12-31	C	27	医药制造业	广东省	广州市	黄埔区	广州市黄埔区观达路20号自编二栋四楼403房	113.55	23.1586
435	广东省珠峰电气股份有限公司（曾用名：广州市珠峰电气有限公司）	2004-05-28	2024-01-16	C	39	计算机、通信和其他电子设备制造业	广东省	广州市	花都区	广州市花都区镜湖大道2号云峰商业大厦301、302、304、305室	113.254	23.3862
436	广州市贝法易信息科技有限公司（曾用名：广州市贝法易商贸有限公司）	2005-07-04	2022-08-02	G	58	多式联运和运输代理业	广东省	广州市	黄埔区	广州市黄埔区黄埔大道东840号2403房2404房（仅限办公）	113.476	23.1017
437	广州市畅运信息科技有限公司	2009-11-11	2020-07-27	M	73	研究和试验发展	广东省	广州市	番禺区	广州市番禺区大石街富石路496号新兴广场6栋206房	113.315	23.0165
438	广州移淘网络科技有限公司	2011-08-04	2019-11-05	M	73	研究和试验发展	广东省	广州市	越秀区	广州市越秀区先烈中路81号大院117，118号首层自编02-A17房	113.305	23.1478
439	广东伊顿母线有限公司	2008-04-11	2023-01-12	C	38	电气机械和器材制造业	广东省	广州市	天河区	广州市天河区岑村圣堂大街14号B座三层B183（仅限办公）（不可作厂房使用）	113.39	23.1731
440	广州博恩能源有限公司（曾用名：广州市博恩生物能源有限公司）	2009-10-22	2023-01-03	C	34	通用设备制造业	广东省	广州市	白云区	广州市白云区北太路1633号广州民营科技园科盛路8号配套服务大楼B508-1房	113.342	23.302
441	广州一康医疗设备实业有限公司	2000-09-30	2023-04-18	C	39	计算机、通信和其他电子设备制造业	广东省	广州市	南沙区	广州市南沙区南沙街兴沙路6号1504房（仅限办公）	113.614	22.78
442	广州市嘉特斯机电制造有限公司	1998-07-20	2024-03-08	C	34	通用设备制造业	广东省	广州市	花都区	广州市花都区狮岭镇山前大道南	113.223	23.4891
443	广东东篱环境股份有限公司（曾用名：广州市东篱环境艺术有限公司）	2000-07-17	2023-09-18	N	78	公共设施管理业	广东省	广州市	天河区	广东省广州市天河区体育西路191号B塔3822房	113.328	23.1461
444	广州市鹰盟电子科技有限公司	2007-06-26	2020-04-30	C	39	计算机、通信和其他电子设备制造业	广东省	广州市	番禺区	广州市番禺区石楼镇潮田工业区嵩山路31号	113.486	22.967
445	广州电缆厂有限公司	1981-06-17	2023-01-16	C	38	电气机械和器材制造业	广东省	广州市	南沙区	广州市南沙区榄核镇榄张路51号	113.34	22.8422
446	广州市紫晶通信科技有限公司	2003-07-22	2019-10-24	M	73	研究和试验发展	广东省	广州市	越秀区	广州市越秀区先烈中路85号4层自编A座A区	113.306	23.1488
447	广州温雅日用化妆品有限公司	1999-08-11	2021-01-04	C	26	化学原料和化学制品制造业	广东省	广州市	黄埔区	广州经济技术开发区永和经济区田园西路39号	113.55	23.2035
448	广州埃信电信设备有限公司	2002-07-23	2022-10-11	C	39	计算机、通信和其他电子设备制造业	广东省	广州市	天河区	广州市天河区高普路83号A栋206房	113.418	23.1924
449	广州市科灵智能技术有限公司（曾用名：广州市科灵电子工程有限公司）	1993-08-16	2024-01-04	E	49	建筑安装业	广东省	广州市	天河区	广州市天河区中山大道建工路13、15号505房	113.379	23.1288
450	南方电网数字电网集团信息通信科技有限公司（曾用名：广州电力通信网络有限公司）	1999-08-30	2024-02-28	E	49	建筑安装业	广东省	广州市	黄埔区	广州市黄埔区光谱中路11号2栋3单元12层全层	113.451	23.1655
451	广州市吉池环保科技有限公司	2008-07-29	2020-11-25	M	73	研究和试验发展	广东省	广州市	黄埔区	广州市黄埔区黄埔东路3642号6栋506	113.545	23.0979
452	广州市双石金属制品有限公司（曾用名：广州市番禺双石钛金厂）	1995-03-15	2023-05-25	C	33	金属制品业	广东省	广州市	番禺区	广州市番禺区大石街涌口村工业区	113.337	23.0281
453	广州泰瑞捷电子科技有限公司	2006-04-21	2021-05-19	M	73	研究和试验发展	广东省	广州市	海珠区	广州市海珠区南边路38号之十九204室（仅限办公）	113.268	23.0842
454	广州智天电子科技有限公司	2004-04-21	2021-10-19	M	73	研究和试验发展	广东省	广州市	番禺区	广州市番禺区钟村街福华路15号902房	113.341	22.9769
455	广州瑞通生物科技有限公司	2010-04-20	2023-10-17	M	73	研究和试验发展	广东省	广州市	黄埔区	广州市黄埔区国际生物岛螺旋三路29号四楼402房、五楼501房、502房	113.376	23.0674
456	广州海昇计算机科技有限公司	2006-04-30	2022-10-18	I	65	软件和信息技术服务业	广东省	广州市	黄埔区	广州高新技术产业开发区科学城广州国际企业孵化器孵化楼（D）区D403房	113.442	23.166
457	广州华立科技股份有限公司（曾用名：广州华立科技有限公司）	2010-08-20	2024-03-26	C	39	计算机、通信和其他电子设备制造业	广东省	广州市	番禺区	广州市番禺区石碁镇莲运二横路28号（1-8层）	113.458	22.9486
458	广州琪原新材料股份有限公司（曾用名：广州琪原新材料有限公司）	2010-03-19	2023-11-03	C	26	化学原料和化学制品制造业	广东省	广州市	黄埔区	广州高新技术产业开发区科学城开源大道11号B8栋首层	113.442	23.166
459	赛邦金属包装集团有限公司（曾用名：广州赛邦印铁制罐有限公司）	1997-06-05	2023-05-26	C	36	汽车制造业	广东省	广州市	增城区	广州市增城朱村街朱村大道中7号	113.732	23.2815
460	广州迪澳生物科技有限公司	2008-06-23	2021-11-10	M	73	研究和试验发展	广东省	广州市	黄埔区	广州市黄埔区科丰路31号G7栋401	113.464	23.1558
461	广州市冠浩机械设备有限公司	2006-09-01	2023-06-29	C	38	电气机械和器材制造业	广东省	广州市	南沙区	广州市南沙区东涌镇马克村海堤街2号102室	113.444	22.8449
462	广州市东鹏食品饮料有限公司	2006-04-05	2020-05-07	C	15	酒、饮料和精制茶制造业	广东省	广州市	增城区	广州市增城石滩镇三江荔三路750号	113.864	23.1919
463	广州南方卫星导航仪器有限公司	2009-08-05	2023-09-04	M	73	研究和试验发展	广东省	广州市	天河区	广州市天河区思成路39号4楼A区、5楼A区、6楼A区	113.429	23.1852
464	广东博纬通信科技有限公司	2010-12-22	2023-03-23	C	39	计算机、通信和其他电子设备制造业	广东省	广州市	黄埔区	广州市黄埔区云埔一路29号之二	113.551	23.1515
465	广州市德晟光电科技股份有限公司（曾用名：广州市德晟照明实业有限公司）	2009-03-12	2024-03-28	C	38	电气机械和器材制造业	广东省	广州市	花都区	广州市花都区新华街九谭新华工业区新都大道168号b3栋厂房第5层之一（可作厂房使用）	113.176	23.4042
466	广州普正生物科技有限公司	2005-07-29	2022-04-28	C	14	食品制造业	广东省	广州市	黄埔区	广州高新技术产业开发区香山路17号厂房B六层2号	113.446	23.1856
467	广州万将网络科技有限公司	2010-10-14	2017-11-01	M	73	研究和试验发展	广东省	广州市	天河区	广州市天河区中山大道建中路3号301部位	113.379	23.1343
468	广州康艺电子有限公司	1999-12-16	2016-10-19	M	74	专业技术服务业	广东省	广州市	海珠区	广州市海珠区宝岗大道268号中新大厦1901-1907房	113.27	23.1054
469	联德（广州）机械有限公司	2003-02-18	2017-06-26	C	34	通用设备制造业	广东省	广州市	黄埔区	广州市高新技术产业开发区科学城南云一路17号	113.449	23.1583
470	有米科技股份有限公司（曾用名：广州优蜜信息科技有限公司）	2010-04-21	2023-09-22	I	64	互联网和相关服务	广东省	广州市	番禺区	广州市番禺区小谷围街青蓝街26号1701	113.393	23.0628
471	广州东之旭试验设备有限公司	2000-11-03	2019-07-04	C	40	仪器仪表制造业	广东省	广州市	南沙区	广州市南沙区东涌镇市南路东涌段117号	113.431	22.8998
472	广州捷达莱堡通用设备有限公司	1995-03-29	2023-12-05	C	34	通用设备制造业	广东省	广州市	番禺区	广州市番禺区石基镇前锋村前锋南路111、113号	113.454	22.9323
473	宝供物流企业集团有限公司	1999-09-27	2023-11-07	G	58	多式联运和运输代理业	广东省	广州市	天河区	广州市天河区龙口东路宝供大厦	113.347	23.1504
474	广州市启天科技股份有限公司	2007-08-20	2022-04-20	M	75	科技推广和应用服务业	广东省	广州市	海珠区	广州市海珠区广州大道南1601-1603号之十九自编101至110、二层201至210、三层301至310、四层401至410房间	113.285	23.113
475	广州顶新时代电子系统科技有限公司	2000-01-31	2023-12-13	I	65	软件和信息技术服务业	广东省	广州市	越秀区	广州市越秀区天河路1号701、702、703703房（仅限办公使用）（不可作厂房使用）	113.317	23.1408
476	广州帧网通信技术有限公司	2002-04-30	2015-07-31	M	73	研究和试验发展	广东省	广州市	越秀区	广州市越秀区先烈中路102号华盛大厦南塔905房	113.307	23.147
477	广东亚太天能科技股份有限公司（曾用名：广州市亚太天能信息技术有限公司）	2011-03-24	2023-11-28	C	39	计算机、通信和其他电子设备制造业	广东省	广州市	番禺区	广州市番禺区钟村街汉溪村汉溪商业中心泽溪街3号801-806	113.34	23.001
478	广州市珠江灯光科技有限公司	2011-10-12	2016-04-25	C	38	电气机械和器材制造业	广东省	广州市	番禺区	广州市番禺区南村镇兴业大道乌石岗地段（JM01厂房）	113.409	23.0104
479	广州创显科教股份有限公司（曾用名：广州创显光电科技有限公司）	2010-12-14	2023-09-20	I	65	软件和信息技术服务业	广东省	广州市	番禺区	广州市番禺区东环街番禺大道北555号天安总部中心16号楼302房	113.377	22.9859
480	广州永动信息科技有限公司（曾用名：广州永动电子有限公司）	2010-05-25	2022-06-28	L	72	商务服务业	广东省	广州市	天河区	广州市天河区珠江新城华明路13号2603房自编号1室（仅限办公）	113.323	23.1287
481	广州泰胜数控机械有限公司	2008-01-11	2021-08-27	C	35	专用设备制造业	广东省	广州市	番禺区	广州市番禺区石基镇金龙路桥山村段21号之1	113.432	22.986
482	广州黄岩机电科技有限公司	2010-01-25	2020-01-03	M	73	研究和试验发展	广东省	广州市	天河区	广州市天河区岑村圣堂大街31号307房（仅限办公用途）（不可作厂房使用）	113.387	23.1666
483	广州市番禺艺彩印刷联合有限公司	1994-04-29	2021-11-05	K	70	房地产业	广东省	广州市	番禺区	广州市番禺区石碁镇官塱路63号1栋101	113.451	22.9687
484	广州亚邦鑫程交通技术有限公司（曾用名：广东亚邦鑫程交通技术有限公司）	2011-09-19	2023-03-28	M	74	专业技术服务业	广东省	广州市	天河区	广州市天河区灵山东路4号第六层615房A28	113.431	23.1334
485	广州珠江光电新材料有限公司	1996-03-29	2023-12-29	C	26	化学原料和化学制品制造业	广东省	广州市	黄埔区	广州市黄埔区云埔工业区康达路1号	113.547	23.1299
486	广州游爱网络技术有限公司	2011-12-01	2023-12-12	I	65	软件和信息技术服务业	广东省	广州市	天河区	广州市天河区思成路23号219房（自编）	113.423	23.18
487	广州恩华特环境技术有限公司	2005-09-08	2024-03-08	M	73	研究和试验发展	广东省	广州市	越秀区	广州市越秀区东风中路515号1001房（自编号：1002-1003单元）	113.278	23.1381
488	广州珠江艾茉森数码乐器股份有限公司（曾用名：广州艾茉森电子有限公司）	2008-07-30	2023-09-26	M	73	研究和试验发展	广东省	广州市	增城区	广州市增城经济技术开发区香山大道38号自编1号楼二、三、四层	113.63	23.1797
489	广州地铁工程咨询有限公司（曾用名：广州轨道交通建设监理有限公司）	2006-12-13	2024-02-18	M	74	专业技术服务业	广东省	广州市	越秀区	广州市越秀区环市西路204号大院自编四号楼2、3层（仅限办公用途）	113.261	23.1529
490	广州市联柔机械设备有限公司	2005-09-01	2018-11-16	C	35	专用设备制造业	广东省	广州市	黄埔区	广州市萝岗区云展路13号	113.543	23.1571
491	广州大洋教育科技股份有限公司（曾用名：广州市大洋信息技术有限公司）	1998-04-24	2023-11-17	P	83	教育	广东省	广州市	天河区	广州市天河区天河北路908号2507房	113.351	23.1462
492	创启科技（广州）有限公司（曾用名：广州创启通信设备有限公司）	2004-09-03	2023-06-15	M	75	科技推广和应用服务业	广东省	广州市	黄埔区	广州市黄埔区神舟路9号1栋101房、1栋218房、1栋219房	113.438	23.1753
493	广州花都通用集团有限公司	1994-08-13	2020-06-30	C	35	专用设备制造业	广东省	广州市	花都区	广州市花都区炭步镇茶塘村	113.111	23.3217
494	广州神农网络科技有限公司（曾用名：广州神农信息技术服务有限公司）	2007-12-10	2021-02-01	M	73	研究和试验发展	广东省	广州市	天河区	广州市天河区天河东路240号701房	113.34	23.1432
495	广州禄仕食品有限公司（曾用名：广州陆仕水产企业有限公司）	1993-05-27	2023-03-10	C	13	农副食品加工业	广东省	广州市	花都区	广州市花都区炭步镇社岗村陆仕路1号	113.155	23.3232
496	广州市夜空彩虹光电科技有限公司	2004-09-09	2022-09-28	M	74	专业技术服务业	广东省	广州市	荔湾区	广州市荔湾区大坦沙桥中中路213-217号J1栋第二层厂房	113.225	23.1283
497	高尔夫科技（广州）有限公司（曾用名：广州奇洋能源科技有限公司）	2011-09-22	2021-10-08	M	73	研究和试验发展	广东省	广州市	番禺区	广州市番禺区石楼镇莲花山工业园利丰大道6号之一	113.5	22.9888
498	广东天健软件股份有限公司（曾用名：广州天健软件有限公司）	2010-12-21	2023-03-21	I	65	软件和信息技术服务业	广东省	广州市	黄埔区	广州高新技术产业开发区科学城掬泉路3号广州国际企业孵化器A区A507号房	113.454	23.1685
499	广州市聚赛龙工程塑料股份有限公司（曾用名：广州市聚赛龙工程塑料有限公司）	1998-01-21	2022-06-08	C	29	橡胶和塑料制品业	广东省	广州市	从化区	广州市从化鳌头镇龙潭聚宝工业区（村）	113.421	23.6584
500	广州市科传计算机科技股份有限公司	2009-09-15	2022-06-06	I	65	软件和信息技术服务业	广东省	广州市	越秀区	广州市越秀区东风中路515号东照大厦第29层第2901房第01-09号单元	113.283	23.1379
501	广州市科普超声电子技术有限公司	2004-09-21	2019-12-04	C	35	专用设备制造业	广东省	广州市	天河区	广州市天河区龙洞迎龙路260号D-3幢一楼自编龙洞工业厂房D-2幢一楼	113.37	23.216
502	广州市莱帝亚照明股份有限公司（曾用名：广州市莱帝亚照明科技有限公司）	2011-12-26	2022-03-30	C	38	电气机械和器材制造业	广东省	广州市	花都区	广州市花都区花东镇先科一路1号302房	113.367	23.4511
503	广东雷腾智能光电有限公司（曾用名：广州市雷腾照明科技有限公司）	2011-09-23	2022-01-12	C	38	电气机械和器材制造业	广东省	广州市	花都区	广州市花都区汽车城风神大道以南	113.149	23.3828
504	广州市凌特电子有限公司	2011-07-27	2022-03-08	M	73	研究和试验发展	广东省	广州市	越秀区	广州市越秀区环市中路205号自编B1315-B1316房（不可作厂房用途）	113.272	23.1524
505	广州市龙泰信息技术有限公司	2000-12-28	2017-02-21	M	73	研究和试验发展	广东省	广州市	天河区	广州市天河区天河科技园思成路1号北明软件大楼8楼自编802室（本住所限办公用途）	113.423	23.1789
506	广州市路由通讯技术有限公司	2000-04-12	2020-07-03	M	73	研究和试验发展	广东省	广州市	越秀区	广州市越秀区寺右新马路八号之一	113.312	23.1258
507	广东吕顺智能科技有限公司（曾用名：广州市吕顺机电设备有限公司）	2004-09-06	2022-07-22	C	34	通用设备制造业	广东省	广州市	黄埔区	广州市黄埔区笔村大路39号11栋101室11栋102室11栋103室	113.545	23.1096
508	广州米伽新材料科技有限公司（曾用名：广州市米伽建筑材料科技有限公司）	2009-05-21	2022-11-25	M	73	研究和试验发展	广东省	广州市	南沙区	广州市南沙区市南公路东涌段321号1号厂房101	113.472	22.8852
509	广州市敏嘉制造技术有限公司	2001-04-11	2018-03-06	C	34	通用设备制造业	广东省	广州市	南沙区	广州市南沙区东涌镇大稳村稳发路35号	113.44	22.8985
510	广州市明道灯光科技有限公司	2021-11-19	2021-11-19	M	73	研究和试验发展	广东省	广州市	花都区	广州市花都区新雅街东莞村永利路10号	113.252	23.3669
511	广州市南头科技有限公司	2002-05-24	2021-06-01	C	35	专用设备制造业	广东省	广州市	花都区	广州市花都区炭步镇茶塘村	113.111	23.3217
512	广州市凝智科技有限公司	2000-01-27	2022-11-03	C	40	仪器仪表制造业	广东省	广州市	黄埔区	广州市黄埔区光谱中路11号2栋2单元01层01、03单元	113.451	23.1655
513	广州市诺信数字测控设备有限公司	2002-08-05	2016-03-11	C	35	专用设备制造业	广东省	广州市	黄埔区	广州市萝岗区云骏路17号	113.545	23.1568
514	广州市欧玛灯光设备有限公司	2008-04-14	2019-07-09	C	38	电气机械和器材制造业	广东省	广州市	花都区	广州市花都区新雅街岑境西路26号	113.225	23.3561
515	广州市品高软件股份有限公司（曾用名：广州市品高软件开发有限公司）	2003-01-01	2022-03-14	C	39	计算机、通信和其他电子设备制造业	广东省	广州市	天河区	广州市天河区软件路17号第G1栋（不可作厂房用途）	113.421	23.1784
516	广州市普同实验分析仪器有限公司	2009-06-08	2023-10-08	C	40	仪器仪表制造业	广东省	广州市	番禺区	广州市番禺区大龙街开发路3号之四十101	113.411	22.9676
517	广州市儒兴科技股份有限公司（曾用名：广州市儒兴科技开发有限公司）	2000-07-03	2022-12-27	C	26	化学原料和化学制品制造业	广东省	广州市	黄埔区	广州市黄埔区瑞发路16号自编1栋	113.505	23.163
518	广州市锐丰音响科技股份有限公司	2001-04-23	2021-07-23	M	73	研究和试验发展	广东省	广州市	番禺区	广州市番禺区石楼镇市莲路石楼路段10号	113.491	22.9767
519	广州锐嘉工业股份有限公司（曾用名：广州市锐嘉包装设备有限公司）	2006-09-06	2022-08-16	C	35	专用设备制造业	广东省	广州市	黄埔区	广州市黄埔区埔南路63号之中3号厂房一层、二层	113.557	23.1354
520	广州市睿驰计算机科技有限公司	2006-09-25	2021-02-10	M	73	研究和试验发展	广东省	广州市	番禺区	广州市番禺区小谷围街外环西路100号广东工业大学理学馆418、420、422	113.406	23.0413
521	纽斯葆广赛（广东）生物科技股份有限公司（曾用名：广州市赛健生物科技有限公司）	2005-11-09	2023-01-18	M	73	研究和试验发展	广东省	广州市	从化区	广州市从化区明珠工业园兴业路1号	113.549	23.5975
522	广州市三地信息技术有限公司	1998-05-04	2023-11-01	M	73	研究和试验发展	广东省	广州市	天河区	广州市天河区华夏路30号3407房（仅限办公）	113.328	23.1318
523	广州市三甲医疗信息产业有限公司	1999-11-16	2021-05-28	M	73	研究和试验发展	广东省	广州市	黄埔区	广州高新技术产业开发区科学城开源大道11号C2栋3层	113.442	23.166
524	广州阿普顿自动化系统有限公司（曾用名：广州市上腾电子科技有限公司）	2005-10-28	2023-10-27	C	40	仪器仪表制造业	广东省	广州市	黄埔区	广州市黄埔区云埔一路19号1栋101房1栋201房	113.547	23.1518
525	广州市施达升设备制造股份有限公司（曾用名：广州市施达生五金配件制造有限公司）	2008-09-22	2016-12-16	C	35	专用设备制造业	广东省	广州市	番禺区	广州市番禺区桥南街汇景大道863号自编B座102	113.395	22.9247
526	广州市食品工业研究所有限公司	1988-07-09	2021-11-17	C	14	食品制造业	广东省	广州市	黄埔区	广州高新技术产业开发区科学城尖塔山路11号	113.253	23.2851
527	广州市食为天软件科技发展有限公司	2007-01-08	2017-06-29	M	73	研究和试验发展	广东省	广州市	天河区	广州市天河区天河南二路19-21号782A房	113.338	23.1376
528	广州市市政工程设计研究总院有限公司（曾用名：广州市市政工程设计研究院）	1980-10-22	2023-07-11	E	48	土木工程建筑业	广东省	广州市	越秀区	广州市越秀区环市东路348号东座	113.29	23.1432
529	广州市斯洛柯高分子聚合物有限公司	2009-10-09	2022-09-01	C	26	化学原料和化学制品制造业	广东省	广州市	黄埔区	广州高新技术产业开发区科学城科学大道182号创新大厦C1栋405单元（仅限办公）	113.463	23.1729
530	广州市索广电子技术有限公司	2008-04-29	2022-12-02	M	74	专业技术服务业	广东省	广州市	白云区	广州市白云区鹤龙街道鹤龙一横路6号i栋楼205房	113.277	23.221
531	广州市天吻娇颜化妆品有限公司	2003-01-27	2022-12-29	C	26	化学原料和化学制品制造业	广东省	广州市	从化区	广州市从化区经济开发区高技术产业园福从路9号	113.506	23.4549
532	广州市铁山兰实业有限公司	2003-08-20	2019-11-21	M	73	研究和试验发展	广东省	广州市	天河区	广州市天河区石牌西路115号天晟明苑北栋2503房	113.345	23.1344
533	广州市图南软件科技有限公司	2010-11-23	2020-02-17	M	73	研究和试验发展	广东省	广州市	天河区	广州市天河区高唐路235号406单元（仅限办公）	113.409	23.1715
534	广州市万洲电气设备有限公司	2004-12-03	2018-08-08	C	38	电气机械和器材制造业	广东省	广州市	从化区	广州市从化鳌头镇人民路308号大院1-4号	113.459	23.6226
535	广东伟昊智能科技有限公司（曾用名：广州市威安电子科技有限公司）	2003-07-31	2023-08-25	I	65	软件和信息技术服务业	广东省	广州市	天河区	广州市天河区天河北路侨林街43号2006房（仅限办公）	113.336	23.1492
536	广州市微生物研究所	2013-12-13	-	M	73	研究和试验发展	广东省	广州市	黄埔区	广州市萝岗区尖塔山路1号	113.445	23.1745
537	广州市维安科技股份有限公司（曾用名：广州市维安电子技术有限公司）	2000-04-11	2022-08-08	M	73	研究和试验发展	广东省	广州市	天河区	广州市天河区东莞庄一横路133号自编7号楼501房（仅限办公用途）	113.346	23.1576
538	广州市西合汽车电子装备有限公司	2009-07-07	2021-08-25	C	35	专用设备制造业	广东省	广州市	番禺区	广州市番禺区南村镇兴业大道东南侧（广州市骏拓工贸有限公司2号厂房）	113.347	22.9928
539	广州市香雪制药股份有限公司	1986-04-30	2023-07-14	C	27	医药制造业	广东省	广州市	黄埔区	广州市黄埔区广州开发区科学城金峰园路2号（自编第一、二、三、四、五、六、七、八栋）	113.457	23.185
540	广州市翔顺畜牧设备有限公司	2009-06-04	2023-10-10	C	34	通用设备制造业	广东省	广州市	从化区	广州市从化区鳌头镇黄桥街66号	113.434	23.6232
541	广州市心德实业有限公司	2007-07-02	2023-10-20	C	35	专用设备制造业	广东省	广州市	黄埔区	广州国际生物岛螺旋四路1号研发A区第五层501、502、503单元	113.374	23.0665
542	广州市新文溯科技有限公司	2001-06-20	2023-08-25	I	65	软件和信息技术服务业	广东省	广州市	番禺区	广州市番禺区小谷围街青蓝街28号1栋401、401-1、401-2、401-3室	113.394	23.0636
543	广州市亚丹柜业有限公司	2005-04-11	2023-01-17	C	41	其他制造业	广东省	广州市	花都区	广州市花都区花东镇港头社区华植东路3号208房	113.413	23.4379
544	广州宝镜智能科技有限公司（曾用名：广州市阳阳谷信息科技有限公司）	2011-08-25	2018-07-26	M	73	研究和试验发展	广东省	广州市	天河区	广州市天河区天河北路689号1014房（仅限办公用途，不可作厂房）	113.348	23.1474
545	广州市衣联网络科技有限公司	2007-03-30	2023-03-03	M	73	研究和试验发展	广东省	广州市	越秀区	广州市越秀区广州大道中599号第十二层1205-2单元	113.333	23.2139
546	广州市怡文环境科技股份有限公司	1995-10-10	2020-12-17	M	75	科技推广和应用服务业	广东省	广州市	黄埔区	广州市经济技术开发区南云三路12号（可作厂房使用）	113.454	23.1558
547	广州市易杰数码科技有限公司	2002-06-20	2023-04-25	I	63	电信、广播电视和卫星传输服务	广东省	广州市	天河区	广州市天河区中山大道路89号A栋10层南12-24房（不可作厂房使用）（该场所仅限办公用途）	113.369	23.1304
548	广州市友迪资讯科技有限公司	2001-06-05	2021-03-19	M	74	专业技术服务业	广东省	广州市	天河区	广州市天河区车陂西路212号之一9楼9088房	113.391	23.1429
549	广州宇洪科技股份有限公司（曾用名：广州市宇洪电线电缆实业有限公司）	2007-11-13	2022-09-30	M	73	研究和试验发展	广东省	广州市	天河区	广州市天河区软件路11号402室	113.419	23.1773
550	广州市禹成消防科技有限公司	2012-01-20	2023-02-28	M	73	研究和试验发展	广东省	广州市	番禺区	广州市番禺区石碁镇金山村华创动漫产业园C7栋301、401	113.43	22.999
551	广州市圆方计算机软件工程有限公司	1999-01-12	2017-06-27	I	65	软件和信息技术服务业	广东省	广州市	天河区	广州市天河区花城大道路85号3701房全层（仅作办公功能使用）	113.328	23.1261
552	广州远正智能科技股份有限公司（曾用名：广州市远正智能科技有限公司）	2004-08-01	2022-06-01	M	73	研究和试验发展	广东省	广州市	南沙区	广州市南沙区环市大道南路25号（自编3栋研发楼A2）栋4层（限办公用途）	113.531	22.8079
553	广州市知微科技有限公司	2000-07-13	2021-03-12	I	65	软件和信息技术服务业	广东省	广州市	天河区	广州市天河区思成路23号宏太智慧谷七号楼2楼自编215房（仅限办公）	113.423	23.18
554	广州市知易信息技术有限公司	2009-05-13	2022-03-21	I	65	软件和信息技术服务业	广东省	广州市	黄埔区	广州市黄埔区科学大道286号501-9房	113.465	23.174
555	广州市智益信息技术有限公司	2001-06-07	2022-03-24	M	73	研究和试验发展	广东省	广州市	越秀区	广州市越秀区寺右新马路174号14楼自编D	113.319	23.1246
556	广州市中海达测绘仪器有限公司	1999-12-28	2023-10-31	I	65	软件和信息技术服务业	广东省	广州市	番禺区	广州市番禺区东环街番禺大道北555号天安总部中心13号楼202房	113.38	22.987
557	广州市中南民航空管通信网络科技有限公司	2004-09-22	2021-07-14	M	73	研究和试验发展	广东省	广州市	白云区	广州市白云区北太路1633号广州民营科技园科盛路8号配套服务大楼605-8房	113.342	23.302
558	广州市中智软件开发有限公司	2001-09-17	2021-11-10	I	65	软件和信息技术服务业	广东省	广州市	天河区	广州市天河区天河北路906号1404房（仅限办公）	113.351	23.1464
559	广州市众达电器实业有限公司	2012-10-10	2018-12-05	C	39	计算机、通信和其他电子设备制造业	广东省	广州市	花都区	广州市花都区花山镇红群村十八经济社自编8号之九	113.219	23.4101
560	广州市珠江电线厂有限公司	1991-01-11	2020-09-02	C	38	电气机械和器材制造业	广东省	广州市	花都区	广州市花都区秀全街毕村北路4号3、4号厂房	113.184	23.4053
561	广州市尊网商通资讯科技有限公司	2000-08-22	2022-06-23	M	73	研究和试验发展	广东省	广州市	黄埔区	广州市黄埔区科学大道286号1001-9房（仅限办公）	113.465	23.174
562	广州视声智能股份有限公司（曾用名：广州视声电子实业有限公司）	2011-01-06	2023-02-15	I	65	软件和信息技术服务业	广东省	广州市	黄埔区	广州市黄埔区蓝玉四街9号科技园5号厂房3楼	113.533	23.0642
563	广州视源电子科技股份有限公司（曾用名：广州视源电子科技有限公司）	2005-12-28	2023-08-18	M	73	研究和试验发展	广东省	广州市	黄埔区	广州黄埔区云埔四路6号	113.533	23.1618
564	广州数控设备有限公司	1991-04-08	2020-04-24	M	73	研究和试验发展	广东省	广州市	黄埔区	广州市萝岗区观达路22号	113.549	23.1597
565	广州双桥股份有限公司	1999-08-28	2023-08-11	G	55	水上运输业	广东省	广州市	海珠区	广州市海珠区工业大道南箕路346号	113.279	23.0723
566	广州思泰信息技术有限公司	2009-05-21	2020-04-29	M	73	研究和试验发展	广东省	广州市	黄埔区	广州高新技术产业开发区观虹路10号1111房	113.464	23.1734
567	广州松兴电气股份有限公司（曾用名：广州松兴电器有限公司）	1997-08-29	2023-01-12	C	40	仪器仪表制造业	广东省	广州市	黄埔区	广州市萝岗区云埔工业区云骏路2号	113.546	23.1491
568	广州穗剑实验室科技有限公司	2009-04-03	2017-03-15	M	73	研究和试验发展	广东省	广州市	黄埔区	广州高新技术产业开发区科学城崖鹰石路27号自编3栋201	113.426	23.6574
569	广州太平洋电脑信息咨询有限公司	1997-11-07	2022-05-18	I	65	软件和信息技术服务业	广东省	广州市	天河区	广州市天河区高普路115号	113.421	23.1825
570	广州天赐高新材料股份有限公司	2000-06-06	2023-05-31	C	26	化学原料和化学制品制造业	广东省	广州市	黄埔区	广州市黄埔区云埔工业区东诚片康达路8号	113.547	23.1305
571	广州天河胶管制品有限公司	1999-12-08	2023-02-17	C	29	橡胶和塑料制品业	广东省	广州市	天河区	广州市天河区天河科技园软件园高塘新建区高普路西侧98号	113.407	23.1998
572	广州天趣网络科技有限公司	2011-05-23	2021-06-03	M	73	研究和试验发展	广东省	广州市	越秀区	广州市越秀区广州大道中307号（C栋）606房	113.337	23.2088
573	广州天至环保科技有限公司	2004-07-19	2015-12-17	C	26	化学原料和化学制品制造业	广东省	广州市	海珠区	广州市海珠区广州大道南敦和路189号海珠科技产业基地敦和园区一号楼204、206号	113.326	23.0941
574	广州通易科技有限公司	2001-03-27	2023-02-02	M	73	研究和试验发展	广东省	广州市	天河区	广州市天河区翰景路1号1401房自编A、B、C、D1、H1部位	113.353	23.1498
575	广州图创计算机软件开发有限公司	2003-01-29	2023-06-13	I	65	软件和信息技术服务业	广东省	广州市	天河区	广州市天河区高新技术产业开发区首期工业园建工路9号2楼南区205、207、209号	113.379	23.1294
576	广州万孚生物技术股份有限公司	1992-11-13	2023-03-09	M	73	研究和试验发展	广东省	广州市	黄埔区	广州市黄埔区科学城荔枝山路8号	113.445	23.185
577	广州王老吉药业股份有限公司	1992-12-05	2023-02-24	C	27	医药制造业	广东省	广州市	白云区	广州市白云区广花二路831号	113.251	23.2808
578	广州旺大饲料科技有限公司	2011-12-30	2022-10-27	M	73	研究和试验发展	广东省	广州市	白云区	广州市白云区钟落潭镇飞来岭罗岭路51号	113.373	23.3346
579	广州威稳电机有限公司	2008-08-11	2022-02-15	C	38	电气机械和器材制造业	广东省	广州市	花都区	广州市花都区花山镇平山民营工业园16号自编5栋第6、7层（空港花都）	113.28	23.4426
580	广州微点焊设备有限公司	1996-07-11	2022-05-17	C	35	专用设备制造业	广东省	广州市	荔湾区	广州市荔湾区东沙荷景南路43号	113.252	23.0614
581	广州微宏电源科技有限公司	2004-01-06	2020-07-28	M	73	研究和试验发展	广东省	广州市	花都区	广州市花都区花山镇平山民营工业园16号6楼（可作厂房使用）	113.276	23.4385
582	广州维宝计算机科技有限公司	2006-05-10	2022-10-28	M	73	研究和试验发展	广东省	广州市	天河区	广州市天河区广汕二路602号之一311房	113.42	23.1964
583	广州维德科技有限公司	1999-06-23	2021-11-30	M	73	研究和试验发展	广东省	广州市	天河区	广州市天河区东莞庄路161号自编13栋	113.344	23.163
584	广州维力医疗器械股份有限公司	2004-04-30	2023-08-15	C	35	专用设备制造业	广东省	广州市	番禺区	广州市番禺区化龙镇金湖工业城C区4号	113.464	23.0019
585	广州先艺电子科技有限公司	2008-12-10	2023-10-17	C	39	计算机、通信和其他电子设备制造业	广东省	广州市	番禺区	广州市番禺区石碁镇莲运一横路16号5栋301、6栋301	113.454	22.9495
586	广州协商科技有限公司	2001-07-27	2016-07-20	M	73	研究和试验发展	广东省	广州市	天河区	广州市天河区龙口东路34号1401房自编1409单元	113.348	23.1432
587	广州携智信息科技有限公司	2007-09-25	2014-12-09	M	73	研究和试验发展	广东省	广州市	天河区	广州市天河区黄埔大道西路33号23楼BCD1房	113.369	23.1304
588	广东新晨汽车科技股份有限公司（曾用名：广州新晨汽车零部件有限公司）	2005-03-16	2023-10-12	C	36	汽车制造业	广东省	广州市	南沙区	广州市南沙区黄阁镇四兴街11号201室01房	113.522	22.8275
589	广州新成机械技术有限公司	2004-09-27	2015-11-19	C	43	金属制品、机械和设备修理业	广东省	广州市	花都区	广州市花都区新华街九潭村东安经济社利华（土名）即皇帝路西侧	113.229	23.4268
590	广州新华时代数据系统有限公司	1999-05-07	2019-04-22	M	73	研究和试验发展	广东省	广州市	天河区	广州市天河区天河东路67号丰兴广场A座第24楼01室（仅限办公）（不可作厂房使用）	113.34	23.1381
591	广州新济药业科技有限公司	2007-11-14	2023-10-08	M	73	研究和试验发展	广东省	广州市	番禺区	广州市番禺区化龙镇兴业大道东1078号1栋2梯501房	113.446	23.0434
592	广州新科佳都科技有限公司	2004-01-07	2023-08-08	M	75	科技推广和应用服务业	广东省	广州市	天河区	广州市天河区新岑四路2号佳都智慧大厦709房	113.412	23.1711
593	广州新莱福新材料股份有限公司（曾用名：广州新莱福磁电有限公司）	1998-05-08	2023-09-22	C	26	化学原料和化学制品制造业	广东省	广州市	黄埔区	广州经济技术开发区永和经济区沧海四路4号	113.569	23.1839
594	广州新普利节能环保科技有限公司	2012-05-07	2019-07-12	C	35	专用设备制造业	广东省	广州市	天河区	广州市天河区白沙水路119号302房	113.356	23.1808
595	广东利通科技投资有限公司（曾用名：广州新软计算机技术有限公司）	2000-11-28	2023-01-17	M	73	研究和试验发展	广东省	广州市	黄埔区	广州市萝岗区科学城科汇三街5号601房（仅限办公用途）	113.442	23.1745
596	广州新影数字传媒有限公司	2008-07-28	2015-09-06	R	87	广播、电视、电影和录音制作业	广东省	广州市	越秀区	广州市越秀区寺右新马路111-115号夹层05室（仅作办公场所使用）	113.32	23.1265
597	广州鑫源恒业电力线路器材股份有限公司	2001-09-18	2023-02-06	C	38	电气机械和器材制造业	广东省	广州市	增城区	广州市增城新塘镇永和陂头村石虎山（土名）	113.619	23.1841
598	广州星业科技股份有限公司	1997-03-18	2023-07-07	M	73	研究和试验发展	广东省	广州市	黄埔区	广州市经济技术开发区永和经济区沧海二路7号自编一栋至八栋	113.57	23.1865
599	广州兴华玻璃工业有限公司	1994-10-24	2022-08-10	C	30	非金属矿物制品业	广东省	广州市	白云区	广州市白云区槎头广海路后岗西街6号自编1栋首层	113.23	23.1928
600	广州秀珀化工涂料有限公司（曾用名：广州秀珀化工股份有限公司）	1984-03-06	2021-08-12	C	26	化学原料和化学制品制造业	广东省	广州市	番禺区	广州市番禺区钟村镇谢石公路72号秀珀工业园	113.293	23.0011
601	广州洋钒电子科技有限公司	2008-10-06	2023-11-07	M	73	研究和试验发展	广东省	广州市	天河区	广州市天河区柯木塱南路9号1层112单元38房	113.411	23.1945
602	广州易达建信科技开发有限公司	2001-11-05	2023-06-13	I	65	软件和信息技术服务业	广东省	广州市	天河区	广州市天河区天河北路892号13楼（仅限办公）	113.351	23.1471
603	广州卡宝宝互联网信息服务股份有限公司（曾用名：广州易卡电子科技有限公司）	2009-05-30	2022-12-23	L	72	商务服务业	广东省	广州市	黄埔区	广州市黄埔区科学大道162号B1栋307房	113.457	23.17
604	广州意戈力自动化设备有限公司	2006-09-06	2022-08-05	C	35	专用设备制造业	广东省	广州市	番禺区	广州市番禺区南村镇里仁洞上沙街四巷6号202	113.358	22.9968
605	广州毅昌科技股份有限公司	1997-09-12	2023-07-17	C	38	电气机械和器材制造业	广东省	广州市	黄埔区	广州市高新技术产业开发区科学城科丰路29号	113.462	23.1523
606	广州因赛电子科技有限公司	2012-09-27	2020-05-07	M	73	研究和试验发展	广东省	广州市	南沙区	广州市南沙区南沙街金岭北路95号312房（仅限办公）	113.557	22.8
607	广州银联网络支付有限公司	2001-12-13	2022-08-22	M	73	研究和试验发展	广东省	广州市	黄埔区	广州市高新技术产业开发区工业园建中路６１号	113.378	23.1292
608	广州英赛特生物技术有限公司	2009-09-14	2022-12-12	M	73	研究和试验发展	广东省	广州市	黄埔区	广州高新技术产业开发区科学城掬泉路3号广州国际企业孵化器D区D415号	113.453	23.1689
609	广州优华过程技术有限公司	2001-10-25	2023-04-26	M	74	专业技术服务业	广东省	广州市	天河区	广州市天河区体育西路189号城建大厦17G	113.327	23.145
610	广州优利康沛科技有限公司	1999-06-04	2017-07-21	C	35	专用设备制造业	广东省	广州市	天河区	广州市天河区大灵山路61号第26栋C1305房	113.426	23.1399
611	广州友益科技园有限公司（曾用名：广州友益电子科技有限公司）	2002-01-09	2020-07-13	M	73	研究和试验发展	广东省	广州市	黄埔区	广州保税区保盈大道13号首层	113.537	23.0816
612	广州钰鑫环保塑胶有限公司	2004-02-17	2022-03-31	C	29	橡胶和塑料制品业	广东省	广州市	增城区	广州市增城区永宁街香堤二街2号	113.229	23.105
613	广州御新软件有限公司	2006-01-12	2017-03-30	M	73	研究和试验发展	广东省	广州市	天河区	广州市天河区高唐路234号902房（仅限办公用途）	113.41	23.1713
614	广州御银科技股份有限公司	2001-04-26	2023-07-26	C	39	计算机、通信和其他电子设备制造业	广东省	广州市	天河区	广州市天河区高唐路234号803房	113.41	23.1713
615	广州御银自动柜员机技术有限公司	2006-07-25	2017-08-17	C	35	专用设备制造业	广东省	广州市	黄埔区	广州市萝岗区瑞发路12号自编一栋首层	113.507	23.1633
616	广州元亨计算机科技有限公司	2003-07-04	2023-08-29	I	65	软件和信息技术服务业	广东省	广州市	天河区	广州市天河区中山大道建工路19号首层	113.379	23.1282
617	广州越美科技材料有限公司（曾用名：广州跃美塑料工业有限公司）	2007-05-25	2022-07-15	C	42	废弃资源综合利用业	广东省	广州市	增城区	广州市增城区宁西太新路159号厂房一层	113.661	23.2304
618	广东越维信息科技有限公司（曾用名：广州越维信息科技有限公司）	2004-07-15	2023-05-31	I	65	软件和信息技术服务业	广东省	广州市	天河区	广州市天河区东圃车陂路黄洲工业区大院内自编8号第7层713房	113.395	23.127
619	广州粤建三和软件股份有限公司（曾用名：广州粤建三和软件有限公司）	1999-05-21	2023-04-03	N	76	水利管理业	广东省	广州市	天河区	广州市天河区五山路246、248、250号301-1房	113.353	23.1495
620	广州长川科技有限公司	2003-12-16	2018-05-22	M	73	研究和试验发展	广东省	广州市	黄埔区	广州市高新技术产业开发区科学城香山路3号三层	113.444	23.1789
621	广州震雄装饰工程有限公司	2007-05-30	2023-07-28	E	50	建筑装饰、装修和其他建筑业	广东省	广州市	从化区	广东从化经济开发区高技术产业园工业大道10号	113.505	23.4507
622	广东正力通用电气有限公司（曾用名：广州正力通用电气有限公司）	2000-11-14	2023-07-26	C	39	计算机、通信和其他电子设备制造业	广东省	广州市	番禺区	广州市番禺区大龙街市莲路沙涌村段金鳌街26号	113.432	22.9601
623	广州致远电子股份有限公司	2001-05-14	2022-12-13	C	40	仪器仪表制造业	广东省	广州市	天河区	广州市天河区软件园思成路43号第3层306房	113.429	23.1865
624	广州智光电气股份有限公司	1999-04-09	2023-05-18	M	73	研究和试验发展	广东省	广州市	黄埔区	广州市黄埔区埔南路51号	113.553	23.1353
625	广州智光节能环保有限公司（曾用名：广州智光节能有限公司）	2010-05-18	2023-05-08	M	74	专业技术服务业	广东省	广州市	黄埔区	广州市黄埔区瑞和路89号自编北楼511房	113.507	23.1656
626	广州智能科技发展有限公司	1992-08-11	2021-01-14	I	65	软件和信息技术服务业	广东省	广州市	天河区	广州市天河区翰景路1号701房自编A、B、C、D、E、H、G（仅限办公）	113.353	23.1498
627	广州智特奇生物科技股份有限公司	1998-10-12	2023-01-05	M	73	研究和试验发展	广东省	广州市	黄埔区	广州市黄埔区中新广州知识城凤凰三横路78号	113.507	23.398
628	广州中爆数字信息科技股份有限公司（曾用名：广州中爆数字信息科技有限公司）	2010-12-21	2023-09-20	I	65	软件和信息技术服务业	广东省	广州市	黄埔区	广州市黄埔区开创大道2707号(自编B1栋)1711、1712房（仅限办公用途）	113.473	23.1758
629	广州中大电讯科技有限公司	2001-05-29	2021-12-06	I	65	软件和信息技术服务业	广东省	广州市	番禺区	广州市番禺区小谷围街中二横路22号A204-1	113.401	23.067
630	广州中海达定位技术有限公司	2009-08-31	2022-10-19	C	40	仪器仪表制造业	广东省	广州市	番禺区	广州市番禺区东环街番禺大道北537号番禺节能科技园内番山创业中心1号楼3区803、804之一	113.37	22.9845
631	广州中海电信有限公司	2001-12-18	2023-08-08	I	63	电信、广播电视和卫星传输服务	广东省	广州市	海珠区	广州市海珠区昌岗东路252号自编8号405	113.285	23.0977
632	广州中浩控制技术有限公司	2002-06-06	2022-11-08	M	73	研究和试验发展	广东省	广州市	越秀区	广州市越秀区先烈中路100号大院15号整栋（部位：自编1-2楼全层）（不可作厂房使用）	113.306	23.1455
633	广州中科雅图信息技术有限公司	2009-09-24	2023-05-04	I	65	软件和信息技术服务业	广东省	广州市	番禺区	广州市番禺区东环街番禺大道北555号天安总部中心2号楼1101、1102房	113.378	22.9848
634	广州中科宇图软件有限公司	2011-11-10	2022-05-27	M	73	研究和试验发展	广东省	广州市	黄埔区	广州市黄埔区科学城揽月路80号科技创新基地E区502房、504房（仅限办公）	113.459	23.1654
635	广州中茂园林建设工程有限公司	2000-03-15	2023-07-14	N	78	公共设施管理业	广东省	广州市	天河区	广州市天河区海安路13号之二2602房	113.347	23.1304
636	广州中望龙腾软件股份有限公司	1998-08-24	2023-10-27	I	65	软件和信息技术服务业	广东省	广州市	天河区	广州市天河区珠江西路15号32层自编01-08房	113.329	23.13
637	广州中长康达信息技术有限公司	1998-12-03	2017-06-07	I	65	软件和信息技术服务业	广东省	广州市	天河区	广州市天河区思成路19号601房（仅限办公用途）	113.424	23.1798
638	广州忠信世纪电子材料制造有限公司（曾用名：广州忠信世纪玻纤有限公司）	2001-04-30	2021-12-27	C	39	计算机、通信和其他电子设备制造业	广东省	广州市	南沙区	广州市南沙区环市大道北3号	113.57	22.7599
639	广州万居隆科技有限公司（曾用名：广州众信环境科技有限公司）	2010-12-23	2023-06-21	M	73	研究和试验发展	广东省	广州市	番禺区	广州市番禺区石碁镇石碁村莲运二横路22号	113.448	22.9544
640	广州珠江电信设备制造有限公司	1996-03-12	2019-02-26	M	73	研究和试验发展	广东省	广州市	白云区	广州市白云区太和镇大沥村广州民营科技园管理中心壹号	113.341	23.3015
641	广州珠江钢琴集团股份有限公司	1987-10-10	2023-05-19	C	24	文教、工美、体育和娱乐用品制造业	广东省	广州市	增城区	广州市增城区永宁街香山大道38号1号楼、厂房（自编号3号楼）	113.63	23.1797
642	广州珠江啤酒股份有限公司	2002-12-25	2023-06-05	C	15	酒、饮料和精制茶制造业	广东省	广州市	海珠区	广州市海珠区新港东路磨碟沙大街118号	113.34	23.112
643	中国广电广州网络股份有限公司（曾用名：广州珠江数码集团有限公司）	1993-05-26	2022-02-09	G	58	多式联运和运输代理业	广东省	广州市	越秀区	广州市越秀区环市中路233号彩电中心内	113.275	23.1507
644	广州拙进通信技术有限公司	2011-07-28	2016-11-25	M	73	研究和试验发展	广东省	广州市	天河区	广州市天河区黄埔大道中路285号2楼（本住所仅限办公功能）	113.381	23.1266
645	紫科装备股份有限公司（曾用名：广州紫科生物环保技术有限公司）	2002-08-15	2023-09-20	C	35	专用设备制造业	广东省	广州市	黄埔区	广州市黄埔区开创大道2707号706房	113.473	23.1758
646	国光电器股份有限公司	1995-12-08	2023-02-06	C	39	计算机、通信和其他电子设备制造业	广东省	广州市	花都区	广州市花都区新雅街镜湖大道8号	113.256	23.3798
647	海华电子企业（中国）有限公司	1984-12-05	2023-05-30	C	39	计算机、通信和其他电子设备制造业	广东省	广州市	黄埔区	广州市高新技术产业开发区科学城南翔二路23号	113.46	23.1599
648	海聚高分子材料科技（广州）有限公司	2004-07-19	2021-04-25	M	73	研究和试验发展	广东省	广州市	黄埔区	广州市黄埔区宏景路59号1栋202房1栋203房1栋205房1栋206房2栋102房	113.537	23.1307
649	宏昌电子材料股份有限公司	1995-09-28	2023-07-28	C	26	化学原料和化学制品制造业	广东省	广州市	黄埔区	广州市黄埔区开创大道728号3栋101房（部位：3栋212房）	113.54	23.1423
650	互太（番禺）纺织印染有限公司	1997-07-23	2022-08-12	C	17	纺织业	广东省	广州市	南沙区	广州南沙区万顷沙镇同兴村	113.559	22.7122
651	佳都新太科技股份有限公司	2001-09-30	2023-09-22	M	73	研究和试验发展	广东省	广州市	番禺区	广州市番禺区东环街迎宾路832号番禺节能科技园内番山创业中心1号楼2区306房	113.37	22.9845
652	建峰索具有限公司	2004-01-19	2023-08-24	C	17	纺织业	广东省	广州市	黄埔区	广州经济技术开发区永和区贤堂路18号	113.538	23.2137
653	金医慧通科技有限公司（曾用名：金蝶医疗软件科技有限公司）	1997-04-10	2022-07-14	F	52	零售业	广东省	广州市	天河区	广州市天河区兴国路21号20楼01-10房	113.336	23.1213
654	金发科技股份有限公司	1993-05-26	2023-05-30	C	29	橡胶和塑料制品业	广东省	广州市	黄埔区	广州市高新技术产业开发区科学城科丰路33号	113.466	23.1572
655	金鹏电子信息机器有限公司	1995-09-13	2021-05-24	I	65	软件和信息技术服务业	广东省	广州市	黄埔区	广州市高新技术产业开发区神舟路9号	113.438	23.1753
656	京华信息科技股份有限公司	1993-01-03	2023-03-14	M	73	研究和试验发展	广东省	广州市	天河区	广州市天河区高普路138号京华信息大楼中座	113.416	23.1778
657	京信通信技术（广州）有限公司	2002-05-23	2023-10-07	I	63	电信、广播电视和卫星传输服务	广东省	广州市	黄埔区	广州经济技术开发区金碧路6号	113.526	23.057
658	蓝盾信息安全技术股份有限公司	2012-02-08	2021-03-16	C	39	计算机、通信和其他电子设备制造业	广东省	广州市	黄埔区	广州市高新技术产业开发区科汇二街15号301（部位：301-2房）（仅限办公用途）	113.441	23.1738
659	蓝盾信息安全技术有限公司	2012-02-08	2021-03-16	C	39	计算机、通信和其他电子设备制造业	广东省	广州市	黄埔区	广州市高新技术产业开发区科汇二街15号301（部位：301-2房）（仅限办公用途）	113.441	23.1738
660	越亮传奇科技股份有限公司（曾用名：联想中望系统服务有限公司）	2002-12-12	2023-10-19	C	39	计算机、通信和其他电子设备制造业	广东省	广州市	天河区	广州市天河区天河北路898号信源大厦307-308房	113.352	23.1468
661	美晨集团股份有限公司	1993-08-24	2023-07-18	L	72	商务服务业	广东省	广州市	越秀区	广州市越秀区水荫路17号之二1楼	113.315	23.1421
662	纽宝力精化（广州）有限公司	2001-04-30	2020-10-26	C	26	化学原料和化学制品制造业	广东省	广州市	南沙区	广州市南沙区环市大道北7号	113.57	22.7601
663	中信环境技术（广州）有限公司（曾用名：诺卫环境安全工程技术（广州）有限公司）	2003-09-25	2023-07-28	N	77	生态保护和环境治理业	广东省	广州市	南沙区	广州市南沙区小虎南二路26号自编二栋101（仅限办公用途）	113.549	22.8408
664	日立电梯（中国）有限公司	1995-10-04	2023-06-06	C	34	通用设备制造业	广东省	广州市	天河区	广州市天河区天河北路233号中信广场办公大楼62层（仅限办公）（不可作厂房）	113.329	23.1445
665	三菱重工东方燃气轮机（广州）有限公司	2004-07-13	2023-04-19	C	34	通用设备制造业	广东省	广州市	南沙区	广州市南沙区广兴路52号1、2、3、4、6、7栋	113.548	22.7792
666	斯凯文软件技术（广东）有限公司	1994-03-01	2022-01-12	I	65	软件和信息技术服务业	广东省	广州市	天河区	广州市天河区马场路16号之一1110室，1111室（仅限办公）	113.35	23.1238
667	速达软件技术（广州）有限公司	1999-03-01	2022-03-07	I	65	软件和信息技术服务业	广东省	广州市	黄埔区	广州市黄埔区蓝玉四街9号5号厂房东601房	113.533	23.0642
668	天讯瑞达通信技术有限公司	1997-03-05	2022-07-05	I	65	软件和信息技术服务业	广东省	广州市	天河区	广州市天河区华利路19号三楼	113.323	23.1239
669	托肯恒山科技（广州）有限公司	1998-10-26	2023-04-04	C	39	计算机、通信和其他电子设备制造业	广东省	广州市	黄埔区	广州高新技术产业开发区广州科学城南翔一路66号	113.462	23.1626
670	万信达（广州）科技制品有限公司	2005-04-06	2023-06-05	C	29	橡胶和塑料制品业	广东省	广州市	花都区	广州市花都区汽车城零配件二区岭西路	113.144	23.3691
671	帷千移动在线（广州）信息科技有限公司	2011-01-10	2016-08-29	I	65	软件和信息技术服务业	广东省	广州市	天河区	广州市天河区花城大道87号14楼03A单元	113.329	23.1258
672	长讯通信服务有限公司	1993-01-14	2022-05-18	I	63	电信、广播电视和卫星传输服务	广东省	广州市	天河区	广州市天河区翰景路1号201房自编B2（仅限办公）	113.353	23.1498
673	志圣科技（广州）有限公司	1994-04-09	2022-07-05	C	39	计算机、通信和其他电子设备制造业	广东省	广州市	花都区	广州市花都区狮岭镇第二工业区利和路６号	113.152	23.468
674	中国能源建设集团广东省电力设计研究院有限公司（曾用名：中国能源建设集团广东省电力设计研究院）	2001-11-08	2021-08-05	M	74	专业技术服务业	广东省	广州市	黄埔区	广东省广州市黄埔区广州科学城天丰路1号	113.465	23.166
675	中交四航工程研究院有限公司	1988-07-04	2022-06-13	E	48	土木工程建筑业	广东省	广州市	白云区	广州市白云区北太路1633号广州民营科技园科盛路8号配套服务大楼5层A505-398房	113.342	23.302
676	中科院广州化学有限公司	2001-12-21	2023-09-07	C	26	化学原料和化学制品制造业	广东省	广州市	天河区	广州市天河区兴科路368号（仅限办公）（不可作厂房使用）	113.368	23.1796
677	中通服中睿科技有限公司（曾用名：中睿通信规划设计有限公司）	2012-06-27	2023-04-04	M	74	专业技术服务业	广东省	广州市	天河区	广东省广州市天河区陶育路78号201房（广东省广州市天河区思成路23号242房（自编））	113.423	23.18
678	广州达安基因股份有限公司（曾用名：中山大学达安基因股份有限公司）	1988-08-17	2022-07-22	M	73	研究和试验发展	广东省	广州市	黄埔区	广州市高新技术产业开发区香山路19号	113.448	23.186
679	中时讯通信建设有限公司	2012-06-27	2022-12-15	I	65	软件和信息技术服务业	广东省	广州市	越秀区	广州市越秀区越华路28号1号楼5层（仅限办公）	113.277	23.1358
680	中数通信息有限公司	1997-12-23	2022-05-17	I	65	软件和信息技术服务业	广东省	广州市	天河区	广东省广州市天河区元岗路310号自编5栋	113.347	23.1813
681	中水珠江规划勘测设计有限公司	1994-12-26	2023-02-10	M	74	专业技术服务业	广东省	广州市	天河区	广州市天河区天寿路105号9-19层	113.339	23.1538
682	棕榈设计集团有限公司（曾用名：棕榈设计有限公司）	2012-05-25	2023-08-08	M	74	专业技术服务业	广东省	广州市	黄埔区	广州市黄埔区（中新广州知识城）亿创街1号406房之706（仅限办公）	113.555	23.3308
683	广州珠江恺撒堡钢琴有限公司	2010-11-19	2023-07-11	C	24	文教、工美、体育和娱乐用品制造业	广东省	广州市	增城区	广州市增城永宁街香山大道38号1号楼、厂房（自编号3号楼）	113.63	23.1797
684	广州五所环境仪器有限公司	1995-11-06	2022-05-16	C	40	仪器仪表制造业	广东省	广州市	增城区	广州市增城朱村街朱村大道西76号	113.687	23.2862
685	广东智慧电子信息产业股份有限公司	1999-04-15	2020-08-07	C	39	计算机、通信和其他电子设备制造业	广东省	广州市	黄埔区	广州市黄埔区中新广州知识城凤凰一路78号	113.559	23.3285
686	广州合诚实业有限公司	2003-08-11	2022-07-01	C	14	食品制造业	广东省	广州市	黄埔区	广州市萝岗区云埔工业区云诚路8号	113.552	23.1482
687	广州合道信息科技有限公司	2008-02-25	2023-03-02	I	65	软件和信息技术服务业	广东省	广州市	天河区	广州市天河区华景北路72号二层	113.369	23.147
688	广州合乐数字科技有限公司	2011-04-02	2020-10-22	M	73	研究和试验发展	广东省	广州市	黄埔区	广州高新技术产业开发区科学大道科汇一街12号101房	113.465	23.1784
689	广州亨龙智能装备股份有限公司（曾用名：广州亨龙机电股份有限公司）	1997-04-17	2023-01-05	C	34	通用设备制造业	广东省	广州市	从化区	广州市从化区太平镇新一路63号	113.306	23.0213
690	广州弘盈环保技术有限公司	2011-03-03	2016-05-31	M	73	研究和试验发展	广东省	广州市	黄埔区	广州高新技术产业开发区瑞和路79号204-3房	113.508	23.1634
691	广州红帆科技有限公司（曾用名：广州红帆电脑科技有限公司）	1998-01-24	2023-01-18	I	65	软件和信息技术服务业	广东省	广州市	天河区	广州市天河区水荫路115号311房、312房、313房（仅限办公）	113.318	23.1496
692	广州红鹰能源科技有限公司	2001-07-24	2022-04-25	M	73	研究和试验发展	广东省	广州市	花都区	广州市花都区天贵路92号一层至十八层（部位：13楼03室）	113.23	23.4036
693	广州宏昌胶粘带厂	1992-07-02	2020-04-30	C	29	橡胶和塑料制品业	广东省	广州市	花都区	广州市花都区花山镇龙口村长布社工业路13号之一	113.267	23.4047
694	广州宏仁电子工业有限公司	1996-03-20	2023-10-08	C	39	计算机、通信和其他电子设备制造业	广东省	广州市	黄埔区	广州市黄埔区开创大道728号3栋202房号	113.54	23.1423
695	广州宏晟光电科技股份有限公司（曾用名：广州宏晟光电科技有限公司）	2007-07-09	2020-08-25	C	40	仪器仪表制造业	广东省	广州市	从化区	广州市从化江埔街河东北路93号8栋	113.611	23.5517
696	广州鸿葳科技有限公司（曾用名：广州鸿葳科技股份有限公司）	2010-12-27	2023-03-09	M	73	研究和试验发展	广东省	广州市	黄埔区	广州市高新技术产业开发区科学城科研路6号	113.447	23.1752
697	广州华工百川科技有限公司（曾用名：广州华工百川科技股份有限公司）	2000-12-18	2021-10-15	I	65	软件和信息技术服务业	广东省	广州市	黄埔区	广州市萝岗区玉岩路华立街3号	113.54	23.1753
698	广州华工邦元信息技术有限公司	2002-05-17	2021-09-18	M	73	研究和试验发展	广东省	广州市	天河区	广州市天河区五山路381号华南理工大学后勤综合楼3层B区	113.349	23.1537
699	广州华工机动车检测技术有限公司	1993-09-12	2021-04-16	M	74	专业技术服务业	广东省	广州市	黄埔区	广州市黄埔区保盈东路8号	113.542	23.0808
700	招商华软信息有限公司（曾用名：广州华工信息软件有限公司）	2001-10-22	2023-07-28	I	65	软件和信息技术服务业	广东省	广州市	黄埔区	广州高新技术产业开发区科学城科汇二街13号901房（仅限办公用途）	113.441	23.174
701	广州华工信元通信技术有限公司	2001-03-07	2023-04-06	I	65	软件和信息技术服务业	广东省	广州市	天河区	广州市天河区华南理工大学26号楼附楼	113.352	23.1561
702	广州华凌制冷设备有限公司	2010-06-13	2023-04-03	E	49	建筑安装业	广东省	广州市	南沙区	广州市南沙区珠江街珠江工业园美德一路6号	113.542	22.7258
703	广州华南资讯科技有限公司	2000-06-08	2023-04-24	I	65	软件和信息技术服务业	广东省	广州市	天河区	广州市天河区中山大道西高新工业区建中路12号	113.379	23.1326
704	广州华炜科技有限公司（曾用名：广州华炜科技股份有限公司）	1998-05-15	2023-10-17	M	73	研究和试验发展	广东省	广州市	越秀区	广州市越秀区先烈中路69号1010房（仅限办公用途）	113.3	23.1424
705	广州华研精密机械股份有限公司（曾用名：广州华研精密机械有限公司）	2002-05-13	2022-10-13	C	35	专用设备制造业	广东省	广州市	增城区	广州市增城区宁西街创立路6号	113.627	23.1831
706	广州环峰能源科技股份有限公司（曾用名：广州环峰能源科技有限公司）	2011-01-20	2023-08-09	M	73	研究和试验发展	广东省	广州市	番禺区	广州市番禺区东环街番禺大道北555号天安总部中心6号楼301室	113.376	22.9852
707	广州环通信息技术有限公司	2012-04-05	2023-07-06	I	65	软件和信息技术服务业	广东省	广州市	南沙区	广州市南沙区南沙街环盛街1号2006房	113.591	22.7699
708	广州汇智通信技术有限公司	1999-06-30	2023-01-17	M	75	科技推广和应用服务业	广东省	广州市	天河区	广州市天河区中山大道西109号大院自编1号楼14楼（仅限办公用途）	113.373	23.1403
709	广州慧谷工程材料有限公司	2008-06-19	2022-06-09	C	26	化学原料和化学制品制造业	广东省	广州市	增城区	广州市增城中新镇大田村风门坳（土名）	113.639	23.2848
710	广州慧谷化学有限公司	1999-10-11	2022-07-05	C	26	化学原料和化学制品制造业	广东省	广州市	黄埔区	广州经济技术开发区新业路62号	113.291	23.0706
711	广州慧智微电子股份有限公司（曾用名：广州慧智微电子有限公司）	2011-11-11	2023-07-20	C	39	计算机、通信和其他电子设备制造业	广东省	广州市	黄埔区	广州市高新技术产业开发区科学城科学大道182号创新大厦C2第三层307单元	113.462	23.1723
712	广州机械科学研究院有限公司	1994-08-15	2023-08-16	M	73	研究和试验发展	广东省	广州市	黄埔区	广州市黄埔区茅岗路828号	113.446	23.1239
713	广州基迪奥生物科技有限公司	2012-02-20	2021-10-14	M	73	研究和试验发展	广东省	广州市	黄埔区	广州市黄埔区国际生物岛螺旋三路12号第七层703单元	113.379	23.0658
714	广州吉必盛科技实业有限公司	2001-02-28	2023-03-07	C	26	化学原料和化学制品制造业	广东省	广州市	黄埔区	广州市高新技术产业开发区科学城南翔三路15号	113.455	23.1546
715	广州吉欧电子科技有限公司	2011-05-17	2023-08-22	C	40	仪器仪表制造业	广东省	广州市	黄埔区	广州高新技术产业开发区科学城彩频路7号702、704	113.441	23.1694
716	广州极天信息技术股份有限公司（曾用名：广州极天信息技术有限公司）	2007-01-04	2023-07-07	I	65	软件和信息技术服务业	广东省	广州市	海珠区	广州市海珠区庭园路1号701房	113.375	23.1027
717	广州集泰化工股份有限公司（曾用名：广州集泰化工有限公司）	2006-08-10	2021-11-25	C	26	化学原料和化学制品制造业	广东省	广州市	黄埔区	广州市高新技术产业开发区南翔一路62号自编六栋二楼、五楼（仅限办公用途）	113.46	23.1626
718	广州暨南生物医药研究开发基地有限公司	2001-06-07	2021-04-16	M	73	研究和试验发展	广东省	广州市	天河区	广州市天河区暨南大学生命科学技术学院南楼五楼	113.353	23.1334
719	广州加士特密封技术有限公司	1995-12-29	2023-08-30	C	29	橡胶和塑料制品业	广东省	广州市	增城区	广州市增城区宁西街新誉北路1号	113.655	23.1893
720	广州万宝电机有限公司（曾用名：广州嘉特利微电机实业有限公司）	1988-12-09	2022-08-11	C	38	电气机械和器材制造业	广东省	广州市	从化区	广州市从化区城鳌大道东路1228号（A14厂房）	113.515	23.5834
721	广州简悦信息科技有限公司	2011-09-23	2021-09-28	M	73	研究和试验发展	广东省	广州市	天河区	广州市天河区高普路38号602房603房（仅限办公）	113.417	23.1914
722	广州健恩医疗设备有限公司	2010-08-19	2019-10-17	C	35	专用设备制造业	广东省	广州市	黄埔区	广州经济技术开发区东区骏成路10号办公楼2楼203房	113.522	23.1474
723	广州健新科技有限责任公司（曾用名：广州健新自动化科技有限公司）	2005-04-06	2023-09-26	I	65	软件和信息技术服务业	广东省	广州市	黄埔区	广州市黄埔区联和街道光谱中路11号2栋1单元14层02-04单位	113.451	23.1663
724	广州健迅科技有限公司	2000-08-15	2021-01-18	M	73	研究和试验发展	广东省	广州市	越秀区	广州市越秀区东风西路191号自然层十四层1610-11自编1612-18部位	113.261	23.1394
725	广东江河工程咨询有限公司（曾用名：广州江河水利水电工程咨询有限公司）	2010-08-11	2021-09-16	M	73	研究和试验发展	广东省	广州市	天河区	广州市天河区华庭路4号303房自编A（仅限办公）	113.336	23.1506
726	广州江南科友科技股份有限公司	1991-04-04	2023-10-23	M	73	研究和试验发展	广东省	广州市	海珠区	广州高新技术产业开发区科学城科学大道162号创意大厦B3区第2层202单元	113.458	23.1699
727	广州交信投科技股份有限公司（曾用名：广州交通信息化建设投资营运有限公司）	2003-08-08	2023-08-08	I	65	软件和信息技术服务业	广东省	广州市	黄埔区	广州市黄埔区科汇三街12号501房	113.443	23.1742
728	广州杰锐体育设施有限公司	2007-04-29	2023-10-30	R	89	体育	广东省	广州市	天河区	广州市天河区华夏路16号2605室（仅限办公）（不可作厂房使用）	113.328	23.1244
729	中电科普天科技股份有限公司（曾用名：广州杰赛科技股份有限公司）	1994-11-19	2023-10-30	E	49	建筑安装业	广东省	广州市	花都区	广州市花都区迎宾大道95号	113.233	23.4074
730	广州杰士莱电子有限公司	1999-10-21	2019-06-26	C	39	计算机、通信和其他电子设备制造业	广东省	广州市	花都区	广州市花都区花东镇金田路9号	113.352	23.4352
731	广州捷宝电子科技股份有限公司（曾用名：广州捷宝电子科技发展有限公司）	2006-06-08	2023-09-22	M	73	研究和试验发展	广东省	广州市	天河区	广州市经济技术开发区骏业路257号第三栋306号	113.524	23.1413
732	广州捷游软件有限公司	2012-06-07	2023-03-07	I	65	软件和信息技术服务业	广东省	广州市	天河区	广州市天河区高普路1021号5楼6402号	113.419	23.1792
733	广州金霸建材股份有限公司（曾用名：广州金霸建材有限公司）	1994-06-08	2023-08-08	C	30	非金属矿物制品业	广东省	广州市	荔湾区	广州市荔湾区文昌南路兴贤坊34号一楼自编106室	113.249	23.1229
734	广东图腾征信有限公司（曾用名：广州金电图腾软件有限公司）	1997-02-26	2023-03-09	I	65	软件和信息技术服务业	广东省	广州市	天河区	广州市天河区建中路55，57号六楼	113.379	23.1327
735	广州良源贸易发展有限公司（曾用名：广州金南磁塑有限公司）	1991-01-14	2019-11-30	F	51	批发业	广东省	广州市	增城区	广州市增城区增江街纬五路4号5栋3楼309房	113.855	23.2798
736	广州金升阳科技有限公司	1998-07-10	2022-06-22	M	73	研究和试验发展	广东省	广州市	黄埔区	广州市黄埔区南云四路8号	113.458	23.1519
737	广州金水动物保健品有限公司	2005-12-26	2023-08-11	C	27	医药制造业	广东省	广州市	白云区	广州市白云区雄伟博罗路32号101室	113.372	23.3911
738	广州金域医学检验中心有限公司	2003-04-28	2023-07-24	M	74	专业技术服务业	广东省	广州市	黄埔区	广州市黄埔区国际生物岛螺旋三路10号	113.378	23.0651
739	广州京维智能科技有限公司	2008-05-26	2021-06-30	M	74	专业技术服务业	广东省	广州市	天河区	广州市天河区高普路1035号201室（仅限办公）	113.418	23.1784
740	广州晶品智能压塑科技股份有限公司（曾用名：广州晶品包装机械有限公司）	2008-10-23	2023-02-13	C	35	专用设备制造业	广东省	广州市	黄埔区	广州市黄埔区云埔一路23号四栋101房、五栋101房	113.55	23.1516
741	广州璟涛机电设备有限公司	2008-08-04	2021-12-30	C	37	铁路、船舶、航空航天和其他运输设备制造业	广东省	广州市	天河区	广州市天河区沐陂东路5号4栋101房	113.409	23.1609
742	广州聚焦网络技术有限公司	2005-06-22	2021-07-22	M	73	研究和试验发展	广东省	广州市	越秀区	广州市越秀区水荫路117号星光映景5A层01至08室	113.318	23.149
743	广州聚能纳米生物科技股份有限公司（曾用名：广州聚能生物科技有限公司）	2005-02-28	2023-09-15	M	73	研究和试验发展	广东省	广州市	黄埔区	广州市高新技术产业开发区科学城起云路8号自编四栋一楼102	113.435	23.1738
744	广州凯恒科塑有限公司	2001-04-04	2020-04-14	C	38	电气机械和器材制造业	广东省	广州市	黄埔区	广州市萝岗区广汕路长安148号凯恒科技园	113.459	23.1974
745	广州康臣药业有限公司	1997-12-29	2022-12-05	C	27	医药制造业	广东省	广州市	黄埔区	广州萝岗区经济技术开发区东区东鹏大道７１号	113.53	23.136
746	广州康盛生物科技股份有限公司（曾用名：广州康盛生物科技有限公司）	2001-04-05	2022-07-21	M	73	研究和试验发展	广东省	广州市	黄埔区	广州高新技术产业开发区科学城神舟街8号	113.452	23.1916
747	广州柯维新数码科技有限公司	2011-01-17	2022-06-24	M	73	研究和试验发展	广东省	广州市	黄埔区	广州市黄埔区彩频路16号1栋217房	113.443	23.1679
748	广州科勒尔制冷设备有限公司	2010-02-01	2022-06-01	M	73	研究和试验发展	广东省	广州市	南沙区	广州市南沙区勤龙街120号101室	113.479	22.9047
749	广州科铭电气设备有限公司	2003-04-11	2023-04-23	C	38	电气机械和器材制造业	广东省	广州市	黄埔区	广州经济技术开发区云开路5号自编5号	113.539	23.1601
750	广州科启奥电子科技有限公司	2004-06-12	2022-10-09	C	39	计算机、通信和其他电子设备制造业	广东省	广州市	白云区	广州市白云区同和街同沙路283号广东天健家居装饰广场创意园区A栋2层自建房屋（自编AQ2138号）	113.341	23.1983
751	广州科微软件有限公司	2007-12-07	2023-01-29	I	64	互联网和相关服务	广东省	广州市	海珠区	广州市海珠区南洲路1331号226房自编B204室	113.285	23.1126
752	广州科易光电技术有限公司	2003-02-11	2023-09-25	C	37	铁路、船舶、航空航天和其他运输设备制造业	广东省	广州市	黄埔区	广州市黄埔区科学城科珠路203号1101房	113.443	23.1702
753	广州科苑新型材料有限公司	1998-05-15	2018-11-12	C	29	橡胶和塑料制品业	广东省	广州市	花都区	广州市花都区狮岭镇旗岭大街3号第一工业园	113.229	23.4707
754	广州拓尔思大数据有限公司（曾用名：广州科韵信息股份有限公司）	2001-12-20	2022-06-01	I	64	互联网和相关服务	广东省	广州市	天河区	广州市天河区科韵路天河软件园科韵园区建中路51-53号第2层（仅限办公）	113.381	23.1288
755	广州网律互联网科技有限公司（曾用名：广州快律网络科技有限公司）	2010-10-21	2023-06-07	R	86	新闻和出版业	广东省	广州市	天河区	广州市天河区高唐路235号906	113.409	23.1715
756	广州莱因智能装备股份有限公司（曾用名：广州莱因自动化设备有限公司）	2004-09-23	2021-12-30	M	73	研究和试验发展	广东省	广州市	黄埔区	广州市黄埔区埔北路16号	113.544	23.1373
757	广州蓝鸽软件有限公司	2005-01-10	2023-02-15	I	65	软件和信息技术服务业	广东省	广州市	白云区	广州市白云区北太路1633号民营科技园科创路1号	113.341	23.3015
758	广州立白企业集团有限公司	1998-02-25	2023-01-20	C	26	化学原料和化学制品制造业	广东省	广州市	荔湾区	广州市荔湾区陆居路二号	113.245	23.1074
759	广州励丰文化科技股份有限公司	1997-07-30	2023-07-03	R	88	文化艺术业	广东省	广州市	黄埔区	广州市高新技术产业开发区科学城科学大道8号自编一至六栋	113.426	23.1708
760	广州莲旺纸品有限公司	2002-04-15	2023-10-08	C	22	造纸和纸制品业	广东省	广州市	番禺区	广州市番禺区石基镇南浦村莲旺路6号	113.473	22.9714
761	广州联申数码科技有限公司	2006-07-04	2020-01-09	M	74	专业技术服务业	广东省	广州市	黄埔区	广州高新技术产业开发区科学城科学大道182号创新大厦C1区第五层503单元	113.463	23.1729
762	广州联图电子科技有限公司	2005-06-29	2017-08-14	M	73	研究和试验发展	广东省	广州市	天河区	广州市天河区中山大道105号华景新城华景路37号7楼701房	113.367	23.147
763	联奕科技股份有限公司（曾用名：广州联奕信息科技有限公司）	2004-07-05	2022-07-18	I	65	软件和信息技术服务业	广东省	广州市	天河区	广州市天河区科韵路16号自编1栋501	113.378	23.1314
764	广州联正达通信科技股份有限公司	2003-10-21	2021-07-06	M	73	研究和试验发展	广东省	广州市	天河区	广州市天河区科韵北路108号3楼自编A32房	113.39	23.1661
765	广州六合信息科技股份有限公司（曾用名：广州六合信息科技有限公司）	2011-08-16	2021-12-16	I	65	软件和信息技术服务业	广东省	广州市	海珠区	广州市海珠区南洲路1331号215房	113.353	23.0526
766	广州隆邦自动化控制设备有限公司	2011-05-26	2017-04-01	C	40	仪器仪表制造业	广东省	广州市	南沙区	广州市南沙区大岗镇潭洲北区私营工业村6号（临时经营场所）	113.396	22.7847
767	广州隆深机械有限公司	1998-01-23	2019-07-25	C	35	专用设备制造业	广东省	广州市	番禺区	广州市番禺区大龙街罗家路南约大街67号	113.397	22.9454
768	广州鹿山新材料股份有限公司	1998-11-12	2023-10-12	M	73	研究和试验发展	广东省	广州市	黄埔区	广州市黄埔区云埔工业区埔北路22号自编1栋、自编2栋、自编3栋、自编4栋	113.545	23.1377
769	广州洛图终端技术有限公司	2000-07-03	2021-01-04	C	39	计算机、通信和其他电子设备制造业	广东省	广州市	番禺区	广州市番禺区南村镇江南工业二区二横路1号之一4栋401室	113.372	23.0014
770	广州绿萃生物科技有限公司	2009-12-31	2023-04-21	M	73	研究和试验发展	广东省	广州市	黄埔区	广州高新技术产业开发区崖鹰石路8号2栋209	113.442	23.1829
771	广州绿色盈康生物工程有限公司	1993-08-04	2023-10-10	M	75	科技推广和应用服务业	广东省	广州市	海珠区	广州市海珠区新港西路135号大院中大蒲园区628栋中大科技园A座自编1108B房（仅限办公用途）	113.298	23.0991
772	广州迈得豪电子科技有限公司	2009-07-23	2019-05-14	M	73	研究和试验发展	广东省	广州市	天河区	广州市天河区员村二横路8号南侧之一403房（仅限办公用途）	113.371	23.1227
773	广东美电贝尔科技集团股份有限公司（曾用名：广州美电贝尔电业科技有限公司）	2004-04-19	2023-11-02	C	39	计算机、通信和其他电子设备制造业	广东省	广州市	天河区	广州市天河区思成路1号3层301号房	113.423	23.1784
774	广州美电恩智电子科技有限公司（曾用名：广州美电威视电子科技有限公司）	2008-06-16	2023-05-31	M	73	研究和试验发展	广东省	广州市	黄埔区	广州市黄埔区西成中街17号C栋401房	113.515	23.0813
775	广州美络信息科技有限公司	2003-04-30	2022-05-10	I	65	软件和信息技术服务业	广东省	广州市	越秀区	广州市越秀区环市东路498号22B房	113.315	23.1403
776	广州美瑞泰科生物工程技术有限公司	2011-01-14	2020-01-10	M	73	研究和试验发展	广东省	广州市	花都区	广州市花都区新华街新华工业区红棉大道48号4号厂房	113.176	23.4042
777	广州敏视数码科技有限公司	2003-03-26	2021-07-01	C	39	计算机、通信和其他电子设备制造业	广东省	广州市	天河区	广州市天河区瑞华路1号6栋101	113.395	23.1263
778	广州明动软件股份有限公司（曾用名：广州明动软件有限公司）	2004-12-23	2023-03-22	I	65	软件和信息技术服务业	广东省	广州市	天河区	广州市天河区白沙水路89号1-2层	113.357	23.1839
779	广州铭诚计算机科技有限公司	2007-12-26	2023-04-24	I	65	软件和信息技术服务业	广东省	广州市	天河区	广州市天河区体育西路109号22楼自编A、C单元（仅限办公）（不可做厂房使用）	113.328	23.1416
780	广州摩讯计算机科技有限公司	2002-09-05	2022-01-12	M	74	专业技术服务业	广东省	广州市	越秀区	广州市越秀区中山一路57号903-904房（仅限办公用途）	113.315	23.1336
781	广州纳斯威尔信息技术有限公司	2009-11-04	2023-10-25	I	65	软件和信息技术服务业	广东省	广州市	黄埔区	广州市黄埔区神舟路9号4栋329号	113.438	23.1753
782	广州耐奇电气科技有限公司	2004-12-04	2023-02-14	M	75	科技推广和应用服务业	广东省	广州市	黄埔区	广州市黄埔区科学大道182号C3栋403房	113.461	23.172
783	广州耐强机件制造有限公司	2003-06-13	2016-05-05	C	35	专用设备制造业	广东省	广州市	花都区	广州市花都区炭步镇蝉炭公路大达布	113.112	23.3479
784	广州中车轨道交通装备有限公司（曾用名：广州南车城市轨道装备有限公司）	2010-04-28	2023-08-30	C	37	铁路、船舶、航空航天和其他运输设备制造业	广东省	广州市	番禺区	广州市番禺区石壁街石三村福寿围	113.27	23.0095
785	广州南方测绘科技股份有限公司（曾用名：广州南方测绘仪器有限公司）	1998-10-06	2023-06-14	M	73	研究和试验发展	广东省	广州市	天河区	广州市天河区思成路39号	113.429	23.1852
786	广州南方电安科技有限公司（曾用名：广州南方电力集团电安建设有限公司）	1999-08-30	2023-03-02	E	49	建筑安装业	广东省	广州市	番禺区	广州市番禺区东环街万博翠湖花园万豪商业街107号首层	113.365	22.9821
787	广州南方电力集团电气技术有限公司（曾用名：广州南方电力集团电器有限公司）	1999-08-30	2023-05-04	E	49	建筑安装业	广东省	广州市	海珠区	广州市海珠区南石路11号	113.268	23.0805
788	广州南方电力集团科技发展有限公司	1999-08-30	2023-05-26	E	49	建筑安装业	广东省	广州市	海珠区	广州市海珠区江南大道穗花南街一号	113.283	23.1019
789	广州南侨食品有限公司	2005-09-16	2020-12-10	C	14	食品制造业	广东省	广州市	黄埔区	广州经济技术开发区东区联广路333号	113.54	23.1307
790	广州南天电脑系统有限公司	1992-01-20	2023-01-12	C	39	计算机、通信和其他电子设备制造业	广东省	广州市	天河区	广州市天河区建工路１号南天大厦五楼	113.38	23.13
791	广州南珠电控技术有限公司	2003-04-17	2023-06-19	M	73	研究和试验发展	广东省	广州市	天河区	广州市天河区中山大道西140号1627房（仅限办公用途）（不可作厂房使用）	113.365	23.1397
792	广州欧派集成家居有限公司	2007-03-05	2021-01-26	C	21	家具制造业	广东省	广州市	白云区	广州市白云区江高镇金沙北路2号	113.23	23.2804
793	广州鹏辉能源科技股份有限公司	2001-01-18	2023-10-30	C	38	电气机械和器材制造业	广东省	广州市	番禺区	广州市番禺区沙湾镇市良路（西村段）912号	113.39	22.9438
794	广州品唯软件有限公司	2012-12-06	2023-02-13	I	65	软件和信息技术服务业	广东省	广州市	荔湾区	广州市荔湾区芳村花海街20号自编6号楼（仅限办公）	113.237	23.1061
795	广州普金计算机科技股份有限公司	2000-11-21	2023-03-02	M	73	研究和试验发展	广东省	广州市	天河区	广州市天河区金穗路3号2801房自编A房	113.324	23.1306
796	广州启航全屋定制有限公司（曾用名：广州启航数码科技有限公司）	2005-01-26	2022-06-17	M	73	研究和试验发展	广东省	广州市	越秀区	广州市越秀区人民北路668号四楼406A房	113.264	23.142
797	青木数字技术股份有限公司（曾用名：广州青木信息科技有限公司）	2009-08-05	2022-05-31	M	73	研究和试验发展	广东省	广州市	海珠区	广州市海珠区凤和江贝村东海大街南32号001单元	113.326	23.0967
798	广州擎天实业有限公司	1996-03-14	2023-11-09	M	73	研究和试验发展	广东省	广州市	花都区	广州市花都区狮岭镇裕丰路16号	113.223	23.471
799	广州热点软件科技股份有限公司（曾用名：广州热点软件有限公司）	2007-09-20	2017-09-30	M	73	研究和试验发展	广东省	广州市	天河区	广州市天河区天河北路689号25F2房（不可作厂房）	113.348	23.1474
800	日立楼宇技术（广州）有限公司（曾用名：广州日滨科技发展有限公司）	2000-12-15	2023-05-25	M	75	科技推广和应用服务业	广东省	广州市	黄埔区	广州高新技术产业开发区科学城南翔三路2号	113.447	23.1543
801	广州日创电梯有限公司	2017-02-15	2023-04-25	C	34	通用设备制造业	广东省	广州市	海珠区	广州市海珠区仑头路64号之四201房	113.375	23.0896
802	荣邦科技有限公司（曾用名：广州荣邦计算机科技有限公司）	2009-07-07	2023-09-27	M	73	研究和试验发展	广东省	广州市	天河区	广州市天河区高普路1021号5楼6458号	113.419	23.1792
803	广州锐得森特种陶瓷科技有限公司	2004-07-02	2019-09-18	M	73	研究和试验发展	广东省	广州市	白云区	广州市白云区北太路1633号广州民营科技园科盛路8号配套服务大楼623-7房	113.342	23.302
804	瑞博奥（广州）生物科技股份有限公司（曾用名：广州瑞博奥生物科技有限公司）	2009-11-26	2021-06-17	M	73	研究和试验发展	广东省	广州市	黄埔区	广州高新技术产业开发区科学城瑞和路79号	113.508	23.1634
805	广州瑞尔医药科技有限公司	2010-09-19	2023-04-24	M	73	研究和试验发展	广东省	广州市	黄埔区	广州高新技术产业开发区科学城揽月路80号科技创新基地D区第6层601-603单元	113.458	23.1659
806	广州瑞松智能科技股份有限公司（曾用名：广州瑞松科技有限公司）	2012-08-08	2023-06-26	C	35	专用设备制造业	广东省	广州市	黄埔区	广州市黄埔区瑞祥路188号	113.526	23.1562
807	广州润虹医药科技股份有限公司（曾用名：广州润虹医药科技有限公司）	2004-12-16	2022-10-28	M	73	研究和试验发展	广东省	广州市	黄埔区	广州市黄埔区永盛路10号（6）栋第2层、第5层	113.58	23.228
808	广州飒特红外股份有限公司	1998-06-26	2022-09-09	C	39	计算机、通信和其他电子设备制造业	广东省	广州市	黄埔区	广州经济技术开发区港前工业区东江大道10号	113.529	23.0538
809	广州赛宝计量检测中心服务有限公司	2000-11-09	2023-02-03	C	40	仪器仪表制造业	广东省	广州市	增城区	广州市增城区朱村街朱村大道西78号9栋	113.69	23.2801
810	广州赛唯热工设备有限公司	1999-09-23	2021-11-25	C	34	通用设备制造业	广东省	广州市	番禺区	广州市番禺区石楼镇创启路63号创启13号楼（仅限办公用途）	113.465	22.9826
811	广州赛文软件开发有限公司	2008-12-18	2020-11-10	I	65	软件和信息技术服务业	广东省	广州市	海珠区	广州市海珠区新滘西路300号5楼自编005-1房	113.293	23.0799
812	广州三瑞医疗器械有限公司	1992-12-11	2020-08-24	C	18	纺织服装、服饰业	广东省	广州市	天河区	广州市天河区高科路38号5楼	113.416	23.1931
813	广州三业科技有限公司	1999-06-01	2022-05-25	M	73	研究和试验发展	广东省	广州市	越秀区	广州市越秀区先烈中路83号501自编之十二（仅限办公使用）（不可作厂房使用）	113.306	23.1479
814	广州森宝电器股份有限公司	2006-02-27	2022-04-28	C	38	电气机械和器材制造业	广东省	广州市	花都区	广州市花都区花山镇东湖安置区东华一路2号	113.262	23.4093
815	广东森下汽车技术有限公司（曾用名：广州森下电装科技有限公司）	2011-06-02	2023-08-31	C	38	电气机械和器材制造业	广东省	广州市	番禺区	广州市番禺区大龙街南约直街2号3栋	113.39	22.9562
816	广州商科信息科技有限公司	2005-01-13	2016-06-28	M	73	研究和试验发展	广东省	广州市	天河区	广州市天河区华夏路30号1205-1212房（不可作厂房用途）（仅限办公用途）	113.328	23.1318
817	广东神和新材料科技有限公司（曾用名：广州神和钢线制品有限公司）	2010-05-17	2022-05-07	M	73	研究和试验发展	广东省	广州市	从化区	广州市从化区太平镇广从南路998号G厂房（一址多照）	113.503	23.4669
818	广州胜亿信息科技有限公司（曾用名：广州胜亿交通信息软件有限公司）	2010-12-16	2023-01-05	C	39	计算机、通信和其他电子设备制造业	广东省	广州市	黄埔区	广州市黄埔区科学城彩频路7号之一101-2房（仅限办公）	113.442	23.1694
819	广州晟启能源设备有限公司	2003-07-31	2023-03-14	C	35	专用设备制造业	广东省	广州市	白云区	广州市白云区广州民营科技园民承二路162号晟启大厦	113.305	23.3017
820	广州晟烨信息科技股份有限公司（曾用名：广州晟烨信息科技有限公司）	2011-11-04	2023-10-10	M	75	科技推广和应用服务业	广东省	广州市	天河区	广州市天河区思成路19号宏太智慧谷五号楼2楼201（自编301）房	113.424	23.1796
821	广州市埃特斯通讯设备有限公司	2001-06-26	2023-03-02	C	39	计算机、通信和其他电子设备制造业	广东省	广州市	黄埔区	广州高新技术产业开发区科学城开源大道11号B2栋第三层	113.442	23.166
822	广州奥咨达医疗器械技术股份有限公司（曾用名：广州市奥咨达医疗器械技术服务有限公司）	2004-02-11	2022-07-08	M	73	研究和试验发展	广东省	广州市	黄埔区	广州市黄埔区广州国际生物岛螺旋大道87号第十四层	113.384	23.0732
823	广州澳视互动传媒有限公司（曾用名：广州市澳视光电子技术有限公司）	1998-10-22	2017-01-03	M	73	研究和试验发展	广东省	广州市	黄埔区	广州经济技术开发区科学城光谱西路3号厂房二楼西边南部	113.425	23.1648
824	广州市白云泵业集团有限公司	2001-04-13	2022-04-14	C	34	通用设备制造业	广东省	广州市	黄埔区	广州市黄埔区（中新广州知识城）九佛西路1395号	113.504	23.3875
825	广州白云科技股份有限公司（曾用名：广州市白云化工实业有限公司）	2000-02-02	2023-08-18	C	26	化学原料和化学制品制造业	广东省	广州市	白云区	广州市白云区广州民营科技园云安路1号	113.34	23.3076
826	广州市邦普电脑技术开发有限公司	2000-08-21	2022-06-24	C	39	计算机、通信和其他电子设备制造业	广东省	广州市	黄埔区	广州高新技术产业开发区南翔三路11号自编8栋	113.452	23.1547
827	广州市贝讯通信技术有限公司	2003-11-26	2021-07-12	I	65	软件和信息技术服务业	广东省	广州市	黄埔区	广州市黄埔区彩频路9号313房，314房	113.443	23.1684
828	广东贝源检测技术股份有限公司（曾用名：广州市贝源检测技术有限公司）	2010-09-13	2022-12-28	M	73	研究和试验发展	广东省	广州市	黄埔区	广州市高新技术产业开发区科学城光谱西路69号TCL文化产业园汇创空间201室	113.442	23.1663
829	广州市比丽普电子有限公司	2006-06-05	2019-03-08	C	39	计算机、通信和其他电子设备制造业	广东省	广州市	白云区	广州市白云区江高镇鹤云路17号5号厂房第二层	113.223	23.2737
830	广州市博卡利生物科技有限公司	2012-08-06	2020-09-21	C	26	化学原料和化学制品制造业	广东省	广州市	花都区	广州市花都区花山镇三东大道铁山河路美东工业园V1栋	113.261	23.4233
831	广州市城市规划勘测设计研究院有限公司（曾用名：广州市城市规划勘测设计研究院）	1998-04-23	2023-11-07	M	74	专业技术服务业	广东省	广州市	越秀区	广州市越秀区建设大马路10号	113.288	23.1412
832	广州市触通软件科技股份有限公司（曾用名：广州市触通软件科技有限公司）	2010-04-21	2020-06-02	I	65	软件和信息技术服务业	广东省	广州市	海珠区	广州市海珠区琶洲大道东8号606房A1210	113.378	23.1059
833	广州市德珑电子器件有限公司	2004-10-27	2021-12-23	C	39	计算机、通信和其他电子设备制造业	广东省	广州市	番禺区	广州市番禺区石基镇金山村华创动漫产业园B25号第四层	113.429	22.9999
834	广州市第二建筑工程有限公司	1954-11-12	2023-06-30	E	50	建筑装饰、装修和其他建筑业	广东省	广州市	越秀区	广州市越秀区法政路50号	113.279	23.1387
835	广州市第三建筑工程有限公司	1954-11-12	2023-06-26	E	50	建筑装饰、装修和其他建筑业	广东省	广州市	越秀区	广州市越秀区东风东路510号	113.286	23.1372
836	广州市东洋科技有限公司	1999-11-01	2016-12-28	M	73	研究和试验发展	广东省	广州市	黄埔区	广州高新技术产业开发区广州科学城科学大道182号C1区第八层801	113.304	23.1477
837	广州市动景计算机科技有限公司	2005-03-10	2023-07-07	M	73	研究和试验发展	广东省	广州市	天河区	广州市天河区高普路38号303房305房306房307房308房（仅限办公）	113.417	23.1914
838	广州市盾建建设有限公司（曾用名：广州市盾建地下工程有限公司）	1999-10-06	2023-06-29	E	48	土木工程建筑业	广东省	广州市	番禺区	广州市番禺区南村镇汇智三路25号1301房	113.352	23.0119
839	广东奥迪威传感科技股份有限公司（曾用名：广州市番禺奥迪威电子有限公司）	1999-06-23	2023-05-16	M	73	研究和试验发展	广东省	广州市	番禺区	广州市番禺区沙头街银平路3街4号	113.357	22.9617
840	广州市大川饲料有限公司（曾用名：广州市番禺区大川饲料有限公司）	2000-01-07	2023-03-03	C	13	农副食品加工业	广东省	广州市	南沙区	广州市南沙区东涌镇西樵村	113.396	22.8908
841	广州市霏鸿机电科技有限公司	2004-09-01	2020-04-03	C	35	专用设备制造业	广东省	广州市	花都区	广州市花都区芙蓉大道41号	113.228	23.4589
842	广州市丰海科技股份有限公司	2007-05-15	2021-06-23	M	73	研究和试验发展	广东省	广州市	黄埔区	广州市黄埔区开源大道11号B3栋101室、201室	113.502	23.1594
843	广州市风标电子技术有限公司	2007-03-16	2015-12-04	M	73	研究和试验发展	广东省	广州市	黄埔区	广州高新技术产业开发区科学城科珠路203号902A	113.443	23.1702
844	广州市福立分析仪器有限公司	2002-10-24	2021-11-11	C	40	仪器仪表制造业	广东省	广州市	荔湾区	广州市荔湾区威谷二街2号（自编号B6）801、802、803、804、805、806房	113.251	23.1318
845	广州市富可士数码科技有限公司	2005-06-06	2023-09-21	M	74	专业技术服务业	广东省	广州市	天河区	广州市天河区田头岗工业区二大道一横路一街2号自编B栋201房（可作厂房）	113.42	23.1743
846	广州市高科通信技术股份有限公司	1995-09-22	2022-11-09	M	73	研究和试验发展	广东省	广州市	天河区	广州市天河区高普路168号	113.416	23.1753
847	广州市高士实业有限公司	1999-06-15	2022-07-13	C	26	化学原料和化学制品制造业	广东省	广州市	白云区	广州市白云区广花三路360号1栋、2栋、3栋、C栋、F栋、G栋	113.248	23.3009
848	高新兴国迈科技有限公司（曾用名：广州市国迈科技有限公司）	2005-08-18	2023-09-08	I	64	互联网和相关服务	广东省	广州市	黄埔区	广州市黄埔区开创大道2819号2号楼701	113.464	23.181
849	广州市海林电子科技发展有限公司	2000-03-22	2023-10-23	C	39	计算机、通信和其他电子设备制造业	广东省	广州市	越秀区	广州市越秀区寺右新马路北一街三巷5号北侧首层（仅限办公）	113.315	23.1258
850	广州海同工业技术有限公司（曾用名：广州市海同机电设备有限公司）	2004-11-08	2023-07-07	M	73	研究和试验发展	广东省	广州市	白云区	广州市白云区西槎路799号首层	113.244	23.1857
851	广州市海维饲料有限公司	2002-10-17	2021-12-02	C	13	农副食品加工业	广东省	广州市	番禺区	广州市番禺区石壁街韦涌村花园脚	113.268	22.9833
852	广州市昊志机电股份有限公司	2006-12-14	2023-09-07	C	34	通用设备制造业	广东省	广州市	黄埔区	广州市黄埔区禾丰路68号	113.572	23.2156
853	浩云科技股份有限公司（曾用名：广州市浩云安防科技股份有限公司）	2001-03-08	2023-07-11	M	73	研究和试验发展	广东省	广州市	番禺区	广州市番禺区东环街番禺大道北555号天安总部中心22号楼101房	113.375	22.9874
854	合诚技术股份有限公司（曾用名：广州市合诚化学有限公司）	1996-04-17	2022-06-24	C	26	化学原料和化学制品制造业	广东省	广州市	天河区	广州市天河区珠江西路17号广晟国际大厦603-604	113.33	23.1308
855	广州市贺氏办公设备有限公司	2002-12-26	2019-12-04	C	39	计算机、通信和其他电子设备制造业	广东省	广州市	天河区	广州市天河区圣堂路圣堂工业区1号4楼	113.39	23.174
856	恒福茶文化股份有限公司（曾用名：广州市恒福茶业有限公司）	2005-12-09	2020-06-04	C	41	其他制造业	广东省	广州市	天河区	广州市天河区黄埔大道西76号盈隆广场2301、2303房（仅限办公用途，不可作厂房使用）	113.333	23.1326
857	广州市恒力检测股份有限公司（曾用名：广州市恒力安全检测技术有限公司）	2006-01-18	2023-09-01	M	73	研究和试验发展	广东省	广州市	黄埔区	广州市黄埔区西成中街10号F栋101房	113.516	23.0834
858	广州市恒联计算机科技有限公司	2002-09-26	2023-02-10	I	65	软件和信息技术服务业	广东省	广州市	天河区	广州市天河区天河北路898号3010房	113.352	23.1471
859	广州建筑园林股份有限公司（曾用名：广州市恒盛园林科技有限公司）	2004-09-15	2023-06-28	N	78	公共设施管理业	广东省	广州市	越秀区	广州市越秀区广仁路1号广仁大厦10楼	113.274	23.1343
860	广州市弘健生物医用制品科技有限公司	2002-08-01	2022-10-31	M	75	科技推广和应用服务业	广东省	广州市	黄埔区	广州市黄埔区香山路17号厂房B栋201房	113.446	23.1856
861	广州市红日燃具有限公司	1981-04-20	2021-04-22	C	38	电气机械和器材制造业	广东省	广州市	白云区	广州市白云区江高镇神山大道东650号	113.225	23.3345
862	广州市宏信电子科技有限公司	2000-09-08	2020-03-23	M	73	研究和试验发展	广东省	广州市	黄埔区	广州市黄埔区中新广州知识城亿创街1号406房之78	113.555	23.3308
863	鸿利智汇集团股份有限公司（曾用名：广州市鸿利光电股份有限公司）	2004-05-31	2021-12-03	M	73	研究和试验发展	广东省	广州市	花都区	广州市花都区花东镇先科一路1号	113.367	23.4511
864	广州市花都联华包装材料有限公司	2001-06-27	2023-08-16	C	23	印刷和记录媒介复制业	广东省	广州市	花都区	广州市花都区狮岭镇旗岭圩旗岭大街79号	113.232	23.4723
865	广州市华德工业有限公司	1997-09-03	2022-04-19	C	36	汽车制造业	广东省	广州市	黄埔区	广州高新技术产业开发区科学城南翔三路9号	113.451	23.1552
866	广州市华科尔科技股份有限公司（曾用名：广州市华科尔科技有限公司）	2001-07-12	2023-07-24	M	73	研究和试验发展	广东省	广州市	南沙区	广州市南沙区东涌镇太石工业区	113.408	22.8955
867	广州市华南橡胶轮胎有限公司	1988-12-03	2023-07-14	C	29	橡胶和塑料制品业	广东省	广州市	番禺区	广州市番禺区大石街石北工业路620号办公楼	113.296	23.0203
868	广州市环境保护工程设计院有限公司	1990-09-26	2023-05-15	E	48	土木工程建筑业	广东省	广州市	越秀区	广州市越秀区迴龙路增沙街20号2，3楼	113.275	23.1223
869	广州市汇洲电子科技有限公司	2008-06-18	2017-11-28	M	73	研究和试验发展	广东省	广州市	番禺区	广州市番禺区大石街植村工业四路19号二栋501	113.336	23.0137
870	广州市吉华勘测股份有限公司（曾用名：广州市吉华岩土检测有限公司）	2003-06-04	2021-10-19	M	74	专业技术服务业	广东省	广州市	番禺区	广州市番禺区大石街石北工业路684号（巨大创意产业园）12栋501、502、503、510号	113.292	23.0196
871	广州市暨华医疗器械有限公司	2000-05-10	2023-10-17	C	35	专用设备制造业	广东省	广州市	天河区	广州市天河区新塘田头岗工业区二大道一横路2号A栋二楼东	113.421	23.1739
872	广州市家庭通信科技有限公司	2012-06-11	2022-09-21	M	73	研究和试验发展	广东省	广州市	白云区	广州市白云区鹤龙街广云路鹤慧北街9号720室	113.29	23.2204
873	广州市嘉声音响设备有限公司	2004-10-21	2022-09-20	C	39	计算机、通信和其他电子设备制造业	广东省	广州市	白云区	广州市白云区江高镇杨山村石南路1号	113.175	23.3088
874	广州市健坤网络科技发展有限公司	2000-04-06	2023-02-24	I	65	软件和信息技术服务业	广东省	广州市	天河区	广州市天河区五山路省农业机械研究所办公楼A208--210室（本住所限写字楼功能）（不可作厂房使用）	113.352	23.1485
875	广州市将来网络科技有限公司	2009-02-23	2020-05-18	M	73	研究和试验发展	广东省	广州市	海珠区	广州市海珠区沥滘路100号大院18号C101-C103、C106、D101-D103、D105-D110、D112单元（仅限办公）	113.272	23.0902
876	广州市洁宝日用品有限公司	2011-04-06	2019-01-10	C	26	化学原料和化学制品制造业	广东省	广州市	白云区	广州市白云区鹤龙街鹤泰路10号702（自主申报）	113.28	23.2208
877	广州市今健医疗器械有限公司	1997-06-03	2017-12-01	C	35	专用设备制造业	广东省	广州市	黄埔区	广州高新技术产业开发区科学城开源大道11号A6栋第二、四层	113.502	23.1594
878	广州市金矢电子有限公司	2007-01-23	2021-03-19	C	39	计算机、通信和其他电子设备制造业	广东省	广州市	番禺区	广州市番禺区石楼镇华山路6号（机械厂房）	113.481	22.9674
879	金税信息技术服务股份有限公司（曾用名：广州市金税信息系统集成有限公司）	2003-08-04	2021-05-11	I	65	软件和信息技术服务业	广东省	广州市	天河区	广州市天河区明旭街1号524房	113.369	23.1304
880	广州市金禧信息技术服务有限公司	2000-06-22	2022-08-18	I	65	软件和信息技术服务业	广东省	广州市	天河区	广州市天河区东莞庄一横路133号自编7号楼601室（仅限办公）	113.346	23.1576
881	景森设计股份有限公司（曾用名：广州市景森工程设计顾问有限公司）	2001-07-11	2022-07-05	M	74	专业技术服务业	广东省	广州市	天河区	广州市天河区燕岭路133号自编2号楼1区-A区	113.336	23.1689
882	广州市久邦数码科技有限公司	2003-06-04	2022-05-24	I	65	软件和信息技术服务业	广东省	广州市	越秀区	广州市越秀区中山三路33号A塔1701房（自编）“中华国际中心”A塔17楼1703-1、1704-1706、1708、1707单元	113.289	23.1317
883	广州市巨亮光电科技股份有限公司	2011-06-24	2020-09-14	C	39	计算机、通信和其他电子设备制造业	广东省	广州市	从化区	广州市从化温泉镇永和路38号	113.662	23.578
884	3M材料技术（广州）有限公司	2005-04-12	2022-02-14	C	26	化学原料和化学制品制造业	广东省	广州市	黄埔区	广州高新技术产业开发区科学城南翔二路9号	113.448	23.1608
885	宝纺（广州）纺织科技有限公司	2006-09-29	2021-06-07	C	18	纺织服装、服饰业	广东省	广州市	黄埔区	广州经济技术开发区永和经济区新业路68号	113.291	23.0707
886	广州瑞松北斗汽车装备有限公司（曾用名：北斗（广州）汽车装备有限公司）	2007-04-27	2022-09-22	C	36	汽车制造业	广东省	广州市	黄埔区	广州市黄埔区瑞祥路188号	113.526	23.1562
887	北明软件有限公司（曾用名：北明软件股份有限公司）	1998-03-31	2023-09-07	I	65	软件和信息技术服务业	广东省	广州市	天河区	广州市天河区思成路1号北明软件大楼7、8层	113.423	23.1789
888	博创智能装备股份有限公司（曾用名：博创机械股份有限公司）	2002-12-26	2023-03-30	C	35	专用设备制造业	广东省	广州市	增城区	广州市增城区新塘镇新祥路9号	113.638	23.173
889	从兴技术有限公司	1999-09-20	2022-07-25	I	65	软件和信息技术服务业	广东省	广州市	越秀区	广州市越秀区寺右新马路174号14楼自编A	113.319	23.1246
890	广州珐玛珈智能设备股份有限公司（曾用名：珐玛珈（广州）包装设备有限公司）	2002-10-15	2023-01-16	C	34	通用设备制造业	广东省	广州市	黄埔区	广州经济技术开发区永和经济区黄旗山路16号	113.548	23.2119
891	番禺珠江钢管有限公司	1993-06-07	2022-05-09	C	31	黑色金属冶炼和压延加工业	广东省	广州市	番禺区	广州市番禺区石基镇清河路	113.392	22.9409
892	方欣科技有限公司	1998-07-17	2023-10-17	I	65	软件和信息技术服务业	广东省	广州市	黄埔区	广州市黄埔区科学大道82-88号（双号）（C3）栋901房	113.436	23.1689
893	高新兴科技集团股份有限公司	1997-11-14	2022-06-13	C	39	计算机、通信和其他电子设备制造业	广东省	广州市	黄埔区	广东省广州市黄埔区科学城开创大道2819号六楼	113.464	23.181
894	公诚管理咨询有限公司	2000-03-01	2023-07-24	M	74	专业技术服务业	广东省	广州市	天河区	广州市天河区中山大道西89号A栋9层908-911房（仅限办公）	113.363	23.1409
895	广东安居宝数码科技股份有限公司	2004-12-29	2023-06-02	M	74	专业技术服务业	广东省	广州市	黄埔区	广州高新技术产业开发区科学城起云路6号自编一栋	113.434	23.173
896	广东奥迪动漫玩具有限公司	2007-03-08	2022-05-31	C	24	文教、工美、体育和娱乐用品制造业	广东省	广州市	黄埔区	广州市黄埔区知文二街1号（自编A08）405室	113.487	23.1875
897	广东倍智人才科技股份有限公司（曾用名：广东倍智人才管理咨询有限公司）	2011-01-18	2022-04-27	M	73	研究和试验发展	广东省	广州市	天河区	广州市天河区黄埔大道西76号3010室	113.354	23.1358
898	广东碧德生物科技有限公司	2002-10-25	2023-03-15	C	27	医药制造业	广东省	广州市	黄埔区	广州市萝岗区神舟路790号A-2三楼	113.451	23.1899
899	广东波斯科技股份有限公司	1998-10-23	2020-11-06	M	73	研究和试验发展	广东省	广州市	黄埔区	广州市萝岗区云庆路7号	113.542	23.1404
900	广东仟张信息技术有限公司（曾用名：广东铂亚信息技术股份有限公司）	1999-08-20	2023-02-02	I	65	软件和信息技术服务业	广东省	广州市	番禺区	广州市番禺区番禺大道北555号番禺节能科技园内天安总部中心2号楼1201房	113.378	22.9848
901	超讯通信股份有限公司（曾用名：广东超讯通信技术股份有限公司）	1998-08-28	2023-09-08	C	39	计算机、通信和其他电子设备制造业	广东省	广州市	天河区	广州市天河区高普路1025号4楼401室	113.419	23.1788
902	广东村村通科技有限公司	2004-09-21	2023-01-13	I	65	软件和信息技术服务业	广东省	广州市	黄埔区	广东省广州市萝岗区广州开发区科学城彩频路7号202房	113.441	23.1694
903	广东德生科技股份有限公司（曾用名：广东德生科技有限公司）	1999-08-13	2023-07-26	C	39	计算机、通信和其他电子设备制造业	广东省	广州市	天河区	广东省广州市天河区软件路15号第二层201室、三、四层	113.42	23.1773
904	广东迪美生物技术有限公司	2002-12-11	2022-03-25	C	27	医药制造业	广东省	广州市	黄埔区	广州市黄埔区瑞和路39号F1栋501房	113.511	23.158
905	广东东硕科技有限公司	2002-10-28	2022-03-21	M	75	科技推广和应用服务业	广东省	广州市	白云区	广州市白云区北太路1633号广州民营科技园科兴路2号绿地汇创广场1栋26层2621房	113.336	23.3081
906	广东飞达交通工程有限公司	1993-12-10	2021-10-14	I	65	软件和信息技术服务业	广东省	广州市	黄埔区	广东省广州市黄埔区科学大道50号A3栋20层	113.438	23.1708
907	广东芬尼克兹节能设备有限公司	2002-04-16	2021-12-29	M	73	研究和试验发展	广东省	广州市	南沙区	广州市南沙区大岗镇天元路3号（自编1栋）	113.397	22.8048
908	广东高捷航运物流有限公司	2004-04-28	2022-09-27	G	58	多式联运和运输代理业	广东省	广州市	白云区	广州市白云区广园中路158号308室	113.277	23.1645
909	冠昊生物科技股份有限公司（曾用名：广东冠昊生物科技股份有限公司）	1999-10-22	2019-07-04	C	27	医药制造业	广东省	广州市	黄埔区	广东省广州市黄埔区玉岩路12号	113.539	23.1762
910	广东冠生土木工程技术股份有限公司（曾用名：广东冠生土木工程技术有限公司）	2004-09-06	2023-07-10	E	48	土木工程建筑业	广东省	广州市	番禺区	广东省广州市番禺区石碁镇华创动漫产业园二期6号楼701单元	113.432	22.9971
911	广东光泰激光科技有限公司	2003-09-11	2023-05-23	C	39	计算机、通信和其他电子设备制造业	广东省	广州市	黄埔区	广东省广州市黄埔区广州开发区南翔一路62号自编六栋一楼东南部101房	113.46	23.1626
912	广东广建项目管理有限公司	2006-01-04	2023-01-11	L	72	商务服务业	广东省	广州市	越秀区	广州市越秀区广仁路1号广仁大厦自编1302、1303、1304室	113.274	23.1343
913	广东广兴牧业机械设备有限公司	1994-04-06	2021-07-06	C	35	专用设备制造业	广东省	广州市	天河区	广东省广州市天河区石牌五山路261号大院自编31号楼	113.373	23.1403
914	广东国地规划科技股份有限公司（曾用名：广东国地规划科技有限公司）	2005-06-03	2021-07-20	I	65	软件和信息技术服务业	广东省	广州市	天河区	广东省广州市天河区长福路219号H1房	113.355	23.172
915	广东国光电子有限公司	2002-09-23	2021-03-03	C	38	电气机械和器材制造业	广东省	广州市	花都区	广州市花都区新雅街镜湖大道8号	113.256	23.3798
916	广东海大集团股份有限公司	2004-01-08	2021-08-25	M	73	研究和试验发展	广东省	广州市	番禺区	广东省广州市番禺区南村镇万博四路42号2座701	113.358	23.0167
917	广东和新科技有限公司	2000-07-28	2022-09-26	C	39	计算机、通信和其他电子设备制造业	广东省	广州市	天河区	广州市天河区华观路1933号1004房、1005房、1006房	113.409	23.1752
918	广东华南水电高新技术开发有限公司	1993-04-26	2022-11-29	M	73	研究和试验发展	广东省	广州市	天河区	广州市天河区天寿路105号901、902、903、904、905、1001、1002、1003、1004、1005、1006房	113.339	23.1538
919	广东华隧建设集团股份有限公司（曾用名：广东华隧建设股份有限公司）	2008-06-05	2022-01-27	E	47	房屋建筑业	广东省	广州市	花都区	广东省广州市花都区新华街迎宾大道95号交通局大楼13楼1308室	113.233	23.4075
920	广东华讯工程有限公司	1999-02-05	2021-05-11	I	65	软件和信息技术服务业	广东省	广州市	天河区	广东省广州市天河区花城大道20号701房	113.324	23.1245
921	广东环凯微生物科技有限公司	1993-09-06	2021-06-11	M	73	研究和试验发展	广东省	广州市	黄埔区	广州市萝岗区广州开发区科学城神舟路788号	113.451	23.1898
922	广东汇香源生物科技股份有限公司	2002-12-05	2023-09-01	C	26	化学原料和化学制品制造业	广东省	广州市	黄埔区	广州市黄埔区埔北路6号自编二栋	113.543	23.1369
923	广东佳德环保科技有限公司	2003-09-16	2023-06-25	M	74	专业技术服务业	广东省	广州市	黄埔区	广东省广州市黄埔区科学城光谱西路69号TCL文化产业园文创楼102室及201-224室	113.443	23.1657
924	广东浆纸交易所股份有限公司	2011-08-05	2021-05-24	L	72	商务服务业	广东省	广州市	黄埔区	广州市黄埔区光谱中路11号的云升科学园物业2栋2单元05层全层	113.451	23.1662
925	广东精一信息技术有限公司（曾用名：广东精一规划信息科技有限公司）	2002-03-05	2023-10-31	I	65	软件和信息技术服务业	广东省	广州市	天河区	广州市天河区天河科技园高新技术产业开发区首期工业园建工路9号5楼北区502、504、506、508、510、512、516、518号	113.379	23.1294
926	广东九博科技股份有限公司（曾用名：广东九博电子科技有限公司）	2001-02-05	2020-07-21	C	39	计算机、通信和其他电子设备制造业	广东省	广州市	天河区	广东省广州市天河区思成路23号229室	113.423	23.18
927	广东俊尼尔科技有限公司（曾用名：广东俊尼尔节能环保科技有限公司）	2011-12-02	2023-08-03	M	73	研究和试验发展	广东省	广州市	黄埔区	广州市黄埔区科学大道122、124号1401房	113.437	23.1689
928	广东骏丰频谱股份有限公司	1995-04-24	2023-11-03	C	35	专用设备制造业	广东省	广州市	黄埔区	广东省广州市黄埔区骏丰路38号自编2栋	113.56	23.099
929	广东卡特能源科技有限公司	2004-12-29	2022-04-26	M	73	研究和试验发展	广东省	广州市	番禺区	广州市番禺区南村镇西福庄东大路一街2号301房	113.362	22.9985
930	凯通科技股份有限公司（曾用名：广东凯通软件开发有限公司）	2000-04-26	2023-09-01	I	65	软件和信息技术服务业	广东省	广州市	黄埔区	广东省广州市萝岗区开发区科汇三街12号1001房、1101房	113.443	23.1742
931	广东兰贝斯科技有限公司（曾用名：广东兰贝斯信息科技有限公司）	1996-12-16	2021-09-17	M	73	研究和试验发展	广东省	广州市	天河区	广州市天河区林和中路156号6楼（部位：自编02、03单元）（不可作厂房使用）	113.333	23.1529
932	广东亮美集照明科技有限公司	2001-08-14	2018-05-28	C	38	电气机械和器材制造业	广东省	广州市	花都区	广州市花都区花东镇先科一路3号（可作厂房使用）	113.37	23.4505
933	广东米卡电子科技有限公司	2009-09-24	2023-07-05	M	73	研究和试验发展	广东省	广州市	天河区	广州市天河区天河路592号2513房	113.346	23.14
934	广东铭鸿数据有限公司	1999-11-30	2022-03-18	I	65	软件和信息技术服务业	广东省	广州市	越秀区	广东省广州市越秀区五羊新城寺右新马路174号5楼B	113.319	23.1246
935	广东南方传媒科技发展有限公司	2010-11-22	2017-08-23	M	73	研究和试验发展	广东省	广州市	越秀区	广州市越秀区先烈中路83号501自编-1	113.306	23.1479
936	广东南方海岸科技服务有限公司	2001-07-09	2023-10-30	I	65	软件和信息技术服务业	广东省	广州市	黄埔区	广东省广州市萝岗区高新技术产业开发区科学城海云路88号办研大楼A-253号房	113.454	23.1494
937	广东南方数码科技股份有限公司（曾用名：广东南方数码科技有限公司）	2003-01-03	2023-09-28	M	74	专业技术服务业	广东省	广州市	天河区	广州市天河区科韵路24、26号四楼	113.381	23.1295
938	广东南方通信建设有限公司	1993-10-09	2023-02-20	I	65	软件和信息技术服务业	广东省	广州市	天河区	广州市天河区中山大道华景路1号南方通信大厦24—25楼	113.364	23.1409
939	广东南方新媒体股份有限公司（曾用名：广东南方新媒体发展有限公司）	2010-07-12	2022-09-21	I	65	软件和信息技术服务业	广东省	广州市	越秀区	广州市越秀区人民北路686号自编25幢411房（仅限办公用途）	113.264	23.1439
940	广东南方信息安全产业基地有限公司	2004-03-19	2022-08-24	I	65	软件和信息技术服务业	广东省	广州市	黄埔区	广州市黄埔区彩频路9号1201-1房	113.443	23.1684
941	广东南航天合信息科技有限公司	2010-09-10	2021-08-09	I	65	软件和信息技术服务业	广东省	广州市	黄埔区	广州市黄埔区玉岩路12号冠昊科技园区一期办公楼三楼301室（自主申报）	113.54	23.1771
942	中通服建设有限公司（曾用名：广东省电信工程有限公司）	1986-12-05	2022-03-02	E	49	建筑安装业	广东省	广州市	越秀区	广州市越秀区原道路17号（道路货物运输代理仅限非首层办公用房经营）	113.299	23.1438
943	广东省电信规划设计院有限公司	1992-04-13	2023-04-11	I	63	电信、广播电视和卫星传输服务	广东省	广州市	天河区	广州市天河区中山大道华景路1号11-19层	113.364	23.1409
944	广东省电子技术研究所	1993-01-06	2018-08-20	M	73	研究和试验发展	广东省	广州市	天河区	广州市天河区中山大道西６１－６５号	113.355	23.142
945	广东省交通规划设计研究院集团股份有限公司（曾用名：广东省公路勘察规划设计院股份有限公司）	1993-09-28	2022-01-07	M	74	专业技术服务业	广东省	广州市	白云区	广东省广州市白云区黄边北路146号	113.29	23.2292
946	广东省金稻种业有限公司	2001-09-13	2023-08-02	G	59	装卸搬运和仓储业	广东省	广州市	黄埔区	广东省广州市开发区永和经济区摇田河大街79号309室	113.569	23.2008
947	广东省南方环保生物科技有限公司	1987-12-15	2023-02-27	N	77	生态保护和环境治理业	广东省	广州市	黄埔区	广州市黄埔区黄埔大道东844号501房（自编号1）	113.476	23.1017
948	广东省石油化工研究院	1992-04-08	2020-01-08	M	73	研究和试验发展	广东省	广州市	天河区	广州市天河区棠下车陂西路318号	113.39	23.1431
949	广东省水利电力勘测设计研究院有限公司（曾用名：广东省水利电力勘测设计研究院）	1995-11-07	2020-10-22	N	76	水利管理业	广东省	广州市	荔湾区	广州市荔湾区荔湾路陈家祠道４８号	113.251	23.1329
950	广东省信息工程有限公司	1987-08-01	2022-12-21	E	50	建筑装饰、装修和其他建筑业	广东省	广州市	黄埔区	广东省广州市黄埔区科学大道50号自编A3栋1401房	113.438	23.1708
951	广东思东利电力科技有限公司	2011-06-10	2015-06-18	C	38	电气机械和器材制造业	广东省	广州市	花都区	广州市花都区狮岭镇新庄村	113.241	23.4888
952	广东塑料交易所股份有限公司	2004-03-23	2019-05-16	G	55	水上运输业	广东省	广州市	荔湾区	广东省广州市荔湾区东沙大道广州圆路1号广州圆大厦7楼	113.264	23.0569
953	广东太平洋互联网信息服务有限公司	2002-11-27	2022-08-11	I	64	互联网和相关服务	广东省	广州市	天河区	广州市天河区高普路115号1栋301房	113.421	23.1825
954	广东天普生化医药股份有限公司	1993-03-25	2023-03-15	C	27	医药制造业	广东省	广州市	天河区	广州市天河区天河高唐科技产业园高普路８９号	113.418	23.1901
955	广东同益空气能科技股份有限公司（曾用名：广东同益电器有限公司）	1999-06-09	2021-05-19	M	75	科技推广和应用服务业	广东省	广州市	荔湾区	广州市荔湾区桥中中路159号二十层2001-2010房（仅限办公）	113.224	23.1351
956	广东拓奇电力技术发展有限公司	1994-09-28	2022-09-15	M	74	专业技术服务业	广东省	广州市	黄埔区	广州市黄埔区科学城科汇发展中心科汇三街6号六楼（仅限办公）	113.443	23.1735
957	广东王牌网络科技有限公司	2006-03-16	2021-06-01	I	65	软件和信息技术服务业	广东省	广州市	海珠区	广州市海珠区新港东路2433号二楼自编207房A20房（仅限办公）	113.407	23.1027
958	威创集团股份有限公司（曾用名：广东威创视讯科技股份有限公司）	2002-08-23	2023-09-21	C	39	计算机、通信和其他电子设备制造业	广东省	广州市	黄埔区	广州高新技术产业开发区科珠路233号	113.444	23.1758
959	广东卫城锦峰数码科技有限公司	2012-07-23	2017-08-03	M	73	研究和试验发展	广东省	广州市	天河区	广州市天河区建中路26号306室（仅限办公用途）	113.378	23.131
960	广东新大禹环境科技股份有限公司（曾用名：广东新大禹环境工程有限公司）	1997-05-13	2021-11-25	N	77	生态保护和环境治理业	广东省	广州市	黄埔区	广东省广州市开发区科学城科汇二街17号101房	113.441	23.1745
961	广东新科迪环保科技有限公司	2006-07-13	2022-09-23	M	75	科技推广和应用服务业	广东省	广州市	越秀区	广州市越秀区春风路1号，3号之5	113.32	23.123
962	广东新南都饲料科技有限公司	2006-02-21	2023-11-06	C	13	农副食品加工业	广东省	广州市	天河区	广州市天河区五山镇大丰一街1号广东省农业科学院畜牧研究所A区1号	113.372	23.1617
963	广东新支点技术服务有限公司	2004-02-27	2023-06-02	I	65	软件和信息技术服务业	广东省	广州市	黄埔区	广州市黄埔区伴河路190号自编A栋10层1001	113.515	23.1657
964	广东鑫程电子科技有限公司	2005-11-22	2016-12-06	M	74	专业技术服务业	广东省	广州市	黄埔区	广州市高新技术产业开发区科学大道111号主楼201自编之7房	113.304	23.1477
965	广东旭普空间信息技术产业发展有限公司	2002-04-01	2022-06-20	I	65	软件和信息技术服务业	广东省	广州市	天河区	广州市天河区高普路38号4栋105房（仅限办公）	113.417	23.1914
966	广东轩辕网络科技股份有限公司	1998-03-02	2023-02-13	I	65	软件和信息技术服务业	广东省	广州市	天河区	广州市天河区高普路1033号第8层	113.418	23.178
967	广东讯飞启明科技发展有限公司	2004-01-02	2023-02-03	I	65	软件和信息技术服务业	广东省	广州市	黄埔区	广州市黄埔区科学城天丰路3号401房	113.468	23.1661
968	广东迅通科技股份有限公司	1996-08-19	2019-09-01	M	73	研究和试验发展	广东省	广州市	越秀区	广州市越秀区先烈中路80号12层	113.302	23.1426
969	广东海格怡创科技有限公司（曾用名：广东怡创科技股份有限公司）	2000-02-01	2023-03-24	I	65	软件和信息技术服务业	广东省	广州市	天河区	广州市天河区海安路13号之一财富世纪广场A1栋19层1901-1904	113.347	23.1305
970	宜通世纪科技股份有限公司（曾用名：广东宜通世纪科技股份有限公司）	2001-10-09	2022-09-29	E	49	建筑安装业	广东省	广州市	天河区	广州市天河区科韵路16号自编1栋1201	113.378	23.1314
971	广东亿迅科技有限公司	2001-11-20	2023-08-24	M	74	专业技术服务业	广东省	广州市	天河区	广州市天河区花城大道777号	113.358	23.1238
972	广东易美图影像科技股份有限公司	2000-08-15	2021-07-28	M	75	科技推广和应用服务业	广东省	广州市	黄埔区	广州市黄埔区科学城天泰一路2号5栋306室	113.469	23.1668
973	广东永顺生物制药股份有限公司	2002-12-24	2023-05-23	C	27	医药制造业	广东省	广州市	黄埔区	广东省广州市黄埔区田园西路35号	113.551	23.2008
974	广东用友软件有限公司	1994-05-06	2023-05-26	I	65	软件和信息技术服务业	广东省	广州市	越秀区	广东省广州市越秀区先烈中路83号505自编之一	113.306	23.1479
975	广东宇天科技有限公司	2006-01-27	2022-05-18	I	65	软件和信息技术服务业	广东省	广州市	天河区	广州市天河区中山大道西6、8号第16-17层自编1606号	113.373	23.1403
976	广东源恒软件科技有限公司	2010-10-21	2023-04-04	M	73	研究和试验发展	广东省	广州市	天河区	广州市天河区黄埔大道西108号（自编B栋）1308房（不可作厂房使用）（仅限办公）	113.344	23.132
977	广东粤恒电力科技有限公司	2011-01-04	2023-07-14	M	74	专业技术服务业	广东省	广州市	天河区	广州市天河区员村一横路7号大院1号自编之8层801房（仅限办公）（不可作厂房使用）	113.369	23.1272
978	广州瀚粤科技有限公司（曾用名：广东粤铁瀚阳科技有限公司）	2011-11-23	2022-08-25	M	73	研究和试验发展	广东省	广州市	天河区	广州市天河区天河路228号之一2009（广晟大厦电梯层2209）房	113.334	23.1383
979	广东粤微食用菌技术有限公司	1998-11-16	2022-01-12	C	14	食品制造业	广东省	广州市	黄埔区	广州市黄埔区（广州高新技术产业开发区）神舟路792号	113.451	23.1898
980	广东掌中万维电子有限公司	2000-11-15	2022-07-29	M	73	研究和试验发展	广东省	广州市	越秀区	广州市越秀区寺右南路97号三楼自编306、307、308单元	113.316	23.1229
981	广东中科华大工程技术检测有限公司	2003-09-05	2014-11-03	M	74	专业技术服务业	广东省	广州市	黄埔区	广东省广州市萝岗区(中新广州知识城)凤凰三路17号自编407室	113.505	23.3998
982	广州同汇盛南站产业发展有限公司（曾用名：广东中钰科技有限公司）	2000-09-19	2023-08-24	M	73	研究和试验发展	广东省	广州市	番禺区	广州市番禺区石壁街兴宏一街3号	113.305	22.9678
983	广东卓亚电气实业有限公司	2009-11-30	2020-06-10	C	38	电气机械和器材制造业	广东省	广州市	黄埔区	广州市萝岗区永和街贤江路9号	113.553	23.2104
984	广州艾科新材料股份有限公司	2005-06-27	2020-09-25	C	26	化学原料和化学制品制造业	广东省	广州市	黄埔区	广州市经济技术开发区东区骏功路18号	113.531	23.1372
985	广州爱奇实业有限公司	2002-07-10	2020-03-13	C	24	文教、工美、体育和娱乐用品制造业	广东省	广州市	增城区	广州市增城区中新镇新新路2号	113.623	23.2762
986	广州安必平医药科技股份有限公司	2005-07-06	2023-09-19	M	73	研究和试验发展	广东省	广州市	黄埔区	广州市黄埔区科信街2号	113.43	23.1779
987	广州安达精密工业股份有限公司	2003-05-12	2022-06-20	C	36	汽车制造业	广东省	广州市	白云区	广州市白云区太和镇（广州市民营科技园内）	113.305	23.3017
988	广州安浚信息技术有限公司	2007-09-03	2023-09-19	I	65	软件和信息技术服务业	广东省	广州市	越秀区	广州市越秀区农林下路5号16楼自编1602室（一址多照）	113.301	23.1314
989	广州安普达电子技术有限公司	2008-11-16	2019-01-25	M	74	专业技术服务业	广东省	广州市	黄埔区	广州市黄埔区水西路195号（自编D1栋）1013房	113.49	23.1982
990	奥格科技股份有限公司（曾用名：广州奥格智能科技有限公司）	2002-07-15	2022-08-05	M	74	专业技术服务业	广东省	广州市	天河区	广州市天河区高普路1029、1031号201室（仅限办公）	113.419	23.1784
991	广州奥太制冷设备有限公司	2005-05-30	2023-11-10	C	34	通用设备制造业	广东省	广州市	从化区	广州市从化明珠工业园区吉祥二路9号自编号之一	113.536	23.6234
992	广州奥图弹簧有限公司	1998-03-12	2022-07-25	C	34	通用设备制造业	广东省	广州市	黄埔区	广州市经济技术开发区东区沧联小迳东路	113.557	23.1266
993	广州白云电器设备股份有限公司	1989-07-05	2023-04-11	C	38	电气机械和器材制造业	广东省	广州市	白云区	广州市白云区神山镇大岭南路18号	113.209	23.3414
994	广州白云蓝天电子科技有限公司	1998-08-30	2020-03-31	M	73	研究和试验发展	广东省	广州市	黄埔区	广州市高新技术产业开发区科学城神舟路885号生产中心二D栋	113.452	23.1906
995	广州白云山陈李济药厂有限公司	1959-09-24	2022-10-20	C	27	医药制造业	广东省	广州市	海珠区	广州市海珠区广州大道南１６８８号	113.332	23.2055
996	广州白云山汉方现代药业有限公司	1998-09-24	2023-10-31	C	27	医药制造业	广东省	广州市	从化区	广州市从化温泉大道8号	113.628	23.5971
997	广州白云山和记黄埔中药有限公司	2005-04-12	2022-06-09	C	27	医药制造业	广东省	广州市	白云区	广州市白云区沙太北路389号	113.344	23.2021
998	广州白云山敬修堂药业股份有限公司	1992-12-01	2022-11-04	M	73	研究和试验发展	广东省	广州市	荔湾区	广州市荔湾区人民南路179号	113.259	23.1201
999	广州白云山明兴制药有限公司	1962-12-27	2020-07-06	C	27	医药制造业	广东省	广州市	海珠区	广州市海珠区工业大道北48号	113.261	23.1021
1000	广州白云山潘高寿药业股份有限公司	1993-03-04	2023-09-14	M	73	研究和试验发展	广东省	广州市	番禺区	广州市番禺区东环街天保路11号	113.374	22.9746
1001	广州白云山奇星药业有限公司	1993-12-31	2023-06-13	C	27	医药制造业	广东省	广州市	海珠区	广州市海珠区新港中路赤岗北路33号	113.334	23.1051
1002	广州白云山天心制药股份有限公司	1993-01-28	2020-07-14	C	27	医药制造业	广东省	广州市	海珠区	广州市海珠区滨江东路808号	113.316	23.108
1003	广州白云山星群（药业）股份有限公司	1993-06-18	2023-11-07	M	73	研究和试验发展	广东省	广州市	海珠区	广州市海珠区南洲路162号	113.304	23.0694
1004	广州白云山医药集团股份有限公司	1997-09-01	2020-06-24	C	27	医药制造业	广东省	广州市	荔湾区	广州市荔湾区沙面北街45号	113.253	23.1139
1005	广州白云山中一药业有限公司	1959-09-24	2023-06-09	M	73	研究和试验发展	广东省	广州市	黄埔区	广州市黄埔区云埔一路32号	113.55	23.1516
1006	广州百花香料股份有限公司	1993-10-12	2021-04-15	C	26	化学原料和化学制品制造业	广东省	广州市	荔湾区	广州市荔湾区东漖北路560号（南楼）911室	113.235	23.0955
1007	广州百乐食品科技发展有限公司	1988-08-11	2019-11-26	C	14	食品制造业	广东省	广州市	黄埔区	广州经济技术开发区永和经济区新业路46号21栋4楼	113.614	23.1259
1008	广州柏涵琦农业科技有限公司	2008-07-25	2020-09-03	C	13	农副食品加工业	广东省	广州市	南沙区	广州市南沙区榄核镇万安村工业区1楼102室（仅限办公用途）	113.352	22.8816
1009	广州邦讯信息系统有限公司	2003-09-17	2023-08-23	M	73	研究和试验发展	广东省	广州市	天河区	广州市天河区天河软件园高普路1029、31号4层	113.419	23.1783
1010	广州宝力特液压技术有限公司（曾用名：广州宝力特液压密封有限公司）	2000-01-24	2023-07-19	C	34	通用设备制造业	广东省	广州市	黄埔区	广州市经济技术开发区永和经济区田园路97号	113.563	23.1932
1011	广州保赐利化工有限公司	2000-08-30	2022-05-10	C	26	化学原料和化学制品制造业	广东省	广州市	从化区	广东从化经济开发区太源路11号	113.502	23.4491
1012	广州保得威尔电子科技股份有限公司	2006-05-25	2022-08-05	M	73	研究和试验发展	广东省	广州市	黄埔区	广州市黄埔区开源大道11号C2栋201室	113.502	23.1594
1013	广州北羊信息技术有限公司	1998-04-16	2022-03-24	G	53	铁路运输业	广东省	广州市	越秀区	广州市越秀区白云路2号首层	113.288	23.1229
1014	广州标旗光电科技发展股份有限公司（曾用名：广州标旗电子科技有限公司）	2005-04-05	2023-09-04	C	40	仪器仪表制造业	广东省	广州市	黄埔区	广州市黄埔区彩频路7号701-1房	113.441	23.1694
1015	广州博冠智能科技有限公司（曾用名：广州博冠光电技术有限公司）	2007-06-05	2022-08-25	M	73	研究和试验发展	广东省	广州市	黄埔区	广州高新技术产业开发区科学城开源大道11号A5栋二层	113.442	23.166
1016	广州博冠信息科技有限公司	2003-12-08	2023-11-09	I	65	软件和信息技术服务业	广东省	广州市	天河区	广州市天河区科韵路16号自编第5栋801、901（仅限办公用途，不可作厂房）	113.378	23.1314
1017	广州博济新药临床研究中心有限公司	2003-10-10	2019-06-10	M	73	研究和试验发展	广东省	广州市	增城区	广州市增城区永宁街创立路3号（增城经济技术开发区核心区内）	113.628	23.1837
1018	博济医药科技股份有限公司（曾用名：广州博济医药生物技术股份有限公司）	2002-09-29	2023-06-06	M	73	研究和试验发展	广东省	广州市	黄埔区	广州黄埔区科学城南翔一路62号（二、三、四、五）栋	113.46	23.1626
1019	广州博控自动化技术有限公司	2003-03-24	2021-12-03	M	74	专业技术服务业	广东省	广州市	天河区	广州市天河区建工路12号302房	113.378	23.1288
1020	广州博颖达汽车零部件有限公司	2010-02-24	2015-09-11	C	36	汽车制造业	广东省	广州市	增城区	广州市增城新塘镇瑶田村西联社庙岭工业区（临时经营场所使用证明有效期至2018年5月17日）	113.632	23.1425
1021	广州彩创网络技术有限公司	2009-07-01	2023-09-04	M	73	研究和试验发展	广东省	广州市	天河区	广州市天河区科华街1号301至353室自编E3号（仅限办公）	113.365	23.1517
1022	广州灿点信息科技有限公司	2010-11-24	2021-06-28	I	65	软件和信息技术服务业	广东省	广州市	天河区	广州市天河区东郊工业园路建工路8号3楼自编C141号（仅限办公）	113.379	23.1299
1023	呈和科技股份有限公司（曾用名：广州呈和科技有限公司）	2002-01-31	2023-10-09	C	26	化学原料和化学制品制造业	广东省	广州市	白云区	广州市白云区北太路1633号广州民营科技园科强路2号	113.341	23.3015
1024	广州城市信息研究所有限公司	1999-03-08	2022-02-24	M	73	研究和试验发展	广东省	广州市	天河区	广州市天河区建中路64、66号东三层	113.377	23.1287
1025	广州创研智能科技有限公司（曾用名：广州创研自动化设备有限公司）	2011-04-02	2021-02-22	M	73	研究和试验发展	广东省	广州市	黄埔区	广州市黄埔区科丰路31号G1栋101房（仅限办公）	113.466	23.1551
1026	广州春光新能源科技发展有限公司	1999-06-07	2023-11-07	M	73	研究和试验发展	广东省	广州市	增城区	广州市增城区新塘镇塘西路15号之一2幢	113.844	23.22
1027	广州达安临床检验中心有限公司	2006-02-28	2022-11-11	M	73	研究和试验发展	广东省	广州市	黄埔区	广州市高新技术产业开发区荔枝山路6号	113.444	23.1852
1028	广州达意隆包装机械股份有限公司	1998-12-18	2023-06-12	C	35	专用设备制造业	广东省	广州市	黄埔区	广州市黄埔区云埔一路23号	113.55	23.1516
1029	广州大峰精密工业有限公司	2005-07-24	2021-12-07	C	34	通用设备制造业	广东省	广州市	南沙区	广州市南沙区大岗镇新鸿街45号（厂房，办公楼）	113.45	22.8265
1030	广州大凌实业有限公司（曾用名：广州大凌实业股份有限公司）	1992-09-22	2023-05-05	C	39	计算机、通信和其他电子设备制造业	广东省	广州市	黄埔区	广州市黄埔区黄陂龙朱路1号之一1栋315房	113.441	23.1969
1031	广州丹奇研究中心有限公司（曾用名：广州丹奇日用化工厂有限公司）	2000-01-06	2023-05-22	M	73	研究和试验发展	广东省	广州市	天河区	广州市天河区沙太南路85号2楼205-65房	113.333	23.1758
1032	创造者社区（广州）有限公司（曾用名：广州德浩科视电子科技有限公司）	2009-07-28	2023-02-21	M	75	科技推广和应用服务业	广东省	广州市	黄埔区	广州市高新技术产业开发区瑞泰路2号	113.515	23.1581
1033	广州德米医用设备有限公司	2011-08-16	2023-03-16	C	35	专用设备制造业	广东省	广州市	番禺区	广州市番禺区沙湾镇大巷涌路131号	113.347	22.9026
1034	广州德硕电子科技有限公司	2007-04-29	2021-04-06	M	73	研究和试验发展	广东省	广州市	天河区	广州市天河区棠德南路28号之一507房	113.388	23.1379
1035	广州迪森热能技术股份有限公司	1996-07-16	2023-09-04	D	44	电力、热力生产和供应业	广东省	广州市	黄埔区	广州市经济技术开发区东区东众路42号	113.511	23.1454
1036	广州地铁设计研究院股份有限公司（曾用名：广州地铁设计研究院有限公司）	1993-08-06	2022-07-05	M	74	专业技术服务业	广东省	广州市	越秀区	广州市越秀区环市西路204号	113.266	23.1513
1037	广州帝隆科技股份有限公司（曾用名：广州帝隆计算机科技有限公司）	2006-03-01	2020-10-21	I	65	软件和信息技术服务业	广东省	广州市	越秀区	广州市越秀区东风中路515号201房（部位：自编号：201单元）	113.278	23.1381
1038	广州电力机车有限公司	2011-03-01	2019-08-28	C	37	铁路、船舶、航空航天和其他运输设备制造业	广东省	广州市	花都区	广州市花都区狮岭镇山前旅游大道西18号	113.125	23.4758
1039	广州电子口岸管理有限公司	2005-02-08	2023-09-21	I	65	软件和信息技术服务业	广东省	广州市	黄埔区	广州市黄埔区黄埔大道东983号501-532房	113.476	23.1017
1040	广州东奥电气有限公司	2006-08-22	2022-09-20	C	38	电气机械和器材制造业	广东省	广州市	荔湾区	广州市荔湾区荷景南路17号A厂房四层B-C轴	113.255	23.06
1041	东科延锋（广州）座椅系统有限公司（曾用名：广州东风江森座椅有限公司）	2005-01-06	2023-05-08	C	36	汽车制造业	广东省	广州市	花都区	广州市花都区秀全街金钟大道1号	113.17	23.4418
1042	广州东芝白云电器设备有限公司	2002-02-26	2023-02-27	C	38	电气机械和器材制造业	广东省	广州市	白云区	广州市白云区江高镇神山工业区大岭南路18号	113.209	23.3414
1043	广州东芝白云菱机电力电子有限公司	2004-02-12	2023-05-31	C	38	电气机械和器材制造业	广东省	广州市	白云区	广州市白云区江高镇神山管理区大岭南路18号	113.209	23.3414
1044	广州多益网络股份有限公司（曾用名：广州多益网络科技有限公司）	2006-07-14	2021-09-28	M	73	研究和试验发展	广东省	广州市	黄埔区	广州市萝岗区伴河路90号自编一栋301房	113.518	23.1588
1045	广州番禺巨大汽车音响设备有限公司	1999-02-04	2020-06-02	C	39	计算机、通信和其他电子设备制造业	广东省	广州市	番禺区	广州市番禺区大石街石北工业路684号11栋328号	113.292	23.0203
1046	广州弘高科技股份有限公司（曾用名：广州番禺运升电路版有限公司）	1992-01-16	2023-06-06	C	39	计算机、通信和其他电子设备制造业	广东省	广州市	南沙区	广州市南沙区大岗镇潭洲工业东区	113.396	22.7847
1047	广州飞达音响有限公司（曾用名：广州飞达音响专业器材有限公司）	1994-06-22	2023-09-28	C	39	计算机、通信和其他电子设备制造业	广东省	广州市	花都区	广州市花都区炭步飞达工业园	113.125	23.3609
1048	广州菲动软件科技有限公司	2012-06-13	2021-02-19	I	65	软件和信息技术服务业	广东省	广州市	天河区	广州市天河区高普路1021号5楼5910号（仅限办公）	113.419	23.1792
1049	广州丰江电池新技术股份有限公司	2006-09-25	2022-06-30	C	38	电气机械和器材制造业	广东省	广州市	南沙区	广州市南沙区东涌镇细沥村（厂房二)(厂房三）	113.459	22.8401
1050	广州丰江微电子有限公司	2000-09-30	2023-08-31	C	39	计算机、通信和其他电子设备制造业	广东省	广州市	南沙区	广州市南沙区东涌镇太石工业区万泰路50号	113.41	22.8948
1051	广州烽火众智数字技术有限公司	2012-12-18	2022-07-21	M	73	研究和试验发展	广东省	广州市	黄埔区	广州高新技术产业开发区揽月路101号A座3层	113.465	23.1725
1052	广州奥特信息科技股份有限公司（曾用名：广州复旦奥特科技股份有限公司）	1993-02-17	2022-08-10	I	65	软件和信息技术服务业	广东省	广州市	黄埔区	广州市黄埔区科学大道52号201,202,203,204	113.437	23.1705
1053	广州高澜节能技术股份有限公司	2001-06-29	2023-06-16	M	73	研究和试验发展	广东省	广州市	黄埔区	广州市高新技术产业开发区科学城南云五路3号	113.459	23.1481
1054	广州高浪电子科技有限公司	2003-05-21	2019-09-11	C	39	计算机、通信和其他电子设备制造业	广东省	广州市	花都区	广州市花都区三东大道铁山河路美东工业园18-36栋	113.261	23.4233
1055	广州高通影像技术有限公司	2006-08-31	2023-07-17	M	74	专业技术服务业	广东省	广州市	越秀区	广州市越秀区天河路33号大院24号首层	113.346	23.1419
1056	广州广船国际股份有限公司	1994-10-21	2023-11-06	C	37	铁路、船舶、航空航天和其他运输设备制造业	广东省	广州市	海珠区	广州市海珠区革新路137号船舶大厦自编十五楼全层	113.261	23.0958
1057	广电运通集团股份有限公司（曾用名：广州广电运通金融电子股份有限公司）	1999-07-08	2023-11-03	J	69	其他金融业	广东省	广州市	黄埔区	广州市高新技术产业开发区科学城科林路9、11号	113.442	23.166
1058	广州广哈通信股份有限公司	1995-04-08	2023-07-06	C	39	计算机、通信和其他电子设备制造业	广东省	广州市	黄埔区	广州市高新技术产业开发区科学城南云一路16号	113.45	23.1569
1059	广州广日电气设备有限公司	1998-10-30	2023-10-10	C	38	电气机械和器材制造业	广东省	广州市	番禺区	广州市番禺区石楼镇国贸大道南636号之五	113.481	22.987
1060	广州广日电梯工业有限公司	1982-06-23	2023-10-27	C	43	金属制品、机械和设备修理业	广东省	广州市	番禺区	广州市番禺区石楼镇国贸大道南636号	113.481	22.987
1061	广州广软信息技术服务有限公司	1993-06-01	2023-10-10	I	65	软件和信息技术服务业	广东省	广州市	黄埔区	广州市黄埔区光谱西路69号创意中心205房，创意中心206房	113.44	23.168
1062	广州广有通信设备有限公司	2002-12-30	2023-01-11	C	39	计算机、通信和其他电子设备制造业	广东省	广州市	海珠区	广州市海珠区敦和路173号	113.324	23.0948
1063	硅能光电半导体（广州）有限公司（曾用名：广州硅能照明有限公司）	2010-08-04	2023-03-16	C	38	电气机械和器材制造业	广东省	广州市	黄埔区	广州市黄埔区开源大道11号A2栋101室、A4栋201室	113.502	23.1594
1064	广州国联通信有限公司	1998-09-23	2020-05-27	M	73	研究和试验发展	广东省	广州市	黄埔区	广州高新技术产业开发区科学城彩频路7号之一401	113.442	23.166
1065	广州国游网络科技股份有限公司（曾用名：广州国游文化传播有限公司）	2007-11-22	2017-06-19	M	73	研究和试验发展	广东省	广州市	天河区	广州市天河区珠江西路15号1701/1708	113.329	23.13
1066	广州海孚互联网科技有限公司（曾用名：广州海孚教育科技有限公司）	2010-05-04	2019-10-25	I	65	软件和信息技术服务业	广东省	广州市	天河区	广州市天河区中山大道建工路13、15号538房（仅限办公用途）	113.379	23.1288
1067	广州海格通信集团股份有限公司	2000-07-20	2022-12-20	M	73	研究和试验发展	广东省	广州市	黄埔区	广州市高新技术产业开发区科学城海云路88号	113.454	23.1494
1068	广州海鸥住宅工业股份有限公司（曾用名：广州海鸥卫浴用品股份有限公司）	1998-01-08	2023-11-13	C	33	金属制品业	广东省	广州市	番禺区	广州市番禺区沙头街禺山西路363号	113.339	22.9415
1069	广州海维空间信息系统技术有限公司	2002-07-03	2014-05-19	I	65	软件和信息技术服务业	广东省	广州市	天河区	广州市天河区龙口东路342-360号天诚广场裙楼3层301-302号	113.347	23.148
1070	广州海洋汽车零部件有限公司	2010-05-24	2017-05-04	C	36	汽车制造业	广东省	广州市	花都区	广州市花都区新华街花港大道15号1号厂房首二层	113.168	23.3795
1071	广州韩亚生物科技有限公司	2011-07-15	2023-01-05	M	73	研究和试验发展	广东省	广州市	黄埔区	广州市高新技术产业开发区科学城神舟路883号（厂房主楼）自编1楼	113.452	23.1903
1072	广州汉光电气股份有限公司（曾用名：广州汉光电气有限公司）	2005-09-08	2023-09-27	C	40	仪器仪表制造业	广东省	广州市	荔湾区	广州市荔湾区芳村大道东200号68栋	113.25	23.1018
1073	瀚阳国际工程咨询有限公司（曾用名：广州瀚阳工程咨询有限公司）	2005-11-22	2023-10-16	M	74	专业技术服务业	广东省	广州市	天河区	广州市天河区思成路23号宏太智慧谷七号楼2楼自编239A房	113.423	23.18
1074	广州航天海特系统工程有限公司	1997-05-13	2021-12-27	E	48	土木工程建筑业	广东省	广州市	天河区	广州市天河区天慧路3号广州互联网产业园B501	113.423	23.1827
1075	广州航新电子有限公司	1997-08-08	2021-06-01	C	40	仪器仪表制造业	广东省	广州市	黄埔区	广州市经济技术开发区科学城光宝路1号	113.426	23.1655
1076	广州航新航空科技股份有限公司	2005-11-23	2023-06-29	C	37	铁路、船舶、航空航天和其他运输设备制造业	广东省	广州市	黄埔区	广州市经济技术开发区科学城光宝路1号	113.426	23.1655
1077	广州豪进摩托车股份有限公司	2001-04-26	2020-03-18	C	37	铁路、船舶、航空航天和其他运输设备制造业	广东省	广州市	增城区	广州市增城新塘镇荔新公路上邵工业区[土名：增城市新塘镇上邵村第四社企岗（厂房A2）]	113.644	23.1626
1078	广州皓竹软件有限公司	2006-10-24	2022-10-27	I	65	软件和信息技术服务业	广东省	广州市	天河区	广州市天河区天河北路559号2302自编B15（仅限办公）	113.342	23.1475
1079	广州合诚三先生物科技有限公司	2001-09-23	2022-11-29	M	73	研究和试验发展	广东省	广州市	黄埔区	广州市萝岗区云埔工业区云诚路8号之一	113.535	23.1538

## Sheet: 2015-2017
Number	Company Name	Date of Establishment	Date of Approval	Industry Code (Category)	Industry Code (Major Category)	Industry Sector	Province	City	District	Address	Longitude	Latitude
1	广东安普宏商电气有限公司	2013-08-07	2018-10-17	M	74	专业技术服务业	广东省	广州市	花都区	广州市花都区炭步镇车城大道自编13号之8001房	113.146	23.3712
2	广东奥飞数据科技股份有限公司	2004-09-28	2023-10-12	M	73	研究和试验发展	广东省	广州市	南沙区	广州市南沙区南沙街进港大道8号1508房	113.554	22.807
3	广东港鑫科技有限公司	2000-05-25	2022-06-23	M	73	研究和试验发展	广东省	广州市	越秀区	广东省广州市越秀区广州大道中307号富力新天地中心1508室	113.321	23.1328
4	广东好太太科技集团股份有限公司（曾用名：广东好太太科技集团有限公司）	2005-01-05	2024-01-30	I	64	互联网和相关服务	广东省	广州市	番禺区	广州市番禺区化龙镇石化路21号之一、之二	113.457	22.9985
5	广东宏大民爆集团有限公司（曾用名：广东宏大增化民爆有限责任公司）	2007-12-11	2023-02-17	C	26	化学原料和化学制品制造业	广东省	广州市	增城区	广州市增城增江街联益村光大路28号	113.873	23.3304
6	广东赛翼智能科技有限公司	2013-05-09	2020-07-15	M	73	研究和试验发展	广东省	广州市	天河区	广州市天河区高普路138号西座三层301、302、303、304、305、306、307、308、309单元	113.416	23.1773
7	广东省基础工程集团有限公司	1980-12-29	2024-03-12	E	48	土木工程建筑业	广东省	广州市	天河区	广州市黄埔区黄埔大道东980号港航中心二期A塔25层2505	113.441	23.1024
8	广东省建筑设计研究院	-	-	M	74	专业技术服务业	广东省	广州市	荔湾区	广州市荔湾区流花路97号	113.259	23.1456
9	广东为民电子科技有限公司	2011-01-27	2020-01-13	M	73	研究和试验发展	广东省	广州市	番禺区	广州市越秀区新南路11号之一703房	113.301	23.1317
10	广东唯康教育科技股份有限公司	2012-05-14	2022-10-18	M	74	专业技术服务业	广东省	广州市	黄埔区	广州市高新技术产业开发区开泰大道36号（1）栋308房	113.304	23.1477
11	广东先朗照明有限公司	1995-11-13	2024-03-14	C	38	电气机械和器材制造业	广东省	广州市	白云区	广东省广州市白云区江高镇鹤云路11号	113.221	23.2731
12	广州爱伯馨香料有限公司	2002-08-26	2023-09-22	M	73	研究和试验发展	广东省	广州市	黄埔区	广州经济技术开发区东江大道191号	113.539	23.0646
13	广州傲农生物科技有限公司	2011-06-07	2024-02-02	M	73	研究和试验发展	广东省	广州市	增城区	广州市增城朱村街南岗村（缸瓦冚）路	113.55	23.0995
14	广州彩熠灯光股份有限公司（曾用名：广州彩熠灯光有限公司）	2007-05-16	2023-06-02	C	38	电气机械和器材制造业	广东省	广州市	白云区	广州市白云区广州民营科技园科泰一路46号	113.305	23.3017
15	广州创特技术有限公司	2000-05-16	2024-02-01	M	74	专业技术服务业	广东省	广州市	越秀区	广州市越秀区东风中路515号2307-2310室	113.283	23.138
16	广州恩次元信息科技有限公司	2012-01-09	2016-08-12	I	65	软件和信息技术服务业	广东省	广州市	黄埔区	广州高新技术产业开发区科学城科珠路203号F1202	113.442	23.1704
17	万力轮胎股份有限公司（曾用名：广州丰力橡胶轮胎有限公司）	2004-12-07	2023-11-16	O	82	其他服务业	广东省	广州市	从化区	广州市从化鳌头镇万力路3号	113.464	23.6203
18	广州福耀玻璃有限公司	2006-06-08	2021-06-08	C	36	汽车制造业	广东省	广州市	增城区	广州市增城市新塘镇荔新公路段	113.808	23.2623
19	广州广高高压电器有限公司	2000-11-07	2021-03-23	C	38	电气机械和器材制造业	广东省	广州市	黄埔区	广州市黄埔区云埔工业区云埔一路15号	113.545	23.1518
20	广州广牧丰生物技术有限公司	2002-11-13	2021-07-15	M	73	研究和试验发展	广东省	广州市	黄埔区	广州市黄埔区敏兴街5号403房（仅限办公）	113.487	23.1875
21	广东海山游乐科技股份有限公司（曾用名：广州海山娱乐科技有限公司）	2002-04-04	2023-11-24	M	73	研究和试验发展	广东省	广州市	从化区	广州市从化区温泉镇石海工业大道12号	113.653	23.5795
22	广州合立正通信息科技有限公司	1999-07-13	2021-01-21	I	65	软件和信息技术服务业	广东省	广州市	番禺区	广州市番禺区小谷围街青蓝街28号5栋602室、603室	113.394	23.0636
23	广州衡创测试技术服务有限公司	2005-07-18	2023-12-27	M	74	专业技术服务业	广东省	广州市	黄埔区	广州经济技术开发区玉树工业园敬业三街11号A栋202房	113.438	23.1622
24	广州汇信特通信技术股份有限公司（曾用名：广州汇信特通信技术有限公司）	2006-05-24	2023-07-24	C	39	计算机、通信和其他电子设备制造业	广东省	广州市	黄埔区	广州市萝岗区玉树工业园敬业四街H栋602房	113.44	23.1627
25	广州嘉憬母婴科技股份有限公司（曾用名：广州嘉憬家用电器有限公司）	2008-11-04	2023-03-21	L	72	商务服务业	广东省	广州市	番禺区	广州市番禺区钟村街钟盛路185号一、二层	113.306	22.9775
26	广州空港航翼信息科技有限公司	2007-12-24	2024-03-29	I	65	软件和信息技术服务业	广东省	广州市	黄埔区	广州市黄埔区黄埔东路4322号603房	113.56	23.1196
27	联欣科技投资（广州）有限公司（曾用名：广州联欣自动识别技术有限公司）	2002-04-05	2021-12-22	M	73	研究和试验发展	广东省	广州市	黄埔区	广州高新技术产业开发区科学大道绿地智慧广场C2栋902	113.437	23.1699
28	广州灵动创想文化科技有限公司	2009-09-15	2023-12-27	M	74	专业技术服务业	广东省	广州市	番禺区	广州市番禺区钟村街汉溪大道东290号保利大都汇3栋办公楼601房	113.341	23.0009
29	广州中滔绿由环保科技有限公司（曾用名：广州绿由工业弃置废物回收处理有限公司）	2000-11-29	2021-12-16	M	73	研究和试验发展	广东省	广州市	南沙区	广州市南沙区横沥镇合兴路56号（横沥所）	113.508	22.7528
30	广州美美医疗科技有限公司	2009-07-26	2024-01-22	M	73	研究和试验发展	广东省	广州市	白云区	广州市天河区沐陂东路5号12栋201房	113.409	23.1609
31	广州敏惠汽车零部件有限公司	2001-02-21	2023-10-31	C	36	汽车制造业	广东省	广州市	黄埔区	广州经济技术开发区永和经济区永顺大道西4号	113.554	23.206
32	广东驱动力生物科技集团股份有限公司（曾用名：广州驱动力饲料有限公司）	2012-05-21	2022-07-13	M	73	研究和试验发展	广东省	广州市	白云区	广州市白云区广从十路登塘工业区9号之四厂	113.481	23.4238
33	广州塞维拉电梯轨道系统有限公司	1993-01-26	2023-08-02	C	33	金属制品业	广东省	广州市	番禺区	广州市番禺区石楼镇国贸大道南636号之二	113.481	22.987
34	广州市爱浦电子科技有限公司	2004-07-22	2020-05-13	C	39	计算机、通信和其他电子设备制造业	广东省	广州市	黄埔区	广州市黄埔区埔南路63号四号楼302房	113.557	23.1354
35	广州市鼎安交通科技股份有限公司（曾用名：广州市鼎安交通科技有限公司）	2000-06-21	2023-12-04	M	73	研究和试验发展	广东省	广州市	白云区	广州市白云区北太路1633号广州民营科技园云安路7号自编1栋3楼	113.341	23.3015
36	广州市光机电技术研究院	-	-	M	73	研究和试验发展	广东省	广州市	黄埔区	广州高新技术产业开发区科学城科研路3号	113.447	23.176
37	广州市华冠精冲零件有限公司	2000-09-21	2020-12-03	C	34	通用设备制造业	广东省	广州市	增城区	广州市增城区永宁街新建北路39号（增城经济技术开发区核心区内）	113.646	23.1818
38	广州市家庭医生在线信息有限公司	2008-08-05	2024-02-26	I	65	软件和信息技术服务业	广东省	广州市	越秀区	广州市越秀区先烈中路80号802、808、809房	113.302	23.1426
39	广州市红棉智汇科创股份有限公司（曾用名：广州市浪奇实业股份有限公司）	1978-06-20	2023-12-11	C	26	化学原料和化学制品制造业	广东省	广州市	天河区	广州市天河区黄埔大道中锦明街87-93号	113.375	23.1297
40	广州市欧巴码智能科技有限公司	2011-11-11	2022-01-25	M	73	研究和试验发展	广东省	广州市	增城区	广州市增城区新塘镇民营西二路7号之一	113.636	23.1519
41	广州市泰富信通科技有限公司	2003-03-04	2023-12-19	I	65	软件和信息技术服务业	广东省	广州市	天河区	广州市天河区林和西路167号威尼国际大厦2941-2942房	113.329	23.1566
42	广州市万隆证券咨询顾问有限公司	1993-02-26	2023-06-07	J	67	资本市场服务	广东省	广州市	越秀区	广州市越秀区中山一路21号天兴大厦东塔20楼	113.318	23.1349
43	广州市昕恒泵业制造有限公司	2009-02-26	2023-12-27	C	34	通用设备制造业	广东省	广州市	黄埔区	广州市经济技术开发区云开路5号	113.539	23.1601
44	广州市兴世机械制造有限公司	1999-10-27	2021-08-12	C	35	专用设备制造业	广东省	广州市	番禺区	广州市番禺区钟村街钟汉路11号	113.333	22.9875
45	广州市忆科计算机系统有限公司	2001-05-21	2017-03-02	I	65	软件和信息技术服务业	广东省	广州市	天河区	广州市天河区科韵路16号自编1栋301-A2房	113.378	23.1314
46	中海怡高建设集团股份有限公司（曾用名：广州市中海怡高装饰工程有限公司）	2000-05-08	2023-11-20	E	50	建筑装饰、装修和其他建筑业	广东省	广州市	天河区	广州市天河区天河北路30号中816	113.323	23.1463
47	广东卓纬科技有限公司（曾用名：广州首龙通讯科技有限公司）	2011-07-25	2024-01-05	M	73	研究和试验发展	广东省	广州市	天河区	广州市天河区中山大道西89号办公楼（部位：C栋603-606）（仅限办公用途）	113.363	23.1409
48	广东腾威科技股份有限公司（曾用名：广州腾威科技有限公司）	2008-03-11	2020-07-30	M	73	研究和试验发展	广东省	广州市	增城区	广州市增城区新塘镇永和誉山国际融景一路10号501房（仅限办公用途）	113.613	23.1937
49	广州通导信息技术服务有限公司	2013-07-22	2023-02-23	I	65	软件和信息技术服务业	广东省	广州市	黄埔区	广州高新技术产业开发区南翔三路8号九层	113.45	23.1545
50	广州万正药业有限公司	2004-04-01	2016-11-22	C	27	医药制造业	广东省	广州市	黄埔区	广州高新技术产业开发区广州科学城芳草甸路2号	113.449	23.1876
51	广州西麦科技股份有限公司（曾用名：广州西麦信息科技有限公司）	2003-08-28	2022-12-07	M	73	研究和试验发展	广东省	广州市	黄埔区	广州市高新技术产业开发区科丰路31号自编二栋华南新材料创新园G5栋203	113.464	23.1546
52	广州阳光耐特电子有限公司	2000-10-01	2022-11-16	C	39	计算机、通信和其他电子设备制造业	广东省	广州市	越秀区	广州市越秀区环市东路418号21楼自编2101、2102房（仅限办公）	113.301	23.1407
53	广州银汉科技有限公司	2001-11-15	2024-03-01	I	64	互联网和相关服务	广东省	广州市	天河区	广州市天河区黄埔大道中666号701房（仅限办公）	113.357	23.1304
54	广州永大不锈钢有限公司	1994-07-04	2024-02-01	C	33	金属制品业	广东省	广州市	花都区	广州市花都区花山镇小布村	113.27	23.4183
55	广州优维电子科技有限公司	2010-06-02	2019-09-16	M	73	研究和试验发展	广东省	广州市	黄埔区	广州市黄埔区香山路17号厂房B栋603房	113.446	23.1856
56	广州中海达卫星导航技术股份有限公司	2006-06-21	2023-11-08	C	40	仪器仪表制造业	广东省	广州市	番禺区	广州市番禺区东环街番禺大道北555号天安总部中心13号厂房101	113.38	22.987
57	沃特威（广州）电子科技有限公司	2004-08-15	2021-06-09	C	39	计算机、通信和其他电子设备制造业	广东省	广州市	黄埔区	广州高新技术产业开发区科学城南云二路56号	113.453	23.1535
58	扬子江药业集团广州海瑞药业有限公司	2004-04-19	2021-08-18	C	27	医药制造业	广东省	广州市	黄埔区	广州高新技术产业开发区广州科学城香山路31号	113.455	23.1878
59	中交第四航务工程勘察设计院有限公司	1993-08-25	2023-12-19	E	50	建筑装饰、装修和其他建筑业	广东省	广州市	海珠区	广州市海珠区前进路161号	113.288	23.1062
60	广州安凯微电子股份有限公司（曾用名：安凯（广州）微电子技术有限公司）	2001-04-10	2023-10-30	I	65	软件和信息技术服务业	广东省	广州市	黄埔区	广州市黄埔区博文路107号	113.487	23.1875
61	奥普镀膜技术（广州）有限公司	2003-01-06	2022-08-02	C	39	计算机、通信和其他电子设备制造业	广东省	广州市	黄埔区	广州经济技术开发区蓝玉四街九号5号厂房1楼	113.533	23.0642
62	澳华达香精（广州）有限公司（曾用名：澳华达香料科技（广州）有限公司）	2007-11-30	2022-08-23	C	26	化学原料和化学制品制造业	广东省	广州市	黄埔区	广州市萝岗区云埔工业区云埔一路22号	113.547	23.1514
63	霸王（广州）有限公司	2005-04-13	2023-07-05	M	73	研究和试验发展	广东省	广州市	南沙区	广州市南沙区丰泽东路106号（自编1号楼）13层1301房自编X1301-A767号（仅限办公用途）（JM）	113.538	22.7953
64	波达通信设备（广州）有限公司	2004-01-02	2021-12-08	C	39	计算机、通信和其他电子设备制造业	广东省	广州市	黄埔区	广州市黄埔区滨河路9号1501室1601室2301室	113.528	23.073
65	电讯盈科信息技术（广州）有限公司	2001-05-28	2023-09-27	I	65	软件和信息技术服务业	广东省	广州市	黄埔区	广州经济技术开发区志诚大道融汇大厦14楼1408、1409室	113.532	23.067
66	丰铁塑机（广州）有限公司	2002-10-30	2022-09-05	C	35	专用设备制造业	广东省	广州市	花都区	广州市花都区新雅街华兴工业区	113.242	23.3528
67	港日电梯有限公司	2002-09-18	-	C	34	通用设备制造业	广东省	广州市	番禺区	广州市番禺区东环街番禺大道北555号天安总部中心1号楼1801号	113.377	22.9853
68	圣戈班伟伯（广州）建材有限公司（曾用名：高迪新型建材（广州）有限公司）	2009-08-24	2022-10-14	C	30	非金属矿物制品业	广东省	广州市	增城区	广州市增城区增江街经三路10号（厂房、办公楼）	113.858	23.2768
69	广东诚泰交通科技发展有限公司	2006-04-24	2023-12-27	E	49	建筑安装业	广东省	广州市	白云区	广州市白云区广从一路338号二楼	113.326	23.2631
70	广东创明遮阳科技有限公司	2006-05-15	2023-04-07	M	73	研究和试验发展	广东省	广州市	黄埔区	广州市萝岗区科学城科学大道科汇发展中心科汇二街4号401室（仅限办公）	113.442	23.1732
71	广东道一信息技术股份有限公司	2004-03-08	2022-07-12	I	65	软件和信息技术服务业	广东省	广州市	天河区	广州市天河区员村一横路7号大院1号自编之首层南部、4、8层单元	113.362	23.1259
72	广东德士嘉通讯系统有限公司	2005-06-10	2021-03-19	I	65	软件和信息技术服务业	广东省	广州市	番禺区	广州市番禺区东环街迎宾路730号广州市番禺节能科技园内天安科技创新大厦516房	113.373	22.9848
73	广东地球村计算机系统股份有限公司	1999-10-20	2024-01-12	I	65	软件和信息技术服务业	广东省	广州市	天河区	广州市天河区高新技术产业开发区首期工业园建中路62号第二层203室	113.378	23.1291
74	广东东方思维科技有限公司	2000-08-14	2023-12-27	I	65	软件和信息技术服务业	广东省	广州市	越秀区	广东省广州市越秀区白云路83号广东省高速公路大厦17楼、22楼	113.29	23.1256
75	广东方纬科技有限公司	2003-02-11	2023-08-30	M	73	研究和试验发展	广东省	广州市	海珠区	广州市海珠区新港西路135号大院中大蒲园区628栋中大科技园楼A座自编号411B房（仅限办公用途使用）	113.298	23.0992
76	广东非思智能科技股份有限公司	2012-02-02	2023-10-26	M	73	研究和试验发展	广东省	广州市	黄埔区	广州市黄埔区（中新广州知识城）亿创街1号604房部位：3	113.555	23.3308
77	广东风华芯电科技股份有限公司	2000-10-20	2024-02-06	C	39	计算机、通信和其他电子设备制造业	广东省	广州市	黄埔区	广州市萝岗区科学城南翔二路10号	113.448	23.1605
78	广东福能达环保科技有限公司	2011-08-08	2021-02-10	M	73	研究和试验发展	广东省	广州市	番禺区	广州市番禺区石基镇市莲路石基路段82号（3号厂房）	113.432	22.9053
79	广东公诚设备资产服务有限公司	2000-03-01	2023-01-16	E	49	建筑安装业	广东省	广州市	天河区	广东省广州市天河区中山大道华景路一号南方通信大厦20-21层	113.364	23.1409
80	广东共享信息技术有限公司	2003-08-06	2019-09-01	M	73	研究和试验发展	广东省	广州市	天河区	广东省广州市天河区龙口西路100号六楼	113.343	23.1432
81	广东冠粤路桥有限公司	1997-05-27	2023-09-25	B	11	开采专业及辅助性活动	广东省	广州市	番禺区	广州市番禺区大龙街东环路106号502	113.392	22.9538
82	广东广凌信息科技股份有限公司（曾用名：广东广凌计算机科技股份有限公司）	1998-04-15	2023-12-15	I	65	软件和信息技术服务业	广东省	广州市	天河区	广州市天河区五山路248号2702房自编01、02	113.353	23.1497
83	广东国笔科技股份有限公司	1998-06-19	2018-05-02	M	73	研究和试验发展	广东省	广州市	番禺区	广州市番禺区小谷围街外环西路100号广东工业大学理学馆422房	113.406	23.0413
84	广东哈工科技发展有限公司（曾用名：广东哈工大首创科技发展有限公司）	2002-12-30	2024-02-07	M	73	研究和试验发展	广东省	广州市	天河区	广州市天河区珠江新城临江大道西33号碧海湾B座506	113.326	23.1204
85	广东汉佳信息技术有限公司	2000-06-30	2020-10-15	I	65	软件和信息技术服务业	广东省	广州市	天河区	广州市天河区灵山东路3号201室（部位：3、4、7）	113.431	23.1343
86	广东合晟网络科技有限公司	2003-09-15	2021-05-14	M	73	研究和试验发展	广东省	广州市	天河区	广州市天河区天河北路侨林街43号1801、1802、1806房（仅限办公用途）	113.336	23.1492
87	恒峰信息技术有限公司（曾用名：广东恒峰信息技术有限公司）	2003-01-14	2023-01-17	M	73	研究和试验发展	广东省	广州市	黄埔区	广州市黄埔区中新广州知识城亿创街1号406房之133	113.555	23.3308
88	广东宏康实业股份有限公司	2005-02-28	2017-11-27	C	34	通用设备制造业	广东省	广州市	番禺区	广州市番禺区大石街南大公路鸿图工业园A1幢3楼	113.323	23.0205
89	广东金泽润技术有限公司（曾用名：广东互维科技有限公司）	2001-06-22	2021-03-23	M	73	研究和试验发展	广东省	广州市	黄埔区	广州市黄埔区科学大道162号B2栋1003房	113.457	23.17
90	广东省华瑞建设发展有限公司（曾用名：广东华恒建设工程有限公司）	2003-05-14	2024-01-25	E	47	房屋建筑业	广东省	广州市	天河区	广东省广州市天河区海安路13号之一财富世纪广场2502室	113.347	23.1304
91	广东华际友天信息科技有限公司	2002-04-15	2023-04-21	I	65	软件和信息技术服务业	广东省	广州市	天河区	广州市天河区高普路136号第四层411、412房（仅限办公）	113.417	23.178
92	广东华仝九方科技有限公司	2001-01-18	2024-01-17	I	65	软件和信息技术服务业	广东省	广州市	荔湾区	广州市荔湾区光复北路508号2027房	113.259	23.1287
93	广东暨通信息发展有限公司	2002-05-31	2024-01-10	I	65	软件和信息技术服务业	广东省	广州市	天河区	广州市天河区平云路 163 号之 601 室、602 室	113.359	23.1254
94	广东金冠科技股份有限公司	2000-05-12	2021-11-12	C	39	计算机、通信和其他电子设备制造业	广东省	广州市	黄埔区	广州市黄埔区南岗云埔工业区骏丰路111号	113.561	23.1005
95	广东金鉴实验室科技有限公司（曾用名：广东金鉴检测科技有限公司）	2012-12-14	2023-09-27	M	73	研究和试验发展	广东省	广州市	增城区	广州市增城区永宁街香山大道2号（开发区管委会办公大楼102室）	113.636	23.161
96	广东精创机械制造有限公司	2006-04-29	2006-08-29	C	34	通用设备制造业	广东省	广州市	番禺区	广州市番禺区石楼镇砺江路11号	113.495	22.9823
97	广东久其软件有限公司	2001-11-26	2019-09-01	I	65	软件和信息技术服务业	广东省	广州市	天河区	广州市天河区员村二横路1号1006室	113.368	23.1286
98	广东康得新窗膜有限公司	2013-06-27	2024-03-15	M	73	研究和试验发展	广东省	广州市	白云区	广州市白云区鹤龙街鹤龙一路88号汇龙信息产业科技园C区第五层C503、C503a号（自主申报）	113.279	23.2241
99	广东科立恩环保科技有限公司	2010-12-06	2024-03-11	M	73	研究和试验发展	广东省	广州市	黄埔区	广州市高新技术产业开发区科学城科研路18号四楼401房	113.449	23.1769
100	广东科诺勘测工程有限公司	2000-06-16	2020-09-04	E	48	土木工程建筑业	广东省	广州市	黄埔区	广州市黄埔区天丰路1号3栋201房，3栋301房（仅限办公）	113.465	23.166
101	广东蓝盾乐庚信息技术有限公司	2012-12-19	2023-03-16	I	65	软件和信息技术服务业	广东省	广州市	黄埔区	广州市黄埔区黄埔公园西路166号7层707单元B02(仅限办公)	113.458	23.1024
102	广东蓝谷环境科技有限公司	2004-02-28	2022-07-18	M	73	研究和试验发展	广东省	广州市	黄埔区	广州市黄埔区科学城科研路3号A4栋5楼（仅限办公）	113.447	23.176
103	广东蓝图信息技术有限公司	2000-12-05	2023-08-17	I	65	软件和信息技术服务业	广东省	广州市	天河区	广州市天河区建中路62号4楼406号（仅限办公）	113.378	23.1291
104	广东力特工程机械有限公司	1994-12-17	2022-09-14	E	49	建筑安装业	广东省	广州市	黄埔区	广州市黄埔区红荔路4号	113.504	23.0928
105	广东力通网络科技有限公司	1998-04-27	2023-08-03	M	73	研究和试验发展	广东省	广州市	天河区	广州市天河区建中路58号东诚大厦403-406	113.377	23.1297
106	广东励康信息技术有限公司	2002-01-08	2023-11-03	I	65	软件和信息技术服务业	广东省	广州市	天河区	广东省广州市天河区中山大道中路439号18楼26-27房	113.411	23.1283
107	广东联合电子服务股份有限公司	2002-07-15	2021-11-02	C	39	计算机、通信和其他电子设备制造业	广东省	广州市	天河区	广州市天河区体育西路189号15楼	113.328	23.1453
108	广东晾霸智能科技有限公司	2008-09-01	2018-07-24	M	73	研究和试验发展	广东省	广州市	黄埔区	广州市黄埔区环岭路13号	113.544	23.217
109	广东岭南通股份有限公司	2011-08-04	2023-05-16	G	58	多式联运和运输代理业	广东省	广州市	越秀区	广州市越秀区沿江中路298号中区29楼全层	113.285	23.1212
110	广东履安实业有限公司	2001-04-30	2024-04-07	C	35	专用设备制造业	广东省	广州市	天河区	广州市天河区金颖路1号一楼（不可作厂房使用）（仅限办公）	113.354	23.152
111	广东美捷威通生物科技有限公司	2011-12-07	2020-07-15	M	75	科技推广和应用服务业	广东省	广州市	黄埔区	广州市高新技术产业开发区科学城开源大道11号A7栋4层	113.502	23.1594
112	广东铭太信息科技有限公司	2006-09-28	2022-09-15	I	65	软件和信息技术服务业	广东省	广州市	天河区	广州市天河区元岗路310号自编6栋E601、E602、E603单元（仅限办公）	113.347	23.1813
113	广东南方新视界传媒科技有限公司	2011-03-02	2023-10-07	I	65	软件和信息技术服务业	广东省	广州市	越秀区	广州市越秀区广州大道中289号新闻中心B座6层605、606	113.287	23.1453
114	广东庞源工程机械有限公司	2010-03-16	2023-12-21	E	49	建筑安装业	广东省	广州市	花都区	广州市花都区秀全街溪秀路6号之一	113.161	23.3509
115	广东七洲科技股份有限公司（曾用名：广东七洲信息科技有限公司）	2007-12-07	2020-05-18	M	73	研究和试验发展	广东省	广州市	天河区	广州市天河区软件路15号601室	113.42	23.1773
116	广东融讯信息科技有限公司	2008-10-17	2023-12-27	I	65	软件和信息技术服务业	广东省	广州市	天河区	广州市天河区棠基街3号137室	113.389	23.1327
117	广东瑞联科技有限公司	2001-02-19	2022-06-14	I	65	软件和信息技术服务业	广东省	广州市	天河区	广州市天河区五山路371号之一主楼2701-2705/2716单元	113.353	23.1527
118	广东瑞普科技股份有限公司（曾用名：广东瑞普信息科技有限公司）	2004-08-30	2023-06-19	I	65	软件和信息技术服务业	广东省	广州市	天河区	广州市天河区天河路228号之一810房	113.332	23.1378
119	广东睿盟计算机科技有限公司	2002-09-14	2023-03-16	M	73	研究和试验发展	广东省	广州市	天河区	广州市天河区思成路35号1单元801-59室	113.428	23.1836
120	三盟科技股份有限公司（曾用名：广东三盟信息科技有限公司）	2009-12-29	2023-09-07	I	65	软件和信息技术服务业	广东省	广州市	黄埔区	广州市黄埔区黄埔大道东840号3502、3503房	113.476	23.1017
121	广东省保化检测中心有限公司	2005-10-09	2022-06-13	M	73	研究和试验发展	广东省	广州市	黄埔区	广州市黄埔区科学城揽月路80号科技创新基地A区五楼502-509单元、B区五楼501单元、B区三楼301-302单元、C区六楼602-611单元	113.457	23.1662
122	广东省电子商务认证有限公司	2000-08-17	2022-08-23	C	39	计算机、通信和其他电子设备制造业	广东省	广州市	越秀区	广州市越秀区建设五马路1号德安大厦三楼	113.291	23.1398
123	广东省航运规划设计院有限公司	1994-04-25	2021-11-16	M	74	专业技术服务业	广东省	广州市	越秀区	广东省广州市越秀区小北路232号	113.281	23.1445
124	广东省机械研究所	1992-07-04	1993-05-06	M	73	研究和试验发展	广东省	广州市	黄埔区	广东省广州市黄埔区镇东路202号	113.468	23.1282
125	广东省食品工业研究所	-	-	M	73	研究和试验发展	广东省	广州市	海珠区	广州市海珠区新港东路146号	113.348	23.103
126	广东省造纸研究所	-	-	C	26	化学原料和化学制品制造业	广东省	广州市	海珠区	广州市海珠区新港西路154号	113.307	23.0977
127	保利长大工程有限公司（曾用名：广东省长大公路工程有限公司）	1986-12-05	2021-11-05	E	48	土木工程建筑业	广东省	广州市	天河区	广州市广州大道中942号	113.335	23.2072
128	广东圣腾科技股份有限公司	2008-07-31	2020-09-10	M	74	专业技术服务业	广东省	广州市	天河区	广州市天河区天河北路626号1502房（本住所限写字楼功能）	113.348	23.1466
129	广东省建筑工程集团股份有限公司（曾用名：广东水电二局股份有限公司）	2001-12-27	2024-02-05	E	48	土木工程建筑业	广东省	广州市	增城区	广东省广州市增城区新塘镇广深大道西1号1幢水电广场A-1商务中心20层	113.607	23.1281
130	顺科智连技术股份有限公司（曾用名：广东顺科通信设备实业有限公司）	2009-03-30	2023-12-29	C	36	汽车制造业	广东省	广州市	增城区	广州市增城增江街纬四路9号厂房A1、A2、A3	113.851	23.2931
131	广东天信电力工程检测有限公司	1999-02-02	2024-01-29	E	48	土木工程建筑业	广东省	广州市	黄埔区	广州市黄埔区天丰路1号3栋401房	113.465	23.166
132	广东拓思软件科学园有限公司	2002-06-27	2023-12-28	I	65	软件和信息技术服务业	广东省	广州市	黄埔区	广东省广州市萝岗区广州经济技术开发区科学城彩频路11号	113.443	23.1686
133	广东旺大集团股份有限公司	2000-01-27	2020-01-16	C	13	农副食品加工业	广东省	广州市	黄埔区	广州市黄埔区科学城彩频路9号B座1002房	113.443	23.1684
134	广东温迪数字传播股份有限公司	2002-05-20	2016-12-23	R	86	新闻和出版业	广东省	广州市	越秀区	广州市越秀区东风中路300号之一自编19楼G房	113.273	23.1374
135	广东新禾道信息科技有限公司	2012-05-07	2024-03-26	M	73	研究和试验发展	广东省	广州市	黄埔区	广州市黄埔区科学大道237号401	113.464	23.1777
136	广东盈智通科技有限公司（曾用名：广东新康博思信息技术有限公司）	2006-10-25	2023-07-26	I	65	软件和信息技术服务业	广东省	广州市	天河区	广州市天河区天河直街30号3501房（仅限办公）	113.326	23.141
137	广东新粤交通投资有限公司	1998-05-29	2023-12-20	M	73	研究和试验发展	广东省	广州市	白云区	广州市白云区机场路1731、1733、1735号二楼	113.269	23.2058
138	广东兴亿海洋生物工程股份有限公司	2006-01-12	2020-07-31	M	73	研究和试验发展	广东省	广州市	黄埔区	广州市黄埔区光谱中路11号自编（2）栋2单元1004房	113.451	23.1655
139	广东雅琪生物科技股份有限公司（曾用名：广东雅琪生物科技有限公司）	2009-08-28	2023-11-09	M	73	研究和试验发展	广东省	广州市	番禺区	广州市番禺区东环街番禺大道北555号天安总部中心31号楼801室（部位：之二）	113.377	22.9853
140	广东盈嘉科技工程发展股份有限公司	2000-03-28	2023-10-30	E	48	土木工程建筑业	广东省	广州市	越秀区	广东省广州市越秀区水荫路2号西座507自编A01-1	113.316	23.141
141	公元管道（广东）有限公司（曾用名：广东永高塑业发展有限公司）	2004-06-08	2024-01-26	L	72	商务服务业	广东省	广州市	花都区	广州市花都区秀全街马溪村溪秀路8号	113.156	23.3599
142	优派控股集团有限公司（曾用名：广东优派家私集团有限公司）	2001-06-14	2023-05-22	C	21	家具制造业	广东省	广州市	花都区	广州市花都区华兴南路5号	113.241	23.3528
143	广东泽浩棒棒猪科技股份有限公司（曾用名：广东泽浩科技有限公司）	2011-06-27	2022-06-15	I	64	互联网和相关服务	广东省	广州市	白云区	广州市白云区云城东路565号3103房	113.277	23.1854
144	广东长荣科技有限公司	2002-12-25	2021-09-28	I	65	软件和信息技术服务业	广东省	广州市	天河区	广州市天河区东圃车陂黄洲工业区大院内五栋4楼	113.395	23.127
145	广东正鹏生物质能源科技有限公司	2011-09-21	2023-08-24	M	73	研究和试验发展	广东省	广州市	增城区	广州市增城区新塘镇民营西一路7号1805室	113.633	23.1538
146	广东中建普联科技股份有限公司（曾用名：广东中建普联科技有限公司）	2004-09-02	2024-01-05	M	74	专业技术服务业	广东省	广州市	天河区	广州市天河区汇苑街23号601房（仅限办公）	113.376	23.1486
147	广东众望通科技股份有限公司	2006-07-06	2023-02-03	I	65	软件和信息技术服务业	广东省	广州市	黄埔区	广东省广州市黄埔区科汇四街2号1103房	113.444	23.1725
148	广东珠荣工程设计有限公司	1993-08-25	2023-11-01	E	48	土木工程建筑业	广东省	广州市	天河区	广州市天河区天寿路105号天寿大厦6-7楼	113.339	23.1536
149	广盟环保新材料（广州）有限公司（曾用名：广盟（广州）包装有限公司）	2006-07-10	2021-09-02	C	26	化学原料和化学制品制造业	广东省	广州市	增城区	广州市增城区宁西街香山大道51号4号楼5层、6层、7层、8层	113.63	23.184
150	广州艾媒数聚信息咨询股份有限公司（曾用名：广州艾之媒信息咨询有限公司）	2010-08-20	2023-07-25	I	64	互联网和相关服务	广东省	广州市	番禺区	广州市番禺区新造镇智港大街15号1101、1102、1105室	113.424	23.0419
151	广州爱亿信息科技有限公司	2010-01-27	2021-12-09	C	39	计算机、通信和其他电子设备制造业	广东省	广州市	黄埔区	广州市黄埔区科学大道162号B1栋607房	113.458	23.1706
152	广州奥蓓斯化妆品有限公司	2009-09-14	2021-12-27	C	26	化学原料和化学制品制造业	广东省	广州市	花都区	广州市花都区新华街永利路自编88号	113.252	23.367
153	广州奥诚信息技术有限公司	2008-09-07	2023-11-29	I	65	软件和信息技术服务业	广东省	广州市	天河区	广州市天河区天河东路155、157、159号506（仅限办公用途）	113.339	23.1426
154	广州奥飞文化传播有限公司	2004-10-25	2023-11-28	R	86	新闻和出版业	广东省	广州市	越秀区	广州市越秀区太和岗路20号403号房	113.303	23.1486
155	广州奥凯信息咨询有限公司	2000-08-30	2021-06-29	L	72	商务服务业	广东省	广州市	黄埔区	广州市黄埔区科学大道235号301房	113.464	23.1778
156	广州奥姆特机电设备制造有限公司	2013-11-11	2022-09-15	C	34	通用设备制造业	广东省	广州市	南沙区	广州市南沙区市南公路1219号3栋301室3栋401室	113.429	22.8991
157	广州澳捷科技有限公司	2003-03-28	2023-03-21	C	39	计算机、通信和其他电子设备制造业	广东省	广州市	从化区	广州市从化区明珠工业园明珠大道南30号1栋901室	113.545	23.5715
158	广州澳医生物科技有限公司	2009-04-09	2016-12-29	M	75	科技推广和应用服务业	广东省	广州市	越秀区	广州市越秀区越华路112号3003A单元房（仅限办公使用）	113.274	23.1359
159	广州白云山光华制药股份有限公司	1993-01-30	2024-03-07	C	27	医药制造业	广东省	广州市	海珠区	广州市海珠区南石路一号	113.268	23.0813
160	广州白云液压机械厂有限公司	2003-01-30	2022-06-21	C	35	专用设备制造业	广东省	广州市	白云区	广州市白云区蚌湖镇杨屋岗路自编2号	113.279	23.1643
161	广州白云医用胶有限公司	2001-12-28	2023-12-29	C	27	医药制造业	广东省	广州市	黄埔区	广州高新技术产业开发区科学城金峰园路2号	113.457	23.185
162	佰聆数据股份有限公司（曾用名：广州佰聆信息科技有限公司）	2008-08-05	2023-01-05	M	73	研究和试验发展	广东省	广州市	越秀区	广州市高新技术产业开发区科学城科学大道162号创意大厦B3栋1301单元	113.458	23.1699
163	广州宝德凯智能装备有限公司	2010-09-08	2022-11-25	C	35	专用设备制造业	广东省	广州市	花都区	广州市花都区炭步镇兴华路3号	113.207	23.391
164	广州标点医药信息股份有限公司（曾用名：广州标点医药信息有限公司）	2005-07-01	2022-11-17	I	65	软件和信息技术服务业	广东省	广州市	越秀区	广州市越秀区东风东路745号1503、1504房（仅限办公用途）	113.311	23.1382
165	广州标际包装设备有限公司	2002-07-26	2022-03-08	C	40	仪器仪表制造业	广东省	广州市	黄埔区	广州经济技术开发区锦秀路明华三街1号振兴工业大厦303房	113.53	23.0646
166	广州冰泉制冷设备有限责任公司	2010-02-09	2024-04-03	C	34	通用设备制造业	广东省	广州市	番禺区	广州市番禺区石碁镇前锋北路44号101栋	113.449	22.9471
167	广州博进信息技术有限公司	2011-10-24	2023-11-10	I	65	软件和信息技术服务业	广东省	广州市	南沙区	广州市南沙区望江二街5号中惠璧珑湾自编12栋912房（仅限办公用途）	113.536	22.8062
168	广州博日信息科技有限公司	2009-10-26	2024-02-28	I	65	软件和信息技术服务业	广东省	广州市	天河区	广州市天河区广汕二路600号之二第二层202房（仅限办公）	113.419	23.1954
169	广州超远机电科技有限公司	2008-01-24	2023-07-10	M	75	科技推广和应用服务业	广东省	广州市	黄埔区	广州市黄埔区云埔工业区观达路20号园区第2栋4楼	113.55	23.1586
170	广州城北信息科技有限公司	2013-08-20	2021-05-06	M	75	科技推广和应用服务业	广东省	广州市	海珠区	广州市海珠区新港西路135号大院中大蒲园区628栋中大科技园A座自编号507室（仅限办公用途）	113.298	23.0991
171	广州城建开发设计院有限公司	1987-01-04	2023-08-31	E	47	房屋建筑业	广东省	广州市	天河区	广州市天河区天河北路天河北街9号首层	113.326	23.1457
172	广州船舶及海洋工程设计研究院	1986-04-10	2010-04-22	E	48	土木工程建筑业	广东省	广州市	越秀区	广州市越秀区麓湖路5号	113.287	23.1478
173	广州创尔生物技术股份有限公司	2002-08-20	2024-02-01	C	27	医药制造业	广东省	广州市	黄埔区	广州高新技术产业开发区香山路17号A栋4层1号	113.446	23.1856
174	广州科泰智慧有限公司（曾用名：广州创维平面显示科技有限公司）	2007-11-30	2022-08-24	C	39	计算机、通信和其他电子设备制造业	广东省	广州市	黄埔区	广州经济技术开发区科学城开达路99号	113.488	23.1792
175	广州达讯网络科技有限公司	2009-06-09	2019-04-08	I	65	软件和信息技术服务业	广东省	广州市	海珠区	广州市海珠区叠景路251号2405房（仅限办公）	113.32	23.0919
176	广州德恒汽车装备科技有限公司	2012-12-26	2023-08-16	C	39	计算机、通信和其他电子设备制造业	广东省	广州市	花都区	广州市花都区新华街岭东路9号之二	113.145	23.3579
177	广州德能热源设备有限公司	2005-08-11	2020-05-26	C	34	通用设备制造业	广东省	广州市	花都区	广州市花都区天贵路88号A座科技大楼711室；广州市番禺区钟村街钟屏岔道南侧1号厂房之一(一照多址）	113.23	23.4013
178	广州迪高建材有限公司	1994-06-03	2022-08-22	C	30	非金属矿物制品业	广东省	广州市	增城区	广州市增城区宁西街朱宁路36号	113.678	23.237
179	广州迪克医疗器械有限公司	2004-03-03	2024-03-27	C	35	专用设备制造业	广东省	广州市	黄埔区	广州经济技术开发区科学城广州国际企业孵化器A区601	113.454	23.1685
180	广州迪森家居环境技术有限公司（曾用名：广州迪森家用锅炉制造有限公司）	2000-11-15	2022-12-15	D	44	电力、热力生产和供应业	广东省	广州市	黄埔区	广州经济技术开发区东区沧联二路5号	113.559	23.122
181	广州帝奇医药技术有限公司	2011-01-31	2022-03-02	M	75	科技推广和应用服务业	广东省	广州市	黄埔区	广州国际生物岛螺旋三路8号第3层301、302、303单元	113.379	23.0668
182	广州鼎捷软件有限公司	2003-03-25	2023-02-09	I	65	软件和信息技术服务业	广东省	广州市	黄埔区	广州市黄埔区映日路119号1701房	113.463	23.1778
183	广州东荣轴承设备有限公司	1993-08-26	2023-07-14	C	34	通用设备制造业	广东省	广州市	南沙区	广州市南沙区东涌镇小乌村	113.436	22.8659
184	广州东昇机械有限公司	2002-05-31	2022-04-28	C	36	汽车制造业	广东省	广州市	花都区	广州市花都区新华街花港大道69号	113.159	23.3701
185	广州番禺电缆集团有限公司	2000-04-11	2023-10-25	C	38	电气机械和器材制造业	广东省	广州市	番禺区	广州市番禺区南村镇	113.387	23.0095
186	高勋绿色智能装备（广州）有限公司（曾用名：广州番禺高勋染整设备制造有限公司）	1997-12-15	2022-10-12	C	38	电气机械和器材制造业	广东省	广州市	番禺区	广州市番禺区东环街东艺路139号3栋501号房屋之一至四	113.349	22.985
187	广州番禺智达智能膜有限公司	2001-04-13	2016-04-14	C	29	橡胶和塑料制品业	广东省	广州市	番禺区	广州市番禺区石基镇旦岗村石场	113.39	22.9438
188	广州凡拓动漫科技有限公司	2012-12-18	2023-02-16	M	73	研究和试验发展	广东省	广州市	天河区	广州市天河区五山路261号自编18号首层至2楼（仅限办公）	113.352	23.1485
189	广州凡拓数字创意科技股份有限公司	2002-09-24	2024-04-07	M	73	研究和试验发展	广东省	广州市	天河区	广州市天河区龙怡路117号2701、2703、2704、2705、2706、2707	113.352	23.1497
190	广州飞机维修工程有限公司	1989-10-28	2023-04-06	G	56	航空运输业	广东省	广州市	花都区	广州花都区白云国际机场北区横十路	113.312	23.4028
191	广州飞瑞敖电子科技股份有限公司（曾用名：广州飞瑞敖电子科技有限公司）	2006-08-12	2024-02-23	M	73	研究和试验发展	广东省	广州市	番禺区	广州市番禺区东环街番禺大道北555号番禺节能科技园内天安科技创业中心503	113.371	22.9852
192	广东芬尼克兹环保科技有限公司（曾用名：广州芬尼克兹环保科技有限公司）	2011-08-03	2023-08-04	M	73	研究和试验发展	广东省	广州市	南沙区	广州市南沙区大岗镇天元路3号（自编2栋）	113.397	22.8048
193	广州丰川网络科技有限公司	2011-03-14	2024-01-25	M	73	研究和试验发展	广东省	广州市	增城区	广州市天河区龙口西路100号2层网纵众创空间第16单元（仅限办公）	113.343	23.1432
194	风神物流有限公司（曾用名：广州风神物流有限公司）	2002-09-03	2024-03-19	G	59	装卸搬运和仓储业	广东省	广州市	花都区	广州市花都区九塘路8号	113.178	23.3972
195	广州辐艾达机电设备有限公司	2005-01-11	2024-02-29	M	73	研究和试验发展	广东省	广州市	黄埔区	广州市黄埔区宏明路10号B104室	113.553	23.1209
196	广州富生源环保工程有限公司	2008-11-11	2021-12-23	E	48	土木工程建筑业	广东省	广州市	天河区	广州市天河区岑村圣堂大街14号B座三层3206（仅限办公）（不可作厂房使用）	113.39	23.1731
197	广州中科高成环保科技有限公司（曾用名：广州高成环保科技有限公司）	2010-03-15	2018-01-26	M	73	研究和试验发展	广东省	广州市	花都区	广州市花都区迎宾大道123号名高中心5层01室（仅限办公用途）（不可作厂房使用）	113.25	23.4021
198	广州戈兰迪新材料股份有限公司（曾用名：广州戈兰迪时尚家居制品股份有限公司）	2000-11-24	2023-05-23	C	26	化学原料和化学制品制造业	广东省	广州市	花都区	广州市花都区新华工业区新都大道旁	113.209	23.4079
199	广州格拉姆生物科技有限公司	2011-04-18	2021-04-25	M	73	研究和试验发展	广东省	广州市	黄埔区	广州市黄埔区开源大道11号A8栋301室	113.502	23.1594
200	广州共禾医药科技有限公司	2010-07-08	2023-10-20	M	73	研究和试验发展	广东省	广州市	黄埔区	广州高新技术产业开发区科学城揽月路8号自编一栋4层456	113.452	23.1674
201	广州固源电力工程设计有限公司	2005-12-23	2021-12-16	M	74	专业技术服务业	广东省	广州市	番禺区	广州市番禺区东环街番禺大道北537号番禺节能科技园内番山创业中心1号楼1区401（仅限办公用途）	113.37	22.9845
202	广州广电银通金融电子科技有限公司	2011-12-15	2023-10-31	J	69	其他金融业	广东省	广州市	天河区	广州市天河区高唐路228号	113.411	23.1699
203	广州广康医疗科技股份有限公司（曾用名：广州广康医疗科技有限公司）	2009-10-26	2023-12-19	M	73	研究和试验发展	广东省	广州市	荔湾区	广州市荔湾区威谷二街2号（自编B6）702、703房	113.251	23.1318
204	广州广冷华旭制冷空调实业有限公司	1988-01-11	2023-08-31	C	37	铁路、船舶、航空航天和其他运输设备制造业	广东省	广州市	花都区	广州市花都区新华街平步大道197号	113.213	23.4343
205	广州广一泵业有限公司	2004-12-10	2021-02-23	C	34	通用设备制造业	广东省	广州市	海珠区	广州市海珠区新滘南路北山村桥头大街228号之三3005房（仅限办公）	113.377	23.0907
206	广州广重企业集团有限公司	1967-04-20	2020-11-10	C	35	专用设备制造业	广东省	广州市	海珠区	广州市海珠区工业大道122号	113.261	23.0895
207	广州海博特医药科技有限公司	2009-10-22	2023-06-25	M	73	研究和试验发展	广东省	广州市	黄埔区	广州市黄埔区（广州国际生物岛）螺旋大道51号官洲生命科学创新中心A栋2708、2709、2710单元	113.382	23.0731
208	广州海成能源科技有限公司（曾用名：广州海诚能源科技有限公司）	2011-07-26	2021-02-02	M	73	研究和试验发展	广东省	广州市	番禺区	广州市番禺区番禺大道北555号番禺节能科技园内天安科技发展大厦814（不可作厂房使用）	113.375	22.9851
209	广州海滔环保科技有限公司	2009-11-09	2022-12-07	M	74	专业技术服务业	广东省	广州市	增城区	广州市增城新塘镇黄沙头村方中二路30号	113.654	23.1531
210	广州海颐软件有限公司	2013-08-22	2023-11-15	I	65	软件和信息技术服务业	广东省	广州市	黄埔区	广州经济技术开发区科汇四街10号501房	113.444	23.1742
211	广州汉泰环境技术有限公司	2013-03-15	2021-12-20	M	74	专业技术服务业	广东省	广州市	天河区	广州市天河区体育西路103号之一1705房（仅限办公）	113.327	23.1408
212	广州瀚信通信科技股份有限公司	2006-12-14	2023-10-26	I	65	软件和信息技术服务业	广东省	广州市	天河区	广州市天河区元岗横路37号4203-1、4204、4205、4208、4209、4304--4309	113.346	23.1818
213	广州豪特节能环保科技股份有限公司（曾用名：广州豪特电器设备有限公司）	2006-04-28	2024-03-25	M	75	科技推广和应用服务业	广东省	广州市	番禺区	广州市番禺区南村镇万博二路79号909房	113.356	23.0131
214	广州好迪集团有限公司	1992-08-10	2024-03-06	C	26	化学原料和化学制品制造业	广东省	广州市	白云区	广州市白云区广花三路386号	113.247	23.3033
215	广州合协软件技术有限公司	2006-09-11	2021-05-31	I	65	软件和信息技术服务业	广东省	广州市	黄埔区	广州市黄埔区起云路8号4栋501房	113.435	23.1738
216	广州合谐医疗科技有限公司	2008-12-27	2023-10-09	M	73	研究和试验发展	广东省	广州市	黄埔区	广州市黄埔区国际生物岛螺旋四路9号4栋第二层B201单元	113.377	23.067
217	和元达信息科技有限公司（曾用名：广州和元达信息科技有限公司）	2012-04-24	2024-02-07	M	73	研究和试验发展	广东省	广州市	海珠区	广州市海珠区昌岗东路257号之一1906、1907、1908、1909室（仅限办公）	113.284	23.0995
218	广州荷力胜蜂窝材料股份有限公司	1995-09-14	2022-01-26	C	26	化学原料和化学制品制造业	广东省	广州市	黄埔区	广州经济技术开发区永和经济区新业路7号。	113.572	23.1933
219	广州恒星制冷设备集团有限公司（曾用名：广州恒星冷冻机械制造有限公司）	1992-01-30	2019-03-18	C	34	通用设备制造业	广东省	广州市	黄埔区	广州经济技术开发区东区北片果园四路一号	113.521	23.1498
220	广州红海云计算股份有限公司（曾用名：广州红海网络科技开发有限公司）	2012-10-10	2023-05-15	I	65	软件和信息技术服务业	广东省	广州市	天河区	广州市天河区天河北路906号1308房	113.351	23.1464
221	广州宏信塑胶工业有限公司	1995-09-28	2023-12-04	C	30	非金属矿物制品业	广东省	广州市	黄埔区	广州市黄埔区开创大道728号3栋205房间	113.54	23.1423
222	广州鸿力筑工新材料有限公司（曾用名：广州鸿力复合材料有限公司）	2011-05-31	2023-01-06	C	26	化学原料和化学制品制造业	广东省	广州市	增城区	广州市增城区仙村镇沙滘村金联文化创意产业园自编D区1号厂房一、二、三层	113.747	23.2079
223	广州虎辉通用照明有限公司（曾用名：广州虎辉照明科技公司）	1968-05-02	2024-04-03	C	38	电气机械和器材制造业	广东省	广州市	荔湾区	广州市荔湾区西华路134号	113.252	23.1379
224	互动派科技股份有限公司（曾用名：广州互动派文化传播有限公司）	2005-04-15	2023-06-14	M	73	研究和试验发展	广东省	广州市	天河区	广州市天河区兴民路222号之一1504室，1505室，1506室，1507室	113.338	23.1215
225	广州华安信息科技有限公司	2006-07-03	2023-02-09	I	65	软件和信息技术服务业	广东省	广州市	天河区	广州市天河区体育西路111-115单号12楼G1（自编）（仅限办公）	113.328	23.1416
226	广州华宝食品有限公司（曾用名：广州华宝香精香料有限公司）	2008-01-15	2023-07-11	C	14	食品制造业	广东省	广州市	黄埔区	广州市黄埔区云骏路8号3栋102房	113.546	23.1506
227	广州华峰生物科技有限公司	2006-01-20	2023-03-01	M	73	研究和试验发展	广东省	广州市	黄埔区	广州市黄埔区开源大道188号十六栋501、601房	113.518	23.1611
228	广州华工环源绿色包装技术股份有限公司（曾用名：广州华工环源绿色包装技术有限公司）	2000-09-07	2022-12-06	M	74	专业技术服务业	广东省	广州市	天河区	广州高新技术产业开发区科学城科汇四街1号1101-2房	113.444	23.1734
229	广东华农高科生物药业有限公司（曾用名：广州华农大实验兽药有限公司）	1987-07-01	2019-10-12	C	27	医药制造业	广东省	广州市	天河区	广州市天河区五山华南农大校内9号楼旁	113.361	23.164
230	广州华仁亿和特种光纤科技有限公司	2012-06-21	2020-11-25	C	39	计算机、通信和其他电子设备制造业	广东省	广州市	黄埔区	广州高新技术产业开发区科学城科学大道182号创新大厦C3区第10层1003单元	113.462	23.172
231	广州华欣电子科技有限公司	2013-08-26	2024-03-08	M	73	研究和试验发展	广东省	广州市	黄埔区	广州高新技术产业开发区南翔二路72号1栋4-5楼及3楼303房	113.461	23.1588
232	广州华臻机械设备有限公司	1997-10-08	2021-06-24	C	34	通用设备制造业	广东省	广州市	花都区	广州市花都区赤坭镇培正路34号之六	113.1	23.398
233	广州化学试剂厂	1965-04-12	2023-12-20	C	26	化学原料和化学制品制造业	广东省	广州市	海珠区	广州市海珠区工业大道南882号	113.277	23.0897
234	广州汇安科技有限公司	1998-08-11	2022-09-23	I	65	软件和信息技术服务业	广东省	广州市	黄埔区	广州市黄埔区云埔街宏光路10号A座203室	113.551	23.1162
235	广州汇通国信科技有限公司（曾用名：广州汇通国信信息科技有限公司）	2011-12-28	2023-10-26	I	65	软件和信息技术服务业	广东省	广州市	黄埔区	广州市海珠区阅江西路366号广报中心北塔21楼	113.343	23.1126
236	广州惠利电子材料有限公司	2003-11-11	2021-01-22	C	26	化学原料和化学制品制造业	广东省	广州市	黄埔区	广州经济技术开发区东区骏功路39号	113.527	23.1368
237	广州慧能建设科技股份有限公司	2003-06-05	2019-08-20	M	73	研究和试验发展	广东省	广州市	越秀区	广州市高新技术产业开发区科学城掬泉路3号广州国际企业孵化器E区E301、E302、E303、E304号房	113.454	23.1685
238	广州火鹰信息科技有限公司	2005-04-30	2021-09-09	M	73	研究和试验发展	广东省	广州市	天河区	广州市天河区科韵路12号之一28、29楼2933房（仅限办公）	113.379	23.1322
239	广州家庭医生信息技术有限公司	2011-05-05	2023-02-06	M	73	研究和试验发展	广东省	广州市	白云区	广州市白云区鹤龙街鹤龙一路208号4702B房	113.275	23.2213
240	广州嘉泰软件有限公司	2002-04-11	2019-08-29	M	73	研究和试验发展	广东省	广州市	天河区	广州市天河区中山大道89号14层1433-1436（仅限办公）	113.363	23.1409
241	广州坚和网络科技有限公司	2012-03-14	2019-12-11	I	64	互联网和相关服务	广东省	广州市	天河区	广州市天河区五山路371号之一主楼1802单元	113.353	23.1527
242	广东建通地理信息集团股份有限公司（曾用名：广州建通测绘地理信息技术股份有限公司）	1996-03-01	2024-02-05	I	65	软件和信息技术服务业	广东省	广州市	增城区	广州市增城区宁西街创立路5号	113.625	23.183
243	广州江河幕墙系统工程有限公司	2007-06-18	2023-03-13	E	50	建筑装饰、装修和其他建筑业	广东省	广州市	增城区	广州市增城区宁西街创新大道25号	113.639	23.1674
244	广东捷玛节能科技股份有限公司（曾用名：广州捷玛换热设备有限公司）	2005-09-06	2023-11-20	C	34	通用设备制造业	广东省	广州市	黄埔区	广州市黄埔区南岗街笔岗路73号之二	113.547	23.1071
245	广州今泰科技股份有限公司	2002-04-30	2023-07-05	C	35	专用设备制造业	广东省	广州市	天河区	广州市经济技术开发区骏功路22号之一（1）栋201自编1号	113.525	23.1371
246	广州金鹏环保工程有限公司	2000-08-23	2023-02-27	N	77	生态保护和环境治理业	广东省	广州市	黄埔区	广州高新技术产业开发区科学城科学大道182号创新大厦C1区第七层702单元	113.463	23.1729
247	国检测试控股集团京诚检测有限公司（曾用名：广州京诚检测技术有限公司）	2008-01-25	2024-02-23	M	74	专业技术服务业	广东省	广州市	番禺区	广州市番禺区东环街迎星东路143号星力动漫游戏产业园B9、B11、B13号	113.382	22.9766
248	广州经传信息科技有限公司	2009-09-27	2023-05-04	I	65	软件和信息技术服务业	广东省	广州市	番禺区	广州市番禺区东环街番禺大道北555号天安总部中心2号楼1905房	113.378	22.9848
249	广东精点数据科技股份有限公司（曾用名：广州精点计算机科技有限公司）	2004-04-26	2023-10-23	I	65	软件和信息技术服务业	广东省	广州市	天河区	广州市天河区天河北路906号高科大厦A幢第7层701室（本住所限写字楼功能）	113.351	23.1464
250	广州精益汽车空调有限公司	2000-03-06	2015-12-07	C	36	汽车制造业	广东省	广州市	花都区	广州市花都区花山镇平山民营工业园7号	113.276	23.4385
251	广州九昭电子信息技术有限公司	2009-12-02	2022-02-18	M	73	研究和试验发展	广东省	广州市	天河区	广州市天河区黄村路51号八楼西（本住所限写字楼功能）	113.416	23.1315
252	广州军软科技有限公司	1997-04-21	2019-04-04	M	73	研究和试验发展	广东省	广州市	天河区	广州市天河区广园东路2193号3001-3002房	113.324	23.1601
253	广州骏鸿物流有限公司	1996-10-08	2019-07-09	G	58	多式联运和运输代理业	广东省	广州市	黄埔区	广州市黄埔区开发大道1333号	113.52	23.1192
254	广州凯媒通讯技术有限公司	2005-05-19	2023-12-29	C	39	计算机、通信和其他电子设备制造业	广东省	广州市	天河区	广州市天河区软件路15号第F栋第10层（仅限办公用途，不可作厂房）	113.42	23.1773
255	广州凯能电器科技有限公司	2008-05-23	2023-05-16	M	74	专业技术服务业	广东省	广州市	花都区	广州市花都区南阳庄四街4号2栋101房（空港花都）	113.267	23.3991
256	广州凯图电气股份有限公司	2010-11-18	2022-11-24	M	75	科技推广和应用服务业	广东省	广州市	番禺区	广州市番禺区石碁镇长坦路七巷20号2楼	113.445	22.9584
257	广东康利达物联科技有限公司（曾用名：广州康利达信息技术有限公司）	2001-12-06	2023-12-22	C	39	计算机、通信和其他电子设备制造业	广东省	广州市	天河区	广州市天河区思成路17号101房（仅限办公用途）	113.424	23.1797
258	广州科莱瑞迪医疗器材股份有限公司（曾用名：广州科莱瑞迪医疗器材有限公司）	2000-12-18	2023-09-28	M	73	研究和试验发展	广东省	广州市	番禺区	广州经济技术开发区沙湾三街6号	113.535	23.0728
259	广州瑞立科密汽车电子股份有限公司（曾用名：广州科密汽车电子控制技术股份有限公司）	2001-12-29	2023-10-20	C	36	汽车制造业	广东省	广州市	黄埔区	广州经济技术开发区科学城南翔支路1号	113.458	23.1613
260	广州科盛隆纸箱包装机械有限公司	1998-08-18	2023-03-22	C	22	造纸和纸制品业	广东省	广州市	番禺区	广州市番禺区石壁街石壁一村谢石公路77号	113.294	23.0006
261	南方电网数字电网科技（广东）有限公司（曾用名：广州科腾信息技术有限公司）	2007-08-06	2023-06-29	D	44	电力、热力生产和供应业	广东省	广州市	黄埔区	广州市黄埔区光谱中路11号2栋3单元14层全层	113.451	23.1655
262	广州科讯技术有限公司	2000-01-25	2017-04-14	M	74	专业技术服务业	广东省	广州市	天河区	广州市天河区中山大道89号B6层南3-4号	113.363	23.1409
263	广州酷漫居动漫科技有限公司	2008-12-25	2019-02-21	M	73	研究和试验发展	广东省	广州市	黄埔区	广州高新技术产业开发区科学城科学大道182号创新大厦C2栋8楼	113.462	23.1723
264	广州酷游信息科技有限公司	2018-05-24	2020-09-07	I	65	软件和信息技术服务业	广东省	广州市	黄埔区	广州市黄埔区水西路193号415房	113.49	23.1974
265	广州扩普科技发展有限公司	2004-03-29	2024-03-08	M	73	研究和试验发展	广东省	广州市	天河区	广州市天河区建中路48-50号一楼A30房（仅限办公）	113.378	23.1307
266	广州兰格电气设备有限公司	2005-04-18	2020-09-02	C	38	电气机械和器材制造业	广东省	广州市	番禺区	广州市番禺区沙湾镇福涌村福龙路民营工业区四街5号之一	113.339	22.9267
267	广州蓝图地理信息技术有限公司	2004-08-02	2023-08-31	I	65	软件和信息技术服务业	广东省	广州市	天河区	广州市天河区长福路219号H3房	113.355	23.172
268	广州朗国电子科技股份有限公司（曾用名：广州朗国电子科技有限公司）	2013-04-17	2023-12-01	C	39	计算机、通信和其他电子设备制造业	广东省	广州市	黄埔区	广州市黄埔区（中新广州知识城）亿创街1号406号房之238	113.555	23.3308
269	广州朗晴电动车有限公司	2000-01-25	2020-12-24	C	37	铁路、船舶、航空航天和其他运输设备制造业	广东省	广州市	南沙区	广州市南沙区东涌镇太石村	113.407	22.8873
270	广州乐庚信息科技有限公司	2007-04-05	2023-09-19	M	74	专业技术服务业	广东省	广州市	黄埔区	广州市经济技术开发区科学城彩频路11号A栋608房	113.443	23.1679
271	广东丽格科技股份有限公司（曾用名：广州丽格打印耗材有限公司）	2000-02-04	2022-07-25	M	73	研究和试验发展	广东省	广州市	增城区	广州市增城区石滩镇三江荔三路797号	113.864	23.1919
272	广州丽盈塑料有限公司	2006-01-05	2024-03-12	C	26	化学原料和化学制品制造业	广东省	广州市	增城区	广州市增城市增江街东区高科技工业基地	113.856	23.2755
273	广州联存医药科技股份有限公司（曾用名：广州联存医药科技有限公司）	2011-01-13	2023-09-01	M	73	研究和试验发展	广东省	广州市	白云区	广州市白云区钟落潭镇红旗路49号	113.411	23.3917
274	广州联祥汽车用品有限公司	2008-06-10	2022-10-31	C	36	汽车制造业	广东省	广州市	白云区	广州市白云区嘉禾街田岭工业区新科下村麦崧头大街15号厂房2栋303室	113.298	23.2578
275	广州岭南电缆股份有限公司	1995-12-19	2023-09-01	C	38	电气机械和器材制造业	广东省	广州市	南沙区	广州市南沙区榄核镇人绿路163号	113.352	22.8593
276	广州六米网络科技有限公司	2012-10-10	2023-09-13	M	75	科技推广和应用服务业	广东省	广州市	天河区	广州市天河区建工路12号501房自编501-1房（仅限办公）	113.378	23.1288
277	秘理普（广州）植物技术开发股份有限公司（曾用名：广州秘理普植物技术开发有限公司）	2007-07-19	2018-11-16	M	73	研究和试验发展	广东省	广州市	黄埔区	广州高新技术产业开发区科学城科学大道182号C2区第4层404单元	113.442	23.166
278	广州敏瑞汽车零部件有限公司	2004-03-15	2022-04-28	C	36	汽车制造业	广东省	广州市	黄埔区	广州市黄埔区永顺大道西9号	113.55	23.2065
279	广州明朝互动科技股份有限公司（曾用名：广州明朝信息技术有限公司）	2012-08-08	2021-12-08	I	64	互联网和相关服务	广东省	广州市	天河区	广州市天河区科韵路16号自编1栋1001	113.38	23.1314
280	广州铭铉净化设备科技有限公司	2006-01-26	2023-04-07	C	35	专用设备制造业	广东省	广州市	黄埔区	广州市黄埔区开创大道1936号（自编号H6栋）1511房（仅限办公）	113.506	23.1796
281	广州南方宜信信息科技有限公司	2010-08-10	2018-03-02	I	65	软件和信息技术服务业	广东省	广州市	白云区	广州市白云区沙太南路1023号教学保障楼615房	113.341	23.195
282	广州欧划动画技术有限公司	2005-09-28	2023-01-20	M	74	专业技术服务业	广东省	广州市	海珠区	广州市海珠区新港中路354号第76栋2楼东侧办公区、3楼制作间	113.327	23.1011
283	广州普华灵动机器人技术有限公司	2011-01-26	2024-01-23	M	74	专业技术服务业	广东省	广州市	花都区	广州市花都区秀全街永祥路4号	113.173	23.4003
284	广州普瑞电力控制系统设备有限公司	2000-03-29	2024-02-21	M	74	专业技术服务业	广东省	广州市	黄埔区	广州高新技术产业开发区科学城南云三路39号B栋三楼301房	113.453	23.1622
285	广州七七八二信息科技有限公司	2010-11-19	2020-04-28	M	73	研究和试验发展	广东省	广州市	天河区	广州市天河区科韵北路108号2楼自编G09房	113.39	23.1661
286	广州启生信息技术有限公司	2006-04-11	2021-11-12	I	65	软件和信息技术服务业	广东省	广州市	天河区	广州市天河区珠江东路13号1101室（仅限办公）	113.333	23.1266
287	广州轻机机械设备有限公司	2010-02-09	2023-01-17	F	51	批发业	广东省	广州市	海珠区	广州市海珠区南边路38号之二十七107之一室（仅限办公，不可作厂房使用）	113.27	23.0841
288	广州全通数码科技有限公司	2000-08-09	2022-08-24	M	73	研究和试验发展	广东省	广州市	海珠区	广州市海珠区敦和路189号大院第3栋自编605	113.326	23.0941
289	广州仁恒医药科技股份有限公司（曾用名：广州仁恒医药科技有限公司）	2013-04-07	2022-04-02	M	73	研究和试验发展	广东省	广州市	黄埔区	广州市黄埔区开源大道11号A3栋301室	113.502	23.1594
290	广州荣鑫容器有限公司	2001-02-21	2022-03-10	C	33	金属制品业	广东省	广州市	黄埔区	广州经济技术开发区锦秀路25-27号	113.395	22.7882
291	广州瑞辉生物科技股份有限公司（曾用名：广州瑞辉生物医疗科技有限公司）	2012-08-07	2023-07-03	M	73	研究和试验发展	广东省	广州市	黄埔区	广州市黄埔区东吉路11号5楼	113.493	23.1505
292	广州瑞远新材料股份有限公司（曾用名：广州瑞远新材料有限公司）	2012-08-20	2024-03-26	M	73	研究和试验发展	广东省	广州市	南沙区	广州市南沙区黄阁镇市南公路黄阁段230号 （自编四栋合金部）121房	113.515	22.8333
293	广州睿玛科防水电器股份有限公司	2009-03-12	2023-11-03	C	39	计算机、通信和其他电子设备制造业	广东省	广州市	黄埔区	广州市黄埔区开源大道188号H栋厂房第三层	113.518	23.1611
294	广州赛宝腾睿信息科技有限公司	2006-08-14	2024-03-12	M	73	研究和试验发展	广东省	广州市	天河区	广州市天河区东莞庄路110号科研综合楼601-612房	113.344	23.1604
295	广州赛宝仪器设备有限公司	2011-07-14	2021-05-12	C	35	专用设备制造业	广东省	广州市	天河区	广州市天河区东莞庄路110号	113.344	23.16
296	广州赛意信息科技股份有限公司（曾用名：广州赛意信息科技有限公司）	2005-01-10	2023-11-08	M	73	研究和试验发展	广东省	广州市	天河区	广州市天河区珠江东路12号1601（部位：自编03-05单元）	113.334	23.1254
297	广州三晶电气股份有限公司（曾用名：广州三晶电气有限公司）	2005-09-19	2022-06-06	C	38	电气机械和器材制造业	广东省	广州市	黄埔区	广州高新技术产业开发区科学城荔枝山路9号	113.445	23.185
298	广州三拓识别技术有限公司	2004-01-15	2018-07-16	C	39	计算机、通信和其他电子设备制造业	广东省	广州市	黄埔区	广州经济技术开发区开发大道231号、锦绣路52号五楼之三	113.796	23.2645
299	广州桑瑞通信设备有限公司	2002-06-27	2022-11-04	C	39	计算机、通信和其他电子设备制造业	广东省	广州市	黄埔区	广州高新技术产业开发区科学城开源大道182号	113.517	23.1627
300	广州商脉网络科技有限公司	2006-10-08	2020-11-19	I	65	软件和信息技术服务业	广东省	广州市	天河区	广州市天河区科韵北路108号2楼自编G08房	113.39	23.1661
301	广州熵能创新材料股份有限公司	2003-12-30	2023-01-12	M	73	研究和试验发展	广东省	广州市	番禺区	广州市番禺区东环街番禺大道北555号番禺节能科技园内天安科技交流中心901	113.374	22.9862
302	广州尚恩科技股份有限公司	2003-06-04	2023-10-17	I	65	软件和信息技术服务业	广东省	广州市	天河区	广州市天河区黄埔大道路159号8E房	113.331	23.1336
303	广州声博士声学技术有限公司	2008-06-06	2023-11-17	M	73	研究和试验发展	广东省	广州市	番禺区	广州市番禺区石楼镇华山路12号	113.482	22.9657
304	广州石井力展新型建筑材料有限公司	2008-05-20	2016-04-14	C	30	非金属矿物制品业	广东省	广州市	白云区	广州市白云区石井街广海路180号	113.229	23.1918
305	广州石头造环保科技股份有限公司	2011-12-16	2020-12-11	M	75	科技推广和应用服务业	广东省	广州市	番禺区	广州市番禺区沙湾镇大涌口村锦南二街一横巷22号101	113.301	23.0355
306	广东爱码科技股份有限公司（曾用名：广州市爱码电子有限公司）	2004-06-12	2024-04-08	I	65	软件和信息技术服务业	广东省	广州市	天河区	广州市天河区大观南路36号之三二层自编A81-A89房（仅限办公）（不可作厂房使用）	113.417	23.1421
307	广州市安骐汽车用品有限公司	2005-12-23	2019-12-20	C	36	汽车制造业	广东省	广州市	白云区	广州市白云区钟落潭镇长沙埔松园路20号（自主申报）	113.416	23.3975
308	广州市奥杰信息技术有限公司	1999-09-09	2016-07-26	I	65	软件和信息技术服务业	广东省	广州市	天河区	广州市天河区龙口东路34号1401房自编1409单元	113.348	23.1432
309	广州市百成科技有限公司	2000-08-23	2023-07-28	I	65	软件和信息技术服务业	广东省	广州市	黄埔区	广州市黄埔区科学大道182号C2栋303房	113.461	23.172
310	广州市百利文仪实业有限公司	2000-12-21	2019-06-10	C	21	家具制造业	广东省	广州市	从化区	广州市从化经济开发区福从路19号A栋、B栋	113.512	23.4548
311	广州市柏涛信息技术有限责任公司	2011-09-30	2016-06-23	M	75	科技推广和应用服务业	广东省	广州市	天河区	广州市天河区华观路1933号之一（商业、办公楼自编B栋）718房（仅限办公用途）	113.409	23.1746
312	广州市毕柏思信息技术有限公司	2010-03-30	2023-09-05	I	65	软件和信息技术服务业	广东省	广州市	白云区	广州市海珠区琶洲大道东8号1004房自编B020（仅限办公）	113.378	23.106
313	广州市博仕奥生化技术研究有限公司	2001-08-06	2022-10-13	M	73	研究和试验发展	广东省	广州市	黄埔区	广州市黄埔区永安大道118号1号厂房601房	113.58	23.2215
314	广州市诚一水产科技有限公司	2002-11-06	2021-12-24	M	73	研究和试验发展	广东省	广州市	番禺区	广州市番禺区桥南街陈涌村陈涌东三巷6号101	113.379	22.9245
315	广州市诚毅科技软件开发有限公司	1999-03-15	2024-03-27	I	65	软件和信息技术服务业	广东省	广州市	海珠区	广州市海珠区广州大道南368号26楼	113.336	23.2143
316	广州市德固制冷设备有限公司	2010-12-09	2024-01-22	C	34	通用设备制造业	广东省	广州市	南沙区	广州市南沙区榄核镇禺山工业街3号之七101	113.353	22.845
317	广州市迪拓信息科技有限公司	2010-03-31	2023-08-31	I	65	软件和信息技术服务业	广东省	广州市	黄埔区	广州市黄埔区科学大道286号401-2、401-3	113.465	23.174
318	广州一建建设集团有限公司（曾用名：广州市第一建筑工程有限公司）	2006-11-10	2023-07-10	E	47	房屋建筑业	广东省	广州市	南沙区	广州市南沙区进港大道8号2108房	113.554	22.807
319	广州市都享信息科技有限公司	2010-07-07	2022-07-26	I	65	软件和信息技术服务业	广东省	广州市	番禺区	广州市番禺区东环街金山谷创意十街11号301之二	113.39	22.9563
320	广州市科腾智能装备股份有限公司（曾用名：广州市番禺科腾工业有限公司）	1998-11-12	2020-03-30	C	39	计算机、通信和其他电子设备制造业	广东省	广州市	番禺区	广州市番禺区石基镇雁洲村雁洲路	113.428	22.9315
321	广州市房贝贝网络技术有限公司（曾用名：广州市房掌柜网络技术有限公司）	2013-03-01	2023-02-21	I	65	软件和信息技术服务业	广东省	广州市	天河区	广州市天河区华夏路30号1009室（仅限办公，不作厂房使用）	113.328	23.1319
322	广州市福思特科技有限公司	2001-06-07	2023-05-10	I	65	软件和信息技术服务业	广东省	广州市	海珠区	广州市海珠区仑头路21号广东财经大学财大创谷B栋203-3号房（仅限办公）	113.361	23.0967
323	广州市高奈特网络科技有限公司	2006-09-12	2022-07-06	C	39	计算机、通信和其他电子设备制造业	广东省	广州市	荔湾区	广州市荔湾区花地大道中64号2508室（仅限办公）	113.241	23.1024
324	广州市耕源文化传播有限公司	2005-11-10	2024-01-08	L	72	商务服务业	广东省	广州市	白云区	广州市白云区鹤龙街启德路36号514房（自主申报）	113.296	23.2337
325	广州市海捷计算机科技有限公司	2002-12-15	2020-04-15	M	73	研究和试验发展	广东省	广州市	天河区	广州市天河区建中路36号405房（仅限办公功能）	113.377	23.1308
326	广州市海森环保科技股份有限公司	2003-06-17	2022-11-16	N	77	生态保护和环境治理业	广东省	广州市	荔湾区	广州市荔湾区荷景南路21号自编2栋2楼C206号房	113.254	23.0609
327	广州市海奕电子科技有限公司	2004-09-22	2020-12-15	M	73	研究和试验发展	广东省	广州市	越秀区	广州市越秀区水荫路2号西座502自编B31	113.316	23.1407
328	广州市豪特粘接材料有限公司	2005-10-08	2020-05-14	C	26	化学原料和化学制品制造业	广东省	广州市	白云区	广州市白云区北太路1633号广州民营科技园白云电气科技大厦13层01D室	113.342	23.3045
329	广州市浩通实业有限公司（曾用名：广州市浩通计算机科技有限公司）	2004-11-18	2021-03-16	C	24	文教、工美、体育和娱乐用品制造业	广东省	广州市	天河区	广州市天河区建中路6,8号首层1#	113.378	23.1326
330	广州市河东电子有限公司	1999-01-19	2017-04-10	C	39	计算机、通信和其他电子设备制造业	广东省	广州市	天河区	广州市天河区建中路22.24号首层	113.38	23.1336
331	广州市恒吉电子科技有限公司	2003-06-04	2024-01-19	M	73	研究和试验发展	广东省	广州市	黄埔区	广州市黄埔区开源大道188号自编七栋202房	113.518	23.1611
332	广州市弘宇科技有限公司	2000-04-20	2023-02-20	C	39	计算机、通信和其他电子设备制造业	广东省	广州市	海珠区	广州市海珠区新港中路381号	113.328	23.1023
333	广州市华驰信息科技有限公司	2004-06-24	2022-06-28	I	65	软件和信息技术服务业	广东省	广州市	番禺区	广州市番禺区石碁镇亚运大道1003号1号楼2座501	113.453	22.9457
334	广州市华南农大生物药品有限公司	2004-12-08	2023-07-31	C	27	医药制造业	广东省	广州市	增城区	广州市增城增江街东区高科技工业基地	113.856	23.2755
335	广州市华崴演出器材有限公司	2004-05-12	2018-11-20	C	24	文教、工美、体育和娱乐用品制造业	广东省	广州市	白云区	广州市白云区钟落潭镇广从九路368号103	113.457	23.399
336	广州华宇硅氟新材料有限公司（曾用名：广州市华宇化工有限公司）	1997-11-20	2021-11-04	C	26	化学原料和化学制品制造业	广东省	广州市	花都区	广州市花都区花山镇源和村	113.282	23.5024
337	广州市汇源通信建设监理有限公司	2001-03-13	2023-03-27	M	74	专业技术服务业	广东省	广州市	海珠区	广州市天河区体育东路六运五街52号二楼	113.336	23.1359
338	广州市建筑材料工业研究所有限公司	2003-10-31	2023-07-14	M	74	专业技术服务业	广东省	广州市	黄埔区	广州高新技术产业开发区科学城科研路2号	113.446	23.176
339	广州市捷信通科技发展有限公司	1998-08-17	2022-10-17	M	75	科技推广和应用服务业	广东省	广州市	越秀区	广州市越秀区先烈中路100-67号4楼自编405房	113.307	23.1475
340	广州市捷众智能科技有限公司	1999-12-16	2020-05-15	C	39	计算机、通信和其他电子设备制造业	广东省	广州市	黄埔区	广州高新技术产业开发区玉树工业园敬业三街7号D栋403房	113.439	23.1614
341	凯泰科（中国）医疗器械股份有限公司（曾用名：广州市巨特电子产品有限公司）	2007-08-29	2021-06-15	C	35	专用设备制造业	广东省	广州市	番禺区	广州市番禺区石楼镇官桥村西瓜坑	113.463	22.9851
342	广东康软科技股份有限公司（曾用名：广州市康软信息科技有限公司）	2002-06-10	2023-04-25	I	65	软件和信息技术服务业	广东省	广州市	天河区	广州市天河区软件路11号703室（仅限办公用途）	113.419	23.1773
343	广东科迪隆科技有限公司（曾用名：广州市科迪隆科学仪器设备有限公司）	2000-09-30	2023-12-29	M	73	研究和试验发展	广东省	广州市	越秀区	广州市越秀区解放南路123号803之B23	113.269	23.1231
344	广州市力融计算机技术有限公司	2004-01-02	2023-07-11	I	65	软件和信息技术服务业	广东省	广州市	天河区	广州市天河区大观中路95号2栋503房（仅限办公）	113.413	23.1574
345	广州市利迪网络科技有限公司	2008-05-18	2023-06-02	M	74	专业技术服务业	广东省	广州市	黄埔区	广州市黄埔区科学大道111号主楼101-2	113.446	23.1724
346	广州市领域软件科技有限公司（曾用名：广州市联拓科技有限公司）	2000-12-25	2017-02-27	I	65	软件和信息技术服务业	广东省	广州市	越秀区	广州市越秀区先烈中路100号大院15号之一2楼201房（仅限办公用途）	113.306	23.1455
347	广州市凌捷医疗器械有限公司	2005-06-28	2023-11-07	C	35	专用设备制造业	广东省	广州市	荔湾区	广州市荔湾区荷景路13号4栋302	113.256	23.0616
348	广州市聆溢表业有限公司	2009-10-12	2022-02-23	C	40	仪器仪表制造业	广东省	广州市	增城区	广州市增城区荔新九路19号3栋1-4层	113.694	23.1803
349	广州市鲁班建筑科技集团股份有限公司（曾用名：广州市鲁班建筑集团有限公司）	2007-10-11	2022-11-09	M	73	研究和试验发展	广东省	广州市	越秀区	广州市越秀区沿江中路298号C栋15楼D,C栋15楼G	113.285	23.1212
350	广州市曼博瑞材料科技有限公司	2008-05-07	2019-03-15	M	73	研究和试验发展	广东省	广州市	黄埔区	广州经济技术开发区沙湾三街14号502房	113.537	23.0725
351	广州市美柯船舶电气设备有限公司	2007-07-17	2021-12-20	C	37	铁路、船舶、航空航天和其他运输设备制造业	广东省	广州市	南沙区	广州市南沙区榄核镇广珠路132号厂房及综合楼	113.394	22.8603
352	广州市耐贝西照明有限公司	2005-04-13	2021-11-03	C	38	电气机械和器材制造业	广东省	广州市	白云区	广州市白云区人和镇蚌湖江人二路220号	113.268	23.3047
353	广州市欧克地理信息技术有限公司	2002-05-08	2023-07-06	M	73	研究和试验发展	广东省	广州市	黄埔区	广州高新技术产业开发区科学城科学大道162号创意大厦B3区第14层1401-C单元	113.458	23.1699
354	鹏凯环境科技股份有限公司（曾用名：广州市鹏凯水处理设备有限公司）	2011-09-09	2023-04-03	M	74	专业技术服务业	广东省	广州市	番禺区	广州市番禺区东环街番禺大道北555号天安总部中心11号楼401之一	113.375	22.9874
355	广州市齐明软件科技有限公司	2013-09-10	2023-10-13	C	39	计算机、通信和其他电子设备制造业	广东省	广州市	黄埔区	广州市黄埔区彩频路7号301、303房	113.441	23.1694
356	广州市侨鑫医疗器械科技发展有限公司	2001-10-24	2024-03-08	M	73	研究和试验发展	广东省	广州市	白云区	广州市白云区松洲街槎龙村聚龙街28号五楼六楼	113.241	23.1858
357	广州市庆瑞电子科技有限公司	2002-01-09	2018-12-05	M	73	研究和试验发展	广东省	广州市	黄埔区	广州高新技术产业开发区光谱西路3号研发厂房二楼北侧	113.425	23.1645
358	广州市人民印刷厂股份有限公司	1986-12-24	2023-12-28	C	23	印刷和记录媒介复制业	广东省	广州市	白云区	广州市白云区黄石路江夏村元下底路188号自编8号	113.279	23.2157
359	广州市锐美汽车零部件有限公司	2010-03-23	2023-05-09	C	36	汽车制造业	广东省	广州市	南沙区	广州市南沙区榄核镇广珠路95号自编1栋（办公楼），自编2栋（厂房）	113.4	22.8408
360	齐天云（广州）科技有限公司（曾用名：广州市润宏软件科技有限公司）	2007-11-02	2023-08-17	M	73	研究和试验发展	广东省	广州市	天河区	广州市天河区天河东路240号502房（仅限办公）	113.34	23.1438
361	广州市润杰医疗器械有限公司	2003-04-18	2023-05-15	I	65	软件和信息技术服务业	广东省	广州市	黄埔区	广州市黄埔区开泰大道28号11楼	113.476	23.1687
362	广州市仁和机械设备有限公司	-	-	M	73	研究和试验发展	广东省	广州市	番禺区	广州市番禺区东环街番禺大道北555号天安总部中心23号楼2501之一	113.381	22.9842
363	广州市赛普电子科技有限公司	2006-07-07	2020-10-29	C	39	计算机、通信和其他电子设备制造业	广东省	广州市	黄埔区	广州市黄埔区科学大道48号2707房（仅限办公）	113.436	23.1706
364	广州市尚雷仕卫浴有限公司	2007-08-21	2022-09-23	C	35	专用设备制造业	广东省	广州市	增城区	广州市增城区增江街荔三大道38号之四	113.851	23.2931
365	广州市设计院	-	-	M	74	专业技术服务业	广东省	广州市	天河区	广州市天河区体育东路体育东横街３－５号	113.336	23.135
366	广州市申迪计算机系统有限公司	1998-10-09	2022-12-06	I	65	软件和信息技术服务业	广东省	广州市	越秀区	广州市越秀区中山一路金羊一街2号1楼（不可作厂房使用）	113.316	23.1343
367	广州诗尼曼家居股份有限公司（曾用名：广州市诗尼曼家居有限公司）	2013-06-08	2023-10-25	C	21	家具制造业	广东省	广州市	番禺区	广州市番禺区石楼镇莲花山联围村浮莲岗（主厂房、办公楼）	113.504	22.9676
368	广州市水电建设工程有限公司	1985-01-15	2024-02-06	E	48	土木工程建筑业	广东省	广州市	越秀区	广州市越秀区寺右南路19号首层	113.315	23.123
369	广州佳贝尔环保有限公司（曾用名：广州市陶氏环保科技有限公司）	2010-03-29	2022-03-02	N	77	生态保护和环境治理业	广东省	广州市	番禺区	广州市番禺区石壁街石壁三村谢石公路98号	113.285	23.0049
370	广州市特威工程机械有限公司	2011-12-15	2023-04-24	E	49	建筑安装业	广东省	广州市	白云区	广州市白云区神山镇五丰工业大道318号之一	113.178	23.3281
371	广州市天驰测绘技术有限公司	2004-12-30	2023-10-27	M	74	专业技术服务业	广东省	广州市	天河区	广州市天河区高普路1021号701室（仅限办公）	113.419	23.1792
372	广州天惠食品股份有限公司（曾用名：广州市天惠食品有限公司）	2002-04-09	2021-02-24	C	14	食品制造业	广东省	广州市	黄埔区	广州市黄埔区永安大道63号1栋303,1栋403	113.58	23.2231
373	广州市天誉创高电子科技有限公司	2006-03-27	2021-08-19	C	39	计算机、通信和其他电子设备制造业	广东省	广州市	黄埔区	广州经济技术开发区明珠路16号三层、四层	113.526	23.0644
374	广州市拓璞电器发展有限公司	2000-12-28	2023-07-12	C	39	计算机、通信和其他电子设备制造业	广东省	广州市	花都区	广州市花都区花东镇北兴大道19号	113.333	23.443
375	广州市拓维信息有限公司	2000-02-23	2023-11-09	I	65	软件和信息技术服务业	广东省	广州市	天河区	广州市天河区沙太南路85号五楼521-A04	113.333	23.1758
376	广州市万鸿计算机科技有限公司	2005-09-19	2018-12-29	I	65	软件和信息技术服务业	广东省	广州市	天河区	广州市天河区天河北路892号14楼自编1409房（仅限办公用途）	113.351	23.1471
377	广州市威格林环保科技有限公司	2010-02-12	2021-06-08	M	73	研究和试验发展	广东省	广州市	番禺区	广州市番禺区小谷围街青蓝街26号1403（1403-12）单元	113.393	23.0628
378	广州市微柏软件股份有限公司（曾用名：广州市微柏软件有限公司）	2002-02-06	2023-11-03	I	65	软件和信息技术服务业	广东省	广州市	天河区	广州市天河区天河路490号1601房	113.342	23.1387
379	广州市味研生物工程科技有限公司	2000-07-26	2022-09-22	M	73	研究和试验发展	广东省	广州市	黄埔区	广州高新技术产业开发区科学城揽月路3号广州国际企业孵化器G区G208房	113.454	23.1685
380	广州市希力电子科技有限公司	2006-04-12	2019-12-18	M	73	研究和试验发展	广东省	广州市	天河区	广州市天河区高普路1033号6层601室（仅限办公用途）	113.418	23.178
381	广州市先益农农业科技有限公司	2002-07-03	2019-05-29	C	26	化学原料和化学制品制造业	广东省	广州市	天河区	广州市天河区明旭街1号（自编B1栋）1104-1108房（仅限办公）（不可作厂房使用）	113.373	23.1403
382	广州市新泛联数码科技有限公司	2004-11-18	2017-08-28	M	73	研究和试验发展	广东省	广州市	番禺区	广州市番禺区南村镇里仁洞村冼庄金光大道北一街6号201	113.356	22.9965
383	广州新尚艺术股份有限公司（曾用名：广州市新尚雕塑工艺品有限公司）	2005-01-06	2022-12-19	C	24	文教、工美、体育和娱乐用品制造业	广东省	广州市	南沙区	广州市南沙区万顷沙镇福安西二街8号	113.559	22.7122
384	广东信佰工程监理有限公司（曾用名：广州市信佰信息技术咨询有限公司）	2002-12-31	2022-09-06	M	74	专业技术服务业	广东省	广州市	天河区	广州市天河区海安路13号之一2403室	113.347	23.1306
385	广州市信和电信发展有限公司	1998-06-23	2021-01-12	M	73	研究和试验发展	广东省	广州市	黄埔区	广州市经济技术开发区科学城彩频路11号A504、A509（仅限办公用途）	113.443	23.1686
386	广州市信农生物科技有限公司	2008-04-21	2023-04-21	M	73	研究和试验发展	广东省	广州市	白云区	广州市白云区太和镇草庄中路251号102房（仅限办公用途）（不可作厂房使用）	113.347	23.326
387	广州市讯飞樽鸿信息技术有限公司	2009-12-25	2024-04-01	M	73	研究和试验发展	广东省	广州市	天河区	广州市天河区高唐路261号时代E-PARK（天河）二期园区9栋1105、1106单元（仅限办公）	113.409	23.1729
388	广州市雅江光电设备有限公司	2003-09-29	2017-06-20	C	38	电气机械和器材制造业	广东省	广州市	花都区	广州市花都区花山镇华辉路18号	113.295	23.469
389	广州市耀安实业发展有限公司	1996-11-08	2020-11-04	C	38	电气机械和器材制造业	广东省	广州市	南沙区	广州市南沙区东涌镇大同村市灵路2号（厂房1）101	113.401	22.8976
390	广州市仪美医用家具科技股份有限公司（曾用名：广州市仪美医用家具科技有限公司）	2010-12-08	2023-11-08	M	73	研究和试验发展	广东省	广州市	白云区	广州市白云区北太路1633号广州民营科技园科兴西路13号自编B1-B2栋1楼、B1栋2楼北侧	113.341	23.3015
391	广东易臣信息技术有限公司（曾用名：广州市易臣信息技术有限公司）	2008-05-14	2023-11-28	I	65	软件和信息技术服务业	广东省	广州市	天河区	广州市天河区长湴白沙水路93号301房（仅限办公）	113.357	23.1836
392	易票联支付有限公司（曾用名：广州市易票联支付技术有限公司）	1999-03-22	2020-04-03	J	69	其他金融业	广东省	广州市	海珠区	广州市海珠区广州大道南368号11楼A	113.336	23.2143
393	广州市溢信科技股份有限公司（曾用名：广州市溢信科技有限公司）	2001-07-12	2022-03-10	I	65	软件和信息技术服务业	广东省	广州市	黄埔区	广州市高新技术产业开发区科学城科学大道182号创新大厦C3区401室	113.462	23.172
394	毅峰（广州）汽配制造股份有限公司（曾用名：广州市毅峰汽配制造有限公司）	2002-12-26	2021-01-20	C	36	汽车制造业	广东省	广州市	花都区	广州市花都区秀全街岭东路22号	113.152	23.3655
395	广州市英途信息软件股份有限公司（曾用名：广州市英途信息技术有限公司）	2009-03-16	2021-02-02	I	65	软件和信息技术服务业	广东省	广州市	黄埔区	广州市黄埔区科学大道33号A座202、203、204、209、210房	113.432	23.1725
396	广州市尤特新材料有限公司	2003-06-26	2022-04-25	C	32	有色金属冶炼和压延加工业	广东省	广州市	花都区	广州市花都区花山镇华侨科技工业园华辉路4号	113.292	23.4588
397	广州市宇阳数码科技有限公司	2005-06-20	2024-02-26	I	65	软件和信息技术服务业	广东省	广州市	天河区	广州市天河区思成路1号3号自编北塔506房（仅限办公）	113.423	23.1784
398	广州市粤峰高新技术股份有限公司（曾用名：广州市粤峰通讯科技有限公司）	2004-09-22	2020-11-05	M	73	研究和试验发展	广东省	广州市	天河区	广州市天河区思成路23号宏太智慧谷七号楼2楼201（自编220）房	113.423	23.18
399	广州市云景信息科技有限公司	2010-09-16	2023-11-24	M	73	研究和试验发展	广东省	广州市	天河区	广州市天河区软件路17号G2栋7楼706房	113.421	23.1784
400	广州市蕴力信息科技有限公司	2006-10-19	2024-03-20	I	65	软件和信息技术服务业	广东省	广州市	天河区	广州市天河区车陂祠堂大街2号全部（部位：316房）	113.406	23.1274
401	广州市住邦建材发展有限公司	2006-08-31	2023-02-28	C	33	金属制品业	广东省	广州市	花都区	广州市花都区花东镇高信二路4号（机场高新科技产业园内）	113.375	23.4524
402	广州市紫曦企业管理有限公司	2010-05-17	2022-06-14	L	72	商务服务业	广东省	广州市	黄埔区	广州市黄埔区开泰大道8号907房	113.456	23.1736
403	广东树华智慧环保系统有限公司（曾用名：广州树华环保设备有限公司）	2006-11-13	2022-03-18	M	73	研究和试验发展	广东省	广州市	海珠区	广州市海珠区敦和路189号大院门口展厅二层(仅限办公用途)	113.326	23.0941
404	广州数园网络有限公司	2000-04-25	2021-06-11	I	64	互联网和相关服务	广东省	广州市	天河区	广州市天河区五山路381号华南理工大学科技实业总厂（仅限办公用途）	113.352	23.1561
405	广州数字方舟信息技术股份有限公司（曾用名：广州数字方舟信息技术有限公司）	2013-07-30	2023-10-27	M	73	研究和试验发展	广东省	广州市	黄埔区	广州市黄埔区彩频路16号1栋304房	113.443	23.1673
406	广州思创科技股份有限公司（曾用名：广州思创科技发展有限公司）	1996-01-29	2023-09-27	M	75	科技推广和应用服务业	广东省	广州市	黄埔区	广州市黄埔区枝山路13号A11栋701	113.493	23.148
407	广州思迈特软件有限公司	2011-11-14	2024-03-27	I	65	软件和信息技术服务业	广东省	广州市	天河区	广州市天河区高普路136号华天时代305	113.417	23.1786
408	广州四方华能电网控制系统有限公司	2008-09-09	2023-10-16	C	38	电气机械和器材制造业	广东省	广州市	黄埔区	广州市白云区罗冲围松南路松鹤街25号102铺	113.232	23.1579
409	广州四三九九信息科技有限公司	2011-01-24	2022-04-28	M	73	研究和试验发展	广东省	广州市	天河区	广州市黄埔大道东840号保利鱼珠港G3栋	113.357	23.1305
410	广州速昇信息技术有限公司	2009-03-23	2020-04-28	I	65	软件和信息技术服务业	广东省	广州市	黄埔区	广州市黄埔区科学大道50号1701、1702、1703、1704房博氪产业创新中心1701办公卡位047（仅限办公）	113.437	23.1707
411	广州索答信息科技有限公司	2009-04-20	2023-01-04	M	73	研究和试验发展	广东省	广州市	黄埔区	广州高新技术产业开发区科学城天泰一路1号第四层自编431房	113.469	23.1659
412	广州索诺星信息科技有限公司	2011-05-16	2021-12-06	M	73	研究和试验发展	广东省	广州市	黄埔区	广州市黄埔区崖鹰石路27号自编三栋五楼504房	113.447	23.1874
413	广州淘创网络科技有限公司	2021-06-22	2024-01-09	I	64	互联网和相关服务	广东省	广州市	天河区	广州市天河区岑村圣堂大街14号B座三层B036房	113.39	23.1731
414	广州腾世智能控制系统有限公司	2013-11-06	2021-09-10	C	38	电气机械和器材制造业	广东省	广州市	南沙区	广州市南沙区市南公路1219号3栋501室	113.429	22.8991
415	广州天科生物科技有限公司	2005-07-05	2024-04-02	C	26	化学原料和化学制品制造业	广东省	广州市	花都区	广州市花都区花东镇湾弓塘居委会老虎头1号	113.309	23.419
416	广州天懋信息系统股份有限公司（曾用名：广州天懋信息系统有限公司）	2002-04-12	2024-04-03	I	65	软件和信息技术服务业	广东省	广州市	天河区	广州市天河区体育东路140-148号四楼自编编号403房	113.336	23.1448
417	广州天逸电子有限公司	1999-06-28	2020-11-10	C	39	计算机、通信和其他电子设备制造业	广东省	广州市	番禺区	广州市番禺区大石街鸿盛三路1号2栋701室	113.301	23.0153
418	广州天源信息科技股份有限公司（曾用名：广州天源信息科技有限公司）	2001-11-16	2021-05-26	M	73	研究和试验发展	广东省	广州市	天河区	广州市天河区高普路1023号201室、202室	113.42	23.179
419	广州天越电子科技有限公司	2004-03-08	2023-02-15	C	39	计算机、通信和其他电子设备制造业	广东省	广州市	黄埔区	广州高新技术产业开发区香山路3号401	113.444	23.1789
420	广州同望科技发展有限公司	2008-10-27	2018-06-13	M	73	研究和试验发展	广东省	广州市	天河区	广州市天河区龙口中路201号2009房	113.349	23.1459
421	广州同鑫科技有限公司	2003-10-20	2023-01-03	M	75	科技推广和应用服务业	广东省	广州市	海珠区	广州市海珠区新港西路135号大院园西区705号楼中大科技园B座自编号606室（仅限办公）	113.297	23.0994
422	广东启迪图卫科技股份有限公司（曾用名：广州图卫科技股份有限公司）	2007-10-22	2023-09-25	M	75	科技推广和应用服务业	广东省	广州市	番禺区	广州市番禺区番禺大道北555号番禺节能科技园天安科技创新大厦416单位	113.373	22.9848
423	广州万丈网络科技有限公司	2020-10-30	2023-11-03	I	64	互联网和相关服务	广东省	广州市	黄埔区	广州市黄埔区峻文街3号A10栋308房	113.487	23.1875
424	广州网文三维数字技术有限公司	2007-04-09	2020-08-17	M	73	研究和试验发展	广东省	广州市	天河区	广州市天河区高普路1023号1楼101室自编02房（仅限办公）	113.42	23.179
425	广州帷策智能科技有限公司	2008-08-22	2024-03-21	M	73	研究和试验发展	广东省	广州市	天河区	广州市天河区体育东路136,138号1405单元（即自编梯15楼05单元）（仅限办公）	113.373	23.1403
426	广州沃邦生物科技有限公司	2012-05-15	2022-06-24	M	73	研究和试验发展	广东省	广州市	黄埔区	广州高新技术产业开发区科珠路232号3栋301房	113.445	23.1763
427	广州西门子能源变压器有限公司（曾用名：广州西门子变压器有限公司）	1997-11-03	2024-04-07	C	38	电气机械和器材制造业	广东省	广州市	黄埔区	广州市黄埔区骏功路26号	113.524	23.138
428	铭昊汽车金属零部件（广州）有限公司（曾用名：广州小出钢管有限公司）	2005-11-02	2024-01-03	C	36	汽车制造业	广东省	广州市	增城区	广州增城市增江街东区高科技工业基地厂房A3	113.856	23.2755
429	广州新龙浩工业设备有限公司	2003-06-11	2023-01-13	C	34	通用设备制造业	广东省	广州市	番禺区	广州市番禺区新造镇智港大街15号1201室	113.424	23.0419
430	广州鑫界数字科技有限公司	2023-07-06	2023-07-06	I	65	软件和信息技术服务业	广东省	广州市	黄埔区	广州市黄埔区凤湖四路穗科街5号广州知识城国际领军人才聚集区A02栋第5层510房	113.559	23.3297
431	广州信盛通信科技有限公司（曾用名：广州信盛通信设备有限公司）	2005-08-16	2023-08-01	M	74	专业技术服务业	广东省	广州市	白云区	广州市白云区大纲领越秀工业园街10号3栋101室	113.362	23.3604
432	广州信维电子科技股份有限公司（曾用名：广州信维电子科技有限公司）	2005-09-02	2022-10-11	C	39	计算机、通信和其他电子设备制造业	广东省	广州市	黄埔区	广州市黄埔区瑞吉二街45号601、602、701、702、703、704、801、802、803、901、902、903、904房	113.487	23.1875
433	广州星柯蓝信息科技有限公司	2011-06-03	2020-08-13	M	73	研究和试验发展	广东省	广州市	天河区	广州市天河区高普路1025号3楼301室（仅限办公用途）	113.419	23.179
434	广州迅云教育科技有限公司	2012-04-06	2022-12-06	M	73	研究和试验发展	广东省	广州市	番禺区	广州市番禺区东环街迎星东路143号星力动漫游戏产业园B9、B11、B13号	113.382	22.9766
435	广州亚帝实业有限公司	2005-04-05	2024-03-26	C	21	家具制造业	广东省	广州市	海珠区	广州市海珠区新滘中路20号之二101、之三101、之三201、202（仅限办公）	113.322	23.0823
436	广州研华环境科技有限公司	2000-08-24	2020-04-01	M	73	研究和试验发展	广东省	广州市	黄埔区	广州市萝岗区科学大道182号C2区702	113.461	23.172
437	广州洋基信息科技有限公司	2006-07-17	2022-02-08	I	64	互联网和相关服务	广东省	广州市	天河区	广州市天河区白沙水路69号五楼501室（仅限办公）（不可作厂房使用）	113.356	23.1831
438	广州伊创科技股份有限公司（曾用名：广州伊创仪器有限公司）	2007-08-10	2022-05-31	M	75	科技推广和应用服务业	广东省	广州市	番禺区	广州市番禺区石碁镇金山大道南华创动漫产业园B2栋	113.432	22.9993
439	广州宜诚数字医疗系统有限公司	2006-03-15	2021-01-26	M	73	研究和试验发展	广东省	广州市	黄埔区	广州高新技术产业开发区彩频路9号902C、902D	113.443	23.1684
440	广州亿程交通信息有限公司	2003-11-06	2022-02-11	M	73	研究和试验发展	广东省	广州市	番禺区	广州市番禺区石碁镇亚运大道1003号3号楼604、605、606号	113.453	22.9457
441	广州亦高电气设备有限公司	2006-11-17	2023-11-27	C	38	电气机械和器材制造业	广东省	广州市	从化区	广东从化经济开发区龙洞路4号	113.51	23.4484
442	广州易茂科技发展有限公司	2000-08-08	2018-06-13	M	73	研究和试验发展	广东省	广州市	天河区	广州市天河区黄埔大道西76号富力盈隆广场2901单元	113.333	23.1324
443	广州易胜信息科技有限公司	2003-07-28	2021-08-20	M	74	专业技术服务业	广东省	广州市	天河区	广州市天河区元岗北街91号之三2楼206室C21（仅限办公）	113.346	23.1853
444	广州益方田园环保股份有限公司	2001-07-24	2016-08-31	M	74	专业技术服务业	广东省	广州市	黄埔区	广州市萝岗区科学大道科汇发展中心科汇一街11号201房	113.442	23.1732
445	广州逸信电子科技有限公司	2005-04-11	2017-08-28	M	73	研究和试验发展	广东省	广州市	黄埔区	广州高新技术产业开发区科学大道33号五栋3层之301、302、303、305、306、307	113.304	23.1477
446	广州翼锋信息科技有限公司	2003-06-26	2023-10-09	I	65	软件和信息技术服务业	广东省	广州市	天河区	广州市天河区黄埔大道西120号2801房（部位：自编C房）（仅限办公）（不可作厂房使用）	113.346	23.1316
447	广州英码信息科技有限公司	2006-11-02	2023-12-15	M	73	研究和试验发展	广东省	广州市	黄埔区	广州市黄埔区高新技术产业开发区科学城科研路3号自编A2栋321房（仅限办公）	113.447	23.176
448	广州英融计算机科技有限公司	2003-03-14	2023-11-09	I	65	软件和信息技术服务业	广东省	广州市	天河区	广州市天河区中山大道西140号1927房（部位：之一）（仅限办公）	113.365	23.1399
449	广州盈光科技股份有限公司	2002-04-21	2022-06-02	C	39	计算机、通信和其他电子设备制造业	广东省	广州市	黄埔区	广州市黄埔区彩频路9号1102-2房	113.443	23.1684
450	广州永日电梯有限公司	1993-05-18	2021-10-20	C	34	通用设备制造业	广东省	广州市	花都区	广州市花都区花都沿江大道24号	113.13	23.3566
451	广州优的新能源科技有限公司	2011-07-18	2018-03-27	M	73	研究和试验发展	广东省	广州市	番禺区	广州市番禺区番禺大道北555号番禺节能科技园内天安科技创业中心304之一	113.371	22.9852
452	广州由我科技股份有限公司（曾用名：广州由我电子科技有限公司）	2006-11-13	2023-12-29	C	39	计算机、通信和其他电子设备制造业	广东省	广州市	番禺区	广州市番禺区大石街石北路644号巨大创意产业园15栋4层08号	113.294	23.0207
453	广州元曜软件有限公司	2011-06-30	2023-03-07	M	73	研究和试验发展	广东省	广州市	天河区	广州市天河区龙口东路354号403自编A房	113.347	23.1488
454	万辉（广州）高新材料有限公司（曾用名：广州源辉化工有限公司）	2009-03-12	2020-12-15	C	26	化学原料和化学制品制造业	广东省	广州市	增城区	广州市增城区中新镇福和三迳村福中路51号（A1办公楼、G1技术开发楼1、C2甲类车间2）	113.638	23.3326
455	广州远程教育中心有限公司	2002-11-29	2022-11-30	P	83	教育	广东省	广州市	越秀区	广州市越秀区麓景西路41号广州市广播电视大学校区6号楼6－7层	113.282	23.152
456	广州远大信息发展有限公司	1999-06-01	2019-10-31	M	73	研究和试验发展	广东省	广州市	越秀区	广州市越秀区先烈中路83号501自编之十五房（仅限办公用途）	113.306	23.1479
457	广州粤晖金属机械防护技术有限公司	2002-01-08	2019-03-11	M	73	研究和试验发展	广东省	广州市	海珠区	广州市海珠区新港东路3号65栋201（仅作写字楼功能用）	113.389	23.1046
458	广州粤能电力科技开发有限公司	1993-02-22	2023-05-11	M	73	研究和试验发展	广东省	广州市	越秀区	广州市越秀区环市东路500号幸运阁13楼	113.315	23.1401
459	广州粤显光学仪器有限责任公司	2004-09-15	2023-04-10	C	40	仪器仪表制造业	广东省	广州市	越秀区	广州市越秀区淘金北路81号	113.292	23.1488
460	云宏信息科技股份有限公司（曾用名：广州云宏信息科技股份有限公司）	2010-04-15	2023-12-27	I	65	软件和信息技术服务业	广东省	广州市	白云区	广州市白云区龙归街科泰二路13-19号白云高新区·产业创新园13号1栋4层401-151房	113.325	23.3044
461	广州云金地数码科技有限公司	2003-03-20	2016-09-27	M	73	研究和试验发展	广东省	广州市	天河区	广州市天河区高唐新建区高普路1035号2层东01（本住所限写字楼功能）	113.418	23.1784
462	广州增立钢管结构股份有限公司	2004-02-09	2023-11-09	C	33	金属制品业	广东省	广州市	增城区	广州市增城区新城大道400号增城低碳总部园新城创业中心13号楼1801、1802、1803、1804	113.834	23.2384
463	广东真迪科教设备有限公司（曾用名：广州真迪科教仪器设备有限公司）	2009-03-03	2023-12-15	C	40	仪器仪表制造业	广东省	广州市	番禺区	广州市番禺区东环街番禺大道北555号天安总部中心25号楼1705房	113.381	22.9849
464	广州臻韵科技股份有限公司（曾用名：广州臻韵香料有限公司）	2012-09-06	2018-08-08	M	73	研究和试验发展	广东省	广州市	黄埔区	广州高新技术产业开发区科学城掬泉路3号广州国际企业孵化器B区B402房	113.454	23.1685
465	广州智丰电气科技有限公司	2012-02-08	2023-09-07	C	38	电气机械和器材制造业	广东省	广州市	黄埔区	广州市海珠区新港西路135号大院园西区705号楼中大科技园B座自编号1812,1813,1814室（仅限办公）	113.297	23.0994
466	广州智讯通信系统有限公司	1996-03-26	2020-12-07	C	39	计算机、通信和其他电子设备制造业	广东省	广州市	海珠区	广州市海珠区赤岗西路265号1号楼自编110室	113.33	23.0953
467	广州中大百迅信息技术有限公司	2004-06-28	2022-07-05	M	73	研究和试验发展	广东省	广州市	越秀区	广州市越秀区先烈中路80号汇华商贸大厦5层501单元自编F016号	113.302	23.1426
468	广州中大环境治理工程有限公司	2003-12-01	2024-01-31	M	73	研究和试验发展	广东省	广州市	海珠区	广州市越秀区中山二路74号	113.295	23.1328
469	广州中大凯旋电子科技有限公司	2007-04-28	2024-02-20	M	73	研究和试验发展	广东省	广州市	海珠区	广州市番禺区小谷围街青蓝街26号202-204	113.393	23.0628
470	广州中大中鸣科技有限公司	1991-11-21	2023-12-05	M	73	研究和试验发展	广东省	广州市	越秀区	广州市海珠区新港西路135号大院园西区705号楼中大科技园B座自编号1611,1612,1613房（仅限办公用途）	113.297	23.0994
471	广州中卡智能科技有限公司	2008-05-19	2023-06-15	M	73	研究和试验发展	广东省	广州市	天河区	广州市天河区岑村樟木山12号401房	113.395	23.1616
472	中科检测技术服务（广州）股份有限公司（曾用名：广州中科检测技术服务有限公司）	2011-03-07	2024-04-09	M	74	专业技术服务业	广东省	广州市	天河区	广州市天河区兴科路368号	113.368	23.1796
473	广州中软信息技术有限公司	1996-11-27	2023-12-04	I	65	软件和信息技术服务业	广东省	广州市	天河区	广州市天河区科韵路16号广州信息港C2栋8层	113.379	23.1313
474	广州中宇冷气科技发展有限公司	1997-01-16	2023-04-21	M	73	研究和试验发展	广东省	广州市	从化区	广州市从化鳌头镇棋杆岭南村古塘自然村&ldquo;三夫田&rdquo;地段	113.533	23.5749
475	广州运通科金技术有限公司（曾用名：广州中智融通金融科技有限公司）	2012-12-01	2024-01-30	M	73	研究和试验发展	广东省	广州市	黄埔区	广州市高新技术产业开发区科学城科林路9号	113.452	23.1485
476	浩蓝环保股份有限公司	2000-10-09	2024-01-09	N	77	生态保护和环境治理业	广东省	广州市	黄埔区	广州市黄埔区（中新知识城）凤凰四路99号A栋619房	113.503	23.3921
477	华南理工大学建筑设计研究院有限公司	1984-10-01	2023-07-04	M	74	专业技术服务业	广东省	广州市	天河区	广州市天河区华南理工大学设计院楼内	113.355	23.1612
478	嘉媚乐化妆品有限公司	2008-12-25	2021-07-01	M	73	研究和试验发展	广东省	广州市	天河区	广州市天河区体育西路103号之一2101房（不可作厂房使用）	113.327	23.1408
479	建滔（广州）电子材料制造有限公司（曾用名：建滔（番禺南沙）石化有限公司）	2000-01-18	2022-04-24	C	26	化学原料和化学制品制造业	广东省	广州市	南沙区	广州市南沙区南沙街环市大道北9号（办公楼）（仅限办公）	113.591	22.7699
480	金中天建设集团有限公司（曾用名：金中天集团建设有限公司）	2006-01-16	2022-04-14	E	47	房屋建筑业	广东省	广州市	黄埔区	广东省广州市黄埔区光谱中路11号2栋1单元1103室	113.451	23.1655
481	京信通信系统（广州）有限公司	1997-01-03	2018-12-04	I	63	电信、广播电视和卫星传输服务	广东省	广州市	黄埔区	广州经济技术开发区金碧路6号。	113.526	23.057
482	广东晶科电子股份有限公司（曾用名：晶科电子（广州）有限公司）	2006-08-30	2024-03-21	C	39	计算机、通信和其他电子设备制造业	广东省	广州市	南沙区	广州市南沙区环市大道南33号	113.571	22.7588
483	精诚瑞宝计算机系统有限公司	2001-03-16	2023-12-18	M	73	研究和试验发展	广东省	广州市	天河区	广州市天河区中山大道西89号A栋13层北13-17、南17-23号	113.363	23.1413
484	骏升科技（中国）有限公司	1992-08-15	2022-03-24	C	39	计算机、通信和其他电子设备制造业	广东省	广州市	番禺区	广州市番禺区钟村镇市广路钟二路段45号	113.358	22.9681
485	马瑞利汽车电子（广州）有限公司	1995-10-30	2023-04-04	M	73	研究和试验发展	广东省	广州市	花都区	广州市花都区永利路2号整幢	113.247	23.3649
486	瑞辰星生物技术（广州）有限公司	2011-01-26	2023-06-02	M	73	研究和试验发展	广东省	广州市	黄埔区	广州市黄埔区开源大道11号B5栋第一层至第二层	113.502	23.1594
487	赛铂（广州）机电科技有限公司	2012-10-24	2020-02-26	C	35	专用设备制造业	广东省	广州市	黄埔区	广州经济技术开发区玉树工业园敬业三街9号B栋102房	113.438	23.1619
488	尚阳科技有限公司	2002-12-11	-	I	65	软件和信息技术服务业	广东省	广州市	天河区	广州市天河区华观路1933号万科云广场A栋610房（仅限办公用途）	113.411	23.1734
489	天翼爱音乐文化科技有限公司	2013-06-09	2024-03-21	R	88	文化艺术业	广东省	广州市	黄埔区	广州市黄埔区光谱中路23号A1栋1楼102号房	113.462	23.1646
490	长兴（广州）电子材料有限公司	2001-03-26	2022-08-11	C	39	计算机、通信和其他电子设备制造业	广东省	广州市	黄埔区	广州市经济技术开发区东区东鹏大道69号	113.531	23.1339
491	广州中船文冲船坞有限公司（曾用名：中船澄西船舶（广州）有限公司）	2005-11-24	2020-03-24	C	37	铁路、船舶、航空航天和其他运输设备制造业	广东省	广州市	南沙区	广州市南沙区龙穴街启航路10号	113.67	22.6824
492	中船黄埔文冲船舶有限公司	1981-06-01	2023-12-14	C	37	铁路、船舶、航空航天和其他运输设备制造业	广东省	广州市	黄埔区	广州市黄埔区长洲街	113.427	23.0827
493	中国能源建设集团广东火电工程有限公司	1986-05-12	2023-07-31	E	49	建筑安装业	广东省	广州市	黄埔区	广东省广州市黄埔区红荔路2号	113.504	23.0904
494	中国轻工业广州工程有限公司	2003-01-02	2023-10-11	E	48	土木工程建筑业	广东省	广州市	番禺区	广州市番禺区创启路63号创新科技园A9号楼	113.466	22.9833
495	中经汇通电子商务有限公司	2012-02-15	2020-11-20	I	64	互联网和相关服务	广东省	广州市	黄埔区	广州市黄埔区科学大道112号906房	113.438	23.17
496	中科院广州电子技术有限公司	2001-12-30	2024-01-30	C	40	仪器仪表制造业	广东省	广州市	越秀区	广州市越秀区先烈中路100号大院23号	113.306	23.1455
497	中科院广州化灌工程有限公司	1993-08-19	2023-12-28	E	48	土木工程建筑业	广东省	广州市	天河区	广州市天河区兴科路368号实验楼壹楼133-136房	113.368	23.1796
498	中石化广州工程有限公司	1998-06-16	2023-07-11	M	74	专业技术服务业	广东省	广州市	天河区	广州市天河区体育西路191号A塔3301房（仅限办公用途）	113.327	23.1464
499	中铁城建集团第二工程有限公司	2000-07-27	2023-04-07	E	47	房屋建筑业	广东省	广州市	南沙区	广州市南沙区丰泽西路华飞街2号6号楼6-503室	113.525	22.8073
500	中铁建港航局集团勘察设计院有限公司	1999-09-07	2022-01-10	M	74	专业技术服务业	广东省	广州市	南沙区	广州市南沙区黄阁镇华飞街2号403房、406房（仅限办公）	113.522	22.8275
501	广东达元绿洲食品安全科技股份有限公司	2006-04-26	2023-10-12	M	73	研究和试验发展	广东省	广州市	黄埔区	广州市高新技术产业开发区科学城开源大道11号A2栋第三层	113.502	23.1594
502	广东恒定检测技术有限公司	2010-11-22	2019-03-12	M	74	专业技术服务业	广东省	广州市	海珠区	广州经济技术开发区科学城彩频路7号之一102A房	113.442	23.1691
503	广东京豪生物制药有限公司（曾用名：广东京豪医药科技开发有限公司）	1999-02-11	2023-11-09	C	27	医药制造业	广东省	广州市	天河区	广州市天河区广州大道中988号2205房（自编23层）E21房（仅限办公）（不可作厂房使用）	113.373	23.1403
504	立高食品股份有限公司（曾用名：广东立高食品有限公司）	2000-05-11	2022-02-14	C	14	食品制造业	广东省	广州市	增城区	广州市增城石滩镇工业园平岭工业区	113.801	23.1739
505	广东纽恩泰新能源科技发展有限公司	2008-12-01	-	C	34	通用设备制造业	广东省	广州市	增城区	广州市增城新塘镇创优路125号（增城经济技术开发区核心区内）	113.636	23.1939
506	广东惟一水务工程有限公司	2004-07-02	2021-02-23	E	50	建筑装饰、装修和其他建筑业	广东省	广州市	天河区	广州市天河区黄埔大道路163号19K房（仅限办公）	113.332	23.1335
507	广东新船重工有限公司	2013-01-09	2023-09-27	C	37	铁路、船舶、航空航天和其他运输设备制造业	广东省	广州市	南沙区	广州市南沙区黄阁镇小虎北二路2号	113.535	22.8749
508	广东友元国土信息工程有限公司	2004-06-10	2022-04-19	N	79	土地管理业	广东省	广州市	天河区	广州市天河区能源路4号1001室1002室（仅限办公）	113.353	23.1706
509	广东珍奇味集团有限公司	2000-05-16	2016-06-20	C	13	农副食品加工业	广东省	广州市	从化区	广州市从化经济开发区福从路15号	113.509	23.4543
510	广州安必平自动化检测设备有限公司	2011-03-24	2021-08-31	M	73	研究和试验发展	广东省	广州市	黄埔区	广州市黄埔区科信街2号2栋B座301房（仅限办公）	113.43	23.1779
511	广州安电测控技术有限公司	2012-03-05	2024-03-26	C	40	仪器仪表制造业	广东省	广州市	天河区	广州市天河区棠安路288号1028、1029房（不可作厂房使用）	113.383	23.142
512	广州奔桥建筑科技有限公司	2013-08-24	2024-03-04	M	73	研究和试验发展	广东省	广州市	天河区	广州市天河区燕岭路95号1604房	113.335	23.1669
513	广州传悦网络科技有限公司	2011-12-02	2024-01-10	M	73	研究和试验发展	广东省	广州市	天河区	广州市天河区珠村北环路100号3栋401-741	113.43	23.1305
514	广州创想云科技有限公司（曾用名：广州创想科技股份有限公司）	1997-05-20	2023-11-27	M	73	研究和试验发展	广东省	广州市	天河区	广州市天河区中山大道西89号4层421房	113.363	23.1409
515	广州大明联合橡胶制品有限公司	2000-02-18	2021-06-11	C	29	橡胶和塑料制品业	广东省	广州市	花都区	广州市花都区茶园里南路东一巷12号412室	113.242	23.3474
516	广州迪奥信息科技有限公司	2012-07-09	2020-01-14	M	73	研究和试验发展	广东省	广州市	天河区	广州市天河区新塘田头岗二路一横路4号B栋302（仅限办公用途）	113.414	23.1582
517	广州东百信息科技有限公司	2010-09-15	2020-12-10	M	73	研究和试验发展	广东省	广州市	海珠区	广州市海珠区新港中路艺影街11号1801房（仅限办公用途）	113.327	23.1019
518	广东广纺检测技术股份有限公司（曾用名：广州纺织服装研究院有限公司）	1987-03-02	2024-04-02	M	74	专业技术服务业	广东省	广州市	黄埔区	广州市黄埔区科研路16号	113.449	23.1765
519	广州宏天软件股份有限公司（曾用名：广州宏天软件有限公司）	2008-07-07	2022-12-16	I	65	软件和信息技术服务业	广东省	广州市	海珠区	广州市海珠区琶洲大道东8号1209房	113.378	23.106
520	广州花海药业股份有限公司	2002-04-08	2019-01-30	C	27	医药制造业	广东省	广州市	黄埔区	广州市经济技术开发区科学城揽月路80号广州科技创新基地C区第六层	113.457	23.1657
521	广州华凯车辆装备有限公司	2006-03-23	2024-01-22	C	36	汽车制造业	广东省	广州市	花都区	广州市花都区炭步镇南街工业区	113.116	23.3344
522	广州华宇信息技术有限公司	2007-09-11	2023-03-30	M	73	研究和试验发展	广东省	广州市	海珠区	广州市海珠区阅江中路688号保利国际广场北塔15层	113.379	23.1094
523	广州欢乐岛康体设备有限公司	2003-12-26	2020-06-02	C	29	橡胶和塑料制品业	广东省	广州市	白云区	广州市白云区江高镇水沥村工业开发区长岭	113.243	23.3177
524	广州霍斯通电气股份有限公司	2001-12-30	2024-01-10	C	38	电气机械和器材制造业	广东省	广州市	黄埔区	广州经济技术开发区宝聚街8号2-5层	113.524	23.0665
525	广州聚合新材料科技股份有限公司（曾用名：广州聚合电子材料有限公司）	2005-12-12	2022-06-29	C	26	化学原料和化学制品制造业	广东省	广州市	黄埔区	广州市黄埔区永和经济区贤堂路12号	113.536	23.2114
526	广州康瑞泰药业有限公司	2012-06-14	2023-11-08	C	27	医药制造业	广东省	广州市	黄埔区	广州市黄埔区开源大道11号A7栋501室	113.502	23.1594
527	广州科联精密机器股份有限公司（曾用名：广州科联精密机器有限公司）	2010-05-19	2023-08-02	C	38	电气机械和器材制造业	广东省	广州市	荔湾区	广州市荔湾区芳村大道西106号之一21	113.222	23.1158
528	广州乐盈信息科技股份有限公司（曾用名：广州乐盈信息科技有限公司）	2013-03-18	2022-11-17	M	73	研究和试验发展	广东省	广州市	天河区	广州市天河区潭村路350号1201房	113.356	23.1309
529	广州力富科技有限公司（曾用名：广州力富视频科技有限公司）	2004-05-31	2023-12-06	M	73	研究和试验发展	广东省	广州市	黄埔区	广州市黄埔区科学大道182号C1栋603房（仅限办公）	113.462	23.1725
530	广东林泽科技股份有限公司（曾用名：广州林泽信息科技有限公司）	2009-08-05	2020-04-21	M	73	研究和试验发展	广东省	广州市	天河区	广州高新技术产业开发区彩频路9号304（仅限办公）	113.442	23.1684
531	广州美录电子有限公司	2008-07-26	2017-04-11	C	39	计算机、通信和其他电子设备制造业	广东省	广州市	番禺区	广州市番禺区大龙街长沙路沙涌村段32号B	113.432	22.9601
532	派莎克（广东）流体设备技术有限公司（曾用名：广州派莎克流体设备技术有限公司）	2011-05-18	2023-02-15	M	75	科技推广和应用服务业	广东省	广州市	花都区	广州市花都区新华街新华工业区红棉大道48号5号厂房（可作厂房使用）	113.176	23.4042
533	广州瑞讯达系统科技有限公司	2000-09-05	2022-08-16	M	73	研究和试验发展	广东省	广州市	天河区	广州市天河区棠东东路3号419室	113.396	23.1322
534	广州施耐电子科技有限公司	2003-04-29	2016-04-25	M	74	专业技术服务业	广东省	广州市	番禺区	广州市番禺区沙头街汀根村大板工业区一街22号6号厂房五楼	113.334	22.9449
535	广州市达瑞生物技术股份有限公司	2003-08-11	2023-09-21	M	73	研究和试验发展	广东省	广州市	黄埔区	广州市高新技术产业开发区荔枝山路6号自编2号404	113.444	23.1852
536	广州市道诺电子科技有限公司	2012-10-25	2023-03-22	M	73	研究和试验发展	广东省	广州市	番禺区	广州市番禺区石碁镇金山村华创动漫产业园华腾路22号6栋401、402单元	113.43	22.999
537	广州德百顺蓝钻科技有限公司（曾用名：广州市德百顺电气科技有限公司）	2011-03-21	2023-11-02	M	73	研究和试验发展	广东省	广州市	黄埔区	广州市黄埔区开源大道11号B4栋801室	113.502	23.1594
538	广州市福立达电器有限公司	2010-11-24	2019-09-05	C	38	电气机械和器材制造业	广东省	广州市	花都区	广州市花都区瑞香路28号104栋（部位：201）	113.171	23.4118
539	广州市光辉塑料包装有限公司	2003-10-13	2017-11-02	C	29	橡胶和塑料制品业	广东省	广州市	花都区	广州市花都区新雅街镜湖大道石塘工业园富源一路自编26号之一	113.254	23.3526
540	广州市金圣斯箱包科技有限公司（曾用名：广州市金圣斯皮具制品有限公司）	2004-05-18	2022-06-07	C	19	皮革、毛皮、羽毛及其制品和制鞋业	广东省	广州市	花都区	广州市花都区狮岭镇阳光路6号三栋四层	113.861	23.1937
541	广州科创云科技股份有限公司（曾用名：广州市科创电脑技术开发有限公司）	1999-05-28	2018-08-27	M	75	科技推广和应用服务业	广东省	广州市	天河区	广州高新技术产业开发区科学城科珠路232号3栋二层自编209、211房	113.445	23.1768
542	广州市科朗电子实业有限公司	2006-02-24	2017-08-15	C	39	计算机、通信和其他电子设备制造业	广东省	广州市	花都区	广州市花都区花东镇珠湖村三角岭	113.338	23.4798
543	灵智自控（广州）股份有限公司（曾用名：广州市灵智自动化系统控制有限公司）	1997-03-10	2023-01-03	I	65	软件和信息技术服务业	广东省	广州市	天河区	广州市天河区高普路1023号401室	113.42	23.179
544	广州市山本机械有限公司	2005-02-01	2021-01-12	C	34	通用设备制造业	广东省	广州市	荔湾区	广州市荔湾区龙溪中路62号第7栋之一、之二、之三	113.215	23.0826
545	广州市顺泽美汽车用品有限公司	2003-08-07	2023-02-24	C	36	汽车制造业	广东省	广州市	花都区	广州市花都区芙蓉镇第二工业区	113.262	23.4044
546	广东唯金智能环境科技有限公司（曾用名：广州市唯金空调科技有限公司）	2007-11-30	2023-09-21	M	73	研究和试验发展	广东省	广州市	南沙区	广州市南沙区市鱼路233号之200号2栋101室	113.424	22.8883
547	广州市万表科技股份有限公司（曾用名：广州市沃祺信息科技有限公司）	2011-07-26	2022-12-19	M	73	研究和试验发展	广东省	广州市	番禺区	广州市番禺区南村镇番禺大道北16号	113.347	23.0134
548	广州市水之道环境科技有限公司（曾用名：广州市新之地生态环境修复有限公司）	2012-09-11	2023-10-23	N	77	生态保护和环境治理业	广东省	广州市	荔湾区	广州市荔湾区花地大道中83号17楼1703室（仅限办公）	113.241	23.0995
549	广州泰成生化科技有限公司	2003-11-05	2024-02-02	M	73	研究和试验发展	广东省	广州市	黄埔区	广州市番禺区石壁街石壁一村谢石公路76号之一16栋203	113.279	23.0069
550	天图控股集团股份有限公司（曾用名：广州天图物流有限公司）	2010-05-28	2023-06-25	L	72	商务服务业	广东省	广州市	从化区	广州市从化区鳌头镇琶江路94号201房自编之一	113.416	23.6711
551	广州鑫桥建筑工程有限公司（曾用名：广州鑫桥建筑劳务有限公司）	2011-04-08	2023-03-14	E	47	房屋建筑业	广东省	广州市	天河区	广州市天河区燕岭路95号1601房	113.335	23.167
552	广州以大计算机科技有限公司	2006-09-22	2022-11-25	I	65	软件和信息技术服务业	广东省	广州市	天河区	广州市天河区龙洞北路321号A10栋305、306、307、308房	113.38	23.2068
553	广州亦云网络科技有限公司	2021-02-09	2022-01-07	I	65	软件和信息技术服务业	广东省	广州市	天河区	广州市天河区奥体南路9号A2栋112-02（仅限办公）	113.419	23.1399
554	广州易尊网络科技股份有限公司（曾用名：广州易尊网络科技有限公司）	2011-03-07	2022-12-23	I	64	互联网和相关服务	广东省	广州市	海珠区	广州市海珠区广州大道南1601-1603号广州创投小镇科技及时尚产业集聚区自编A区37、38、41、42号楼第一、二、三层	113.321	23.0808
555	广州悦世界信息科技有限公司	2013-06-08	2020-06-10	I	64	互联网和相关服务	广东省	广州市	海珠区	广州市海珠区琶洲蟠龙新街3号2401至2411房（仅限办公用途）	113.289	23.1083
556	广州粤昆源生物科技发展有限公司	2006-12-01	2022-09-27	M	75	科技推广和应用服务业	广东省	广州市	海珠区	广州市海珠区新港西路105号自编36栋2楼204房(仅作写字楼功能用，不可作厂房使用)	113.3	23.0986
557	广州云暲信息科技有限公司	-	-	I	65	软件和信息技术服务业	广东省	广州市	天河区	广州市天河区棠安路188号306房	113.384	23.1389
558	广州掌源信息科技有限公司	2011-11-08	2019-12-17	M	73	研究和试验发展	广东省	广州市	天河区	广州市天河区华庭路4号201之06之2B03房	113.336	23.1505
559	广州中汉口腔用品有限公司	2000-03-13	2020-09-07	C	26	化学原料和化学制品制造业	广东省	广州市	白云区	广州市白云区江高镇神山工业园振华北路86号	113.2	23.3447
560	汇通宝支付有限责任公司	2001-06-20	2020-11-06	J	69	其他金融业	广东省	广州市	南沙区	广州市天河区天慧路16号	113.427	23.1862
561	赛沃纳如（广州）乳胶制品科技有限公司	1997-12-30	2023-02-16	C	19	皮革、毛皮、羽毛及其制品和制鞋业	广东省	广州市	黄埔区	广州市黄埔区花轮一路2号，永和金融大楼8楼801-803（仅限办公）	113.569	23.2012
562	广州市好上好装饰材料制造有限公司	2002-04-26	2022-01-18	C	21	家具制造业	广东省	广州市	黄埔区	广州市黄埔区水西路193号1604房	113.49	23.1974
563	广州市浩洋电子股份有限公司（曾用名：广州市浩洋电子有限公司）	2005-03-17	2023-06-02	C	39	计算机、通信和其他电子设备制造业	广东省	广州市	番禺区	广州市番禺区石碁镇海涌路109号（厂房）	113.457	22.9583
564	广东浩云长盛网络股份有限公司（曾用名：广州市浩云计算机科技有限公司）	2013-04-11	2023-03-15	I	65	软件和信息技术服务业	广东省	广州市	天河区	广州市天河区建中路6，8号2楼	113.378	23.1327
565	广州市恒灏天环保科技有限公司	2014-04-24	2022-08-19	M	73	研究和试验发展	广东省	广州市	海珠区	广州市海珠区新港东路2433号整栋自编1112房（仅限办公）	113.406	23.1025
566	广州市华绿环保科技有限公司	2009-08-25	2021-07-12	M	73	研究和试验发展	广东省	广州市	黄埔区	广州市黄埔区科学大道112号208房	113.438	23.1695
567	广州市华南畜牧设备有限公司	2008-01-23	2023-09-27	C	34	通用设备制造业	广东省	广州市	白云区	广州市白云区钟落潭镇广从九路789号	113.464	23.4092
568	广州市华懋科技发展有限公司	2000-05-24	2023-12-01	I	65	软件和信息技术服务业	广东省	广州市	南沙区	广州市天河区临江大道681号213室（仅限办公）	113.38	23.118
569	广州市华颉电子科技有限公司	2003-09-04	2023-04-13	M	73	研究和试验发展	广东省	广州市	黄埔区	广州市黄埔区科学大道162号B1栋605房	113.458	23.1706
570	广州市汇泰隆铝制品有限公司	2002-01-31	2023-03-08	C	33	金属制品业	广东省	广州市	花都区	广州市花都区花东镇凤凰工业区	113.347	23.4308
571	广州市积光电子有限公司	2012-12-11	2023-12-13	C	39	计算机、通信和其他电子设备制造业	广东省	广州市	番禺区	广州市番禺区南村镇南里路91号9栋102铺	113.373	22.9988
572	广州市嘉诚国际物流股份有限公司	2000-10-24	2024-01-24	G	58	多式联运和运输代理业	广东省	广州市	番禺区	广州市番禺区南村镇万博二路79号2202室	113.356	23.0131
573	广州市坚信信息科技有限公司	2014-03-08	2023-06-13	M	73	研究和试验发展	广东省	广州市	黄埔区	广州市越秀区广州大道中599号第八层818单元	113.333	23.2139
574	广东健齿生物科技有限公司（曾用名：广州市健齿生物科技有限公司）	2013-04-11	2023-12-19	M	75	科技推广和应用服务业	广东省	广州市	南沙区	广州市南沙区南沙街金隆路37号101-103房（不可作厂房）	113.553	22.7992
575	广州市建凌电器有限公司	2010-11-30	2016-11-23	C	38	电气机械和器材制造业	广东省	广州市	从化区	广州市从化明珠工业园区吉祥一路3号	113.533	23.6205
576	金锐（广东）新材料股份有限公司（曾用名：广州市金锐金刚石工具有限公司）	2005-05-10	2022-09-27	C	35	专用设备制造业	广东省	广州市	番禺区	广州市番禺区石基镇金山村华创动漫产业园C28号	113.428	23.0007
577	广州市金数通信技术有限公司	2008-02-19	2021-08-10	M	73	研究和试验发展	广东省	广州市	海珠区	广州市海珠区敦和路189号2栋303室（仅限办公）	113.326	23.0941
578	广州市晶华精密光学股份有限公司	1997-02-05	2023-12-21	C	39	计算机、通信和其他电子设备制造业	广东省	广州市	黄埔区	广州市黄埔区云埔工业区东诚片康达路12号	113.547	23.1317
579	广州市晶密电子有限公司	2003-06-30	2023-12-04	C	39	计算机、通信和其他电子设备制造业	广东省	广州市	花都区	广州市花都区新雅街迎春路马来西亚工业园自编3栋三、四层	113.262	23.357
580	广州市聚星源科技有限公司	1999-03-19	2024-04-01	M	73	研究和试验发展	广东省	广州市	黄埔区	广州高新技术产业开发区科学城科汇四街1号601房	113.444	23.1734
581	广东省巨宏光电有限公司（曾用名：广州市巨宏光电有限公司）	2009-07-07	2023-07-19	C	38	电气机械和器材制造业	广东省	广州市	番禺区	广州市番禺区大石街官坑村石中三路9号5栋301铺	113.285	23.0154
582	广东巨科环保技术有限公司（曾用名：广州市巨科环保工程有限公司）	2012-07-23	2023-12-06	M	75	科技推广和应用服务业	广东省	广州市	番禺区	广州市番禺区钟村街雄峰北大街11号（雄峰北大街11号G-1）2111、2112房	113.402	23.0172
583	广州市巨龙印制板设备有限公司	1998-11-30	2023-08-28	C	39	计算机、通信和其他电子设备制造业	广东省	广州市	花都区	广州市花都区狮岭镇山前旅游大道旗新村路段	113.223	23.4789
584	广东炬海科技股份有限公司（曾用名：广州市炬海软件科技有限公司）	2006-09-20	2024-03-21	I	65	软件和信息技术服务业	广东省	广州市	黄埔区	广州市黄埔区中山大道东280-1号华盈商厦202室（自主申报）	113.507	23.0905
585	广州市凯米瑞化肥有限公司	2007-04-11	2022-11-15	C	26	化学原料和化学制品制造业	广东省	广州市	南沙区	广州市南沙区东涌镇大稳村稳发路999号	113.447	22.883
586	广州市科奥机电有限公司	2002-09-12	2020-07-28	C	38	电气机械和器材制造业	广东省	广州市	番禺区	广州市番禺区南村镇坑头工业区西线路28号112	113.4	22.9947
587	广州市科普会计信息有限公司	2012-06-04	2022-06-24	M	73	研究和试验发展	广东省	广州市	海珠区	广州市海珠区昌岗东路271号103铺（仅限办公）	113.288	23.0995
588	广州市科锐达光电技术股份有限公司（曾用名：广州市科锐达光电技术有限公司）	2010-04-21	2023-05-10	M	73	研究和试验发展	广东省	广州市	花都区	广州市花都区新雅街东莞村华兴北路60号	113.25	23.3521
589	广州市昆诺环保科技有限公司	2010-11-05	2021-09-14	M	73	研究和试验发展	广东省	广州市	番禺区	广州市番禺区大龙街新桥泰安路35号三栋3楼、4楼	113.429	22.9519
590	广州市蓝本影音科技有限公司	2003-04-01	2018-04-25	M	73	研究和试验发展	广东省	广州市	番禺区	广州市番禺区沙头街禺山西路329号4座1栋701	113.348	22.9437
591	广州市雷迪照明灯具有限公司	2010-04-09	2023-10-24	C	38	电气机械和器材制造业	广东省	广州市	番禺区	广州市番禺区石碁镇金山村华腾路22号华创动漫产业园二期6栋401单元	113.432	22.9971
592	广州市力琪金属制品有限公司	2006-07-26	2024-03-21	C	33	金属制品业	广东省	广州市	花都区	广州市花都区炭步镇炭步工业园宝珠路南侧	113.094	23.3558
593	广州市联冠机械有限公司	2003-06-05	2022-06-17	C	35	专用设备制造业	广东省	广州市	番禺区	广州市番禺区大龙街新桥泰安路西六横街4号	113.423	22.9569
594	广州市亮艺照明设备有限公司	2010-05-31	2021-11-29	C	38	电气机械和器材制造业	广东省	广州市	花都区	广州市花都区望岗路2号3栋301铺（部位：304铺）	113.204	23.3782
595	广州市菱朗电子科技有限公司	2002-08-06	2023-07-11	C	38	电气机械和器材制造业	广东省	广州市	天河区	广州市天河区柯木塱杨梅岭街3号B座609房	113.42	23.1897
596	广州市络捷生物科技有限公司	2011-05-06	2022-11-23	M	73	研究和试验发展	广东省	广州市	黄埔区	广州高新技术产业开发区揽月路80号广州创新基地B区第二层201-202单元	113.458	23.1659
597	广州市明师教育服务股份有限公司	2005-06-16	2021-06-15	P	83	教育	广东省	广州市	海珠区	广州市海珠区昌岗中路熙园街2号103、201、302房	113.28	23.0921
598	广州市南大实业有限公司	1997-10-14	2022-11-03	C	26	化学原料和化学制品制造业	广东省	广州市	番禺区	广州市番禺区南村镇江南横岗路9号1栋101房、201房	113.409	23.1489
599	广州市仟顺电子设备有限公司	2002-07-16	2023-12-04	C	39	计算机、通信和其他电子设备制造业	广东省	广州市	番禺区	广州市番禺区大石街富石路598号潮联大厦A2栋四层A415号	113.314	23.0138
600	广州市仟壹生物技术有限公司	2000-03-31	2021-06-29	M	75	科技推广和应用服务业	广东省	广州市	海珠区	广州市海珠区荔福路68号六楼（不可作厂房使用）	113.271	23.0971
601	广州市勤思网络科技有限公司	2013-05-16	2024-02-21	I	65	软件和信息技术服务业	广东省	广州市	番禺区	广州市番禺区大龙街番禺大道北1480号磐基大厦9楼	113.396	22.9366
602	广州市权友照明灯具有限公司	2008-06-16	2023-07-27	C	38	电气机械和器材制造业	广东省	广州市	番禺区	广州市番禺区南村镇番禺大道北383号写字楼4栋1606	113.356	23.0046
603	广州市日睛自动化机械有限公司	2010-10-12	2021-09-15	C	38	电气机械和器材制造业	广东省	广州市	增城区	广州市增城新塘镇南埔村沙路口工业区4号	113.565	23.114
604	广州市日森机械股份有限公司	2002-07-23	2019-01-17	C	38	电气机械和器材制造业	广东省	广州市	天河区	广州市天河区珠吉路50号E	113.434	23.1285
605	广州市锐博生物科技有限公司	2004-07-07	2023-03-16	M	73	研究和试验发展	广东省	广州市	黄埔区	广州市黄埔区隧达街7号	113.545	23.1788
606	广州市赛康尼机械设备有限公司	2010-08-10	2023-11-28	M	73	研究和试验发展	广东省	广州市	黄埔区	广州市黄埔区西成中街10号E栋101房	113.516	23.0834
607	广州市三泰汽车内饰材料有限公司	2007-10-24	2022-08-24	C	36	汽车制造业	广东省	广州市	增城区	广州市增城区宁西街新和北路63号	113.64	23.196
608	广州盛祺信息科技股份有限公司（曾用名：广州市盛祺计算机信息技术有限公司）	2002-07-03	2022-08-02	I	65	软件和信息技术服务业	广东省	广州市	天河区	广州市天河区高普路1035号5楼	113.418	23.1784
609	广州市市政工程试验检测有限公司	2002-08-19	2022-04-07	E	48	土木工程建筑业	广东省	广州市	越秀区	广州市越秀区东风东路733号之一自编113房自编之八十房号（不可作厂房使用）	113.285	23.1126
610	广州市思泊隆供水设备有限公司	2003-06-25	2018-08-24	M	73	研究和试验发展	广东省	广州市	越秀区	广州市越秀区先烈中路100号大院省科技图书馆后座五楼（不可作厂房使用）	113.306	23.1451
611	广州市特滤净化设备有限公司	2008-12-08	2022-10-25	C	40	仪器仪表制造业	广东省	广州市	番禺区	广州市番禺区桥南街陈涌村陈涌西六巷12号101铺	113.379	22.9245
612	广州市腾嘉自动化仪表有限公司	2003-05-28	2019-12-25	C	40	仪器仪表制造业	广东省	广州市	黄埔区	广州市黄埔区彩频路9号602-2房（仅限办公）	113.443	23.1684
613	广州市天河诺亚生物工程有限公司	1997-06-27	2021-12-21	M	73	研究和试验发展	广东省	广州市	天河区	广州高新技术产业开发区南云四路1号	113.456	23.1513
614	广州市天威电子科技有限公司	2005-04-11	2023-10-16	M	73	研究和试验发展	广东省	广州市	越秀区	广州市越秀区东华南路19号1801房（部位：自编04、05房）	113.289	23.1241
615	广州市拓然光电科技有限公司	2009-01-12	2017-02-16	M	74	专业技术服务业	广东省	广州市	番禺区	广州市番禺区钟村街钟一村“东岗头”2号501	113.324	22.9762
616	广州市网迅信息技术有限公司	2008-11-12	2023-10-09	I	65	软件和信息技术服务业	广东省	广州市	天河区	广州市天河区兴国路21号广物中心19楼1901、1902、1909房	113.337	23.1217
617	广州市威士环保科技有限公司	2000-03-15	2017-06-12	M	73	研究和试验发展	广东省	广州市	增城区	广州市增城区新塘镇沿江大道20号（沿江大道20号）704-705房	113.633	23.115
618	广州市为人软件科技有限公司	2004-04-01	2023-03-17	I	65	软件和信息技术服务业	广东省	广州市	天河区	广州市天河区花城大道665号2903房（仅限办公）	113.349	23.1241
619	广州市西美信息科技有限公司	2009-12-21	2020-08-26	M	73	研究和试验发展	广东省	广州市	越秀区	广州市越秀区先烈中路80号17楼北区FGHI区域	113.302	23.1426
620	广州市翔声激光科技有限公司	2010-09-13	2022-08-26	C	39	计算机、通信和其他电子设备制造业	广东省	广州市	黄埔区	广州市黄埔区春分路88号自编6栋401	113.576	23.2154
621	广州市小聪软件产业股份有限公司	1999-12-17	2021-06-15	I	65	软件和信息技术服务业	广东省	广州市	黄埔区	广州市黄埔区沙湾三街14号401房	113.537	23.0725
622	广州市雅特霸力化工科技有限公司	2005-12-31	2022-07-19	M	73	研究和试验发展	广东省	广州市	天河区	广州市天河区广汕二路13号403房（仅限办公）	113.408	23.1999
623	广州市夜空彩虹光电科技有限公司	2004-09-09	2022-09-28	M	74	专业技术服务业	广东省	广州市	荔湾区	广州市荔湾区大坦沙桥中中路213-217号J1栋第二层厂房	113.225	23.1283
624	广州市宜源环保科技有限公司	2002-05-20	2021-05-08	N	77	生态保护和环境治理业	广东省	广州市	天河区	广州市天河区上元岗中成路300号大院自编1号办公楼102房之一	113.351	23.1816
625	广州市易度软件开发有限公司	2011-02-12	2023-04-18	M	73	研究和试验发展	广东省	广州市	天河区	广州市天河区软件路11号503室E区14号（仅限办公）	113.419	23.1773
626	广州市亿康环保设备有限公司	2004-05-27	2022-08-23	C	35	专用设备制造业	广东省	广州市	花都区	广州市花都区花东镇朝阳路88号	113.342	23.4619
627	广州市益德电热制品有限公司	2003-02-21	2023-02-10	C	33	金属制品业	广东省	广州市	花都区	广州市花都区花东镇北兴中学东侧	113.432	23.4394
628	广州市银三环机械有限公司	1997-06-09	2024-02-07	C	34	通用设备制造业	广东省	广州市	花都区	广州市花都区新华镇港口工业区东风大道西	113.153	23.3627
629	广州优百特科技有限公司（曾用名：广州市优百特饲料科技有限公司）	2007-12-21	2024-01-25	M	73	研究和试验发展	广东省	广州市	增城区	广州市增城区宁西街朱宁路22号	113.671	23.2308
630	广州市优普计算机有限公司	2001-06-28	2023-11-09	C	39	计算机、通信和其他电子设备制造业	广东省	广州市	天河区	广州市天河区高唐路235号V8（仅限办公）	113.409	23.1715
631	广州市元善计算机科技有限公司	2008-02-01	2021-05-06	M	73	研究和试验发展	广东省	广州市	天河区	广州市天河区大观中路95号1栋307房（仅限办公）	113.414	23.1572
632	广州市悦照车灯有限公司	2014-06-10	2020-04-21	C	38	电气机械和器材制造业	广东省	广州市	花都区	广州市花都区花山镇铁山河路8号之二十五厂房（可作厂房使用）	113.261	23.4234
633	广州市真诚环保科技股份有限公司（曾用名：广州市真诚环保科技有限公司）	2007-03-27	2023-11-20	M	75	科技推广和应用服务业	广东省	广州市	黄埔区	广州市黄埔区开创大道2707号（自编B1栋）1601房	113.473	23.1758
634	广州市中绿环保有限公司	1997-06-06	2024-04-02	M	74	专业技术服务业	广东省	广州市	天河区	广州市天河区员村黄埔大道北白路休岑岗东侧伟城广场1号707至709房	113.374	23.1282
635	广州市资拓科技有限公司	2003-11-11	2023-03-28	I	65	软件和信息技术服务业	广东省	广州市	天河区	广州市天河区龙口西路221号501房（仅限办公）	113.342	23.1442
636	广州市濑加金属加工机械有限公司	2010-08-20	2022-07-25	C	34	通用设备制造业	广东省	广州市	番禺区	广州市番禺区石基镇市莲路石基村段72号101	113.433	22.9565
637	广州市山水生态环保建设有限公司（曾用名：广州市珧凯园林设计有限公司）	2002-03-12	2022-03-15	N	77	生态保护和环境治理业	广东省	广州市	黄埔区	广州市黄埔区科学城掬泉路3号广州国际企业孵化器A703号房（仅限办公）	113.454	23.1685
638	广州市祺福珍珠加工有限公司	2003-12-10	2022-06-24	C	24	文教、工美、体育和娱乐用品制造业	广东省	广州市	番禺区	广州市番禺区沙头街沙头村沙南路50号三楼301	113.356	22.9503
639	广州翎科智慧科技有限公司（曾用名：广州市翎科通信技术有限公司）	2002-05-26	2024-01-24	I	65	软件和信息技术服务业	广东省	广州市	天河区	广州市天河区棠安路188号307房	113.384	23.1389
640	广州市鑫百绿环保科技有限公司	2010-12-17	2022-07-06	M	73	研究和试验发展	广东省	广州市	天河区	广州市天河区天力街7号331房	113.409	23.1232
641	广州市鑫风风机有限公司	2012-03-08	2023-04-10	C	34	通用设备制造业	广东省	广州市	番禺区	广州市番禺区石基镇永善村永峰路10号5栋	113.468	22.9659
642	广州市鑫田净化设备有限公司	2010-03-30	2016-08-23	C	34	通用设备制造业	广东省	广州市	黄埔区	广州经济技术开发区创业路10号、12号、14号、16号三层之四房	113.53	23.0626
643	广州视睿电子科技有限公司	2008-07-11	2022-12-16	M	73	研究和试验发展	广东省	广州市	黄埔区	广州市经济技术开发区科学城科珠路192号	113.445	23.1561
644	广州数娱信息科技有限公司	2011-10-24	2022-08-26	M	73	研究和试验发展	广东省	广州市	越秀区	广州市越秀区太和岗20号1号楼304房（不可作厂房使用）	113.303	23.146
645	广州水如天环保科技有限公司	2013-02-22	2020-01-08	N	77	生态保护和环境治理业	广东省	广州市	海珠区	广州市海珠区新港东路畔江内街28号404房（仅限办公用途）（不可作厂房使用）	113.356	23.1027
646	广州硕点电子科技有限公司	2014-06-28	2023-08-24	F	51	批发业	广东省	广州市	番禺区	广州市番禺区洛浦街迎宾路段19号厦滘商务区A区广州岭南电商园市场1街4楼61号	113.326	23.0453
647	广州思宝健电子有限公司	2010-03-18	2023-08-31	C	39	计算机、通信和其他电子设备制造业	广东省	广州市	增城区	广州市增城石滩镇南北大道7号（厂房A2-1）	113.81	23.1922
648	广州随行信息科技有限公司	2013-05-22	2022-05-11	M	73	研究和试验发展	广东省	广州市	越秀区	广州市越秀区先烈中路80号2201房	113.302	23.1427
649	广州索润科技股份有限公司（曾用名：广州索润环保科技有限公司）	2011-07-30	2018-12-14	M	73	研究和试验发展	广东省	广州市	天河区	广州高新技术产业开发区科学城掬泉路3号广州国际企业孵化器A区A1009房	113.454	23.1685
650	广州泰运电子科技有限公司	2014-03-21	2023-02-17	M	73	研究和试验发展	广东省	广州市	番禺区	广州市番禺区市桥街云星珠坑村横基路12号103室	113.377	22.963
651	广州淘通科技股份有限公司	2012-02-17	2024-04-03	M	73	研究和试验发展	广东省	广州市	天河区	广州市天河区高普路97号自编A202房	113.418	23.1854
652	广东腾岛绿电力技术开发有限公司（曾用名：广州腾岛绿电力技术开发有限公司）	2012-09-03	2023-07-11	D	44	电力、热力生产和供应业	广东省	广州市	越秀区	广州市越秀区解放南路39号万菱广场35层2号单位（仅限办公）	113.269	23.1208
653	广州天宝颂原生物科技开发有限公司	2007-05-31	2021-12-23	M	73	研究和试验发展	广东省	广州市	黄埔区	广州经济技术开发区玉树工业园敬业三街B栋403房	113.44	23.1627
654	广州天极电子科技股份有限公司（曾用名：广州天极电子科技有限公司）	2011-07-26	2023-12-25	C	39	计算机、通信和其他电子设备制造业	广东省	广州市	南沙区	广州市南沙区东涌镇昌利路六街6号	113.479	22.887
655	广东天健软件股份有限公司（曾用名：广州天健软件有限公司）	2010-12-21	2023-03-21	I	65	软件和信息技术服务业	广东省	广州市	黄埔区	广州高新技术产业开发区科学城掬泉路3号广州国际企业孵化器A区A507号房	113.454	23.1685
656	广州田园牧歌农林股份有限公司（曾用名：广州田园牧歌农林有限公司）	2008-09-17	2021-12-27	A	01	农业	广东省	广州市	增城区	广州市增城区仙村镇朱仙路自编128号（荔枝小镇博物馆南侧）	113.711	23.2314
657	广州同欣体育股份有限公司（曾用名：广州同欣康体设备有限公司）	1999-10-11	2023-06-29	R	89	体育	广东省	广州市	番禺区	广州市番禺区钟村街谢村狮岗脚	113.32	22.9661
658	广州同隽医药科技有限公司	2013-04-07	2024-03-27	M	73	研究和试验发展	广东省	广州市	黄埔区	广州高新技术产业开发区科学城科丰路31号华南新材料创新园G11栋501号	113.464	23.1526
659	广州拓源信息技术服务有限公司	2004-03-23	2019-04-29	I	65	软件和信息技术服务业	广东省	广州市	天河区	广州市天河区金穗路1号1606之316（仅限办公）	113.323	23.1304
660	广州网才信息技术有限公司	2005-08-08	2023-07-28	I	65	软件和信息技术服务业	广东省	广州市	番禺区	广州市番禺区东环街金山谷创意十街5号301房	113.39	22.9563
661	广州网控通信科技有限公司	2003-07-24	2018-01-29	I	65	软件和信息技术服务业	广东省	广州市	天河区	广州市天河区广汕二路602号之一第四层416房	113.42	23.1964
662	广州网视通信息科技有限公司	2009-03-16	2023-03-08	M	73	研究和试验发展	广东省	广州市	南沙区	广州市南沙区富佳中街13、15号201-D010	113.56	22.8077
663	广州微信通讯技术有限公司	2006-06-21	2023-08-21	M	73	研究和试验发展	广东省	广州市	天河区	广州市天河区建中路26号2层287室（仅限办公）	113.378	23.1314
664	广州维港环保科技有限公司	2009-07-15	2019-03-13	N	77	生态保护和环境治理业	广东省	广州市	黄埔区	广州市黄埔区科学大道181号A4栋14-15层	113.458	23.1727
665	广州文琪信息科技有限公司	2011-03-17	2019-11-19	M	73	研究和试验发展	广东省	广州市	海珠区	广州市海珠区红卫新村西华十五巷17号之一346房（仅限办公用途）	113.338	23.0919
666	广州仙海网络科技有限公司	2008-06-06	2021-01-26	I	64	互联网和相关服务	广东省	广州市	天河区	广州市天河区体育西路111-115单号18楼G	113.328	23.1416
667	广州协鸿工业机器人技术有限公司	2012-07-02	2021-01-14	C	35	专用设备制造业	广东省	广州市	黄埔区	广州市黄埔区南云五路8号G栋	113.463	23.1502
668	广州协众软件科技有限公司	2009-12-28	2021-12-17	M	73	研究和试验发展	广东省	广州市	天河区	广州市天河区建中路14-16号一楼105房（仅限办公用途）	113.378	23.1321
669	广州薪光合环保技术有限公司	2012-05-08	2024-02-27	C	38	电气机械和器材制造业	广东省	广州市	番禺区	广州市番禺区大龙街富怡路439号323	113.411	22.9592
670	广州新博庭网络信息科技股份有限公司	2002-03-06	2023-05-10	I	65	软件和信息技术服务业	广东省	广州市	天河区	广州市天河区花城大道667号6-23层（15层除外）(部位：12层自编1201、1202房）	113.349	23.1237
671	广州新华时代电子科技有限公司	2008-03-26	2021-09-29	M	74	专业技术服务业	广东省	广州市	黄埔区	广州市黄埔区大沙地东256-258号自编811房	113.46	23.1119
672	广州新游网络科技有限公司	2013-05-22	2019-07-16	M	73	研究和试验发展	广东省	广州市	天河区	广州市天河区华夏路26号2402、2403、2404、2405（部位：自编2401、06-08单元）	113.329	23.1302
673	广州星原高科技产业股份有限公司（曾用名：广州星原文化科技股份有限公司）	2009-06-23	2024-02-22	M	73	研究和试验发展	广东省	广州市	番禺区	广州市番禺区南村镇东线路122号2楼208室A02房	113.405	23.0097
674	广州邢帅教育科技有限公司	2013-05-23	2023-09-14	P	83	教育	广东省	广州市	番禺区	广州市番禺区东环街番禺大道北555号天安总部中心8号厂房201号之一	113.377	22.9853
675	讯联科技股份有限公司（曾用名：广州讯联通信科技股份有限公司）	1998-12-21	2021-01-21	E	49	建筑安装业	广东省	广州市	海珠区	广州市海珠区广州大道南915号3楼302房	113.331	23.2146
676	广州羊城通有限公司	1999-06-17	2023-05-31	I	65	软件和信息技术服务业	广东省	广州市	越秀区	广州市越秀区东华东路车路边37号1栋一至五层（不可作厂房使用）	113.297	23.1276
677	广州一道注塑机械股份有限公司	2005-11-07	2023-03-17	C	35	专用设备制造业	广东省	广州市	黄埔区	广州市高新技术产业开发区神舟路19号自编1栋三楼	113.439	23.1795
678	广州一品红制药有限公司	2010-07-16	2023-08-07	C	27	医药制造业	广东省	广州市	黄埔区	广州市经济技术开发区东区东博路6号	113.508	23.1497
679	广州医博信息技术有限公司	2006-04-25	2020-07-03	M	73	研究和试验发展	广东省	广州市	黄埔区	广州经济技术开发区科学城彩频路7号401D	113.441	23.1694
680	广州易和医疗技术开发有限公司	2013-03-18	2022-08-31	M	73	研究和试验发展	广东省	广州市	黄埔区	广州市黄埔区开源大道188号自编六栋101、102、201、202、301、302、501、502房	113.518	23.1611
681	广州易幻网络科技有限公司	2012-11-09	2023-12-06	I	65	软件和信息技术服务业	广东省	广州市	番禺区	广州市番禺区市桥街丹桂园大街2巷12号三楼302	113.364	22.953
682	广州亿航智能技术有限公司	2014-08-08	2023-10-30	G	56	航空运输业	广东省	广州市	天河区	广州市天河区高普路1021号5楼5986号（仅限办公）	113.419	23.1792
683	广州亿隆电子科技有限公司	2002-07-03	2023-01-11	I	65	软件和信息技术服务业	广东省	广州市	天河区	广州市天河区东圃车陂路黄洲工业区三号一楼西（本住所限写字楼功能）（不可作厂房）	113.395	23.1265
684	广州银达建材科技有限公司	2010-11-19	2021-07-28	M	73	研究和试验发展	广东省	广州市	越秀区	广州市越秀区东风东路836号东峻广场第三座32楼3202自编之二房	113.313	23.1376
685	广州银狐科技股份有限公司（曾用名：广州银狐科技有限公司）	1998-09-18	2023-04-24	C	39	计算机、通信和其他电子设备制造业	广东省	广州市	番禺区	广州市番禺区东环街迎宾路730号番禺节能科技园内天安科技产业大厦2座909房	113.375	22.9873
686	广州盈商电子科技有限公司	2009-06-24	2023-08-24	M	73	研究和试验发展	广东省	广州市	天河区	广州市天河区棠东古隆街17号129房	113.386	23.1496
687	广州雍圆信息技术有限公司	2011-07-19	2023-08-23	M	73	研究和试验发展	广东省	广州市	天河区	广州市天河区五山路371-1号楼28楼A1838号（仅限办公）	113.353	23.153
688	广州优通网络技术有限公司	2014-05-27	2021-07-28	M	73	研究和试验发展	广东省	广州市	番禺区	广州市番禺区沙头街禺山西路329号1座304	113.348	22.9437
689	广州宇竣智能机械有限公司（曾用名：广州宇竣包装设备有限公司）	2014-03-05	2020-07-20	M	73	研究和试验发展	广东省	广州市	黄埔区	广州市黄埔区云埔工业区云展路11号C、D栋自编101、102、202	113.543	23.156
690	广州宇洋智能科技有限公司	2008-08-13	2019-03-28	M	73	研究和试验发展	广东省	广州市	黄埔区	广州经济技术开发区南翔支路1号自编三栋C501-B	113.456	23.1615
691	广州誉恒专用设备有限公司	2011-01-30	2015-11-24	C	35	专用设备制造业	广东省	广州市	黄埔区	广州市经济技术开发区永和经济区春分路9号	113.582	23.2077
692	广州誉网信息技术有限公司	2013-12-09	2023-03-28	I	65	软件和信息技术服务业	广东省	广州市	海珠区	广州市海珠区南洲路183号二层A59房	113.306	23.071
693	广州源生医药科技有限公司	2009-12-21	2021-11-03	M	73	研究和试验发展	广东省	广州市	黄埔区	广州高新技术产业开发区科学城掬泉路3号广州国际企业孵化器D区D1003、D1004、D1005号房	113.453	23.1689
694	广州粤辰星电子科技有限公司	2011-11-24	2024-03-22	M	73	研究和试验发展	广东省	广州市	天河区	广州市天河区东郊工业园路建工路8号3楼自编A085号（仅限办公）	113.379	23.13
695	广州粤高专利商标代理有限公司	2001-08-31	2023-08-22	M	75	科技推广和应用服务业	广东省	广州市	天河区	广州市天河区体育西路191号B塔4416（仅限办公用途）	113.328	23.1461
696	广州悦信无线科技有限公司	2012-01-09	2024-04-08	M	73	研究和试验发展	广东省	广州市	天河区	广州市天河区华旭街3号1063房（仅限办公）	113.336	23.1431
697	广州耘趣网络科技有限公司	2013-09-30	2019-01-11	M	73	研究和试验发展	广东省	广州市	越秀区	广州市越秀区寺右新马路111-115号1401房之二号（仅限办公用途）	113.32	23.1265
698	广州兆光电子有限公司	2010-07-21	2020-03-30	C	39	计算机、通信和其他电子设备制造业	广东省	广州市	番禺区	广州市番禺区大龙街东怡区二街4号	113.398	22.94
699	广州振清环保技术有限公司	2007-09-26	2023-11-15	M	73	研究和试验发展	广东省	广州市	南沙区	广州市南沙区金隆路26号408、409房（仅限办公用途）	113.552	22.8053
700	正邦（广州）新材料有限公司（曾用名：广州正邦化工有限公司）	2004-11-08	2024-03-28	C	26	化学原料和化学制品制造业	广东省	广州市	黄埔区	广州经济技术开发区青年路336号科瑞大厦主楼八楼	113.54	23.0705
701	广州致辉精化股份有限公司	2008-10-17	2023-09-20	M	73	研究和试验发展	广东省	广州市	番禺区	广州市番禺区番禺大道北东环街555号节能科技园总部中心15号楼506	113.375	22.9874
702	广州智生网络技术有限公司	2012-06-25	2023-03-02	I	65	软件和信息技术服务业	广东省	广州市	天河区	广州市天河区天河北路689号1302房	113.349	23.1476
703	广州中康食品有限公司	2011-12-14	2017-04-23	C	14	食品制造业	广东省	广州市	从化区	广州市从化区鳌头镇正鳌路238号（厂房1）	113.434	23.6232
704	中煤江南建设发展集团有限公司（曾用名：广州中煤江南基础工程公司）	1986-04-19	2022-08-08	M	74	专业技术服务业	广东省	广州市	越秀区	广州市越秀区东风西路140号1002-1007单元	113.256	23.139
705	广州中胜物联网络科技有限公司	2012-12-12	2016-09-07	M	73	研究和试验发展	广东省	广州市	黄埔区	广州经济技术开发区科学城科珠路232号2栋505B房	113.445	23.1768
706	广州中运计算机软件有限公司	2002-05-20	2019-12-09	I	65	软件和信息技术服务业	广东省	广州市	荔湾区	广州市荔湾区花地大道中51号第五层8528房（仅限办公用途）	113.242	23.1012
707	广州中弈信息科技有限公司	2005-05-18	2021-09-18	M	73	研究和试验发展	广东省	广州市	从化区	广东从化经济开发区工业大道9号商务办公楼102之三室（仅作办公使用）	113.5	23.4523
708	广州卓居智能科技有限公司	2011-12-14	2022-02-21	M	73	研究和试验发展	广东省	广州市	天河区	广州市天河区思成路23号宏太智慧谷七号楼2楼自编218A房（仅限办公）	113.423	23.18
709	广州卓远虚拟现实科技股份有限公司（曾用名：广州卓远机械有限公司）	2011-06-15	2024-01-25	M	73	研究和试验发展	广东省	广州市	番禺区	广州市番禺区大龙街文桥路新桥村段13号103栋、104栋、105栋	113.423	22.9569
710	广州资源环保科技股份有限公司	1999-02-02	2022-09-22	D	46	水的生产和供应业	广东省	广州市	越秀区	广州市越秀区广州大道中289号南方传媒大厦B座2204房（仅限办公使用）	113.321	23.1283
711	广州葆妍生物科技有限公司	2009-09-30	2022-07-22	C	26	化学原料和化学制品制造业	广东省	广州市	番禺区	广州市番禺区南村镇金山工业园2号楼二楼、三楼	113.356	22.9887
712	广州怡境规划设计有限公司（曾用名：广州怡境景观设计有限公司）	2001-12-09	2023-02-02	M	74	专业技术服务业	广东省	广州市	天河区	广州市天河区华夏路49号之一801-810房	113.327	23.1321
713	广州瀚唐电子科技有限公司	2007-01-11	2023-11-13	M	73	研究和试验发展	广东省	广州市	黄埔区	广州市黄埔区香雪大道中60号1322房（仅限办公）	113.507	23.1812
714	广州梓阳通信技术有限公司	2011-07-26	2019-07-04	M	74	专业技术服务业	广东省	广州市	黄埔区	广州市黄埔区起云路3号4栋607房	113.434	23.1738
715	广州笃行通信科技有限公司	2005-05-16	2018-12-26	M	73	研究和试验发展	广东省	广州市	天河区	广州市天河区五山路267号29H房（仅限办公用途）	113.352	23.149
716	广州鑫星环保科技有限公司	2004-10-27	2019-06-21	M	75	科技推广和应用服务业	广东省	广州市	海珠区	广州市海珠区新港中路376号1510房（仅限办公）	113.331	23.1017
717	和峻（广州）胶管有限公司	2005-12-29	2015-12-08	C	29	橡胶和塑料制品业	广东省	广州市	花都区	广州市花都区梯面镇联民村二队	113.315	23.5618
718	金银卡（广州）生物科技股份有限公司（曾用名：金银卡（广州）生物科技有限公司）	2006-05-29	2020-07-27	M	73	研究和试验发展	广东省	广州市	黄埔区	广州经济技术开发区永和区永盛路25号	113.586	23.2248
719	联德（广州）机械有限公司	2003-02-18	2017-06-26	C	34	通用设备制造业	广东省	广州市	黄埔区	广州市高新技术产业开发区科学城南云一路17号	113.449	23.1583
720	龙倡（广州）花边有限公司	2000-12-04	2021-08-09	C	17	纺织业	广东省	广州市	番禺区	广州市番禺区石楼镇莲花山莲花西路	113.509	22.9932
721	新意（广州）电子科技有限公司	1999-04-13	2023-11-21	M	73	研究和试验发展	广东省	广州市	海珠区	广州市海珠区南洲路28号312房	113.304	23.0702
722	泽鸿（广州）电子科技有限公司	2006-01-13	2021-01-08	C	39	计算机、通信和其他电子设备制造业	广东省	广州市	黄埔区	广州高新技术产业开发区科学城科珠路202号	113.446	23.16
723	艾派（广州）医疗器械有限公司	2005-01-07	2024-01-31	C	35	专用设备制造业	广东省	广州市	黄埔区	广州经济技术开发区永和经济区永华路25号	113.57	23.2293
724	奥特朗电器（广州）有限公司	2006-05-17	2016-11-14	C	38	电气机械和器材制造业	广东省	广州市	黄埔区	广州高新技术产业开发区科学城南翔一路68号厂房三	113.449	23.1767
725	博彦科技广州有限公司	2012-11-01	2023-07-31	I	65	软件和信息技术服务业	广东省	广州市	白云区	广州市白云区北太路1633号广州民营科技园科盛路8号配套服务大楼4层A401-20房	113.342	23.3064
726	长兴（广州）光电材料有限公司	2006-12-28	2024-03-28	C	39	计算机、通信和其他电子设备制造业	广东省	广州市	黄埔区	广州高新技术产业开发区科学城瑞和路8号	113.515	23.1559
727	贝思德迩医疗器材（广州）有限公司（曾用名：德迩玛医疗器材（广州）有限公司）	2007-01-18	2020-08-18	C	35	专用设备制造业	广东省	广州市	番禺区	广州番禺区石基镇市莲路官涌村段1号之三	113.463	22.9602
728	东软集团（广州）有限公司	2008-09-10	2020-03-10	M	73	研究和试验发展	广东省	广州市	黄埔区	广州市高新技术产业开发区科学城揽月路8号	113.452	23.1674
729	广上科技（广州）股份有限公司（曾用名：广上科技（广州）有限公司）	1998-04-23	2024-02-23	C	39	计算机、通信和其他电子设备制造业	广东省	广州市	黄埔区	广州保税区保盈南路19号。	113.538	23.0795
730	广州犇牛网络科技股份有限公司	2014-08-11	2019-03-06	I	65	软件和信息技术服务业	广东省	广州市	海珠区	广州市海珠区琶洲大道东1号2105号	113.379	23.1093
731	广州阿旺斯复合材料技术有限公司	2011-01-31	2023-05-16	C	29	橡胶和塑料制品业	广东省	广州市	花都区	广州市花都区秀全街花港大道66号自编之6号	113.162	23.3725
732	广州埃信电信设备有限公司	2002-07-23	2022-10-11	C	39	计算机、通信和其他电子设备制造业	广东省	广州市	天河区	广州市天河区高普路83号A栋206房	113.418	23.1924
733	广州艾格生物科技有限公司	2008-01-04	2023-08-01	M	73	研究和试验发展	广东省	广州市	黄埔区	广州高新技术产业开发区科学城掬泉路3号广州国际企业孵化器B区B401号	113.454	23.1685
734	广州艾空网络科技有限公司	2009-06-05	2020-07-17	M	73	研究和试验发展	广东省	广州市	天河区	广州市天河区华观路1934号416房	113.412	23.1729
735	广州艾力普斯制冷设备有限公司	2011-12-22	2024-03-26	C	38	电气机械和器材制造业	广东省	广州市	白云区	广州市白云区石井街大朗村枝园东街自编6号	113.247	23.2454
736	广州艾默德驱动系统技术有限公司	2012-12-18	2023-10-16	M	73	研究和试验发展	广东省	广州市	黄埔区	广州市黄埔区禾丰布岭二街7号之一501室（仅限办公）	113.56	23.2184
737	广州珠江艾茉森数码乐器股份有限公司（曾用名：广州艾茉森电子有限公司）	2008-07-30	2023-09-26	M	73	研究和试验发展	广东省	广州市	增城区	广州市增城经济技术开发区香山大道38号自编1号楼二、三、四层	113.63	23.1798
738	广东爱迪斯新型材料科技有限公司（曾用名：广州爱迪斯建筑材料有限公司）	2013-04-11	2023-05-17	C	30	非金属矿物制品业	广东省	广州市	白云区	广州市白云区云城街齐富路1号18层005房	113.278	23.1993
739	广州爱申特科技股份有限公司（曾用名：广州爱申特电源科技有限公司）	2013-12-11	2023-09-28	M	73	研究和试验发展	广东省	广州市	黄埔区	广州市黄埔区科学大道111号主楼1101房	113.445	23.1721
740	广州爱迅信息技术有限公司（曾用名：广州爱迅企业管理咨询有限公司）	2009-11-11	2022-12-29	I	65	软件和信息技术服务业	广东省	广州市	海珠区	广州市海珠区新港西路105号A座二层之一（仅限办公）	113.3	23.0986
741	广州安德信幕墙有限公司	2011-03-30	2021-08-11	E	49	建筑安装业	广东省	广州市	海珠区	广州市海珠区新港东路1068号2207房（仅限办公）	113.376	23.1038
742	广州安雷电子科技有限公司	2007-12-11	2024-03-15	M	73	研究和试验发展	广东省	广州市	番禺区	广州市番禺区石楼镇创启路63号创智37号楼三楼	113.465	22.9836
743	广州安腾达化工科技有限公司	2012-07-17	2021-05-20	M	73	研究和试验发展	广东省	广州市	海珠区	广州市海珠区海联路6、8号420自编之二（不可作厂房使用）	113.285	23.113
744	广州安霆科技有限公司	2004-04-24	2022-05-17	I	65	软件和信息技术服务业	广东省	广州市	天河区	广州市天河区林和西路9号3916室（部位：C）（仅限办公）	113.33	23.1486
745	广州岸腾信息科技有限公司	2009-12-25	2020-08-03	I	64	互联网和相关服务	广东省	广州市	荔湾区	广州市荔湾区芳村大道东200号65栋4201房（仅限办公）	113.25	23.1018
746	广州昂拓信息技术有限公司	2011-04-15	2020-03-12	M	73	研究和试验发展	广东省	广州市	天河区	广州市天河区华观路1933号之一205房（仅限办公）	113.409	23.1744
747	广州傲程软件技术有限公司	2010-04-12	2022-06-14	I	65	软件和信息技术服务业	广东省	广州市	天河区	广州市天河区粤垦路607号901-912房（部位：901-2）（仅限办公）	113.334	23.1622
748	广州傲海计算机科技有限公司	2003-06-10	2020-11-24	I	65	软件和信息技术服务业	广东省	广州市	天河区	广州市天河区岑村圣堂大街工业区38号二层2071（仅限办公）	113.395	23.1616
749	广州傲胜人造草股份有限公司	2000-11-29	2023-11-06	C	19	皮革、毛皮、羽毛及其制品和制鞋业	广东省	广州市	黄埔区	广州经济技术开发区东区骏达路19号	113.528	23.1459
750	广州奥克林餐厨降解设备有限公司	2011-08-30	2021-09-24	C	35	专用设备制造业	广东省	广州市	黄埔区	广州市黄埔区永和街布岭路135号A栋101房	113.55	23.2129
751	广州奥鑫通讯设备有限公司	2002-08-29	2020-08-20	C	39	计算机、通信和其他电子设备制造业	广东省	广州市	从化区	广州市从化江埔街河东北路93号（净化车间）	113.611	23.5517
752	广州澳盾智能科技有限公司	2012-05-28	2023-07-06	M	73	研究和试验发展	广东省	广州市	天河区	广州市天河区思成路35号B座八层（仅限办公用途）	113.428	23.1836
753	广州澳企实验室技术股份有限公司	2003-12-15	2023-08-10	M	73	研究和试验发展	广东省	广州市	黄埔区	广州市黄埔区掬泉路3号H栋501房H栋502房H栋503房H栋504房H栋505房	113.455	23.1687
754	广州澳升洁净技术有限公司	2005-03-17	2023-11-07	M	73	研究和试验发展	广东省	广州市	黄埔区	广州高新技术产业开发区瑞泰路2号C栋四层自编C02号	113.515	23.1581
755	广州艾丽莎生物科技有限公司（曾用名：广州柏俐臣化妆品有限公司）	2012-10-15	2023-02-08	C	26	化学原料和化学制品制造业	广东省	广州市	白云区	广州市白云区白云湖街大朗北路59号二、三、四层	113.248	23.2525
756	广州柏胜化工有限公司	2004-11-19	2019-04-30	C	26	化学原料和化学制品制造业	广东省	广州市	增城区	广州市增城中新镇迳贝路	113.635	23.2822
757	广州百立可科技有限公司（曾用名：广州百立可档案设备有限公司）	2013-04-15	2018-05-23	M	73	研究和试验发展	广东省	广州市	天河区	广州市天河区中山大道西1138号7层723房（仅限办公用途，不可作厂房使用。）	113.384	23.1335
758	广州百奕信息科技有限公司	2014-10-14	2023-12-01	I	64	互联网和相关服务	广东省	广州市	越秀区	广州市越秀区人民北路604号之二10层自编02单元	113.285	23.1126
759	广州百孚润化工有限公司	2011-06-17	2021-06-17	F	51	批发业	广东省	广州市	白云区	广州市白云区黄园路马务联和工业区自编B3栋305号	113.272	23.2121
760	广州佰家环保科技有限公司	2008-07-07	2023-02-22	N	77	生态保护和环境治理业	广东省	广州市	黄埔区	广州市黄埔区南翔二路1号B栋501房	113.446	23.1615
761	广州佰锐网络科技有限公司	2007-04-19	2022-08-26	M	73	研究和试验发展	广东省	广州市	天河区	广州市天河区科韵路16号自编第3栋701（01梯七层）（仅限办公）	113.378	23.1314
762	广州佰兴信息技术有限公司	2011-03-30	2023-12-12	M	73	研究和试验发展	广东省	广州市	天河区	广州市天河区华景路71号302室之K31	113.365	23.1447
763	广州邦诺日用品有限公司	2010-09-02	2017-03-15	C	26	化学原料和化学制品制造业	广东省	广州市	白云区	广州市白云区人和镇顺景路8号1栋	113.286	23.3447
764	广州保亮得塑料科技有限公司	2007-05-31	2023-05-17	M	73	研究和试验发展	广东省	广州市	南沙区	广州市南沙区榄核镇万安村榄北路110号B2-302房	113.352	22.8816
765	广州保瑞医疗技术有限公司	2006-08-03	2024-02-07	M	73	研究和试验发展	广东省	广州市	白云区	广州市白云区科园路1号自编1栋4楼	113.342	23.3025
766	广州宝巨信息技术有限公司	2014-01-14	2023-07-05	M	73	研究和试验发展	广东省	广州市	天河区	广州市天河区天河北路689号1005房（仅限办公用途）	113.348	23.1474
767	广州宝立科技有限公司	2014-06-18	2023-12-25	M	73	研究和试验发展	广东省	广州市	天河区	广州市天河区黄埔大道西100号之二1401室（仅限办公）	113.347	23.1333
768	广州驼人贝康医疗科技有限公司（曾用名：广州贝康医疗科技有限公司）	2013-04-26	2019-09-10	M	73	研究和试验发展	广东省	广州市	黄埔区	广州高新技术产业开发区科学城南翔二路72号易翔科技园第4栋3楼	113.462	23.1586
769	广州贝晓德智能科技有限公司（曾用名：广州贝晓德传动配套有限公司）	2000-09-21	2021-11-29	M	73	研究和试验发展	广东省	广州市	越秀区	广州市越秀区华乐路53号1210室	113.294	23.1407
770	广州焙欧机械设备有限公司	2014-03-17	2023-09-26	C	38	电气机械和器材制造业	广东省	广州市	增城区	广州市增城区新塘镇永宁街宁西朱宁路26号厂房A1（四层）	113.678	23.2357
771	广州本金机电设备有限公司	2006-07-20	2023-08-31	C	34	通用设备制造业	广东省	广州市	花都区	广州花都区新华街溪秀路38号之二	113.148	23.3599
772	广州比逊电子科技有限公司	2014-06-19	2023-01-16	M	73	研究和试验发展	广东省	广州市	番禺区	广州市番禺区东环街番禺大道北555号天安总部中心13号厂房401之2	113.38	22.987
773	广州碧德科技股份有限公司（曾用名：广州碧德电子科技有限公司）	2011-07-26	2021-04-14	C	39	计算机、通信和其他电子设备制造业	广东省	广州市	黄埔区	广州市黄埔区科学城科学大道162号创意大厦B2区403-404（仅限办公）	113.457	23.1696
774	广州碧辉腾乐软件科技有限公司	2013-08-21	2022-04-08	I	65	软件和信息技术服务业	广东省	广州市	天河区	广州市天河区粤垦路188号五楼自编514-002房（仅限办公）	113.34	23.1609
775	广州毕思达信息科技有限公司	2009-07-24	2020-03-27	M	73	研究和试验发展	广东省	广州市	天河区	广州市天河区大观南路26号A711（仅限办公）	113.414	23.1347
776	广州波视信息科技股份有限公司（曾用名：广州波视信息科技有限公司）	2012-05-28	2023-08-15	M	73	研究和试验发展	广东省	广州市	黄埔区	广州高新技术产业开发区科学城科学大道182号创新大厦C1区第8层803单元	113.463	23.1729
777	广州博恩能源有限公司	2009-10-22	2023-01-03	C	34	通用设备制造业	广东省	广州市	白云区	广州市白云区北太路1633号广州民营科技园科盛路8号配套服务大楼B508-1房	113.342	23.302
778	广州博冠光电科技股份有限公司	2000-07-17	2023-09-25	M	73	研究和试验发展	广东省	广州市	黄埔区	广州市高新技术产业开发区科学城开源大道11号A5栋第三层A单元	113.504	23.1626
779	广州博纳信息技术有限公司	2008-08-29	2021-06-23	I	65	软件和信息技术服务业	广东省	广州市	越秀区	广州市越秀区东风东路745号1802、1803房（仅限办公用途）	113.311	23.1382
780	广州博泉环保材料科技有限公司	2009-03-02	2020-12-30	C	26	化学原料和化学制品制造业	广东省	广州市	增城区	广州市增城石滩镇上塘村东二社四方墩（土名）厂房A2之二	113.837	23.1532
781	广州博瑞信息技术股份有限公司（曾用名：广州博瑞测绘技术股份有限公司）	2005-03-21	2024-01-09	M	73	研究和试验发展	广东省	广州市	白云区	广州市白云区鹤龙一路88号A区402室	113.275	23.2189
782	广州雍远溯智能装备科技有限公司（曾用名：广州博润包装机械有限公司）	2013-08-22	2022-11-25	C	34	通用设备制造业	广东省	广州市	花都区	广州市花都区花城街东队大湖庄自编4号101厂	113.207	23.4121
783	广州博研智能科技有限公司	2009-12-28	2023-07-17	M	73	研究和试验发展	广东省	广州市	增城区	广州市增城区宁西街创强路148号（办公楼A1）部分	113.653	23.1855
784	广州博伊通软件科技有限公司	2012-12-19	2021-06-29	M	73	研究和试验发展	广东省	广州市	黄埔区	广州市萝岗区云埔工业区云骏路2号自编第2栋201	113.546	23.1489
785	广州博睿凯信息科技有限公司	2011-11-04	2022-10-24	M	75	科技推广和应用服务业	广东省	广州市	海珠区	广州市海珠区南洲路183号二层C31房	113.306	23.071
786	广州彩旗网络技术有限公司	2013-11-28	2020-08-14	I	64	互联网和相关服务	广东省	广州市	番禺区	广州市番禺区市桥街光明南路199号1号楼608单元	113.367	22.945
787	广州长昇智能机械设备有限公司	2013-05-22	2023-07-27	C	34	通用设备制造业	广东省	广州市	海珠区	广州市海珠区南洲路1228号钢材仓（可作厂房使用）	113.325	23.0675
788	广东长城宽带网络服务有限公司（曾用名：广州长城宽带网络服务有限公司）	2000-12-05	2022-12-28	M	73	研究和试验发展	广东省	广州市	海珠区	广州市海珠区礼岗路10号之一301-304室（仅限办公）	113.284	23.0926
789	广州畅驰环保科技股份有限公司（曾用名：广州畅驰机电设备有限公司）	2004-10-22	2018-11-22	M	73	研究和试验发展	广东省	广州市	黄埔区	广州市萝岗区东荟二街81号628房	113.507	23.1685
790	广州超邦化工有限公司	1992-04-25	2023-12-29	C	26	化学原料和化学制品制造业	广东省	广州市	白云区	广州市白云区江高镇神山郭塘郭雅路88号	113.215	23.3446
791	超音速人工智能科技股份有限公司（曾用名：广州超音速自动化科技股份有限公司）	2010-07-02	2024-02-27	M	73	研究和试验发展	广东省	广州市	番禺区	广州市番禺区石基镇金山村华创动漫产业园B10栋	113.431	22.9998
792	广州超禹膜分离技术有限公司	2002-06-25	2017-02-04	M	73	研究和试验发展	广东省	广州市	花都区	广州市花都区花山镇龙口村第三经济社工业园	113.262	23.4077
793	广州超越通信科技有限公司	2001-03-08	2023-07-19	M	73	研究和试验发展	广东省	广州市	天河区	广州市天河区中山大道西89号15层1511-1514号（仅限办公）	113.363	23.1413
794	广州潮昇动漫科技有限公司	2013-02-22	2024-03-18	M	74	专业技术服务业	广东省	广州市	越秀区	广州市越秀区流花路117号7号馆106室（部位：3层F）	113.266	23.147
795	广州潮徽生物科技有限公司（曾用名：广州潮徽化工科技有限公司）	2010-10-20	2024-01-09	M	75	科技推广和应用服务业	广东省	广州市	黄埔区	广州市黄埔区茅岗路848号8楼C098房（仅限办公）	113.446	23.1252
796	广州车保叁陆零信息科技股份有限公司	2010-11-17	2019-01-29	F	51	批发业	广东省	广州市	白云区	广州市白云区广园中路383号广州市经典印刷包装机械市场自编号为G区9-10号场地	113.283	23.1671
797	广州车行易科技股份有限公司	2011-06-15	2023-09-05	M	73	研究和试验发展	广东省	广州市	天河区	广州市天河区高普路1021号5楼5916号	113.419	23.1792
798	广州辰亿信息科技有限公司	2012-07-30	2020-09-04	I	65	软件和信息技术服务业	广东省	广州市	越秀区	广州市越秀区寺右新马路北二街26号之一二楼205室之五室	113.32	23.1268
799	广州成大泡塑包装材料有限公司	2008-10-14	2016-10-10	C	29	橡胶和塑料制品业	广东省	广州市	花都区	广州市花都区花东镇北兴莘田工业园	113.42	23.4174
800	广东程视视觉科技股份有限公司（曾用名：广州程氏信息科技有限公司）	2013-09-10	2024-03-13	I	65	软件和信息技术服务业	广东省	广州市	番禺区	广州市番禺区大石街石北工业路644号15栋301	113.293	23.0202
801	广州程星通信科技有限公司	2011-04-11	2023-09-13	M	73	研究和试验发展	广东省	广州市	黄埔区	广州市黄埔区科学城科丰路31号华南新材料创新园G4栋502	113.464	23.155
802	广州诚安路桥检测有限公司	2003-09-22	2023-12-01	M	73	研究和试验发展	广东省	广州市	白云区	广州市白云区新广从一路338号	113.327	23.264
803	广州诚予国际市场信息研究有限公司	2004-04-12	2017-11-27	I	65	软件和信息技术服务业	广东省	广州市	越秀区	广州市越秀区东风东路767号东宝大厦1202-1206房	113.318	23.1378
804	广州驰立自动化设备有限公司	2014-05-29	2023-05-09	C	40	仪器仪表制造业	广东省	广州市	黄埔区	广州市黄埔区西成中街10号C栋501房	113.515	23.0808
805	广州传宇信息科技有限公司	2010-07-29	2023-06-09	I	65	软件和信息技术服务业	广东省	广州市	荔湾区	广州市荔湾区逢源路128号1406房（仅作写字楼功能用）	113.246	23.1265
806	广州创和装备股份有限公司（曾用名：广州创和物流产业有限公司）	2007-06-04	2024-01-25	C	34	通用设备制造业	广东省	广州市	增城区	广州市增城区新塘镇东洲大道旁	113.596	23.1119
807	广州创合智能科技有限公司	2004-10-18	2022-01-17	I	65	软件和信息技术服务业	广东省	广州市	天河区	广州市天河区桃园西路616号106铺（不可作厂房使用）	113.42	23.1246
808	广州创湖电子科技有限公司	2008-11-13	2019-06-12	M	73	研究和试验发展	广东省	广州市	天河区	广州市天河区黄埔大道西365号1409室（不可作厂房使用）（仅限办公）	113.345	23.1332
809	广州创乐激光设备有限公司	2012-12-04	2021-08-12	C	40	仪器仪表制造业	广东省	广州市	花都区	广州市花都区雅瑶东路23号1栋101房	113.227	23.4112
810	广州创领水产科技有限公司	2009-11-27	2019-09-04	M	73	研究和试验发展	广东省	广州市	白云区	广州市白云区太和镇永兴东二横路10号1栋101房（自主申报）	113.329	23.2724
811	创启科技（广州）有限公司（曾用名：广州创启通信设备有限公司）	2004-09-03	2023-06-15	M	75	科技推广和应用服务业	广东省	广州市	黄埔区	广州市黄埔区神舟路9号1栋101房、1栋218房、1栋219房	113.438	23.1754
812	广州创显科教股份有限公司	2010-12-14	2023-09-20	I	65	软件和信息技术服务业	广东省	广州市	番禺区	广州市番禺区东环街番禺大道北555号天安总部中心16号楼302房	113.377	22.9859
813	广州创芯旗自动化控制设备有限公司	2013-08-22	2019-02-26	C	40	仪器仪表制造业	广东省	广州市	南沙区	广州市南沙区榄核镇蔡新路284号C101	113.338	22.8381
814	广州春晓信息科技有限公司	2006-03-27	2022-03-16	I	65	软件和信息技术服务业	广东省	广州市	番禺区	广州市番禺区市桥街大北路403号一期501室	113.362	22.9837
815	广州纯科环保科技有限公司	2009-04-01	2022-03-07	M	73	研究和试验发展	广东省	广州市	白云区	广州市白云区均禾街清湖村一社苏元庄路自编8号三楼（仅作办公场地）	113.274	23.2652
816	广州聪明云软件科技有限公司	2012-12-27	2024-02-29	M	73	研究和试验发展	广东省	广州市	海珠区	广州市海珠区建基路66号2601之H440号（仅限办公）	113.294	23.1057
817	广州丛林网络科技有限公司	2011-11-17	2022-07-08	M	73	研究和试验发展	广东省	广州市	海珠区	广州市海珠区新港西路135号大院园西区705号楼中大科技园B座自编号601室（仅限办公）	113.298	23.0993
818	广州达桥食品设备有限公司	2007-11-01	2024-02-01	C	35	专用设备制造业	广东省	广州市	天河区	广州市天河区五山路373号五山科技广场（部位：C437房）（不可作厂房使用）（仅限办公用途）	113.354	23.1542
819	广州大美网络科技有限公司	2014-07-18	2020-02-12	M	73	研究和试验发展	广东省	广州市	天河区	广州市天河区中山大道中38号加悦大厦311房（仅限办公用途）	113.401	23.1302
820	广州大禹防漏技术开发有限公司	1995-03-20	2023-03-13	M	73	研究和试验发展	广东省	广州市	番禺区	广州市番禺区钟村街祈福福华路15号1401-1412房	113.338	22.9785
821	广州大中电力技术有限公司	2014-10-22	2021-03-31	C	39	计算机、通信和其他电子设备制造业	广东省	广州市	黄埔区	广州高新技术产业开发区光谱西路3号研发厂房708房	113.425	23.1648
822	广州道宜汽车设备有限公司	2012-11-12	2022-06-10	C	35	专用设备制造业	广东省	广州市	花都区	广州市花都区秀全街马溪村溪秀路22号101房	113.151	23.3558
823	广州德达泰尔通信有限公司	2001-10-18	2022-07-27	M	73	研究和试验发展	广东省	广州市	海珠区	广州市海珠区新港东路海诚西街7号501房	113.382	23.1042
824	广州德莱克自动化设备股份有限公司（曾用名：广州德莱克自动化设备有限公司）	2010-04-06	2023-05-08	M	73	研究和试验发展	广东省	广州市	黄埔区	广州市经济技术开发区开发大道217号首层、二层01（广信厂房南塔）	113.352	23.1489
825	德旭新材料（广州）股份有限公司（曾用名：广州德旭新材料有限公司）	2012-04-12	2023-12-04	C	26	化学原料和化学制品制造业	广东省	广州市	黄埔区	广州高新技术产业开发区科学城掬泉路3号广州国际企业孵化器D区D915号房	113.453	23.1689
826	广东德珑磁电科技股份有限公司（曾用名：广州德珑磁电科技股份有限公司）	2010-11-30	2023-10-27	C	39	计算机、通信和其他电子设备制造业	广东省	广州市	番禺区	广州市番禺区石基镇金山村华创动漫产业园B25号第四层	113.429	22.9999
827	广州迪澳生物科技有限公司	2008-06-23	2021-11-10	M	73	研究和试验发展	广东省	广州市	黄埔区	广州市黄埔区科丰路31号G7栋401	113.466	23.1551
828	广州迪宝乐电子有限公司	1998-08-26	2021-09-06	C	39	计算机、通信和其他电子设备制造业	广东省	广州市	黄埔区	广州市黄埔区大沙街道文加路莲塘段2号（门口田厂房）（自主申报）	113.469	23.1463
829	广州帝沃利信息技术有限公司	2009-06-28	2021-07-29	M	73	研究和试验发展	广东省	广州市	海珠区	广州市海珠区新港中路350号之五2001房（仅限办公用途）	113.325	23.1017
830	广东金朋科技有限公司（曾用名：广州点博通信技术有限公司）	2006-11-02	2021-04-23	I	65	软件和信息技术服务业	广东省	广州市	黄埔区	广州市黄埔区科学大道50号自编A3栋5层504房	113.437	23.1707
831	广州点动信息科技股份有限公司	2005-11-17	2024-02-22	I	65	软件和信息技术服务业	广东省	广州市	荔湾区	广州市荔湾区花地大道中64号12楼	113.241	23.1022
832	广州典实科仪设备有限公司	2004-02-25	2023-11-30	M	73	研究和试验发展	广东省	广州市	天河区	广州市天河区大观中路95号B301（仅限办公用途）（不可作厂房使用）	113.413	23.1574
833	南方电网数字电网集团信息通信科技有限公司（曾用名：广州电力通信网络有限公司）	1999-08-30	2024-02-28	E	49	建筑安装业	广东省	广州市	黄埔区	广州市黄埔区光谱中路11号2栋3单元12层全层	113.451	23.1655
834	广州电蟒信息技术有限公司	2014-02-19	2023-05-16	I	65	软件和信息技术服务业	广东省	广州市	花都区	广州市花都区新华街镜湖大道8号H5	113.256	23.3791
835	广州顶新时代电子系统科技有限公司	2000-01-31	2023-12-13	I	65	软件和信息技术服务业	广东省	广州市	越秀区	广州市越秀区天河路1号701、702、703703房（仅限办公使用）（不可作厂房使用）	113.317	23.1408
836	广州鼎鼎信息科技有限公司	2010-08-16	2024-02-29	M	73	研究和试验发展	广东省	广州市	黄埔区	广州市黄埔区科学大道182号广州科学城创新大厦C2栋311房	113.462	23.1723
837	广州鼎昊信息科技有限公司	2012-11-14	2024-02-26	M	73	研究和试验发展	广东省	广州市	荔湾区	广州市荔湾区下涌直街2号B003房（仅限办公）	113.248	23.1043
838	广东润石信息技术有限公司（曾用名：广州东方标准信息科技有限公司）	2008-08-14	2024-03-28	I	65	软件和信息技术服务业	广东省	广州市	天河区	广州市天河区天河路299号天河体育中心体育场自编1010铺	113.331	23.1437
839	广州东焊智能装备有限公司	2011-09-09	2022-12-12	C	35	专用设备制造业	广东省	广州市	番禺区	广州市番禺区化龙镇金荷一路22号	113.503	23.0383
840	广州东林生物科技有限公司	2004-03-25	2021-07-06	M	73	研究和试验发展	广东省	广州市	黄埔区	广州经济技术开发区蓝玉四街九号科技园五号厂房四楼	113.533	23.0642
841	广东东日科技实业有限公司（曾用名：广州东日金属模具有限公司）	2009-09-29	2023-12-05	C	33	金属制品业	广东省	广州市	花都区	广州市花都区新华街风神大道毕村西桥	113.177	23.3936
842	东融（广州）信息技术有限公司（曾用名：广州东融电子工程技术有限公司）	2003-05-13	2020-08-19	M	73	研究和试验发展	广东省	广州市	天河区	广州市天河区东圃大马路天力街7号330房（不可作厂房使用）	113.409	23.1232
843	广州东唐生物科技有限公司（曾用名：广州东唐电子科技有限公司）	2008-09-17	2022-12-05	M	73	研究和试验发展	广东省	广州市	黄埔区	广州高新技术产业开发区科学城科学大道182号C2区第10层1002单元	113.442	23.166
844	广东东图规划科技有限公司（曾用名：广州东图土地规划咨询有限公司）	2009-05-14	2022-03-17	M	73	研究和试验发展	广东省	广州市	天河区	广州市天河区天源路804号大院内8栋自编号B07-4C、4E（仅限办公）	113.373	23.1403
845	广州东芝白云自动化系统有限公司	2004-03-08	2024-01-31	C	38	电气机械和器材制造业	广东省	广州市	白云区	广州市白云区神山镇工业区大岭南路18号	113.208	23.3414
846	广州东之旭试验设备有限公司	2000-11-03	2019-07-04	C	40	仪器仪表制造业	广东省	广州市	南沙区	广州市南沙区东涌镇市南路东涌段117号	113.431	22.8998
847	广州都市圈网络科技有限公司	2005-12-01	2022-10-12	M	74	专业技术服务业	广东省	广州市	番禺区	广州市番禺区东环街番禺大道北537号番禺节能科技园番山创业中心1号楼3区801室	113.37	22.9845
848	广州敦和信息技术有限公司	2015-03-26	2023-02-09	I	65	软件和信息技术服务业	广东省	广州市	黄埔区	广州市黄埔区科珠路232号2栋412房（仅限办公）	113.445	23.1763
849	广州多好信息科技有限公司	2013-04-03	2015-11-12	M	73	研究和试验发展	广东省	广州市	天河区	广州市天河区建中路60号四楼428房	113.377	23.1294
850	广州多浦乐电子科技股份有限公司（曾用名：广州多浦乐电子科技有限公司）	2008-01-10	2023-10-13	C	40	仪器仪表制造业	广东省	广州市	黄埔区	广州经济技术开发区开创大道1501号2栋一楼	113.528	23.1642
851	广州恩华特环境技术有限公司	2005-09-08	2024-03-08	M	73	研究和试验发展	广东省	广州市	越秀区	广州市越秀区东风中路515号1001房（自编号：1002-1003单元）	113.283	23.1379
852	广州发际体育用品有限公司	2013-07-16	2017-08-14	C	24	文教、工美、体育和娱乐用品制造业	广东省	广州市	番禺区	广州市番禺区南村镇樟边村井气坊六巷22号一楼	113.39	22.9905
853	广州得舜自动化科技有限公司（曾用名：广州法澳自动化科技有限公司）	2014-01-20	2023-04-27	M	73	研究和试验发展	广东省	广州市	黄埔区	广州市黄埔区科学城南翔一路68号1栋207房	113.449	23.1767
854	广州番禺古西理丰电路板有限公司	1995-08-07	2022-03-25	C	39	计算机、通信和其他电子设备制造业	广东省	广州市	番禺区	广州市番禺区沙湾镇古坝西村工业区	113.338	22.899
855	广州番禺通用文具制品厂有限公司	1991-02-05	2019-06-27	C	24	文教、工美、体育和娱乐用品制造业	广东省	广州市	番禺区	广州市番禺区桥南街陈涌村兴业大道西一横路9号301	113.379	22.9245
856	广州凡科互联网科技股份有限公司	2010-11-16	2023-04-17	I	64	互联网和相关服务	广东省	广州市	海珠区	广州市海珠区工业大道北路67号8号楼301房	113.263	23.1004
857	广州泛美实验室系统科技股份有限公司	2004-11-05	2023-07-17	M	73	研究和试验发展	广东省	广州市	黄埔区	广州市黄埔区开源大道11号B8栋第二层（部位：264室）	113.502	23.1594
858	广州泛舟信息科技有限公司	2014-11-15	2018-01-04	M	73	研究和试验发展	广东省	广州市	天河区	广州市天河区科韵路12号之一13A01室	113.379	23.1322
859	广州方邦电子股份有限公司	2010-12-15	2024-02-29	C	39	计算机、通信和其他电子设备制造业	广东省	广州市	黄埔区	广州市黄埔区东枝路28号	113.487	23.1875
860	广州菲康生物技术有限公司	2010-11-15	2017-12-21	M	73	研究和试验发展	广东省	广州市	黄埔区	广州高新技术产业开发区科学城开源大道11号B4栋第四层420-448房（自主申报）	113.502	23.1594
861	广州菲音信息科技有限公司	2004-04-12	2023-03-09	I	65	软件和信息技术服务业	广东省	广州市	天河区	广州市天河区天河路490号1501、1502自编一、1505、1506号	113.341	23.1386
862	广州飞歌汽车音响有限公司	2007-10-12	2023-06-07	C	39	计算机、通信和其他电子设备制造业	广东省	广州市	黄埔区	广州高新技术产业开发区南翔三路11号二、三栋	113.452	23.1547
863	广州飞将体育器材有限公司	2011-08-23	2022-12-29	C	24	文教、工美、体育和娱乐用品制造业	广东省	广州市	番禺区	广州市番禺区市桥街东环路381号二楼204	113.383	22.9578
864	广州蓝谷电子有限公司（曾用名：广州飞科电子科技有限公司）	2009-08-28	2023-09-06	M	73	研究和试验发展	广东省	广州市	番禺区	广州市番禺区沙湾镇古东村古龙路4号501	113.414	22.9537
865	广州飞锐网络科技有限公司	2007-07-12	2022-11-02	I	65	软件和信息技术服务业	广东省	广州市	南沙区	广州市南沙区黄阁镇蕉西路134号301房A3009（仅限办公）	113.537	22.8062
866	广州飞众信息科技有限公司	2011-06-01	2022-10-18	M	73	研究和试验发展	广东省	广州市	天河区	广州市天河区华强路2号2624房之一（仅限办公用途）	113.323	23.1316
867	广州飞卓科汇信息科技有限公司	2000-08-29	2024-01-17	I	65	软件和信息技术服务业	广东省	广州市	越秀区	广州市越秀区德政北路538号4楼南向403房	113.281	23.138
868	广州分给网络科技股份有限公司	2010-09-26	2021-09-08	M	74	专业技术服务业	广东省	广州市	天河区	广州市天河区黄村北路6号（部位:D03A-16）	113.414	23.1351
869	广州粉丝信息科技有限公司	2014-10-20	2018-11-19	M	73	研究和试验发展	广东省	广州市	天河区	广州市天河区华穗路406号之二（A4-2)1912房（仅限办公）	113.326	23.1328
870	广州丰得利医疗器械股份有限公司（曾用名：广州丰得利实业公司）	1994-01-08	2022-12-05	C	35	专用设备制造业	广东省	广州市	白云区	广州市白云区永平街永泰元下田丛云路815号大院自编8号	113.308	23.2208
871	广州丰桥智能装备有限公司（曾用名：广州丰桥自动化科技有限公司）	2009-05-31	2019-04-03	C	35	专用设备制造业	广东省	广州市	南沙区	广州市南沙区榄核镇广珠路70号之一101	113.388	22.8743
872	广州丰泰美华电缆有限公司	2007-05-09	2023-09-26	C	38	电气机械和器材制造业	广东省	广州市	黄埔区	广州高新技术产业开发区科学城开达路2号	113.485	23.1605
873	广州丰元信息科技有限公司	2012-12-17	2021-09-24	M	73	研究和试验发展	广东省	广州市	天河区	广州市天河区车陂路70号五楼（部位：532室）（不可作厂房使用）	113.398	23.1259
874	广州丰泽源水利科技有限公司	2014-05-27	2023-12-19	M	73	研究和试验发展	广东省	广州市	天河区	广州市天河区思成路23号宏太智慧谷七号楼5楼自编505-507房（仅限办公）	113.423	23.18
875	广东锋尚智能光电股份有限公司（曾用名：广州锋尚电器有限公司）	2008-10-17	2023-07-27	C	38	电气机械和器材制造业	广东省	广州市	番禺区	广州市番禺区洛浦街西三村开发东路3号A幢三楼（部位：B面）	113.271	23.0428
876	广州风禾数字科技有限公司	2011-11-10	2019-08-13	M	73	研究和试验发展	广东省	广州市	天河区	广州市天河区金穗路68号之二803房（本住所限写字楼功能）	113.336	23.1275
877	广州佛朗斯股份有限公司（曾用名：广州佛朗斯机械有限公司）	2007-12-05	2023-11-16	C	43	金属制品、机械和设备修理业	广东省	广州市	番禺区	广州市番禺区石碁镇亚运大道999号	113.452	22.946
878	广州福洋电气科技有限公司	2012-07-19	2023-09-04	M	73	研究和试验发展	广东省	广州市	天河区	广州市天河区瘦狗岭路379号1102房（仅限办公用途）	113.34	23.1553
879	广州复雅机械设备有限公司	2014-03-26	2018-06-28	C	38	电气机械和器材制造业	广东省	广州市	增城区	广州市增城区荔新六路15号（厂房A4-2）	113.737	23.2091
880	广州盖特软件有限公司	2000-04-19	2024-01-09	I	65	软件和信息技术服务业	广东省	广州市	花都区	广州市天河区华景北路201号3206房（仅限办公用途）	113.369	23.1476
881	广州吉姆食品机械有限公司（曾用名：广州港德设备制造有限公司）	2013-04-01	2023-02-21	C	15	酒、饮料和精制茶制造业	广东省	广州市	南沙区	广州市南沙区东涌镇大同村市灵路2号（厂房2）101	113.401	22.8976
882	广州高昌机电股份有限公司	2003-01-16	2022-12-21	C	38	电气机械和器材制造业	广东省	广州市	黄埔区	广州经济技术开发区永和经济区黄旗山路9号	113.548	23.2115
883	广州高大尚网络科技有限公司	2014-03-18	2021-09-13	M	73	研究和试验发展	广东省	广州市	天河区	广州市天河区天河软件园高普路1035号4楼（仅限办公用途）	113.418	23.1784
884	广州高得软件科技有限公司	2013-12-19	2019-12-20	M	73	研究和试验发展	广东省	广州市	天河区	广州市天河区体育西路191号B塔2920-2921（仅限办公）	113.328	23.1461
885	广州高勤计算机科技有限公司	2003-08-09	2017-05-02	M	73	研究和试验发展	广东省	广州市	天河区	广州市天河区天河北路892号709房（本住所限写字楼功能）	113.351	23.1471
886	广州高印电子科技有限公司	2003-10-26	2021-06-24	M	73	研究和试验发展	广东省	广州市	番禺区	广州市番禺区石碁镇市莲路石碁村段82号11号楼1F、2F	113.448	22.9544
887	广州格丹纳仪器有限公司	2014-04-17	2021-10-09	C	40	仪器仪表制造业	广东省	广州市	黄埔区	广州市黄埔区科研路2号自编4栋501、502、504房	113.446	23.176
888	广州格仪朗通用设备有限公司	2013-11-08	2016-01-19	C	34	通用设备制造业	广东省	广州市	从化区	广东从化经济开发区高技术产业园高湖公路18号A厂房首层	113.519	23.4564
889	广州工高电子科技有限公司	2002-08-06	2020-10-30	M	73	研究和试验发展	广东省	广州市	天河区	广州市天河区五山路246、248、250号金山大厦902自编02-03（仅限办公用途）	113.353	23.1497
890	广州谷得网络科技有限公司	2011-03-01	2023-06-28	M	73	研究和试验发展	广东省	广州市	天河区	广州市天河区棠下荷光三横路7号之一	113.38	23.1421
891	广州谷沃信息科技有限公司	2009-12-08	2023-05-26	M	73	研究和试验发展	广东省	广州市	番禺区	广州市番禺区东环街番禺大道北555号天安总部中心14号楼812房	113.375	22.9873
892	广州关键光电子技术有限公司	2000-04-17	2023-09-12	C	39	计算机、通信和其他电子设备制造业	广东省	广州市	黄埔区	广州经济技术开发区沙湾二街13、15号第一层	113.537	23.0719
893	广东冠电科技股份有限公司（曾用名：广州冠电电子科技有限公司）	2012-03-15	2021-06-15	M	73	研究和试验发展	广东省	广州市	荔湾区	广州市荔湾区新虹街40-48号704房（仅限办公）	113.242	23.1336
894	广州冠品信电子科技有限公司	2013-01-17	2023-07-04	M	73	研究和试验发展	广东省	广州市	番禺区	广州市番禺区钟村街胜石村钟创路胜石工业区自编1号301	113.302	22.9814
895	广州冠志新材料科技有限公司	2014-01-22	2021-11-25	M	73	研究和试验发展	广东省	广州市	黄埔区	广州经济技术开发区科学城掬泉路3号广州国际企业孵化器A区A1104、1106	113.454	23.1685
896	广东光大信息科技股份有限公司（曾用名：广州光大教育软件科技股份有限公司）	1995-08-11	2023-03-06	I	65	软件和信息技术服务业	广东省	广州市	黄埔区	广州市萝岗区科学城彩频路7号之一402部位	113.442	23.1694
897	广州光桥通信设备有限公司	2006-10-08	2019-06-28	C	39	计算机、通信和其他电子设备制造业	广东省	广州市	天河区	广州市天河区大灵山路18号8栋203室	113.428	23.1348
898	广电计量检测集团股份有限公司（曾用名：广州广电计量检测股份有限公司）	2002-05-24	2023-12-13	M	74	专业技术服务业	广东省	广州市	番禺区	广州市番禺区石碁镇岐山路8号150	113.446	22.9577
899	广州广电物业管理有限公司	2021-09-08	2021-09-08	K	70	房地产业	广东省	广州市	天河区	广州市天河区员村一横路七号大院64,65号综合楼二楼	113.362	23.1259
900	广州广鸿航空科技有限公司	2013-01-17	2023-12-01	M	73	研究和试验发展	广东省	广州市	越秀区	广州市越秀区先烈中路81号大院117、118号首层自编02-A23房（仅限办公）	113.305	23.1478
901	广州广瑞信息科技有限公司	2012-01-11	2021-01-25	M	73	研究和试验发展	广东省	广州市	天河区	广州市天河区科韵北路108号2楼自编G32房	113.39	23.1661
902	广东广田包装机械有限公司（曾用名：广州广田包装机械有限公司）	2009-04-07	2022-04-07	C	34	通用设备制造业	广东省	广州市	番禺区	广州市番禺区东环街莲花大道中203号117铺	113.379	22.9829
903	广州广涡压缩机有限公司	2010-08-04	2017-05-10	C	34	通用设备制造业	广东省	广州市	番禺区	广州市番禺区石楼镇砺江路11号	113.495	22.9823
904	广州广兴牧业设备集团有限公司	2000-12-12	2021-12-02	C	35	专用设备制造业	广东省	广州市	白云区	广州市白云区太和镇沙亭广兴路2号	113.554	22.785
905	广州地铁工程咨询有限公司（曾用名：广州轨道交通建设监理有限公司）	2006-12-13	2024-02-18	M	74	专业技术服务业	广东省	广州市	越秀区	广州市越秀区环市西路204号大院自编四号楼2、3层（仅限办公用途）	113.261	23.153
906	广州桂圆信息科技发展股份有限公司（曾用名：广州桂圆信息科技有限公司）	2012-11-26	2023-08-07	M	73	研究和试验发展	广东省	广州市	天河区	广州市天河区软件路15号6楼603室	113.42	23.1773
907	广州益伽科技有限公司（曾用名：广州国宇医药科技有限公司）	2012-05-14	2023-02-08	M	73	研究和试验发展	广东省	广州市	黄埔区	广州高新技术产业开发区科学城掬泉路3号广州国际企业孵化器E区E315房	113.454	23.1685
908	广州国睿电子科技有限公司	2011-03-14	2020-04-03	M	73	研究和试验发展	广东省	广州市	黄埔区	广州高新技术产业开发区瑞泰路2号C栋五层自编A1号（自主申报）	113.516	23.1582
909	广州海工船舶设备有限公司	2005-09-28	2023-08-10	C	37	铁路、船舶、航空航天和其他运输设备制造业	广东省	广州市	番禺区	广州市番禺区谢石公路77号B	113.294	23.0006
910	广州海谷电子科技有限公司	2010-06-21	2021-06-18	C	39	计算机、通信和其他电子设备制造业	广东省	广州市	黄埔区	广州高新技术产业开发区科学城香山路17号A503房	113.446	23.1856
911	广东海光云科技股份有限公司（曾用名：广州海光计算机科技开发有限公司）	2008-01-21	2022-11-01	M	75	科技推广和应用服务业	广东省	广州市	天河区	广州市天河区灵山东路4号伟利商务大厦第十三层1309房（仅限办公）	113.431	23.1335
912	广州海景信息技术有限公司	2004-10-18	2022-03-10	I	65	软件和信息技术服务业	广东省	广州市	天河区	广州市天河区棠下二社涌边路69号二层2E10房（仅限办公用途）	113.384	23.1317
913	广州海络通信科技有限公司	2010-07-20	2021-01-20	M	73	研究和试验发展	广东省	广州市	番禺区	广州市番禺区南村镇万博四路20号1座507	113.358	23.0167
914	广州海晟科技有限公司	2005-09-14	2024-01-15	M	73	研究和试验发展	广东省	广州市	天河区	广州市天河区中山大道西89号办公楼（部位：C栋7层703-706）（仅限办公用途，不可作厂房使用）	113.363	23.1409
915	广州翰智软件有限公司	2004-11-04	2023-11-07	F	51	批发业	广东省	广州市	越秀区	广州市越秀区先烈中路83号510自编之十二房号	113.306	23.1479
916	广州汗马电子科技有限公司	2007-05-11	2023-10-26	C	39	计算机、通信和其他电子设备制造业	广东省	广州市	白云区	广州市白云区北太路1633号广州民营科技园科盛路8号配套服务大楼4层A410-16房	113.342	23.302
917	广州汉丰新能源科技有限公司	2013-04-19	2022-12-29	C	39	计算机、通信和其他电子设备制造业	广东省	广州市	白云区	广州市白云区人和镇鹤亭中路66号F栋二楼	113.316	23.3316
918	广州汉正信息技术有限公司	2004-03-29	2019-06-12	I	65	软件和信息技术服务业	广东省	广州市	天河区	广州市天河区中山大道科韵路建华路25号201房（该场所仅限办公用途）	113.379	23.1278
919	广州好档家信息科技有限公司	2012-04-17	2020-06-22	I	65	软件和信息技术服务业	广东省	广州市	黄埔区	广州市黄埔区光谱西路3号附属厂房208.附属厂房209	113.425	23.1645
920	广州好芝生物科技有限公司	2008-12-03	2022-06-21	M	73	研究和试验发展	广东省	广州市	黄埔区	广州高新技术产业开发区广州科学城科学大道182号C2区901单元	113.462	23.1725
921	广州浩动网络科技有限公司	2013-03-20	2024-02-22	I	65	软件和信息技术服务业	广东省	广州市	天河区	广州市天河区棠下大塘工业区B座401房（仅限办公）	113.384	23.1379
922	广州浩宇信息科技有限公司	2012-05-22	2022-02-15	M	73	研究和试验发展	广东省	广州市	天河区	广州市天河区大淋岗大路街35号505室（仅限办公）（不可作厂房使用）	113.443	23.1496
923	广州和辰信息科技有限公司	2012-05-09	2023-05-05	M	73	研究和试验发展	广东省	广州市	番禺区	广州市番禺区沙头街禺山西路329号4座1栋1407、1408	113.348	22.9437
924	广州和信自动化科技有限公司	2010-09-02	2021-07-28	M	73	研究和试验发展	广东省	广州市	白云区	广州市白云区永平街丛云路816号五楼B516房	113.305	23.2203
925	广州和依德厨具有限公司	2008-10-24	2022-11-21	C	38	电气机械和器材制造业	广东省	广州市	番禺区	广州市番禺区石楼镇市莲路石楼路段359号2号厂房（A）	113.481	22.9703
926	广州合邦科技股份有限公司（曾用名：广州合邦信息科技有限公司）	2011-09-16	2024-03-07	I	65	软件和信息技术服务业	广东省	广州市	黄埔区	广州市黄埔区科学大道118、120号1615房	113.437	23.169
927	广州合明软件科技有限公司	2009-04-12	2021-07-02	I	65	软件和信息技术服务业	广东省	广州市	天河区	广州市天河区软件路17号G2栋4楼401房（仅限办公）	113.421	23.1784
928	广东合赢教育科技股份有限公司（曾用名：广州合赢教学设备有限公司）	2006-11-16	2020-08-13	M	73	研究和试验发展	广东省	广州市	黄埔区	广州市黄埔区云埔工业区观达路20号园区4栋M层西侧	113.55	23.1586
929	广州合优网络科技有限公司	2007-08-02	2022-08-16	M	73	研究和试验发展	广东省	广州市	天河区	广州市天河区东圃一横路23号2栋506室	113.407	23.1265
930	广州河海盟润新能源有限公司	2011-12-29	2022-06-17	M	73	研究和试验发展	广东省	广州市	番禺区	广州市番禺区小谷围街明志街1号信息枢纽楼811房	113.404	23.0512
931	广州黑瞳网络科技有限公司	2012-06-14	2023-10-25	M	73	研究和试验发展	广东省	广州市	海珠区	广州市海珠区新港西凤景路47号之一铺A02	113.302	23.1062
932	广州恒成智道信息科技有限公司	2012-07-18	2021-11-10	M	73	研究和试验发展	广东省	广州市	越秀区	广州市越秀区寺右新马路108号丰伟大厦12楼	113.315	23.1255
933	广州恒德环保科技有限公司	2002-04-25	2021-09-13	M	73	研究和试验发展	广东省	广州市	天河区	广州市天河区瘦狗岭路411号1309室（仅限办公）（不可作厂房用途）	113.342	23.1547
934	广州恒河环保设计研究院股份有限公司	2004-09-03	2023-02-20	M	74	专业技术服务业	广东省	广州市	天河区	广州市天河区翠华街109号201房	113.361	23.1371
935	广州恒巨信息科技有限公司	2010-07-22	2023-10-26	M	73	研究和试验发展	广东省	广州市	天河区	广州市天河区五山路246、248、250号金山大厦602自编603A、04部位（仅限办公用途）	113.353	23.1497
936	广州恒宗达科技股份有限公司（曾用名：广州恒宗达电力科技有限公司）	2011-03-23	2022-02-22	M	73	研究和试验发展	广东省	广州市	天河区	广州市天河区天河北路663号广东省机械研究所大院自编6栋二楼自编203房（仅限办公）	113.347	23.1498
937	广州鸿彩舞台设备有限公司	2007-05-28	2019-04-03	C	38	电气机械和器材制造业	广东省	广州市	番禺区	广州市番禺区大龙街沙涌村长沙路30号	113.432	22.9601
938	广州鸿蒙信息科技有限公司	2007-06-22	2022-10-26	I	65	软件和信息技术服务业	广东省	广州市	越秀区	广州市越秀区麓苑路51号403B16房	113.292	23.1477
939	广州鸿讯电子有限公司	2007-09-30	2023-08-21	C	39	计算机、通信和其他电子设备制造业	广东省	广州市	花都区	广州市花都区新华街乐同村石陂经济合作社	113.242	23.4162
940	广州鸿远信息科技有限公司	2004-08-01	2023-07-31	I	65	软件和信息技术服务业	广东省	广州市	天河区	广州市天河区体育西路189号16楼H-1608房（仅限办公）	113.327	23.1447
941	广州洪森科技有限公司	2013-07-22	2023-06-29	M	73	研究和试验发展	广东省	广州市	天河区	广州市天河区黄埔大道中662号413室，414室（仅限办公）	113.352	23.1248
942	广州宏和网络科技有限公司	2005-07-12	2021-07-30	M	73	研究和试验发展	广东省	广州市	黄埔区	广州市黄埔区飞晟二街2号511房（仅限办公）	113.487	23.1875
943	广州宏庆电子有限公司	2011-07-18	2024-01-08	M	73	研究和试验发展	广东省	广州市	黄埔区	广州市黄埔区凝彩路26号（自编五栋）2009/2010房（仅限办公）	113.458	23.1773
944	广州宏融信息技术有限公司	2013-08-01	2023-06-16	M	75	科技推广和应用服务业	广东省	广州市	天河区	广州市天河区思成路1号5楼503、504房	113.423	23.179
945	广州宏元信息科技有限公司	2011-10-14	2023-08-24	M	73	研究和试验发展	广东省	广州市	黄埔区	广州市黄埔区敏盛街10号（自编C3栋）506房	113.487	23.1875
946	广州宏韵医药科技股份有限公司	2002-08-30	2022-07-07	M	73	研究和试验发展	广东省	广州市	黄埔区	广州高新技术产业开发区科学城掬泉路3号广州国际企业孵化器B区B301号房	113.454	23.1685
947	广州弘承持信电子商务有限公司	2008-06-30	2021-11-19	F	51	批发业	广东省	广州市	白云区	广州市白云区同和路324号208房	113.336	23.213
948	广州弘度信息科技有限公司	2013-03-29	2023-07-13	M	73	研究和试验发展	广东省	广州市	海珠区	广州市海珠区桥头大街248号之十一101房（仅限办公）	113.382	23.0947
949	广州厚源电子科技有限公司	2012-06-25	2021-06-23	M	73	研究和试验发展	广东省	广州市	天河区	广州市天河区广州大道中1268号803A(自编B28)（仅限办公）	113.373	23.1403
950	广州互乐计算机服务有限公司	2011-01-12	2023-04-28	I	65	软件和信息技术服务业	广东省	广州市	天河区	广州市天河区车陂路113号写字楼第三层3949（仅限办公）	113.396	23.1274
951	广州互通气动机器工程有限公司	1995-10-06	2022-05-20	C	35	专用设备制造业	广东省	广州市	南沙区	广州市南沙区东涌镇新村街2号	113.567	22.7658
952	广州花都通用集团有限公司	1994-08-13	2020-06-30	C	35	专用设备制造业	广东省	广州市	花都区	广州市花都区炭步镇茶塘村	113.111	23.3217
953	广州花语精细化工有限公司	2007-06-13	2018-06-13	C	26	化学原料和化学制品制造业	广东省	广州市	黄埔区	广州中新广州知识城凤凰三路12号	113.503	23.3992
954	广州华大生物科技有限公司	2008-02-28	2021-12-15	M	75	科技推广和应用服务业	广东省	广州市	黄埔区	广州高新技术产业开发区伴河路84号（仅限办公）	113.519	23.158
955	广州华德汽车弹簧有限公司	1993-12-27	2023-10-27	C	36	汽车制造业	广东省	广州市	增城区	广州市增城区永宁街创业大道158号	113.666	23.1955
956	广州华锋机电设备有限公司	2002-07-22	2024-04-07	C	35	专用设备制造业	广东省	广州市	荔湾区	广州市荔湾区增南路388号之二	113.22	23.0801
957	广州华烽启望电子科技有限公司	2006-06-12	2023-03-30	C	39	计算机、通信和其他电子设备制造业	广东省	广州市	黄埔区	广州经济技术开发区开发大道225号、锦绣路46号第九层	113.531	23.0649
958	广州华弘生物科技有限公司	2014-06-09	2020-11-13	M	75	科技推广和应用服务业	广东省	广州市	黄埔区	广州高新技术产业开发区科学城伴河路84号自编二栋101	113.519	23.1579
959	广州华联云谷信息科技有限公司（曾用名：广州华企联信息科技有限公司）	2014-07-24	2024-03-28	M	73	研究和试验发展	广东省	广州市	海珠区	广州市海珠区江南大道南368号之10首层至三层自编C55（仅限办公）	113.285	23.113
960	东方电气（广州）重型机器有限公司	2003-09-02	2024-03-25	C	34	通用设备制造业	广东省	广州市	南沙区	广州市南沙区黄阁镇连溪大道313号	113.539	22.8331
961	东方国际集装箱（广州）有限公司	2006-01-17	2023-05-10	C	33	金属制品业	广东省	广州市	南沙区	广州市南沙区万顷沙镇红安路2号	113.578	22.6535
962	广州艾捷斯医疗器械有限公司	2007-08-17	2022-01-27	C	35	专用设备制造业	广东省	广州市	番禺区	广州市番禺区石楼镇大岗工业区2号楼	113.493	22.9871
963	广州爱德医疗科技有限公司	2007-04-09	2023-09-20	M	75	科技推广和应用服务业	广东省	广州市	海珠区	广州市海珠区新港西路135号大院园西区705号楼中大科技园B座自编号603室（仅限办公）	113.297	23.0994
964	广州爱迪绿色印刷科技有限公司	2010-11-09	2021-08-18	M	73	研究和试验发展	广东省	广州市	黄埔区	广州经济技术开发区蓝玉四街九号科技园2号厂房5楼（北508）	113.534	23.0638
965	广州爱孚圣电子科技有限公司	2012-05-28	2023-06-27	M	75	科技推广和应用服务业	广东省	广州市	黄埔区	广州高新技术产业开发区科学城揽月路3号广州国际企业孵化器G区G210号房	113.454	23.1685
966	广州安赛化工有限公司	2010-03-25	2020-07-08	C	26	化学原料和化学制品制造业	广东省	广州市	番禺区	广州市番禺区南村镇陈边村涌边街1号	113.378	23.0257
967	广州安适易环境科技有限公司	2012-05-21	2020-11-23	M	73	研究和试验发展	广东省	广州市	荔湾区	广州市荔湾区荷景南路23号自编1栋B401-1房（可作厂房）	113.254	23.0614
968	广州奥工喷雾设备有限公司	2006-03-03	2024-03-07	C	35	专用设备制造业	广东省	广州市	花都区	广州市花都区花东镇永星路2号9栋603房	113.345	23.4371
969	广州奥鹏能源科技有限公司	2010-05-10	2020-01-19	M	73	研究和试验发展	广东省	广州市	黄埔区	广州市黄埔区开源大道182号自编二栋1-4楼	113.517	23.1627
970	广州澳兰斯水处理设备有限公司	2009-03-18	2019-04-28	M	73	研究和试验发展	广东省	广州市	番禺区	广州市番禺区钟村街高沙工业区C5栋5楼	113.307	22.9792
971	广州澳森液压元件有限公司	2005-10-31	2021-04-20	C	34	通用设备制造业	广东省	广州市	黄埔区	广州市黄埔区观达路20号2栋303房	113.55	23.1586
972	广州澳通电线电缆有限公司	1996-02-06	2022-09-29	C	38	电气机械和器材制造业	广东省	广州市	黄埔区	广州市黄埔区星玥街7号1602房	113.487	23.1875
973	广州柏赛罗药业有限公司	1995-11-29	2020-12-31	C	27	医药制造业	广东省	广州市	黄埔区	广州市黄埔区观达路20号自编二栋四楼403房	113.55	23.1586
974	广州棒谷科技股份有限公司（曾用名：广州棒谷网络科技有限公司）	2009-02-23	2023-08-08	I	65	软件和信息技术服务业	广东省	广州市	白云区	广州市白云区北太路1633号广州民营科技园科盛路8号配套服务大楼5层A502房	113.342	23.302
975	广州保诺自动化控制设备有限公司	2006-05-18	2023-12-12	M	73	研究和试验发展	广东省	广州市	番禺区	广州市番禺区洛浦街洛溪新城吉祥北园吉祥南街30幢12号	113.303	23.0504
976	广州贝奥吉因生物科技股份有限公司（曾用名：广州贝奥吉因生物科技有限公司）	2011-09-27	2020-12-18	M	73	研究和试验发展	广东省	广州市	天河区	广州高新技术产业开发区瑞泰路2号自编（1）栋C栋厂房第二层	113.515	23.1581
977	广州贝护佳医疗科技有限公司	2011-10-12	2023-06-27	M	73	研究和试验发展	广东省	广州市	黄埔区	广州高新技术产业开发区科学城掬泉路3号广州国际企业孵化器D区D201、D202、D203号房	113.453	23.1689
978	广州碧华环保科技有限公司	2011-09-15	2017-10-09	M	74	专业技术服务业	广东省	广州市	黄埔区	广州市黄埔区荔联街宏明路183号183-225号D410-2房	113.551	23.1195
979	广州沧恒自动控制科技有限公司	2014-06-06	2023-11-14	M	73	研究和试验发展	广东省	广州市	黄埔区	广州市黄埔区揽月路3号G栋102房，G栋103房	113.453	23.1675
980	广州草木蕃环境科技有限公司	2010-11-25	2023-09-05	N	77	生态保护和环境治理业	广东省	广州市	天河区	广州市天河区龙林西街8号101房（部位：整栋）（仅限办公）	113.369	23.1304
981	长视科技股份有限公司（曾用名：广州长视科技股份有限公司）	2006-04-29	2022-07-01	M	73	研究和试验发展	广东省	广州市	黄埔区	广州市黄埔区东明三路18号自编2栋	113.516	23.1542
982	广州超前计算机科技有限公司	2008-02-01	2023-12-21	I	65	软件和信息技术服务业	广东省	广州市	天河区	广州市天河区华强路9号907房（仅限办公）	113.327	23.1319
983	广州辰东新材料有限公司	2013-03-07	2024-03-05	C	29	橡胶和塑料制品业	广东省	广州市	增城区	广州市增城区增江街经三路12号	113.859	23.2769
984	广州成汉电子科技有限公司	2009-10-21	2020-07-27	C	39	计算机、通信和其他电子设备制造业	广东省	广州市	荔湾区	广州市荔湾区招村北外约38号第四座1、2、4层、第三座1-4层	113.248	23.1235
985	广州诚鼎机器人有限公司	2006-11-22	2023-07-21	C	35	专用设备制造业	广东省	广州市	番禺区	广州市番禺区钟村街诚鼎街8号101	113.307	22.9696
986	广州川吉电气技术有限公司	2007-06-22	2022-10-10	M	73	研究和试验发展	广东省	广州市	天河区	广州市天河区吉山英君路1号1栋313	113.432	23.1351
987	广州创图信息科技有限公司	2013-06-13	2022-08-04	M	75	科技推广和应用服务业	广东省	广州市	海珠区	广州市海珠区工业大道南882号之十六102室	113.277	23.0897
988	广州达森灯光股份有限公司	2010-11-04	2019-03-25	C	38	电气机械和器材制造业	广东省	广州市	花都区	广州市花都区花山镇华侨科技工业园育才路12号	113.224	23.4741
989	广州大恒系统工程有限公司（曾用名：广州大恒计算机科技有限公司）	2009-09-01	2024-03-22	E	48	土木工程建筑业	广东省	广州市	天河区	广州市天河区天河东路242号105、106、107房(不可作厂房使用)（仅限办公）	113.341	23.1443
990	广州大一互联网络科技有限公司	2006-12-29	2023-09-25	I	64	互联网和相关服务	广东省	广州市	天河区	广州市天河区柯木塱南路22号3栋101-4房（仅限办公）	113.41	23.1942
991	广州大中科技发展有限公司	2000-11-02	2017-06-15	M	73	研究和试验发展	广东省	广州市	黄埔区	广州经济技术开发区光谱西路3号研发厂房七层701房	113.425	23.1648
992	广州德港水产设备科技有限公司	1996-05-31	2021-12-06	M	73	研究和试验发展	广东省	广州市	番禺区	广州市番禺区石壁街石壁四村谢石公路86号3栋101	113.276	23.0058
993	广州德森光电科技有限公司	2011-01-17	2022-08-29	C	38	电气机械和器材制造业	广东省	广州市	花都区	广州市花都区花山镇两龙路69号1-8号	113.282	23.4635
994	广州滴客日化科技有限公司	2013-08-21	2019-09-24	F	51	批发业	广东省	广州市	番禺区	广州市番禺区石楼镇创启路63号创启2号楼7楼	113.465	22.9826
995	广州迪柯尼服饰股份有限公司（曾用名：广州迪柯尼投资发展有限公司）	2012-10-22	2022-09-02	C	18	纺织服装、服饰业	广东省	广州市	花都区	广州市花都区花都大道西23号	113.127	23.3653
996	广州迪斯环保设备有限公司	2009-05-21	2021-12-13	C	35	专用设备制造业	广东省	广州市	番禺区	广州市番禺区大龙街富怡路430号63-66	113.405	22.9589
997	广州典派厨具有限公司	2014-10-09	2021-06-18	C	33	金属制品业	广东省	广州市	番禺区	广州市番禺区石楼镇南派村官涌口北边2号之二	113.501	22.941
998	广州东港安全印刷有限公司	2007-03-12	2023-10-10	M	73	研究和试验发展	广东省	广州市	黄埔区	广州市高新技术产业开发区科学城南云五路5号	113.459	23.1493
999	广州东升农场有限公司	2002-11-11	2020-09-10	A	01	农业	广东省	广州市	南沙区	广州市南沙区大岗镇庙贝村	113.454	22.7961
1000	广州动创信息科技有限公司	2013-10-24	2023-09-06	M	73	研究和试验发展	广东省	广州市	番禺区	广州市番禺区沙头街横江村第一工业区B幢202A	113.328	22.9455
1001	广州番禺宏昌机电设备制造有限公司	1999-04-01	2023-10-16	C	38	电气机械和器材制造业	广东省	广州市	番禺区	广州市番禺区市桥大罗村东约新村大街１４号	113.356	22.9683
1002	广州飞能电子有限公司	2012-12-06	2020-12-07	C	39	计算机、通信和其他电子设备制造业	广东省	广州市	番禺区	广州市番禺区钟村街钟二村好世界大街46号二层	113.327	22.9837
1003	广州丰兴信息科技有限公司	2013-10-10	2024-03-14	M	73	研究和试验发展	广东省	广州市	天河区	广州市天河区高普路1021号5楼5903号（仅限办公）	113.419	23.1791
1004	广州枫叶管业有限公司	2004-12-23	2024-01-29	C	29	橡胶和塑料制品业	广东省	广州市	花都区	广州市花都区花都大道中213号	113.421	23.4335
1005	广州锋网信息科技有限公司	2012-05-14	2018-08-15	I	65	软件和信息技术服务业	广东省	广州市	天河区	广州市天河区国家软件园基地高普路115号第304房	113.422	23.1828
1006	广州福得电子科技有限公司	2011-11-08	2023-08-04	C	38	电气机械和器材制造业	广东省	广州市	花都区	广州市花都区花山镇三东大道198号201厂	113.264	23.415
1007	广州弗赛生物科技有限公司	2008-04-28	2023-05-17	M	73	研究和试验发展	广东省	广州市	黄埔区	广州高新技术产业开发区科学城科技创新基地D区402	113.453	23.1689
1008	广州富森环保科技股份有限公司	2001-11-19	2022-05-27	M	73	研究和试验发展	广东省	广州市	天河区	广州市天河区黄埔大道西100号之一509室	113.342	23.1318
1009	广州高力电缆附件有限公司	1999-02-26	2020-12-31	C	38	电气机械和器材制造业	广东省	广州市	黄埔区	广州高新技术产业开发区东区建业三路6号自编第二栋二层202A	113.537	23.1379
1010	广州高盛生物科技有限公司	2007-04-05	2023-04-12	M	75	科技推广和应用服务业	广东省	广州市	黄埔区	广州高新技术产业开发区科学城揽月路3号广州国际企业孵化器F区F905	113.454	23.1685
1011	广州格雷特生物科技有限公司	2011-05-17	2023-08-17	M	73	研究和试验发展	广东省	广州市	黄埔区	广州市黄埔区开泰大道188号8楼自编805房	113.504	23.1714
1012	广州光点信息科技股份有限公司（曾用名：广州光点信息科技有限公司）	2011-04-11	2024-03-18	I	65	软件和信息技术服务业	广东省	广州市	黄埔区	广州市黄埔区茅岗路848号5楼C115室	113.446	23.1252
1013	广州广汽优利得汽车内饰系统研发有限公司	-	-	M	73	研究和试验发展	广东省	广州市	番禺区	广州市番禺区化龙镇龙秀路9号	113.491	23.0563
1014	广州广一大气治理工程有限公司	2000-05-19	2022-07-13	C	35	专用设备制造业	广东省	广州市	黄埔区	广州市高新技术产业开发区香山路17号办公楼5楼501房	113.446	23.1856
1015	广州国开信息科技有限公司	2012-05-02	2023-12-27	I	65	软件和信息技术服务业	广东省	广州市	天河区	广州市天河区中山大道西89号办公楼（部位：C栋708）（仅限办公用途）	113.363	23.1409
1016	广州海豹光电科技有限公司	2009-12-11	2023-12-04	C	35	专用设备制造业	广东省	广州市	黄埔区	广州市黄埔区科研路3号5栋303、305房	113.447	23.176
1017	广州海川信息科技有限公司	2004-10-25	2023-08-17	M	75	科技推广和应用服务业	广东省	广州市	海珠区	广州市海珠区敦和路189号大院第2栋自编501房	113.285	23.1126
1018	广州海峰信息科技有限公司	2007-05-19	2023-05-05	M	73	研究和试验发展	广东省	广州市	天河区	广州市天河区黄埔大道中259号北座506房（部分:A）	113.344	23.1335
1019	广州广电智能科技有限公司（曾用名：广州海格智能科技有限公司）	2000-07-25	2023-12-20	M	73	研究和试验发展	广东省	广州市	花都区	广州市花都区花东镇富民路6号211房	113.337	23.4433
1020	广州海之光网络股份有限公司（曾用名：广州海之光通信技术股份有限公司）	2010-04-12	2022-04-08	M	73	研究和试验发展	广东省	广州市	番禺区	广州市番禺区小谷围街明志街1号1栋505-1房	113.404	23.0516
1021	广州汉马自动化控制设备有限公司	2009-11-11	2024-01-08	C	34	通用设备制造业	广东省	广州市	番禺区	广州市番禺区石楼镇华山路6号（A厂房）	113.481	22.9674
1022	广州好莱客创意家居股份有限公司	2007-04-09	2023-10-31	C	21	家具制造业	广东省	广州市	黄埔区	广州经济技术开发区东区连云路8号	113.538	23.1325
1023	广州和实生物技术有限公司	2014-03-05	2023-11-29	M	75	科技推广和应用服务业	广东省	广州市	黄埔区	广州高新技术产业开发区科学城开源大道11号A8栋第四层B单元	113.502	23.1594
1024	广州和仕康生物技术有限公司	2010-03-15	2021-11-16	M	73	研究和试验发展	广东省	广州市	黄埔区	广州市黄埔区起云路8号5栋402房（仅限办公）	113.435	23.1738
1025	广州和跃信息科技有限公司	2013-09-09	2020-06-29	I	65	软件和信息技术服务业	广东省	广州市	天河区	广州市天河区黄埔大道东555号3-217房	113.353	23.1334
1026	广州和晖科技有限公司	1999-04-21	2020-06-04	I	65	软件和信息技术服务业	广东省	广州市	天河区	广州市天河区黄埔大道西路468号802室	113.369	23.1304
1027	广州赫尔普化工有限公司	2002-03-18	2023-11-29	C	26	化学原料和化学制品制造业	广东省	广州市	黄埔区	广州市黄埔区石化路１７０号	113.476	23.1107
1028	广州赫福高活动隔音屏风制品有限公司	2007-08-06	2022-10-25	C	21	家具制造业	广东省	广州市	番禺区	广州市番禺区石楼镇潮田工业区华山路自编23号C	113.489	22.9638
1029	广州鸿鑫勘测技术有限公司	2011-07-12	2022-12-27	M	74	专业技术服务业	广东省	广州市	天河区	广州市天河区东圃二马路67号22、23、24房部位22-318房（仅限办公用途）	113.408	23.1178
1030	广州弘博音响有限公司	2007-05-29	2022-06-23	C	39	计算机、通信和其他电子设备制造业	广东省	广州市	番禺区	广州市番禺区钟村街钟一村“高沙”厂房一号	113.308	22.979
1031	广州弘亚数控机械股份有限公司	2006-11-17	2023-06-15	C	34	通用设备制造业	广东省	广州市	黄埔区	广州市黄埔区云埔工业区云开路3号	113.537	23.1602
1032	广州佳晨皮具有限公司（曾用名：广州红谷皮具有限公司）	2008-01-18	2023-07-06	C	19	皮革、毛皮、羽毛及其制品和制鞋业	广东省	广州市	花都区	广州市花都区新雅街永利路9号	113.25	23.3671
1033	广州华旻信息科技有限公司	2009-12-03	2022-08-22	I	65	软件和信息技术服务业	广东省	广州市	越秀区	广州市越秀区环市东路450号广东华信中心14层1406房	113.305	23.1404
1034	广州华科机械设备制造有限公司	2012-02-10	2022-06-08	C	34	通用设备制造业	广东省	广州市	花都区	广州市花都区新华街工业大道18号大陵新村工业区	113.204	23.3787
1035	广州华锐技术有限公司（曾用名：广州华锐软件有限公司）	2012-01-11	2022-09-13	M	74	专业技术服务业	广东省	广州市	黄埔区	广州经济技术开发区科学大道33号五栋4层409、411	113.432	23.1725
1036	广州华夏汇海科技有限公司	2008-05-09	2020-09-25	C	39	计算机、通信和其他电子设备制造业	广东省	广州市	荔湾区	广州市荔湾区茶滘路茶滘桃湾工业厂房自编2号C幢4楼	113.231	23.0939
1037	广州华资软件技术有限公司	2014-04-02	2024-03-05	I	65	软件和信息技术服务业	广东省	广州市	天河区	广州市天河区建中路12号首层	113.379	23.1326
1038	广州环发环保工程有限公司	2022-08-12	2024-02-06	N	77	生态保护和环境治理业	广东省	广州市	海珠区	广州市海珠区晖悦三街22号2507房	113.386	23.1071
1039	广州环亚化妆品科技股份有限公司（曾用名：广州环亚化妆品科技有限公司）	2006-02-16	2021-11-02	C	26	化学原料和化学制品制造业	广东省	广州市	黄埔区	广州高新技术产业开发区广州科学城科林路15号	113.457	23.1472
1040	广州煌牌自动设备有限公司	2006-09-06	2024-03-26	C	35	专用设备制造业	广东省	广州市	番禺区	广州市番禺区大龙街富怡路451号之四	113.401	22.9566
1041	广州辉群智能科技有限公司	2013-04-19	2024-04-03	M	73	研究和试验发展	广东省	广州市	番禺区	广州市番禺区大龙街市新路新水坑段49号6栋402铺	113.399	22.9816
1042	广州慧佳信息技术有限公司	2013-09-04	2023-05-23	M	73	研究和试验发展	广东省	广州市	天河区	广州市天河区五山翰景路1号金星大厦501号C14（仅限办公用途）	113.354	23.1498
1043	广东晔生科技股份有限公司（曾用名：广州慧路软件科技有限公司）	2009-08-26	2023-08-15	I	65	软件和信息技术服务业	广东省	广州市	海珠区	广州市海珠区华洲路30号1单元301、302室	113.352	23.0817
1044	广州惠伟智能科技有限公司	2012-05-30	2020-06-16	M	73	研究和试验发展	广东省	广州市	黄埔区	广州高新技术产业开发区科学城开源大道11号B9栋601室自编618房	113.442	23.166
1045	广州吉赛生物科技股份有限公司（曾用名：广州吉赛生物科技有限公司）	2010-06-08	2024-02-27	M	73	研究和试验发展	广东省	广州市	黄埔区	广州高新技术产业开发区科学城掬泉路3号广州国际企业孵化器D区D706房	113.453	23.1689
1046	广州集美多媒体科技有限公司	2013-09-11	2023-05-12	M	74	专业技术服务业	广东省	广州市	越秀区	广州市越秀区	113.273	23.1353
1047	广东际洲科技股份有限公司（曾用名：广州际洲信息科技有限公司）	2014-06-17	2021-02-05	I	65	软件和信息技术服务业	广东省	广州市	黄埔区	广州市黄埔区光谱中路11号3栋209房（仅限办公）	113.451	23.1655
1048	广州嘉伟计算机科技有限公司	2003-04-08	2023-03-01	M	73	研究和试验发展	广东省	广州市	番禺区	广州市番禺区大龙街亚运大道226号二层245室	113.374	22.9923
1049	广州佳彬网络科技有限公司	2013-08-01	2023-09-21	M	73	研究和试验发展	广东省	广州市	海珠区	广州市海珠区工业大道南656号之一3楼317房之97房	113.279	23.0907
1050	广州佳硕信息科技股份有限公司（曾用名：广州佳硕信息科技有限公司）	2013-09-05	2022-07-14	I	65	软件和信息技术服务业	广东省	广州市	黄埔区	广州高新技术产业开发区科学大道121号402-18	113.447	23.1716
1051	广州佳图软件有限公司	2006-09-14	2024-02-27	M	73	研究和试验发展	广东省	广州市	荔湾区	广州市荔湾区花地大道中51号二层B239房（仅限办公用途）	113.242	23.1012
1052	广州家居热线网络科技有限公司	2012-04-23	2023-11-28	M	75	科技推广和应用服务业	广东省	广州市	海珠区	广州市海珠区桥头大街248号之十五302房（仅限办公）	113.381	23.0948
1053	广州杰迅通信技术有限公司	2009-02-25	2016-02-05	M	75	科技推广和应用服务业	广东省	广州市	黄埔区	广州经济技术开发区科学城彩频路11号A508	113.443	23.1686
1054	广州捷世通供应链股份有限公司（曾用名：广州捷世通物流股份有限公司）	2000-07-04	2023-11-20	G	53	铁路运输业	广东省	广州市	黄埔区	广州保税区金桥路6号405室	113.542	23.0721
1055	广州金财互联税务顾问有限公司	2012-08-02	2023-07-06	L	72	商务服务业	广东省	广州市	黄埔区	广州市黄埔区科学大道82-88号（双号）（C3栋）701房	113.435	23.169
1056	广州金关节能科技发展有限公司	2003-10-27	2023-10-27	M	73	研究和试验发展	广东省	广州市	海珠区	广州市海珠区江南大道南1158号804房（仅限办公）	113.339	23.0922
1057	广州金十信息科技有限公司	2014-04-08	2023-11-10	I	65	软件和信息技术服务业	广东省	广州市	海珠区	广州市海珠区滨江中路308号19楼全层	113.278	23.1187
1058	广州金主实业有限公司	2009-08-12	2023-08-14	M	75	科技推广和应用服务业	广东省	广州市	番禺区	广州市番禺区南村镇万惠一路48号2811房	113.353	23.013
1059	广州今宏信息科技有限公司	2011-09-06	2019-12-27	M	73	研究和试验发展	广东省	广州市	天河区	广州市天河区大观中路492号广东岭南职业技术学院岭南科技中心二楼B-3室（本住所限写字楼功能）	113.423	23.1743
1060	广州晶锐信息技术有限公司	2009-12-29	2018-04-18	M	73	研究和试验发展	广东省	广州市	花都区	广州市花都区新雅街镜湖大道8号C3-4	113.256	23.3798
1061	广州京泽通信科技有限公司	2012-09-21	2023-12-06	M	73	研究和试验发展	广东省	广州市	天河区	广州市天河区广棠西路4号整栋（部位：301）	113.392	23.1436
1062	广州骏伯网络科技有限公司（曾用名：广州骏伯网络科技股份有限公司）	2012-02-23	2023-09-26	I	64	互联网和相关服务	广东省	广州市	天河区	广州市天河区博汇街6号5栋302、303、305房	113.382	23.1468
1063	广州骏域建广告设计有限公司	2024-03-05	2024-03-05	I	65	软件和信息技术服务业	广东省	广州市	番禺区	广州市番禺区南村镇番禺大道北123号之一H311	113.356	23.0001
1064	广州卡司顿机电技术有限公司	2011-11-11	2017-05-12	C	35	专用设备制造业	广东省	广州市	花都区	广州市花都区炭步镇炭南路南街工业区23号（可作厂房使用）	113.112	23.3479
1065	广州凯膜过滤设备有限公司	2007-01-16	2023-03-24	C	35	专用设备制造业	广东省	广州市	番禺区	广州市番禺区钟村街汉兴中路156号719号（不可作厂房使用）	113.342	22.9969
1066	广州康代生物科技有限公司	2010-05-13	2023-05-24	M	75	科技推广和应用服务业	广东省	广州市	番禺区	广州市番禺区新造镇兴业路蚕坑岗坪自编2号之一	113.39	23.0091
1067	广州康普顿至高建材有限公司	2008-01-17	2023-11-21	C	33	金属制品业	广东省	广州市	番禺区	广州市番禺区石楼镇岳溪村松岗工业区	113.477	22.991
1068	广州仟山羽珠宝股份有限公司（曾用名：广州康芙莱照明科技股份有限公司）	2010-03-08	2020-09-22	C	24	文教、工美、体育和娱乐用品制造业	广东省	广州市	黄埔区	广州经济技术开发区锦绣路明华三街五号D1-3光叶行大厦103座	113.529	23.0645
1069	广州科卢斯流体科技有限公司	2013-10-18	2022-08-08	M	75	科技推广和应用服务业	广东省	广州市	黄埔区	广州市黄埔区黄埔东路266号504房	113.462	23.1062
[truncated: 6,995 more rows]

## Sheet: 2018-2020
Number	Company Name	Date of Establishment	Date of Approval	Industry Code (Category)	Industry Code (Major Category)	Industry Sector	Province	City	District	Address	Longitude	Latitude
[truncated: 13,043 more rows]

[truncated: 1 more sheets: 2021-2023]
