# Supplementary material for: Investigation on spatiotemporal evolution and influencing factors of urban innovation space: a case study of Guangzhou
Source: Research Square preprint supplement (doi:10.21203/rs.3.rs-8356472/v1), 2026-01-16
Supplement: Supplementary file 5 [file Spatial autocorrelation.xlsx]

## Sheet: 空间自相关
	Moran I	Expected Index	Variance	z-score	p
2008	0.334993	-0.000128	6.2e-05	42.4081	0
2011	0.200799	-0.000128	6.4e-05	25.1597	0
2014	0.307031	-0.000128	6.2e-05	38.9907	0
2017	0.464442	-0.000128	6.5e-05	57.5331	0
2020	0.452553	-0.000128	6.6e-05	55.6916	0
2022	0.430222	-0.000128	6.6e-05	52.9566	0
年份	Moran I	z-score	p
2008	0.334993	42.4081	0
2011	0.200799	25.1597	0
2014	0.307031	38.9907	0
2017	0.464442	57.5331	0
2020	0.452553	55.6916	0
2022	0.430222	52.9566	0
