# Supplementary material for: Investigation on spatiotemporal evolution and influencing factors of urban innovation space: a case study of Guangzhou
Source: Research Square preprint supplement (doi:10.21203/rs.3.rs-8356472/v1), 2026-01-16
Supplement: Supplementary file 6 [file Standard Elliptical Deviation.xlsx]

## Sheet: Sheet1
Standard Elliptical Deviation
year	2008	2011	2014	2017	2020	2022
shape_Leng[km]	98.2866	119.312	114.553	115.453	127.631	136.016
shape_Area[km²]	754.548	1067.83	1004.12	1008.93	1212.29	1407.23
Center X	744964	746361	745770	744139	745214	746659
Center Y	2.56215e+06	2.56179e+06	2.56332e+06	2.56092e+06	2.56074e+06	2.561e+06
XStdDist	13861.3	15098.1	15199.5	14913.5	15876.4	17778.9
YStdDist	17328.3	22514.3	21029.7	21535.6	24307.2	25196.4
Rotation	165.482	157.731	168.242	165.292	164.858	166.138
Longitude	113°23'32.986"E	113°24'21.849"E	113°24'1.989"E	113°23'3.295"E	113°23'40.939"E	113°24'31.867"E
Latitude	23°9'0.281"N	23°9'0.281"N	23°9'38.162"N	23°8'20.969"N	23°8'14.426"N	23°8'22.293"N
年份	2008	2011	2014	2017	2020	2022
Average center coordinate X	113.233	113.242	113.242	113.233	113.234	113.243
Average center coordinate Y	23.903	23.903	23.938	23.821	23.814	23.822
Circumference	98.2866	119.312	114.553	115.453	127.631	136.016
Area	754.548	1067.83	1004.12	1008.93	1212.29	1407.23
Direction	165.482	157.731	168.242	165.292	164.858	166.138
XStdDist	13861.3	15098.1	15199.5	14913.5	15876.4	17778.9
YStdDist	17328.3	22514.3	21029.7	21535.6	24307.2	25196.4
